# Supplementary material for: Prions induce minor genome-wide translational changes in neurons compared to glia
Source: bioRxiv preprint, doi:10.1101/2020.06.26.172841, version 1 (2020-06-27)
Supplement: Supplementary File 2 [file 172841_file05.xlsx]

## Sheet: SupplementaryTable2
GeneID	MGIsymbol	noCre_CX_13_rlog	noCre_CX_16_rlog	noCre_HC_14_rlog	noCre_HS_11_rlog	noCre_HS_17_rlog	noCre_HS_20_rlog	noCre_HS_3B_rlog	noCre_HS_3C_rlog	noCre_HS_4_rlog	noCre_HS_6_rlog	CamKIIaCX_1_rlog	CamKIIaCX_2_rlog	CamKIIaCX_3_rlog	CamKIIaHC_1_rlog	CamKIIaHC_2_rlog	CamKIIaHC_3_rlog	PV_1_rlog	PV_2_rlog	PV_3_rlog	GFAP_1_rlog	GFAP_2_rlog	GFAP_3_rlog	Cx3Cr1_1_rlog	Cx3Cr1_2_rlog	Cx3Cr1_3_rlog	noCre_rlog	CamKIIaCX_rlog	CamKIIaHC_rlog	PV_rlog	GFAP_rlog	Cx3Cr1_rlog	baseMean_CamKIIaCX_CamKIIaHC	log2FC_CamKIIaCX_CamKIIaHC	pvalue_CamKIIaCX_CamKIIaHC	padj_CamKIIaCX_CamKIIaHC	baseMean_CamKIIaCX_PV	log2FC_CamKIIaCX_PV	pvalue_CamKIIaCX_PV	padj_CamKIIaCX_PV	baseMean_CamKIIaCX_GFAP	log2FC_CamKIIaCX_GFAP	pvalue_CamKIIaCX_GFAP	padj_CamKIIaCX_GFAP	baseMean_CamKIIaCX_Cx3Cr1	log2FC_CamKIIaCX_Cx3Cr1	pvalue_CamKIIaCX_Cx3Cr1	padj_CamKIIaCX_Cx3Cr1	baseMean_CamKIIaHC_PV
ENSMUSG00000000001	Gnai3	6.7604	6.00207	5.60207	5.41562	6.41255	5.58997	6.51399	6.69749	6.53314	6.58989	5.92353	5.81455	5.76236	5.86244	5.99484	5.8732	5.90478	5.86809	5.78067	7.67614	7.58075	7.49396	7.9657	7.87625	7.73571	6.21172	5.83348	5.91016	5.85118	7.58361	7.85922	99.6579	-0.128985	0.529996	0.740204	82.2825	0.146665	0.525509	0.65739	337.614	-2.14076	2.6333e-40	3.78158e-39	346.721	-2.43361	1.3011e-53	1.6911e-52	59.4637
ENSMUSG00000000003	Pbsn	0	0	0	0	0	0	0	0	0	0	0	0	0	0	0	0	0	0	0	0	0	0	0	0	0	NA	NA	NA	NA	NA	NA	NA	NA	NA	NA	NA	NA	NA	NA	NA	NA	NA	NA	NA	NA	NA	NA	NA
ENSMUSG00000000028	Cdc45	1.25008	1.72917	0.835554	0.961443	0.796374	1.85161	1.90372	0.650724	0.609091	1.39236	1.52588	1.42381	1.63358	1.83649	1.47632	1.92265	1.21907	1.34525	1.66932	1.87813	1.6803	1.84732	2.20043	1.58047	1.31133	1.19801	1.52776	1.74515	1.41121	1.80191	1.69741	7.50154	-0.486493	0.486334	0.710082	4.88604	0.35752	0.677351	0.782815	9.06629	-0.356891	0.56394	0.642524	7.51095	-0.223165	0.757366	0.798901	4.19623
ENSMUSG00000000031	H19	-2.33276	-2.33744	-2.31979	-2.31453	-2.32266	-2.32611	-2.30896	-2.33524	-2.33942	-2.34006	-2.36174	-2.36181	-2.35607	-2.35064	-2.35771	-2.34203	-2.33396	-2.35428	-2.34458	-2.35629	-2.35479	-2.35886	-2.35019	-2.35128	-2.35014	NA	NA	NA	NA	NA	NA	NA	NA	NA	NA	NA	NA	NA	NA	NA	NA	NA	NA	NA	NA	NA	NA	NA
ENSMUSG00000000037	Scml2	-1.17503	-0.102666	-1.01693	-0.501453	-1.0519	-0.642563	-0.913789	-1.20522	-1.25617	-1.26407	-1.40031	-1.40414	-1.38407	-1.37194	-1.38728	-0.839692	-1.1897	-1.38034	-1.31909	-1.07761	-1.38141	-1.11196	-1.37082	-1.00326	-0.714143	-0.912978	-1.39617	-1.19964	-1.29638	-1.19033	-1.02941	0.369515	-2.05641	0.547498	NA	0	NA	NA	NA	0.347803	-2.08947	0.529723	NA	0.629364	-3.13826	0.247635	NA	0.22897
ENSMUSG00000000049	Apoh	-0.723358	-0.778194	-0.5714	-0.50976	-0.60501	-0.64539	-0.83556	-0.320917	-0.106364	-0.808938	-0.306689	-0.368626	-0.629249	-0.354699	-0.341088	-0.826824	-0.737465	-0.422397	-0.227957	-0.631587	-0.615099	-0.364026	-0.843549	-0.845431	-0.843474	-0.590489	-0.434854	-0.507537	-0.462606	-0.536904	-0.844152	2.05242	0.144925	0.913219	0.96795	1.82875	0.18807	0.892915	0.930916	2.31985	0.756043	0.54169	0.621729	1.26035	3.46592	0.0700223	0.101431	1.15052
ENSMUSG00000000056	Narf	5.43454	5.2778	4.94839	5.34046	6.07177	5.96668	5.73059	5.51137	5.76332	5.6278	5.97959	6.10847	6.20298	5.94496	5.85102	5.91275	6.66507	6.44338	6.53349	5.43177	5.45771	5.51727	6.22993	6.16775	5.98374	5.56727	6.09701	5.90291	6.54731	5.46892	6.12714	135.199	0.258172	0.16081	0.367436	157.948	-0.444737	0.0187349	0.0467689	139.476	1.13713	8.21759e-09	3.01386e-08	152.475	0.261356	0.163414	0.214504	101.887
ENSMUSG00000000058	Cav2	5.04935	4.84803	4.25995	3.97112	4.47104	4.43796	4.35211	4.10717	4.40217	4.22853	5.62403	5.62797	5.6801	4.44445	4.83402	3.97288	4.36794	4.18699	3.93262	6.76221	6.78636	7.09096	5.23036	5.36474	5.12012	4.41274	5.64403	4.41712	4.16252	6.87984	5.2384	79.9374	1.55818	4.53118e-09	9.35698e-08	66.0155	2.31705	4.37267e-14	5.98821e-13	284.343	-1.38239	8.63841e-16	4.86372e-15	106.326	0.855568	3.65862e-05	8.26297e-05	19.7793
ENSMUSG00000000078	Klf6	5.62074	6.12851	5.5922	6.09929	5.83894	6.30349	5.57729	5.40755	6.21445	5.83627	6.25013	6.22007	6.31593	5.52832	5.52871	5.66102	4.71496	4.6621	4.66264	5.66098	5.70976	5.82002	7.49093	7.31775	7.33864	5.86187	6.26204	5.57268	4.6799	5.73025	7.38244	128.324	0.96128	4.46239e-07	6.80375e-06	89.8112	2.51492	3.2109e-20	6.64529e-19	165.863	0.980702	4.88362e-08	1.69659e-07	310.796	-1.17364	4.27727e-16	1.82009e-15	36.3745
ENSMUSG00000000085	Scmh1	4.838	5.24041	4.64347	5.59382	5.37755	6.10582	5.02181	4.42377	5.53641	5.31679	4.5738	4.75009	4.85684	4.69292	4.65634	4.9924	5.10405	4.83594	4.54821	4.64677	4.20084	4.49294	5.39481	5.62926	5.38164	5.20978	4.72691	4.78055	4.8294	4.44685	5.46857	50.6818	-0.0764624	0.788818	0.902635	44.4867	0.0112771	0.972242	0.982196	52.0833	0.647186	0.0306321	0.0516418	74.2142	-0.763472	0.00182161	0.00343292	31.8511
ENSMUSG00000000088	Cox5a	8.02197	7.66244	8.23163	8.16817	7.7315	7.04451	8.18714	8.62783	8.21859	7.96205	8.79376	8.78998	8.99932	8.88513	8.90372	8.83377	9.8609	9.87115	9.94572	9.11284	9.02208	9.0158	8.31602	8.1257	8.15486	7.98558	8.86102	8.87421	9.89259	9.05024	8.19886	1010.89	-0.0333678	0.751769	0.880242	1481.97	-1.18968	7.21175e-22	1.6444e-20	1305.82	-0.00347675	0.978608	0.984699	808.575	1.2199	5.42762e-19	2.62515e-18	1034.51
ENSMUSG00000000093	Tbx2	-1.22025	-1.26842	-0.705677	-1.03262	-1.11629	-1.15176	-0.722717	-1.24574	-0.907681	-1.29543	-1.40639	-1.40887	-1.39569	-1.38752	-1.39783	-0.934527	-1.23265	-1.3932	-0.689195	-1.39598	-0.473979	-1.16639	-1.38676	-1.38858	-1.38669	-1.06666	-1.40365	-1.23996	-1.10501	-1.01212	-1.38734	0.369515	-2.05641	0.547498	NA	0.517534	-3.27712	0.372698	NA	1.16942	-3.80938	0.091749	0.13783	0	NA	NA	NA	0.588278
ENSMUSG00000000094	Tbx4	-1.75834	-2.08875	-2.01468	-1.99261	-2.02672	-2.04119	-2.12463	-2.07951	-2.09705	-2.09977	-2.18048	-2.18099	-2.01155	-2.14415	-2.17382	-2.108	-2.07417	-2.15945	-2.11871	-2.16785	-2.16155	-2.17864	-2.14225	-2.14685	-2.14207	-2.03232	-2.12434	-2.14199	-2.11744	-2.16935	-2.14372	0.170828	-0.0958564	0.981258	NA	0.153987	-0.379878	0.925828	NA	0.222919	0.67431	0.868747	NA	0.192188	0.26208	0.948789	NA	0
ENSMUSG00000000103	Zfy2	0	0	0	0	0	0	0	0	0	0	0	0	0	0	0	0	0	0	0	0	0	0	0	0	0	NA	NA	NA	NA	NA	NA	NA	NA	NA	NA	NA	NA	NA	NA	NA	NA	NA	NA	NA	NA	NA	NA	NA
ENSMUSG00000000120	Ngfr	0.662781	1.21218	0.915508	3.68769	2.21233	1.58524	0.417752	2.01653	2.42968	2.39897	0.686192	0.786895	0.254726	1.14733	0.230816	1.45093	3.62696	3.93105	3.66292	2.32524	2.8063	1.7903	1.61757	1.57344	0.347423	1.75387	0.575938	0.943028	3.74031	2.30728	1.17948	1.66605	-1.12254	0.480081	0.705983	23.1288	-5.55284	2.67071e-13	3.40188e-12	8.36339	-3.47971	0.000169823	0.000413183	2.19793	-1.55456	0.281456	0.344157	16.6178
ENSMUSG00000000125	Wnt3	1.92409	0.651508	1.04669	4.55213	2.71785	0.906047	2.51004	2.77218	2.95911	3.21772	0.101666	0.0570244	0.266475	0.371193	0.236456	1.15496	4.04979	4.50745	4.5498	2.45223	2.18847	2.91429	1.24219	1.46227	1.24374	2.32573	0.141722	0.587535	4.36901	2.51833	1.31606	0.369515	-2.05641	0.547498	NA	34.9774	-9.28057	3.92565e-14	5.40239e-13	8.09806	-6.62679	7.21939e-07	2.26907e-06	1.46568	-4.35875	0.0181509	0.0293993	24.6566
ENSMUSG00000000126	Wnt9a	2.31637	2.63991	0.715452	0.850136	2.57095	2.79947	2.41534	1.08665	1.61921	1.81244	2.17964	1.84693	2.15775	0.25843	0.533114	1.25518	0.473568	0.219902	0.32984	0.824236	1.25245	1.3756	0.263457	1.19242	0.697804	1.88259	2.06144	0.68224	0.341104	1.15076	0.717893	7.37653	3.18404	0.00184407	0.0119334	5.85448	5.33038	9.82828e-05	0.000436305	10.59	1.95394	0.00317285	0.00642201	8.14726	3.12214	0.000807663	0.00159198	0.555834
ENSMUSG00000000127	Fer	6.05166	6.10818	6.35392	5.2992	6.61788	6.42221	5.70319	6.36954	6.3671	5.85572	5.61181	5.75238	5.9778	6.19744	6.14647	6.23521	5.15251	5.66004	5.56924	6.43164	6.35094	6.29158	6.64685	6.60318	7.08584	6.11486	5.78066	6.19304	5.46059	6.35805	6.77863	126.032	-0.59406	0.00226591	0.0142038	75.178	0.560262	0.0478424	0.102717	162.117	-0.565414	0.00419165	0.00832416	177.875	-1.09556	8.99595e-07	2.32127e-06	67.3486
ENSMUSG00000000131	Xpo6	6.57433	6.66729	6.22533	7.45194	7.11047	6.99095	6.15219	6.22806	6.48552	6.37453	6.70494	6.67581	6.65313	6.64696	6.74756	6.56197	6.54463	6.44216	6.01622	6.01446	5.74985	5.86881	6.23036	6.53968	6.41183	6.62606	6.67796	6.65216	6.33434	5.87771	6.39396	214.553	0.00582224	0.969076	0.989322	161.648	0.619325	0.00378482	0.0115771	194.87	1.37635	1.95561e-14	1.0307e-13	197.344	0.69649	4.5709e-05	0.000102484	110.655
ENSMUSG00000000134	Tfe3	3.89509	4.8711	4.81142	5.46118	5.22608	5.58397	4.67546	4.73452	4.87408	4.62265	5.33058	5.50673	5.54283	5.02643	5.23171	5.21068	5.61769	5.48535	5.51205	5.58531	5.87481	5.95128	7.4799	7.54467	7.68748	4.87555	5.46005	5.15628	5.53837	5.8038	7.57068	76.5006	0.416431	0.0788565	0.229248	77.7915	0.0616149	0.796898	0.866002	124.404	-0.243949	0.253724	0.331345	323.762	-2.47557	1.63931e-55	2.24948e-54	46.9114
ENSMUSG00000000142	Axin2	5.44602	4.97118	5.01501	4.51096	4.76396	4.84324	4.54314	4.88205	5.06944	5.31146	4.19614	4.05872	4.30913	3.45834	3.54415	3.86501	4.08112	3.84404	4.33611	4.81695	4.86723	5.15664	2.59158	3.63137	2.75418	4.93565	4.18799	3.6225	4.08709	4.94694	2.99238	26.7878	0.905016	0.0220838	0.0892542	28.4095	0.309894	0.426688	0.567986	63.4305	-0.875671	0.00121356	0.00263638	23.9089	2.1532	2.40148e-05	5.5235e-05	14.7648
ENSMUSG00000000148	Brat1	4.27605	4.31228	2.31294	2.44717	4.52223	3.37942	3.45236	2.74067	3.33053	4.04704	4.08206	4.18819	3.91839	3.97666	4.14189	3.72593	3.58166	4.0739	3.60202	4.49713	4.61682	4.80253	4.8336	5.00172	5.11351	3.48207	4.06288	3.94816	3.75252	4.63883	4.98294	33.1885	0.121846	0.723803	0.866592	26.089	0.55106	0.182422	0.300865	56.9117	-0.575444	0.0372054	0.0617228	59.2625	-0.985436	0.00021872	0.00045885	16.9241
ENSMUSG00000000149	Gna12	4.3587	5.88725	5.82936	5.15859	5.72453	6.14915	6.43152	5.56275	5.99046	6.31866	3.97555	3.95952	3.40387	3.98193	3.81663	3.57359	3.92193	3.92377	3.59389	6.51764	6.52128	6.7923	7.09982	7.00095	7.36805	5.7411	3.77965	3.79072	3.81319	6.61041	7.15627	15.7905	0.0405807	0.935785	0.975256	13.518	0.224368	0.691848	0.793875	157.344	-3.74882	1.43457e-47	2.59111e-46	207.559	-4.38287	2.49583e-67	4.4226e-66	9.19949
ENSMUSG00000000154	Slc22a18	-0.743853	-0.804182	-0.576671	-0.508856	-0.613648	-0.658073	-0.874245	-0.775777	-0.829661	-0.396274	-0.741885	-0.766519	-0.896565	-0.885578	-0.899444	-0.863099	-0.759373	-0.893208	-0.475707	-0.154548	-0.421076	0.237837	0.372556	-0.350898	-0.139563	-0.678124	-0.801656	-0.882707	-0.709429	-0.112596	-0.0393017	0.188402	0.646029	0.872723	NA	0.429222	-0.674441	0.812543	NA	2.84027	-3.22287	0.0235838	0.0407488	2.77223	-3.38464	0.0189297	0.0305563	0.179654
ENSMUSG00000000157	Itgb2l	0	0	0	0	0	0	0	0	0	0	0	0	0	0	0	0	0	0	0	0	0	0	0	0	0	NA	NA	NA	NA	NA	NA	NA	NA	NA	NA	NA	NA	NA	NA	NA	NA	NA	NA	NA	NA	NA	NA	NA
ENSMUSG00000000159	Igsf5	-2.1997	-2.20952	-2.17248	-2.16144	-2.1785	-2.18573	-2.22746	-2.2049	-2.21367	-2.13732	-2.25704	-2.25717	-2.24862	-2.23723	-2.25206	-2.21915	-2.20223	-2.24488	-2.22451	-2.24908	-2.24593	-2.25448	-2.15856	-2.23858	-2.23619	-2.18907	-2.25428	-2.23615	-2.22387	-2.24983	-2.21111	0	NA	NA	NA	0	NA	NA	NA	0	NA	NA	NA	0.216226	-1.6615	0.683878	NA	0
ENSMUSG00000000167	Pih1d2	0.361239	0.893636	2.27203	0.716769	1.80483	1.67529	0.206409	0.952859	1.20771	0.271904	1.34508	0.915984	1.22506	1.08713	1.02957	0.249451	0.345973	1.14292	1.04305	2.06184	2.56045	2.53535	0.58419	1.24689	0.164896	1.03627	1.16204	0.788716	0.843982	2.38588	0.665324	3.72056	0.687896	0.502816	0.722189	3.28811	0.714207	0.512625	0.64509	15.4192	-2.00573	0.000271275	0.000642965	3.72917	1.3709	0.216028	0.273978	1.60363
ENSMUSG00000000168	Dlat	7.03533	7.10494	7.67058	7.13872	7.12847	7.53974	7.16098	6.96314	7.30633	7.02935	7.75249	7.77838	7.81464	7.87019	7.88586	7.9003	8.14508	8.27762	8.51316	7.91017	7.88428	7.96173	6.75711	6.81926	6.85807	7.20776	7.78184	7.88545	8.31195	7.91873	6.81148	496.212	-0.154588	0.160825	0.367436	525.663	-0.569209	0.000243542	0.000984618	599.141	0.0615159	0.613535	0.68761	348.627	1.67495	3.44377e-33	2.65409e-32	380.202
ENSMUSG00000000171	Sdhd	5.39794	4.442	4.85065	4.53984	5.06999	5.37619	5.15058	5.60702	5.20811	5.21062	5.71012	5.66891	5.51227	5.38236	5.27516	5.36089	6.40588	6.1932	5.92693	6.14601	6.42658	6.75409	5.88502	6.11399	5.98622	5.08529	5.63043	5.33947	6.17534	6.44223	5.99508	88.4405	0.42069	0.0556652	0.176658	115.266	-0.587638	0.0100083	0.0272894	187.43	-0.886895	6.15099e-05	0.000158387	122.282	-0.188194	0.340991	0.407343	72.2733
ENSMUSG00000000182	Fgf23	-2.20936	-2.21451	-2.19509	-2.1893	-2.19824	-2.20204	-2.22392	-2.21209	-2.21669	-2.2174	-2.23971	-2.23979	-2.23502	-2.22904	-2.19607	-2.21956	-2.21069	-2.23305	-2.22237	-2.19451	-2.23361	-2.23809	-2.22854	-2.22975	-2.2285	-2.20786	-2.23817	-2.21489	-2.22204	-2.22207	-2.22893	0.158755	-1.99693	0.624295	NA	0	NA	NA	NA	0.187841	-1.24927	0.759488	NA	0	NA	NA	NA	0.097895
ENSMUSG00000000183	Fgf6	0	0	0	0	0	0	0	0	0	0	0	0	0	0	0	0	0	0	0	0	0	0	0	0	0	NA	NA	NA	NA	NA	NA	NA	NA	NA	NA	NA	NA	NA	NA	NA	NA	NA	NA	NA	NA	NA	NA	NA
ENSMUSG00000000184	Ccnd2	5.09918	5.09089	6.11643	5.59041	5.7057	5.45907	5.9647	5.51244	5.14377	5.60591	5.60157	5.65293	5.45284	5.59504	5.58802	5.7097	3.5696	3.10611	2.97716	6.36418	6.42184	6.71671	5.07236	4.48955	3.94078	5.52885	5.56912	5.63092	3.21763	6.50091	4.5009	107.48	-0.0790944	0.69195	0.849068	49.5609	4.29261	3.53758e-16	5.63643e-15	203.91	-1.00438	1.14922e-07	3.86499e-07	76.4602	1.73092	3.57556e-07	9.52093e-07	36.1489
ENSMUSG00000000194	Gpr107	7.08439	6.63425	6.15945	7.2274	6.18227	6.75374	6.70526	6.8613	6.80194	6.66441	6.65604	6.78564	6.5548	6.58125	6.642	6.57073	6.90272	7.2719	7.25916	7.77508	7.90119	7.77917	7.53093	7.64312	7.70072	6.70744	6.66549	6.598	7.14459	7.81848	7.62492	181.166	0.0907792	0.582882	0.776756	205.327	-0.53535	0.00638747	0.0183694	425.026	-1.30939	2.2362e-18	1.42963e-17	316.502	-0.99059	5.80565e-11	1.94878e-10	138.681
ENSMUSG00000000197	Nalcn	8.52367	8.10074	7.80123	7.93171	8.25327	8.20053	7.93451	8.29342	8.06043	8.19021	8.21337	8.19139	8.30322	8.34469	8.32848	8.29778	7.89195	8.17523	8.39379	7.17689	7.08988	6.49492	6.14349	6.54643	6.42176	8.12897	8.23599	8.32365	8.15365	6.92056	6.37056	701.87	-0.134915	0.18758	0.404757	558.356	0.233037	0.186504	0.30605	543.492	2.03716	5.33347e-20	3.6422e-19	426.366	2.98955	3.60422e-69	6.63286e-68	404.758
ENSMUSG00000000202	Btbd17	3.65927	3.63298	1.7191	5.2484	3.72214	4.15507	3.58	3.64522	3.52422	3.7614	1.28183	0.961751	1.67361	0.814766	1.36422	1.05951	1.29735	1.74936	2.4039	7.45945	7.69718	8.04161	2.14105	3.06529	2.73728	3.66478	1.30573	1.0795	1.81687	7.73275	2.64787	1.3083	1.24087	0.481969	NA	2.38737	-0.90066	0.478429	0.615274	542.789	-8.86952	2.67269e-58	6.31544e-57	6.11728	-2.25975	0.00911331	0.0155383	1.23374
ENSMUSG00000000204	Slfn4	0	0	0	0	0	0	0	0	0	0	0	0	0	0	0	0	0	0	0	0	0	0	0	0	0	NA	NA	NA	NA	NA	NA	NA	NA	NA	NA	NA	NA	NA	NA	NA	NA	NA	NA	NA	NA	NA	NA	NA
ENSMUSG00000000214	Th	2.09633	1.90906	1.30131	5.00914	2.0272	3.36934	3.10854	2.73921	4.00757	3.15777	0.694443	0.628051	1.45802	0.629804	0.504161	0.802893	4.66246	3.66559	3.25585	3.08723	3.37156	2.31556	1.68086	1.83789	1.88501	2.87255	0.92684	0.645619	3.8613	2.92478	1.80125	0.700887	2.35045	0.311731	NA	23.3501	-5.37655	2.57328e-10	2.47236e-09	12.2574	-3.88356	5.88291e-06	1.69053e-05	3.10147	-1.7325	0.130645	0.176399	15.9422
ENSMUSG00000000215	Ins2	0	0	0	0	0	0	0	0	0	0	0	0	0	0	0	0	0	0	0	0	0	0	0	0	0	NA	NA	NA	NA	NA	NA	NA	NA	NA	NA	NA	NA	NA	NA	NA	NA	NA	NA	NA	NA	NA	NA	NA
ENSMUSG00000000216	Scnn1g	-0.643944	-0.72273	-0.425621	-0.337061	-0.47391	-0.531925	-0.332022	-0.685635	-0.756002	-0.7669	-0.881483	-0.888672	-0.512962	-0.420567	-0.117825	-0.78743	1.06665	0.518935	1.29471	-0.516412	-0.0381671	-0.555747	-0.827768	-0.432131	-0.82758	-0.567575	-0.761039	-0.441941	0.9601	-0.370109	-0.695826	0.878753	-2.64356	0.234763	NA	6.3608	-5.76313	4.33835e-05	0.000204628	1.1764	-2.55009	0.195637	0.266752	0.394123	-0.69971	0.830903	NA	4.77422
ENSMUSG00000000223	Drp2	7.88813	6.98087	6.35903	6.90144	6.43882	6.86065	6.98317	6.94584	6.61932	6.71168	6.97967	6.84369	6.89894	6.59348	6.52656	6.48307	4.57654	4.93554	4.69763	6.49024	6.48751	6.89883	4.3976	4.94044	4.63738	6.86889	6.90744	6.53437	4.73657	6.62553	4.65847	240.723	0.484524	0.000896418	0.00644517	139.283	3.28282	1.08393e-34	4.47504e-33	303.452	0.603183	0.000973806	0.00214637	171.899	3.61017	9.50832e-48	1.0623e-46	70.3617
ENSMUSG00000000244	Tspan32	-1.07445	-1.1559	-0.848748	-0.757196	-0.898669	-0.314307	-1.23719	-1.11755	-1.19029	-1.19877	-1.30984	-1.3172	-1.28004	-1.25912	-1.28576	-1.21146	-1.0954	-1.2735	-1.22804	-0.918335	-1.27537	-0.957776	0.322795	0.365768	0.339765	-0.979308	-1.30236	-1.25212	-1.19898	-1.05049	0.342776	0	NA	NA	NA	0	NA	NA	NA	0.347803	-2.08947	0.529723	NA	8.60395	-6.91136	1.45711e-07	3.98712e-07	0
ENSMUSG00000000247	Lhx2	5.26365	5.10857	4.83364	2.63305	4.78537	4.94339	4.4443	3.91125	4.22268	4.04161	5.1585	4.90282	4.88371	4.27062	4.80698	4.53083	2.09569	2.53721	2.22682	6.69645	6.94481	6.98214	2.97475	3.5526	2.97658	4.41875	4.98167	4.53614	2.28658	6.87447	3.16798	62.4694	0.562428	0.0401663	0.13878	34.7144	4.86701	2.28893e-11	2.48297e-10	274.08	-2.20014	4.19346e-33	4.73519e-32	47.5742	3.01763	2.51225e-14	9.89632e-14	16.0444
ENSMUSG00000000248	Clec2g	-2.33583	-2.33854	-2.32829	-2.32524	-2.32996	-2.33196	-2.34351	-2.33726	-2.33969	-2.34007	-2.35258	-2.3526	-2.34936	-2.34621	-2.35032	-2.34121	-2.33653	-2.34833	-2.34269	-2.32799	-2.34862	-2.35099	-2.34595	-2.34658	-2.34592	-2.33504	-2.35151	-2.34591	-2.34251	-2.34253	-2.34615	0	NA	NA	NA	0	NA	NA	NA	0.187841	-1.24927	0.759488	NA	0	NA	NA	NA	0
ENSMUSG00000000253	Gmpr	6.39233	6.04485	6.44358	6.38194	6.10417	5.44957	6.14856	6.29902	6.17042	6.03628	6.50656	6.42055	6.35967	7.29786	7.28066	7.03835	6.32576	6.28066	6.16938	6.11563	6.29843	6.5486	6.7936	6.70614	7.00842	6.14707	6.42893	7.20562	6.2586	6.32089	6.83605	268.519	-1.08183	1.16682e-13	3.87526e-12	137.463	0.40656	0.0343593	0.0781815	199.062	0.3826	0.0474317	0.0767252	214.41	-0.249728	0.143657	0.191847	153.775
ENSMUSG00000000263	Glra1	2.03397	2.71626	2.408	5.10786	5.33333	5.9666	5.31401	6.85814	5.94674	6.33722	2.76609	2.91102	2.97186	1.94356	1.42394	2.53574	6.65887	7.05624	7.21363	4.14115	3.94781	3.94207	4.0669	4.24767	3.97603	4.80221	2.88299	1.96775	6.97625	4.01034	4.09687	5.20346	2.4982	0.0210903	0.0862799	187.061	-5.60573	5.66152e-69	6.73481e-67	21.7216	-1.56322	0.000293263	0.000692036	19.4688	-1.62834	0.000258846	0.0005378	128.561
ENSMUSG00000000266	Mid2	5.70606	5.34858	5.20331	6.03545	5.05303	4.96503	5.74812	5.98332	5.5338	5.36135	5.01318	5.22621	5.05127	4.76881	4.56008	4.79995	5.72939	5.52009	5.36923	5.9461	6.09664	6.0144	3.48576	4.41276	3.94189	5.4938	5.09689	4.70962	5.53957	6.01905	3.9468	55.3387	0.589619	0.033203	0.120429	71.371	-0.450848	0.0790936	0.154888	130.884	-1.02349	3.16793e-07	1.02367e-06	46.4223	2.02212	5.13635e-08	1.44875e-07	42.8853
ENSMUSG00000000275	Trim25	2.87258	3.68963	3.92101	3.77492	2.27991	2.93513	3.31358	3.39831	2.91349	2.02248	1.4643	1.35678	1.42251	1.86303	1.3662	1.04011	1.24013	1.48499	0.979046	3.99898	4.32362	4.26845	5.71892	5.59471	5.24014	3.1121	1.41453	1.42311	1.23472	4.19702	5.51792	2.10775	0.0200129	0.987779	0.99431	1.29475	1.20778	0.485978	NA	31.1943	-4.37366	4.72741e-15	2.57297e-14	83.0753	-6.03653	1.52674e-31	1.11604e-30	0.83564
ENSMUSG00000000276	Dgke	7.5656	7.51741	7.11684	7.59457	7.1987	7.41532	7.55705	7.77989	7.53594	7.49188	7.48865	7.55546	7.45676	7.31566	7.40719	7.5032	7.52304	7.53673	7.82801	6.41828	6.29256	5.96613	5.45333	5.89364	5.673	7.47732	7.50029	7.40868	7.62926	6.22566	5.67332	384.475	0.116129	0.354073	0.595693	363.613	-0.0279309	0.863729	0.91077	323.618	2.03301	3.58926e-27	3.28874e-26	254.251	2.96147	1.03579e-51	1.27975e-50	242.454
ENSMUSG00000000278	Scpep1	4.97101	5.43342	3.68867	5.95414	5.26904	5.17131	4.58135	4.35218	4.75457	5.02079	5.09861	5.09097	5.0658	4.35356	4.02206	4.50437	6.08474	5.82163	5.83536	6.99401	7.095	7.14876	8.01697	8.27627	8.31435	4.91965	5.08512	4.29333	5.91391	7.07926	8.20253	41.4636	1.25863	0.000142092	0.00128932	79.0379	-0.992614	2.53071e-05	0.000124208	244.22	-2.45429	1.25277e-46	2.20186e-45	488.757	-3.80091	2.56039e-117	1.21122e-115	44.8167
ENSMUSG00000000282	Mnt	2.95928	4.14244	3.07938	2.61582	4.24285	5.1541	4.85222	2.86547	4.25257	3.93045	4.574	4.38922	4.25556	4.08143	4.31574	3.9854	4.14825	4.01083	4.43882	4.21764	4.66231	4.74157	5.58993	5.42199	5.82305	3.80946	4.40626	4.12752	4.1993	4.54051	5.61165	39.3077	0.375219	0.245253	0.480291	34.9606	0.47476	0.188521	0.30853	57.5898	0.0406354	0.88994	0.918808	90.3092	-1.34868	3.09442e-08	8.85494e-08	20.7725
ENSMUSG00000000290	Itgb2	1.35511	2.99233	3.70723	5.50418	5.28401	5.00901	2.36305	2.64886	2.88967	2.6558	3.16998	1.73261	0.635828	0.79654	0.588582	1.06181	1.31678	0.68795	0.982141	1.87398	1.47613	1.75634	11.8076	9.79849	12.106	3.44092	1.84614	0.815644	0.995625	1.70215	11.2374	3.45038	4.71424	0.220116	0.448532	3.12521	4.43371	0.249121	0.382176	6.29525	1.35499	0.194762	0.265715	3539.87	-9.79423	4.71793e-16	2.00112e-15	0
ENSMUSG00000000295	Hddc2	2.63221	3.96885	3.77644	3.27098	4.07149	4.72761	4.31626	3.7609	4.42246	4.0786	4.38991	4.21839	4.60422	4.42389	4.68958	4.0486	3.82156	3.51397	3.85406	5.52981	5.69025	5.28667	4.47751	4.04334	4.66719	3.90258	4.40417	4.38736	3.72986	5.50224	4.39602	45.3515	-0.0841878	0.787973	0.902424	29.217	1.2341	0.00265486	0.00847045	100.893	-1.30135	1.52715e-07	5.08053e-07	46.228	0.283708	0.384498	0.451375	20.2654
ENSMUSG00000000296	Tpd52l1	2.94993	4.28915	5.68613	2.60579	4.38838	4.07107	3.91676	4.08319	3.87422	3.74873	5.08778	5.12122	5.01283	5.30909	5.21348	5.42494	3.15813	4.00945	4.10534	5.26363	5.27238	5.25568	3.08039	2.65759	3.18415	3.96134	5.07394	5.31584	3.75764	5.2639	2.97404	96.6396	-0.327622	0.11362	0.291995	48.138	1.86411	1.05062e-07	7.37008e-07	111.183	-0.00459704	0.981645	0.986753	52.0845	3.58847	1.77849e-18	8.39823e-18	40.198
ENSMUSG00000000301	Pemt	-0.0381692	-0.0719002	0.194149	0.295452	0.138911	0.0725481	-0.125282	0.509355	-0.0852324	-0.0894741	0.591468	0.789604	0.650278	0.451684	0.462529	0.361458	-0.0471213	0.833739	0.310388	1.30313	1.4316	1.26676	0.828592	0.932834	0.208204	0.0800357	0.677116	0.425224	0.365669	1.33383	0.656543	3.47042	0.703369	0.496836	0.717521	2.97364	0.663776	0.564394	0.690645	9.22489	-1.16831	0.0636488	0.0998134	4.53091	0.230184	0.797361	0.832559	1.51917
ENSMUSG00000000303	Cdh1	1.88308	3.38912	1.00178	3.96952	1.78878	2.99998	2.57563	1.3509	0.585266	2.76003	0.711306	0.391128	0.268101	0.364335	0.240746	0.53182	4.33562	3.66523	4.07881	1.86499	3.58415	1.14919	1.21653	1.43302	1.68669	2.23041	0.456845	0.378967	4.02656	2.19944	1.44541	0.289905	1.17788	0.727937	NA	27.7534	-6.49547	2.70989e-12	3.20732e-11	10.0465	-4.51886	0.000185864	0.000449665	2.22236	-2.39252	0.0845628	0.120347	19.2397
ENSMUSG00000000305	Cdh4	4.93952	5.6823	4.88807	5.2825	5.81041	5.56782	5.22424	4.74931	4.839	5.48528	5.35198	5.31343	5.15419	4.26039	4.50545	4.40009	3.93785	4.23127	4.01828	6.02146	6.2259	6.1566	3.68744	3.94692	3.61452	5.24684	5.2732	4.38864	4.06247	6.13465	3.74963	60.5044	1.27049	4.07328e-06	5.19906e-05	48.5241	1.92368	1.41085e-08	1.11321e-07	161.263	-0.90713	1.06886e-06	3.3035e-06	56.1875	2.6458	2.5862e-15	1.06316e-14	17.7698
ENSMUSG00000000308	Ckmt1	10.232	9.28115	9.32097	9.05504	9.29841	8.87576	10.0888	9.84176	9.50824	9.94459	9.05448	9.06161	8.98557	9.14049	9.09737	9.11284	8.84044	8.6261	8.32878	7.06886	6.98377	6.74486	6.87519	7.64734	7.22541	9.54467	9.03388	9.1169	8.59844	6.9325	7.24932	1182.12	-0.122916	0.175309	0.387258	820.3	0.733249	3.74416e-05	0.000178582	810.285	3.33821	1.8669e-95	9.897e-94	730.073	2.8168	2.86073e-35	2.34104e-34	596.905
ENSMUSG00000000317	Bcl6b	0.453129	0.0443901	-0.523297	-0.452678	-0.561803	-0.608065	-0.175758	-0.730636	-0.328154	-0.795439	-0.428889	-0.591445	-0.590448	-0.839253	-0.854294	-0.376494	-0.218807	-0.847523	-0.822889	-0.233187	-0.366245	-0.441607	-0.838145	-0.840794	-0.83804	-0.367831	-0.536927	-0.690014	-0.62974	-0.347013	-0.838993	1.01865	1.33184	0.501842	NA	1.04551	1.01396	0.608747	NA	2.13355	-0.581129	0.64126	0.712812	0.73507	2.66948	0.235134	NA	0.552351
ENSMUSG00000000318	Clec10a	1.65064	0.0772513	2.70629	0.745333	1.50178	1.9624	1.04831	1.53591	0.0247735	0.00752138	-0.14289	-0.244027	-0.419439	-0.275685	-0.462242	-0.044875	1.05181	0.997429	1.11113	-0.425136	0.974328	0.0992749	7.63158	6.45013	6.09382	1.12602	-0.268785	-0.260934	1.05346	0.216155	6.72518	0.188402	0.646029	0.872723	NA	1.60402	-2.88798	0.0778264	0.152897	1.0111	-1.45114	0.46939	0.553812	135.1	-9.07876	2.65161e-18	1.24429e-17	1.00202
ENSMUSG00000000320	Alox12	-1.23159	-0.900232	-1.09872	-1.04483	-1.12811	-0.784116	-1.36709	-0.498358	-0.571709	-0.927112	-1.41765	-1.4201	-1.14583	-1.39895	-1.40917	-1.3265	-1.24392	-1.40458	-1.35266	-1.40734	-1.40529	-1.41057	-1.3982	-1.08399	-1.06798	-0.955187	-1.32786	-1.37821	-1.33372	-1.40773	-1.18339	0.170828	-0.0958564	0.981258	NA	0.153987	-0.379878	0.925828	NA	0.222919	0.67431	0.868747	NA	0.607837	-1.58298	0.539084	NA	0
ENSMUSG00000000325	Arvcf	5.84989	4.94407	4.76114	4.28055	5.04709	4.44416	5.48165	5.30808	5.21429	5.64315	4.97882	4.79814	4.69974	4.90147	4.48272	4.40044	4.28098	3.90724	3.20949	4.37903	4.94152	4.85524	6.09397	6.04613	6.30927	5.09741	4.82557	4.59488	3.79924	4.72526	6.14979	50.0199	0.300974	0.30899	0.551188	32.8854	1.74306	6.58517e-05	0.000302474	63.9548	0.374388	0.191713	0.262191	120.432	-1.50012	1.45232e-12	5.29223e-12	19.342
ENSMUSG00000000326	Comt	6.46308	6.72365	7.2905	7.02618	6.76749	6.67699	6.46378	6.51727	6.52194	6.62846	7.50282	7.38739	7.44091	7.27856	6.91161	6.97209	7.86865	7.50949	7.27092	7.36036	7.37306	7.58142	8.72669	8.88333	8.9809	6.70793	7.44371	7.05409	7.54969	7.43828	8.86364	309.186	0.509531	0.000653782	0.00490767	330.662	-0.00368903	0.985612	0.991759	435.577	0.248937	0.0861204	0.130298	808.076	-1.55348	5.66839e-34	4.48714e-33	195.317
ENSMUSG00000000339	Rtca	6.43688	6.78603	6.2547	6.69025	6.48755	5.81737	6.68011	7.05527	6.68689	6.80101	6.77638	6.7245	6.89262	6.63853	6.59738	6.84101	7.15124	6.94735	6.81987	6.37218	6.1595	6.37239	6.16323	5.97615	6.33005	6.56961	6.79783	6.69231	6.97282	6.30136	6.15648	226.495	0.138386	0.36776	0.608654	220.468	-0.0767135	0.664412	0.772585	234.525	0.930072	4.99999e-08	1.73628e-07	191.684	1.20028	7.22307e-11	2.41223e-10	146.381
ENSMUSG00000000340	Dbt	6.19071	5.5486	5.84318	5.99581	5.74803	6.24131	5.58382	6.13987	5.59107	5.82597	4.71348	4.56808	4.62267	4.8003	5.11996	5.05986	4.97023	5.7918	5.393	7.06981	7.07958	7.34919	6.54331	6.32827	6.6116	5.87084	4.63474	4.99337	5.38501	7.16619	6.49439	41.8824	-0.586078	0.0550407	0.174924	46.6099	-1.10941	0.00159924	0.00539592	241.348	-3.32951	3.40081e-60	8.4134e-59	117.965	-2.38227	7.192e-27	4.56285e-26	37.4617
ENSMUSG00000000346	Dazap2	5.16699	6.18914	4.39166	6.10407	5.60025	5.80497	4.98581	5.11122	5.82684	5.59524	5.95652	5.98661	5.78679	5.59347	5.71029	5.76243	6.95414	6.61377	6.50777	8.31431	8.36923	8.61601	8.32542	8.31467	8.36293	5.47762	5.90997	5.68873	6.69189	8.43318	8.33434	94.9271	0.32743	0.125898	0.31275	139.307	-0.917213	3.09076e-05	0.000149759	654.546	-3.08527	1.56038e-82	6.51609e-81	503.866	-2.88625	1.40854e-98	4.6615e-97	90.3733
ENSMUSG00000000355	Mcts1	6.1593	6.1762	7.22052	6.8154	5.51758	5.26537	6.37884	6.05941	5.75704	5.94376	7.23443	7.44873	7.6182	7.62734	7.73309	7.90665	6.68648	7.43471	7.72629	7.1719	6.90678	6.88229	7.31826	7.21173	7.14234	6.12934	7.43379	7.75569	7.28249	6.98699	7.22411	473.783	-0.432032	0.00243834	0.0150732	333.143	0.253453	0.385	0.527552	408.241	0.849837	3.52028e-06	1.03417e-05	377.897	0.597184	0.00030691	0.000633899	273.356
ENSMUSG00000000359	Rem1	-1.70493	-1.33537	-1.63584	-1.60781	-1.65112	-1.66948	-1.57815	-1.71812	-1.74039	-1.74384	-1.82397	-1.82467	-1.82083	-1.80018	-1.82148	-1.75429	-1.71134	-1.8196	-1.76789	-1.64956	-1.63702	-1.82192	-1.79776	-1.8036	-1.60029	-1.63851	-1.82315	-1.79198	-1.76628	-1.70283	-1.73389	0	NA	NA	NA	0	NA	NA	NA	0.389733	-2.2216	0.48786	NA	0.213715	-1.6615	0.683878	NA	0
ENSMUSG00000000365	Rnf17	0.750376	2.12285	3.3069	1.08689	0.915174	3.14761	1.33998	2.21558	2.37436	1.53421	1.33214	1.90191	2.06746	1.19741	1.72699	1.93525	0.731469	2.49198	1.8341	0.783472	0.452913	0.969183	2.55796	2.27817	2.32956	1.87939	1.76717	1.61988	1.68585	0.735189	2.38856	6.76034	0.296676	0.702219	0.854315	6.66934	-0.177505	0.842626	0.896872	5.33957	3.15523	0.00513829	0.0100525	11.1513	-0.766193	0.198258	0.253668	4.20107
ENSMUSG00000000374	Trappc10	7.43782	7.08987	7.43443	7.52341	7.80142	7.47394	7.63082	7.81692	7.63116	7.79056	7.1613	7.05852	7.0677	6.90099	7.05997	6.89564	7.11504	6.96451	6.82952	7.07194	6.89378	7.0799	7.04403	7.14816	7.02912	7.56304	7.09584	6.9522	6.96969	7.01521	7.07377	247.168	0.179558	0.218891	0.447067	213.533	0.350287	0.0428511	0.0938672	305.457	0.359302	0.0196974	0.0345494	266.429	0.343498	0.019788	0.0318212	137.34
ENSMUSG00000000378	Ccm2	5.81963	4.9261	5.89864	5.062	6.00414	4.97845	4.48323	4.5825	4.82175	4.99683	4.62141	4.65008	4.33671	4.78147	4.57972	4.17824	5.2467	4.75802	4.50919	4.48906	4.61571	4.86728	6.16333	6.02588	6.07506	5.15733	4.53607	4.51314	4.83797	4.65735	6.08809	39.9665	-0.0199055	0.951183	0.980831	40.9436	-0.272842	0.448226	0.588124	50.9346	0.0754184	0.799731	0.846713	104.995	-1.84038	8.01236e-17	3.53257e-16	28.3587
ENSMUSG00000000381	Wap	0	0	0	0	0	0	0	0	0	0	0	0	0	0	0	0	0	0	0	0	0	0	0	0	0	NA	NA	NA	NA	NA	NA	NA	NA	NA	NA	NA	NA	NA	NA	NA	NA	NA	NA	NA	NA	NA	NA	NA
ENSMUSG00000000384	Tbrg4	5.15192	5.22352	5.00446	3.02091	4.48389	5.35806	5.03159	5.27146	5.33575	5.11493	5.35116	5.04908	5.18204	5.09446	4.87285	4.34946	5.45008	5.21078	5.25658	4.60783	4.90846	4.81171	4.83285	4.74973	4.78368	4.89965	5.19409	4.77225	5.30581	4.776	4.78875	67.0536	0.502502	0.0640556	0.196627	71.9209	0.0252526	0.922456	0.951257	80.5969	0.852151	0.000671073	0.00151197	69.0163	0.906186	0.000451361	0.000914507	41.9706
ENSMUSG00000000385	Tmprss2	-2.07007	-2.08873	-2.01834	-1.99736	-2.02978	-2.04353	-2.12282	-2.07994	-2.09661	-2.0992	-2.17564	-2.1761	-2.16303	-2.14137	-2.16957	-2.10702	-1.77954	-2.15591	-2.1172	-2.01623	-2.15791	-2.17415	-2.13956	-2.14394	-2.13939	-2.06464	-2.17159	-2.13932	-2.01755	-2.1161	-2.14096	0	NA	NA	NA	0.917219	-3.86752	0.21193	NA	0.187841	-1.24927	0.759488	NA	0	NA	NA	NA	0.646762
ENSMUSG00000000386	Mx1	-1.23526	-1.27182	-1.13394	-1.09285	-1.15635	-1.18327	-1.33859	-1.2546	-0.998023	-1.29231	-1.36904	-1.37027	-1.1697	-1.35931	-1.36469	-1.30763	-1.24466	-1.36229	-1.32758	-1.36374	-0.993314	-1.19417	-0.758347	-0.650885	-1.1089	-1.1957	-1.303	-1.34388	-1.31151	-1.18374	-0.839377	0.170828	-0.0958564	0.981258	NA	0.153987	-0.379878	0.925828	NA	0.786666	-1.79691	0.447633	0.533107	1.86232	-3.58664	0.0384223	0.0586328	0
ENSMUSG00000000392	Fap	2.54896	2.00095	0.838156	0.972104	3.02574	2.23443	1.23561	2.43591	1.92102	1.42273	1.91419	1.88082	2.02692	0.422116	0.910252	1.61339	1.62932	1.36964	0.958724	1.14095	1.18628	0.34675	1.66514	1.08085	1.33331	1.86356	1.94065	0.98192	1.31923	0.891326	1.35977	6.49339	2.07142	0.0232713	0.0927055	6.36394	1.43521	0.085128	0.164389	7.77466	2.55704	0.00256167	0.00527186	7.85438	1.43007	0.0486447	0.072922	2.13489
ENSMUSG00000000394	Gcg	-2.13127	-2.13813	-2.11226	-2.10455	-2.11646	-2.12152	-2.15066	-2.1349	-2.14103	-2.14198	-2.16979	-2.13778	-2.16544	-2.15748	-2.16784	-2.14485	-2.13304	-2.16282	-2.14859	-2.11148	-2.10928	-2.16944	-2.15681	-2.15842	-2.15675	-2.12928	-2.15767	-2.15672	-2.14815	-2.13007	-2.15733	0.0868986	-0.0958564	0.981258	NA	0.0784542	-0.379878	0.925828	NA	0.502718	-1.25137	0.643802	NA	0.098018	0.26208	0.948789	NA	0
ENSMUSG00000000399	Ndufa9	8.76786	8.27077	8.09323	8.44514	8.25791	8.47333	8.56457	8.68812	8.34907	8.74111	8.19378	8.24657	8.16392	8.0936	8.0794	8.09822	8.46812	8.49344	8.13313	8.26573	8.25105	8.5244	8.20079	8.31511	8.23864	8.46511	8.20142	8.09041	8.3649	8.34706	8.25152	541.859	0.14624	0.180277	0.394237	529.016	-0.0807494	0.621872	0.738951	731.408	0.0382938	0.787446	0.837617	593.462	0.243076	0.039174	0.0597105	349.218
ENSMUSG00000000402	Egfl6	3.34988	3.10406	3.31523	3.28538	2.0348	1.1418	2.06478	2.00019	2.72621	2.33319	0.270506	0.981081	0.450797	3.10011	2.78896	3.63061	0.950469	1.87506	2.31423	5.44795	5.18455	5.00051	1.07036	0.550472	1.0717	2.53555	0.567461	3.17323	1.71325	5.211	0.89751	12.9478	-5.25293	1.19899e-07	1.99613e-06	2.29157	-3.02262	0.0720116	0.144116	86.319	-7.64967	1.7328e-18	1.11259e-17	0.723994	-0.419379	0.861017	NA	9.26431
ENSMUSG00000000409	Lck	-1.13574	-1.19127	-0.981847	-0.480088	-0.57655	-1.05678	-1.29269	-1.16513	-1.21473	-1.22241	-0.315885	-0.914429	-1.33183	-0.703713	-1.33476	-0.812598	-1.15003	-1.32843	-1.27597	-0.824429	-1.02147	-1.0746	-1.31972	-1.32218	-1.31962	-1.03172	-0.854049	-0.950357	-1.25148	-0.973499	-1.32051	2.00706	0.669228	0.66136	0.829071	1.06337	2.89754	0.232895	NA	2.26878	1.12056	0.424821	0.511276	1.33459	3.55096	0.0973307	0.136265	0.513609
ENSMUSG00000000411	Tssk3	-1.88943	-1.90237	-1.85358	-1.83904	-1.86151	-1.87104	-1.926	-1.89628	-1.90783	-1.90962	-1.95482	-1.95501	-1.95387	-1.93885	-1.78043	-1.91504	-1.89276	-1.94893	-1.9221	-1.95399	-1.67133	-1.95425	-1.9376	-1.94063	-1.93748	-1.88567	-1.95456	-1.87811	-1.92126	-1.85985	-1.93857	0.31751	-2.58466	0.471294	NA	0	NA	NA	NA	0.605677	-2.85555	0.357479	NA	0	NA	NA	NA	0.19579
ENSMUSG00000000416	Cttnbp2	7.13139	7.60346	7.85845	7.92088	7.83199	7.47379	6.94126	6.86896	7.26815	6.96985	7.05245	7.05803	6.96765	7.57932	7.65681	7.63725	7.12602	7.32958	7.23459	6.17918	5.99545	5.81049	5.36377	5.77353	5.41496	7.38682	7.02604	7.62446	7.23007	5.99504	5.51742	367.298	-0.8175	3.10601e-11	8.08285e-10	250.695	-0.136529	0.38333	0.525829	225.685	1.72336	6.31073e-20	4.30057e-19	176.038	2.53076	1.1144e-32	8.46033e-32	236.083
ENSMUSG00000000420	Galnt1	6.58707	6.4574	6.5982	6.79188	6.40283	6.92903	6.56377	7.28852	6.5567	6.85431	6.20639	6.22522	6.27209	6.35727	5.97353	6.60025	6.93162	7.20967	7.57959	8.36917	8.41415	8.41513	8.39033	8.64825	8.57898	6.70297	6.23457	6.31035	7.24029	8.39948	8.53919	124.031	-0.130009	0.547096	0.754952	184.072	-1.32841	1.10264e-08	8.84952e-08	574.114	-2.71309	1.21628e-90	6.01798e-89	535.719	-2.83342	1.36108e-86	3.67772e-85	132.151
ENSMUSG00000000435	Myf5	0	0	0	0	0	0	0	0	0	0	0	0	0	0	0	0	0	0	0	0	0	0	0	0	0	NA	NA	NA	NA	NA	NA	NA	NA	NA	NA	NA	NA	NA	NA	NA	NA	NA	NA	NA	NA	NA	NA	NA
ENSMUSG00000000439	Mkrn2	4.17215	4.51136	3.97131	2.90108	5.4872	5.04	4.39109	4.15536	4.68435	4.3778	4.7539	4.7948	4.71974	4.31787	4.90319	4.68312	5.61055	5.05945	4.96244	5.23617	5.13641	5.41254	5.16899	5.07258	4.91342	4.36917	4.75615	4.63473	5.21081	5.26171	5.05166	52.1449	0.112075	0.697738	0.852579	60.5292	-0.489237	0.102535	0.19119	84.8808	-0.477968	0.0375136	0.062166	64.2419	-0.116413	0.639929	0.695323	40.5552
ENSMUSG00000000440	Pparg	1.70903	2.02431	0.912815	1.03557	2.39328	2.25228	1.85695	1.89653	1.4906	1.72051	2.1881	2.06	2.29715	1.16349	0.987461	0.626599	1.94439	1.55475	1.03243	1.70624	1.53753	1.703	1.1756	1.14648	1.5556	1.72919	2.18175	0.925851	1.51053	1.64892	1.29256	7.4881	2.91729	0.00190295	0.0122377	8.45679	1.4547	0.0518989	0.10998	12.348	1.25852	0.0253143	0.0434217	9.27393	2.15799	0.00305219	0.00557722	2.16245
ENSMUSG00000000441	Raf1	6.54937	6.26958	6.34583	7.30311	6.85809	7.07691	6.70611	6.72564	6.83097	6.85528	5.81868	5.82191	5.53886	5.87522	5.93747	6.03842	6.31676	6.43053	6.16023	6.30547	6.15556	6.5256	6.38413	6.51486	6.50282	6.75209	5.72648	5.95037	6.30251	6.32887	6.46727	98.574	-0.310207	0.144486	0.342418	102.104	-0.664821	0.00437866	0.0131952	144.37	-0.613593	0.00423905	0.00840602	131.732	-0.724895	0.000261131	0.000542476	77.7576
ENSMUSG00000000486	2001-09-01	-0.359635	0.704249	-0.144983	-0.0579122	-0.19246	-0.249499	0.216969	-0.400625	-0.434134	0.0495842	-0.523661	-0.529231	-0.499998	-0.482271	-0.043727	-0.44673	0.5505	-0.196626	-0.0373642	0.529837	0.338788	0.344047	0.475788	0.805863	-0.133363	-0.0868446	-0.51763	-0.324243	0.105503	0.404224	0.382763	0.31751	-2.58466	0.471294	NA	1.32846	-4.40591	0.0349175	0.0791795	2.73443	-5.05024	0.00124662	0.00270065	2.49216	-5.12679	0.00230599	0.00428577	1.12865
ENSMUSG00000000489	Pdgfb	3.95045	3.47488	4.23181	2.28558	3.13557	3.2909	3.61658	2.88066	3.70586	3.76345	4.12205	4.17555	4.02504	3.92673	4.02119	3.82252	3.16028	2.43198	3.2433	2.79092	3.10443	2.10392	6.5351	6.61033	6.56149	3.43357	4.10755	3.92348	2.94519	2.66642	6.56897	34.9868	0.234037	0.478564	0.704804	21.818	2.0063	0.000100932	0.000447218	29.4912	2.42456	6.56524e-08	2.25678e-07	183.172	-2.89912	8.68849e-55	1.16783e-53	13.1351
ENSMUSG00000000530	Acvrl1	4.43651	3.89949	4.0554	3.64261	4.71808	4.67826	3.5198	4.41562	3.93809	4.14606	2.80991	2.87303	2.71248	1.10004	1.31208	1.29376	2.06716	2.50066	1.23414	2.41199	2.07027	2.18613	5.4907	5.55734	5.4205	4.14499	2.79847	1.23529	1.93399	2.2228	5.48951	5.88117	4.49098	0.000781803	0.00572553	6.69673	1.59342	0.0726102	0.144921	10.5401	1.28327	0.0345571	0.0577354	78.5721	-3.45602	2.70875e-33	2.09274e-32	1.16639
ENSMUSG00000000531	Grasp	3.33154	4.77693	4.61089	2.46805	4.17659	3.11642	4.80593	4.19279	4.57671	4.22011	5.90017	5.80366	5.63311	5.91154	5.81372	5.60449	1.94314	3.00064	1.68836	3.80237	3.62184	3.26864	3.43435	3.30596	2.98738	4.02759	5.77898	5.77658	2.21072	3.56428	3.24256	170.439	-0.0233418	0.892623	0.957099	77.9296	5.4826	8.37373e-08	5.95753e-07	121.505	3.33675	3.75097e-34	4.42527e-33	102.139	3.92909	9.37781e-33	7.13321e-32	53.8207
ENSMUSG00000000532	Acvr1b	7.96092	7.06606	5.86096	6.60645	7.68208	7.3473	7.33044	7.56057	7.39029	7.57126	7.77579	7.66969	7.68222	7.40478	7.42996	7.55261	7.20388	7.2928	7.32395	6.65485	6.748	6.38265	6.2419	6.68333	6.54086	7.23763	7.70923	7.46245	7.27354	6.59517	6.4887	432.934	0.324245	0.00716533	0.0368495	346.282	0.737841	2.44873e-07	1.62829e-06	404.28	1.78077	6.86482e-26	5.96217e-25	339.718	1.98912	1.42321e-30	1.01172e-29	209.483
ENSMUSG00000000538	Tom1l2	7.68526	7.73084	7.14822	7.6323	7.53395	7.72798	7.71357	7.48976	7.57736	7.83283	8.47319	8.30595	8.32906	8.12434	8.07195	8.06814	8.50091	8.58111	8.34389	8.06279	8.02218	8.19476	6.73191	6.68504	6.70771	7.60721	8.3694	8.08814	8.4753	8.09324	6.70822	674.511	0.364503	0.000847489	0.00614381	682.558	0.0134744	0.924213	0.952649	817.349	0.616888	2.88818e-06	8.55557e-06	497.158	2.66387	1.97298e-72	3.91439e-71	419.363
ENSMUSG00000000544	Gpa33	-2.3342	-2.33796	-2.32378	-2.31955	-2.32608	-2.32885	-2.34483	-2.33619	-2.33955	-2.34007	-2.35744	-2.35749	-2.35294	-2.34857	-2.35425	-2.34165	-2.33517	-2.3515	-2.3437	-2.35311	-2.35191	-2.35518	-2.34821	-2.34909	-2.31841	-2.33311	-2.35596	-2.34816	-2.34346	-2.3534	-2.33857	0	NA	NA	NA	0	NA	NA	NA	0	NA	NA	NA	0.213715	-1.6615	0.683878	NA	0
ENSMUSG00000000552	Zfp385a	6.12588	6.01294	5.27342	5.12489	5.01609	5.8622	5.59131	5.37754	5.3636	5.77465	5.87222	5.71406	5.37418	4.92797	4.94544	4.67919	7.71726	8.11573	7.80316	6.26013	6.56961	6.50632	7.48017	7.48566	7.2233	5.55225	5.65349	4.85087	7.87872	6.44535	7.39638	64.5585	1.21479	1.84894e-05	0.000205129	327.258	-2.79872	8.3705e-37	3.71825e-35	164.711	-0.824363	0.000174027	0.000422717	260.407	-2.01119	1.02326e-23	5.86374e-23	211.999
ENSMUSG00000000555	Itga5	2.53406	1.35314	1.10148	1.22395	1.87208	3.56093	1.9326	1.42807	1.98909	1.26534	1.80122	1.4014	1.67373	0.930134	0.304443	0.611307	0.786546	1.5823	2.18027	2.78519	2.74844	2.54125	4.70643	4.77272	4.73661	1.82607	1.62545	0.615295	1.51637	2.69163	4.73858	2.70912	3.25859	0.0313029	0.115571	4.14286	0.108614	0.911802	0.943668	12.4011	-1.51589	0.0074341	0.0141473	55.8	-4.26465	1.0974e-27	7.14941e-27	1.46637
ENSMUSG00000000560	Gabra2	7.33744	7.1929	7.78642	7.35765	6.71816	7.01727	6.7497	7.15088	6.84593	7.04376	7.14676	7.41055	7.50794	7.82509	8.06066	8.08519	5.14542	5.52146	6.42682	8.73869	8.62322	8.46859	5.11519	5.24538	4.8589	7.12001	7.35508	7.99031	5.6979	8.61017	5.07315	504.417	-0.851973	1.50851e-09	3.38077e-08	194.372	2.33217	5.86142e-10	5.41294e-09	846.099	-1.38443	3.06457e-17	1.8519e-16	218.332	3.76672	7.4768e-52	9.2888e-51	222.25
ENSMUSG00000000561	Wdr77	-0.518565	0.729934	-0.269481	-0.168444	1.31626	0.320329	1.07352	-0.566129	0.881477	1.3332	-0.526344	-0.566266	-0.104253	-0.719941	-0.144461	-0.66241	-0.541689	-0.740912	-0.68057	-0.751534	-0.743631	-0.764255	-0.71719	0.0203383	-0.71693	0.41321	-0.398954	-0.508937	-0.654391	-0.75314	-0.471261	0.847568	0.334043	0.872349	NA	0.47843	1.68029	0.532376	NA	0.691299	2.7212	0.251494	0.328959	1.00188	0.458143	0.81843	0.851399	0.19579
ENSMUSG00000000562	Adora3	-0.216276	1.9021	0.180851	1.47567	0.0930141	1.72146	-0.595651	-0.29211	1.08129	-0.43993	-1.1191	-1.19542	-0.864775	-0.719578	-0.908461	-0.491351	-0.253144	-0.817112	-0.558383	-0.870578	-0.83051	-0.939	7.1065	7.21259	7.11142	0.491041	-1.05977	-0.706463	-0.54288	-0.880029	7.1435	0	NA	NA	NA	0	NA	NA	NA	0	NA	NA	NA	115.881	-10.662	3.77568e-19	1.83745e-18	0
ENSMUSG00000000563	Atp5pb	8.0254	7.61652	7.6088	7.20026	7.63525	7.77724	8.34301	8.49245	8.15813	8.16744	8.16572	8.25481	8.2352	8.40602	8.35656	8.4426	8.43068	8.75315	8.72863	8.69178	8.53549	8.87854	8.12621	8.15484	8.12319	7.90245	8.21858	8.40173	8.63749	8.70194	8.13475	657.489	-0.259916	0.0129241	0.058995	631.206	-0.431106	0.0039375	0.0119945	908.312	-0.415384	0.00394845	0.00786703	588.944	0.427293	0.000195112	0.000411791	473.685
ENSMUSG00000000567	Sox9	4.999	5.79458	5.55545	4.64368	4.78946	5.91512	5.33394	4.22264	5.13791	4.2202	4.00117	3.64923	3.75178	2.59197	2.95109	2.40143	3.28126	3.56609	3.01922	8.48294	8.66597	8.88058	4.35844	4.09173	4.10456	5.0612	3.80073	2.64816	3.28886	8.6765	4.18491	12.798	2.02055	0.00140923	0.00955797	14.0028	0.988887	0.0789147	0.154581	943.715	-6.08928	8.46835e-174	1.10617e-171	25.9768	-0.251774	0.512217	0.576807	4.61808
ENSMUSG00000000568	Hnrnpd	7.01371	7.6491	7.64162	7.1538	6.91034	7.29539	7.07373	6.72059	7.13523	6.74877	7.86173	7.87117	7.98585	8.32741	8.31532	8.41776	8.14199	8.21089	8.81502	8.27522	8.22037	8.03904	8.60876	8.58589	8.79939	7.13423	7.90625	8.35349	8.3893	8.17821	8.66468	620.423	-0.615589	1.22191e-08	2.38023e-07	544.449	-0.54988	0.0172646	0.0435478	667.63	-0.126786	0.371712	0.456957	727.995	-0.706465	2.19323e-08	6.34525e-08	457.246
ENSMUSG00000000579	Dynlt1c	0	0	0	0	0	0	0	0	0	0	0	0	0	0	0	0	0	0	0	0	0	0	0	0	0	NA	NA	NA	NA	NA	NA	NA	NA	NA	NA	NA	NA	NA	NA	NA	NA	NA	NA	NA	NA	NA	NA	NA
ENSMUSG00000000581	C1d	5.65588	5.65739	6.0091	5.44131	5.79578	5.8308	5.40762	5.63954	5.55371	5.35455	6.18517	6.37118	6.25797	6.54532	6.60535	6.61182	6.24259	6.552	6.9242	6.43198	6.56823	6.15439	6.40485	6.46568	6.74349	5.63457	6.27144	6.58749	6.57293	6.38487	6.53801	189.867	-0.440896	0.0054693	0.0295921	162.066	-0.314685	0.18876	0.308849	204.246	0.0820033	0.67592	0.742416	185.903	-0.0608409	0.740819	0.785124	129.938
ENSMUSG00000000594	Gm2a	5.69246	6.61562	5.67271	7.11394	6.34954	6.07638	6.15336	5.95539	5.86259	5.96183	5.84913	5.78266	5.92234	5.64418	5.54245	5.73119	6.90218	6.96615	6.99752	9.13866	9.32085	9.41613	9.48702	9.53141	9.59983	6.14538	5.85138	5.63927	6.95528	9.29188	9.53942	74.9296	0.333624	0.155714	0.360178	138.896	-1.44251	9.82065e-15	1.43298e-13	1166.21	-4.36727	3.88142e-181	5.41674e-179	1185.34	-4.60766	5.5903e-275	2.048e-272	91.3616
ENSMUSG00000000600	Krit1	7.31025	6.92116	6.43714	6.47709	6.7672	6.51701	6.76506	7.38719	7.01116	6.83603	6.26576	6.34126	6.52486	6.35053	6.65302	6.68233	5.83887	6.36244	6.5283	6.63891	6.48635	6.29891	6.29034	6.03909	6.0277	6.84293	6.37729	6.56196	6.2432	6.47472	6.11904	176.408	-0.283883	0.109313	0.284026	130.256	0.266374	0.290353	0.428208	200.49	0.100287	0.605851	0.680213	146.382	0.671618	0.000787486	0.00155455	100.354
ENSMUSG00000000605	Clcn4	8.369	8.18574	8.20213	8.22549	8.4937	8.41947	8.29637	8.66133	8.55701	8.38406	8.54039	8.55981	8.58997	8.61866	8.45212	8.33906	8.74978	8.73783	8.71162	9.06301	9.15059	9.11153	8.03268	8.09299	8.14981	8.37943	8.56339	8.46995	8.73307	9.10838	8.09183	740.795	0.100162	0.372078	0.611551	712.374	-0.073736	0.501644	0.635809	1208.07	-0.49939	5.40164e-06	1.55937e-05	654.306	0.97988	1.14154e-17	5.21541e-17	475.435
ENSMUSG00000000606	Vmn2r88	0	0	0	0	0	0	0	0	0	0	0	0	0	0	0	0	0	0	0	0	0	0	0	0	0	NA	NA	NA	NA	NA	NA	NA	NA	NA	NA	NA	NA	NA	NA	NA	NA	NA	NA	NA	NA	NA	NA	NA
ENSMUSG00000000617	Grm6	0	0	0	0	0	0	0	0	0	0	0	0	0	0	0	0	0	0	0	0	0	0	0	0	0	NA	NA	NA	NA	NA	NA	NA	NA	NA	NA	NA	NA	NA	NA	NA	NA	NA	NA	NA	NA	NA	NA	NA
ENSMUSG00000000627	Sema4f	5.41263	4.76668	4.96679	4.84888	4.91897	5.06858	5.16811	5.44549	5.00899	5.54472	5.45469	5.33918	5.28752	5.22313	5.07126	4.47695	5.26895	5.20567	5.17519	4.19969	4.24234	3.79198	3.58084	4.06505	3.10149	5.11499	5.36046	4.92378	5.2166	4.078	3.58246	81.0559	0.500394	0.0429182	0.146582	77.344	0.369187	0.12092	0.218085	77.0898	2.13396	1.67723e-14	8.89441e-14	61.415	2.9339	2.73029e-16	1.17354e-15	44.0647
ENSMUSG00000000628	Hk2	4.352	3.38276	1.92355	2.08057	4.44875	3.65149	3.86932	3.18047	3.27948	4.14348	1.4384	1.75817	1.28528	2.57802	2.24473	2.15213	1.49562	2.09173	1.18374	4.56971	4.5626	4.9506	8.24641	7.97447	8.1683	3.43119	1.49395	2.32496	1.59036	4.69431	8.12973	4.07825	-1.57526	0.102581	0.272074	1.51062	0.293036	0.860758	0.908797	39.1891	-4.74556	9.12219e-18	5.69805e-17	578.91	-8.86091	2.87227e-76	6.25821e-75	2.32501
ENSMUSG00000000631	Myo18a	10.0124	9.33595	9.19581	8.66764	9.27415	8.56386	10.3007	9.70979	8.97853	9.43261	7.88645	7.72247	7.59918	7.61994	7.5672	7.26573	7.22921	6.89838	6.58904	7.02106	7.05796	6.96968	8.68198	8.79142	9.05963	9.34714	7.73603	7.48429	6.90554	7.01623	8.84434	328.699	0.332284	0.0317114	0.116886	230.629	1.40188	8.27121e-09	6.73842e-08	335.234	1.33262	1.04732e-15	5.87047e-15	690.23	-1.20908	3.56139e-13	1.33769e-12	134.408
ENSMUSG00000000632	Sez6	7.83234	8.13693	7.99706	8.20622	8.04549	8.2041	7.55591	7.24916	7.46184	7.62049	8.99693	8.74997	8.72136	9.44483	9.25753	9.22064	7.60259	7.63791	7.29573	7.86738	7.99357	7.02609	6.05853	6.6565	6.45946	7.83095	8.82275	9.30766	7.51207	7.62901	6.39149	1442.02	-0.634056	3.63664e-08	6.51581e-07	645.376	1.92289	1.61033e-26	4.8794e-25	954.866	1.75494	2.83321e-05	7.57625e-05	687.278	3.73029	7.16079e-74	1.48037e-72	635.141
ENSMUSG00000000673	Haao	-0.859558	-0.963176	-0.53966	-0.409898	-0.610415	-0.695421	-0.3782	-0.920644	-0.989072	-0.997643	-1.28409	-1.31059	-1.18764	-1.12779	-0.675031	-1.02384	-0.889256	-1.16833	-0.340489	-0.640873	-1.17379	-0.702216	2.00129	1.97477	1.84493	-0.736369	-1.26077	-0.942221	-0.799358	-0.83896	1.94033	0.158755	-1.99693	0.624295	NA	0.258767	-2.42309	0.551185	NA	0.347803	-2.08947	0.529723	NA	25.031	-8.45112	6.33061e-12	2.23651e-11	0.277549
ENSMUSG00000000682	Cd52	2.21726	0.295789	0.811325	3.16856	3.71898	1.57257	0.0365811	0.361469	1.01861	0.216842	1.32209	1.2924	1.05885	-0.105872	-0.321459	0.157422	0.399095	-0.217367	0.0796454	0.332297	0.809187	0.628163	7.50244	9.31373	9.26354	1.3418	1.22445	-0.0899693	0.0871243	0.589882	8.69324	1.9182	3.87458	0.0195883	0.0815032	1.7336	3.58964	0.0378285	0.0847563	3.41152	1.4768	0.164499	0.230622	665.902	-8.21099	1.19298e-106	4.60612e-105	0
ENSMUSG00000000686	Abhd15	0.175412	0.0714081	0.525551	0.679544	2.7302	2.55077	1.31506	1.44811	0.0273247	0.0128888	-0.521154	-0.574148	-0.333569	-0.219507	-0.36693	-0.0307745	1.86825	0.284314	0.610734	1.28101	1.1613	1.78906	4.99848	5.01839	5.20897	0.953627	-0.47629	-0.205737	0.9211	1.41045	5.07528	0	NA	NA	NA	1.78707	-4.82275	0.014837	0.0383054	3.3464	-5.35222	0.000404638	0.000935031	57.8944	-9.66055	9.36719e-16	3.91929e-15	1.25624
ENSMUSG00000000690	Hoxb6	-1.18933	-1.23706	-1.05707	-1.00341	-1.08632	-1.12147	-1.32423	0.0395119	-1.25722	-1.26382	-1.36911	-1.37149	-1.35885	-1.351	-1.36091	-1.28382	-0.824015	-1.08339	-0.66889	-1.10748	-1.08957	-1.13622	-1.35026	-1.35201	-1.02869	-1.05004	-1.36648	-1.33191	-0.858767	-1.11109	-1.24366	0	NA	NA	NA	1.12862	-4.24709	0.0468248	NA	0.549696	-2.73374	0.28362	NA	0.213715	-1.6615	0.683878	NA	0.789134
ENSMUSG00000000693	Loxl3	0.917408	2.42973	3.73052	4.6031	3.38363	1.86716	2.3816	2.28393	2.33633	2.30594	0.17784	0.125369	0.36837	0.487428	0.333986	0.68936	0.887441	1.21014	0.628149	4.9372	5.02892	5.17982	4.02529	4.19467	3.87425	2.62393	0.22386	0.503591	0.908577	5.04865	4.03141	0	NA	NA	NA	0.30495	-2.77532	0.493744	NA	73.4119	-9.79965	3.1941e-16	1.84287e-15	24.7601	-8.43626	7.35575e-12	2.58535e-11	0.21289
ENSMUSG00000000701	Tcl1b5	0	0	0	0	0	0	0	0	0	0	0	0	0	0	0	0	0	0	0	0	0	0	0	0	0	NA	NA	NA	NA	NA	NA	NA	NA	NA	NA	NA	NA	NA	NA	NA	NA	NA	NA	NA	NA	NA	NA	NA
ENSMUSG00000000706	Btn1a1	-0.955539	-1.0367	-0.730618	1.2385	-0.780366	-0.840134	-0.618669	-0.998489	-0.470058	-1.08221	-0.758325	-1.26683	-1.22117	-1.1954	-1.22821	-1.11622	0.103373	0.0517953	-1.15999	-0.821614	-0.794517	-0.103322	-1.19308	-1.19864	-1.19286	-0.627429	-1.08211	-1.17994	-0.334942	-0.573151	-1.19486	0.203007	0.719104	0.858727	NA	1.8636	-3.05013	0.10402	0.193317	1.4545	-2.07593	0.246634	0.32364	0.231231	1.08262	0.788716	NA	1.17899
ENSMUSG00000000708	Kat2b	4.66264	4.11896	4.59753	4.54534	5.67634	5.09242	4.6437	5.37426	4.77591	4.65268	2.60594	2.63835	2.38874	3.00807	2.48271	1.98785	5.07766	5.51747	5.62869	5.28641	5.15439	5.50834	5.31875	5.24107	5.19596	4.81398	2.54434	2.49288	5.40794	5.31638	5.25193	4.21847	0.0472307	0.960747	0.985755	47.8289	-4.49572	1.34973e-24	3.60879e-23	58.9433	-4.23407	2.22512e-25	1.89524e-24	46.065	-4.07051	4.02863e-23	2.25286e-22	33.2581
ENSMUSG00000000711	Rab5b	6.04813	5.62919	4.00237	4.90617	4.66937	5.81186	5.89773	5.90779	5.27692	5.56428	5.28193	5.41268	5.55445	5.13323	5.43147	5.37876	5.20241	5.11494	5.00487	6.00043	6.0032	6.1103	5.8377	5.87558	5.45672	5.37138	5.41635	5.31449	5.10741	6.03798	5.72334	81.1924	0.117695	0.614214	0.798418	63.3791	0.61777	0.0225325	0.0547496	139.721	-0.622967	0.00133724	0.00288549	100.636	-0.14543	0.532634	0.596643	41.4591
ENSMUSG00000000724	Cryba1	-1.99631	-2.00748	-1.96533	-1.95277	-1.97218	-1.98041	-1.93947	-2.00222	-2.0122	-2.01375	-1.99911	-2.05697	-1.96355	-2.03901	-2.05552	-2.01843	-1.99918	-2.04771	-2.02453	-1.96407	-2.04891	-2.05569	-2.03792	-2.04054	-2.03782	-1.98421	-2.00655	-2.03765	-2.02381	-2.02289	-2.03876	0.272332	1.00002	0.775569	NA	0.245988	0.727195	0.855217	NA	0.543237	0.769748	0.772045	NA	0.307804	1.35809	0.69874	NA	0
ENSMUSG00000000730	Dnmt3l	-2.33107	-2.33682	-2.31512	-2.30865	-2.31865	-2.32289	-2.34733	-2.33411	-2.33925	-2.34005	-2.3668	-2.36691	-2.35973	-2.35305	-2.36175	-2.29693	-2.33255	-2.35754	-2.3456	-2.36	-2.35815	-2.36316	-2.3525	-2.35384	-2.35244	-2.32939	-2.36448	-2.33724	-2.34523	-2.36044	-2.35293	0.369515	-2.05641	0.547498	NA	0	NA	NA	NA	0	NA	NA	NA	0	NA	NA	NA	0.22897
ENSMUSG00000000731	Aire	-2.33578	-2.33853	-2.32816	-2.32507	-2.32984	-2.33187	-2.34355	-2.33723	-2.33969	-2.34007	-2.35272	-2.35275	-2.32772	-2.34628	-2.35044	-2.34122	-2.33648	-2.34842	-2.34272	-2.3496	-2.34872	-2.35111	-2.34602	-2.34666	-2.34599	-2.33498	-2.3444	-2.34598	-2.34254	-2.34981	-2.34622	0.170828	-0.0958564	0.981258	NA	0.153987	-0.379878	0.925828	NA	0.222919	0.67431	0.868747	NA	0.192188	0.26208	0.948789	NA	0
ENSMUSG00000000732	Icosl	2.69816	1.77483	3.32648	2.6794	3.18514	3.28222	2.79674	3.20243	2.6235	3.10025	0.444066	1.16894	0.670591	1.63008	2.43946	2.26918	1.27147	1.16732	0.97269	5.38163	5.62424	5.73	6.64495	6.9696	6.77675	2.86691	0.761198	2.11291	1.13716	5.57862	6.7971	3.26135	-3.30077	0.0125184	0.0575349	0.387838	-0.14272	0.9667	NA	92.19	-7.74603	3.53586e-19	2.33172e-18	214.041	-9.16441	6.07333e-27	3.86402e-26	1.95905
ENSMUSG00000000738	Spg7	6.1753	6.18764	6.53088	5.0711	6.43588	6.13862	6.0394	6.4863	5.9395	6.3459	5.59178	5.64196	5.52745	5.96399	5.81936	5.51712	6.13172	5.81687	5.91142	5.61021	5.73596	5.79044	5.68218	5.88291	5.78304	6.13505	5.58706	5.76683	5.95334	5.7122	5.78271	97.3097	-0.309092	0.149635	0.3501	90.8032	-0.337706	0.138605	0.243078	111.481	0.0705386	0.72891	0.787875	97.973	0.0332239	0.873503	0.89784	68.8912
ENSMUSG00000000739	Sult5a1	-1.16768	-1.21131	-1.04676	-0.997708	-1.0735	-1.10563	-1.291	-1.19077	-1.22974	-1.23577	-1.32479	-1.19849	-1.31677	-0.500701	-0.573725	-0.24746	-1.1789	-1.31488	-1.27786	-1.31699	-1.07709	-0.958285	-1.30997	-1.31136	-1.30991	-1.15499	-1.28002	-0.440629	-1.25721	-1.11745	-1.31041	3.28537	-4.6558	0.00201844	0.0128692	0.0784542	-0.379878	0.925828	NA	0.634802	-1.71498	0.490066	NA	0.098018	0.26208	0.948789	NA	1.97463
ENSMUSG00000000740	Rpl13	0.37509	1.23478	0.58262	0.703593	0.516657	1.61844	0.977411	0.348443	0.305717	0.812508	1.23401	0.984758	0.901228	2.18266	1.24989	0.76666	0.362021	1.66439	2.46354	1.04961	1.23308	1.21053	1.24707	1.59417	1.07489	0.747525	1.04	1.39974	1.49665	1.16441	1.30538	6.59958	-1.18508	0.144142	0.34191	6.83416	-1.4937	0.102927	0.191769	5.37254	-0.0164567	0.983554	0.987911	5.22282	-0.327736	0.68865	0.738985	6.28198
ENSMUSG00000000743	Chmp1a	4.69568	4.66486	3.87734	3.14837	4.41932	4.86566	4.66824	3.68825	4.43513	4.40324	5.87984	5.75326	5.54687	6.07747	5.95699	5.6344	5.30549	5.44089	5.40704	6.07247	6.14693	6.14016	5.95376	6.07461	6.00525	4.28661	5.72665	5.88962	5.38448	6.11985	6.01121	134.372	-0.255988	0.196299	0.416399	91.2301	0.632596	0.00884437	0.0244676	176.888	-0.261702	0.155659	0.219558	142.266	-0.0547476	0.777864	0.816205	69.8773
ENSMUSG00000000751	Rpa1	6.52896	6.42091	7.09903	7.08602	6.48987	6.22815	6.57052	6.89782	6.52059	6.54614	6.91792	6.66689	6.73123	6.90948	7.03784	7.13492	7.23129	7.22549	7.07289	7.77151	7.7617	7.8778	7.23571	7.08664	7.03562	6.6388	6.77202	7.02742	7.17656	7.80367	7.11932	238.906	-0.359736	0.0203143	0.083873	218.499	-0.39553	0.0260755	0.0618177	436.605	-1.14435	2.37296e-14	1.24624e-13	250.506	-0.165959	0.324882	0.390319	169.956
ENSMUSG00000000753	Serpinf1	5.16415	4.70482	4.33817	3.40047	4.36099	3.83355	4.13846	5.19344	4.91779	4.19102	1.91729	1.66981	2.38739	3.03119	3.02687	2.92023	5.54618	5.77145	5.68178	5.64413	5.6334	5.8193	7.40116	7.42937	7.50656	4.42429	1.9915	2.99277	5.66647	5.69895	7.4457	4.72969	-2.47448	0.0112283	0.0527452	54.4062	-6.4803	1.09397e-23	2.76685e-22	75.6756	-6.42197	1.86901e-24	1.53045e-23	286.523	-8.56976	1.49323e-45	1.57028e-44	39.941
ENSMUSG00000000759	Tubgcp3	6.47993	5.76485	6.1062	4.60986	6.48365	6.12433	6.09334	6.05737	6.09963	6.19454	5.46029	5.44527	5.41067	5.51326	5.28364	5.5409	5.78585	5.59584	5.49829	5.73677	5.58078	5.47437	5.76973	5.6696	5.66204	6.00137	5.43874	5.44593	5.62666	5.59731	5.70046	80.2683	-0.00828542	0.970904	0.98951	74.8899	-0.0949787	0.691066	0.793257	103.095	0.0158881	0.941061	0.957361	91.8564	-0.0620014	0.767594	0.807204	52.3359
ENSMUSG00000000766	Oprm1	4.01518	2.80344	1.87715	4.27139	4.3685	4.37166	2.98299	4.29445	3.88645	4.23758	3.2909	3.31944	3.31012	1.5972	2.14052	1.38367	3.29822	3.64742	3.55349	4.03761	3.58395	2.80069	2.28091	2.2389	2.98003	3.71088	3.30682	1.70713	3.49971	3.47408	2.49995	11.2676	3.00073	0.000127234	0.00116236	19.5927	-0.20323	0.635497	0.750186	28.5535	-0.176872	0.698206	0.761645	15.3896	1.60915	0.00329391	0.00598475	7.85481
ENSMUSG00000000776	Polr3d	2.84342	3.66784	4.42214	3.13938	3.24045	3.60996	3.53802	2.7512	3.85611	2.81095	4.20773	4.21328	4.36552	4.3261	4.21214	4.07388	4.99295	4.6785	4.48663	4.62095	4.32	4.49753	3.95866	4.16593	4.04316	3.38795	4.26218	4.20404	4.71936	4.47949	4.05592	41.7189	0.0432296	0.88688	0.954466	47.1353	-0.50086	0.100893	0.188755	57.1163	-0.0872614	0.747759	0.804224	39.8589	0.60532	0.0520237	0.0775116	32.0751
ENSMUSG00000000782	Tcf7	-0.595323	-0.662675	-0.408681	-0.332972	-0.449962	-0.499558	-0.329559	-0.630963	0.112928	0.529888	-0.586395	-0.612752	-0.110218	-0.733415	-0.750577	-0.705878	-0.61265	-0.240582	-0.714835	0.0239748	0.489983	0.172696	-0.732154	-0.73517	-0.152724	-0.326688	-0.436455	-0.729957	-0.522689	0.228885	-0.540016	0.700887	2.35045	0.311731	NA	0.937367	0.521109	0.800427	NA	4.24049	-2.0611	0.0502831	0.0807696	1.21763	0.806922	0.672732	0.724173	0.21289
ENSMUSG00000000787	Ddx3x	8.34254	8.38904	8.87318	8.2898	8.21276	8.06278	8.85873	8.9751	8.73858	8.48686	8.91019	8.80054	9.03514	9.06507	8.96148	9.04916	8.87713	8.49906	8.58018	8.24763	8.16428	8.56303	9.53882	9.52034	9.47886	8.52294	8.91529	9.02524	8.65212	8.32498	9.51268	1071.85	-0.159887	0.12865	0.316709	780.057	0.515865	0.0024098	0.0077708	978.796	1.04807	2.94275e-10	1.1917e-09	1370.58	-0.481447	3.52268e-05	7.97197e-05	574.433
ENSMUSG00000000791	Il12rb1	-1.02483	-1.07402	-0.888514	-0.833219	-0.918664	-0.954887	-0.357941	-0.0412122	-1.0948	-0.712791	-1.18776	-1.05442	-1.17782	-1.17017	-1.17982	-1.12221	-1.03749	-1.17549	-0.787185	-0.608411	-0.925968	-1.18114	-0.868432	-0.882876	-1.16938	-0.790088	-1.14	-1.1574	-1.00005	-0.905172	-0.973564	0.0868986	-0.0958564	0.981258	NA	0.337221	-1.45237	0.684779	NA	0.8784	-2.23682	0.325829	0.409809	0.516178	-1.58844	0.552402	NA	0.179654
ENSMUSG00000000792	Slc5a5	2.20845	3.52665	1.52194	2.91055	3.14961	2.75662	2.88153	2.38717	2.74656	1.95692	2.82495	3.2299	2.82185	2.58686	2.51197	3.06562	2.6543	1.88049	2.04043	2.57329	2.41123	1.97023	2.51291	2.12655	2.02289	2.6046	2.9589	2.72148	2.19174	2.31825	2.22078	17.5039	0.441064	0.366465	0.607166	12.0912	1.66564	0.0128658	0.0338576	17.8237	1.37936	0.00692218	0.0132271	14.6919	1.64502	0.00366861	0.00662141	7.00358
ENSMUSG00000000794	Kcnn3	4.1472	5.38302	5.43507	4.99377	3.92003	5.51223	5.06965	5.48258	5.21289	5.14679	3.76476	3.82117	3.95142	3.52116	3.672	3.04572	2.93015	3.02712	2.75613	6.1176	6.36991	6.42504	2.98962	3.8516	3.10586	5.03032	3.84578	3.41296	2.90447	6.30418	3.31569	19.5979	0.580046	0.198415	0.41942	13.7595	1.83432	0.00204313	0.00672122	153.952	-3.16102	4.11256e-43	6.41968e-42	19.998	1.06147	0.0285201	0.0446243	6.7168
ENSMUSG00000000804	Usp32	8.16505	7.91313	7.39908	7.91377	7.98203	7.85651	8.09251	8.48882	8.12551	8.08798	7.61945	7.65236	7.66044	7.66726	7.67849	7.7531	7.79776	7.66454	7.61974	7.75891	7.66848	7.73128	7.00796	7.12678	7.22706	8.00244	7.64409	7.69962	7.69401	7.71956	7.1206	402.58	-0.0873522	0.460569	0.689904	342.092	0.0966124	0.489954	0.62534	484.122	0.141868	0.269729	0.349507	326.771	1.04932	2.08705e-13	7.92417e-13	244.26
ENSMUSG00000000805	Car4	5.22676	4.52146	5.44784	5.11504	5.12652	5.31426	6.12778	5.8313	5.89226	6.10637	5.17134	5.18808	5.30736	5.45689	5.0964	5.56238	6.56855	6.23964	6.5623	3.9862	3.8694	3.19746	4.13539	4.22486	4.18722	5.47096	5.22226	5.37189	6.45683	3.68435	4.18249	82.8892	-0.221098	0.345423	0.587828	133.119	-1.51797	1.17095e-12	1.41817e-11	57.6634	2.60304	5.94088e-14	3.06002e-13	54.3996	1.88364	2.94567e-10	9.51469e-10	96.9081
ENSMUSG00000000811	Txnrd3	3.84765	2.9418	2.0866	4.54075	4.36779	3.80024	3.53106	4.07379	3.41575	3.38513	2.69229	2.91932	2.98985	2.56151	2.84819	2.75137	4.06177	3.79439	3.85077	4.11868	4.31164	4.21251	3.9319	3.51489	3.97209	3.59906	2.86715	2.72036	3.90231	4.21428	3.80629	9.76542	0.270891	0.660792	0.82864	18.881	-1.50917	0.000927678	0.00330956	32.8716	-1.89705	2.64964e-07	8.61132e-07	20.4764	-1.25283	0.00454681	0.00810064	12.513
ENSMUSG00000000817	Fasl	0	0	0	0	0	0	0	0	0	0	0	0	0	0	0	0	0	0	0	0	0	0	0	0	0	NA	NA	NA	NA	NA	NA	NA	NA	NA	NA	NA	NA	NA	NA	NA	NA	NA	NA	NA	NA	NA	NA	NA
ENSMUSG00000000823	Zfp512b	5.01839	4.94855	5.28641	2.86109	4.52694	5.21617	4.86513	3.29101	4.61259	4.35477	5.46191	5.2085	5.10059	5.33343	5.37391	5.10999	4.60253	4.11213	4.60808	4.70594	4.45342	4.65946	4.24038	4.33449	4.46084	4.49811	5.257	5.27244	4.44091	4.60627	4.34524	92.763	-0.0427793	0.848	0.934035	58.1587	1.37684	3.11984e-05	0.000150907	86.1442	1.18568	2.44515e-06	7.28547e-06	68.5248	1.64927	4.71789e-09	1.42023e-08	40.6001
ENSMUSG00000000826	Dnajc5	7.2391	7.81492	8.03764	7.03507	7.47021	7.51877	7.79419	7.29324	7.78255	7.7833	8.2996	8.17737	8.23871	8.39891	8.19903	8.23066	8.87603	8.76434	8.99454	7.74528	7.79186	7.63578	8.11347	8.10431	8.37267	7.5769	8.23856	8.2762	8.87831	7.72431	8.19682	659.784	-0.0686326	0.540984	0.749502	762.301	-0.69295	2.20638e-07	1.47974e-06	636.761	0.954095	8.24704e-13	3.96169e-12	647.89	0.360917	0.00904252	0.0154263	537.709
ENSMUSG00000000827	Tpd52l2	4.85875	5.44774	6.06626	6.41275	4.91276	5.41665	5.24133	4.96339	5.18436	4.85568	6.09626	6.06849	6.11426	6.20415	6.05334	6.22732	6.8031	6.8427	6.90636	6.80753	6.89128	6.89828	7.26887	7.42799	7.45768	5.33597	6.093	6.1616	6.85072	6.8657	7.38484	140.522	-0.102361	0.562235	0.764353	172.989	-0.881713	1.22016e-07	8.49148e-07	241.645	-0.80651	1.62949e-07	5.39902e-07	281.07	-1.4256	3.45818e-22	1.87721e-21	123.341
ENSMUSG00000000838	Fmr1	6.84515	6.94589	6.2025	6.83899	6.39941	6.9946	6.73644	6.14482	6.46408	6.25403	7.38457	7.35187	7.54837	7.23396	7.2471	7.47128	6.38742	6.71025	6.79643	7.3563	7.25101	7.15971	7.25548	7.13233	7.24882	6.58259	7.42827	7.31745	6.63136	7.25567	7.21221	374.179	0.139392	0.30144	0.542559	251.471	1.2092	1.03265e-10	1.03835e-09	437.817	0.476609	0.00153226	0.00327042	366.526	0.600382	2.39609e-05	5.51192e-05	162.435
ENSMUSG00000000861	Bcl11a	6.14142	6.97904	7.22447	6.62465	6.4317	6.38248	6.38444	5.88962	6.3877	6.234	7.58963	7.59252	7.53442	7.96271	7.91212	7.91737	6.35145	6.56751	6.62177	6.02182	6.12978	5.38887	4.59898	4.96553	5.04947	6.46795	7.57219	7.93074	6.51358	5.84682	4.87133	584.042	-0.474984	6.69075e-06	8.20397e-05	295.082	1.54518	6.16528e-22	1.41409e-20	372.686	2.55841	2.86878e-29	2.84924e-28	291.007	4.21017	3.49872e-81	8.36349e-80	261.657
ENSMUSG00000000869	Il4	0	0	0	0	0	0	0	0	0	0	0	0	0	0	0	0	0	0	0	0	0	0	0	0	0	NA	NA	NA	NA	NA	NA	NA	NA	NA	NA	NA	NA	NA	NA	NA	NA	NA	NA	NA	NA	NA	NA	NA
ENSMUSG00000000876	Pxmp4	2.84894	1.54881	1.96041	3.93605	4.07176	3.13871	3.23627	2.96198	2.77942	3.07433	3.48153	3.608	3.16753	2.8301	2.77175	2.83784	2.52279	3.19629	2.99545	4.69106	4.74841	5.5012	4.30799	4.07301	4.33713	2.95567	3.41902	2.81323	2.90484	4.98022	4.23938	16.4694	1.04214	0.0383586	0.133806	14.9767	0.897224	0.0999134	0.187148	73.172	-2.01356	4.2026e-09	1.57385e-08	35.4807	-0.853691	0.0118147	0.0197451	6.86127
ENSMUSG00000000881	Dlg3	7.32332	7.16953	7.80101	7.17	7.57177	7.06581	7.21005	7.26172	7.01735	7.13077	8.19633	8.18522	8.09583	8.546	8.28089	8.40876	6.95128	6.85019	6.79565	6.5944	6.56152	6.54159	6.36392	6.23017	6.16663	7.27213	8.15913	8.41188	6.86571	6.56583	6.25358	803.509	-0.34262	0.00209893	0.0132876	404.392	1.92729	4.30623e-38	1.99494e-36	545.992	2.43957	2.12134e-68	6.49854e-67	451.064	2.96805	9.23413e-82	2.22765e-80	336.857
ENSMUSG00000000884	Gnb1l	2.52869	1.20664	0.907788	4.56483	0.856233	1.56291	1.9381	1.98261	1.52991	2.01036	1.17784	1.28528	1.66127	1.14896	1.31862	1.43732	0.654526	1.59862	1.34895	1.3697	2.20653	2.09507	2.14261	1.85869	2.14452	1.90881	1.3748	1.30163	1.2007	1.89043	2.04861	3.97815	0.202236	0.833227	0.92633	3.21302	0.346321	0.751349	0.834786	7.68252	-0.861026	0.234964	0.310611	7.06846	-0.994131	0.162792	0.213812	2.02569
ENSMUSG00000000889	Dbh	-0.105071	-0.14777	0.160471	0.270929	1.34145	0.748148	1.30983	-0.127996	0.768248	-0.170445	0.249751	-0.341838	0.500669	-0.250529	0.0293173	-0.186716	-0.116303	0.0889147	0.61177	1.56493	1.94339	0.928753	-0.247501	0.970485	1.01213	0.404779	0.136194	-0.135976	0.194794	1.47902	0.578373	0.97575	1.63145	0.441818	NA	1.40797	-0.0110311	0.995162	0.997649	8.85354	-3.04415	0.000719287	0.00161415	3.00166	-1.2728	0.350842	0.417527	0.563648
ENSMUSG00000000901	Mmp11	0.0115078	0.562033	0.26776	0.382561	1.45723	1.33132	-0.110444	-0.0132602	-0.0532329	-0.0591922	0.00818736	0.514904	0.160544	-0.146205	0.131918	-0.0768279	0.65084	0.192986	0.720642	1.84102	1.61182	1.8644	1.25277	1.43099	0.967108	0.377628	0.227879	-0.0303717	0.52149	1.77241	1.21695	0.86558	1.50362	0.469103	NA	1.76688	-0.679995	0.637081	0.751465	9.73557	-3.17199	4.91965e-05	0.000127911	4.56558	-2.16923	0.0257264	0.0405796	0.887029
ENSMUSG00000000902	Smarcb1	6.24022	6.90532	6.33688	6.14899	6.08145	6.39522	6.50742	6.2462	6.57898	6.38449	7.49557	7.4869	7.40547	7.48808	7.60985	7.34763	7.4741	7.15132	7.06997	7.66354	7.70429	7.73615	7.32759	7.19363	7.16293	6.38252	7.46265	7.48185	7.2318	7.70133	7.22805	402.528	-0.0572874	0.653216	0.82346	309.864	0.476686	0.00646642	0.0185546	529.006	-0.067329	0.593762	0.66954	369.098	0.628603	5.48735e-06	1.33275e-05	217.752
ENSMUSG00000000903	Vpreb3	-1.90478	-1.91796	-1.86827	-1.85346	-1.87635	-1.88605	-1.94202	-1.91175	-1.92352	-1.92534	-1.97142	-1.97161	-1.9704	-1.95511	-1.97075	-1.93086	-1.90817	-1.96538	-1.93805	-1.97059	-1.60835	-1.88255	-1.95384	-1.95692	-1.95372	-1.90095	-1.97115	-1.95224	-1.9372	-1.8205	-1.95483	0	NA	NA	NA	0	NA	NA	NA	0.967532	-3.53671	0.135934	0.194952	0	NA	NA	NA	0
ENSMUSG00000000915	Hip1r	6.52628	6.36584	6.58562	6.08997	6.55488	6.41965	5.8421	6.11697	5.88763	6.23461	6.56123	6.25559	6.46417	5.93968	5.55891	4.96109	6.4941	6.17322	6.14655	6.6181	6.73852	6.85382	5.13228	5.15085	4.94075	6.26235	6.427	5.48656	6.27129	6.73681	5.07462	134.595	1.18847	5.49805e-07	8.2792e-06	151.585	0.390992	0.0722538	0.144477	261.145	-0.170646	0.329744	0.413935	128.622	2.28505	2.28007e-22	1.24542e-21	71.1601
ENSMUSG00000000916	Nsun5	2.79464	2.20859	1.40161	1.49375	2.48653	3.09429	2.08381	2.29284	2.65432	2.48046	2.09608	2.23273	2.3502	2.49717	1.53538	1.79957	3.35487	2.04884	1.94879	2.34116	2.23408	2.37485	2.82397	3.05933	2.75716	2.29909	2.22634	1.94404	2.45083	2.31669	2.88016	7.70383	0.418528	0.567447	0.76864	10.2549	-0.500964	0.505301	0.638943	11.1527	0.0651796	0.907288	0.932649	13.9859	-0.875551	0.0832622	0.11871	6.44395
ENSMUSG00000000934	Top1mt	2.92696	4.3253	4.10657	2.21642	3.79416	4.06439	3.87785	4.13825	3.29747	4.37706	3.05327	3.08856	2.76537	2.804	3.20425	2.91419	3.41893	3.78803	3.52272	3.6155	3.69048	3.48871	3.92476	3.90588	3.88781	3.71244	2.96907	2.97415	3.57656	3.59823	3.90615	12.2848	-0.0254288	0.963227	0.986562	15.5019	-0.869403	0.0784995	0.153939	21.7137	-0.751292	0.0721664	0.111229	22.7048	-1.15803	0.00420077	0.007519	10.7755
ENSMUSG00000000938	Hoxa10	0	0	0	0	0	0	0	0	0	0	0	0	0	0	0	0	0	0	0	0	0	0	0	0	0	NA	NA	NA	NA	NA	NA	NA	NA	NA	NA	NA	NA	NA	NA	NA	NA	NA	NA	NA	NA	NA	NA	NA
ENSMUSG00000000942	Hoxa4	-1.10683	-1.16546	-0.944361	-0.878456	0.411195	-1.02347	-1.27254	-1.13786	-0.726394	-1.19834	-1.32804	-1.33195	-1.31141	-1.29897	-1.3147	-1.2229	-1.12192	-0.741056	-0.27594	-0.783302	-0.751816	-1.31688	-1.29783	-0.934272	-1.29772	-0.904252	-1.3238	-1.27886	-0.712971	-0.950667	-1.17661	0	NA	NA	NA	1.08125	-4.30092	0.0675209	NA	0.779467	-3.22302	0.195781	0.266815	0.201935	-1.6615	0.683878	NA	0.751852
ENSMUSG00000000948	Gm38393	2.477	4.11289	3.88879	4.75938	3.72863	4.57536	3.86174	2.56929	4.24737	3.58014	0.328479	0.248959	0.122631	0.237816	0.885996	0.432028	0.620907	0.159713	0.373321	0.118166	0.649419	0.0663329	1.84889	1.39629	2.00972	3.78006	0.233356	0.518613	0.384647	0.277973	1.75163	0.505912	-0.898085	0.733627	NA	0.170455	0.362401	0.928596	NA	0.447354	0.471599	0.865677	NA	3.18285	-3.59611	0.00861981	0.0147628	0.19579
ENSMUSG00000000957	Mmp14	4.51486	3.68685	4.0646	5.69542	5.1523	4.88051	4.18092	4.71089	4.86004	4.55255	2.42878	2.11719	2.44905	2.27488	1.50372	2.28377	2.90863	3.79663	4.25615	7.21944	7.13167	7.14673	6.06895	6.13909	6.51751	4.62989	2.33167	2.02079	3.6538	7.16595	6.24185	2.66116	1.28606	0.319253	0.5615	10.5355	-2.50765	0.00049615	0.00187924	283.448	-6.93014	2.81037e-70	8.94497e-69	108.484	-5.72889	1.49681e-41	1.42472e-40	6.7027
ENSMUSG00000000958	Slc7a7	0.366875	1.91498	3.14498	0.906446	2.66703	3.05251	-0.00139325	1.65277	0.182805	0.164715	-0.0299395	-0.132943	-0.281735	-0.131591	-0.326434	1.34074	0.333914	-0.23272	0.0381621	1.76601	1.32217	1.4865	7.14595	7.27621	7.15105	1.40517	-0.148206	0.294238	0.0464519	1.52489	7.19107	0.927432	-1.56988	0.477985	NA	0.170455	0.362401	0.928596	NA	3.32769	-3.44875	0.0103951	0.019209	180.845	-9.49818	8.4905e-21	4.4186e-20	0.457939
ENSMUSG00000000959	Oxa1l	5.73963	5.80069	5.3694	6.32584	5.93431	5.23518	6.20149	6.32822	6.07529	6.23079	5.78334	5.76029	5.65968	5.63539	5.74722	5.55594	6.45629	6.22294	6.18032	6.40959	6.43648	6.6116	6.40086	6.31441	6.45793	5.92408	5.73444	5.64618	6.28651	6.48589	6.39106	94.0244	0.101978	0.628966	0.808639	112.385	-0.599411	0.0041126	0.0124657	174.871	-0.799986	7.84042e-06	2.22138e-05	139.551	-0.601889	0.000896049	0.001755	75.604
ENSMUSG00000000976	Heatr6	4.08758	5.28683	4.58076	5.12481	4.91586	5.376	4.61992	4.65113	4.96806	4.57538	4.22772	4.09846	4.00413	4.79444	4.12943	4.30672	5.04831	4.96838	4.89752	4.67393	4.88811	5.17526	5.73082	5.52872	5.75499	4.81863	4.1101	4.4102	4.9714	4.91243	5.67151	32.849	-0.515924	0.153342	0.356167	38.8978	-1.11852	0.000427484	0.00163951	52.1902	-0.979992	0.00123233	0.00267359	74.4961	-1.94867	1.55234e-14	6.19406e-14	30.68
ENSMUSG00000000982	Ccl3	-0.479117	-0.570609	-0.123288	2.41806	-0.20199	1.90555	-0.714514	-0.531162	0.709205	-0.615712	-1.02441	-1.06543	-0.879276	-0.791569	-0.905035	-0.648375	0.921737	-0.850825	-0.691004	-0.882715	-0.250457	-0.366299	2.81573	2.93852	2.95525	0.179642	-0.989706	-0.78166	-0.206697	-0.499824	2.90316	0	NA	NA	NA	0.917219	-3.86752	0.21193	NA	0.361855	-2.1337	0.515523	NA	32.7785	-8.84053	4.10076e-13	1.53771e-12	0.646762
ENSMUSG00000000983	Wfdc18	-0.339996	-0.867581	-0.64431	-0.577759	-0.680598	-0.724195	-0.945614	-0.839706	-0.892585	-0.148103	-0.0437158	0.216838	0.111063	-0.956797	-0.384663	-0.925581	-0.823608	-0.964333	-0.941864	-0.96804	-0.485098	-0.741013	-0.955787	-0.958202	-0.955692	-0.666045	0.0947282	-0.75568	-0.909935	-0.731383	-0.95656	3.97597	2.50434	0.0382542	0.133581	3.16119	4.44855	0.00316351	0.00989664	5.12423	3.05554	0.00569737	0.0110562	3.95414	5.09038	0.000411271	0.00083694	0.293685
ENSMUSG00000001014	Icam4	-1.43591	-1.46352	-1.35939	-1.32835	-1.37631	-1.39665	-1.2955	-1.45052	-1.47518	-1.479	-1.44458	-1.12771	-1.54361	-1.33587	-1.26959	-1.27212	-1.44301	-1.54284	-1.50564	-1.5437	-1.54306	-1.54468	-1.33155	-1.54141	-1.53847	-1.40603	-1.37197	-1.29253	-1.49716	-1.54381	-1.47048	1.54158	-0.432474	0.78276	0.898933	0.562726	1.99306	0.50412	NA	0.810385	3.06304	0.216388	0.289818	0.919949	1.70384	0.446855	0.513276	0.567079
ENSMUSG00000001016	Ilf2	6.71701	6.92819	6.88965	6.4919	6.94461	7.12193	6.99323	7.07554	7.04497	6.91335	7.62628	7.68494	7.63445	7.42842	7.50939	7.69461	7.99251	7.4635	7.45848	7.13087	6.95329	7.0314	6.93241	6.7803	6.86971	6.91204	7.64856	7.54414	7.63817	7.03852	6.86081	434.42	0.131373	0.29128	0.531627	390.703	0.154154	0.4508	0.590397	434.395	1.07777	1.70211e-14	9.01751e-14	353.06	1.39434	2.38658e-23	1.34752e-22	259.055
ENSMUSG00000001017	Chtop	6.44304	6.27967	6.47632	6.16829	6.27759	6.53912	6.46565	5.59494	6.2546	6.03256	7.25295	7.21692	7.21514	7.1364	7.00513	7.06683	7.32308	7.37127	7.29025	7.31423	7.4785	7.26356	7.14788	7.06541	7.06414	6.25318	7.22834	7.06945	7.3282	7.3521	7.09248	310.676	0.203082	0.120277	0.303026	297.791	0.0193902	0.889709	0.928608	421.7	0.0787498	0.581534	0.658754	321.059	0.495267	0.000252151	0.000525207	192.534
ENSMUSG00000001018	Snapin	3.8874	4.88753	4.49672	5.61822	5.17304	4.98868	3.66146	3.91753	4.14473	4.92723	4.41741	4.23274	4.62645	4.58624	4.58562	3.93277	5.52367	5.07528	4.83818	6.41074	6.40652	6.51041	6.26772	6.5747	6.61604	4.57025	4.42553	4.36821	5.14571	6.44256	6.48615	35.0005	-0.0316132	0.928296	0.973146	46.6374	-0.90672	0.00835346	0.02327	157.518	-2.57349	4.46673e-34	5.25452e-33	137.025	-2.57413	2.85184e-29	1.96093e-28	32.0795
ENSMUSG00000001020	S100a4	-2.33548	-2.33842	-2.32732	-2.32401	-2.32912	-2.33129	-2.3438	-2.33703	-2.33966	-2.34007	-2.35363	-2.35365	-2.35014	-2.34672	-2.35117	-2.3413	-2.33623	-2.34901	-2.34291	-2.35027	-2.32604	-2.35189	-2.34644	-2.34713	-2.34641	-2.33462	-2.35247	-2.3464	-2.34272	-2.34274	-2.34666	0	NA	NA	NA	0	NA	NA	NA	0.201892	-1.24927	0.759488	NA	0	NA	NA	NA	0
ENSMUSG00000001021	S100a3	-1.5796	-1.12871	-1.4953	-1.46111	-1.51395	-1.53635	-1.66558	-1.5957	-1.62287	-1.14577	-1.59033	-1.60813	-1.71256	-1.69581	-1.71346	-1.63982	-1.58743	-1.71149	-1.65642	-1.71268	-1.71181	-1.54014	-1.45548	-1.69999	-1.69259	-1.47449	-1.63701	-1.68303	-1.65178	-1.65487	-1.61602	0.188402	0.646029	0.872723	NA	0.170455	0.362401	0.928596	NA	0.405424	0.469683	0.870032	NA	0.429859	0.0600293	0.982932	NA	0
ENSMUSG00000001023	S100a5	-2.37506	-2.37646	-2.37118	-2.3696	-2.37204	-2.37307	-2.37902	-2.3758	-2.37705	-2.37724	-2.38366	-2.37617	-2.38203	-2.38041	-2.38252	-2.37783	-2.37542	-2.3815	-2.37859	-2.3821	-2.38165	-2.38287	-2.38027	-2.3806	-2.38026	-2.37465	-2.38062	-2.38025	-2.3785	-2.3822	-2.38038	0.0868986	-0.0958564	0.981258	NA	0.0784542	-0.379878	0.925828	NA	0.112985	0.67431	0.868747	NA	0.098018	0.26208	0.948789	NA	0
ENSMUSG00000001025	S100a6	2.6308	3.8547	3.78966	5.55567	1.95198	4.00749	3.99492	2.81026	3.55536	3.95543	4.06558	4.3763	4.48647	1.92279	1.88296	2.51316	2.19917	1.79127	3.18506	6.65031	6.82479	6.51188	2.9119	2.85962	3.01635	3.61063	4.30945	2.1063	2.39183	6.66233	2.92929	26.253	3.71546	1.02361e-09	2.32122e-08	24.6956	2.98669	1.07484e-06	6.49205e-06	246.41	-2.78179	2.00892e-42	3.05132e-41	32.613	2.36954	1.48608e-08	4.34084e-08	3.23874
ENSMUSG00000001027	Scn4a	-1.38196	-1.76569	-1.6033	-1.55489	-1.62969	-0.639399	-1.84433	-1.74541	-1.78387	-1.78983	-1.94477	-1.94733	-1.93386	-1.88713	-1.93602	-1.80787	-1.73371	-1.92068	-1.4907	-1.93415	-1.92529	-1.66089	-1.88296	-1.89305	-1.88257	-1.57384	-1.94199	-1.87701	-1.71503	-1.84011	-1.88619	0	NA	NA	NA	0.258767	-2.42309	0.551185	NA	0.159962	-1.24927	0.759488	NA	0	NA	NA	NA	0.179654
ENSMUSG00000001029	Icam2	0.735724	0.60681	1.11916	0.418671	1.90699	2.02505	0.986504	1.38905	-0.0563695	1.42631	-0.00809541	-0.302841	-0.218487	-0.1717	-0.231356	-0.0851691	0.00687663	0.486968	0.422996	-0.220228	0.69122	0.111634	1.45985	1.87244	2.35313	1.05579	-0.176474	-0.162741	0.305613	0.194208	1.89514	0.101503	-0.0958564	0.981258	NA	0.655718	-2.49218	0.318782	NA	0.898116	-2.23467	0.323472	0.40719	8.11299	-5.84306	1.3889e-05	3.26071e-05	0.392544
ENSMUSG00000001034	Mapk7	1.19959	2.68944	2.70439	1.57346	2.13167	3.79196	3.06109	2.0976	3.0089	2.97787	2.16164	2.5924	1.9166	2.12802	2.80921	1.51709	1.17605	1.98468	0.982166	3.02523	3.23105	2.75463	3.79637	3.98963	3.88973	2.5236	2.22355	2.15144	1.38097	3.00364	3.89191	8.38439	-0.111697	0.876119	0.950164	4.51923	1.92453	0.0982691	0.184585	16.5357	-0.977763	0.0563659	0.0896234	27.3793	-2.20438	1.60613e-07	4.38424e-07	3.13701
ENSMUSG00000001036	Epn2	5.87833	6.42132	6.99417	5.68004	6.01809	6.43637	6.38597	5.60089	6.24214	5.8744	7.06709	7.09832	6.90011	7.1556	7.28714	7.25051	6.63291	6.08452	6.22789	6.77513	6.81927	7.00478	6.01588	5.90704	6.24186	6.15317	7.02184	7.23108	6.31511	6.8664	6.05493	332.759	-0.286021	0.0323767	0.1182	198.389	1.14889	2.37773e-07	1.58632e-06	337.109	0.45925	0.00365577	0.00732769	223.234	1.65324	2.70518e-19	1.3255e-18	157.213
ENSMUSG00000001039	B9d1	3.56699	4.36084	3.58278	2.3437	3.69229	3.72367	3.9148	3.80857	4.07804	4.27516	3.9109	3.64393	3.78455	4.16616	3.51563	3.8791	4.36388	3.22094	2.89582	4.62289	4.87125	4.94345	2.90907	2.62635	3.47911	3.73468	3.77979	3.85363	3.49355	4.81253	3.00484	29.5035	-0.14822	0.693678	0.850188	22.7058	0.445373	0.428532	0.569739	61.2649	-1.25884	5.50991e-06	1.58838e-05	21.2252	1.51481	0.00167467	0.00317042	16.7616
ENSMUSG00000001052	Sec24b	7.0453	6.96393	6.29514	4.69482	6.44076	6.82204	6.88654	6.43502	6.8926	6.57747	7.06053	6.92344	6.55774	6.73755	6.76895	6.8602	6.48598	6.39002	6.35252	5.71469	5.82811	6.02859	7.07286	6.92262	6.87063	6.50536	6.84724	6.7889	6.4095	5.85713	6.95537	246.231	0.104805	0.542494	0.750687	181.184	0.802139	0.000428769	0.00164399	217.523	1.66964	3.17188e-14	1.65812e-13	269.827	0.194523	0.325801	0.391244	120.095
ENSMUSG00000001053	N4bp3	2.56456	3.0459	3.36788	2.51163	1.55269	1.48531	3.19222	2.6803	3.44046	2.27914	2.72656	2.98694	2.51225	2.97126	2.97118	2.71088	3.20871	3.13436	2.46221	3.35845	3.01135	3.52595	2.23973	1.88145	1.70971	2.61201	2.74192	2.88444	2.93509	3.29858	1.94363	15.2278	-0.238589	0.63126	0.810203	13.7109	-0.18924	0.736194	0.824242	23.5206	-0.641081	0.131233	0.189024	10.0104	1.92542	0.00559142	0.00985473	10.2684
ENSMUSG00000001054	Rmnd5b	5.36904	5.70842	4.33458	5.50757	5.70161	5.98534	5.36892	5.28353	5.6521	5.66613	5.97729	6.07583	6.04734	6.05293	6.1229	6.15828	5.30543	5.05907	4.84562	5.93589	5.87551	6.20893	5.57008	5.56969	5.52551	5.45772	6.03348	6.11137	5.07004	6.00678	5.5551	152.664	-0.118723	0.484518	0.708667	89.0992	1.56046	6.63583e-10	6.10001e-09	174.093	0.268802	0.152835	0.216134	124.509	0.98118	3.50295e-07	9.33231e-07	65.2264
ENSMUSG00000001056	Nhp2	3.62328	4.75688	4.41031	3.30424	3.00408	2.34518	3.17724	2.5722	3.16231	3.95271	5.02653	5.04717	4.80811	5.22265	4.84015	5.09387	5.12135	5.00144	4.37475	4.74624	4.66332	4.81901	5.13713	5.09175	5.07067	3.43084	4.9606	5.05222	4.83252	4.74286	5.09985	79.601	-0.125268	0.596511	0.786004	62.2081	0.301483	0.332227	0.473496	82.5411	0.564962	0.016224	0.0289167	81.7975	0.135145	0.553359	0.615004	45.5478
ENSMUSG00000001062	Vps9d1	4.46585	5.15853	5.31007	3.81778	4.99624	4.89202	4.31781	3.86329	4.39711	4.62496	4.75865	4.55635	4.54709	4.31717	4.22752	4.52219	4.68041	4.87314	4.70308	3.85115	3.96259	4.06085	4.40843	4.78074	4.77311	4.58437	4.6207	4.35562	4.75221	3.95819	4.65409	45.3269	0.410837	0.17148	0.382328	46.8188	-0.0514185	0.862682	0.910007	47.2615	1.26398	3.60841e-05	9.53677e-05	53.291	0.253582	0.373077	0.439699	28.7331
ENSMUSG00000001065	Zfp276	2.99962	4.15338	3.97913	1.99961	3.66194	4.25921	3.16496	3.69055	3.38583	3.95684	2.99646	2.78585	3.04301	2.76705	2.14769	2.6055	1.56674	2.70149	2.80386	2.9113	2.91268	3.20607	4.24905	3.89296	3.98681	3.52511	2.94177	2.50675	2.35736	3.01002	4.04294	11.0354	0.785411	0.19641	0.416563	9.1687	0.904317	0.197323	0.319546	17.2327	0.108361	0.814777	0.858745	28.5143	-1.42154	0.000168356	0.000357718	4.57984
ENSMUSG00000001076	C1ql4	-1.74045	-1.77545	-1.64348	-1.60415	-1.11128	-1.6907	-1.83935	-1.75897	-1.79022	-1.79506	-1.91606	-1.91759	-1.65958	-1.87413	-1.91077	-1.80972	-1.74946	-1.63883	-1.82882	-1.90962	-1.64478	-1.68969	-1.87074	-1.87894	-1.87042	-1.67491	-1.83108	-1.86488	-1.73903	-1.74803	-1.87337	0.170828	-0.0958564	0.981258	NA	0.306462	-1.28372	0.73024	NA	0.584773	-1.17215	0.653514	NA	0.192188	0.26208	0.948789	NA	0.106445
ENSMUSG00000001082	Mfsd10	2.54966	3.65084	1.93143	2.06281	2.96281	3.12497	2.29046	1.56127	3.09094	2.52588	3.56822	3.54147	3.35942	3.77289	3.52337	3.21742	2.78077	3.18432	3.90499	3.39399	3.93983	3.93233	5.27633	5.44144	5.32441	2.57511	3.4897	3.50456	3.29003	3.75538	5.34739	24.2628	-0.0836654	0.833106	0.926273	19.2891	0.286783	0.567459	0.693303	32.9731	-0.171919	0.632063	0.704458	78.0981	-2.25193	1.84898e-19	9.11074e-19	13.6306
ENSMUSG00000001089	Luzp1	6.49068	6.22258	7.0942	6.10744	6.6552	6.53888	7.04266	6.8617	6.75843	6.97907	7.64554	7.65239	7.74994	7.84083	7.8349	7.7935	8.2257	8.35371	8.7039	6.54508	6.74226	6.36956	6.78118	6.81058	6.7244	6.67508	7.68262	7.82307	8.42777	6.5523	6.77206	504.986	-0.205679	0.0649056	0.198683	592.017	-0.843733	2.02037e-06	1.17384e-05	394.407	1.80247	1.167e-26	1.04239e-25	355.687	1.55898	8.11214e-29	5.49873e-28	431.717
ENSMUSG00000001095	Slc13a2	-2.33454	-2.33809	-2.32473	-2.32074	-2.3269	-2.32951	-2.34456	-2.33642	-2.33958	-2.34007	-2.35642	-2.35646	-2.35219	-2.34808	-2.35343	-2.34156	-2.33545	-2.35084	-2.34349	-2.35235	-2.35122	-2.3543	-2.34773	-2.32054	-2.3477	-2.33351	-2.35502	-2.34769	-2.34326	-2.35262	-2.33866	0	NA	NA	NA	0	NA	NA	NA	0	NA	NA	NA	0.201935	-1.6615	0.683878	NA	0
ENSMUSG00000001098	Kctd10	6.24526	5.476	6.0768	5.51078	4.55595	5.43921	5.97841	5.69604	5.44129	5.90554	6.08599	6.19903	6.15368	5.69502	6.04016	6.00804	6.32877	5.93937	5.88436	5.97968	5.93996	5.87799	7.17365	7.0195	7.04693	5.63253	6.14623	5.91441	6.05083	5.93254	7.08003	134.413	0.29634	0.119331	0.301298	122.621	0.307048	0.164871	0.277826	162.691	0.548191	0.00216328	0.00450996	244.967	-0.943208	6.32783e-10	2.0077e-09	76.215
ENSMUSG00000001100	Poldip2	6.11366	6.24757	6.82844	7.02874	6.33549	6.35749	6.35047	6.53138	6.28196	6.58841	6.04629	6.07476	5.9648	6.13775	6.12969	5.94646	6.20237	6.34631	6.12483	6.58822	6.64649	6.66743	6.203	6.20146	5.97548	6.46636	6.02861	6.0713	6.2245	6.63405	6.12665	123.282	-0.0892387	0.634541	0.811849	113.396	-0.137454	0.504635	0.638504	197.102	-0.60074	0.000274748	0.000650817	128.335	0.167884	0.387336	0.454368	80.4694
ENSMUSG00000001103	Sebox	-0.48703	-0.55986	-0.28521	-0.203344	-0.329848	-0.383478	-0.204211	-0.525569	-0.578066	-0.0934852	0.108188	0.105825	0.16209	0.458266	0.117384	-0.13166	0.034437	0.340974	0.920095	-0.637968	-0.633914	-0.644391	-0.619996	-0.623522	-0.619857	-0.36501	0.125368	0.147997	0.431836	-0.638758	-0.621125	4.06346	-0.23438	0.802178	0.90962	4.74949	-0.86801	0.325211	0.46663	2.47743	4.61656	0.00355104	0.00712739	2.14857	4.20483	0.00952727	0.0161681	3.44533
ENSMUSG00000001105	Ift20	4.63304	4.23299	5.74429	5.58552	4.26148	4.88122	4.79583	3.87738	4.69744	4.55026	5.45102	5.75402	5.88011	5.79908	5.47639	5.55999	4.7941	5.53653	5.58023	5.3166	5.5086	5.42276	6.03964	5.94817	5.97485	4.72594	5.69505	5.61182	5.30362	5.41598	5.98755	114.607	0.101491	0.638084	0.814283	87.9	0.593054	0.0505602	0.107565	126.769	0.644623	0.00368292	0.00737848	137.701	-0.079776	0.698647	0.747454	57.909
ENSMUSG00000001119	Col6a1	3.8145	4.76164	4.71681	5.78188	4.22678	4.27084	3.74539	4.12263	3.96844	4.17216	3.8375	3.83053	3.83468	3.50543	2.19216	2.22167	1.62177	2.45538	2.36978	3.22266	3.62119	2.01121	1.9362	2.70123	2.6312	4.35811	3.83424	2.63975	2.14897	2.95169	2.42288	21.8933	1.57153	0.00199851	0.0127604	16.5294	2.8512	9.64618e-06	5.07319e-05	30.0838	1.32993	0.00688838	0.0131671	21.6967	2.56048	6.9221e-07	1.80089e-06	4.54448
ENSMUSG00000001120	Pcbp3	5.43743	5.94889	6.09896	5.41897	5.11325	5.8422	5.58061	5.57809	5.62246	5.90701	6.4559	6.48408	6.32867	6.19426	6.14413	5.73726	6.23102	6.17023	6.04863	5.69931	5.67677	5.38801	4.89154	4.42607	4.34478	5.65479	6.42288	6.02522	6.14996	5.58803	4.55413	176.408	0.479614	0.00682231	0.0355216	158.483	0.536566	0.0038871	0.0118642	186.309	1.39894	4.64805e-13	2.26886e-12	131.569	3.01113	1.04892e-31	7.71414e-31	90.4587
ENSMUSG00000001123	Lgals9	3.45602	3.46024	4.9263	1.66811	4.31818	1.31824	3.09048	2.75842	3.08669	3.31195	1.08515	0.7315	1.23945	0.554831	0.345136	0.820055	1.07274	0.44554	1.73892	1.49711	2.26822	1.77115	9.42497	9.61096	9.63898	3.13946	1.0187	0.573341	1.08573	1.84549	9.5583	0.819964	2.62276	0.220816	NA	1.25842	0.442879	0.805737	NA	3.84582	-1.41418	0.157763	0.2222	845.082	-9.91558	1.13906e-70	2.17499e-69	0.359308
ENSMUSG00000001127	Araf	5.7872	6.54475	6.67051	6.6549	6.16823	7.01633	6.03678	5.44057	5.90645	5.87335	7.1405	7.13921	6.96729	7.20124	6.87005	7.09684	7.99009	7.80084	7.67395	7.35255	7.48368	7.36994	6.34152	6.63411	6.62284	6.20991	7.08234	7.05604	7.82163	7.40206	6.53282	291.651	0.0294608	0.844252	0.932228	367.778	-0.815382	5.63281e-07	3.55681e-06	407.324	-0.173578	0.230343	0.305353	244.871	1.06954	5.82481e-10	1.8537e-09	254.187
ENSMUSG00000001128	Cfp	2.84473	0.163557	2.60441	2.42557	2.06035	2.83457	0.634043	1.01506	1.67024	1.64064	-0.44261	-0.497073	-0.250297	0.476017	-0.284454	0.059203	1.06127	-0.212524	1.11869	-0.254859	-0.223194	0.210331	5.12659	4.97024	4.44367	1.78932	-0.39666	0.0835887	0.655811	-0.0892408	4.84683	0.231659	-2.06101	0.612854	NA	0.976144	-4.01984	0.115117	NA	0.159962	-1.24927	0.759488	NA	61.6063	-9.75053	7.66085e-16	3.21989e-15	0.825009
ENSMUSG00000001131	Timp1	-1.06927	-1.11709	-0.936748	-0.882992	-0.96606	-1.00128	-1.20443	-1.09458	-1.13729	-1.14391	-1.0779	-0.984699	-0.986853	-1.21595	-1.22523	-1.16394	-1.08157	-1.22107	-1.19003	-0.52611	-0.17369	-0.0177358	-1.21527	-0.929426	-1.2152	-1.05537	-1.01648	-1.20171	-1.16423	-0.239178	-1.11996	0.446129	1.75525	0.511116	NA	0.402897	1.47117	0.598761	NA	4.50556	-2.77617	0.00910893	0.0170328	0.705774	1.14788	0.599731	NA	0
ENSMUSG00000001134	Uxt	3.30975	1.69274	1.05441	1.16407	2.83282	2.42681	2.48656	2.05309	2.43425	1.6029	1.49339	1.47378	0.867615	1.26818	0.834642	1.19951	0.820851	1.16412	1.69955	1.84536	2.46555	2.49546	2.09398	2.74995	3.01254	2.10574	1.27826	1.10078	1.22817	2.26879	2.61882	2.56813	0.785772	0.52765	0.738697	2.50688	0.335473	0.792471	0.863524	9.07484	-1.68519	0.0166725	0.0296385	10.8045	-2.24602	0.00106825	0.00207192	1.36336
ENSMUSG00000001138	Cnnm3	5.22368	5.3418	5.63718	5.02104	4.08145	5.85657	5.06971	5.96403	5.36443	5.5746	4.74655	4.8637	4.76349	4.549	4.72141	4.78604	5.45908	5.05446	5.48297	6.22937	6.34029	6.27958	5.46246	5.62817	5.63934	5.31345	4.79124	4.68548	5.33217	6.28308	5.57665	44.441	0.159292	0.590782	0.782223	54.3973	-0.619739	0.0358038	0.0808914	140.118	-1.84226	1.07217e-20	7.5785e-20	73.2713	-0.822699	0.000468173	0.000946379	36.2942
ENSMUSG00000001143	Lman2l	4.43392	3.72382	4.26267	6.22544	4.52139	5.681	5.34328	5.35946	5.0135	5.3452	5.20116	5.27841	5.1737	5.72186	5.41461	5.20867	6.32495	5.97418	6.0782	5.69136	5.88586	5.98363	6.23503	6.56008	6.35546	4.99097	5.21776	5.44838	6.12578	5.85362	6.38352	79.0328	-0.383769	0.105713	0.277362	99.0293	-1.09089	1.40122e-06	8.32369e-06	115.65	-0.652624	0.00172954	0.00366236	135.612	-1.30638	4.50669e-11	1.52151e-10	74.9902
ENSMUSG00000001150	Mcm3ap	7.42935	6.72884	7.18425	6.42291	6.82571	6.98007	7.07698	7.07765	6.83486	6.91667	6.44866	6.43225	6.29607	6.04058	6.36965	6.21692	5.97433	5.68633	5.42145	5.51568	5.31056	5.59251	6.12163	6.17612	6.09044	6.94773	6.39233	6.20905	5.69404	5.47292	6.1294	156.937	0.229301	0.202363	0.425023	111.607	1.17784	1.02515e-06	6.20528e-06	147.57	1.57716	7.81014e-15	4.2101e-14	155.644	0.689389	0.000114874	0.000247858	68.9715
ENSMUSG00000001151	Pcnt	6.08273	6.67601	6.45369	6.53545	6.99201	6.13789	6.24761	6.11908	6.62242	6.39392	5.69513	5.45606	5.66975	5.69424	5.83763	5.85282	6.06867	5.63469	5.79141	5.40954	5.44502	5.45333	6.00178	6.07956	6.44974	6.42608	5.60698	5.7949	5.83159	5.43596	6.17703	95.6602	-0.286242	0.178923	0.392145	83.2244	-0.143552	0.576303	0.701489	95.8478	0.502321	0.0240291	0.0414523	118.58	-0.519246	0.0225349	0.0358723	63.3234
ENSMUSG00000001155	Ftcd	-2.22034	-2.2247	-2.20826	-2.20336	-2.21093	-2.21414	-2.23266	-2.22265	-2.22654	-2.22714	-2.22102	-2.20521	-2.24205	-2.23699	-2.24358	-2.22897	-2.22146	-2.24039	-2.23135	-2.24226	-2.24086	-2.24447	-2.23657	-2.23759	-2.23653	-2.21907	-2.22276	-2.23652	-2.23107	-2.24253	-2.2369	0.275301	1.1126	0.74723	NA	0.24891	0.819085	0.833537	NA	0.358446	1.88785	0.560179	NA	0.311651	1.4724	0.66782	NA	0
ENSMUSG00000001156	Mxd1	4.0377	3.81248	5.01285	2.68582	4.76306	3.54386	3.82561	3.36161	3.60878	4.47622	4.69965	4.54866	4.28511	4.74424	3.97289	4.82555	4.80101	4.63439	4.33757	4.62557	5.03368	4.67554	4.72195	4.97294	4.9611	3.9128	4.51114	4.51423	4.59099	4.77826	4.88533	50.1881	-0.0274985	0.933057	0.974788	43.4357	0.0693898	0.834895	0.8915	66.6111	-0.120614	0.666472	0.734536	59.4228	-0.199537	0.46818	0.53467	30.9965
ENSMUSG00000001157	Gmcl1	5.83712	5.90314	5.18568	5.46592	5.678	5.72916	5.29756	5.92157	5.6843	5.66988	4.99696	5.1223	5.21421	4.93319	4.99479	5.05065	3.90483	4.7191	4.65279	4.76947	4.92713	4.76901	5.11265	5.03306	4.93527	5.63723	5.11116	4.99288	4.42557	4.82187	5.02699	64.3642	0.161088	0.520378	0.73373	44.79	1.02165	0.00343298	0.0106409	72.0653	0.671007	0.00689301	0.0131744	66.8324	0.42864	0.0853731	0.12139	28.5676
ENSMUSG00000001158	Snrnp27	5.21587	5.92785	5.7107	6.36788	5.03586	4.86769	5.54607	4.77717	4.93175	4.89965	5.88016	5.84996	6.00888	5.97473	5.55285	5.74073	6.0505	6.07757	6.37257	6.12243	6.25606	6.06402	6.37522	6.56256	6.67226	5.32805	5.913	5.7561	6.16688	6.1475	6.53668	117.197	0.194475	0.342085	0.584919	121.493	-0.214843	0.311159	0.451119	167.36	-0.0822919	0.650228	0.720867	173.631	-0.55213	0.00189342	0.0035623	79.216
ENSMUSG00000001166	Oas1c	-0.487	-0.557045	-0.292895	-0.214159	-0.335827	-0.387406	0.0548414	0.339631	0.462687	0.205436	-0.0956464	0.0105436	0.138626	-0.288664	-0.630335	-0.583596	-0.50502	-0.34053	-0.190616	-0.62711	-0.623505	-0.632809	0.147976	0.405488	-0.610961	-0.121174	0.0178412	-0.500865	-0.345389	-0.627808	-0.0191657	1.84238	2.62397	0.111232	0.287564	1.86592	1.58245	0.284513	0.421544	2.09949	4.36725	0.00825094	0.0155621	3.47767	0.104035	0.922999	0.939034	0.428419
ENSMUSG00000001168	Oas1h	0	0	0	0	0	0	0	0	0	0	0	0	0	0	0	0	0	0	0	0	0	0	0	0	0	NA	NA	NA	NA	NA	NA	NA	NA	NA	NA	NA	NA	NA	NA	NA	NA	NA	NA	NA	NA	NA	NA	NA
ENSMUSG00000001173	Ocrl	7.85542	7.01106	7.11787	7.08738	7.07615	7.17817	7.44691	7.61015	7.31391	7.31356	6.64422	6.93327	6.79741	6.78044	7.0191	6.97663	6.57191	6.75756	6.50001	6.40918	6.39838	6.34191	6.01451	6.0351	5.82858	7.30106	6.79163	6.92539	6.60983	6.38316	5.95939	236.32	-0.196427	0.221377	0.450104	174.073	0.401665	0.0482689	0.10337	223.966	0.836688	2.50973e-06	7.47244e-06	167.724	1.52387	2.74245e-14	1.07735e-13	130.055
ENSMUSG00000001175	Calm1	10.8196	11.1647	11.7023	10.7067	10.621	10.6809	11.0632	10.4246	10.7595	10.8516	12.3726	12.4582	12.7484	12.5503	12.678	12.6736	12.5251	12.8002	13.0545	11.9878	11.9119	11.5726	11.1053	11.1003	11.0226	10.8794	12.5264	12.634	12.7933	11.8241	11.0761	15289.1	-0.141623	0.205509	0.429422	14101.4	-0.198566	0.308886	0.448612	13690.3	1.16952	5.42885e-11	2.31321e-10	9898.35	2.28703	8.71195e-63	1.41776e-61	10208.7
ENSMUSG00000001211	Agpat3	7.52704	7.89234	7.55556	7.833	7.64701	7.58794	8.03265	8.0435	7.85206	8.05078	6.70663	6.78438	6.74378	6.76173	6.699	6.62715	7.55857	7.39601	7.2657	8.89024	8.99239	9.22888	7.40524	7.47599	7.42113	7.80219	6.74493	6.69596	7.40676	9.03717	7.43412	163.562	0.0539807	0.744876	0.876687	206.908	-0.786812	5.11051e-06	2.8011e-05	906.751	-2.87426	6.19752e-81	2.51724e-79	245.346	-0.676472	3.24268e-06	8.0305e-06	141.389
ENSMUSG00000001225	Slc26a3	-0.307746	-0.82656	-0.607	-0.541556	-0.642685	-0.685557	-0.53063	0.0026257	-0.851148	-0.859202	-0.630868	-0.933122	-0.916846	-0.372647	-0.91949	-0.176185	-0.783317	-0.913759	-0.892747	0.0243014	-0.292044	-0.257833	-0.905789	-0.908044	-0.59266	-0.584946	-0.826945	-0.489441	-0.863274	-0.175192	-0.802164	1.40536	-2.3368	0.217002	NA	0.184002	0.437382	0.913787	NA	2.63753	-3.04241	0.0373047	0.0618512	0.444945	0.126072	0.967818	NA	0.742579
ENSMUSG00000001227	Sema6b	6.65639	6.58464	6.5196	6.09724	5.90864	6.75402	6.40464	6.14699	6.0033	6.31978	6.76137	6.63805	6.49312	6.82903	6.7614	6.32383	6.48287	6.26443	6.36589	5.62975	5.54478	5.49385	4.4512	5.03258	4.74598	6.33952	6.63085	6.63809	6.37106	5.55613	4.74325	230.572	-0.062103	0.71898	0.863962	174.444	0.537026	0.0056888	0.0166096	191.436	1.77084	2.30077e-20	1.5952e-19	143.592	3.07095	8.97829e-33	6.83922e-32	122.49
ENSMUSG00000001228	Uhrf1	-0.786889	-0.872156	-0.550602	-0.454756	-0.602864	-0.665652	-0.947157	0.18204	-0.902988	-0.908016	-1.03027	-1.03877	-0.995627	-0.535401	-1.00231	-0.92325	-0.808825	-0.987969	-0.939416	-0.381424	-0.609313	-0.254876	0.886909	0.786345	0.77467	-0.650904	-1.02155	-0.820321	-0.91207	-0.415204	0.815975	0.231659	-2.06101	0.612854	NA	0	NA	NA	NA	1.05746	-3.69041	0.0709194	0.109553	8.66614	-6.91917	1.69142e-07	4.61224e-07	0.14232
ENSMUSG00000001229	Dpp9	7.91598	7.18049	6.98697	6.74194	7.33754	6.96637	7.25777	7.49826	7.10312	7.51813	7.09484	7.05953	6.9662	6.81508	6.82282	6.57957	6.4233	6.34671	6.04968	5.55033	5.68125	5.77425	6.42647	6.37574	6.45578	7.25066	7.04019	6.73916	6.27323	5.66861	6.41933	249.874	0.379086	0.0104616	0.0498955	183.288	1.23193	3.2264e-10	3.07044e-09	224.418	2.22495	1.59999e-34	1.9097e-33	231.407	1.18051	9.04247e-14	3.47939e-13	105.175
ENSMUSG00000001240	Ramp2	2.12769	2.81891	2.59681	2.01206	2.93276	3.34483	3.28933	2.91847	2.73082	2.88088	2.81635	2.80211	2.94567	4.58172	4.24174	4.7315	2.74897	2.51223	1.29573	5.40827	5.31836	5.71303	3.42855	3.02875	3.23603	2.76526	2.85471	4.51832	2.18564	5.47989	3.23111	40.1206	-2.47784	1.21075e-12	3.70467e-11	7.919	1.21558	0.127655	0.227744	96.5814	-3.51046	1.03682e-32	1.15874e-31	15.3107	-0.311271	0.516421	0.580915	22.7318
ENSMUSG00000001247	Lsr	2.43131	2.20569	4.03742	1.60309	1.33276	1.72544	1.47364	1.68798	2.11221	0.786261	0.736422	-0.211227	0.888247	-0.00700323	-0.0970999	0.117776	0.245048	0.399153	0.0793207	0.650073	1.42779	0.974361	1.09808	1.26042	0.843824	1.93958	0.471147	0.00455769	0.241174	1.01741	1.06744	0.918498	2.76748	0.217722	NA	0.982441	1.56932	0.487169	NA	3.42555	-0.982356	0.395404	0.481121	2.92287	-0.95304	0.430736	0.49739	0.106445
ENSMUSG00000001248	Gramd1a	6.99203	6.75028	7.19349	6.40278	6.85976	7.10317	6.30944	6.70895	6.59953	6.745	6.41516	6.51294	6.38617	6.43869	6.70678	6.35857	6.63681	5.88528	6.06897	5.93481	5.9853	6.06699	6.1816	6.4982	6.62159	6.76644	6.43809	6.50135	6.19702	5.9957	6.4338	178.203	-0.132686	0.442682	0.675028	134.595	0.488201	0.0714132	0.143169	172.099	0.882336	7.33908e-07	2.30403e-06	175.306	0.30298	0.115898	0.158691	97.2643
ENSMUSG00000001249	Hpn	-0.444786	1.0325	-0.190552	-0.0874252	1.38974	1.24694	-0.606543	-0.493334	0.44624	-0.562878	-0.247126	-0.723623	-0.668588	-0.637195	-0.677122	-0.577865	-0.468388	-0.658804	-0.596602	-0.298809	0.00291925	-0.34337	1.26589	0.666918	0.709622	0.172991	-0.546445	-0.630727	-0.574598	-0.213086	0.880809	0.203007	0.719104	0.858727	NA	0.184002	0.437382	0.913787	NA	1.01654	-1.37725	0.48535	0.568738	4.47173	-4.08058	0.0018948	0.00356447	0
ENSMUSG00000001260	Gabrg1	6.52657	6.54908	5.86425	6.9113	6.89004	6.4174	6.69431	6.9559	6.75778	6.41417	5.37531	5.42849	5.40671	5.46801	5.15968	5.75456	5.06866	5.11717	5.46911	9.4566	9.33058	9.29613	4.98473	5.24656	5.0172	6.59808	5.40351	5.46075	5.21831	9.3611	5.08283	67.8567	-0.0863261	0.740012	0.874649	50.9009	0.42177	0.154359	0.264483	1341.06	-4.94426	1.71821e-241	4.38357e-239	57.5238	0.800864	0.00288423	0.00528931	37.0633
ENSMUSG00000001270	Ckb	10.0357	9.97264	9.43797	9.86628	10.1178	9.93591	10.2142	10.1942	10.0024	10.1574	10.0261	9.85043	9.82936	9.37269	9.12431	9.00772	11.2815	11.0135	10.5179	11.3638	11.4838	11.9975	10.2364	10.2728	10.3584	9.99345	9.90195	9.16824	10.9376	11.615	10.2892	1311.4	1.03334	4.51666e-16	1.85378e-14	2743.49	-1.28708	1.20768e-08	9.63197e-08	5938.84	-2.0588	8.07816e-27	7.25125e-26	2157.41	-0.216908	0.0661493	0.0962899	1628.15
ENSMUSG00000001280	Sp1	3.22974	4.87356	3.76426	4.29662	5.16321	4.88981	4.3717	4.32425	5.30751	4.68204	4.03745	3.65895	4.11378	3.4075	3.87574	4.07128	4.47738	4.89856	5.01977	6.55682	6.66942	6.69512	7.60895	7.6916	7.66908	4.49027	3.93673	3.78484	4.79857	6.64045	7.65654	20.0881	0.237195	0.602416	0.79049	31.4104	-1.19812	0.00193412	0.00639861	173.445	-3.53629	9.23672e-53	1.88051e-51	331.484	-4.74918	6.35274e-118	3.02341e-116	20.8071
ENSMUSG00000001281	Itgb7	-0.0838939	-0.136271	1.56264	2.16697	1.81316	0.0572083	0.638812	0.992478	-0.157625	0.828538	-0.374965	-0.141383	0.075336	0.18895	0.0434205	-0.18496	1.34714	1.30667	1.73053	0.0710377	-0.301372	0.276856	-0.263039	0.481077	1.1086	0.768202	-0.147004	0.0158037	1.46145	0.0155071	0.442212	0.648141	-0.877634	0.705873	NA	4.89821	-4.51557	0.00042205	0.00161999	0.843669	-0.759314	0.719098	0.779023	1.76265	-2.49104	0.151046	0.200356	3.49915
ENSMUSG00000001285	Myg1	4.81185	4.90972	5.5708	5.09374	4.21468	4.51374	5.20891	4.5444	5.1696	4.94862	5.09033	5.04762	5.04646	5.10842	5.13198	5.29994	5.77511	5.26305	5.28566	5.12541	4.98076	5.33981	5.62623	5.42847	5.30199	4.89861	5.06147	5.18012	5.44127	5.14866	5.45223	70.4225	-0.173373	0.464201	0.692786	69.5586	-0.369691	0.175102	0.291187	82.6133	0.103986	0.660112	0.729448	81.6542	-0.255314	0.267791	0.329262	51.0535
ENSMUSG00000001288	Rarg	1.419	2.51104	2.33354	3.92849	2.21875	2.41097	0.575394	0.735693	1.59016	1.5676	1.90274	1.58743	1.92986	0.927281	0.76838	0.631132	0.75636	1.78456	1.66775	2.50168	2.57337	2.6236	1.46608	2.2328	2.53583	1.92906	1.80668	0.775598	1.40289	2.56621	2.07824	3.94557	2.97891	0.0202211	0.083669	4.9036	0.703587	0.439693	0.580181	14.2303	-1.0784	0.0359233	0.0598038	9.05135	-0.34378	0.607879	0.666305	1.41785
ENSMUSG00000001289	Pfdn5	5.55458	5.35367	4.27349	6.15497	5.71661	5.47042	5.22597	5.01159	5.43803	5.29738	6.16323	6.13681	6.10811	6.399	6.18598	6.08797	6.31628	6.42526	6.43265	6.83925	6.84856	6.79132	7.38828	7.21738	7.37335	5.34967	6.13605	6.22432	6.3914	6.82638	7.32634	150.282	-0.153518	0.383102	0.623049	138.303	-0.20511	0.259531	0.393544	242.96	-0.68724	7.69371e-06	2.18209e-05	277.187	-1.28179	4.90976e-18	2.28624e-17	100.315
ENSMUSG00000001300	Efnb2	5.56237	5.91064	5.21426	4.53737	5.33917	5.30701	5.14851	5.66843	5.27822	5.43546	6.41114	6.29458	6.50061	5.98709	5.85528	6.11398	5.23875	5.37419	5.69365	6.21397	6.16923	6.02267	4.65683	4.70137	4.78917	5.34014	6.40211	5.98545	5.43553	6.13529	4.71579	176.883	0.559319	0.00105262	0.00743659	128.991	1.45183	2.33005e-10	2.24945e-09	226.727	0.602311	0.000443004	0.0010195	136.527	2.72511	1.83472e-32	1.38156e-31	68.2667
ENSMUSG00000001305	Rrp15	1.51337	2.53237	1.79956	1.91968	3.41006	3.00898	2.69131	2.62196	3.23345	2.63303	2.94944	2.91113	2.48281	3.31578	3.21653	3.6234	2.03211	3.47156	3.62089	3.4488	3.44619	3.66544	4.83976	4.17555	4.26351	2.53638	2.78113	3.38524	3.04152	3.52014	4.42627	18.3626	-0.918486	0.0463892	0.154846	13.664	-0.617623	0.324718	0.466108	23.1116	-0.879718	0.0337813	0.0565329	39.1505	-2.16807	2.76547e-08	7.94391e-08	13.1846
ENSMUSG00000001313	Rnd2	4.57137	4.02927	2.23335	5.37829	4.99515	5.38509	5.11298	4.71765	4.85912	5.3755	2.66225	2.7576	2.86255	1.45867	1.63386	1.65216	3.40172	4.42465	4.24994	5.31507	5.73325	5.95761	3.03449	3.16987	3.38375	4.66578	2.7608	1.58156	4.02544	5.66864	3.19604	4.30463	4.01555	0.00396253	0.0226754	18.44	-2.0531	7.28897e-05	0.000332841	94.2687	-4.05968	3.97841e-32	4.33931e-31	10.9991	-0.440602	0.430619	0.497328	10.3508
ENSMUSG00000001323	Srr	7.50258	6.96342	7.69775	7.35817	6.72085	6.16693	6.9277	7.35845	7.03288	7.19358	7.50765	7.65652	7.74182	7.74782	7.9298	7.90103	5.63723	6.00497	6.14868	6.91588	6.97395	6.75857	5.39375	5.73974	5.84577	7.09223	7.63533	7.85955	5.93029	6.8828	5.65975	532.162	-0.311407	0.01126	0.0528385	251.933	2.48597	1.49504e-32	5.81326e-31	439.109	1.26376	7.61693e-16	4.30344e-15	299.846	3.1091	7.0996e-56	9.83641e-55	207.504
ENSMUSG00000001333	Sync	-0.444787	1.04936	-0.224717	-0.135449	0.877433	-0.331871	-0.138594	-0.486811	-0.00656926	-0.541359	0.428496	0.331892	-0.611354	-0.591311	-0.61669	-0.551705	0.5032	-0.0435202	-0.56445	-0.0870729	0.131562	-0.347328	-0.589469	-0.232615	0.0527578	-0.0383364	0.0496777	-0.586569	-0.0349236	-0.100947	-0.256442	1.69562	3.72476	0.043701	0.148171	2.75627	0.55178	0.7069	0.803592	3.35048	1.04686	0.37416	0.459241	2.55206	1.65887	0.255774	0.316165	0.859652
ENSMUSG00000001334	Fndc5	4.64804	5.47743	5.09479	5.09764	6.0771	6.55795	5.74659	5.91162	6.33103	6.13047	4.92726	4.92307	4.8759	5.59485	5.27772	5.26185	6.99158	6.70622	6.52398	5.75046	6.03934	6.07982	3.85218	4.83621	4.11317	5.70727	4.90874	5.37814	6.74059	5.95654	4.26719	64.8613	-0.718257	0.00433877	0.024391	139.956	-2.38802	3.21993e-26	9.4755e-25	108.613	-1.25895	1.26196e-08	4.57183e-08	39.7509	1.19924	0.00229804	0.00427152	107.327
ENSMUSG00000001348	Acp5	-0.0301478	-0.151951	2.53247	0.511077	1.93594	0.167412	1.22122	-0.0999496	-0.198938	-0.214383	0.74107	0.757048	0.45177	-0.467272	0.385224	-0.261279	-0.0658941	-0.553186	0.452369	-0.599714	-0.564884	-0.658647	4.90361	6.596	6.4108	0.567275	0.649963	-0.114442	-0.0555704	-0.607749	5.97013	1.68807	1.74562	0.279552	0.518771	1.49747	2.11238	0.216435	0.343172	1.78613	4.16485	0.015577	0.0278821	75.7902	-5.52851	2.65749e-28	1.76863e-27	0.375444
ENSMUSG00000001349	Cnn1	-0.941716	-0.0532193	0.833714	-0.635077	-0.771817	-0.829785	-1.12759	-0.38518	-1.05368	-0.495259	-1.20123	-0.980245	-1.17069	-0.709007	-0.829811	-0.53765	-0.961969	-1.16391	-1.11929	-0.807022	-0.31556	-0.84767	-1.14693	-1.15166	-0.699847	-0.545961	-1.11739	-0.692156	-1.08172	-0.65675	-0.99948	0.846828	-2.56468	0.23731	NA	0.0784542	-0.379878	0.925828	NA	1.06646	-2.55087	0.202279	0.274183	0.311733	-0.69971	0.842383	NA	0.469184
ENSMUSG00000001366	Fbxo9	5.59895	5.64336	4.74043	6.28596	6.30884	6.18122	6.19995	6.25378	6.28169	6.1524	5.86303	5.88889	5.83064	5.65155	5.48015	5.17957	6.14087	6.09047	5.89785	5.55729	5.38421	5.37258	4.8583	4.83263	4.76779	5.96466	5.86085	5.43709	6.04306	5.43803	4.81957	102.044	0.540383	0.01106	0.0521371	114.081	-0.0926287	0.64705	0.759355	123.606	0.84671	2.49214e-05	6.70153e-05	87.9959	1.84853	1.13391e-14	4.55791e-14	66.6905
ENSMUSG00000001376	Vps50	7.85619	7.6577	7.83967	6.59301	7.83898	7.27875	7.76909	8.11229	7.85956	7.53846	8.22217	8.17143	8.25581	8.03493	8.17062	8.19783	7.19444	7.39589	7.654	7.22508	7.02081	6.99004	7.477	7.42016	7.46207	7.63437	8.21647	8.13446	7.41478	7.07865	7.45307	662.377	0.0927152	0.388563	0.627331	440.62	1.21296	1.77091e-12	2.12101e-11	572.518	1.81028	3.31946e-35	4.06298e-34	538.026	1.34875	1.1241e-28	7.58044e-28	289.907
ENSMUSG00000001380	Hars	6.89512	6.7957	6.46566	6.69931	6.31606	6.76612	6.69211	6.80379	6.34788	6.65123	7.25022	7.16883	7.26357	7.21685	7.32764	7.29631	7.16728	7.19219	7.27716	6.92301	6.87724	6.92502	7.12709	7.00246	7.01762	6.6433	7.22754	7.28027	7.21221	6.90842	7.04906	333.225	-0.090309	0.480113	0.705983	275.188	0.172931	0.241202	0.373085	341.6	0.683809	1.31745e-06	4.03364e-06	307.26	0.552266	9.29807e-05	0.000202562	196.155
ENSMUSG00000001383	Zmat2	6.51841	6.95965	6.97392	7.07696	6.52345	6.7595	6.56653	6.0153	6.13402	6.38341	8.21157	8.23061	8.35708	8.5983	8.41605	8.53424	7.75174	7.53608	7.86486	7.77199	7.81905	7.72412	7.8516	7.826	7.97565	6.59111	8.26642	8.5162	7.71756	7.77172	7.88442	846.986	-0.340418	0.00135254	0.00922948	521.415	0.885843	2.82088e-08	2.1323e-07	747.222	0.90424	1.0645e-12	5.07105e-12	662.383	0.814446	3.12953e-11	1.06547e-10	420.395
ENSMUSG00000001403	Ube2c	-0.663049	-0.747249	-0.407364	-0.303649	-0.463917	-0.531859	-0.81284	0.824857	-0.765171	-0.771055	-0.642985	-0.923599	-0.870892	-0.841348	-0.878987	-0.786457	-0.686786	0.0238923	-0.803664	0.129538	-0.196975	-0.293453	1.24818	0.551264	0.860223	-0.46413	-0.812492	-0.835598	-0.488853	-0.120296	0.886556	0.101503	-0.0958564	0.981258	NA	0.549426	-2.27842	0.453835	NA	1.60755	-3.19392	0.0692122	0.107352	9.30498	-6.03982	1.23406e-05	2.90802e-05	0.319335
ENSMUSG00000001415	Smg5	5.94197	6.15778	5.74971	6.61405	6.71199	6.33968	6.10683	6.43233	6.43346	6.27755	6.11231	6.17477	6.1688	6.17703	5.80879	5.96401	6.41142	6.31188	5.99615	6.14199	6.18775	6.24816	5.66352	5.79193	5.68129	6.27653	6.15196	5.98328	6.23982	6.19263	5.71225	132.999	0.218855	0.250829	0.48595	128.198	0.0287374	0.890957	0.929506	174.464	0.189107	0.267264	0.346616	122.67	0.939626	1.23378e-06	3.1531e-06	82.6308
ENSMUSG00000001416	Cct3	9.06381	8.19755	8.71689	8.1715	8.8168	8.56422	8.79562	9.01615	8.66907	8.82969	8.292	8.29708	8.3134	8.26317	8.4434	8.42203	8.44966	8.71675	8.56682	8.60657	8.41207	8.6396	8.73122	8.60803	8.51219	8.68413	8.30083	8.3762	8.57774	8.55275	8.61715	613.539	-0.125232	0.257904	0.494269	577.507	-0.24798	0.0707894	0.142227	795.418	-0.11126	0.397542	0.483325	696.166	-0.134651	0.278594	0.341002	415.743
ENSMUSG00000001418	Glmp	4.51632	5.38303	5.1734	4.8993	3.52208	4.94542	4.37557	4.57143	4.2862	5.24039	5.0991	5.32766	4.94166	4.88967	5.01375	4.98975	5.09657	5.56444	5.60583	6.76268	7.13311	7.12912	7.32653	7.44488	7.36814	4.69131	5.12281	4.96439	5.42228	7.0083	7.37985	59.0149	0.248813	0.356973	0.598439	63.9176	-0.307868	0.295474	0.4338	245.614	-2.27601	4.7746e-28	4.52202e-27	268.963	-2.66554	1.38298e-51	1.70204e-50	41.2183
ENSMUSG00000001419	Mef2d	7.62776	7.71079	6.82196	7.21476	7.64516	7.87801	7.63326	7.44023	7.29049	7.58803	8.32773	8.20049	8.11749	8.02586	7.91428	7.85593	7.86885	7.55425	7.19753	6.78313	6.79858	6.73861	7.33127	7.3746	7.41198	7.48505	8.21524	7.93203	7.54021	6.77344	7.37262	624.464	0.362828	0.00187802	0.0121083	473.498	1.04299	1.42873e-06	8.46922e-06	554.163	2.2554	1.35378e-53	2.83756e-52	542.234	1.45926	7.59752e-27	4.81624e-26	277.629
ENSMUSG00000001420	Tmem79	-0.87893	-0.937212	-0.717422	-0.651908	-0.753144	-0.796061	-1.02421	-0.909771	-0.961826	-0.969888	-0.411065	-0.77972	-0.780444	-0.706914	-0.60831	-0.994307	0.619907	-0.757559	-1.02047	-0.279576	-0.553113	-0.628883	-1.03437	-1.03678	-1.03427	-0.860037	-0.657076	-0.769844	-0.386042	-0.48719	-1.03514	1.40131	0.485044	0.76431	NA	3.21642	-1.43846	0.313655	0.453847	2.58635	-0.371924	0.750654	0.806786	0.9663	3.06987	0.142221	0.190172	2.06146
ENSMUSG00000001424	Snd1	8.02767	7.71173	8.66199	8.00988	7.26513	7.37822	7.40184	7.71656	7.42682	7.62554	7.86434	7.71662	7.76509	8.31859	8.14323	8.14822	7.55037	7.25616	7.18461	7.24474	7.10779	7.27537	8.29937	8.01908	8.42474	7.72254	7.78202	8.20335	7.33038	7.2093	8.24773	557.468	-0.58654	4.96553e-07	7.51955e-06	319.199	0.799272	4.56299e-06	2.52466e-05	430.856	1.04863	4.45365e-13	2.17592e-12	569.24	-0.330291	0.0373658	0.0571423	288.775
ENSMUSG00000001435	Col18a1	2.20418	3.11079	4.36833	4.9398	4.87995	3.47761	3.89989	3.98685	4.43474	4.9899	1.30865	0.669873	2.2308	1.09996	1.30743	2.70099	7.91988	8.06099	7.7691	3.284	3.79042	2.47398	3.26903	2.59408	3.00227	4.0292	1.40311	1.70279	7.91665	3.1828	2.95512	2.69396	-0.567167	0.690517	0.848241	429.96	-9.248	1.32094e-59	1.29664e-57	11.1017	-3.05464	0.000508085	0.00116158	6.92192	-2.48367	0.00882643	0.0150953	301.028
ENSMUSG00000001436	Slc19a1	3.98	3.54367	4.43209	2.26596	2.07172	3.83409	2.91939	3.2475	3.64774	2.86885	3.38408	3.65368	3.95444	3.19806	3.07659	3.68567	3.30488	3.89391	3.82524	4.30271	4.5557	4.3504	4.03767	4.26324	4.43081	3.2811	3.66406	3.32011	3.67468	4.40293	4.24391	22.4178	0.574216	0.196663	0.416971	22.7869	0.0539661	0.904601	0.938662	47.574	-0.844724	0.007768	0.0147158	36.5777	-0.563511	0.107299	0.148439	13.262
ENSMUSG00000001440	Kpnb1	7.87292	7.86329	8.05918	7.37449	7.49692	7.80929	7.65974	7.43038	7.46969	7.42675	8.51268	8.47417	8.45602	8.51967	8.49859	8.4372	8.32235	8.3525	8.27833	8.57823	8.51041	8.73644	9.59758	9.49977	9.68237	7.64627	8.48096	8.48515	8.31773	8.60836	9.59324	758.131	-0.0228025	0.818673	0.918762	601.588	0.378449	0.00133246	0.00458089	957.243	0.0714898	0.571342	0.649644	1369.47	-1.14802	7.40097e-26	4.53824e-25	418.322
ENSMUSG00000001441	Npepps	9.30466	8.69224	8.90109	8.80425	9.14166	8.73536	9.12629	9.26205	9.18013	9.20714	8.64234	8.77001	8.73214	8.70215	8.79767	9.02657	8.4621	8.71986	8.74788	9.00525	8.69729	8.98838	8.23391	8.23109	8.28701	9.03549	8.71483	8.84213	8.64328	8.89697	8.25067	880.812	-0.190518	0.10752	0.280709	682.456	0.237871	0.102581	0.19125	1073.4	-0.0122575	0.93348	0.951784	700.68	0.968172	8.69607e-17	3.82438e-16	508.384
ENSMUSG00000001444	Tbx21	-1.99533	-2.00845	-1.95898	-1.94423	-1.96702	-1.97668	-2.03241	-2.00227	-1.9102	-2.0158	-1.99863	-2.06712	-1.95688	-2.04545	-2.06511	-2.0213	-1.99871	-2.05567	-2.02846	-2.06128	-1.95329	-2.06534	-2.04418	-2.04725	-2.04406	-1.98114	-2.00754	-2.04395	-2.02761	-2.02664	-2.04516	0.272332	1.00002	0.775569	NA	0.245988	0.727195	0.855217	NA	0.557288	0.768006	0.770963	NA	0.307804	1.35809	0.69874	NA	0
ENSMUSG00000001445	Mrpl10	5.64009	4.722	5.71028	5.70404	4.76885	5.30355	4.89939	5.0525	5.34152	5.13909	5.41764	5.5696	5.10485	5.10028	5.36513	5.23194	5.30608	5.67483	5.44792	5.37138	5.37649	5.71739	5.6961	5.62197	5.51813	5.22813	5.36403	5.23245	5.47628	5.48842	5.61206	78.8723	0.198675	0.421687	0.658152	75.807	-0.00978854	0.972255	0.982196	106.659	0.0898573	0.715315	0.775688	95.7638	-0.00236403	0.9921	0.993867	49.137
ENSMUSG00000001467	Cyp51	6.9459	7.15597	6.88834	7.27923	6.62652	6.70559	7.00994	6.79425	6.76102	6.99937	6.90427	7.06349	7.12393	6.93926	7.09779	7.13469	6.98847	7.38494	7.61655	9.58079	9.46465	9.26326	6.87226	6.83927	6.7284	6.91662	7.03056	7.05724	7.32998	9.43624	6.81331	249.535	-0.0510893	0.734013	0.871324	246.283	-0.309935	0.159938	0.271533	1351.62	-2.90231	4.33373e-80	1.72168e-78	228.584	0.618092	0.000164346	0.000349669	172.965
ENSMUSG00000001472	Tcf25	9.37311	9.12194	8.8943	8.80357	8.96436	9.04344	9.12117	8.9952	8.92099	9.24428	9.31122	9.35238	9.34456	9.20987	9.17064	9.11266	9.16168	9.05387	8.82116	8.51356	8.45904	8.47218	8.26513	8.39578	8.35104	9.04824	9.33605	9.16439	9.01224	8.4816	8.33731	1325.9	0.2122	0.0174212	0.0743734	1073.43	0.586929	3.70463e-05	0.000176833	1274.84	1.42157	8.82834e-38	1.16815e-36	1054.24	1.69261	1.32429e-54	1.76943e-53	679.367
ENSMUSG00000001473	Tubb6	2.72272	1.17877	1.76683	2.52201	2.17982	2.38499	1.54575	1.98591	2.23612	1.49212	0.656614	0.355691	0.643341	0.305361	0.199101	0.451883	0.600991	0.689358	0.406788	2.36488	1.56755	2.57045	4.15869	3.77376	3.43555	2.0015	0.551882	0.318782	0.565712	2.16763	3.78934	0.460734	1.79669	0.496918	NA	0.568919	0.593566	0.796191	NA	7.43934	-3.56623	0.000269582	0.000639137	28.5753	-5.80538	9.37519e-13	3.44742e-12	0.106445
ENSMUSG00000001482	Def8	5.37013	4.94029	3.53718	5.47524	4.94567	5.73773	5.64565	5.46132	5.41752	5.05703	5.55977	5.33179	5.27702	5.11801	4.92446	4.65599	5.661	5.56905	4.37363	5.52197	5.66726	5.7158	5.12185	5.06315	5.10323	5.15877	5.38953	4.89949	5.20123	5.63501	5.09608	72.2402	0.661718	0.00908951	0.0445892	74.1335	0.261409	0.512612	0.64509	119.719	-0.0838416	0.689325	0.754376	80.4659	0.747873	0.00185724	0.0034963	40.8687
ENSMUSG00000001493	Meox1	-1.88784	-1.90449	-1.84173	-1.82302	-1.85193	-1.86418	-1.93488	-1.89665	-1.77986	-1.91382	-1.893	-1.97509	-1.97073	-1.95142	-1.97208	-1.92079	-1.89213	-1.96438	-1.92987	-1.9715	-1.96616	-1.8602	-1.94981	-1.9537	-1.68635	-1.86984	-1.94627	-1.9481	-1.92879	-1.93262	-1.86329	0.101503	-0.0958564	0.981258	NA	0.0920011	-0.379878	0.925828	NA	0.292439	-0.287479	0.936035	NA	0.543044	-1.61195	0.583169	NA	0
ENSMUSG00000001494	Sost	-1.82152	-1.85138	-1.73879	-1.70523	-1.75709	-1.54287	-1.90591	-1.83732	-1.86399	-1.15952	-1.97539	-1.97651	-1.97023	-1.93558	-1.9715	-1.88063	-1.82921	-1.95884	-1.89692	-1.97066	-1.73468	-1.97215	-1.93269	-1.93968	-1.93242	-1.71836	-1.97404	-1.92924	-1.89499	-1.8925	-1.93493	0	NA	NA	NA	0	NA	NA	NA	0.201892	-1.24927	0.759488	NA	0	NA	NA	NA	0
ENSMUSG00000001496	Nkx2-1	-0.835993	-0.901336	-0.654918	-0.0645322	-0.694968	-0.743085	-0.566115	0.0250621	-0.440296	0.137055	-1.04295	-1.04746	-1.02382	-1.00952	-1.0276	-0.965348	-0.852803	-0.467093	-0.990191	-0.332388	-0.141348	-0.134326	-1.0082	-1.01136	-1.00808	-0.473913	-1.03807	-1.00082	-0.770029	-0.202687	-1.00921	0	NA	NA	NA	0.30495	-2.77532	0.493744	NA	2.1709	-4.71936	0.00423251	0.00839509	0	NA	NA	NA	0.21289
ENSMUSG00000001497	Pax9	-2.3342	-2.33796	-2.32378	-2.31955	-2.32608	-2.32885	-2.34483	-2.33619	-2.33955	-2.34007	-2.35744	-2.35749	-2.35294	-2.34857	-2.35425	-2.34165	-2.33517	-2.3515	-2.3437	-2.35311	-2.35191	-2.35518	-2.34821	-2.34909	-2.31841	-2.33311	-2.35596	-2.34816	-2.34346	-2.3534	-2.33857	0	NA	NA	NA	0	NA	NA	NA	0	NA	NA	NA	0.213715	-1.6615	0.683878	NA	0
ENSMUSG00000001504	Irx2	-0.00926305	-0.0806015	0.301745	1.37254	0.228034	2.39717	2.00065	0.705647	2.08022	0.9854	-0.441645	-0.469005	-0.33745	-0.269057	-0.356769	-0.148827	-0.0277166	0.747194	2.06974	2.65928	2.66965	3.06906	-0.263064	-0.277489	-0.262501	0.998155	-0.416033	-0.258218	0.929737	2.79933	-0.267685	0	NA	NA	NA	2.78633	-5.6427	0.0029109	0.0091883	19.4463	-7.88658	2.57754e-10	1.04953e-09	0	NA	NA	NA	1.93622
ENSMUSG00000001506	Col1a1	3.0527	4.60172	3.32523	5.87435	5.59772	5.81785	6.17024	5.83957	4.14969	6.17675	2.7218	2.80417	2.66598	2.49665	1.86708	2.41119	3.40392	3.02885	2.91415	4.5886	4.16959	3.83108	3.52348	4.02198	3.64997	5.06058	2.73065	2.2583	3.11564	4.19642	3.73181	5.9758	1.09098	0.189347	0.406702	8.71928	-0.432053	0.498987	0.633585	27.9354	-2.10579	1.96159e-06	5.89633e-06	16.0096	-1.3363	0.00647523	0.0113037	4.80263
ENSMUSG00000001507	Itga3	6.03071	5.88997	6.18224	6.09654	6.37096	6.35698	5.67543	5.78185	5.65839	6.09496	5.4491	5.31616	5.31487	4.95479	5.25486	4.97488	7.5809	7.26023	7.20917	4.93652	5.09139	5.01641	4.14566	4.34721	4.44511	6.0138	5.36004	5.06151	7.3501	5.01477	4.31266	66.0088	0.392286	0.122426	0.306973	231.119	-2.51232	1.00887e-37	4.62794e-36	78.3061	0.760923	0.00135285	0.00291684	53.8239	1.9394	2.67579e-10	8.66786e-10	155.316
ENSMUSG00000001508	Sgca	-1.19991	-1.24078	-1.08664	-1.0407	-1.11169	-1.14179	-1.31543	-1.22154	-1.25804	-1.2637	-1.34892	-1.22954	-1.34193	-1.33648	-1.34334	-1.28082	-1.21042	-1.34028	-0.740133	-1.12959	-0.451579	-0.408074	-1.06165	-1.33719	-1.33592	-1.18802	-1.3068	-1.32021	-1.09694	-0.663081	-1.24492	0.0868986	-0.0958564	0.981258	NA	0.595988	-2.30925	0.443613	NA	2.79188	-4.0642	0.0113897	0.0208839	0.314244	-0.69971	0.841954	NA	0.359308
ENSMUSG00000001510	Dlx3	-1.45895	-1.71091	-1.60428	-1.5725	-1.62161	-1.64243	-1.76255	-1.6976	-1.72286	-1.72677	-1.81725	-1.81815	-1.81326	-1.79066	-1.81407	-1.73861	-1.46622	-1.81226	-1.53035	-1.46272	-1.81255	-1.50007	-1.78792	-1.79454	-1.78766	-1.65205	-1.81622	-1.78111	-1.60294	-1.59178	-1.79004	0	NA	NA	NA	0.717377	-3.51458	0.213778	NA	0.695607	-3.08862	0.229329	0.304084	0	NA	NA	NA	0.503035
ENSMUSG00000001517	Foxm1	0.353551	-0.269	-0.000601684	0.0909746	-0.0505353	-0.110526	0.573923	0.297991	-0.27987	-0.283321	0.199248	0.225761	-0.350793	0.2485	0.0993937	0.157124	-0.24732	-0.344929	-0.305824	0.559558	0.605484	0.483608	0.453853	1.03588	0.982712	0.0322585	0.0247388	0.168339	-0.299358	0.54955	0.824147	1.99085	-0.351104	0.796597	0.906897	0.760276	2.42176	0.355965	NA	3.84331	-1.19518	0.233395	0.308848	4.71271	-1.85197	0.0540831	0.0802837	0.709399
ENSMUSG00000001518	Itfg2	5.80334	4.59083	3.64015	4.16149	5.25955	4.92692	4.98323	5.44286	5.20885	5.36251	4.42291	4.04704	4.34352	4.41768	4.17855	4.17492	5.42031	4.77719	4.27799	3.92235	4.51126	4.53343	4.04837	4.38447	4.56823	4.93797	4.27116	4.25705	4.82516	4.32235	4.33369	34.498	0.00820129	0.980866	0.993167	42.8048	-0.739375	0.07595	0.15003	43.1979	0.129381	0.706865	0.768886	36.6633	0.198573	0.569128	0.629288	29.574
ENSMUSG00000001520	Nrip2	1.25039	-0.100075	1.40915	0.286423	0.832756	0.739647	0.272497	-0.0830207	1.01374	0.397275	0.391621	0.320171	0.503168	0.184301	0.607469	-0.13326	-0.0728744	1.16579	1.03108	0.0892918	-0.207443	0.698891	0.1925	-0.189804	0.461157	0.601878	0.404987	0.219503	0.707998	0.19358	0.154618	2.13277	0.328377	0.802681	0.909955	3.39865	-1.15829	0.277195	0.413714	2.63826	0.660072	0.594141	0.669922	2.07475	1.15008	0.402858	0.469916	2.10408
ENSMUSG00000001521	Tulp3	3.25252	4.23573	3.62045	4.53712	4.26183	4.86249	3.49199	2.65114	4.52006	4.09466	2.76013	2.96049	2.40387	2.76362	2.92832	3.15429	1.81477	3.4201	4.03451	6.37069	6.3732	6.42997	4.31055	4.04099	3.84316	3.9528	2.70816	2.94874	3.08979	6.39128	4.0649	9.45341	-0.320554	0.610077	0.795742	10.8029	-0.987108	0.211058	0.337198	170.619	-4.86402	1.0623e-64	2.98542e-63	21.0817	-1.77107	0.000114573	0.000247241	8.24148
ENSMUSG00000001524	Gtf2h4	4.3406	4.02193	2.44187	2.57384	4.4707	4.17029	3.81961	4.42786	3.83908	3.80781	4.09535	4.72097	4.70988	4.41802	4.20541	4.01511	4.49465	4.56523	4.17153	4.37232	4.40606	4.3218	4.41267	4.46724	4.47291	3.79136	4.50873	4.21285	4.41047	4.36673	4.45094	46.0047	0.431392	0.190579	0.408466	43.1392	0.320719	0.393407	0.536176	59.0911	0.500093	0.107584	0.158483	52.1276	0.437311	0.175069	0.227976	25.3338
ENSMUSG00000001525	Tubb5	10.4133	9.83305	9.72274	9.31334	9.64696	9.50505	10.0248	10.1152	9.80597	10.1121	10.3611	10.3681	10.4098	9.9497	10.0237	9.90172	9.6726	9.61798	9.43175	9.37979	9.374	9.24938	10.4598	10.2243	10.283	9.84925	10.3797	9.95838	9.57411	9.33439	10.3224	2524.14	0.545903	9.43379e-11	2.35003e-09	1926.14	1.24861	2.75358e-24	7.27909e-23	2565.39	1.67841	1.50715e-49	2.85484e-48	2997.12	0.381065	0.000940689	0.00183695	1031.71
ENSMUSG00000001542	Ell2	6.0297	5.55822	5.09586	5.74737	5.04749	5.78443	6.01026	6.31666	5.62762	5.84437	5.22513	5.08699	5.26636	5.07869	5.05119	5.0275	5.53488	5.54987	5.60766	4.29996	3.84284	4.11181	4.42274	4.61216	4.67024	5.7062	5.19283	5.05246	5.56414	4.08487	4.56838	68.2881	0.182885	0.451073	0.681714	75.2876	-0.373129	0.113517	0.207399	59.9195	1.92096	1.33179e-10	5.51495e-10	58.6199	1.23268	7.99646e-06	1.91354e-05	49.2874
ENSMUSG00000001552	Jup	7.0684	6.76641	7.36247	7.46978	7.32347	6.65825	7.18624	7.27829	7.33602	7.49957	6.97698	6.7981	6.83466	5.52619	5.9666	5.42945	7.96474	7.57558	7.32775	7.17799	7.12357	7.23026	8.00745	7.99026	8.3078	7.19489	6.86991	5.64074	7.62269	7.17727	8.10183	140.549	1.74905	1.35629e-15	5.39376e-14	284.68	-0.894709	5.483e-05	0.000254345	303.773	-0.176815	0.244794	0.321638	440.964	-1.35703	1.76241e-17	7.99172e-17	149.36
ENSMUSG00000001555	Fkbp10	3.63188	2.78893	3.48016	4.53433	2.68429	3.5674	2.36202	4.2489	2.8616	3.33931	0.88442	0.99312	1.24597	1.10521	0.403285	0.822478	1.05	1.31609	1.32582	6.70248	6.94741	6.71595	2.88873	2.10631	0.599905	3.34988	1.04117	0.77699	1.23063	6.78861	1.86498	1.03702	1.61603	0.403694	NA	1.29106	0.129108	0.935338	NA	273.101	-8.07695	1.46543e-45	2.50027e-44	4.29782	-1.92357	0.0917938	0.129438	0.534864
ENSMUSG00000001558	Klhl10	-1.10628	-0.806581	-0.98611	-0.937364	-1.01269	-1.04462	-1.22884	-1.12923	-1.16796	-0.325176	-1.25435	-1.02886	-0.860116	-1.24088	-1.2483	-1.19213	-1.11744	-1.24498	-1.21578	-0.863625	-1.01766	-0.559424	-0.96473	-1.24165	-1.24027	-0.974484	-1.04778	-1.2271	-1.19273	-0.813569	-1.14888	0.515454	1.92835	0.480037	NA	0.464883	1.65318	0.600743	NA	2.04919	-1.17529	0.406312	0.492229	0.796638	1.30146	0.574683	0.634406	0
ENSMUSG00000001566	Mnx1	-2.33421	-2.33797	-2.32381	-2.31959	-2.32611	-2.32888	-2.34482	-2.3362	-2.33955	-2.34007	-2.35741	-2.35745	-2.35291	-2.34855	-2.35422	-2.34164	-2.33518	-2.35148	-2.34369	-2.35308	-2.35188	-2.35514	-2.31849	-2.34907	-2.34816	-2.33312	-2.35592	-2.34814	-2.34345	-2.35337	-2.33857	0	NA	NA	NA	0	NA	NA	NA	0	NA	NA	NA	0.216226	-1.6615	0.683878	NA	0
ENSMUSG00000001569	Nom1	5.4288	5.57922	5.98559	5.14738	6.15231	5.52974	5.87472	5.2986	5.55935	5.43826	6.01689	5.84863	5.96047	5.93107	5.75211	5.98728	5.22496	5.36284	5.50345	5.27183	5.4624	5.43574	6.05125	6.02879	6.17826	5.5994	5.942	5.89015	5.36375	5.38999	6.0861	130.138	0.0690103	0.712946	0.860525	90.3099	0.957721	5.10983e-05	0.000238294	128.679	1.02891	3.52405e-07	1.13291e-06	144.254	0.111662	0.540265	0.603218	60.6532
ENSMUSG00000001576	Ergic1	6.90713	6.97989	6.2597	7.18513	6.9948	7.17728	6.89288	6.77491	6.80865	7.08451	7.52541	7.6098	7.58633	7.61115	7.47107	7.63073	8.26425	8.0133	8.19825	7.57932	7.84381	7.55729	7.91224	7.98563	7.99876	6.90649	7.57384	7.57098	8.1586	7.66014	7.96554	397.255	-0.00385926	0.975072	0.99112	455.711	-0.621543	1.70694e-05	8.61881e-05	494.854	0.122437	0.421529	0.508152	483.331	-0.216379	0.0711861	0.102956	316.821
ENSMUSG00000001583	Tnk1	-2.20933	-2.21451	-2.19497	-2.18914	-2.19814	-2.20196	-2.22397	-2.21207	-2.2167	-2.21741	-2.23986	-2.23994	-2.19414	-2.22912	-2.19596	-2.21958	-2.21066	-2.23316	-2.22241	-2.23537	-2.23371	-2.23822	-2.22862	-2.22983	-2.22857	-2.20782	-2.22465	-2.21489	-2.22208	-2.23577	-2.22901	0.329583	-1.03684	0.755167	NA	0.153987	-0.379878	0.925828	NA	0.222919	0.67431	0.868747	NA	0.192188	0.26208	0.948789	NA	0.097895
ENSMUSG00000001588	Acap1	-1.62459	-1.98945	-1.90765	-1.88327	-1.92095	-1.93692	-2.02906	-1.97923	-1.9986	-2.00161	-2.08553	-2.08613	-2.07578	-2.05061	-2.08334	-2.01069	-1.97334	-2.06751	-2.02253	-1.7649	-2.06983	-2.08372	-2.04851	-2.05359	-2.04832	-1.92713	-2.08248	-2.04822	-2.02112	-1.97282	-2.05014	0	NA	NA	NA	0	NA	NA	NA	0.375682	-2.18187	0.553716	NA	0	NA	NA	NA	0
ENSMUSG00000001604	Tcea3	-0.958512	-1.01631	-0.798359	-0.733395	-0.833782	-0.876339	-1.11415	-0.989094	-1.04071	-1.04871	-1.15135	-1.15478	-1.13666	-1.12555	-1.13959	-1.07292	-0.97338	-0.83699	-1.10445	0.297934	0.125111	0.133161	-1.12451	-0.553084	-0.777563	-0.940936	-1.1476	-1.11268	-0.971607	0.185402	-0.818387	0	NA	NA	NA	0.152475	-2.24404	0.581531	NA	5.28101	-6.0001	1.60427e-05	4.39432e-05	0.617584	-3.11664	0.253398	NA	0.106445
ENSMUSG00000001622	Csn3	0	0	0	0	0	0	0	0	0	0	0	0	0	0	0	0	0	0	0	0	0	0	0	0	0	NA	NA	NA	NA	NA	NA	NA	NA	NA	NA	NA	NA	NA	NA	NA	NA	NA	NA	NA	NA	NA	NA	NA
ENSMUSG00000001627	Ifrd1	5.00124	5.97228	4.55996	6.08481	5.47781	4.84443	5.47613	5.6135	5.63378	4.82872	4.81383	4.83651	5.04905	4.871	4.93211	4.96404	5.04547	4.71497	4.86812	5.41661	5.20814	5.31933	4.79407	4.76592	4.8718	5.34927	4.8998	4.92238	4.87619	5.3147	4.8106	56.5725	-0.0515189	0.846086	0.932854	47.2408	0.224094	0.46463	0.602718	82.9063	-0.373207	0.113605	0.166229	54.4644	0.444998	0.102335	0.142335	33.1366
ENSMUSG00000001630	Stk38l	3.99591	3.94779	2.32615	5.63164	4.12324	3.37604	3.80743	4.29013	4.4697	4.04106	3.81414	3.53276	3.77503	3.63744	3.35428	3.87309	4.42498	3.93658	3.5981	4.32617	3.83923	4.14568	4.07365	4.0908	4.14995	4.00091	3.70731	3.6216	3.98655	4.10369	4.1048	23.2481	0.148842	0.719424	0.864263	24.7214	-0.286926	0.507934	0.641437	36.0739	-0.389745	0.26035	0.338806	30.2446	-0.297924	0.394147	0.461224	16.6189
ENSMUSG00000001632	Brpf1	5.30026	5.67044	6.2819	6.08717	5.90119	5.38739	5.7222	5.37941	5.93673	5.57652	5.34823	5.50113	5.43899	5.4327	5.30107	4.86	4.78107	5.13602	5.05474	4.27429	4.64544	4.49438	5.89319	6.04908	5.95958	5.72432	5.42945	5.19792	4.99061	4.47137	5.96728	78.9552	0.250904	0.297448	0.53863	61.8591	0.743568	0.00659541	0.0188807	74.2077	1.68075	2.0836e-10	8.52015e-10	115.412	-0.436473	0.0252934	0.0399525	37.7736
ENSMUSG00000001642	Akr1b3	2.38043	3.00798	3.47178	2.62057	3.99548	1.61457	3.59225	3.10956	2.7693	2.88907	2.69075	2.75016	2.67336	2.65543	2.16159	2.49014	2.33601	3.17882	2.54966	2.21447	2.47911	2.8589	4.04896	4.21257	4.07828	2.9451	2.70476	2.43572	2.68816	2.51749	4.11327	10.1771	0.500333	0.414712	0.652306	10.2804	-0.0143648	0.981699	0.989169	12.9824	0.523323	0.335952	0.420722	31.4418	-1.88724	1.5134e-07	4.13828e-07	6.10285
ENSMUSG00000001655	Hoxc13	0	0	0	0	0	0	0	0	0	0	0	0	0	0	0	0	0	0	0	0	0	0	0	0	0	NA	NA	NA	NA	NA	NA	NA	NA	NA	NA	NA	NA	NA	NA	NA	NA	NA	NA	NA	NA	NA	NA	NA
ENSMUSG00000001656	Hoxc11	0	0	0	0	0	0	0	0	0	0	0	0	0	0	0	0	0	0	0	0	0	0	0	0	0	NA	NA	NA	NA	NA	NA	NA	NA	NA	NA	NA	NA	NA	NA	NA	NA	NA	NA	NA	NA	NA	NA	NA
ENSMUSG00000001657	Hoxc8	0	0	0	0	0	0	0	0	0	0	0	0	0	0	0	0	0	0	0	0	0	0	0	0	0	NA	NA	NA	NA	NA	NA	NA	NA	NA	NA	NA	NA	NA	NA	NA	NA	NA	NA	NA	NA	NA	NA	NA
ENSMUSG00000001661	Hoxc6	0	0	0	0	0	0	0	0	0	0	0	0	0	0	0	0	0	0	0	0	0	0	0	0	0	NA	NA	NA	NA	NA	NA	NA	NA	NA	NA	NA	NA	NA	NA	NA	NA	NA	NA	NA	NA	NA	NA	NA
ENSMUSG00000001663	Gstt1	3.61171	4.40939	4.65802	3.99744	3.97916	2.46636	3.83773	3.18905	2.81633	3.97186	3.69296	3.44685	3.2092	2.63478	1.70137	2.87511	3.6767	2.964	3.0353	5.48698	5.75851	5.96227	2.51714	2.13235	1.9503	3.69371	3.44967	2.40376	3.22533	5.73592	2.19993	14.4188	1.78937	0.00334683	0.0196127	16.9779	0.5817	0.266564	0.401563	118.68	-2.85704	3.45555e-27	3.16979e-26	14.4108	2.55754	6.10239e-05	0.000135038	7.21008
ENSMUSG00000001665	Gstt3	0.0561451	-0.0154704	0.357361	2.4544	1.15564	0.19462	1.50782	2.16953	0.631391	1.03141	-0.374549	-0.0905673	0.181487	-0.203641	-0.290686	-0.0837658	0.0375998	-0.24998	-0.120622	2.69064	3.24122	2.87089	0.942137	1.43069	0.943712	0.954284	-0.094543	-0.192698	-0.111001	2.93425	1.10551	0.257727	0.914137	0.798459	NA	0.232441	0.6399	0.873833	NA	22.0185	-6.22295	7.40397e-09	2.72218e-08	2.79163	-3.28948	0.0195068	0.0314075	0
ENSMUSG00000001666	Ddt	3.76806	2.28616	2.26496	4.97835	3.76191	2.67855	3.34577	2.70114	3.31205	3.63381	3.87873	3.70284	3.73601	3.63253	3.3892	3.04667	4.68667	4.92909	4.9985	5.8167	6.05892	6.16282	4.19502	4.13624	3.86792	3.27308	3.77253	3.35613	4.87142	6.01281	4.06639	21.2796	0.575545	0.182197	0.397106	42.8125	-1.4412	3.30942e-06	1.8604e-05	136.025	-2.82825	8.72203e-34	1.01002e-32	30.538	-0.132948	0.704199	0.752229	26.9703
ENSMUSG00000001670	Tat	0	0	0	0	0	0	0	0	0	0	0	0	0	0	0	0	0	0	0	0	0	0	0	0	0	NA	NA	NA	NA	NA	NA	NA	NA	NA	NA	NA	NA	NA	NA	NA	NA	NA	NA	NA	NA	NA	NA	NA
ENSMUSG00000001672	Marveld3	-1.87913	-1.72243	-1.8163	-1.79081	-1.8302	-1.84689	-1.94322	-1.89113	-1.91138	-1.91452	-1.99907	-1.90161	-1.99206	-1.96575	-1.99585	-1.92402	-1.70559	-1.80408	-1.75701	-1.99311	-1.98584	-1.99653	-1.96356	-1.96887	-1.96335	-1.8546	-1.96425	-1.96187	-1.75556	-1.99183	-1.96526	0.0868986	-0.0958564	0.981258	NA	0.948306	-2.86235	0.178522	NA	0.112985	0.67431	0.868747	NA	0.098018	0.26208	0.948789	NA	0.60948
ENSMUSG00000001674	Ddx18	3.35091	2.99607	3.20222	1.83165	2.76037	2.21567	1.92312	3.09706	2.58729	2.11323	2.8771	2.83964	2.92177	2.82708	3.00308	2.91805	1.97166	2.74259	3.19153	2.79092	2.64358	3.2414	4.34196	3.54206	4.23393	2.60776	2.8795	2.91607	2.63526	2.89196	4.03932	15.1056	-0.0929995	0.849091	0.934893	11.6184	0.318521	0.598216	0.720909	18.0337	0.157194	0.735421	0.793547	32.9471	-1.57114	7.41578e-05	0.00016268	8.25857
ENSMUSG00000001687	Ubl3	6.28669	7.19163	6.82523	7.56505	6.88873	7.39114	7.18817	6.79606	7.00529	6.959	7.44011	7.55524	7.36319	7.67108	7.49979	7.2536	8.55137	8.57474	8.7926	8.34717	8.36077	8.33147	8.55833	8.65577	8.67944	7.0097	7.45284	7.47482	8.63957	8.34647	8.63118	338.79	-0.0666996	0.654306	0.823923	556.573	-1.43657	3.18683e-21	6.98961e-20	636.682	-0.953277	3.83053e-13	1.87653e-12	639.628	-1.26247	1.86341e-23	1.0582e-22	390.679
ENSMUSG00000001700	Gramd3	2.83792	4.06187	2.327	3.4714	2.71112	3.88443	3.29904	1.72552	3.66129	3.7771	0.951331	1.05602	2.06662	0.663755	0.489185	1.47187	1.11137	0.572171	2.62167	6.4982	6.46694	6.53781	3.1467	2.75871	2.01212	3.17567	1.35799	0.874935	1.43507	6.50098	2.63918	1.85819	2.46023	0.149649	0.3501	2.89589	-0.283424	0.852617	0.903123	217.218	-7.07482	9.69932e-53	1.97224e-51	7.57978	-1.95134	0.0195801	0.031519	1.30689
ENSMUSG00000001707	Eef1e1	4.36814	4.49323	5.62842	5.2824	4.60716	4.69094	4.27587	4.80688	4.3973	4.29178	5.40126	5.17175	5.31572	5.25912	5.65054	5.38188	6.39723	6.28615	6.55661	5.70383	5.58905	5.52265	5.89278	5.6577	5.74657	4.68421	5.29624	5.43052	6.41333	5.60518	5.76568	85.3694	-0.238612	0.30181	0.543002	128.022	-1.36907	8.63957e-11	8.78795e-10	110.009	-0.187005	0.378375	0.463543	101.406	-0.347332	0.106107	0.147023	92.8527
ENSMUSG00000001729	Akt1	7.04618	7.07702	6.96996	7.21178	6.96543	6.94943	7.0826	6.96876	6.732	7.11888	6.22284	6.08983	5.91837	6.40162	6.08808	5.41409	6.79085	6.48247	6.12972	6.15581	6.36961	6.46749	7.40194	7.6351	7.69411	7.0122	6.07701	5.96793	6.46768	6.33097	7.57705	111.351	0.0276372	0.913722	0.96795	120.758	-0.408662	0.119886	0.216638	154.211	-0.111501	0.584682	0.661724	280.615	-1.74308	3.8466e-23	2.15183e-22	82.3171
ENSMUSG00000001739	Cldn15	-2.37506	-2.37646	-2.37118	-2.3696	-2.37204	-2.37307	-2.37902	-2.3758	-2.37705	-2.37724	-2.38366	-2.37617	-2.38203	-2.38041	-2.38252	-2.37783	-2.37542	-2.3815	-2.37859	-2.3821	-2.38165	-2.38287	-2.38027	-2.3806	-2.38026	-2.37465	-2.38062	-2.38025	-2.3785	-2.3822	-2.38038	0.0868986	-0.0958564	0.981258	NA	0.0784542	-0.379878	0.925828	NA	0.112985	0.67431	0.868747	NA	0.098018	0.26208	0.948789	NA	0
ENSMUSG00000001741	Il16	2.19389	3.09213	5.65206	5.20298	5.35761	5.02018	5.49053	4.93205	5.4588	5.25826	1.67979	1.78926	2.16168	3.64654	3.72825	3.74613	6.8184	6.10431	6.50314	2.76933	2.40001	2.77019	8.12368	7.80814	7.92708	4.76585	1.87691	3.70697	6.47529	2.64651	7.95297	10.288	-4.10405	8.20755e-07	1.19303e-05	112.964	-7.7875	1.46603e-28	4.88804e-27	3.65674	-1.9386	0.0692377	0.107382	435.473	-9.44187	5.86608e-46	6.25226e-45	84.6407
ENSMUSG00000001750	Tcirg1	3.56896	3.64253	1.6187	1.76013	2.78334	4.45869	3.34941	3.66427	2.58096	3.18236	1.82957	1.32473	0.663825	1.60362	1.04137	1.01393	2.28597	1.4651	1.84307	3.67562	3.94733	4.15832	6.02639	6.4064	6.54711	3.06094	1.27271	1.21964	1.86471	3.92709	6.32663	1.68019	0.737996	0.642581	0.817401	2.69753	-0.675262	0.597046	0.719808	23.6303	-3.85379	6.8914e-11	2.91736e-10	155.584	-6.82694	1.57152e-44	1.61278e-43	1.60149
ENSMUSG00000001751	Naglu	4.59062	3.93515	2.34173	5.55423	4.21472	4.18389	3.94	4.05029	1.78995	3.34389	3.45123	3.23525	3.42306	2.72039	3.01796	3.10327	3.07934	3.56834	4.18441	4.71917	5.27813	5.27064	7.07447	7.3052	7.34051	3.79445	3.36985	2.94721	3.6107	5.08931	7.24006	12.5869	0.725208	0.193235	0.411985	15.9641	-0.380279	0.472799	0.610213	58.6558	-2.25734	3.02331e-12	1.39448e-11	270.053	-4.89732	8.18485e-99	2.71444e-97	9.12643
ENSMUSG00000001755	Coasy	5.90418	5.35698	4.80244	5.42366	4.36648	4.48902	5.36278	5.41239	4.83174	5.44114	4.4257	4.72565	4.69675	4.8915	4.63289	4.60224	4.65818	4.65239	4.42434	5.44236	5.57942	5.74318	5.33092	5.39491	5.59738	5.13908	4.61603	4.70888	4.57831	5.58832	5.44107	45.2892	-0.158647	0.597443	0.786778	35.9575	0.225965	0.512193	0.644897	89.9154	-1.15308	1.96035e-06	5.89369e-06	68.8948	-0.882775	0.000565612	0.00113374	26.2778
ENSMUSG00000001761	Smo	1.38253	3.31831	4.10501	4.6647	3.14059	2.66177	3.18716	2.5749	3.83471	3.18663	1.00616	0.673315	1.25094	0.980815	1.20651	1.16532	3.90095	3.69939	3.74145	4.74377	5.0809	4.89833	3.64224	3.5375	3.77347	3.20563	0.976806	1.11755	3.7806	4.90767	3.65107	0.431087	0.0278108	0.992095	NA	14.8289	-6.15162	2.52754e-08	1.93031e-07	57.0995	-7.61361	1.73461e-13	8.69062e-13	14.6483	-5.82197	1.05162e-07	2.9089e-07	10.2991
ENSMUSG00000001763	Tspan33	3.77915	3.80286	3.81155	3.31194	4.26864	4.23838	3.6705	3.66362	3.9886	3.87157	4.71727	4.79478	4.7068	4.25841	4.46707	4.07924	3.19999	4.07111	4.18465	5.54993	5.69472	5.57753	4.83295	5.12353	4.878	3.84068	4.73962	4.26824	3.81858	5.60739	4.94483	49.4786	0.619678	0.0322475	0.11805	37.5017	1.32248	0.000432494	0.00165736	115.457	-0.939707	3.47938e-06	1.02252e-05	68.1879	0.0131119	0.957473	0.966058	18.923
ENSMUSG00000001767	Crnkl1	7.44695	6.86481	6.23279	5.38124	6.86841	5.98665	6.71575	6.78107	6.5156	6.47911	6.22121	6.11888	6.19491	6.3517	6.52562	6.53352	5.73375	5.56927	5.57027	5.87641	5.80943	5.92582	7.09106	6.88892	6.76684	6.52724	6.17833	6.47028	5.62443	5.87055	6.91561	162.516	-0.425659	0.0112119	0.0527276	94.7501	0.98919	1.24495e-05	6.3942e-05	146.461	0.686058	0.000207328	0.000499005	206.967	-0.713556	4.51614e-05	0.0001013	79.9205
ENSMUSG00000001768	Rin2	6.3033	5.09788	4.49372	5.69451	6.00878	5.61474	5.14352	5.30682	5.41165	5.43774	4.23045	4.30672	3.97533	4.6484	4.44792	4.4813	4.01278	3.77679	3.6822	6.73097	6.93166	7.25278	8.91699	8.84541	9.15981	5.45127	4.17083	4.52587	3.82392	6.9718	8.97407	27.7158	-0.536255	0.148002	0.34762	15.8039	0.887914	0.0848626	0.163921	205.607	-3.67676	1.2408e-49	2.35579e-48	885.343	-6.06151	4.90301e-199	8.21671e-197	14.153
ENSMUSG00000001773	Folh1	5.16611	4.65367	5.32933	5.55192	5.30948	4.96955	4.71732	5.89523	4.69543	4.83392	2.58356	2.53472	2.2631	2.93698	3.09609	3.86775	2.05027	2.89195	3.65029	8.05189	8.00518	8.08935	3.07718	3.85363	3.07913	5.11219	2.46046	3.30027	2.86417	8.04881	3.33665	9.49593	-1.53439	0.0213637	0.086947	5.72951	-0.87747	0.338074	0.479687	580.666	-7.51905	2.32484e-111	1.60169e-109	9.24169	-1.32305	0.0491573	0.0735958	6.99109
ENSMUSG00000001774	Chordc1	5.97324	6.10559	6.14984	6.15083	6.61615	6.3235	6.04889	5.94511	6.38306	6.10291	6.90383	7.09013	7.2387	7.38936	7.3066	7.61695	7.15996	7.91205	8.23311	6.73834	6.42306	6.3287	7.32822	7.03207	6.97437	6.17991	7.07755	7.43764	7.76837	6.4967	7.11155	354.474	-0.489783	0.00102815	0.0072829	373.012	-0.865735	0.00310982	0.00974169	284.769	1.03931	2.17762e-07	7.13406e-07	304.94	0.2559	0.162959	0.214013	295.566
ENSMUSG00000001783	Rtcb	8.85509	8.06032	8.12056	8.00551	8.36152	8.05758	8.66352	8.71467	8.43017	8.71213	7.55688	7.57739	7.61882	7.61985	7.76513	7.79529	7.65411	7.4122	7.15881	7.29271	7.23276	7.25749	8.12847	8.14672	8.24293	8.39811	7.58436	7.72676	7.40838	7.26099	8.1727	377.466	-0.216057	0.083309	0.238074	278.585	0.402718	0.0332546	0.0761989	366.394	0.710642	2.58117e-07	8.40218e-07	476.686	-0.502728	3.1414e-05	7.15226e-05	209.833
ENSMUSG00000001785	Pwp1	6.48839	5.40222	6.41939	6.0875	5.27552	5.4561	6.38688	6.23662	5.62653	6.05219	5.33533	5.34062	5.28267	5.28883	5.64804	5.4052	4.98704	4.79742	4.99435	5.28545	5.36559	5.51645	6.20813	6.01686	6.01099	5.94314	5.31954	5.44736	4.92627	5.38916	6.07866	78.4287	-0.228514	0.326962	0.569981	52.3296	0.780258	0.00663655	0.0189807	90.2328	0.142626	0.519383	0.600899	110.848	-0.75934	0.000157063	0.00033467	39.6158
ENSMUSG00000001786	Fbxo7	5.22294	5.54932	4.81664	6.27762	4.67902	5.81787	5.11945	5.04186	5.13877	4.93914	5.43483	5.44975	5.39729	5.38623	5.20421	5.1115	5.54272	5.72316	5.81953	5.80025	5.76524	6.06285	6.03508	5.85998	5.84589	5.26026	5.42729	5.23398	5.69514	5.87611	5.91365	77.8335	0.250655	0.276134	0.515208	83.2094	-0.2453	0.280055	0.416654	127.705	-0.392744	0.0522941	0.0837361	110.105	-0.371237	0.0622337	0.0911207	53.2331
ENSMUSG00000001794	Capns1	5.60021	6.74757	8.11479	6.8071	6.96351	7.3584	6.83859	7.19071	6.97638	7.05466	7.32394	7.22972	7.16237	7.60942	7.28091	7.18738	8.42793	8.2733	8.00154	8.33447	8.40592	8.63808	8.92279	8.86464	9.08468	6.96519	7.23868	7.35924	8.23425	8.45949	8.95737	293.735	-0.205099	0.18978	0.407295	410.206	-1.20614	8.19226e-12	9.20695e-11	651.88	-1.4096	4.59037e-21	3.28879e-20	766.98	-1.98242	3.93948e-51	4.78848e-50	297.534
ENSMUSG00000001802	Lrp3	5.30401	6.02817	5.26436	5.22925	6.60008	5.80191	5.92639	5.56896	5.7165	5.87675	5.36784	5.05258	5.11318	5.36476	5.09648	5.10124	4.93909	5.33919	5.05576	4.36023	4.52117	4.67719	3.32854	3.96494	3.69128	5.73164	5.17786	5.18749	5.11135	4.51953	3.66159	74.7373	-0.0256437	0.916302	0.968552	61.6466	0.209765	0.469767	0.607361	68.9533	1.21949	7.89549e-06	2.23582e-05	48.3566	2.68948	1.05242e-12	3.86182e-12	42.9505
ENSMUSG00000001804	Dsg4	0	0	0	0	0	0	0	0	0	0	0	0	0	0	0	0	0	0	0	0	0	0	0	0	0	NA	NA	NA	NA	NA	NA	NA	NA	NA	NA	NA	NA	NA	NA	NA	NA	NA	NA	NA	NA	NA	NA	NA
ENSMUSG00000001815	Evx2	-2.20653	-2.21405	-2.18568	-2.17723	-2.19029	-2.19583	-2.16828	-2.21051	-2.21723	-2.21827	-2.25116	-2.25133	-2.24399	-2.23527	-2.24663	-2.22142	-2.20846	-2.18161	-2.22552	-2.24434	-2.24193	-2.24848	-2.23454	-2.2363	-2.23447	-2.19839	-2.24883	-2.23444	-2.2052	-2.24492	-2.2351	0	NA	NA	NA	0.152475	-2.24404	0.581531	NA	0	NA	NA	NA	0	NA	NA	NA	0.106445
ENSMUSG00000001819	Hoxd13	0	0	0	0	0	0	0	0	0	0	0	0	0	0	0	0	0	0	0	0	0	0	0	0	0	NA	NA	NA	NA	NA	NA	NA	NA	NA	NA	NA	NA	NA	NA	NA	NA	NA	NA	NA	NA	NA	NA	NA
ENSMUSG00000001823	Hoxd12	0	0	0	0	0	0	0	0	0	0	0	0	0	0	0	0	0	0	0	0	0	0	0	0	0	NA	NA	NA	NA	NA	NA	NA	NA	NA	NA	NA	NA	NA	NA	NA	NA	NA	NA	NA	NA	NA	NA	NA
ENSMUSG00000001827	Folr1	0.592968	0.512424	3.60599	3.73703	0.773917	2.99318	2.29878	2.17829	1.47384	1.9665	0.425245	0.573971	1.13729	0.310871	0.223952	0.437422	0.571937	0.968694	1.95516	2.69247	2.85707	2.46902	1.54694	1.66991	1.99085	2.01329	0.712168	0.324082	1.16526	2.67285	1.7359	0.787785	2.53313	0.251786	NA	2.30966	-1.3275	0.342361	0.483863	12.6547	-3.69701	1.29012e-06	3.95292e-06	4.25879	-2.07082	0.0387329	0.0590725	1.11116
ENSMUSG00000001829	Clpb	7.55902	7.28379	7.27011	5.92845	7.20647	6.27438	7.19863	7.39615	6.90149	7.07221	6.4939	6.47175	6.54927	6.62774	6.305	6.51415	6.60081	5.99844	5.95288	6.50795	6.51785	6.72746	5.95512	5.94996	6.14287	7.00907	6.50497	6.4823	6.18404	6.58442	6.01598	175.936	0.0169557	0.920383	0.970047	133.875	0.609566	0.0165098	0.0419834	219.864	0.126391	0.448248	0.53361	149.224	1.0086	3.9274e-08	1.11615e-07	92.0766
ENSMUSG00000001833	2007-09-01	10.9136	10.6076	10.3979	10.14	10.49	9.77665	10.9547	11.1858	10.5973	10.6479	10.448	10.4991	10.7309	10.1259	10.3312	10.4497	9.73123	10.0188	10.1648	10.773	10.5636	10.6683	10.0436	9.92166	10.0437	10.5711	10.5593	10.3023	9.97162	10.6683	10.003	2828.25	0.334656	0.00564341	0.030326	2158.57	0.952372	1.13262e-07	7.90187e-07	3966.79	0.104333	0.460865	0.545409	2623.09	1.08299	4.23248e-17	1.88505e-16	1284.82
ENSMUSG00000001844	Zdhhc4	3.16663	3.4629	3.77987	3.55899	1.80601	3.78772	2.85152	3.05498	1.92772	2.22831	3.17664	3.00574	2.61476	2.84885	2.83419	2.90202	2.93164	3.11131	3.45008	3.8728	4.3044	3.9032	3.36489	3.72708	3.11201	2.96246	2.93238	2.86169	3.16434	4.0268	3.40133	13.4685	0.191818	0.719328	0.864225	13.9066	-0.219408	0.686349	0.789501	34.4956	-1.40382	0.000195639	0.000472405	19.1132	-0.436158	0.354215	0.420589	9.15303
ENSMUSG00000001847	Rac1	8.72931	8.23023	8.35856	7.68988	8.44789	8.3533	8.94726	8.63807	8.55867	8.73313	8.67299	8.79244	8.57218	8.74164	8.69323	8.50448	8.35147	8.30523	8.03024	9.24151	9.23667	9.4266	10.0646	10.2052	10.1794	8.46863	8.6792	8.64645	8.22898	9.3016	10.1497	792.355	0.0263186	0.824051	0.921557	571.77	0.790107	2.38264e-06	1.3679e-05	1307.72	-0.589539	1.19624e-05	3.32463e-05	1849.19	-1.62243	3.8937e-42	3.76304e-41	388.75
ENSMUSG00000001855	Nup214	6.60684	6.58382	6.94285	6.98457	6.69246	6.92247	6.81775	6.75239	6.50373	6.65591	6.53448	6.28741	6.09619	6.09942	6.19657	6.13646	6.73189	6.32328	6.49794	6.22185	6.18233	6.16976	7.23816	7.27299	7.48791	6.74628	6.30603	6.14415	6.5177	6.19131	7.33302	136.661	0.244737	0.218856	0.447067	140.461	-0.10547	0.665253	0.773154	167.881	0.441709	0.0311736	0.0524744	260.848	-1.07166	1.98721e-08	5.76192e-08	90.1615
ENSMUSG00000001864	Aif1l	2.54192	2.31344	0.637581	0.781161	1.44268	1.32701	1.75472	0.319595	2.21869	1.58953	0.814635	0.373147	-0.0154048	0.0636212	-0.0377771	0.202234	0.342089	0.79364	0.743683	3.67802	3.70991	3.51321	0.929119	1.67436	0.58549	1.49263	0.390792	0.0760259	0.626471	3.63371	1.06299	0.57981	2.17609	0.400821	NA	1.08863	-0.224407	0.904064	NA	33.5217	-5.25907	4.63664e-15	2.52525e-14	2.51627	-1.40803	0.279337	0.341832	0.392544
ENSMUSG00000001865	Cpa3	-1.12213	-1.21572	-0.862763	-0.757555	-0.92013	-0.98905	-1.29211	-1.17166	-0.582653	-1.24392	-1.3985	-1.41008	-1.35355	-1.32357	-1.36197	-1.25973	-1.14621	-1.34405	-1.28053	-1.35468	-1.34675	-1.36768	0.682959	0.775865	0.605417	-1.01577	-1.38738	-1.31509	-1.25693	-1.35637	0.68808	0	NA	NA	NA	0	NA	NA	NA	0	NA	NA	NA	13.006	-7.50757	3.69641e-09	1.11829e-08	0
ENSMUSG00000001870	Ltbp1	3.52075	4.81227	5.84526	2.73582	1.67274	4.01788	4.06888	3.93944	4.19352	3.58376	2.71151	2.39785	2.56433	0.895316	0.720423	1.12455	1.34984	1.99136	1.05508	6.70901	6.87819	6.79382	2.49766	2.44548	2.17375	3.83903	2.5579	0.913429	1.46543	6.79367	2.37229	4.66799	5.14642	0.000228429	0.00195992	4.82862	2.33096	0.037644	0.0844642	258.433	-5.3829	2.54161e-87	1.169e-85	8.64486	0.647734	0.316398	0.381465	0.42578
ENSMUSG00000001891	Ugp2	7.26273	7.25514	7.17733	6.40253	6.80877	7.33252	7.13828	7.34672	7.32254	7.02723	7.02799	7.08094	7.17636	7.08798	7.1365	7.42144	7.05912	7.6342	7.87148	9.72606	9.43814	9.41273	7.80283	7.55962	7.64644	7.10738	7.0951	7.21531	7.5216	9.52564	7.66963	261.152	-0.180726	0.235508	0.46836	265.761	-0.51961	0.0367505	0.0827903	1399.4	-2.97041	4.30257e-84	1.84875e-82	331.067	-0.494364	0.00095128	0.00185694	194.751
ENSMUSG00000001901	Kcnh6	0.250068	1.19299	0.495542	0.622468	3.17605	0.343184	0.585655	0.21884	1.96337	0.733781	1.77231	1.64128	1.38748	1.0062	0.332391	0.137735	0.234795	1.34329	0.109305	1.37891	1.04682	1.93647	0.488541	0.985013	1.02266	0.958195	1.60036	0.49211	0.562463	1.45406	0.832071	5.62917	2.41726	0.0161737	0.0706497	5.23141	1.85622	0.0829726	0.161091	10.9061	0.404548	0.510535	0.592551	6.86752	1.89489	0.020457	0.0327766	1.16352
ENSMUSG00000001909	Trmt1	5.44105	5.29621	4.70889	5.73252	5.87591	5.4311	5.10518	5.60966	5.37862	5.04689	5.17948	5.24997	5.17108	5.22339	5.08274	4.98008	4.89718	5.56997	4.73453	4.64011	4.56863	4.65714	5.35284	5.34151	5.15474	5.3626	5.20018	5.0954	5.06723	4.62196	5.28303	70.9027	0.124685	0.601016	0.789223	61.3762	0.212724	0.534977	0.664849	70.7627	1.10722	8.32922e-06	2.35416e-05	78.7134	0.19102	0.403392	0.47047	40.354
ENSMUSG00000001910	Nacc1	7.24131	6.32198	5.60531	6.38771	7.25545	6.65068	6.76031	7.352	6.48905	7.04388	6.36251	6.21637	6.37173	6.1311	6.13624	6.10754	6.49607	6.13758	6.20353	6.379	6.36179	6.45437	6.00519	6.41318	6.2213	6.71077	6.31687	6.12496	6.27906	6.39839	6.21323	141.52	0.254573	0.152878	0.355583	130.501	0.231163	0.27504	0.411329	192.139	0.130073	0.443808	0.529675	151.357	0.439636	0.0270244	0.0424611	82.231
ENSMUSG00000001911	Nfix	8.53351	8.21189	8.38771	8.41737	8.54525	8.48939	8.45513	8.29978	8.23013	8.20267	8.49414	8.30775	8.47408	8.66591	8.58488	8.61023	8.22372	7.46787	7.96437	9.01887	9.10139	9.2318	7.40222	7.65802	7.52397	8.37728	8.42532	8.62034	7.88532	9.11735	7.52807	779.098	-0.277158	0.00972358	0.0470623	494.893	0.871815	0.000338114	0.00132425	1193.38	-0.677412	2.76801e-07	8.99065e-07	532.043	1.5765	1.19086e-26	7.51585e-26	386.609
ENSMUSG00000001918	Slc1a5	0.701651	0.551634	-0.104404	-0.00545602	-0.158358	-0.223178	-0.477879	-0.394919	0.490733	-0.440157	-0.336159	-0.574766	-0.530043	-0.50387	-0.537078	-0.453194	-0.370984	-0.521936	-0.469362	0.845455	1.07439	0.31099	0.866222	1.13516	1.269	-0.0060333	-0.480323	-0.498047	-0.454094	0.743611	1.09013	0.101503	-0.0958564	0.981258	NA	0.0920011	-0.379878	0.925828	NA	4.29398	-4.68268	0.00128438	0.0027784	5.36753	-5.23705	0.00015833	0.000337277	0
ENSMUSG00000001924	Uba1	10.0779	9.84426	10.0278	9.56234	10.0634	9.54119	9.94473	10.1362	9.82915	10.0303	10.1982	10.1658	10.1027	10.066	10.1674	10.063	10.0174	9.92352	9.6999	9.70551	9.62039	9.88138	9.81259	9.82719	9.75806	9.90573	10.1556	10.0988	9.88027	9.73576	9.79928	2370.45	0.0610014	0.483543	0.707997	1855.18	0.526832	0.000162744	0.000687258	2473.24	0.817872	1.29751e-10	5.38527e-10	2156.41	0.79935	8.96935e-16	3.75982e-15	1247.87
ENSMUSG00000001930	Vwf	4.33297	4.39316	5.47763	5.16918	3.94838	4.77731	3.95644	3.911	4.53132	4.41639	2.22596	1.54186	1.19298	1.66567	1.14667	1.10656	1.30195	2.11301	1.54619	2.74161	2.09178	2.46068	2.1227	3.06386	3.12178	4.49138	1.6536	1.3063	1.65372	2.43136	2.76945	2.34393	1.40811	0.312068	0.554171	2.57941	0.408079	0.758176	0.83979	7.10827	-1.05613	0.179666	0.24823	8.22239	-1.62398	0.0388363	0.0592187	1.09441
ENSMUSG00000001942	Siae	6.29979	5.80137	5.40668	6.01692	5.16462	5.39788	5.34253	5.99907	5.52726	5.46261	5.5335	5.4358	5.59481	5.17224	5.11485	5.2317	5.96668	5.38672	5.57926	6.81442	6.70798	6.91836	6.77489	6.9954	6.88909	5.64187	5.52137	5.17293	5.64422	6.81358	6.88646	70.9275	0.513561	0.0335865	0.121426	76.7146	-0.00267052	0.992183	0.996085	211.299	-1.54242	1.06916e-18	6.93297e-18	186.5	-1.57482	1.29506e-19	6.40939e-19	45.4315
ENSMUSG00000001943	Vsig2	-1.10154	-1.14251	-0.988015	-0.941965	-1.01313	-1.04329	-1.21733	-1.12322	-1.15981	-1.16548	-0.730663	-0.860875	-0.416092	-0.617172	-0.892952	-0.858969	-1.11208	-1.23114	-1.20499	-1.03257	-1.2316	-1.23491	-1.22707	-1.22823	-1.22702	-1.08963	-0.66921	-0.789697	-1.18274	-1.16636	-1.22744	3.26208	0.393738	0.716535	0.862416	1.69775	3.52296	0.0480636	0.103081	2.63968	3.60017	0.0219656	0.0381831	2.12328	4.15711	0.0125884	0.0209536	0.851719
ENSMUSG00000001946	Esam	3.04372	2.48835	3.4995	4.11317	3.14953	2.98999	3.18269	2.58285	2.86819	3.61472	2.71315	2.8526	2.56526	1.77711	1.84259	2.29695	2.82603	1.44668	1.75194	1.89511	0.824521	1.92074	1.97546	1.93432	1.97706	3.15327	2.71034	1.97222	2.00821	1.54679	1.96228	10.3205	1.41188	0.0307888	0.114049	9.76039	1.39978	0.0721295	0.14429	11.4819	2.30206	0.000855205	0.00189973	10.8431	1.73284	0.0061035	0.0106927	4.02142
ENSMUSG00000001948	Spa17	0.907218	2.04352	1.13879	1.23964	2.66198	2.97073	0.70072	0.865441	1.33549	0.787767	2.25934	2.08134	2.11804	2.15017	1.74842	2.07436	2.91034	2.36126	3.1698	3.40662	3.2864	3.41572	1.56843	1.71336	1.34278	1.46513	2.15291	1.99098	2.8138	3.36958	1.54153	8.894	0.296702	0.646937	0.820114	13.4034	-0.995199	0.0780564	0.15322	26.7466	-1.69408	1.65485e-05	4.5283e-05	7.36092	1.53689	0.0397545	0.0605484	8.80852
ENSMUSG00000001962	Fam50a	4.61367	4.8355	5.09216	4.6184	3.41115	3.87214	4.40013	4.31303	4.67904	4.75074	5.56249	5.28696	5.39065	5.41991	5.50573	5.8063	5.21745	5.27834	5.19045	5.47049	5.4501	5.4801	6.98907	6.65465	6.93232	4.4586	5.41337	5.57731	5.22875	5.46689	6.85868	99.5604	-0.228141	0.29446	0.535172	71.6528	0.417931	0.102372	0.190938	111.478	0.18035	0.39114	0.476759	209.191	-1.61739	2.2812e-17	1.0282e-16	54.8027
ENSMUSG00000001964	Emd	4.5081	5.22229	5.66733	3.2576	3.0337	5.56177	4.12456	4.2902	4.19227	4.66053	6.0398	5.96767	5.89036	6.02559	6.16458	6.02894	5.5958	5.8994	5.98394	6.02188	5.91401	5.97556	6.39152	6.58886	6.51018	4.45183	5.96594	6.07304	5.82638	5.97048	6.49686	153.355	-0.165417	0.335227	0.577989	117.41	0.307205	0.148912	0.257297	174.181	0.245959	0.158103	0.22264	189.847	-0.394458	0.0174237	0.0283303	86.2442
ENSMUSG00000001983	Taco1	5.06787	4.51227	5.02338	5.02426	4.98685	5.08074	5.97828	6.20578	5.74974	5.59981	5.38288	5.33612	5.3648	5.32379	5.17194	5.44318	5.00515	5.31482	5.08963	5.45985	5.35706	5.73498	5.31312	5.19902	5.5709	5.3229	5.36127	5.31297	5.13653	5.5173	5.36102	81.6777	0.070157	0.755123	0.882615	64.5089	0.434442	0.0965894	0.18229	107.739	0.00559916	0.97957	0.985404	85.1272	0.298452	0.194943	0.250017	43.6659
ENSMUSG00000001985	Grik3	7.13228	6.9836	5.59524	5.87625	6.87737	6.62952	6.47285	6.27589	6.68402	6.7306	6.4315	6.21967	6.2941	5.01318	5.05893	5.17443	6.74404	6.42771	6.19804	5.16636	5.54301	4.77049	4.35446	4.74588	4.35637	6.52576	6.31509	5.08218	6.4566	5.15995	4.48557	115.158	1.77214	4.34203e-16	1.8016e-14	164.09	-0.0351592	0.872626	0.916758	148.428	1.84374	1.13703e-12	5.39852e-12	112.852	3.02082	3.33451e-29	2.28882e-28	74.8772
ENSMUSG00000001986	Gria3	9.81681	9.32066	9.40267	9.11028	9.18254	8.85263	8.98981	9.28562	9.12443	9.25825	9.66916	9.60733	9.63421	10.0256	9.85324	10.0183	9.7133	9.89996	10.1227	8.21604	8.2495	7.41156	7.13219	7.661	7.4191	9.23437	9.6369	9.9657	9.91199	7.95903	7.4041	2151.06	-0.445501	9.1715e-07	1.32242e-05	1778.94	-0.22173	0.142954	0.249366	1395.14	2.50546	5.63558e-23	4.35278e-22	1119.11	3.5077	2.24284e-87	6.12329e-86	1434.07
ENSMUSG00000001988	Npas1	2.94041	2.71065	2.8899	0.716432	1.88949	2.37165	2.46309	2.32837	2.51211	2.48041	0.772274	0.677982	0.000903736	0.0630431	0.367071	0.177854	0.29921	0.983109	0.141945	0.399205	0.0148143	0.341776	0.547152	1.08926	0.0691304	2.33025	0.48372	0.202656	0.474755	0.251932	0.568514	0.912363	1.62276	0.443523	NA	1.13925	0.312195	0.878394	NA	1.32965	1.53401	0.39335	0.478978	1.67656	0.116749	0.941265	0.953369	0.41723
ENSMUSG00000001995	Sipa1l2	7.9417	7.37182	7.86616	6.82642	7.59516	7.52351	8.05832	8.21723	7.71121	8.10254	6.2231	6.06757	6.10867	6.30248	6.06111	6.14575	6.3477	6.20141	5.97586	6.35655	6.55075	6.13693	8.11082	8.18286	8.18034	7.72141	6.13311	6.16978	6.17499	6.34807	8.15801	109.515	-0.0645865	0.748125	0.87849	93.7279	0.107174	0.64543	0.757985	143.674	-0.0820373	0.700116	0.76327	396.951	-2.47591	4.28421e-69	7.86588e-68	66.3985
ENSMUSG00000001998	Ap4e1	4.87033	4.31031	5.07265	5.45034	5.16343	5.28972	4.52972	4.79139	5.05948	5.26102	3.88471	3.92951	3.9805	3.84842	3.78919	4.27162	3.65781	4.32736	4.44195	4.35859	3.96839	4.14961	4.91441	4.97425	5.17967	4.97984	3.93158	3.96975	4.14237	4.15887	5.02278	25.3235	-0.0528885	0.892549	0.957099	24.0507	-0.311224	0.455004	0.594016	33.2975	-0.132895	0.698821	0.762168	48.3385	-1.32724	4.23784e-06	1.04034e-05	17.1763
ENSMUSG00000001999	Blvra	5.55013	4.94598	4.97044	5.76148	4.82941	5.36134	5.97352	5.97757	5.59674	5.26574	5.36868	5.44759	5.62984	5.38546	5.12044	4.94124	5.22611	6.01356	5.41392	5.28273	5.30571	5.28764	6.64795	6.61198	6.49481	5.42323	5.48204	5.14905	5.5512	5.29203	6.58492	76.5115	0.429523	0.078807	0.229154	80.1003	-0.0606507	0.846453	0.899308	97.6684	0.519214	0.0182992	0.032298	164.475	-1.2068	2.61001e-11	8.92265e-11	47.9146
ENSMUSG00000002006	Pdzd4	6.54037	6.0324	5.39691	6.06614	6.58536	6.90156	6.71076	6.69789	6.60352	6.73834	5.82858	5.50009	5.86937	5.84059	5.82611	5.26079	4.58622	4.9017	4.30315	4.92268	4.94016	4.40067	3.49442	4.58586	4.26822	6.42732	5.73268	5.6425	4.59702	4.75451	4.11617	109.843	0.0419076	0.854365	0.93808	65.5872	1.75988	1.28467e-07	8.90954e-07	97.3132	1.64807	2.49687e-09	9.48554e-09	74.1099	2.63649	9.81569e-14	3.77046e-13	43.0086
ENSMUSG00000002007	Srpk3	-0.211542	0.900481	0.10083	0.234529	0.0279285	-0.0596561	0.600246	-0.24836	0.829353	-0.315713	1.0167	0.967281	0.274999	-0.455523	-0.538821	-0.342632	-0.230463	0.329942	-0.377119	-0.0505523	0.314388	-0.110811	2.69115	2.61584	2.751	0.18581	0.752993	-0.445659	-0.0925468	0.0510079	2.686	2.31257	4.16052	0.00972295	0.0470623	2.39593	2.27538	0.131392	0.232955	3.76503	2.0747	0.0616861	0.097221	26.9001	-3.11818	2.21899e-11	7.61895e-11	0.21289
ENSMUSG00000002010	Idh3g	8.88406	8.61003	8.54039	8.88002	8.78064	8.52641	8.92164	8.99235	8.78069	8.84019	8.43761	8.47752	8.52269	8.37512	8.50834	8.61467	8.62186	8.482	8.47806	8.84502	8.79284	9.02266	8.85153	8.72986	8.83197	8.77564	8.47927	8.49938	8.52731	8.88684	8.80445	685.744	-0.0426824	0.70315	0.854612	591.372	0.0961817	0.442673	0.582798	987.689	-0.320348	0.0130089	0.023622	801.097	-0.139833	0.211408	0.268616	415.568
ENSMUSG00000002012	Pnck	7.51256	6.38211	6.73621	6.97188	6.5731	6.8172	6.93606	7.17792	7.04117	6.96822	6.44643	6.57491	6.29909	6.1149	6.38641	6.23843	6.16654	5.69749	5.41921	6.19597	6.16375	5.60819	4.86984	4.94519	4.80191	6.91164	6.44014	6.24658	5.76108	5.9893	4.87231	167.574	0.253115	0.157183	0.362015	121.71	1.12281	3.5325e-05	0.000169524	185.116	0.851691	0.000313995	0.00073758	119.256	2.67683	3.43054e-27	2.20038e-26	74.7105
ENSMUSG00000002014	Ssr4	6.16613	5.9521	6.696	6.57507	6.14326	6.42398	6.24296	6.53198	6.10181	6.39413	6.67432	6.66152	6.67972	6.5407	6.52788	6.61442	6.98762	7.25238	7.32193	7.11884	7.01378	7.08216	8.75553	8.76285	8.7743	6.32274	6.67185	6.561	7.18731	7.07159	8.76423	183.864	0.148451	0.34425	0.586678	215.974	-0.582196	0.000686365	0.00252212	281.095	-0.306692	0.0371825	0.0616987	702.508	-2.44437	1.60437e-102	5.83688e-101	143.939
ENSMUSG00000002015	Bcap31	6.29337	5.99631	6.59998	5.99543	6.44733	5.8758	6.08362	6.39013	6.0555	6.11617	6.84612	6.98804	7.16309	7.1339	6.89978	7.0896	7.60259	7.83988	8.13691	7.95735	7.96271	7.97265	8.46989	8.68145	8.76096	6.18536	6.99909	7.04109	7.85979	7.96424	8.63743	257.511	-0.0666	0.672125	0.835992	344.008	-1.03245	7.33517e-07	4.54988e-06	500.624	-1.04684	1.94593e-12	9.07025e-12	654.09	-1.85661	6.39475e-34	5.05198e-33	242.232
ENSMUSG00000002017	Fam98a	5.59464	5.73765	5.48504	5.10261	5.7356	4.67344	5.39013	4.89761	5.27309	5.30629	5.45766	5.45423	5.45728	5.58161	5.30685	5.26543	5.93138	6.19809	5.77568	5.91339	5.5513	5.77693	6.27755	5.89234	5.91295	5.31961	5.45639	5.38463	5.96838	5.74721	6.02761	83.0641	0.0713155	0.751501	0.880242	96.1379	-0.600657	0.0103463	0.0280857	118.462	-0.179948	0.393165	0.478825	116.85	-0.50769	0.0182198	0.0294921	65.2119
ENSMUSG00000002020	Ltbp2	0.254988	0.185645	0.521057	0.655903	2.6834	2.85843	0.603354	1.88657	2.05989	1.86845	0.385693	0.485717	0.356004	0.00788128	-0.0719312	0.120358	2.91981	1.73997	2.37829	1.44853	1.5113	0.7766	0.0134058	0.000122634	0.823486	1.35777	0.409138	0.0187694	2.34602	1.24548	0.279005	0.634531	2.27999	0.329814	NA	9.83677	-3.8851	1.05851e-05	5.51941e-05	4.03485	-1.90421	0.0627521	0.0985114	1.1449	0.776393	0.674731	0.725631	6.49139
ENSMUSG00000002028	Kmt2a	8.36655	8.09412	8.04299	7.6196	7.7715	7.64674	7.46388	7.54486	7.78539	7.30709	7.35271	7.1115	7.07596	7.31702	7.34646	7.24833	6.21605	6.39622	6.60858	5.90071	6.12597	5.95085	6.51973	6.6437	6.7508	7.76427	7.18006	7.30394	6.40695	5.99251	6.63808	315.28	-0.177191	0.213426	0.439916	190.001	1.23533	7.28515e-09	5.97672e-08	241.95	1.98457	3.19794e-25	2.70409e-24	246.795	1.08138	1.3685e-09	4.25207e-09	142.41
ENSMUSG00000002031	Ift46	4.68878	5.13774	5.15815	5.43273	5.01135	5.18103	5.17582	4.84637	5.03428	4.71896	5.64581	5.62642	5.55925	5.77202	5.63583	5.7081	5.5549	5.58037	5.58601	5.7602	5.72304	5.92056	5.53142	5.51511	5.6064	5.03852	5.61049	5.70532	5.57376	5.80127	5.55097	109.445	-0.139775	0.473495	0.700958	87.4858	0.209837	0.340318	0.481751	136.29	-0.0201497	0.915513	0.939212	103.338	0.399417	0.0479823	0.0720151	63.866
ENSMUSG00000002032	Tmem25	4.59318	4.99951	6.28792	3.24298	5.75051	5.50419	5.20038	4.55555	5.1511	5.03805	6.1365	6.18597	5.95242	5.95539	5.52392	5.41652	7.11184	7.36431	7.31944	5.07441	5.39389	5.158	3.85394	4.56982	3.9243	5.03234	6.09163	5.63194	7.2652	5.20877	4.11602	136.22	0.578823	0.00476535	0.0264015	264.573	-1.37316	7.16833e-16	1.12678e-14	145.067	1.47425	1.94783e-12	9.07653e-12	102.773	3.14514	1.6221e-25	9.86984e-25	166.925
ENSMUSG00000002033	Cd3g	0	0	0	0	0	0	0	0	0	0	0	0	0	0	0	0	0	0	0	0	0	0	0	0	0	NA	NA	NA	NA	NA	NA	NA	NA	NA	NA	NA	NA	NA	NA	NA	NA	NA	NA	NA	NA	NA	NA	NA
ENSMUSG00000002043	Trappc6a	1.04673	1.5227	1.30244	2.80251	1.24507	1.17646	2.20806	2.68031	2.0947	1.44416	2.28376	2.04786	1.80362	2.27479	1.86688	1.73172	1.02386	2.48666	2.65972	2.87699	3.59811	3.48331	3.79022	3.73076	3.84944	1.75231	2.04508	1.9578	2.05674	3.31947	3.79014	7.00795	0.156394	0.830618	0.924887	7.08767	-0.280357	0.727064	0.818708	22.4135	-1.8341	0.000111496	0.000277347	26.7261	-2.3883	8.35937e-09	2.47715e-08	4.64968
ENSMUSG00000002052	Supt6	9.09925	8.85582	9.25076	8.68696	9.12419	8.80682	9.36182	9.30934	8.91766	8.93225	8.69906	8.48398	8.51482	8.88452	8.91671	8.78118	7.79693	7.60834	7.41503	7.61064	7.34754	7.59582	8.28392	8.26647	8.182	9.03449	8.56595	8.8608	7.60676	7.518	8.24413	899.092	-0.412626	0.000172789	0.00153723	471.593	1.52661	6.97764e-18	1.26708e-16	654.378	1.73584	5.59264e-28	5.28759e-27	694.787	0.760817	1.21229e-08	3.55495e-08	402.169
ENSMUSG00000002055	Spag5	3.55419	3.79397	2.12741	3.0081	4.6845	2.97486	4.02252	4.16868	2.90179	3.56071	3.01591	2.9162	3.16815	2.57994	2.14846	2.01074	5.73589	5.82408	5.76363	5.55183	5.5709	5.77208	3.64229	2.68788	2.73791	3.47967	3.03342	2.24638	5.77454	5.6316	3.02269	8.40936	1.47038	0.0421914	0.144468	79.2785	-3.74031	5.93085e-38	2.72955e-36	95.8594	-3.46228	1.11926e-34	1.34774e-33	13.2311	0.18884	0.743345	0.786964	52.8118
ENSMUSG00000002057	Foxn1	0	0	0	0	0	0	0	0	0	0	0	0	0	0	0	0	0	0	0	0	0	0	0	0	0	NA	NA	NA	NA	NA	NA	NA	NA	NA	NA	NA	NA	NA	NA	NA	NA	NA	NA	NA	NA	NA	NA	NA
ENSMUSG00000002058	Unc119	2.77895	3.90559	2.87909	3.07087	3.71488	3.74579	4.36647	4.01714	3.40789	3.77456	4.10139	4.27651	4.18258	4.18708	3.68746	3.02366	3.5317	4.81857	4.15683	4.96414	4.99961	4.75744	3.2893	3.44475	2.54585	3.56612	4.18683	3.63273	4.16903	4.90706	3.0933	33.6115	0.626672	0.09441	0.257643	37.2431	-0.0754919	0.860339	0.908757	73.1761	-0.770422	0.00194468	0.00407924	29.4437	1.94406	5.60261e-06	1.35928e-05	20.911
ENSMUSG00000002059	Rab34	3.60555	2.75064	5.19187	3.21659	2.40472	1.60488	2.82378	3.04304	3.14182	2.97205	2.21824	1.8366	2.11017	2.91396	2.29034	1.21437	1.99394	2.54976	1.9695	5.3828	5.28388	5.58677	4.10431	4.19081	4.0415	3.07549	2.055	2.13956	2.17107	5.41782	4.11221	5.90534	-0.559114	0.505073	0.723189	4.43507	-0.101342	0.911142	0.943261	88.8996	-4.75667	2.66629e-36	3.36959e-35	24.2373	-2.95451	1.82408e-10	5.96404e-10	3.64271
ENSMUSG00000002064	Sdf2	6.0541	6.26553	5.50725	5.96088	6.33132	6.18902	5.47428	5.89297	6.47812	5.99552	6.84491	6.77297	6.67702	6.74606	6.7369	6.89815	7.78297	7.50916	7.39998	7.61632	7.78406	7.67807	7.30012	7.16287	6.88787	6.0149	6.76496	6.7937	7.56404	7.69281	7.11695	225.123	-0.0377852	0.801727	0.909608	289.93	-0.911687	2.86862e-07	1.89046e-06	430.785	-0.989377	4.9595e-12	2.25505e-11	266.755	-0.180043	0.313384	0.378458	203.833
ENSMUSG00000002068	Ccne1	5.38686	3.47917	2.39069	3.2069	2.90529	3.44278	4.19058	4.12701	4.33012	4.45673	5.15397	5.42571	5.15761	4.9669	4.93116	4.61517	4.88744	5.30556	5.21645	3.52853	3.49719	3.30512	3.03048	3.34164	3.13506	3.79161	5.24576	4.83774	5.13649	3.44361	3.16906	88.2912	0.515698	0.0254327	0.0988253	85.7823	0.25963	0.305331	0.444604	77.233	2.9071	9.73062e-22	7.17298e-21	64.4863	3.43916	7.10228e-21	3.70962e-20	49.1964
ENSMUSG00000002076	Hsf2bp	-1.86544	-1.87999	-1.82511	-1.80876	-1.83403	-1.84475	-1.90656	-1.87313	-1.88613	-1.88814	-1.87001	-1.93864	-1.93728	-1.92102	-1.93752	-1.89424	-1.86918	-1.81725	-1.90218	-1.93733	-1.93391	-1.93767	-1.8045	-1.80791	-1.80437	-1.8612	-1.91531	-1.91759	-1.86287	-1.9363	-1.80559	0.101503	-0.0958564	0.981258	NA	0.244476	-1.28254	0.748136	NA	0.132477	0.67431	0.868747	NA	0.74749	-2.18082	0.321165	NA	0.106445
ENSMUSG00000002083	Bbc3	0.850407	2.5653	1.07999	3.26549	3.43004	0.966848	1.67512	0.808486	1.65148	0.729887	2.01529	2.13137	2.07749	1.51002	2.37074	2.03211	1.84682	2.06005	1.47609	1.87463	1.82104	0.805161	3.52257	2.73583	2.79139	1.7023	2.07472	1.97096	1.79432	1.50028	3.0166	9.00518	0.0299097	0.963414	0.986619	6.81908	0.602717	0.419334	0.561124	8.69386	1.19845	0.0968378	0.14462	18.3646	-1.33005	0.00760255	0.0131478	4.571
ENSMUSG00000002100	Mybpc3	0.832676	1.34845	0.425134	0.541337	1.58511	1.01157	1.40098	0.173235	0.133627	1.25494	0.741602	1.17129	0.905783	0.0427315	-0.00189489	0.110393	2.182	1.59894	1.10063	0.322868	0.785427	0.821451	0.921405	0.412904	0.709324	0.870706	0.93956	0.05041	1.62719	0.643249	0.681211	2.23361	4.09214	0.0110088	0.0519323	7.52872	-1.33748	0.0848207	0.163863	4.34324	1.02726	0.276174	0.356415	3.80109	1.00484	0.317609	0.382837	3.86708
ENSMUSG00000002102	Psmc3	8.15451	8.11129	8.01014	7.99665	8.13506	7.57511	8.18202	8.22435	8.06955	8.19497	8.65614	8.52563	8.57274	8.62446	8.66372	8.61858	8.22088	8.08762	8.0735	7.96927	7.96318	7.93957	8.7016	8.58876	8.73673	8.06537	8.58483	8.63559	8.12734	7.95734	8.6757	856.853	-0.0828925	0.404278	0.642251	595.384	0.790069	1.81567e-09	1.59092e-08	794.219	1.11043	1.26435e-19	8.50259e-19	883.823	0.190046	0.104987	0.145637	424.991
ENSMUSG00000002103	Acp2	6.36403	6.89918	7.04863	6.35647	6.76569	6.76629	6.72844	6.75845	6.7376	6.74438	7.18644	7.084	7.17994	7.18973	7.27575	7.21245	7.51971	7.63481	7.7474	8.19586	8.18452	8.1763	8.90349	9.02525	8.99223	6.71692	7.15013	7.22598	7.63397	8.18556	8.97366	278.51	-0.126151	0.352796	0.59468	292.653	-0.522263	0.000606671	0.00225525	560.308	-1.15298	1.21755e-19	8.19463e-19	799.448	-2.10575	4.97533e-73	1.00226e-71	209.694
ENSMUSG00000002104	Rapsn	-0.146579	-0.279731	0.222404	2.71725	0.140792	0.0427431	-0.469712	-0.217039	-0.326841	-0.34091	-0.0106982	-0.116974	-0.0542795	-0.569804	-0.717188	0.434637	-0.180834	-0.646731	-0.439126	0.649904	0.406661	0.246585	4.87847	5.98357	5.83554	0.134238	-0.0606507	-0.284118	-0.42223	0.434383	5.56586	0.917147	1.07838	0.59912	NA	0.494898	1.77464	0.492043	NA	2.00107	-0.838094	0.515749	0.597498	50.4958	-6.32312	3.56826e-19	1.73812e-18	0.22897
ENSMUSG00000002105	Slc39a13	2.85521	3.43822	3.65891	3.31318	2.97862	3.99692	3.52797	3.1403	3.54305	3.07328	2.91043	2.69678	2.85436	3.16996	2.3517	2.25974	4.13944	4.26655	3.59741	3.25579	3.82982	4.00047	3.60116	3.80404	3.651	3.35257	2.82052	2.5938	4.00113	3.69536	3.6854	9.94482	0.26438	0.679942	0.840722	22.1556	-1.81271	7.30772e-05	0.000333589	24.1334	-1.26475	0.00403314	0.00802696	19.6216	-1.12651	0.00902905	0.015405	14.7986
ENSMUSG00000002107	Celf2	8.26257	8.73825	8.8035	8.02203	8.10353	8.61485	7.94739	7.54693	8.20569	7.8745	9.53441	9.52725	9.55356	9.56821	9.71091	9.70121	9.15141	8.9261	9.14229	8.6783	8.72287	8.5802	9.51098	9.41862	9.46617	8.21192	9.53841	9.66011	9.07327	8.66046	9.46525	1861.94	-0.176121	0.0467896	0.155621	1253.32	0.776463	1.01742e-09	9.21981e-09	1563.03	1.42868	2.06249e-35	2.53396e-34	1734.14	0.406551	2.23745e-05	5.15904e-05	933.476
ENSMUSG00000002108	Nr1h3	0.904118	-0.330027	1.38415	0.136232	-0.0401119	-0.11487	0.725889	0.389936	-0.349473	-0.355737	-0.0524256	-0.114775	-0.489208	0.0145067	-0.500236	-0.374364	-0.285338	0.917508	0.152548	1.31743	2.13103	2.13133	-0.445404	-0.454059	0.0252722	0.235011	-0.218803	-0.286698	0.261573	1.85993	-0.291397	0.608463	0.596131	0.806419	NA	1.51453	-1.85451	0.271415	0.407165	12.5633	-4.4266	1.04827e-06	3.24478e-06	0.640981	0.984409	0.684301	NA	0.960644
ENSMUSG00000002109	Ddb2	3.49606	3.68376	4.78693	3.86176	3.23108	3.82367	2.76322	3.24266	3.29677	2.87653	3.29436	3.00726	2.87358	3.19117	2.92701	2.79237	2.12683	2.30027	2.52508	2.63674	3.75564	3.72061	3.5567	3.83549	3.28016	3.50624	3.0584	2.97018	2.31739	3.371	3.55745	14.9144	0.142005	0.779302	0.896653	9.33665	1.59761	0.0244003	0.0585583	23.7163	-0.392487	0.42199	0.508605	21.4186	-0.488143	0.262968	0.324193	5.93976
ENSMUSG00000002111	Spi1	1.89749	2.32815	0.896792	2.80208	1.79028	1.64259	2.0922	0.420158	1.57376	1.54254	0.359149	0.230288	-0.241131	-0.0683118	-0.292949	0.206531	0.459628	-0.184516	0.125263	-0.248017	0.428062	0.262709	10.2505	10.271	10.1842	1.6986	0.116102	-0.0515767	0.133458	0.147585	10.2353	0.376804	1.5601	0.607469	NA	0.340911	1.26782	0.713502	NA	0.852778	0.528423	0.796917	0.844555	899.399	-10.8173	1.50598e-49	1.75731e-48	0
ENSMUSG00000002129	Sf3a1	5.56999	6.67281	6.20911	6.70509	6.91029	6.60769	6.25608	6.00578	6.33231	5.98065	7.03516	7.0433	6.92785	7.11228	7.07667	7.13406	7.39665	7.51227	7.44046	7.52473	7.70551	7.50852	7.90092	7.74629	7.67617	6.32498	7.0021	7.10767	7.44979	7.57959	7.77446	274.815	-0.149447	0.272429	0.510928	277.74	-0.453935	0.0022152	0.00721958	414.786	-0.530845	0.000289546	0.00068359	390.625	-0.72609	3.8358e-07	1.01863e-06	201.513
ENSMUSG00000002147	Stat6	3.66776	4.37676	6.17215	3.95181	4.34106	3.09468	3.0236	3.80825	4.13287	3.44092	4.23402	3.96896	4.12081	2.80916	2.8089	3.34411	3.03554	3.21664	3.53738	3.11874	2.94486	2.6632	7.57835	7.48247	7.80473	4.00099	4.10793	2.98739	3.26319	2.90893	7.62185	22.7498	1.76625	0.000143022	0.00129687	21.4672	1.39869	0.00265512	0.00847045	27.9617	2.09059	7.77937e-07	2.43663e-06	379.377	-4.20218	2.44643e-106	9.42266e-105	7.38179
ENSMUSG00000002190	Clgn	4.77134	4.17214	3.61766	3.84077	4.35721	5.55838	4.7828	5.44064	5.2342	5.13852	4.57762	4.35488	4.33381	4.3748	4.24924	4.45044	5.23911	5.58992	5.95513	3.22019	3.35735	2.95787	4.97478	5.06672	5.18267	4.69136	4.4221	4.35816	5.59472	3.17847	5.07472	39.6331	0.111163	0.72421	0.866592	71.9718	-1.55152	2.02901e-07	1.366e-06	31.9851	2.33018	1.31509e-08	4.75587e-08	58.6522	-0.616014	0.0197216	0.0317307	49.2206
ENSMUSG00000002204	Napsa	-1.80895	-1.82665	-1.75991	-1.74002	-1.77076	-1.78379	-1.71897	-1.81832	-1.83412	-1.83657	-1.8958	-1.89614	-1.89426	-1.87656	-1.89458	-1.84399	-1.81351	-1.89035	-1.85364	-1.89431	-1.89224	-1.89478	-1.59483	-1.73899	-1.73468	-1.78981	-1.8954	-1.87171	-1.8525	-1.89378	-1.6895	0	NA	NA	NA	0	NA	NA	NA	0	NA	NA	NA	0.848101	-3.56489	0.107976	0.149193	0
ENSMUSG00000002205	Vrk3	4.23159	5.02323	4.61172	6.05752	4.31257	4.30322	4.78715	4.54526	4.73872	4.88255	4.29212	4.16174	4.32845	4.57529	4.47671	4.89424	4.86768	4.9063	4.47229	5.80026	5.80748	5.9269	5.85422	5.43983	5.37246	4.74935	4.26077	4.64875	4.74875	5.84488	5.5555	39.0176	-0.595585	0.0619092	0.191309	34.9226	-0.610891	0.0765132	0.15093	101.507	-2.03987	3.56624e-19	2.35081e-18	69.9428	-1.60667	7.71292e-09	2.28989e-08	29.3399
ENSMUSG00000002210	Smg9	5.81755	5.46635	5.19458	5.7545	5.14616	4.77172	5.35462	5.10414	5.29402	5.29287	5.77882	5.63831	5.82198	5.15063	5.1728	5.44808	5.65602	5.18418	5.47529	5.31773	5.45162	5.91164	6.08284	6.17015	6.41897	5.31965	5.74637	5.25717	5.4385	5.56033	6.22399	93.5054	0.698019	0.00161011	0.0106509	86.9028	0.618432	0.0153488	0.0394527	128.897	0.462469	0.0534893	0.0854853	147.963	-0.357448	0.0643904	0.093964	46.694
ENSMUSG00000002221	Paxip1	5.9172	5.70646	6.30434	5.93905	5.88523	5.86672	5.62383	5.60504	5.66935	5.31026	5.19337	5.20811	5.10797	5.35077	5.22172	5.26507	4.69233	4.77928	4.58161	5.20207	5.07621	4.92912	5.01513	5.34937	5.30714	5.78275	5.16982	5.27919	4.68441	5.06914	5.22388	72.2777	-0.164122	0.482562	0.707579	47.224	0.883528	0.00348248	0.0107768	78.154	0.396576	0.0984256	0.146673	71.3638	0.226101	0.355779	0.422033	35.1737
ENSMUSG00000002222	Rmnd5a	6.46113	6.56359	6.8621	7.12178	7.06377	6.98217	7.06342	7.05451	6.97632	6.72331	6.78934	6.7331	7.03887	6.72706	6.8594	7.10342	7.58427	7.69856	7.93673	6.66579	6.50044	6.22741	7.17414	7.04648	7.16673	6.88721	6.85377	6.89663	7.73985	6.46455	7.12912	232.659	-0.071899	0.669625	0.833874	313.283	-1.05809	1.87622e-08	1.45828e-07	232.908	0.786218	0.000153851	0.000376794	261.333	-0.0695258	0.675153	0.726034	221.199
ENSMUSG00000002227	Mov10	0.69066	2.18765	2.36163	2.97847	1.73263	3.53831	1.9954	2.28702	1.5733	1.54893	0.704309	1.08918	1.22113	0.840786	0.652485	0.51222	0.666928	1.04875	0.465317	1.69692	1.62032	1.81439	3.966	4.0121	3.92169	2.0894	1.00487	0.668497	0.726998	1.71054	3.9666	1.5404	1.35766	0.40111	0.6392	1.34318	1.25989	0.47009	0.607667	4.91484	-1.23076	0.155354	0.219264	31.5783	-4.59634	8.25013e-17	3.63435e-16	0.453105
ENSMUSG00000002228	Ppm1j	0.487131	-0.55506	-0.266047	-0.1799	-0.31302	-0.369454	-0.181543	-0.518976	-0.573449	-0.065919	-0.465831	-0.351139	-0.125835	-0.622813	-0.646057	-0.586297	0.729226	0.604397	0.145993	-0.641845	-0.637154	-0.649299	0.00548854	0.811736	0.378268	-0.253624	-0.314268	-0.618389	0.493205	-0.642766	0.398497	0.616957	2.19522	0.357078	NA	3.51757	-2.47371	0.0271962	0.0640848	0.804284	2.95968	0.184372	0.253626	3.59881	-2.16392	0.0501966	0.0750447	2.07457
ENSMUSG00000002233	Rhoc	4.11663	4.09068	4.93075	2.05782	4.10833	3.92528	3.7538	2.95593	3.67142	3.8028	2.04385	2.25246	1.87232	2.27308	0.978861	1.33009	1.53547	1.43561	1.74117	5.29451	5.10166	5.62255	5.54986	5.65091	5.40301	3.74134	2.05621	1.52734	1.57075	5.33957	5.53459	3.10553	1.23434	0.317673	0.560117	2.38021	2.05485	0.14285	0.249216	76.6154	-4.63287	3.33204e-30	3.4046e-29	74.5088	-4.79578	4.81316e-35	3.92046e-34	0.855379
ENSMUSG00000002240	Prr27	0	0	0	0	0	0	0	0	0	0	0	0	0	0	0	0	0	0	0	0	0	0	0	0	0	NA	NA	NA	NA	NA	NA	NA	NA	NA	NA	NA	NA	NA	NA	NA	NA	NA	NA	NA	NA	NA	NA	NA
ENSMUSG00000002249	Tead3	-0.107665	-0.164309	1.03077	0.31341	1.8447	0.0420248	0.641915	0.570989	0.859863	-0.195063	-0.13042	-0.449152	0.0531504	-0.308239	-0.371783	-0.21745	-0.122416	-0.342343	-0.245724	2.26129	2.12313	2.45636	0.758623	1.08156	1.61318	0.483663	-0.175474	-0.299157	-0.236828	2.28026	1.15112	0.272332	1.00002	0.775569	NA	0.245988	0.727195	0.855217	NA	14.6879	-5.62132	2.88613e-07	9.35201e-07	3.88959	-3.77552	0.00455551	0.00811523	0
ENSMUSG00000002250	Ppard	2.85403	3.97805	2.9649	4.39435	3.5558	4.25489	3.95252	3.2199	4.29398	4.07201	3.18194	3.25601	3.50394	3.479	3.01729	2.93192	5.28085	5.15301	4.55102	4.26657	4.39457	4.24323	5.1252	5.23595	5.58686	3.75404	3.31396	3.14273	4.99496	4.30146	5.316	13.7887	0.241707	0.648773	0.821247	42.7257	-2.40583	2.09887e-10	2.03466e-09	33.5863	-1.29588	0.000215413	0.00051732	61.6182	-2.66759	1.04245e-17	4.77376e-17	28.9851
ENSMUSG00000002257	Def6	0.154873	1.26958	0.469246	0.615481	3.17467	1.73193	1.6645	0.108415	0.0303225	1.94155	-0.0100719	-0.0801068	0.240869	1.26971	0.195827	-0.0178774	0.924845	0.641498	-0.0644294	-0.264824	0.624193	0.164822	3.83442	3.81187	3.79351	1.11606	0.0502301	0.482554	0.500638	0.17473	3.81327	1.44462	-1.70355	0.307013	NA	1.088	-1.20939	0.50644	NA	1.03213	-0.299892	0.870539	0.903766	33.2398	-6.45015	3.27754e-13	1.23284e-12	1.20345
ENSMUSG00000002265	Peg3	9.67122	9.39739	8.64135	9.0278	9.27539	9.07344	9.52159	9.40064	9.52972	9.17686	9.10345	9.12019	9.08938	9.08645	9.08423	9.03971	8.46447	8.45806	8.1589	7.9162	7.69164	7.6298	7.15088	7.52159	7.14562	9.27154	9.10434	9.07013	8.36048	7.74588	7.2727	1203.81	0.0297779	0.737518	0.872945	795.399	1.16454	2.23963e-15	3.42831e-14	973.006	2.14055	3.227e-49	6.05637e-48	778.672	2.91926	2.1665e-72	4.29295e-71	539.182
ENSMUSG00000002266	Zim1	2.99856	2.7628	2.72413	0.84507	2.59003	2.17077	1.12398	1.49249	2.56425	1.60066	0.570526	0.502923	0.54736	1.56494	0.150202	1.25504	0.45649	0.869932	0.823873	1.02474	1.65308	1.5888	0.233396	0.656232	0.993114	2.08727	0.540269	0.990063	0.716765	1.42221	0.627581	2.44496	-1.71564	0.202277	0.424975	1.05861	-0.388722	0.820614	NA	3.97031	-2.18367	0.0371484	0.0616548	1.24882	-0.0201853	0.990237	0.992505	1.56208
ENSMUSG00000002274	Metrn	4.52769	4.32044	2.63191	3.35255	5.05115	3.95598	4.94394	3.82493	4.68845	3.97821	1.60483	0.900176	1.28166	1.0096	1.22876	1.24284	2.77663	2.2425	1.67691	7.10269	7.24927	7.57453	2.71078	3.48935	3.28521	4.12753	1.26222	1.1604	2.23201	7.30883	3.16178	0.822495	1.39143	0.510303	NA	2.99742	-1.91002	0.115993	0.211016	371.626	-8.74825	1.23532e-45	2.11428e-44	8.47743	-3.36078	8.80034e-05	0.000192091	1.77992
ENSMUSG00000002279	Lmf1	4.13137	4.12198	5.21497	4.89864	5.06081	4.57671	4.21243	4.6331	4.6559	4.51062	4.28797	4.41991	4.57838	4.08946	4.36997	4.621	4.47252	4.8476	4.44088	6.24135	6.46821	6.56837	6.18339	6.44427	6.2396	4.60165	4.42875	4.36014	4.587	6.42598	6.28909	35.452	0.0916309	0.787561	0.902205	33.8514	-0.14015	0.695529	0.796136	159.586	-2.53994	1.15461e-31	1.23461e-30	120.191	-2.29713	1.76968e-25	1.07512e-24	22.8518
ENSMUSG00000002280	Ciao3	5.34623	4.48839	4.24623	3.95951	5.58241	3.15091	4.33986	4.45708	4.24948	4.64179	5.10957	4.79666	5.00039	4.83326	4.88049	5.08076	5.67616	5.11328	5.05732	5.09195	5.10108	5.26554	5.37126	5.41179	5.31077	4.44619	4.96887	4.93151	5.28225	5.15286	5.36461	64.3052	0.0560835	0.827379	0.923352	66.5359	-0.281544	0.354136	0.495664	85.2429	-0.0147582	0.950346	0.963864	80.4154	-0.243546	0.300404	0.364525	45.5195
ENSMUSG00000002289	Angptl4	0.132899	1.2846	0.464326	2.26522	2.86031	1.20441	1.69216	0.884541	0.741717	1.50826	0.238827	-0.136351	0.210153	-0.222225	0.162019	-0.0536438	0.108671	0.631261	-0.104459	4.37044	4.10036	4.30658	-0.213599	-0.234409	0.391085	1.30384	0.10421	-0.0379501	0.211824	4.25912	-0.0189747	0.619488	0.847559	0.712975	NA	0.721393	-0.0142291	0.994728	NA	52.3246	-6.48959	2.51406e-17	1.53227e-16	0.735151	1.1882	0.584145	NA	0.310785
ENSMUSG00000002297	Dbf4	0.463673	0.403664	0.67908	1.66018	0.608325	2.33843	0.768621	1.04271	1.29249	0.914665	0.869711	1.08658	1.16491	1.16997	0.76092	1.46572	1.76899	0.223104	0.319573	1.94888	1.35133	1.76871	2.42174	2.428	2.59124	1.01718	1.0404	1.1322	0.770555	1.68964	2.48033	3.81865	-0.228346	0.816909	0.917704	2.90896	0.529109	0.716289	0.81054	7.23561	-1.21109	0.0973444	0.145314	12.2385	-2.45375	4.36861e-05	9.81583e-05	2.2798
ENSMUSG00000002307	Daxx	3.28468	4.33693	4.07622	3.77044	4.67761	5.19367	4.23652	3.82169	3.50478	3.18076	4.81816	4.56594	4.61631	4.56141	4.54785	4.28574	3.75225	4.39566	4.6	4.54459	4.83241	5.04051	5.25049	5.14218	5.26803	4.00833	4.6668	4.465	4.2493	4.80584	5.22023	50.5891	0.254204	0.37109	0.610977	40.425	0.638372	0.0733666	0.146078	71.4501	0.0295765	0.911903	0.936038	74.5582	-0.459306	0.0540209	0.0802135	24.836
ENSMUSG00000002308	Cd320	4.09664	3.36995	3.76427	4.79757	2.37355	3.7072	3.84084	3.29703	3.86117	3.52134	4.37001	4.45645	4.26839	3.61374	4.07523	4.27906	4.76429	4.80757	4.74691	5.53925	5.67622	6.08431	3.75439	4.2569	4.41401	3.66296	4.36495	3.98934	4.77293	5.76659	4.14176	36.8982	0.534398	0.116158	0.295959	45.7718	-0.420825	0.147422	0.255377	119.935	-1.69792	4.24328e-12	1.94128e-11	40.5861	0.602767	0.0707894	0.10242	27.7954
ENSMUSG00000002319	Ipo4	5.92055	5.13931	5.4774	6.50854	5.99641	4.89055	5.54636	5.75369	5.38052	5.58502	5.38917	5.33338	5.60584	5.05494	5.6093	5.20908	5.61914	5.11077	4.15115	4.73771	4.36398	4.91747	5.12204	4.93009	4.62697	5.61983	5.44279	5.2911	4.96036	4.67305	4.89303	86.6263	0.134094	0.582593	0.776756	68.0988	0.684246	0.0989026	0.185498	83.3207	1.32982	6.73112e-07	2.12091e-06	76.3177	1.07856	4.76001e-05	0.000106512	43.7983
ENSMUSG00000002320	Tm9sf1	5.81505	5.28837	5.08082	4.23234	5.31623	5.4149	5.03962	5.3271	4.93289	4.75009	5.14543	5.24327	5.21255	5.56597	5.49882	5.33683	5.77793	5.92031	5.82665	5.88288	6.0545	6.09983	6.43026	6.37312	6.05461	5.11974	5.20042	5.46721	5.84163	6.0124	6.286	77.952	-0.416707	0.0662637	0.201696	81.4908	-0.767522	0.000682876	0.00251062	125.353	-0.900336	6.33814e-06	1.81147e-05	126.253	-1.21831	6.7513e-09	2.01312e-08	63.1435
ENSMUSG00000002324	Rec8	3.27113	2.34136	1.52508	1.64058	3.78383	3.96926	3.75442	3.96403	3.60516	3.57123	1.81607	1.87313	2.30314	0.901031	0.790974	1.55641	3.65029	3.67272	3.87389	2.38723	2.54065	2.90934	1.61761	2.70178	2.33272	3.14261	1.99745	1.0828	3.7323	2.6124	2.21737	3.22875	3.44671	0.019417	0.0810422	18.8688	-2.72647	7.36217e-08	5.2699e-07	10.4763	-0.920124	0.132715	0.190939	6.96306	-0.256548	0.736573	0.781258	11.6105
ENSMUSG00000002325	Irf9	0.955653	2.48919	1.30289	2.95061	3.23188	3.28144	1.84878	0.888553	2.39306	2.36176	1.36831	1.24263	1.15771	1.37062	0.3066	0.705878	0.923023	1.87822	1.22527	3.66599	4.09891	3.88219	6.46528	6.07581	6.0878	2.17038	1.25622	0.794367	1.34217	3.88236	6.20963	1.74698	1.44611	0.362603	0.603603	2.18139	-0.0493984	0.969415	0.980521	25.7766	-3.81078	2.99886e-12	1.38359e-11	153.449	-6.66854	8.84826e-47	9.64614e-46	0.996519
ENSMUSG00000002326	Gmpr2	5.56187	5.05151	6.14659	5.52941	5.88779	5.34774	6.06026	6.43239	5.38543	6.0373	5.09935	5.33287	5.48877	5.22986	5.70561	5.69323	4.56992	5.17306	5.01598	5.84755	5.54611	5.75548	6.91062	6.8259	6.99747	5.74403	5.307	5.5429	4.91965	5.71638	6.91133	81.4036	-0.377904	0.129285	0.31769	51.436	0.654133	0.0481063	0.103126	104.658	-0.347361	0.137616	0.197104	187.875	-1.8949	9.24867e-24	5.30762e-23	41.8261
ENSMUSG00000002329	Mdp1	4.08815	4.95468	4.42092	2.94954	5.4546	4.2741	4.50528	4.18562	4.84901	4.72582	5.07277	4.9263	5.01936	5.01968	4.93024	4.93929	5.1429	4.93574	4.83614	4.54715	4.8156	4.89753	5.60681	5.75663	5.75926	4.44077	5.00614	4.96307	4.9716	4.75343	5.70757	66.9746	0.0455577	0.851415	0.936452	57.6079	0.223197	0.412361	0.554807	73.5947	0.597475	0.0168935	0.0299888	99.4513	-0.665796	0.00131193	0.00251789	39.1034
ENSMUSG00000002332	Dhrs1	5.99633	5.94663	6.48789	6.32287	5.76089	5.51741	5.63903	5.73132	5.78913	5.67192	6.72383	6.56176	6.55465	6.13738	6.41721	6.12037	6.60292	6.25886	6.14144	8.00791	7.91324	8.22617	6.76567	6.9099	6.61238	5.88634	6.61341	6.22499	6.33441	8.04911	6.76265	174.952	0.497758	0.00468031	0.0260488	157.871	0.559525	0.00853286	0.023718	554.855	-1.64613	4.29843e-26	3.77337e-25	225.026	0.104089	0.544427	0.606833	89.728
ENSMUSG00000002341	Ncan	8.86634	8.56955	8.4796	8.78646	8.53439	8.13843	8.33701	8.32941	8.24919	8.38441	8.53947	8.29923	8.43612	8.57719	8.30065	8.36736	6.35811	6.78382	6.39708	10.2915	10.4242	10.3975	6.0773	6.61246	6.4398	8.46748	8.42494	8.41507	6.513	10.3711	6.37652	731.213	-0.00395553	0.974587	0.99112	372.474	2.89965	6.62294e-41	3.50816e-39	2739.35	-2.25024	5.9959e-72	2.02275e-70	454.151	3.32153	6.81782e-62	1.07941e-60	255.506
ENSMUSG00000002342	Tmem161a	3.37184	3.84465	2.15785	3.44842	2.70434	4.51834	3.42705	2.6212	3.2197	3.53355	4.14745	3.71999	3.71094	3.87085	3.55591	3.1036	4.18253	3.41329	3.3205	4.13595	4.26302	4.80544	3.80797	4.21674	4.38911	3.28469	3.85946	3.51012	3.63877	4.40147	4.13794	27.3194	0.457061	0.256042	0.491931	25.3143	0.52065	0.270224	0.405817	51.7514	-0.571517	0.0933628	0.139958	37.599	-0.104605	0.77025	0.809564	14.6271
ENSMUSG00000002343	Armc6	5.51642	4.81397	4.22796	2.94265	4.27937	4.11635	4.79083	5.27207	4.66017	4.93343	5.71774	5.58373	5.39805	5.28597	5.3984	5.45322	5.37912	5.03604	4.57504	4.65305	4.81304	4.7396	4.50608	3.91234	4.40502	4.55532	5.5665	5.3792	4.99673	4.73523	4.27448	108.525	0.262524	0.202945	0.425837	81.9398	0.940581	0.00157851	0.00533402	105.337	1.436	4.00242e-10	1.60648e-09	81.6974	2.15804	6.94576e-14	2.68573e-13	50.7279
ENSMUSG00000002345	Borcs8	3.48541	4.17901	5.05088	4.15239	3.76547	3.09806	2.91472	2.99861	3.0263	3.30304	3.91846	4.06279	3.81466	3.84384	3.62199	4.23616	3.71394	4.48026	3.81767	4.41406	4.57438	4.87072	4.46142	4.52967	4.49048	3.59739	3.93197	3.90066	4.00396	4.61972	4.49385	30.5427	0.0661446	0.85735	0.939433	27.7675	-0.0928466	0.827044	0.885764	53.8384	-0.766078	0.0092699	0.017308	41.832	-0.498949	0.0955211	0.133981	19.2301
ENSMUSG00000002346	Slc25a42	4.79833	4.9025	4.34284	5.13154	4.47194	5.22035	3.68022	3.59509	3.83672	3.80524	4.5444	4.19828	4.21551	3.76392	4.27547	3.71069	4.42823	4.04139	4.11987	4.27978	4.30871	4.8618	2.82115	3.43129	2.94636	4.37848	4.31939	3.91669	4.1965	4.48343	3.06627	35.868	0.515563	0.146176	0.344657	34.698	0.39138	0.283844	0.420715	56.2108	-0.0246292	0.937949	0.95467	29.0134	2.33345	2.5478e-07	6.8596e-07	19.6602
ENSMUSG00000002365	Snx9	4.26792	3.93612	3.15599	4.87383	5.06662	4.13218	5.03652	5.04873	4.96998	4.93398	3.62792	3.76142	3.97504	3.48055	3.99378	3.2503	3.23124	3.62642	3.59411	4.81724	4.93355	4.51754	6.51658	6.32258	6.07904	4.54219	3.78813	3.57488	3.48392	4.75611	6.30607	20.0492	0.204123	0.654156	0.823885	16.1247	0.61622	0.219352	0.346582	47.4478	-1.21424	0.000128697	0.000317908	128.533	-3.24343	5.88129e-37	4.9972e-36	9.83947
ENSMUSG00000002372	Ranbp3	5.71234	6.25983	5.95386	6.36199	6.09622	6.39641	6.06035	6.25127	5.8067	5.99264	6.99788	6.92327	6.9048	6.97414	6.9063	6.51092	6.87218	6.74979	6.86433	6.76465	6.79746	6.70355	7.14826	6.99841	7.00797	6.08916	6.94198	6.79712	6.82877	6.75522	7.05155	257.452	0.138273	0.380234	0.620014	221.789	0.322407	0.0448311	0.0974141	302.1	0.504806	0.000608322	0.00137667	291.007	0.163403	0.259276	0.320143	144.236
ENSMUSG00000002379	Ndufa11	5.82253	5.82773	5.35508	5.49771	5.49631	5.24051	5.53154	4.81135	5.69478	5.74272	6.88194	6.85418	6.54824	6.60717	6.70192	6.2462	7.47237	7.4863	6.89938	6.99162	7.38491	7.60118	6.5164	6.3334	6.18145	5.50203	6.76145	6.51843	7.28602	7.3259	6.34375	222.471	0.289619	0.103483	0.273709	275.71	-0.559273	0.017982	0.0451061	390.1	-0.515462	0.0136031	0.0246216	214.566	0.890651	6.22844e-06	1.50463e-05	176.5
ENSMUSG00000002384	Bmp8b	0	0	0	0	0	0	0	0	0	0	0	0	0	0	0	0	0	0	0	0	0	0	0	0	0	NA	NA	NA	NA	NA	NA	NA	NA	NA	NA	NA	NA	NA	NA	NA	NA	NA	NA	NA	NA	NA	NA	NA
ENSMUSG00000002393	Nr2f6	3.05505	3.30516	2.64756	2.10497	3.7058	4.3761	3.29653	2.94911	3.61293	3.736	3.32444	2.97899	2.76699	3.15466	2.77092	3.2073	4.04638	3.83783	3.27992	3.28766	3.31148	3.60558	3.36999	3.42909	3.72319	3.27892	3.02347	3.04429	3.72138	3.40157	3.50742	14.7996	0.0314333	0.951711	0.981044	19.892	-0.954767	0.0526433	0.11132	21.7004	-0.333047	0.443886	0.52973	19.6636	-0.433728	0.337488	0.403568	13.9167
ENSMUSG00000002395	Use1	3.70294	5.00184	3.41449	4.8999	4.4926	5.67083	4.27315	3.8982	4.48743	4.51456	4.75835	4.92989	4.8126	5.02488	4.68753	4.71534	5.19007	5.43267	5.72404	5.34408	5.52902	5.8751	5.97332	5.7923	6.20374	4.43559	4.83362	4.80925	5.44893	5.58273	5.98979	54.5748	0.0136393	0.960345	0.985683	66.1536	-0.759346	0.0055343	0.0162283	99.2305	-0.83286	0.000734554	0.00164571	107.605	-1.30155	6.54885e-09	1.95497e-08	45.6784
ENSMUSG00000002396	Ocel1	1.51006	1.74057	1.11427	2.98256	3.68736	3.10269	2.05287	1.43719	1.67236	2.12398	1.53696	2.00596	2.08871	2.56829	1.46776	1.24731	1.47441	1.41432	1.50107	1.15359	2.05084	1.97327	1.73135	2.46316	2.72904	2.14239	1.87721	1.76112	1.46327	1.7259	2.30785	7.4228	-0.102884	0.894143	0.957516	4.71873	1.18337	0.211856	0.338095	8.17184	0.447492	0.5347	0.61483	10.1855	-0.585702	0.367249	0.433907	3.33041
ENSMUSG00000002409	Dyrk1b	4.86348	5.17315	4.69111	3.3317	4.85569	5.22813	4.35017	5.26403	4.45573	4.61802	4.43596	4.26593	4.3342	4.42658	4.24923	4.14923	4.08322	4.23716	3.95954	4.10517	4.18142	4.14047	3.4915	3.85741	4.09591	4.68312	4.34536	4.27501	4.09331	4.14235	3.81494	39.476	0.0749809	0.810632	0.914074	30.9997	0.51699	0.152924	0.262742	44.4999	0.558631	0.0604168	0.0954233	33.7076	1.10037	0.00243827	0.0045167	20.6385
ENSMUSG00000002413	Braf	7.65662	7.5749	7.5587	7.58138	7.99993	7.75355	7.75591	8.00983	7.6898	7.58903	7.79134	7.73506	7.80573	8.13797	8.13973	8.22242	7.63296	7.66591	7.8034	6.97843	6.91275	6.64802	6.56749	6.65255	6.57913	7.71697	7.77737	8.1667	7.70075	6.8464	6.59972	571.717	-0.533578	6.30151e-07	9.33598e-06	387.136	0.253986	0.0657104	0.133891	408.771	1.54345	5.75389e-21	4.10439e-20	330.481	1.98366	1.19569e-41	1.14156e-40	331.966
ENSMUSG00000002416	Ndufb2	3.00561	4.83987	4.50152	5.20497	3.96366	4.81497	4.80052	3.92605	4.63067	4.48108	5.36039	5.15174	5.32128	5.54881	4.98639	4.86515	6.50555	6.11399	6.34648	5.88401	5.74107	5.82738	4.84247	4.92858	4.8186	4.41689	5.2778	5.13345	6.32201	5.81749	4.86322	79.3084	0.120324	0.638772	0.814863	127.917	-1.24841	1.40482e-08	1.10971e-07	130.263	-0.497959	0.011624	0.0212896	71.9689	0.90418	0.000255445	0.000531506	86.5234
ENSMUSG00000002428	Hltf	6.87521	6.22145	5.73108	6.92244	6.38506	6.74566	6.79027	6.7971	6.52941	6.4528	5.64537	5.5957	5.84292	5.7545	5.92316	6.31437	5.35447	5.0827	5.03472	4.80072	5.03623	5.11316	7.24157	6.91327	7.22826	6.54505	5.69466	5.99734	5.1573	4.98337	7.1277	110.801	-0.455731	0.0377986	0.132335	63.3744	0.997004	0.000412728	0.00158638	84.6225	1.30929	1.52865e-07	5.08347e-07	217.635	-1.66763	6.45097e-19	3.10961e-18	54.8095
ENSMUSG00000002455	Prpf6	6.85041	6.5563	6.85686	6.31301	6.38215	6.37775	6.4561	5.92345	6.04217	6.34791	7.06605	7.05938	6.85349	6.96568	6.96389	7.06337	6.66892	6.32672	6.54498	6.27003	6.12454	6.46437	7.10867	6.82271	6.81479	6.41061	6.99297	6.99765	6.51354	6.28631	6.91539	284.203	-0.00281728	0.984113	0.99431	200.465	0.844437	2.03574e-05	0.000101476	262.979	1.22339	1.26572e-11	5.61595e-11	280.05	0.415852	0.0165445	0.0269966	139.095
ENSMUSG00000002458	Rgs19	2.67543	3.16021	2.09437	2.24494	3.11234	2.96092	3.6034	1.65757	4.09714	2.37435	4.34	4.32094	4.21166	4.6879	4.5376	4.19634	3.4925	2.64826	2.19576	3.07931	3.65146	3.89502	6.91865	6.94446	7.06288	2.79807	4.29087	4.47395	2.77884	3.54193	6.97533	50.5666	-0.310321	0.269363	0.507292	24.887	2.46246	2.78092e-06	1.58231e-05	42.1237	1.24198	0.000328394	0.000768308	250.764	-3.11746	3.21329e-73	6.50628e-72	20.1981
ENSMUSG00000002459	Rgs20	4.51121	4.99521	3.92003	5.59514	5.64882	4.77981	5.34115	4.6624	4.70867	5.07214	5.16473	5.18685	5.12247	3.68151	3.52326	3.44432	2.71422	3.50845	3.33002	6.98686	7.01782	7.14415	3.20029	3.58217	3.70538	4.92346	5.15802	3.5497	3.18423	7.04961	3.49594	48.703	2.38195	3.57192e-12	1.0317e-10	40.9801	3.00851	4.19507e-12	4.88683e-11	300.508	-2.20835	2.92464e-44	4.77535e-43	53.0005	2.78459	1.26802e-15	5.28161e-15	7.57539
ENSMUSG00000002475	Abhd3	6.93219	6.90431	5.58675	7.71301	7.55989	6.60537	7.14804	7.45336	7.18507	7.27157	5.3713	5.33426	5.18021	5.13782	5.10887	5.31004	8.21269	8.44928	8.44271	9.54398	9.62799	9.69314	5.94492	6.12532	6.14905	7.03596	5.29526	5.18557	8.36822	9.6217	6.0731	41.3608	0.228897	0.45893	0.68891	387.283	-4.19054	8.26404e-116	2.82933e-113	1501.11	-5.65527	3.02006e-281	1.00636e-278	72.2487	-0.90753	0.000185628	0.00039251	268.589
ENSMUSG00000002477	Snrpd1	5.53952	6.2766	5.55403	5.73699	5.40727	5.7485	6.0878	5.83471	5.69382	5.85385	5.83528	6.07458	6.24205	6.12544	6.29914	6.5401	6.32021	6.43362	6.68942	6.33201	6.23081	6.03156	6.01325	5.94154	5.96967	5.77331	6.05063	6.32156	6.48108	6.19813	5.97482	155.981	-0.385042	0.0489835	0.160547	143.372	-0.451201	0.0488005	0.104248	172.994	0.0423889	0.840103	0.88072	132.668	0.425176	0.0409554	0.0622091	112.216
ENSMUSG00000002486	Tchp	2.89521	2.87062	2.90395	1.87048	3.5465	3.38326	3.91263	3.75288	3.17523	3.34296	2.70783	2.61907	3.00034	3.00481	2.6207	1.77225	2.84367	2.69241	3.12869	3.04246	2.74664	2.24547	3.02568	3.22595	3.28079	3.16537	2.77575	2.46592	2.88826	2.67819	3.17748	11.2955	0.282828	0.641518	0.816489	11.7278	-0.0470569	0.934704	0.959236	14.8773	0.341955	0.525041	0.606157	16.4772	-0.38575	0.411222	0.478282	7.16817
ENSMUSG00000002489	Tiam1	7.57467	7.46882	7.6337	5.77013	6.9637	7.46933	7.49717	7.05442	7.40684	7.43303	7.36959	7.53198	7.44983	7.39722	7.32349	7.13567	7.98258	7.35331	7.47508	6.11087	6.13058	5.57277	6.42143	6.44712	6.35317	7.22718	7.45047	7.28546	7.60366	5.93807	6.40724	361.987	0.193715	0.148323	0.348131	361.511	-0.0694276	0.753093	0.836217	301.493	2.37795	4.45655e-28	4.2257e-27	283.192	1.77259	2.14927e-29	1.48302e-28	234.274
ENSMUSG00000002496	Tsc2	8.40848	7.80207	7.8341	8.07952	8.17304	8.1604	8.01757	8.22417	8.07911	8.04691	7.89722	7.78389	7.64419	7.70599	7.69411	7.52478	7.75883	7.52854	7.43494	7.8001	7.75628	7.90407	7.75225	7.83776	7.88041	8.08254	7.7751	7.64162	7.5741	7.82015	7.82347	404.745	0.171329	0.199978	0.421599	337.196	0.458242	0.010284	0.0279328	525.25	0.192489	0.186852	0.256509	447.142	0.254051	0.0767826	0.110291	217.364
ENSMUSG00000002500	Rpl3l	-1.94575	-1.96405	-1.89504	-1.87447	-1.90625	-1.91973	-1.8527	-1.95543	-1.97178	-1.97431	-2.04309	-2.0435	-2.03689	-2.01566	-2.04156	-1.98198	-1.80568	-1.88514	-1.99196	-2.03774	-2.03187	-2.04183	-2.01389	-1.8734	-2.01372	-1.92595	-2.04116	-2.01306	-1.89426	-2.03715	-1.967	0	NA	NA	NA	0.611084	-3.2159	0.272584	NA	0	NA	NA	NA	0.201935	-1.6615	0.683878	NA	0.429826
ENSMUSG00000002504	Slc9a3r2	3.47415	3.76177	4.26992	5.3531	4.27182	4.33834	4.37329	3.36042	3.92849	3.97098	3.89425	3.45193	3.73396	2.55779	3.53076	2.70628	5.68594	5.23035	5.08987	3.86744	3.79873	3.66821	2.84742	3.54284	3.81531	4.11023	3.69338	2.93161	5.33539	3.77812	3.40186	17.3825	1.04425	0.0486136	0.159686	60.9054	-2.18112	3.63213e-11	3.84787e-10	29.9274	0.131546	0.72202	0.781663	21.9796	0.689823	0.14355	0.191721	38.3591
ENSMUSG00000002524	Puf60	8.89248	9.6619	8.61849	8.90102	8.44662	9.13985	9.0304	8.47513	8.30964	8.40599	8.35636	8.36499	8.33895	8.24013	8.10451	8.12166	8.19643	8.48556	8.32197	8.58752	8.75663	8.69102	8.63728	8.66147	8.63786	8.78815	8.35344	8.15543	8.33465	8.67839	8.64554	565.962	0.263611	0.0166011	0.0719327	525.841	0.161601	0.260043	0.394107	865.111	-0.200902	0.096115	0.143715	720.786	-0.0900093	0.396555	0.463697	331.246
ENSMUSG00000002546	Golga2	6.42153	6.39582	6.92842	6.35907	6.42679	6.11901	6.50978	5.94098	6.56433	6.48493	6.90786	6.99015	7.0062	6.9398	6.93232	7.02228	6.92575	7.01716	6.96444	6.84598	6.72243	6.8239	7.36993	7.08462	7.22009	6.41507	6.96807	6.9648	6.96911	6.79744	7.22488	265.932	-0.00515137	0.970202	0.989387	227.172	0.14659	0.346338	0.488107	296.389	0.479307	0.00131669	0.00284377	304.293	-0.0447558	0.769974	0.809382	157.445
ENSMUSG00000002550	Uck1	3.30502	2.30551	1.84939	1.96476	3.79181	2.72902	3.43052	3.65027	3.12951	3.49991	3.21707	3.1782	2.51213	2.83284	3.26917	2.14696	2.91422	3.39398	2.89706	3.29621	3.53033	4.18614	3.72524	3.45021	3.50674	2.96557	2.96913	2.74966	3.06842	3.67089	3.56073	14.0597	0.221724	0.696089	0.851467	13.8481	0.00128734	0.998226	0.999223	28.8397	-0.865902	0.0579843	0.0919995	21.8526	-0.534768	0.22775	0.286608	8.67896
ENSMUSG00000002565	Scin	-0.436613	-0.00648802	-0.240883	-0.161488	-0.284175	-0.336186	0.310164	-0.473989	-0.51547	0.252394	-0.415743	-0.441482	-0.568694	-0.00313583	0.0105099	0.767813	-0.454784	0.0906521	-0.535159	0.0430461	0.0785346	0.11286	-0.553238	-0.0169437	-0.229308	-0.189273	-0.475306	0.258396	-0.299764	0.078147	-0.266497	2.97556	-3.58685	0.0126858	0.0581249	0.62788	-1.54929	0.541551	NA	2.05451	-2.69021	0.0722237	0.111304	0.831217	-1.38081	0.510631	0.57535	2.04251
ENSMUSG00000002578	Ikzf4	2.00702	2.82371	1.21685	1.31954	3.93955	4.42766	2.54026	1.52125	2.59251	2.69898	2.57838	2.50694	2.42545	2.7533	2.19907	1.3177	1.96143	2.4328	2.03855	1.73581	1.92494	1.4974	1.39409	1.35939	0.672238	2.50873	2.50359	2.09002	2.14426	1.71938	1.14191	11.714	0.371855	0.533004	0.742703	9.72519	0.666	0.28969	0.427364	11.5825	1.68263	0.0053453	0.0104188	8.46581	3.18726	0.000456371	0.000923707	5.59435
ENSMUSG00000002580	Mien1	4.29529	4.83708	4.10486	6.1764	5.00791	5.28077	4.91128	5.39285	4.79721	4.92086	6.08207	6.14982	6.19659	6.11599	5.76374	5.63047	5.92591	6.29921	6.43579	6.43081	6.59045	6.94512	6.28377	6.14341	6.2694	4.97245	6.14283	5.83673	6.2203	6.65546	6.23219	139.999	0.367785	0.0567951	0.179267	141.905	-0.00462786	0.982405	0.989666	245.574	-0.468097	0.0165719	0.0294789	168.187	0.185971	0.271447	0.333367	86.5831
ENSMUSG00000002588	Pon1	-1.94518	-1.96543	-1.88907	-1.8663	-1.90148	-1.91639	-1.84221	-1.9559	-1.97399	-1.65637	-2.05351	-2.05402	-2.04604	-2.02255	-2.05163	-1.98527	-1.95039	-2.03832	-1.83611	-2.04698	-2.04049	-2.05195	-2.02058	-2.02533	-2.0204	-1.89123	-2.05119	-2.01981	-1.94161	-2.04648	-2.0221	0	NA	NA	NA	0.258767	-2.42309	0.551185	NA	0	NA	NA	NA	0	NA	NA	NA	0.179654
ENSMUSG00000002602	Axl	5.71394	5.59585	6.33125	6.75748	6.40178	6.10116	5.55587	6.04161	5.73189	5.44634	2.99879	2.94604	3.04113	2.41774	2.231	2.3084	2.94425	2.86404	3.52022	8.34274	8.56784	8.52243	6.99275	6.55542	6.51371	5.96772	2.99532	2.31905	3.1095	8.47767	6.68729	3.3863	2.74324	0.0371625	0.130483	5.32804	0.0177909	0.983014	0.990128	737.316	-7.56199	9.07053e-131	8.0931e-129	136.861	-5.30628	1.92848e-50	2.29972e-49	2.0673
ENSMUSG00000002603	Tgfb1	3.31023	3.4723	3.30132	5.5527	2.29009	2.98282	1.35394	2.99793	2.33191	0.972451	1.35152	0.550933	0.979358	0.659743	0.46102	0.913504	2.85215	3.19588	3.61125	2.46115	2.8957	2.22305	7.98323	8.55049	8.35134	2.85657	0.960605	0.678089	3.21976	2.52664	8.29502	0.66374	2.33728	0.317948	NA	8.90846	-3.81257	1.04707e-05	5.46584e-05	6.46068	-2.6787	0.00310385	0.00629326	525.864	-9.45392	1.2945e-54	1.7311e-53	5.7979
ENSMUSG00000002608	Ccdc97	4.83239	5.39765	3.10794	4.46139	5.6302	5.24935	4.41659	4.47364	5.2904	5.03632	5.74705	5.56279	5.48045	5.39431	5.43487	5.08275	5.88794	5.625	5.69626	5.45687	5.61902	5.80181	6.71825	6.73071	6.79901	4.78959	5.59676	5.30398	5.7364	5.6259	6.74932	90.7349	0.368593	0.101634	0.270634	94.3296	-0.00586211	0.979957	0.987914	125.385	0.206653	0.333815	0.418435	194.657	-1.21887	1.02525e-12	3.76561e-12	57.6311
ENSMUSG00000002617	Zfp40	5.37729	5.72078	5.68028	5.91884	5.01331	5.58326	5.92755	5.97615	5.75305	5.50201	4.27845	4.65337	4.7269	4.54703	4.78622	4.71016	3.15294	3.46365	3.54048	4.44863	4.36275	4.12776	4.40259	4.65845	4.28991	5.64525	4.55291	4.68114	3.38569	4.31305	4.45032	46.8038	-0.199224	0.508852	0.725804	24.199	2.07872	2.67383e-05	0.00013073	47.1192	0.618812	0.0528737	0.0846062	42.5616	0.464147	0.158795	0.209138	18.4314
ENSMUSG00000002625	Akap8l	7.43148	6.70861	7.2476	6.82782	6.5527	6.22974	6.69499	6.98436	6.59286	6.65633	5.71887	5.77929	5.58217	5.76754	5.87278	5.15744	4.29069	4.51535	4.78746	4.71392	4.34592	4.66199	5.97607	6.03207	5.41961	6.79265	5.69344	5.59925	4.53117	4.57394	5.80925	96.8183	0.0284352	0.90392	0.962543	56.494	1.89507	3.64637e-09	3.08338e-08	81.4428	1.93308	2.23551e-13	1.11081e-12	108.029	0.111502	0.655585	0.708328	37.3432
ENSMUSG00000002633	Shh	1.95435	1.76336	1.08987	2.16644	2.74616	2.85705	1.05868	1.41861	2.22458	2.39115	2.49622	2.05838	1.93715	0.408591	0.704078	0.589708	4.69316	4.98065	5.03494	1.65773	1.55373	1.81163	1.27274	0.892868	1.92576	1.96702	2.16392	0.567459	4.90291	1.67436	1.36379	4.978	4.2482	0.00198518	0.0126934	58.7345	-3.62645	1.22667e-25	3.47854e-24	9.14919	1.1388	0.0832522	0.126439	7.1601	1.70234	0.0374611	0.0572659	38.0881
ENSMUSG00000002635	Pdcd2l	3.02582	4.45151	4.06281	2.69968	4.28084	4.11236	4.67991	4.62613	4.61287	4.5308	4.58063	4.67024	4.38908	4.9561	4.37171	4.37888	4.95331	4.48285	4.02894	4.46823	4.05931	4.39584	4.90229	4.7579	4.86302	4.10827	4.54665	4.5689	4.48836	4.30779	4.84107	51.4309	-0.0824163	0.783252	0.899143	42.737	0.224316	0.541794	0.671004	54.0522	0.596551	0.0410265	0.067318	58.5359	-0.0916083	0.727813	0.773164	30.5165
ENSMUSG00000002658	Gtf2f1	5.75926	6.56226	4.28496	5.29208	5.65508	6.29519	6.21988	6.01831	5.81569	6.21678	6.41669	6.58225	6.5172	6.68674	6.47026	6.27398	6.08833	6.21087	6.08874	5.95282	5.99995	5.87904	6.61638	6.29959	6.28574	5.81195	6.50538	6.47699	6.12931	5.94394	6.40057	202.038	-0.00294494	0.985913	0.99431	148.877	0.664151	0.000503903	0.00190223	196.893	1.03111	3.46222e-09	1.30392e-08	198.99	0.442685	0.0159921	0.0261631	102.13
ENSMUSG00000002660	Clpp	4.8744	5.52399	4.52412	5.22036	5.26826	5.66238	4.63835	5.28434	5.02017	5.0976	4.37856	4.76499	4.62705	4.88579	4.92449	4.40629	5.39231	5.61436	5.01871	5.78485	5.74186	6.16136	4.9339	4.96712	4.93615	5.1114	4.5902	4.73886	5.3418	5.89602	4.94572	45.0453	-0.29099	0.350344	0.592095	54.7335	-0.974362	0.00284643	0.00900503	109.04	-1.62041	1.48313e-10	6.11682e-10	49.9356	-0.199689	0.489909	0.555698	40.4033
ENSMUSG00000002661	Alkbh7	5.01615	4.20102	3.65831	4.94186	4.65027	4.68553	4.67693	4.22395	4.50435	5.18701	4.65	4.6149	4.33332	4.25608	4.50941	3.36214	5.49854	5.44151	4.60649	5.12601	5.08487	5.4257	4.79507	4.52437	4.64126	4.57454	4.53274	4.04254	5.18218	5.2122	4.65357	37.094	0.52664	0.152256	0.354382	56.9294	-0.838804	0.0191268	0.0476202	77.5002	-0.715343	0.0051743	0.0101144	48.3318	0.155755	0.596979	0.655757	34.7687
ENSMUSG00000002664	Pspn	0	0	0	0	0	0	0	0	0	0	0	0	0	0	0	0	0	0	0	0	0	0	0	0	0	NA	NA	NA	NA	NA	NA	NA	NA	NA	NA	NA	NA	NA	NA	NA	NA	NA	NA	NA	NA	NA	NA	NA
ENSMUSG00000002668	Dennd1c	-0.328779	-0.467011	0.0542821	0.209665	1.7833	-0.132234	0.677243	-0.401927	-0.525389	-0.544512	-1.17916	-0.295443	-0.230163	-0.817716	-0.989681	-0.602428	-0.364341	-0.906714	-0.669913	-0.955324	-0.918908	-1.01732	5.80801	6.55878	7.235	0.0324643	-0.568254	-0.803275	-0.64699	-0.963851	6.53393	0.344625	1.37273	0.665855	NA	0.310896	1.0903	0.764053	NA	0.448888	2.14024	0.478458	NA	75.4649	-7.64842	3.37068e-18	1.57562e-17	0
ENSMUSG00000002679	Med6	4.55998	4.80831	5.476	4.84137	5.46484	4.57175	4.93754	5.33646	5.03448	4.82663	5.55427	5.40682	5.31002	5.4224	5.72807	5.83739	5.79587	5.53107	5.18503	5.45465	5.46773	5.15907	5.58042	5.30619	5.31646	4.98574	5.4237	5.66262	5.50399	5.36049	5.40102	102.967	-0.344417	0.107661	0.280884	81.1317	0.0458739	0.86474	0.911237	105.45	0.341349	0.132494	0.190688	91.26	0.346656	0.132676	0.178942	64.0513
ENSMUSG00000002688	Prkd1	5.11508	3.97886	5.02426	3.83188	3.45163	3.29473	4.7665	4.76232	4.21904	4.44658	2.94644	2.43102	2.8176	2.96715	3.32931	2.81148	3.16721	3.0631	2.70334	5.65544	5.60548	5.92208	2.29643	3.28093	2.7634	4.28909	2.73169	3.03598	2.97789	5.72767	2.78025	10.5093	-0.584519	0.33167	0.574146	8.45163	-0.216448	0.74804	0.832625	102.136	-4.13266	5.01345e-38	6.68242e-37	9.24315	0.147582	0.826888	0.858553	6.99958
ENSMUSG00000002699	Lcp2	0.55955	1.20049	0.9483	1.11823	0.856803	3.21307	0.151291	1.80672	0.355542	0.335497	1.52134	1.75663	0.435656	1.403	1.06274	0.274644	0.523001	0.506787	0.19519	1.57196	1.44638	1.60887	9.5085	9.0896	9.24055	1.05455	1.23788	0.913461	0.408326	1.54241	9.27955	3.19688	0.71863	0.527936	0.738791	1.98392	2.76534	0.101199	0.189127	5.3451	0.0349369	0.966929	0.975954	571.33	-7.77627	7.56422e-111	3.12754e-109	0.82709
ENSMUSG00000002718	Cse1l	7.64071	7.36625	8.10598	7.29531	7.04044	7.23761	7.36589	7.37666	7.1553	7.01745	8.50669	8.67154	8.72681	8.23705	8.44132	8.6565	8.55173	8.73953	9.04853	8.30259	8.13718	7.9735	8.47607	8.32454	8.44138	7.36016	8.63501	8.44496	8.77993	8.13776	8.414	855.35	0.232152	0.0769825	0.225266	848.664	-0.0581895	0.749819	0.833944	921.425	0.907128	6.51002e-09	2.40815e-08	863.255	0.60595	1.8686e-06	4.71127e-06	545.162
ENSMUSG00000002728	Naa20	4.05431	5.03347	3.83175	6.04916	5.0009	5.28114	4.20083	4.52876	4.79329	4.36197	5.6588	5.63949	5.32545	5.03482	5.14689	5.50758	5.55872	5.80757	5.65338	5.12822	4.7054	4.97495	4.97088	5.17572	5.45212	4.71356	5.54125	5.22976	5.67323	4.93619	5.19957	94.1742	0.452924	0.0518058	0.167423	97.6959	-0.0289783	0.903248	0.937815	102.645	1.10615	6.44127e-06	1.83901e-05	96.0952	0.790774	0.00150578	0.00286723	59.3551
ENSMUSG00000002731	Prkra	3.45704	4.26943	3.73376	3.55386	4.45916	3.47434	4.18327	3.71315	3.78787	4.13978	4.83358	4.5947	4.64264	5.54408	4.90483	4.81229	6.29601	5.8409	5.78199	6.16061	6.07806	5.87087	6.31809	5.81533	5.97817	3.87717	4.69031	5.08707	5.97297	6.03651	6.0372	62.5746	-0.652365	0.0231144	0.0922784	91.0421	-1.61099	1.29001e-09	1.15484e-08	129.132	-1.60744	1.77692e-13	8.88896e-13	109.456	-1.56326	1.37095e-10	4.50822e-10	71.8132
ENSMUSG00000002732	Fkbp7	2.73039	2.23963	4.05282	4.10538	4.23388	2.05068	2.47301	3.11119	2.92646	2.69844	2.68903	2.56677	3.05404	3.74093	3.63705	3.82396	3.51193	3.81607	4.20981	4.79186	4.76874	4.8948	6.26125	6.21715	6.4792	3.06219	2.76995	3.73398	3.84594	4.81847	6.3192	17.6733	-1.58668	0.000850099	0.00615839	16.3202	-1.66335	0.00144713	0.00492481	47.0701	-2.88442	3.72001e-16	2.13949e-15	142.118	-4.8327	1.58872e-57	2.27934e-56	16.6819
ENSMUSG00000002733	Plekha3	3.4026	4.74935	2.45796	4.77652	4.35709	4.52304	4.11255	3.29598	4.64253	4.05773	3.95984	3.66496	3.66076	4.34083	4.11754	3.53705	4.6897	4.71587	4.3251	4.51173	4.66996	4.71064	4.42591	4.24271	4.76077	4.03754	3.76185	3.99847	4.57689	4.63078	4.47646	27.5159	-0.479113	0.21893	0.447067	32.8759	-1.07443	0.00316574	0.0099014	46.6958	-1.04236	0.000597841	0.00135464	36.0208	-0.780251	0.0256901	0.0405304	25.3956
ENSMUSG00000002741	Ykt6	6.66966	6.42472	6.22755	4.34563	6.02092	6.55766	6.43312	6.5985	6.29825	6.22779	6.56901	6.5385	6.54301	6.42111	6.31996	6.0854	6.27656	6.0493	5.85523	6.75588	6.73426	6.91777	7.6462	7.75999	8.02923	6.18038	6.55017	6.27549	6.06036	6.80264	7.81181	169.559	0.339519	0.0450674	0.151655	134.432	0.862768	3.10447e-05	0.000150215	257.364	-0.103367	0.505042	0.58747	387.949	-1.37879	3.648e-18	1.70424e-17	79.6673
ENSMUSG00000002748	Baz1b	8.02524	8.00234	8.73081	8.41922	8.10803	7.84222	7.8234	7.75852	7.8673	7.5054	8.07721	7.97382	8.02282	7.9445	8.03053	7.85248	7.44	7.37485	7.22242	7.34894	7.24065	7.37856	8.37794	8.05895	8.19341	8.00825	8.02461	7.9425	7.34575	7.32272	8.2101	525.802	0.0854944	0.457205	0.686936	359.798	1.10895	1.25343e-13	1.64433e-12	505.273	1.22474	1.45062e-19	9.7232e-19	603.544	0.0516698	0.718289	0.764851	236.842
ENSMUSG00000002763	Pex6	5.69685	5.37254	5.75382	5.26697	5.41234	5.45282	5.58601	6.12368	5.26272	5.65038	4.63236	4.42426	4.55445	4.62861	4.23853	4.49665	4.52833	3.98604	3.93337	4.49542	4.15897	5.04038	4.65231	4.78213	4.04247	5.55781	4.53702	4.4546	4.14924	4.56493	4.4923	40.1627	0.118778	0.708173	0.857297	30.1831	0.809553	0.0398387	0.0883578	51.9475	0.109687	0.748902	0.805327	42.3561	0.314438	0.357776	0.424081	19.9363
ENSMUSG00000002767	Mrpl2	5.60303	5.66631	4.31269	4.76432	4.39365	5.55688	5.23163	5.26728	4.75531	5.31448	5.76131	5.79476	5.6021	6.00936	5.78475	5.72117	6.0397	5.87096	5.91193	6.09887	6.23205	5.89712	5.90777	5.98286	6.16112	5.08656	5.71939	5.83843	5.94086	6.07602	6.01725	117.421	-0.183378	0.351612	0.59349	104.753	-0.125034	0.557575	0.684179	156.934	-0.241277	0.225029	0.299379	128.86	-0.0942697	0.630009	0.686249	77.0778
ENSMUSG00000002768	Mea1	5.58721	5.61134	5.05719	5.32022	5.23556	5.30403	4.56264	4.91034	4.7073	5.03805	5.94934	6.04839	5.99161	6.18932	5.9834	6.0671	6.46103	6.00059	6.0706	6.39402	6.30109	6.49131	6.41234	6.49708	6.50902	5.13339	5.99645	6.07994	6.17741	6.39547	6.47281	141.974	-0.127301	0.473624	0.701073	127.57	-0.0769294	0.727776	0.819032	196.828	-0.300023	0.0754618	0.11577	173.289	-0.336199	0.0405764	0.0617047	92.2836
ENSMUSG00000002769	Gnmt	-0.708338	-0.774208	-0.525805	-0.451763	-0.0450768	-0.614682	0.514716	-0.235476	-0.802026	-0.334212	-0.893694	-0.598122	-0.875585	-0.271731	-0.61804	-0.83444	-0.20806	0.106416	-0.418595	-0.876075	-0.184563	-0.632249	-0.860681	-0.863704	-0.860562	-0.397687	-0.789134	-0.574737	-0.173413	-0.564296	-0.861649	0.795871	-1.68552	0.454658	NA	1.63666	-3.03059	0.0846999	0.163697	0.991609	-1.51993	0.481935	0.565396	0.196036	0.923056	0.819666	NA	1.41779
ENSMUSG00000002771	Grin2d	3.83216	3.39252	3.8986	3.75827	2.32292	4.59062	3.67834	3.39154	3.97658	4.10044	1.42471	1.33671	1.26808	1.70671	1.2265	2.26841	4.38808	4.49259	3.69923	2.49318	2.87502	2.54207	1.95167	2.25416	2.44049	3.6942	1.34317	1.73387	4.1933	2.63676	2.21544	2.46665	-1.05534	0.398002	0.635684	24.4062	-5.10073	2.55021e-13	3.25135e-12	7.03406	-2.6073	0.00166761	0.00353895	3.77373	-1.77879	0.0743044	0.107043	17.6898
ENSMUSG00000002778	Kdelr1	5.93543	6.01861	6.11158	5.94215	6.12621	6.2493	5.81865	6.05485	5.81124	6.00037	6.60192	6.8704	6.60606	6.57252	6.71554	6.5994	6.81117	7.07077	7.08887	7.45875	7.6009	7.83289	7.42997	7.58324	7.52483	6.00684	6.69279	6.62916	6.99027	7.63085	7.51268	204.727	0.0813402	0.624794	0.805918	208.148	-0.259983	0.182103	0.300486	414.109	-1.00969	1.25612e-08	4.55169e-08	324.082	-0.778959	9.55056e-07	2.45994e-06	140.335
ENSMUSG00000002781	Tmem143	4.53335	4.13574	5.12772	4.20202	4.66712	4.60232	4.54936	4.6794	4.76948	4.69005	4.87201	4.93988	4.74998	4.483	4.29405	3.99949	5.19143	4.86405	4.58333	4.86138	5.36919	5.39343	4.62673	4.88721	4.76305	4.59566	4.85396	4.25885	4.8796	5.208	4.759	47.0715	0.833917	0.00582511	0.0311898	53.3264	0.132369	0.661814	0.770753	87.7422	-0.278983	0.276244	0.356478	59.4889	0.453794	0.0848682	0.120738	28.4567
ENSMUSG00000002791	Pdxk-ps	-2.05976	-2.08856	-1.97994	-1.71971	-1.9976	-2.01881	-2.14116	-2.075	-2.10072	-2.10471	-2.22653	-2.22773	-2.20321	-2.16979	-2.2133	-2.11678	-2.06717	-2.19223	-1.90463	-2.20455	-2.19531	-2.22038	-1.93914	-2.17375	-2.16674	-2.0286	-2.21916	-2.16662	-2.05468	-2.20675	-2.09321	0	NA	NA	NA	0.258767	-2.42309	0.551185	NA	0	NA	NA	NA	0.216226	-1.6615	0.683878	NA	0.179654
ENSMUSG00000002797	Ggct	4.23362	4.49878	3.52078	4.50409	3.91419	4.36155	5.0163	5.49729	4.9957	4.99265	4.10453	4.13296	4.07954	4.88787	4.97203	5.06147	3.97168	4.58544	4.6468	4.129	3.6827	3.99905	3.40799	3.57022	3.68537	4.5535	4.10568	4.97379	4.40131	3.93692	3.55453	54.593	-1.27376	2.12414e-06	2.87844e-05	32.5333	-0.398502	0.268899	0.404256	35.4582	0.485147	0.151725	0.2149	25.7322	1.20885	0.00220718	0.00411232	36.5821
ENSMUSG00000002799	Jag2	3.6812	4.66834	5.70882	4.40712	4.85257	3.42635	4.73138	4.26385	4.36202	4.15184	4.08613	4.04412	3.70269	4.42282	4.59848	3.7668	3.62471	3.87076	3.64339	3.30141	3.09928	2.92843	3.90763	4.33035	4.22966	4.42535	3.94431	4.2627	3.71295	3.10971	4.15588	36.7738	-0.585593	0.0943757	0.257601	22.7399	0.520721	0.226796	0.356021	25.6893	1.66335	9.7489e-05	0.00024418	33.8501	0.00938241	0.978676	0.98386	19.9426
ENSMUSG00000002803	Btbd6	5.36489	4.29366	4.76131	5.48202	5.21108	5.51275	5.26379	5.3404	5.17907	5.29586	5.03319	4.79816	4.854	5.23558	5.27164	5.10032	4.93023	4.45623	4.09719	4.51106	4.53817	4.33229	4.47673	5.11194	4.7256	5.17048	4.89512	5.20251	4.49455	4.46051	4.77142	70.1532	-0.464752	0.0535657	0.171374	43.4128	0.758356	0.0340183	0.0775942	59.3173	0.905492	0.00100676	0.00221064	57.924	0.453169	0.129504	0.175084	36.6727
ENSMUSG00000002804	Nudt14	2.73026	3.32313	2.82326	3.46385	2.72234	3.69525	3.88784	3.55638	3.91408	3.9513	3.88451	3.91366	3.39142	3.60272	3.67617	3.45348	3.94237	3.94884	2.71535	3.90748	3.85748	3.80529	4.61399	4.69646	4.86973	3.40677	3.72987	3.57746	3.53552	3.85675	4.72673	25.3779	0.262107	0.512887	0.729174	22.6939	0.316172	0.557341	0.684102	34.962	0.119702	0.731912	0.790701	49.5365	-1.08105	0.000416488	0.000847119	14.2691
ENSMUSG00000002808	Epdr1	6.81678	7.10985	6.92325	7.12868	7.13174	6.86866	6.85106	6.78062	7.01465	6.95657	8.26361	8.44462	8.59304	8.19093	8.16786	8.2957	8.57042	8.94659	9.00366	8.90651	8.93233	8.79845	5.95082	6.10194	5.93538	6.95819	8.43376	8.21816	8.84022	8.8791	5.99605	768.352	0.278506	0.0217196	0.0881277	874.826	-0.386823	0.0340138	0.0775942	1234.11	-0.322914	0.0239888	0.0413961	509.046	3.82917	2.41195e-94	7.37777e-93	559.78
ENSMUSG00000002812	Flii	7.83015	7.36653	7.6851	7.44895	7.43246	7.40408	7.83362	7.88311	7.5759	8.00321	6.70102	6.5341	6.25155	6.11359	6.30466	6.32526	7.1689	7.00835	6.73288	7.12203	6.93148	7.46942	8.15393	7.90745	8.10203	7.64631	6.49556	6.24784	6.97004	7.17431	8.05447	130.002	0.392074	0.0600529	0.187319	161.784	-0.503124	0.0372608	0.083725	254.333	-0.722301	0.00148052	0.00316799	377.963	-1.81392	7.38735e-23	4.10342e-22	101.651
ENSMUSG00000002814	Top3a	4.02772	3.87855	3.25511	2.30549	5.12283	4.64572	3.85481	4.22816	3.48806	4.16465	3.2613	2.89927	2.90354	3.23007	2.75066	3.46623	2.67985	3.38343	2.70822	4.04471	3.7312	3.76534	5.02283	5.21567	5.58714	3.89711	3.02137	3.14899	2.92383	3.84708	5.27522	13.388	-0.18437	0.735088	0.871698	9.89287	0.216609	0.741863	0.827569	24.4998	-1.04907	0.0107756	0.0198335	62.4758	-2.99772	3.19048e-19	1.55747e-18	7.5758
ENSMUSG00000002820	Atg4d	4.17891	3.61369	1.94489	2.8117	3.49619	4.60802	3.50167	3.39726	4.18282	3.72835	2.92112	3.22145	2.89397	2.31588	2.94718	2.95623	3.87886	3.66318	3.57143	3.12556	3.24941	3.05791	2.60916	3.18056	3.09026	3.54635	3.01218	2.73976	3.70449	3.14429	2.95999	12.5893	0.448062	0.427518	0.663071	19.1576	-0.904054	0.0449761	0.0976233	18.5685	0.0639085	0.886575	0.916407	14.4382	0.392416	0.449872	0.516007	12.1535
ENSMUSG00000002825	Qtrt1	2.71575	1.94985	2.50556	2.68635	3.58144	3.72851	2.80451	3.15521	3.3134	3.17985	2.89973	3.23885	3.35443	3.17223	3.27491	2.85368	3.46844	2.87486	2.04153	3.02468	2.62592	2.95833	3.51602	3.41456	3.36887	2.96204	3.16434	3.10027	2.79494	2.86964	3.43315	18.8513	0.0390602	0.931682	0.97453	14.812	0.653313	0.291869	0.429947	20.2353	0.729823	0.106735	0.157355	22.7946	-0.115391	0.777823	0.816205	9.84158
ENSMUSG00000002831	Plin4	1.59485	-0.300578	0.930263	0.198972	0.00903597	-0.071484	0.174673	2.55634	-0.324065	1.47324	-0.574782	-0.594208	-0.0638592	-0.447258	-0.51306	-0.354381	-0.255091	0.287644	-0.383172	1.7153	1.90493	2.17845	-0.442697	0.628393	-0.442268	0.624125	-0.41095	-0.438233	-0.116873	1.9329	-0.0855239	0.170828	-0.0958564	0.981258	NA	0.458937	-1.83686	0.573715	NA	10.9516	-6.06641	2.5807e-06	7.67115e-06	0.797992	-2.13416	0.416419	0.483159	0.21289
ENSMUSG00000002833	Hdgfl2	5.04067	5.84925	6.42048	4.79181	5.46037	6.03018	5.52038	5.3736	5.4404	5.4414	7.08376	7.04619	6.94505	6.95712	6.95281	6.60781	6.52002	6.51636	6.25262	6.41437	6.34754	6.29241	6.55277	6.42321	6.65924	5.53686	7.025	6.83924	6.42967	6.35144	6.54507	297.641	0.202107	0.166931	0.376002	219.502	0.955549	8.1617e-08	5.81553e-07	302.278	1.16041	4.66488e-14	2.41957e-13	274.675	0.955337	8.93998e-10	2.81012e-09	137.19
ENSMUSG00000002835	Chaf1a	1.67373	2.35524	1.3183	2.73984	1.26894	2.29014	2.02388	2.44518	2.27608	0.994943	2.42772	2.12999	2.72478	2.34477	2.29681	2.17389	2.97142	1.99032	2.23566	2.55101	2.42028	2.54745	3.15022	1.97833	2.02065	1.93863	2.4275	2.27182	2.39913	2.50625	2.38307	11.4022	0.266334	0.648835	0.821247	11.132	0.203607	0.760876	0.841538	15.6569	0.111066	0.824412	0.867388	13.5506	0.140245	0.82773	0.859201	6.93189
ENSMUSG00000002844	Adprh	8.10913	7.75876	7.85899	8.02359	8.0079	7.8418	8.10364	8.33446	7.89743	8.13422	7.91083	7.97007	8.08481	7.8972	7.98624	8.04083	8.21077	8.11644	7.90643	8.13788	8.1775	8.17929	8.33507	8.38112	8.43798	8.00699	7.98857	7.97476	8.07788	8.16489	8.38472	497.103	0.00554442	0.962776	0.986532	445.731	0.0322359	0.836712	0.892879	647.397	0.00502706	0.968585	0.977385	611.661	-0.233345	0.0539081	0.0800768	307.497
ENSMUSG00000002845	Tmem39a	2.71016	3.30329	1.20732	3.07863	2.97452	3.02133	1.52633	1.51367	2.70092	1.72616	1.27463	1.65994	1.73479	0.68384	2.25679	0.811102	0.946717	1.48039	2.46459	1.7267	2.1281	2.46479	3.44109	2.99263	3.04965	2.37623	1.55645	1.25058	1.63056	2.10653	3.16112	3.78855	0.0198552	0.985878	0.99431	4.11282	-0.385149	0.714874	0.809707	7.61514	-0.930593	0.197373	0.268649	15.6253	-2.55647	5.24952e-06	1.27617e-05	2.65376
ENSMUSG00000002846	Timmdc1	5.5004	4.83506	2.83947	4.26581	4.60105	5.28201	4.39414	4.79293	4.3959	4.95387	4.81022	4.74491	5.1375	4.79029	4.78765	4.991	5.68135	5.29005	5.30705	5.20512	5.20816	5.40945	4.86361	5.09843	4.86588	4.58606	4.89754	4.85632	5.42615	5.27424	4.94264	59.5488	0.057975	0.830042	0.924545	68.9244	-0.577233	0.0419239	0.0921957	87.4875	-0.297871	0.221095	0.29501	63.065	0.23708	0.384292	0.4512	47.0345
ENSMUSG00000002847	Pla1a	-1.26949	-1.32306	-0.273357	-1.0608	-1.15386	-1.19331	-1.01507	-0.450169	-0.921853	-1.3531	-1.49031	-1.16801	-1.47584	-1.46499	-1.47871	-1.37554	-1.28327	-1.14755	-1.40477	-1.47623	-1.47347	-1.48061	-1.08551	-1.46639	-1.08483	-1.00141	-1.37806	-1.43975	-1.27853	-1.47677	-1.21224	0.173797	0.569037	0.888221	NA	0.309383	-0.615396	0.867271	NA	0.225969	1.33723	0.741176	NA	0.625976	-0.916682	0.715003	NA	0.106445
ENSMUSG00000002870	Mcm2	2.97348	1.93522	2.99026	1.9457	3.44058	1.67377	2.57043	3.0468	3.55594	3.22932	3.26006	3.05579	2.89494	2.83415	3.15129	2.8891	3.26509	2.97873	2.46484	3.39838	2.81249	3.26926	5.14565	4.80064	4.86632	2.73615	3.07026	2.95818	2.90289	3.16004	4.93754	15.5826	0.159975	0.745467	0.87692	13.2388	0.440093	0.43534	0.576509	20.9925	0.0842598	0.847909	0.886512	58.1243	-2.35831	7.64933e-15	3.09053e-14	8.55739
ENSMUSG00000002871	Tpra1	2.92691	2.99317	3.98291	3.66626	3.61594	4.30207	3.12374	3.73143	3.64804	3.89691	4.10089	4.24435	4.11206	4.0065	4.05616	3.80088	4.93606	4.88325	4.65957	4.44504	4.87115	4.8689	5.04661	5.06744	5.2238	3.58874	4.15243	3.95451	4.82629	4.72836	5.11262	32.2963	0.263273	0.445112	0.677424	44.5064	-0.814646	0.00662682	0.0189567	58.3867	-0.604474	0.0320643	0.0538683	61.9573	-1.05502	3.48188e-05	7.88641e-05	28.9041
ENSMUSG00000002881	Nab1	4.46581	4.57895	4.70243	5.22375	4.25863	5.04647	4.03124	4.56566	4.98742	4.2534	4.15051	4.02316	4.09055	4.36086	3.94158	4.45484	4.69766	5.156	5.0248	5.35663	5.46286	5.6879	5.37003	5.43479	5.60098	4.61138	4.08807	4.25243	4.95949	5.50246	5.4686	29.8679	-0.257769	0.480061	0.705983	39.3728	-1.21585	0.000196113	0.000811329	79.4181	-1.83392	8.83145e-13	4.2337e-12	64.8175	-1.71596	4.13257e-11	1.39851e-10	29.2268
ENSMUSG00000002885	Adgre5	2.03771	3.50848	5.52832	4.31932	3.88296	3.52248	3.16679	2.63537	3.69055	3.56852	1.70882	1.30621	1.76051	0.971985	0.815473	1.18181	1.39165	1.82983	1.9628	5.76022	5.81733	5.89952	4.20693	4.88239	4.77648	3.58605	1.59185	0.989755	1.72809	5.82569	4.62193	1.2807	3.26827	0.0790008	NA	2.13229	0.0487256	0.96972	0.980688	117.477	-6.19012	7.26155e-39	9.91359e-38	35.5592	-4.62117	5.47355e-17	2.42887e-16	0.678643
ENSMUSG00000002897	Il17ra	5.6814	5.13061	4.94845	5.3456	4.79903	4.50059	4.19506	4.80563	4.84949	5.20548	5.28602	5.28938	5.37975	4.63498	4.41058	3.74287	3.25599	3.13173	3.24824	5.65274	5.77626	6.10521	7.34492	7.6611	7.63886	4.94613	5.31838	4.26281	3.21199	5.84474	7.5483	57.6767	1.37523	3.23277e-06	4.21046e-05	40.9879	3.73367	5.65307e-14	7.65948e-13	132.067	-0.495486	0.0209947	0.0366226	338.654	-2.61453	2.21415e-55	3.03283e-54	11.543
ENSMUSG00000002900	Lamb1	5.68391	5.68225	7.17719	4.81219	6.39175	6.01577	6.11962	5.54889	6.29517	6.18125	5.222	5.11829	5.11981	6.7804	6.76704	6.73268	6.90597	6.91416	6.96158	4.66896	5.3782	4.2873	4.11705	4.23315	4.23238	5.9908	5.15337	6.76004	6.92724	4.77816	4.1942	170.721	-2.23588	8.75647e-39	1.26187e-36	158.536	-2.28199	3.67356e-35	1.54389e-33	63.397	0.685335	0.0603807	0.0953847	43.0297	1.87005	1.82781e-08	5.3095e-08	178.844
ENSMUSG00000002908	Kcnn1	3.24881	3.16531	3.4944	1.88291	3.36087	3.56628	3.37666	1.97294	3.55879	3.8015	3.31986	3.04863	3.11595	3.2134	2.63093	3.63891	3.32899	3.20119	2.42053	3.00313	2.68157	3.23862	1.82723	1.79479	2.48695	3.14285	3.16148	3.16108	2.98357	2.97444	2.03632	20.5636	-0.0425523	0.926924	0.972735	15.8467	0.371665	0.484627	0.620685	21.6386	0.51526	0.233462	0.308911	13.206	2.39596	0.000231241	0.000483827	11.5445
ENSMUSG00000002910	Arrdc2	1.04584	3.1476	1.27843	2.74416	2.74518	1.85062	2.54515	3.04611	1.79847	3.0192	2.14078	2.44456	1.90535	2.43659	1.00619	1.71049	1.02532	0.731065	1.86777	2.77242	2.84414	2.9812	2.13674	2.78625	2.90282	2.32208	2.16356	1.71776	1.20805	2.86592	2.6086	7.5143	0.667888	0.400996	0.6392	4.87114	2.43347	0.0414307	0.0913263	17.078	-0.878897	0.0663369	0.103492	12.4543	-0.483897	0.399822	0.466928	2.37568
ENSMUSG00000002930	Ppp1r17	1.5036	1.35899	1.90637	2.06699	4.33128	4.26351	4.97425	3.49982	4.18882	4.98317	0.562483	0.491296	0.812922	0.965143	1.4861	2.99713	8.7438	8.76058	10.6664	3.55149	3.26592	3.16291	3.45186	3.45712	3.69696	3.30768	0.622234	1.81612	9.39026	3.32677	3.53531	2.5346	-5.30795	0.16156	0.368625	1290.26	-14.4637	1.2925e-33	5.18366e-32	10.4299	-6.98054	7.12288e-08	2.43923e-07	10.5349	-7.20199	2.47154e-08	7.11908e-08	902.48
ENSMUSG00000002944	Cd36	0.839027	2.44873	1.20037	4.11045	1.12234	1.02693	1.07274	0.768365	0.648853	1.30071	1.11472	1.9586	1.54695	0.89822	1.25646	2.21968	1.54069	2.11748	2.29682	3.29748	2.43237	2.91448	7.29221	7.05492	6.81469	1.45385	1.54009	1.45812	1.98499	2.88144	7.05394	4.40499	0.180053	0.852159	0.936783	4.82363	-0.548982	0.536838	0.666838	12.8046	-1.75393	0.00440878	0.00871613	253.246	-6.58908	2.25652e-75	4.82975e-74	3.31865
ENSMUSG00000002948	Map2k7	0.340417	3.13855	0.614777	2.69511	0.537086	3.76678	2.995	1.00666	3.10406	2.16332	0.436842	1.14849	0.953618	0.553462	0.896376	0.182644	0.319482	-0.00509289	0.723474	0.406656	0.999194	1.04034	0.054101	1.78185	1.37777	2.03618	0.846317	0.544161	0.345954	0.815396	1.07124	2.1186	0.797129	0.55866	0.761277	1.53236	2.13622	0.22068	0.348368	3.27095	0.354464	0.739822	0.797558	3.86034	-0.516488	0.637699	0.6934	0.615659
ENSMUSG00000002949	Timm44	5.23166	5.39814	6.26709	3.86777	4.81962	5.98701	5.35292	5.10198	4.88701	5.29107	5.71713	5.77763	5.60114	5.8148	5.9335	5.67825	5.39696	6.09189	5.85955	5.20274	5.28293	5.39471	5.96234	5.85757	5.97523	5.22043	5.69863	5.80885	5.7828	5.29346	5.93171	116.86	-0.182732	0.348089	0.59022	99.5035	-0.0486888	0.851934	0.902876	112.066	0.82879	7.75884e-05	0.000196963	124.741	-0.00139901	0.994151	0.995289	72.9854
ENSMUSG00000002957	Ap2a2	9.06006	9.02381	9.05711	8.59313	8.88787	8.62374	8.91917	9.24114	8.95111	8.91458	9.42806	9.44195	9.38338	9.36959	9.53876	9.45794	9.57359	9.4962	9.54265	8.72368	8.61553	8.55173	8.61732	8.70824	8.77135	8.92717	9.41779	9.45543	9.53748	8.63031	8.69897	1529.52	-0.0678316	0.467642	0.695195	1350.84	0.00182646	0.985799	0.991876	1362.04	1.32713	1.76368e-27	1.63343e-26	1189.03	1.29515	8.48555e-33	6.47013e-32	955.355
ENSMUSG00000002963	Pnkp	3.06926	4.29437	2.27758	3.5511	4.7084	3.06742	3.7286	2.9667	3.30659	4.15647	4.09681	3.68958	3.75957	3.77772	3.51932	3.78429	3.81317	3.44359	3.30691	4.49955	4.3968	4.6945	5.29426	5.03379	5.33509	3.51265	3.84865	3.69378	3.52122	4.53028	5.22105	26.5278	0.26793	0.493124	0.714712	21.1573	0.732696	0.114126	0.208288	49.9446	-0.737248	0.0153418	0.0275003	66.5101	-1.62162	5.95444e-09	1.78124e-08	13.2349
ENSMUSG00000002968	Med25	4.98444	5.7736	3.90927	4.83251	5.06037	5.3379	5.62736	4.51204	4.98592	5.14432	5.13378	5.35238	4.82438	5.36903	4.93828	4.84966	5.3605	4.99602	4.75825	6.1269	6.50199	6.48117	5.6829	5.34999	5.53553	5.01677	5.10351	5.05232	5.03826	6.37002	5.52281	65.7725	0.065943	0.813777	0.915568	55.9174	0.298292	0.373347	0.515409	165.62	-1.45836	2.61566e-10	1.06452e-09	83.5634	-0.245992	0.350257	0.416997	37.7973
ENSMUSG00000002980	Bcam	4.16321	3.24338	5.5258	4.07412	3.4514	4.97323	3.23598	3.6918	2.85726	4.36566	2.81244	2.26085	2.49086	1.79782	1.33228	1.76745	2.69388	2.56958	2.00808	3.73056	3.95767	3.95691	2.52263	2.80347	2.52448	3.95819	2.52138	1.63252	2.42385	3.88171	2.61686	5.43106	2.25459	0.0242096	0.0955973	7.12653	0.388789	0.607507	0.728778	26.6279	-1.85045	9.59885e-06	2.69203e-05	9.42308	0.189408	0.762851	0.803234	2.79252
ENSMUSG00000002981	Clptm1	8.10512	8.26648	8.21024	8.29369	8.12276	8.41355	7.87549	8.16774	8.03881	7.93955	8.82377	8.74238	8.74134	8.90451	8.83278	8.82944	8.90149	8.97244	8.98574	9.35165	9.46451	9.53923	9.15183	9.37527	9.31385	8.14334	8.76916	8.85557	8.95322	9.45179	9.28032	932.93	-0.13137	0.172974	0.384509	831.008	-0.0945322	0.402877	0.54613	1500.35	-0.664623	1.49398e-08	5.38848e-08	1157.45	-0.376911	0.00142949	0.00273021	600.511
ENSMUSG00000002983	Relb	3.65065	2.98753	1.47487	2.42058	4.27654	3.67641	2.32463	1.7293	1.60295	2.57857	2.2872	2.04546	2.43814	2.91299	2.70442	1.86056	2.15188	1.67283	1.00677	2.50658	2.64777	2.04864	3.38326	3.60749	3.5154	2.6722	2.25693	2.49266	1.61049	2.40099	3.50205	10.304	-0.647967	0.293403	0.534265	5.14398	1.60826	0.105111	0.195061	11.0484	-0.0554852	0.925003	0.945514	20.0408	-1.73891	0.000105649	0.000228705	4.74262
ENSMUSG00000002984	Tomm40	6.30361	5.87543	4.94118	6.25188	6.6689	5.94279	6.58352	6.48147	6.32817	6.46617	6.28784	6.20005	6.15357	6.14178	5.85054	5.72909	7.28478	6.82779	6.53271	5.8623	5.95336	6.15175	5.99112	6.03306	6.01698	6.18431	6.21382	5.90714	6.88176	5.98914	6.01372	131.317	0.394627	0.0420265	0.143977	186.02	-0.785376	0.00158637	0.0053593	163.637	0.557905	0.0030228	0.0061442	140.528	0.599422	0.00100123	0.0019501	117.827
ENSMUSG00000002985	Apoe	10.8832	11.4559	11.034	12.0849	11.0031	11.2977	10.6355	10.7683	10.6322	10.4	9.06017	8.6529	8.76284	7.46782	7.43575	7.66908	9.4593	9.06071	8.97926	14.8307	15.0734	15.0003	13.5721	13.4653	13.5641	11.0195	8.8253	7.52422	9.16642	14.9681	13.5338	244.983	3.30046	1.87731e-44	3.39997e-42	469.555	-0.421263	0.0925957	0.176192	72609.6	-7.96956	0	0	18287.4	-6.16997	2.67713e-292	1.17147e-289	203.521
ENSMUSG00000002992	Apoc2	0	0	0	0	0	0	0	0	0	0	0	0	0	0	0	0	0	0	0	0	0	0	0	0	0	NA	NA	NA	NA	NA	NA	NA	NA	NA	NA	NA	NA	NA	NA	NA	NA	NA	NA	NA	NA	NA	NA	NA
ENSMUSG00000002996	Hbp1	5.42444	5.12904	5.51175	5.71808	5.19246	5.4968	5.89477	5.86597	5.74753	5.46371	4.20732	4.36208	3.98021	4.75545	4.69314	4.65687	4.43564	4.41438	4.67022	5.99204	5.71136	5.96074	7.27725	6.96909	7.13344	5.54446	4.1832	4.70182	4.50674	5.88804	7.12659	33.051	-0.789177	0.0212316	0.0866505	24.5237	-0.315538	0.437502	0.578298	90.482	-2.22613	1.08986e-17	6.77911e-17	205.259	-3.77796	3.16128e-64	5.32048e-63	22.5402
ENSMUSG00000002997	Prkar2b	6.17151	5.86117	4.92907	5.66427	6.2294	5.99681	6.41624	6.05535	6.15493	6.27604	6.66012	6.73004	6.79114	6.00047	6.20251	6.11956	6.41398	6.27582	6.00549	5.13503	4.94088	4.7382	4.50537	4.49546	4.41935	5.97548	6.7271	6.10751	6.23177	4.93804	4.47339	209.271	0.806665	3.42242e-07	5.3646e-06	189.627	0.819051	1.60668e-05	8.14773e-05	199.655	2.76456	2.66406e-40	3.82239e-39	163.261	3.60108	1.89461e-49	2.20427e-48	95.1139
ENSMUSG00000003031	Cdkn1b	5.17404	5.52151	5.00701	6.0662	4.9991	5.57721	5.95993	4.70208	5.66275	5.34928	5.66539	5.73506	5.81307	5.56667	5.58913	5.72175	7.17056	6.83586	7.1514	6.93753	7.03373	6.93765	6.791	6.81991	6.84934	5.40191	5.73784	5.62585	7.05261	6.96964	6.82008	93.6908	0.155609	0.461576	0.690714	183.974	-1.63737	1.10975e-16	1.83698e-15	237.796	-1.44099	8.35989e-19	5.44259e-18	181.289	-1.18028	6.0575e-13	2.25109e-12	124.968
ENSMUSG00000003032	Klf4	-0.588562	-0.661873	-0.385406	-0.302998	-0.43034	-0.484324	-0.00715588	-0.627356	0.171366	-0.18504	-0.784824	-0.790288	-0.761716	-0.744512	-0.76628	-0.224646	-0.607422	-0.438067	-0.721334	-0.246763	-0.445503	-0.298561	0.835203	0.0631837	0.999041	-0.350169	-0.778943	-0.57848	-0.588941	-0.330275	0.632476	0.369515	-2.05641	0.547498	NA	0.152475	-2.24404	0.581531	NA	0.897499	-3.44808	0.108387	0.159423	4.9027	-6.09498	2.90965e-05	6.6467e-05	0.335415
ENSMUSG00000003033	Ap1m1	8.05414	7.14746	7.15544	7.32162	7.48952	6.49333	7.57496	7.46496	7.21463	7.51321	6.78729	6.76738	6.74514	6.44023	6.84122	6.55395	6.22167	6.50357	5.96701	6.42246	6.52411	6.43368	6.76424	6.93301	6.79395	7.34293	6.7666	6.6118	6.23075	6.46008	6.8304	198.331	0.168329	0.323265	0.565587	146.505	0.873526	0.000145288	0.000620256	223.356	0.683904	1.79087e-05	4.88496e-05	221.811	0.220368	0.153623	0.203295	93.0227
ENSMUSG00000003037	Rab8a	5.75303	5.80525	4.21715	5.24177	5.09354	5.72613	5.7997	6.14464	5.99593	5.63668	5.71835	5.56887	5.78514	6.09608	5.9101	6.16306	6.0992	5.73346	5.98986	6.37957	6.43624	6.19796	7.20035	7.14259	7.24198	5.54138	5.69079	6.05641	5.94084	6.33792	7.19497	117.292	-0.525104	0.00760264	0.0386096	93.3237	-0.181296	0.447457	0.587334	161.108	-0.664096	0.000560543	0.00127455	233.66	-1.73795	2.61454e-27	1.68041e-26	77.7786
ENSMUSG00000003038	Hmgn2	1.07787	1.34709	0.620034	4.06219	2.27384	1.28596	1.31297	1.00287	0.879877	1.54124	1.05676	0.951365	0.0383265	1.50708	0.901215	0.222588	0.345154	0.487485	0.185897	1.1295	1.59861	2.00008	1.7971	1.48097	1.52731	1.54039	0.68215	0.87696	0.339512	1.57606	1.60179	2.76497	-0.52775	0.668917	0.83345	1.17521	1.93874	0.352424	NA	5.87685	-1.4732	0.0964505	0.144161	4.87363	-1.37126	0.134469	0.181097	1.11173
ENSMUSG00000003039	Fam32a	3.61993	5.58913	3.53835	5.57863	4.8409	4.66797	5.06688	4.84601	4.79309	4.80832	4.90619	4.88131	4.98214	5.68712	5.45953	5.19338	5.63689	5.48249	5.78038	5.46384	5.78809	5.31054	6.32916	6.07723	6.38127	4.73492	4.92321	5.44668	5.63325	5.52082	6.26255	75.3952	-0.813857	0.000700804	0.00520054	70.3996	-0.856234	0.000627299	0.00232455	91.8284	-0.630762	0.0103092	0.0190633	123.305	-1.56395	3.24623e-14	1.2724e-13	61.1989
ENSMUSG00000003051	Elf3	-1.59427	-0.583579	-1.50287	-1.4658	-1.52309	-1.54738	-1.68749	-1.61172	-1.64118	-1.64574	-1.74227	-1.74342	-1.73719	-1.72026	-1.73821	-1.65956	-1.60276	-1.34005	-1.41664	-1.73733	-1.73633	-1.73889	-1.71707	-1.7248	-1.71677	-1.48031	-1.74096	-1.70601	-1.45315	-1.73752	-1.71955	0	NA	NA	NA	0.563717	-3.43151	0.240963	NA	0	NA	NA	NA	0	NA	NA	NA	0.392544
ENSMUSG00000003053	Cyp2c29	0	0	0	0	0	0	0	0	0	0	0	0	0	0	0	0	0	0	0	0	0	0	0	0	0	NA	NA	NA	NA	NA	NA	NA	NA	NA	NA	NA	NA	NA	NA	NA	NA	NA	NA	NA	NA	NA	NA	NA
ENSMUSG00000003062	Stard3nl	5.27824	5.37286	5.24127	5.79882	5.82111	5.18647	5.05861	5.41463	5.11455	5.43054	5.2387	5.42067	5.19874	5.5207	5.61553	5.46523	5.76247	5.46859	5.53972	6.07055	6.05117	5.99336	6.68039	6.84657	6.86076	5.37171	5.28604	5.53382	5.59026	6.03836	6.79591	80.2571	-0.37007	0.103881	0.274219	70.2366	-0.245485	0.341297	0.482602	125.789	-0.799322	6.91704e-05	0.000176775	174.343	-1.75353	8.72689e-22	4.66649e-21	54.8847
ENSMUSG00000003068	Stk11	5.05911	5.46598	5.01416	6.55393	5.25254	5.88877	5.67321	5.22327	5.3581	5.41066	5.36763	5.13757	5.10554	5.10626	4.83298	4.68842	5.20144	5.24767	4.85138	5.2403	5.32177	5.6474	5.19172	5.39581	5.39373	5.48997	5.20358	4.87589	5.10016	5.40316	5.32708	62.1436	0.449248	0.0924519	0.253893	58.94	0.300738	0.301085	0.439831	95.3465	-0.0470211	0.845891	0.884899	77.6807	0.14369	0.550828	0.612796	34.6174
ENSMUSG00000003070	Efna2	0.494365	1.61383	0.69167	0.81684	1.39445	1.29455	1.08637	1.04518	1.28419	2.04306	1.59335	1.53152	1.16281	1.34015	1.63766	1.45037	0.480273	0.619086	1.12725	1.69362	2.3723	2.49451	0.698452	0.94072	0.317226	1.17645	1.42923	1.47606	0.742204	2.18681	0.652133	6.68341	-0.0971901	0.895139	0.958268	3.58033	2.03705	0.0909223	0.173619	14.0412	-1.19427	0.0345867	0.0577731	4.2641	2.55876	0.0257875	0.0406627	2.603
ENSMUSG00000003072	Atp5d	7.39138	7.20151	7.2539	7.06751	7.21032	7.05497	7.38752	7.35387	7.27742	7.4631	8.46049	8.36475	8.24167	8.24992	8.2486	8.13159	9.40255	8.83361	8.33897	8.6769	8.71896	9.02638	7.79776	7.92217	7.92072	7.26615	8.35564	8.21004	8.85838	8.80741	7.88022	681.464	0.181896	0.109159	0.283848	825.756	-0.599059	0.0341346	0.0777962	1077.1	-0.355457	0.0213643	0.0372211	620.606	0.962825	6.33621e-13	2.35245e-12	545.986
ENSMUSG00000003099	Ppp5c	7.4729	7.11505	7.36627	7.3143	7.60725	7.44751	7.12976	7.30275	7.31089	7.27541	7.878	7.82139	7.68006	7.84753	7.70267	7.67893	7.9231	8.02439	8.12694	7.64671	7.68853	7.68297	7.86753	7.94123	7.99642	7.33421	7.79315	7.74304	8.02481	7.67274	7.93506	455.074	0.0569899	0.648006	0.820848	442.853	-0.157676	0.286427	0.423753	528.65	0.420127	0.00192858	0.00404805	503.135	0.126452	0.34155	0.407918	300.719
ENSMUSG00000003119	Cdk12	5.88383	6.50775	6.82566	5.4989	6.30705	6.5143	5.84575	4.59853	5.99226	5.21713	6.01484	6.08243	6.08401	5.99781	6.05819	5.9254	5.75355	5.96626	6.11633	5.46443	5.4481	5.59082	6.4779	6.37012	6.22595	5.91912	6.06043	5.9938	5.94538	5.50112	6.35799	134.155	0.0655747	0.714812	0.861503	112.579	0.283182	0.178781	0.296252	133.267	1.04137	8.13357e-08	2.77197e-07	161.651	-0.106033	0.548193	0.610382	75.4346
ENSMUSG00000003123	Lipe	4.67474	3.95762	4.35046	2.28236	3.67566	3.8759	3.66565	4.15192	3.58639	3.65091	3.10446	2.96465	3.03929	2.05722	2.43843	2.59942	3.15015	3.66867	2.49863	4.30969	4.32472	4.54777	5.70221	5.50287	5.43143	3.78716	3.03613	2.36502	3.10582	4.39406	5.5455	8.71918	1.32041	0.0588913	0.184493	11.563	-0.16283	0.796579	0.866002	36.6644	-1.82983	1.38302e-07	4.61894e-07	76.7613	-3.31739	5.49695e-30	3.84689e-29	5.7332
ENSMUSG00000003131	Pafah1b2	7.40907	7.65866	7.3688	7.2135	7.53927	7.01085	7.76742	7.48406	7.5263	7.38615	8.11384	8.36124	8.28533	8.51199	8.3457	8.33783	8.54218	8.68123	8.62803	7.85381	7.8389	7.75853	7.90315	7.8594	7.93605	7.43641	8.25347	8.39851	8.61715	7.81708	7.89953	722.157	-0.206735	0.082418	0.236271	681.69	-0.326444	0.0204366	0.0503896	680.262	0.84697	2.18387e-09	8.33916e-09	597.248	0.797287	2.85253e-09	8.70007e-09	503.242
ENSMUSG00000003134	Tbc1d8	5.86401	5.54355	4.37409	4.63533	5.06236	5.23049	5.61405	5.41306	5.52748	5.95902	4.89087	4.71828	4.56319	4.09563	3.75225	4.13244	4.46549	3.66808	3.24792	3.46009	3.75073	3.28597	5.56491	5.34093	5.41996	5.32235	4.72411	3.99344	3.79383	3.49893	5.44193	39.4469	1.14043	0.000797196	0.00582553	33.3382	1.56855	0.000626764	0.00232318	42.7716	2.19271	1.20026e-09	4.66392e-09	79.2978	-0.67489	0.00493312	0.00874833	14.1564
ENSMUSG00000003135	Cnot11	4.72136	5.40056	5.36959	3.98079	5.31126	5.42788	5.05592	5.80743	5.01218	5.10966	6.29995	6.30176	6.29125	6.05507	6.11623	6.1757	5.98655	6.04821	6.15155	6.17762	6.20204	6.23472	6.22155	6.2106	6.01089	5.11966	6.29765	6.11567	6.06211	6.20479	6.14768	168.549	0.237106	0.146468	0.344931	141.412	0.468269	0.0112989	0.0302966	210.188	0.373437	0.0187402	0.0330015	175.231	0.508865	0.00288199	0.00528706	89.2093
ENSMUSG00000003153	Slc2a3	7.65432	7.62451	7.39796	6.84383	7.47005	7.08609	7.17759	7.12414	7.27347	7.62191	7.98991	7.93096	7.89766	7.61755	7.6769	7.67116	8.17176	8.09438	8.11697	6.63706	6.68694	6.08467	5.84966	5.87951	5.86883	7.32739	7.93951	7.6552	8.12771	6.46956	5.866	514.756	0.365647	0.00107415	0.00755682	540.454	-0.0839779	0.491351	0.626723	457.441	2.24862	5.0279e-27	4.56848e-26	361.042	3.29282	1.02658e-84	2.64675e-83	333.741
ENSMUSG00000003154	Foxj2	5.30649	5.61814	5.53458	5.17698	6.45444	6.04057	5.63703	5.54438	5.54137	5.33002	5.77393	5.81089	5.55125	5.90462	5.59146	5.37867	5.71359	5.78842	5.85183	5.33207	5.43479	5.53003	6.19287	6.20689	6.44393	5.6184	5.71202	5.62492	5.78462	5.4323	6.28123	102.408	0.0834965	0.70739	0.857105	93.4951	0.062742	0.78368	0.85738	112.354	0.669354	0.00187425	0.00394212	143.799	-0.480983	0.0150239	0.0246763	62.5575
ENSMUSG00000003161	Sri	5.46811	5.45723	6.34945	6.54332	5.34991	5.35653	5.43949	5.06066	5.18714	5.40164	6.36725	6.29936	6.12876	6.27111	6.24979	6.25895	7.16497	6.67162	6.78376	7.46129	7.39632	7.66537	7.91525	7.97549	7.95505	5.56135	6.26512	6.25995	6.87345	7.50766	7.9486	148.746	0.00870912	0.960604	0.985683	176.272	-0.665839	0.00254838	0.00816889	356.861	-1.4165	6.15922e-18	3.87694e-17	402.346	-1.90871	6.46804e-42	6.19775e-41	122.23
ENSMUSG00000003166	Dgcr2	2.244	1.01456	3.1125	0.842158	2.73137	3.14514	4.06298	2.1279	3.70183	3.95861	-0.174271	0.88423	1.01833	0.064887	-0.0547526	0.224602	0.382468	0.00166778	0.78496	1.01019	0.481161	1.10835	0.614031	1.59425	0.615288	2.6941	0.576097	0.0782455	0.389699	0.866566	0.941189	0.946978	2.82583	0.201706	NA	1.113	1.51117	0.486029	NA	2.63894	-0.249854	0.84281	0.882876	2.50627	-0.482999	0.719762	0.766109	0.179654
ENSMUSG00000003184	Irf3	3.37374	3.61522	4.85806	4.77563	2.91314	3.16544	3.59785	2.80627	3.39418	3.88917	3.83878	3.66591	3.72553	3.21197	3.83252	3.61321	4.56883	4.25939	4.22423	4.96719	4.96793	5.4675	5.88474	5.74003	5.58869	3.63887	3.74341	3.55257	4.35082	5.1342	5.73782	21.2812	0.233351	0.589049	0.78057	28.3181	-0.730058	0.048382	0.103543	67.1631	-1.79117	1.3641e-09	5.27171e-09	87.4358	-2.50321	2.95149e-23	1.65994e-22	18.4775
ENSMUSG00000003190	Bcl2l12	-0.457732	-0.555785	-0.186015	-0.0757965	-0.246113	-0.318316	-0.0828717	-0.509618	-0.579003	-0.58491	-0.767498	-0.781397	-0.711948	-0.673452	-0.332298	-0.602505	-0.482957	-0.699871	-0.624679	1.13855	0.941312	0.950704	1.83621	1.50573	1.83802	-0.359616	-0.753614	-0.536085	-0.602502	1.01019	1.72665	0.158755	-1.99693	0.624295	NA	0	NA	NA	NA	5.28101	-6.0001	1.60427e-05	4.39432e-05	10.3641	-7.17704	3.16608e-08	9.05342e-08	0.097895
ENSMUSG00000003198	Zfp959	1.37808	2.93599	1.63281	3.64248	2.25966	2.55962	3.9505	3.40162	3.61179	3.16794	2.48785	2.2086	2.60723	2.48493	2.60567	2.73207	2.93867	2.43471	2.482	2.59777	3.03336	2.24969	2.94473	3.30406	3.08205	2.85405	2.43456	2.60756	2.61846	2.62694	3.11028	10.3766	-0.318553	0.592276	0.783314	8.99246	-0.133271	0.838491	0.894029	12.8187	-0.173566	0.760697	0.815058	14.6616	-0.879683	0.0810005	0.115832	6.91153
ENSMUSG00000003199	Mpnd	5.63957	5.8215	5.02988	4.6787	5.26717	5.42714	5.56661	5.14846	5.20851	5.42425	5.52542	5.38609	5.26595	5.54882	5.43144	5.03523	5.2616	5.02663	5.03494	5.52052	5.97085	5.87115	5.03478	5.4093	5.22776	5.32118	5.39249	5.3385	5.10772	5.78751	5.22395	84.3533	0.0186338	0.936705	0.975501	64.6972	0.608385	0.0248171	0.0593555	125.328	-0.311742	0.164332	0.230418	81.4962	0.552354	0.0239716	0.0379789	43.8501
ENSMUSG00000003200	Sh3gl1	4.58112	5.12048	5.14033	5.61801	4.47486	4.71097	4.23782	4.27305	4.61515	4.74994	5.38991	5.34939	5.21012	5.59348	5.537	5.52282	6.15507	5.307	5.64787	5.58607	5.56201	5.58571	6.61713	6.48003	6.80209	4.75217	5.31647	5.5511	5.70332	5.57793	6.63308	89.6828	-0.335676	0.115056	0.293935	84.8488	-0.401998	0.191252	0.312091	107.434	-0.108666	0.596358	0.67205	169.62	-1.47135	6.39774e-15	2.5935e-14	65.3305
ENSMUSG00000003206	Ebi3	-0.115837	0.656385	0.272073	0.429423	0.186275	0.0831962	-0.466649	-0.189911	-0.304279	1.09157	0.273629	0.365319	-0.0471151	-0.582146	-0.106087	0.478893	-0.151849	-0.672094	-0.43166	-0.0549727	0.440343	-0.783239	6.59514	6.4965	6.5501	0.164225	0.197277	-0.0697801	-0.418534	-0.132623	6.54725	1.3512	0.846529	0.61624	NA	0.743807	2.37749	0.29283	NA	1.66391	0.950765	0.52936	0.610279	87.2607	-6.43991	1.22882e-31	9.02034e-31	0.326865
ENSMUSG00000003208	Yju2	1.92266	1.24267	1.61737	1.73325	1.55428	2.57001	2.42778	2.71552	2.06067	1.1916	2.76068	3.12988	3.09465	3.20477	3.061	3.51381	2.95923	2.77167	2.48754	3.79973	3.52645	3.58567	4.32192	4.17012	4.18494	1.90358	2.99507	3.25986	2.73948	3.63728	4.22566	20.9227	-0.404085	0.349807	0.591635	13.4261	0.597579	0.27907	0.415585	30.6416	-0.729171	0.046203	0.0749904	38.2578	-1.49981	5.78721e-06	1.40178e-05	11.2331
ENSMUSG00000003226	Ranbp2	9.35126	9.08727	9.4347	8.92221	8.81347	8.08397	9.16726	9.3216	9.09063	8.80688	8.98377	9.00935	9.08057	8.90766	9.06741	9.1196	7.93169	8.04219	8.28952	8.10366	7.89322	7.88342	8.73566	8.62005	8.62051	9.00792	9.02456	9.03156	8.0878	7.9601	8.65874	1131.14	-0.0264364	0.795144	0.906244	691.783	1.43744	2.9605e-20	6.14741e-19	950.317	1.7291	1.17305e-35	1.45213e-34	995.133	0.806355	4.17624e-13	1.5649e-12	482.073
ENSMUSG00000003227	Edar	-1.01846	-0.0922619	-0.880389	-0.824384	-0.910927	-0.947616	-1.15749	-0.275446	-1.08932	-1.09622	-0.894184	-1.18624	-1.17361	-1.1657	-1.17567	-0.736533	-1.03128	-0.912466	-1.14427	-0.750152	-0.723391	-0.529731	-1.16496	-1.16673	-1.16489	-0.829251	-1.08468	-1.02597	-1.02934	-0.667758	-1.16553	0.572522	-0.263179	0.92356	NA	0.336477	-0.464759	0.897129	NA	1.68427	-2.31367	0.161441	0.226773	0.231231	1.08262	0.788716	NA	0.335415
ENSMUSG00000003228	Grk5	3.3527	3.59215	1.88003	5.24982	3.8487	3.5077	3.60468	4.03313	3.49346	4.02839	3.07362	3.02719	2.99082	3.18331	2.97357	3.05131	1.56024	3.52658	3.98864	2.85042	2.7681	2.32609	2.43565	3.00715	3.06038	3.65907	3.03054	3.0694	3.02515	2.6482	2.83439	15.5302	-0.069683	0.885308	0.953934	16.0228	-0.509173	0.449459	0.589191	15.2346	0.887695	0.0802217	0.122314	14.1924	0.595417	0.250605	0.310677	11.322
ENSMUSG00000003233	Dvl3	5.60574	5.8726	5.49322	5.46458	5.70575	5.52253	6.24102	5.5851	5.7642	6.09429	6.01835	6.06837	5.90884	5.4104	5.17457	5.26178	6.68046	6.64512	6.11393	5.98796	6.3356	6.54035	5.57075	5.67482	5.43665	5.7349	5.99852	5.28225	6.47984	6.28797	5.56074	99.9293	1.02826	2.13833e-06	2.89279e-05	148.082	-0.527002	0.0249254	0.059574	185.586	-0.174138	0.407609	0.493471	115.295	0.93445	6.17243e-06	1.49155e-05	81.76
ENSMUSG00000003234	Abcf3	6.83684	6.32072	6.37834	5.57291	6.02608	5.94653	6.668	6.61768	6.78412	6.71322	6.66307	6.63747	6.57934	6.58151	6.5963	6.49461	6.68935	6.76512	6.66603	6.2891	6.34321	6.57038	6.73204	6.52327	6.58714	6.38644	6.62663	6.55747	6.70683	6.4009	6.61415	198.958	0.0758962	0.619961	0.802	181.891	0.0425868	0.798784	0.866789	224.027	0.553408	0.00122879	0.00266733	208.017	0.328112	0.0434277	0.0656353	122.206
ENSMUSG00000003235	Eif2b5	6.2288	6.19836	5.46115	6.06259	6.24773	6.20367	6.51707	6.51549	6.29298	6.50783	5.99915	5.87261	5.75077	5.85209	5.67279	5.96243	5.8984	5.95668	5.6064	6.07465	6.04537	6.16339	5.74274	5.66965	5.85357	6.22357	5.87418	5.8291	5.82049	6.09447	5.75532	111.425	0.078139	0.70208	0.854258	94.8941	0.229925	0.339224	0.480833	150.65	-0.0511137	0.78612	0.83637	109.815	0.494455	0.0186392	0.0301183	64.377
ENSMUSG00000003269	Cyth2	7.01215	6.60408	6.63501	5.50884	5.90664	6.04562	6.22144	6.26066	6.316	6.50287	7.69549	7.76273	7.75405	7.27709	7.07155	6.92107	6.92966	6.7585	6.76717	6.69759	6.68123	6.51813	6.37291	6.23598	6.26709	6.30133	7.73743	7.0899	6.81844	6.63231	6.29199	429.686	0.820058	3.87208e-10	9.18471e-09	343.99	1.39973	5.18912e-21	1.12234e-19	466.792	1.73022	2.84576e-33	3.22902e-32	375.24	2.27541	2.11629e-54	2.80858e-53	162.122
ENSMUSG00000003271	Sult2b1	2.75589	2.55195	1.52866	1.63937	2.63549	1.3972	3.02305	3.13064	2.7978	2.61672	3.7114	3.70705	3.92742	3.90135	3.8596	3.89475	2.1929	2.84141	2.25487	1.44907	2.25065	2.27172	1.35011	2.14644	1.85375	2.40768	3.78196	3.88523	2.42973	1.99048	1.78343	45.4182	-0.175961	0.545782	0.753691	23.4209	2.08846	2.73051e-05	0.000133408	31.1265	3.09098	6.12995e-11	2.60244e-10	26.0564	3.67055	3.78853e-10	1.21599e-09	17.671
ENSMUSG00000003273	Car11	6.47209	6.12919	5.19185	6.61898	6.23681	6.65387	5.42907	5.34516	5.87494	5.79485	6.72111	6.65315	6.59355	6.57362	6.17271	6.22859	5.05126	5.63646	5.43306	5.58651	5.59706	5.48124	4.60083	5.1517	4.64074	5.97468	6.65593	6.32497	5.37359	5.55494	4.79776	217.69	0.414039	0.0127166	0.0581862	142.161	1.83791	2.47115e-15	3.7663e-14	209.591	1.77113	7.60226e-24	6.08778e-23	158.875	2.93076	1.48253e-34	1.19337e-33	78.4873
ENSMUSG00000003279	Dlgap1	10.8685	10.1263	10.016	9.3844	9.83602	9.31373	9.8699	10.1708	9.84662	10.0899	9.59844	9.44995	9.4324	9.71612	9.63164	9.49947	8.65419	8.72998	8.60081	8.53435	8.74362	8.39346	7.07726	7.82629	7.63196	9.95221	9.4936	9.61574	8.66166	8.55714	7.51184	1640.24	-0.18155	0.076242	0.223441	975.329	1.30799	9.11498e-24	2.32631e-22	1347.98	1.54008	2.5471e-23	1.99659e-22	967.521	3.15677	5.7541e-42	5.52709e-41	733.07
ENSMUSG00000003282	Plag1	0.993516	2.2253	1.88777	2.09315	2.38102	1.97785	0.180577	0.300764	1.45383	1.64445	0.880432	0.891016	0.436951	0.547686	0.843113	1.35815	0.316358	0.471922	1.26705	0.885141	1.10086	0.0706913	1.07645	1.37525	0.140753	1.51382	0.736133	0.916317	0.685109	0.685563	0.86415	3.01621	-0.439652	0.693601	0.850188	2.01349	0.196216	0.889102	0.928044	2.9343	0.277269	0.816719	0.860625	3.01672	-0.246203	0.83357	0.864124	1.76832
ENSMUSG00000003283	Hck	2.21243	0.272149	0.800628	0.969348	3.73529	2.87558	2.02901	1.17831	2.38572	2.11967	-0.574928	0.463696	0.327163	-0.126705	-0.339609	0.134458	0.375127	-0.236928	0.0571899	-0.297083	0.377949	-0.373838	8.70749	8.50331	8.51467	1.85781	0.0719769	-0.110619	0.0651297	-0.0976573	8.57516	0.431524	1.71244	0.557202	NA	0.38935	1.42645	0.671207	NA	0.763765	1.52027	0.518358	0.599925	371.427	-9.53932	1.57434e-38	1.40117e-37	0
ENSMUSG00000003299	Mrpl4	5.51285	5.05278	3.98346	5.88158	5.74741	5.38653	4.7782	5.2136	5.19239	5.4434	5.64268	5.56648	5.46165	5.49418	5.40631	5.44286	5.59221	5.58312	5.17275	5.61217	5.90807	5.90323	5.44035	5.54621	5.37543	5.21922	5.55693	5.44778	5.44936	5.80782	5.454	93.8125	0.151624	0.472502	0.70018	80.8672	0.298723	0.240282	0.372032	133.348	-0.10343	0.610181	0.684509	96.2171	0.462935	0.0311058	0.0483292	52.9677
ENSMUSG00000003308	Keap1	6.75348	6.73822	5.93934	6.78977	7.14553	6.94502	6.64109	6.71721	6.5614	7.13846	6.13699	6.10665	5.93701	6.14438	5.97131	6.01299	6.14996	5.83879	5.60845	5.67577	5.81207	6.02628	6.30629	6.26353	6.38006	6.73695	6.06021	6.04289	5.86573	5.83804	6.31663	124.287	0.0231574	0.903184	0.9622	98.7805	0.45554	0.0668921	0.135974	136.469	0.564227	0.00662885	0.0127023	143.486	-0.0366548	0.841867	0.870949	67.8252
ENSMUSG00000003309	Ap1m2	0.948509	-0.0700337	-0.32939	-0.243856	0.225954	0.651851	-0.243246	-0.580522	-0.645652	-0.126109	-0.229331	-0.178672	0.145759	-0.695447	-0.2195	-0.166368	-0.559832	-0.383987	-0.670452	-0.714743	-0.709982	-0.722316	-0.317938	-0.0781379	-0.693573	-0.0412494	-0.0874147	-0.360438	-0.53809	-0.71568	-0.363216	2.02244	0.953352	0.501519	0.721253	1.35824	2.10146	0.233958	0.364566	1.74104	4.08041	0.0196125	0.0344188	2.12777	1.22541	0.374554	0.440949	0.531205
ENSMUSG00000003316	Glg1	9.44947	9.43428	9.29951	9.47781	8.91956	9.31705	9.23568	9.17881	9.08982	9.22182	9.97932	9.87195	9.93745	10.1606	10.0646	10.0436	10.3693	10.3937	10.6557	9.94449	9.94994	9.74218	9.85796	10.0399	10.0792	9.26238	9.92957	10.0896	10.4729	9.87887	9.99235	2219.11	-0.230848	0.00811264	0.0406451	2296.41	-0.574399	3.04057e-05	0.000147479	2404.73	0.311247	0.0144511	0.0260497	2144.37	0.223189	0.0514105	0.0767067	1698.42
ENSMUSG00000003341	Atp8b3	0.238438	-1.01384	1.32011	-0.592481	-0.0610461	1.08474	-0.57014	-0.973309	-1.05019	-0.428023	-1.26986	-1.2812	-1.2246	-1.19332	-1.23322	-1.09816	-0.949905	-0.749459	-1.14512	-0.788899	-1.21758	-0.83727	-1.19053	-0.687427	-1.19027	-0.204574	-1.25855	-1.1749	-0.94816	-0.947918	-1.02274	0	NA	NA	NA	0.152475	-2.24404	0.581531	NA	0.347803	-2.08947	0.529723	NA	0.201935	-1.6615	0.683878	NA	0.106445
ENSMUSG00000003344	Btbd2	6.07729	6.10594	6.16408	6.09068	6.58546	6.36008	6.27986	6.30972	6.18708	6.44168	6.09695	6.16044	5.97565	6.25075	5.74008	5.4689	6.95847	6.24312	5.7178	5.85537	6.11361	6.32244	5.65052	5.71159	5.80074	6.26019	6.07768	5.81991	6.30647	6.09714	5.72095	122.254	0.274988	0.229029	0.46028	136.353	-0.283588	0.420273	0.562166	163.677	0.206077	0.318761	0.402065	118.95	0.831508	3.51756e-05	7.96151e-05	86.9346
ENSMUSG00000003345	Csnk1g2	6.68082	6.10725	5.74749	5.52415	6.15546	6.07578	6.68966	6.50622	6.60046	6.56267	5.51054	5.47428	5.29825	5.75647	5.30733	5.57457	5.49208	4.93045	4.82363	4.74076	4.94833	4.9502	5.55445	5.68184	5.52483	6.265	5.42769	5.54612	5.08205	4.87976	5.58704	85.9795	-0.175159	0.452091	0.68285	59.7285	0.698986	0.0258479	0.0613297	76.9799	1.07909	1.39037e-05	3.83545e-05	87.9048	0.0953166	0.668229	0.720113	44.852
ENSMUSG00000003346	Abhd17a	5.89011	4.99098	3.46945	4.57478	5.40475	6.10334	5.80401	5.06259	5.58676	5.97999	5.43387	5.55869	5.47553	4.97064	5.0235	4.61134	5.26495	5.26774	4.43257	4.73643	4.8357	4.62303	4.48937	4.86697	4.52663	5.28667	5.48936	4.86849	4.98842	4.73172	4.62766	78.5904	0.814312	0.00067823	0.00506669	72.342	0.785065	0.0132927	0.0348375	92.1204	1.33935	7.06866e-09	2.60653e-08	76.8531	1.5373	2.47805e-09	7.57847e-09	35.9283
ENSMUSG00000003348	Mob3a	2.84379	3.04397	1.93093	2.07012	2.5378	3.76843	3.41252	2.96035	3.24373	3.07602	2.80528	3.11781	2.91329	2.71117	2.15396	2.44534	3.64242	3.47242	3.48465	3.76423	3.97185	4.10113	5.84659	5.96933	6.1562	2.88877	2.94546	2.43682	3.53317	3.94574	5.99071	10.0079	0.913043	0.152352	0.354545	15.6811	-0.713643	0.139944	0.24506	28.6269	-1.2464	0.00104372	0.00228566	116.76	-3.88028	1.72936e-46	1.86721e-45	9.04442
ENSMUSG00000003352	Cacnb3	6.75202	6.90621	5.85551	5.33208	5.9251	6.91806	6.19319	5.68012	5.99803	6.23835	7.0553	6.9567	7.02738	6.65022	6.6539	6.30944	4.98278	4.63378	5.0519	5.25346	5.23527	4.74139	4.09679	4.7164	4.59113	6.17987	7.01313	6.53785	4.88948	5.0767	4.46811	285.11	0.572345	9.06947e-05	0.000859004	172.875	3.18326	6.58723e-39	3.14506e-37	253.728	2.90909	6.22507e-44	1.00338e-42	206.783	3.92004	1.69413e-58	2.48026e-57	82.462
ENSMUSG00000003354	Ccdc65	3.8283	3.59608	3.46707	4.52189	2.61918	3.18771	4.00818	3.8935	3.68288	3.87756	4.15838	4.31916	4.34589	3.76757	4.07109	3.70803	3.5382	3.49589	3.15495	3.44193	3.37629	3.13313	2.23638	2.36785	1.42035	3.66823	4.27448	3.8489	3.39635	3.31712	2.00819	42.3142	0.550381	0.0783512	0.228076	31.3016	1.46879	0.000175252	0.000734552	43.4405	1.69253	2.9631e-07	9.59378e-07	30.1958	4.28592	1.03924e-11	3.62754e-11	16.2448
ENSMUSG00000003355	Fkbp11	1.62202	0.106372	0.42864	0.556386	0.358985	0.2753	0.518305	0.134381	0.687811	1.05319	1.06847	0.672535	0.562947	-0.0445963	-0.110444	0.0503292	1.57353	1.86416	1.83427	2.51472	2.76002	2.51665	0.730787	0.393018	-0.0395546	0.57414	0.767985	-0.0349037	1.75732	2.59713	0.361417	1.58818	3.60604	0.0401676	0.13878	6.45315	-1.79819	0.0204638	0.0504159	18.5617	-2.94462	9.51176e-08	3.21748e-07	2.43377	1.5278	0.251183	0.311296	3.50506
ENSMUSG00000003360	Ddx23	7.41048	8.52468	9.3529	7.22519	6.96312	7.3121	7.54635	6.80863	6.63223	6.83074	7.12399	6.99082	7.19846	7.16357	6.67523	6.97576	7.17861	7.02609	6.97236	7.23044	7.21637	7.33559	7.95263	7.70088	7.91987	7.46064	7.10442	6.93819	7.05902	7.2608	7.85779	243.049	0.208241	0.227382	0.458321	218.13	0.231437	0.181269	0.299455	334.932	0.0267059	0.859398	0.895178	388.82	-0.723455	1.97225e-06	4.96387e-06	140.218
ENSMUSG00000003363	Pld3	9.79753	9.75502	9.38894	9.79737	9.66493	9.4	9.21325	9.22427	9.16511	9.32912	11.1728	11.0515	10.9994	10.7832	10.5136	10.4519	9.58628	9.35965	9.27304	9.53514	9.55827	9.39224	10.0596	10.2345	10.1935	9.47355	11.0746	10.5829	9.40632	9.49522	10.1625	4663.24	0.613174	2.64661e-08	4.81273e-07	3036.95	2.39175	1.00096e-60	1.00361e-58	4394.54	2.35637	6.44388e-80	2.55378e-78	4313	1.50631	2.30941e-40	2.13624e-39	1478.04
ENSMUSG00000003378	Grik5	7.16795	7.29397	7.71427	7.7592	7.27311	7.40384	7.20124	6.49282	6.99995	7.1543	6.52569	6.43609	6.37941	6.51188	6.54186	5.94892	5.22724	5.01265	5.22989	5.76623	5.90008	5.93804	4.66625	5.15852	5.23958	7.24607	6.44706	6.33422	5.15659	5.86812	5.02145	173.018	0.071293	0.707136	0.856945	100.28	2.10223	1.04336e-16	1.73117e-15	172.487	1.06781	3.88547e-09	1.45911e-08	120.571	2.39218	2.92334e-22	1.58962e-21	64.9842
ENSMUSG00000003379	Cd79a	-2.23973	-2.24433	-2.22697	-2.2218	-2.22979	-2.23318	-2.25273	-2.24216	-2.24627	-2.24691	-2.23988	-2.26686	-2.26265	-2.25731	-2.26426	-2.24884	-2.24091	-2.22448	-2.25135	-2.26286	-2.26138	-2.26539	-2.25686	-2.25794	-2.25682	-2.23839	-2.25646	-2.2568	-2.23891	-2.26321	-2.25721	0.101503	-0.0958564	0.981258	NA	0.244476	-1.28254	0.748136	NA	0.132477	0.67431	0.868747	NA	0.115615	0.26208	0.948789	NA	0.106445
ENSMUSG00000003380	Rabac1	6.35164	6.58699	5.91656	5.99922	6.21751	6.22839	6.29994	5.73177	6.25988	6.16354	7.50041	7.35805	7.17281	7.17627	7.07265	6.69225	8.01949	8.11498	7.78041	7.96455	8.24838	8.3157	7.99767	8.19794	8.2101	6.17554	7.34376	6.98039	7.97163	8.17621	8.13524	299.8	0.455159	0.00624077	0.0329936	409.146	-0.67613	0.000197613	0.000816913	637.115	-0.850216	4.2813e-07	1.368e-06	523.729	-0.725309	2.61456e-06	6.51799e-06	253.617
ENSMUSG00000003382	Etv3	3.62065	4.07516	4.67445	4.66583	4.52563	4.96897	4.59365	4.4139	4.59049	4.35024	4.05625	3.94203	4.1577	3.96549	4.30364	3.76753	3.5669	4.35999	4.06294	3.39357	3.8475	3.7987	5.37043	5.10696	5.41186	4.4479	4.05199	4.01222	3.99661	3.67992	5.29642	30.2273	-0.0378606	0.916966	0.968875	25.8361	0.0905274	0.827595	0.886111	31.0858	0.811037	0.0272096	0.0463418	65.584	-1.50286	1.13902e-08	3.34571e-08	17.6775
ENSMUSG00000003402	Prkcsh	6.45608	6.60749	6.44617	7.008	6.95744	6.82945	6.34737	6.84425	6.41223	6.3401	7.46455	7.3125	7.32232	7.77014	7.41563	7.60357	8.18916	8.12822	8.11708	8.37367	8.59075	8.66816	8.65665	8.91566	8.76585	6.62486	7.36646	7.59645	8.14482	8.5442	8.77939	361.803	-0.33283	0.019936	0.0827329	412.257	-0.887804	9.56338e-11	9.64376e-10	731.673	-1.33008	6.89822e-20	4.68918e-19	716.167	-1.56713	1.29974e-30	9.25622e-30	312.067
ENSMUSG00000003410	Elavl3	5.72381	6.9689	6.32416	6.6626	6.21492	6.63534	6.73838	5.81588	7.02153	6.68413	6.90199	6.87541	6.75576	6.93789	6.91595	6.73675	7.6356	7.64099	7.54694	5.87924	5.79467	5.52442	5.31026	5.44849	5.31232	6.47897	6.84439	6.86353	7.60784	5.73278	5.35702	256.824	-0.0498594	0.729333	0.869147	320.742	-0.847203	3.93243e-09	3.31728e-08	211.97	1.81772	5.06181e-21	3.62338e-20	168.894	2.47156	4.5158e-34	3.58556e-33	224.73
ENSMUSG00000003411	Rab3b	7.6401	6.57991	6.6019	6.61967	6.60185	6.21077	6.75589	7.24128	6.86292	7.01531	6.28211	6.22582	6.18013	5.44925	5.99026	5.21955	7.19454	6.98356	6.72595	5.41701	5.2537	4.79234	4.29416	4.95517	4.85526	6.81296	6.22935	5.55302	6.96802	5.15435	4.70153	118.135	0.827855	0.000408695	0.00326299	195.026	-0.844058	1.64736e-05	8.339e-05	129.168	1.78059	4.82299e-13	2.35004e-12	101.258	2.56212	1.79283e-21	9.48053e-21	113.668
ENSMUSG00000003418	St8sia6	0.366248	0.281647	0.643693	0.7885	0.564735	0.487711	0.133227	1.80504	1.62815	1.83953	-0.15057	0.852359	-0.0242669	2.41715	2.06738	2.11035	0.344353	1.55497	2.25528	0.970757	0.780763	-0.0634163	3.38796	4.13856	3.56855	0.853848	0.225841	2.19829	1.38487	0.562701	3.69836	7.72697	-3.81116	4.80964e-05	0.000487217	3.37726	-2.83911	0.0650298	0.132601	1.53223	-0.640619	0.726636	0.785677	30.0958	-5.61509	3.2975e-13	1.24005e-12	6.57251
ENSMUSG00000003420	Fcgrt	4.11943	4.23122	5.03461	5.51913	5.52274	3.71327	3.5365	4.79592	4.33237	3.73996	2.35278	1.76832	1.41534	1.91403	2.14288	2.51823	1.97703	2.84176	3.40822	6.54117	6.69254	7.08837	7.61314	7.59561	7.6314	4.45452	1.84548	2.19172	2.74233	6.77403	7.61339	2.41817	-0.4487	0.726423	0.867384	4.01683	-1.8357	0.138796	0.243353	206.515	-7.17088	2.05508e-45	3.49171e-44	342.34	-8.09988	1.06648e-64	1.81233e-63	3.07629
ENSMUSG00000003421	Nosip	5.41349	3.8115	5.41995	3.23373	4.88199	4.31216	4.79058	4.61996	4.88094	4.51944	5.83677	5.68181	5.82834	5.78247	5.54577	5.49814	6.17436	5.84264	5.57146	5.62523	5.90989	6.00507	6.14948	6.10314	6.33629	4.58837	5.78231	5.60879	5.86282	5.84673	6.1963	115.511	0.20813	0.294087	0.534911	111.823	0.0411882	0.864145	0.911072	153.993	0.142872	0.473124	0.55709	153.899	-0.255851	0.159763	0.210325	71.9419
ENSMUSG00000003423	Pih1d1	4.26617	4.14344	4.64772	4.91278	4.34897	4.01097	4.64391	4.03752	4.43681	3.92469	5.59815	5.46722	5.49888	5.26272	5.04603	4.8116	5.32642	5.14366	4.86139	5.43364	5.4034	5.53057	6.0207	6.21425	6.29598	4.3373	5.52142	5.04012	5.11049	5.45587	6.17698	87.1326	0.619928	0.00650288	0.0341102	77.316	0.737482	0.00384322	0.0117379	123.958	0.336631	0.0852025	0.129124	149.6	-0.575952	0.00173802	0.00328324	41.5218
ENSMUSG00000003429	Rps11	5.32054	5.48013	5.66311	4.48776	5.1466	5.54605	5.11194	4.73449	4.54408	5.57256	5.87799	6.14353	6.17835	6.2293	6.33223	6.32382	7.06135	7.02332	7.03988	6.72821	6.75159	6.92293	7.75706	7.57154	7.58861	5.16073	6.06662	6.29512	7.04152	6.80091	7.63907	149.642	-0.327147	0.0716353	0.213631	193.595	-1.1543	2.90757e-10	2.77833e-09	231.987	-0.751922	2.73656e-05	7.33343e-05	332.304	-1.77956	1.37139e-27	8.89765e-27	144.648
ENSMUSG00000003435	Supt5	7.85471	8.04863	7.87835	7.88506	8.03076	7.58484	7.57458	7.91937	7.49728	7.64639	8.22794	8.14716	8.09306	7.95379	7.99853	8.07541	7.80246	7.4909	7.45859	7.03461	6.94505	7.19169	8.29276	8.08467	8.09801	7.792	8.15605	8.00925	7.58398	7.05712	8.15848	588.179	0.190585	0.0856351	0.242083	431.335	0.950729	8.63579e-09	7.01914e-08	526.34	1.77858	1.45972e-33	1.67375e-32	640.283	0.306117	0.0217899	0.0347496	273.968
ENSMUSG00000003436	Dll3	-1.23153	-1.26392	-1.14177	-1.10536	-1.16163	-1.18548	-1.07523	-1.24867	-1.2776	-1.28208	-1.14491	-1.25414	-1.3418	-1.33861	-1.18659	-1.29565	-1.23986	-1.01087	-1.05848	-0.921858	-1.16305	-1.19515	-1.12045	-1.33903	-1.33828	-1.19733	-1.24695	-1.27362	-1.10307	-1.09335	-1.26592	0.44866	0.255049	0.925393	NA	0.826173	-1.19069	0.562581	NA	1.30332	-1.17219	0.48528	0.568738	0.545474	0.605289	0.814664	NA	0.490439
ENSMUSG00000003437	Paf1	7.25094	6.85208	7.13564	7.29804	7.04742	6.50082	7.14478	7.34685	6.62244	7.25529	6.99137	6.98324	6.86322	6.85043	7.07963	7.2672	6.30903	6.43925	6.38503	6.72388	6.70361	6.77446	6.94295	6.79558	7.0951	7.04543	6.94594	7.06575	6.37777	6.73398	6.94454	267.797	-0.177193	0.251343	0.486452	170.573	0.955103	1.77608e-07	1.20614e-06	274.33	0.548405	0.000307017	0.000722019	255.384	0.312085	0.0554723	0.0821834	128.56
ENSMUSG00000003438	Timm50	5.74567	5.24386	4.81785	5.74475	4.36133	5.94063	5.64146	5.67091	5.77223	5.37762	5.10143	5.1615	5.17648	5.28014	5.2842	5.21126	5.85642	5.98953	5.85148	5.64274	5.75593	5.69081	5.70865	5.47992	5.58687	5.43163	5.14647	5.25853	5.89914	5.69649	5.59181	68.0615	-0.185641	0.437028	0.671449	83.2959	-0.928671	3.48769e-05	0.000167603	102.221	-0.542036	0.00906858	0.016969	81.6853	-0.335562	0.134857	0.181541	60.3335
ENSMUSG00000003444	Med29	2.17308	2.26895	1.47202	3.23167	3.32735	1.36051	2.43598	2.35473	1.6124	1.91881	2.20873	2.52829	2.32751	2.55842	1.97559	2.29402	3.74784	2.82304	2.61884	2.88858	3.09808	3.02185	2.37953	2.90303	2.13552	2.21555	2.35485	2.27601	3.06324	3.00284	2.47269	9.37119	0.14258	0.823394	0.921052	14.9054	-1.14851	0.055775	0.116783	17.7871	-0.843172	0.06661	0.103849	10.8963	0.0231153	0.96926	0.976184	10.1657
ENSMUSG00000003452	Bicd1	6.36788	6.66335	5.76148	6.89851	6.67236	6.76459	6.60012	7.1321	6.92896	6.7017	6.51159	6.60367	6.56132	6.47393	6.46896	6.544	6.5449	6.5525	6.79349	6.55449	6.42936	6.49306	4.95725	5.36747	5.10978	6.6491	6.55886	6.49563	6.6303	6.4923	5.14483	191.215	0.0798343	0.607833	0.794051	174.055	0.04967	0.784825	0.858324	228.799	0.338929	0.0336208	0.0562862	131.953	2.38651	5.14487e-26	3.1721e-25	117.228
ENSMUSG00000003458	Ncstn	6.60335	7.13796	7.26294	7.57721	7.06007	6.81034	6.71514	7.08382	6.9683	7.1641	7.65799	7.58442	7.61377	7.33655	7.46602	7.44797	7.73831	7.75564	7.98596	7.79054	7.82406	7.80471	9.20184	9.436	9.37055	7.03832	7.61873	7.41685	7.82664	7.80644	9.33613	360.623	0.26536	0.0349577	0.125101	373.196	-0.137046	0.363792	0.505348	514.839	-0.00864509	0.945062	0.960115	1105.73	-1.98794	3.09247e-55	4.21416e-54	237.498
ENSMUSG00000003464	Pex19	5.13634	6.11194	5.23014	6.39579	5.30682	6.09384	5.58887	5.3026	5.35566	5.78387	6.54804	6.66733	6.58106	6.42577	6.27653	5.92453	6.93076	6.89045	7.04931	7.23705	7.31462	7.49362	6.4674	6.19754	6.5317	5.63059	6.59881	6.20894	6.95684	7.34843	6.39888	180.503	0.475679	0.00709435	0.0365738	215.326	-0.322527	0.0483961	0.103557	369.984	-0.752597	6.8122e-07	2.14563e-06	199.786	0.57782	0.00108897	0.00210924	129.851
ENSMUSG00000003469	Phyhip	8.64916	8.64656	9.02687	8.61015	8.50804	8.68186	8.8934	8.53146	8.58034	8.87336	9.57328	9.6383	9.58331	9.59074	9.71236	9.57191	9.1132	8.86597	8.87796	7.68484	7.55237	7.3735	6.88877	6.98891	6.83465	8.70012	9.5983	9.625	8.95237	7.5369	6.90411	1984.4	-0.0532954	0.550427	0.755977	1321.51	1.00861	8.32631e-15	1.22512e-13	1420.61	3.08384	1.27699e-99	7.18987e-98	1163.81	4.15645	6.90085e-208	1.19461e-205	931.2
ENSMUSG00000003476	Crhr2	-0.555329	0.501884	-0.355986	-0.275126	0.169011	-0.453048	0.0108402	-0.593395	0.185607	-0.659733	-0.737525	-0.742542	0.0999522	-0.700224	0.176204	0.544359	-0.573835	-0.711296	-0.678563	-0.222367	-0.712707	-0.112253	-0.698747	-0.361833	-0.0894206	-0.202528	-0.460038	0.0067797	-0.654565	-0.349109	-0.383334	2.95515	-1.77816	0.521521	0.73414	0.615949	2.04922	0.567467	NA	1.74724	-0.1149	0.949723	0.963412	1.39812	0.160665	0.937015	0.950415	1.40535
ENSMUSG00000003477	Inmt	-1.86273	-1.32746	-1.76266	-1.43637	-1.78479	-1.81139	-1.9648	-1.88184	-1.9141	-1.91909	-1.87359	-2.05954	-2.04259	-2.00069	-2.05151	-1.93422	-1.87202	-2.02882	-1.95392	-2.04427	-2.03269	-2.05254	-1.7115	-2.00565	-1.99687	-1.76652	-1.99191	-1.99547	-1.95159	-2.04317	-1.90467	0.101503	-0.0958564	0.981258	NA	0.0920011	-0.379878	0.925828	NA	0.132477	0.67431	0.868747	NA	0.331841	-0.69971	0.838954	NA	0
ENSMUSG00000003484	Cyp4f18	-1.12124	-1.20871	-0.878836	-0.780508	-0.93245	0.469524	-1.2971	-1.16753	-1.24566	-1.25367	-1.38797	-1.39745	-1.35048	-1.32488	-1.35758	-1.26796	-1.14374	-1.34241	-1.28671	-1.35144	-1.34471	-1.36238	0.512103	0.391287	0.073817	-0.941617	-1.37863	-1.31681	-1.25762	-1.35285	0.325736	0	NA	NA	NA	0	NA	NA	NA	0	NA	NA	NA	8.21766	-6.84365	4.62246e-07	1.21911e-06	0
ENSMUSG00000003500	Impdh1	5.38013	5.63648	6.43216	6.57564	5.82642	5.46761	5.82863	5.53191	5.73731	6.06396	6.49616	6.53356	6.42051	5.86267	5.86775	5.72686	6.32186	6.28015	6.05298	4.32743	4.5908	4.33809	4.53993	5.10009	4.9361	5.84802	6.48341	5.81909	6.21833	4.41877	4.85871	169.66	0.87834	2.22039e-07	3.56806e-06	169.675	0.514062	0.00525839	0.0155035	158.593	3.26723	6.48157e-45	1.07991e-43	145.248	2.58599	2.56413e-29	1.76696e-28	85.7906
ENSMUSG00000003505	Psg18	0	0	0	0	0	0	0	0	0	0	0	0	0	0	0	0	0	0	0	0	0	0	0	0	0	NA	NA	NA	NA	NA	NA	NA	NA	NA	NA	NA	NA	NA	NA	NA	NA	NA	NA	NA	NA	NA	NA	NA
ENSMUSG00000003518	Dusp3	5.76644	6.80592	6.75616	5.6973	7.14102	6.85715	7.04804	7.00638	7.18418	6.87186	7.4529	7.37396	7.32166	6.82397	6.89817	6.86375	6.82977	6.82552	6.27896	6.55332	6.85306	6.79652	6.94083	6.87308	7.04404	6.71344	7.38284	6.86196	6.64475	6.7343	6.95265	310.238	0.694649	2.34879e-07	3.75639e-06	252.349	1.13716	1.33756e-07	9.23985e-07	364.482	1.12748	1.18838e-12	5.63573e-12	333.612	0.89633	4.38219e-10	1.40253e-09	128.449
ENSMUSG00000003526	Prodh	5.23974	5.27167	3.95709	4.22224	4.80935	5.25834	5.10036	5.3401	5.37104	5.08825	3.07747	2.68335	2.80705	1.47431	2.08469	1.68117	3.05017	1.39534	3.23216	6.88656	6.7978	7.54219	3.69847	3.69932	3.27095	4.96582	2.85596	1.74672	2.55922	7.07552	3.55625	4.98803	2.85376	0.0128397	0.0586497	7.26548	0.476869	0.617213	0.735636	292.583	-5.60498	2.23838e-64	6.24758e-63	14.1361	-0.819723	0.11272	0.154891	2.52141
ENSMUSG00000003527	Ess2	3.34616	4.40325	2.37047	3.18008	3.27713	3.9939	3.39974	3.91228	2.33226	3.85631	4.64415	4.56871	4.53878	4.44407	4.30963	4.16368	4.64621	4.59697	4.51856	4.22307	4.01617	4.1603	4.59924	5.06136	4.76243	3.40716	4.58388	4.30579	4.58724	4.13318	4.80768	50.412	0.365822	0.192254	0.410481	49.0192	0.156651	0.580254	0.704831	57.0314	0.900633	0.000919803	0.00203586	65.0729	-0.0278849	0.915108	0.932572	29.799
ENSMUSG00000003528	Slc25a1	5.27124	5.43709	5.58932	6.27131	6.39689	5.39313	6.08	6.36586	5.96309	6.27404	4.88373	4.79134	4.7746	4.75109	4.71523	5.01209	5.20801	4.81701	4.27731	6.4916	6.44297	6.62257	6.46861	6.29501	6.3989	5.9042	4.81656	4.82614	4.76744	6.51905	6.38751	43.6816	0.000279557	0.999254	0.999674	37.1192	0.206392	0.587141	0.711166	154.218	-2.16062	1.00261e-27	9.39758e-27	117.188	-1.92002	1.13875e-20	5.89121e-20	25.9812
ENSMUSG00000003531	Dgcr6	3.01375	4.50838	4.91942	3.75026	4.54778	5.17982	4.06902	3.36185	3.91345	4.04529	4.50566	4.38393	4.45576	4.54672	4.34696	3.59941	4.69274	4.35403	4.42792	5.23927	5.49846	5.45414	4.00855	4.23367	4.09886	4.1309	4.44845	4.16436	4.49156	5.39729	4.11369	40.5948	0.251703	0.448114	0.679772	39.5434	0.123135	0.700829	0.799409	91.7349	-1.09392	1.59155e-06	4.82489e-06	39.8922	0.808495	0.0101035	0.0170864	24.6263
ENSMUSG00000003534	Ddr1	5.15403	5.97965	5.61394	6.61542	6.55255	6.86158	6.69351	6.45744	6.59862	6.40773	5.4823	5.50003	5.49189	5.00654	5.0609	5.07965	5.65325	5.6514	5.69435	7.65306	7.8524	7.91257	4.82253	4.89152	4.61144	6.29345	5.49141	5.04903	5.66633	7.80601	4.77516	63.8717	0.658796	0.00912197	0.0447292	72.9835	-0.0925656	0.692115	0.794073	422.166	-2.86534	9.02815e-71	2.91327e-69	60.7743	1.41253	2.37217e-07	6.39987e-07	41.6297
ENSMUSG00000003541	Ier3	2.369	0.997863	1.32369	1.42535	1.26835	2.64949	2.59366	1.60765	1.8365	1.46573	3.04505	2.92029	3.09936	1.18563	1.75646	1.4104	4.02354	3.43644	3.16693	2.96407	2.94567	2.92129	2.17837	2.25153	2.40766	1.75373	3.02157	1.45083	3.5423	2.94368	2.27919	12.741	2.88427	6.2376e-05	0.000615584	27.3145	-0.670436	0.109342	0.201	26.2503	0.359507	0.337195	0.42208	17.2492	1.5301	0.00194551	0.00365331	12.82
ENSMUSG00000003545	Fosb	0.379882	0.921762	0.613354	0.744204	0.542005	0.472685	2.03212	0.346459	2.2132	2.18348	2.7783	2.58613	2.58702	1.92538	1.70589	1.15531	0.363537	0.511404	0.229057	1.25021	0.771475	0.664247	0.601282	1.0961	0.602248	1.04491	2.65048	1.59553	0.367999	0.895309	0.766543	18.1169	1.56601	0.00186021	0.0120263	12.5385	5.47373	8.42401e-06	4.4757e-05	19.5285	3.44717	2.33248e-08	8.30638e-08	16.5397	3.88723	3.33626e-07	8.91386e-07	2.82421
ENSMUSG00000003546	Klc4	4.99013	4.51287	5.04387	3.5061	4.55228	5.17749	4.73534	4.90814	5.12347	4.9104	4.63809	4.62895	4.35815	3.67734	3.8962	4.28048	4.55608	4.85545	4.02708	4.78464	5.09511	5.11931	5.71255	5.50885	5.98088	4.74601	4.54173	3.95134	4.47954	4.99969	5.73409	33.9664	0.943045	0.00926989	0.0453413	37.2825	0.170712	0.659681	0.769162	67.0009	-0.404477	0.126748	0.183356	89.5168	-1.35884	6.20087e-08	1.73967e-07	19.575
ENSMUSG00000003549	Ercc1	3.47444	4.01588	2.55318	2.69152	4.284	4.48941	3.89839	3.81002	3.61531	4.1245	4.67627	4.5676	4.54743	4.63219	4.66504	4.5687	5.13248	4.78045	4.76124	5.01488	5.16464	4.97381	5.04357	4.96427	5.15024	3.69567	4.5971	4.62198	4.89139	5.05111	5.05269	52.8673	-0.0562099	0.834842	0.927202	52.0561	-0.238874	0.405978	0.549062	78.4632	-0.391433	0.0955865	0.143003	66.4666	-0.332029	0.172657	0.225211	36.6039
ENSMUSG00000003555	Cyp17a1	-2.3088	-2.3264	-2.12087	-2.24027	-2.27083	-2.28379	-2.35853	-2.31811	-2.33383	-2.33626	-2.4194	-2.41988	-2.39643	-2.37601	-2.40259	-2.34363	-2.31333	-2.38972	-2.35323	-2.39724	-2.3916	-2.40691	-2.37431	-2.37843	-2.37415	NA	NA	NA	NA	NA	NA	NA	NA	NA	NA	NA	NA	NA	NA	NA	NA	NA	NA	NA	NA	NA	NA	NA
ENSMUSG00000003559	As3mt	4.28515	4.61346	4.61894	4.10658	4.71546	4.29093	4.59414	4.78877	5.02979	4.84449	2.87415	2.91531	2.5254	3.40148	2.46644	3.24295	3.89602	3.51453	3.39008	6.03317	6.11165	6.27779	6.64972	6.6723	6.80496	4.58877	2.77162	3.03696	3.60021	6.14087	6.70899	8.00402	-0.491182	0.488421	0.711811	10.0531	-1.21321	0.0510751	0.108496	119.362	-4.70957	3.61696e-47	6.46853e-46	161.111	-5.35952	8.22546e-67	1.44294e-65	7.9711
ENSMUSG00000003573	Homer3	2.29957	4.1295	3.95506	4.83774	5.18156	4.72443	5.51395	3.91912	5.15009	5.51172	1.81488	2.04998	1.7603	5.05817	4.6229	4.85947	8.36993	8.36742	8.08223	4.85399	4.95605	4.91988	5.08389	5.0614	4.61657	4.52228	1.87506	4.84685	8.27319	4.90998	4.92062	30.3231	-6.09531	2.33066e-14	8.30423e-13	496.659	-10.2868	1.01984e-43	6.09171e-42	34.6352	-5.90944	6.03244e-14	3.1062e-13	29.6105	-5.89287	3.15217e-13	1.18624e-12	365.691
ENSMUSG00000003575	Crtc1	6.42007	6.82052	7.08312	6.62604	7.18223	5.79618	6.58238	6.03943	6.46699	6.40086	7.38008	7.19067	7.07968	7.50607	7.22911	6.89041	6.75838	6.61109	6.59316	5.73003	5.86567	5.64267	5.69881	5.62582	5.81195	6.54178	7.21681	7.20853	6.65421	5.74612	5.71219	359.534	-0.0398547	0.81301	0.915255	245.573	0.939331	3.1522e-07	2.05904e-06	278.561	2.31928	3.45218e-35	4.2191e-34	238.535	2.43569	4.28315e-36	3.58706e-35	171.317
ENSMUSG00000003581	Rnf215	3.33927	4.93254	4.14203	2.78992	5.39647	5.26325	4.55043	4.36611	4.22734	4.55689	3.96315	4.2297	4.09687	4.18927	3.41047	3.86123	4.50876	4.25349	4.03566	6.16167	6.27308	6.66606	5.23917	5.22528	5.45156	4.35643	4.09658	3.82032	4.26597	6.36694	5.30534	25.7522	0.401914	0.329208	0.572209	27.2637	-0.0707924	0.854832	0.904582	160.762	-2.90445	2.94548e-32	3.23428e-31	60.4325	-1.41871	1.35124e-07	3.70901e-07	16.846
ENSMUSG00000003585	Sec14l2	5.41998	5.92969	6.39689	5.8915	4.08798	5.55512	5.34466	5.54411	5.3948	5.45954	6.14115	5.98536	5.96724	6.25656	6.36683	6.27886	5.88167	5.44421	5.33919	7.86084	7.83212	8.1912	5.53588	5.40701	5.50342	5.50243	6.03125	6.30075	5.55502	7.96139	5.4821	154.092	-0.384779	0.0251799	0.0981277	95.1554	0.857875	0.000764733	0.00278613	514.594	-2.29156	1.54883e-41	2.2907e-40	111.067	1.09939	1.70539e-07	4.64711e-07	78.1068
ENSMUSG00000003604	Aven	1.29273	3.00782	1.54405	1.64959	3.40188	2.49134	2.49992	2.42118	2.25792	2.23319	2.7618	2.55379	2.68399	2.30766	2.837	1.13246	3.03371	2.88803	2.79511	2.90352	2.52627	3.26208	3.56191	3.74688	3.44101	2.27996	2.66653	2.09237	2.90562	2.89729	3.58326	10.6574	0.516103	0.42767	0.663076	13.0448	-0.237944	0.649483	0.761235	18.4142	-0.221782	0.638328	0.710133	23.9989	-1.16413	0.00336655	0.00610631	7.49233
ENSMUSG00000003617	Cp	5.65514	5.32232	6.27215	6.05296	5.52475	6.36178	5.38213	6.61695	5.73898	5.65836	3.37247	3.10425	2.9786	2.04088	2.67784	2.60328	2.43092	3.41766	3.86466	6.04234	6.33761	5.9905	7.30989	7.44376	7.15788	5.85855	3.15177	2.44067	3.23775	6.12349	7.30385	5.16004	1.9657	0.0471481	0.156383	7.86918	-0.22791	0.771595	0.849777	106.64	-4.18237	3.08897e-39	4.27067e-38	241.539	-5.61191	3.02831e-86	8.11309e-85	3.48154
ENSMUSG00000003623	Crot	7.12469	7.05896	6.66264	5.88745	6.2216	6.41191	6.84793	6.94424	6.75195	6.72656	5.29483	5.19833	5.38881	4.82035	4.90484	5.18216	6.04427	6.39237	6.06954	8.13011	7.98128	8.37515	7.44628	7.28844	7.48055	6.66379	5.29399	4.96912	6.16873	8.16218	7.40509	45.1342	0.543245	0.0735809	0.218011	77.5918	-1.19523	3.2209e-06	1.81792e-05	491.988	-3.73849	4.88259e-89	2.33791e-87	222.155	-2.69147	2.38017e-51	2.90883e-50	48.9252
ENSMUSG00000003644	Rps6ka1	4.70704	4.19618	4.248	6.00438	6.08552	5.54404	5.51021	5.66166	5.6269	5.50933	3.78729	4.06012	4.16832	3.59784	3.6567	4.16451	6.92637	6.24669	6.46601	4.46743	4.83417	4.70794	9.42469	9.42224	9.5712	5.30933	4.00524	3.80635	6.54635	4.66985	9.47271	17.1956	0.388458	0.424499	0.660375	107.601	-3.50629	6.43464e-29	2.16084e-27	34.1509	-0.808805	0.0219011	0.0380993	1321.51	-6.94582	2.52718e-274	9.04787e-272	73.9772
ENSMUSG00000003657	Calb2	5.17136	4.5436	4.80745	3.25584	5.7267	5.53469	6.26054	5.71374	5.76422	6.01016	3.75245	4.38264	3.45545	3.76569	4.76229	4.317	8.84279	8.39264	8.99072	6.66794	6.67882	5.61514	5.26848	5.0828	5.02711	5.27883	3.86351	4.28166	8.74205	6.32063	5.12613	22.7919	-0.675652	0.171086	0.38164	666.04	-6.31068	3.30889e-89	6.63527e-87	128.092	-3.33579	1.85254e-07	6.10248e-07	38.541	-1.48535	0.000229605	0.000480661	468.759
ENSMUSG00000003660	Snrnp200	9.88417	9.24816	9.51099	9.05158	9.14863	8.67234	9.44053	9.50584	9.14279	9.32301	9.04525	8.94797	8.93813	8.89795	9.05994	8.9541	8.40501	8.22408	7.96434	8.29468	8.25934	8.57364	8.96145	8.77086	9.00039	9.2928	8.97711	8.97066	8.19781	8.37589	8.9109	1024.49	-0.00944215	0.925786	0.972409	657.829	1.24825	2.85338e-13	3.62142e-12	981.842	1.07516	2.94348e-13	1.45376e-12	1016.58	0.398787	0.00155503	0.00295636	454.034
ENSMUSG00000003662	Ciao1	7.31759	6.02837	6.76979	6.44436	6.26213	6.40816	6.91826	6.81355	6.58351	6.8467	5.93139	5.95429	5.76409	5.90298	5.81048	5.75594	5.9123	5.56425	4.77758	5.11357	5.26129	5.55111	6.04411	6.07824	5.744	6.63924	5.88326	5.82314	5.41804	5.30865	5.95545	109.799	0.0780625	0.694621	0.850188	82.1231	0.74604	0.0328429	0.0754526	108.254	1.07354	4.2365e-06	1.23502e-05	119.149	0.206787	0.327934	0.393565	54.8753
ENSMUSG00000003665	Has1	-0.34027	0.462089	-0.126019	-0.0391114	0.438241	-0.23034	-0.440602	-0.381182	0.0801368	0.630839	0.343653	0.0102814	0.174973	-0.122102	-0.0257862	0.334981	0.195964	0.802997	-0.0191374	-0.476369	-0.471938	0.10891	-0.114922	-0.460581	-0.456577	0.00537812	0.176302	0.0623642	0.326608	-0.279799	-0.344026	2.8588	0.392895	0.732395	0.87076	3.35696	-0.572439	0.590769	0.714758	2.52792	1.98306	0.155103	0.218944	1.99417	2.97046	0.0690117	0.100142	2.15064
ENSMUSG00000003680	Taf6l	4.55562	4.44979	3.21637	2.78579	3.76683	4.54771	4.80089	4.74379	4.34788	4.48856	4.40221	4.40741	4.47098	4.46116	4.36171	4.15142	4.63158	4.38776	3.88772	5.29933	5.06876	5.05195	5.95384	5.76195	5.86651	4.17032	4.42687	4.32476	4.30235	5.14002	5.86077	39.5157	0.105881	0.733844	0.871324	33.9799	0.321418	0.379646	0.521795	73.2027	-0.785021	0.00148172	0.00316919	98.6318	-1.69285	4.65994e-15	1.89881e-14	22.3633
ENSMUSG00000003721	Insig2	4.30728	4.0982	5.44189	6.0248	4.65418	5.66309	5.09977	5.02139	5.15724	5.15983	5.23629	5.39472	5.64712	5.36791	5.44185	5.56504	6.1295	6.10512	6.54637	5.86754	5.98502	5.63076	5.1447	5.57656	5.26827	5.06277	5.42605	5.45827	6.26033	5.82777	5.32984	88.693	-0.0505327	0.825036	0.921802	118.241	-1.01277	7.0594e-05	0.000322673	127.382	-0.319361	0.162558	0.228107	85.5001	0.431428	0.0943429	0.132553	82.8698
ENSMUSG00000003731	Kpna6	8.32541	7.84011	7.18182	8.08096	8.1734	7.52783	8.0197	7.75309	7.81351	7.88766	7.42826	7.52057	7.41334	7.54652	7.57382	7.68595	7.34506	7.34926	7.1914	7.09499	6.86934	7.0479	7.2379	7.33159	7.20867	7.86035	7.45406	7.6021	7.29524	7.00407	7.25939	371.822	-0.208804	0.095971	0.26004	274.729	0.381066	0.013943	0.0362969	345.728	0.879106	1.16568e-08	4.23336e-08	323.927	0.58544	3.01304e-05	6.87193e-05	206.965
ENSMUSG00000003746	Man1a	6.29002	6.41749	6.99187	6.74259	6.83298	6.08478	5.99238	5.98051	6.0517	6.38902	6.40706	6.58267	6.58939	8.67637	8.55646	8.88096	6.75373	6.98562	7.31817	6.71099	6.77153	6.11635	8.95567	9.08913	9.04734	6.37733	6.52637	8.7046	7.01917	6.53296	9.03071	681.723	-2.92861	3.37632e-109	5.02771e-106	176.993	-0.580791	0.00950798	0.026062	193.339	0.191177	0.432154	0.518267	806.665	-3.00971	1.83392e-121	9.34942e-120	445.689
ENSMUSG00000003752	Itpkc	3.11687	4.07072	3.70725	2.17649	4.22043	2.49827	3.63532	2.80031	3.9682	3.2448	3.66743	3.36399	3.30884	3.46547	3.07591	3.62611	3.39615	3.44281	3.57361	2.88652	3.37024	2.90708	4.3698	4.42982	4.44569	3.34387	3.44676	3.38916	3.47086	3.05461	4.4151	21.4668	0.120179	0.782056	0.898201	18.9057	0.136801	0.763754	0.843561	22.0472	0.896947	0.0424496	0.0694367	39.3126	-1.10718	0.00054068	0.00108639	12.7914
ENSMUSG00000003762	Coq8b	4.11806	3.17277	1.95664	4.45191	4.66085	3.11427	3.21249	2.73117	3.21231	3.18236	3.69153	3.4804	3.3875	3.22149	2.95684	2.82365	2.16194	2.91213	2.71592	3.37685	3.53458	3.25219	4.09096	3.75242	3.68344	3.38128	3.51981	3.00066	2.59666	3.38788	3.84227	19.6401	0.815428	0.0728808	0.216478	14.7803	1.57351	0.00628326	0.0180994	28.3174	0.472045	0.206025	0.278383	30.4636	-0.181608	0.616396	0.674218	6.75808
ENSMUSG00000003778	Brd8	6.23749	6.67726	7.0321	6.37885	6.48491	6.7317	6.26817	6.16095	6.50876	6.17906	7.02315	7.09305	7.0233	6.72062	6.80568	6.84009	7.02399	7.32906	7.50463	7.04974	6.90212	6.85729	7.27423	7.20652	7.19067	6.46593	7.0465	6.7888	7.28589	6.93639	7.22381	251.327	0.344905	0.015138	0.0670897	271.461	-0.204486	0.265067	0.399909	322.212	0.396726	0.00897318	0.0168059	309.9	0.0726819	0.594563	0.653239	169.446
ENSMUSG00000003779	Kif20a	-0.157635	-0.221266	0.155416	2.98824	0.0861754	0.00298881	-0.327363	1.57576	-0.246608	0.412122	0.240998	0.437078	0.0058773	-0.38031	0.262992	0.760011	-0.175887	0.363077	-0.310575	0.000996761	0.586676	0.451666	2.82977	1.22947	1.52481	0.426783	0.227984	0.214231	-0.0411282	0.346446	1.86135	1.96637	-0.043835	0.974966	0.99112	1.12721	0.981662	0.594441	NA	2.45868	-0.0483841	0.967272	0.976181	10.6534	-3.14836	0.000215298	0.00045185	0.866619
ENSMUSG00000003808	Farsa	5.77538	5.25296	5.47366	5.00254	5.24097	5.20945	5.44856	5.40878	5.14718	5.71647	5.26477	5.09537	4.94363	5.55302	5.20583	4.72423	5.44142	5.14169	4.87596	4.87704	4.69959	4.81588	5.78195	5.80932	5.81878	5.36759	5.10126	5.16103	5.15302	4.7975	5.80335	69.6337	-0.182833	0.503862	0.722972	58.2319	0.104651	0.728053	0.819213	69.1044	0.715423	0.0057955	0.0112373	96.3233	-0.656118	0.00257682	0.00475658	42.6176
ENSMUSG00000003809	Gcdh	6.31784	5.52264	6.09396	4.09455	5.78826	5.25323	6.06242	5.99392	5.35462	5.6968	4.75362	4.6586	4.39235	4.39049	4.49726	4.23528	5.21213	4.35546	4.24617	5.73688	5.81384	6.05618	5.13644	5.09742	5.03154	5.61782	4.60152	4.37434	4.60459	5.86896	5.08846	36.0322	0.344415	0.305041	0.546605	36.1199	0.139332	0.744518	0.829691	103.954	-1.5377	9.69481e-11	4.06306e-10	52.9929	-0.375626	0.177822	0.230953	22.2446
ENSMUSG00000003810	Mast2	6.76401	6.55464	6.23418	7.00918	6.63462	6.8085	6.28803	6.18313	6.62536	6.56393	6.23408	6.18374	6.14818	5.98435	6.06489	6.16164	6.03156	5.98479	5.79736	5.79742	5.9087	5.68969	5.57275	5.71828	5.44738	6.56656	6.18866	6.07029	5.9379	5.7986	5.57947	139.38	0.161431	0.3643	0.605076	112.821	0.517088	0.0126718	0.0334728	150.496	0.804667	2.01952e-05	5.47674e-05	119.406	1.18331	8.30037e-09	2.46013e-08	73.3646
ENSMUSG00000003812	Dnase2a	1.29457	2.47629	1.67184	1.82127	4.04067	3.50388	2.30837	3.03036	2.98797	2.59038	1.59272	0.945048	1.08904	0.788214	1.34184	1.02713	3.79227	1.92882	2.72581	4.9037	5.10398	5.44021	6.8848	7.29538	7.36253	2.57256	1.20894	1.0524	2.81563	5.1493	7.1809	1.16965	1.09048	0.553752	NA	7.5195	-2.98266	0.00246384	0.00793596	64.3981	-5.788	1.35026e-23	1.06972e-22	293.605	-8.19715	2.53654e-51	3.09512e-50	4.9333
ENSMUSG00000003813	Rad23a	4.84332	5.77238	6.00314	6.08032	5.65317	6.14551	5.55705	5.09346	5.24697	4.97814	6.60932	6.59448	6.62832	6.54448	6.2628	6.3762	7.20225	7.03026	7.07919	6.73144	6.98106	7.01391	7.15923	7.07251	7.20912	5.53734	6.6107	6.3945	7.1039	6.9088	7.14695	193.041	0.279538	0.0832616	0.238074	231.338	-0.495573	0.00136798	0.00468465	291.881	-0.16407	0.302031	0.383899	278.153	-0.409606	0.00352428	0.00637405	148.911
ENSMUSG00000003814	Calr	10.5436	10.0982	10.6046	10.3065	10.3329	9.59153	10.3016	10.8927	10.1364	10.6667	10.3583	10.3819	10.371	10.5101	10.4637	10.5412	10.9783	10.9998	11.2402	10.955	10.9846	10.9482	11.9693	12.081	12.107	10.3475	10.3704	10.505	11.0728	10.9626	12.0524	2587.18	-0.200763	0.0121557	0.0562731	2993.5	-0.811317	3.62832e-10	3.43894e-09	3886.69	-0.564359	6.71347e-09	2.48003e-08	6525.55	-1.92507	1.62543e-97	5.24702e-96	2186.21
ENSMUSG00000003824	Syce2	1.05713	0.919064	0.60311	0.738894	0.529071	0.453216	1.2912	0.313389	0.252044	1.23141	0.644397	0.562638	0.720236	1.62548	0.673914	0.2151	0.332494	1.47504	1.88669	1.88077	1.68105	1.02059	3.23121	3.10828	3.23351	0.738853	0.642424	0.838164	1.23141	1.52747	3.191	2.61433	-0.986334	0.421287	0.657822	3.28679	-1.71451	0.126999	0.22695	5.50346	-1.88024	0.034957	0.0583379	21.4733	-4.35032	4.13195e-12	1.47431e-11	2.7663
ENSMUSG00000003847	Nfat5	7.05733	7.34203	7.8829	7.59019	7.3682	7.73611	6.57407	6.54251	7.07892	6.81992	7.4871	7.58943	7.50084	7.5804	7.6512	7.86185	6.96118	7.38587	7.4576	7.54942	7.52175	7.32768	6.79781	6.82925	6.79277	7.19922	7.52579	7.69782	7.26822	7.46628	6.80661	429.71	-0.240568	0.0601196	0.187368	303.684	0.461194	0.0141928	0.0368593	459.615	0.326389	0.0267187	0.0456056	310.551	1.31789	4.1278e-20	2.08281e-19	232.65
ENSMUSG00000003848	Nob1	5.02945	4.94132	5.19603	4.11508	5.63089	4.7721	5.00666	5.00713	5.234	5.35386	5.44524	5.41151	5.57532	5.59075	5.3683	5.86951	5.831	5.20407	5.26773	5.0172	5.11369	4.64868	5.47438	5.3034	4.89608	5.02865	5.47735	5.60952	5.43427	4.92652	5.22462	104.57	-0.194315	0.367859	0.608723	82.4526	0.222761	0.422875	0.564364	93.9931	1.02007	3.32744e-05	8.83421e-05	89.6822	0.628994	0.0117894	0.0197048	61.9813
ENSMUSG00000003849	Nqo1	3.51934	3.67602	1.66519	3.12143	3.5744	2.1913	3.31036	3.12448	3.06134	3.36156	2.53568	2.17044	2.17982	2.6464	1.9835	1.99742	3.5726	2.48064	2.15665	5.07057	4.78741	5.32909	1.70524	1.66789	2.29309	3.06054	2.29531	2.20911	2.73663	5.06236	1.88874	7.07789	0.12256	0.867533	0.944925	9.46098	-0.724995	0.326488	0.467882	73.6075	-3.82348	1.19375e-26	1.06548e-25	6.08408	1.14674	0.159697	0.210256	6.38692
ENSMUSG00000003863	Ppfia3	7.64442	7.6667	7.0409	6.85806	7.12419	7.34388	7.73137	7.25563	7.29439	7.24916	7.84069	7.68763	7.71603	7.7213	7.53757	7.26715	6.78663	6.3892	6.16054	5.59172	5.50975	5.37809	5.23526	5.78157	5.4397	7.32087	7.74812	7.50867	6.44546	5.49319	5.48551	485.75	0.271515	0.048747	0.159978	305.901	1.93415	3.21447e-20	6.64529e-19	379.209	3.46347	1.2055e-82	5.06002e-81	328.087	3.50138	6.55168e-66	1.13167e-64	180.584
ENSMUSG00000003865	Gys1	5.71739	5.94174	4.76503	4.52152	5.43248	5.36348	5.7981	5.90603	5.25107	5.78965	4.1441	4.0755	4.14459	3.86467	3.95611	3.9853	4.81972	4.63989	3.34766	5.88412	6.02868	6.61528	4.54414	4.41992	4.6411	5.44865	4.1214	3.93536	4.26909	6.17602	4.53505	23.6686	0.304417	0.443933	0.676166	26.5481	-0.292332	0.572132	0.697742	129.841	-2.73294	6.43962e-22	4.78589e-21	33.3505	-0.328882	0.317331	0.382531	16.8639
ENSMUSG00000003868	Ruvbl2	4.93383	5.72295	5.81148	5.80703	5.71654	5.34203	4.90481	5.73083	5.34671	5.40881	5.37451	5.52229	5.53095	5.52903	5.55246	5.10561	6.04384	5.67448	5.28463	5.98905	6.10449	5.92537	6.6211	6.66773	6.48	5.4725	5.47592	5.3957	5.66765	6.0063	6.58961	81.6376	0.0430613	0.853959	0.937864	80.6684	-0.137408	0.629943	0.746015	132.018	-0.499975	0.0108343	0.0199281	158.406	-1.22952	1.00341e-11	3.50636e-11	54.4126
ENSMUSG00000003872	Lin7b	4.35101	4.02086	5.70906	2.83483	4.77531	4.9574	3.99415	4.02489	4.10275	3.55858	6.32981	6.24234	6.40099	6.34434	6.16303	5.91133	4.9663	5.03714	4.65432	4.32516	4.12073	4.10774	3.23215	3.60609	3.65928	4.23288	6.32438	6.13957	4.88592	4.18454	3.49918	222.427	0.186744	0.24355	0.4786	133.333	2.05607	3.45188e-19	6.74846e-18	172.289	3.19672	1.82607e-46	3.19915e-45	141.241	4.36635	3.22675e-45	3.3574e-44	81.6111
ENSMUSG00000003873	Bax	1.6452	1.54511	1.94376	2.06913	3.71659	3.11541	3.21431	2.46047	3.0834	2.73558	3.61655	3.738	3.25141	3.61821	3.35272	3.64784	3.33697	3.38763	3.93182	3.91974	4.07733	4.24921	4.59978	4.59703	4.19359	2.5529	3.53532	3.53959	3.55214	4.0821	4.46347	25.786	0.0427307	0.913707	0.96795	22.4431	0.113012	0.803896	0.870112	41.2167	-0.520624	0.111285	0.16314	44.3733	-1.00793	0.00198393	0.0037197	15.5325
ENSMUSG00000003882	Il7r	-0.40881	-0.549114	-0.0200123	0.137698	-0.106007	-0.209322	-0.801896	0.518775	-0.608366	0.325866	-1.30319	-1.37653	-1.05906	-0.92009	-1.10094	-0.686559	-0.444906	-0.233467	-0.763104	-1.06462	-1.02622	-1.13024	6.77094	7.16893	7.08526	-0.172119	-1.24626	-0.902531	-0.480492	-1.07369	7.00838	0	NA	NA	NA	0.152475	-2.24404	0.581531	NA	0	NA	NA	NA	90.5426	-10.3064	6.86831e-18	3.17571e-17	0.106445
ENSMUSG00000003923	Tfam	5.06801	5.4803	5.87344	5.69062	5.26952	5.0965	5.0052	5.1209	4.91295	4.77218	5.91813	6.03825	6.0746	6.30346	6.40372	6.57793	6.4357	6.4084	6.86226	6.53672	6.21329	6.2296	6.46226	6.33872	6.1527	5.22896	6.01033	6.42837	6.56878	6.32654	6.31789	167.602	-0.583689	0.000592924	0.00451498	153.755	-0.633346	0.0041956	0.0126953	187.091	-0.201536	0.294652	0.375836	157.621	-0.122978	0.508685	0.573691	127.431
ENSMUSG00000003929	Zfp81	4.92874	4.93384	5.75491	5.47427	5.84149	3.50683	5.29783	5.58644	4.78359	4.95902	4.63682	4.57846	4.89744	4.98019	5.36129	5.3624	4.05902	4.76389	5.06836	4.85099	4.87675	4.46094	4.68555	4.41021	4.39622	5.10669	4.70424	5.23462	4.63042	4.72956	4.49733	67.386	-0.802254	0.00186731	0.0120664	42.1415	0.108303	0.771434	0.84977	60.3406	0.190717	0.507739	0.589998	46.1003	0.610162	0.0470129	0.0706607	40.1316
ENSMUSG00000003934	Efnb3	4.23865	5.50795	5.65582	6.46489	5.81517	6.13165	5.33492	5.06731	5.25078	5.97948	4.66171	4.66885	4.30641	5.75989	5.47795	5.35489	3.63224	3.69755	3.34453	5.02965	5.11197	4.63568	3.82441	4.09915	4.5468	5.54466	4.54565	5.53091	3.55811	4.92577	4.15679	76.5161	-1.40294	1.74182e-08	3.2925e-07	24.0895	1.82184	0.000124372	0.000538829	61.0278	-0.293827	0.318028	0.401234	36.4116	0.88993	0.0174143	0.0283192	38.0145
ENSMUSG00000003948	Mmd	4.48617	4.3805	5.33594	5.09036	4.41373	4.67261	5.11064	4.01547	4.14361	5.06103	4.32035	4.40143	4.93242	5.28146	5.37301	5.06733	3.20262	3.29296	3.47258	4.1006	3.81707	4.0837	3.47716	3.56602	3.55154	4.67101	4.5514	5.2406	3.32272	4.00046	3.53157	75.8566	-0.994353	0.00014877	0.00134174	28.5481	2.15018	1.0037e-05	5.25705e-05	49.4775	1.08276	0.00135515	0.00292105	36.8641	1.93192	1.40749e-06	3.57904e-06	34.3624
ENSMUSG00000003949	Hlf	6.8333	7.1736	5.99853	6.76184	7.16136	6.82438	6.72517	6.2136	6.78298	6.90822	8.06127	7.98794	8.0038	7.44976	7.46262	7.65337	8.21602	7.91951	7.89821	8.41793	8.46253	8.52159	6.44319	6.48238	6.41464	6.7383	8.01767	7.52192	8.01125	8.46735	6.44674	504.015	0.65655	2.86252e-08	5.19831e-07	527.32	0.16882	0.265335	0.400011	906.737	-0.337939	0.00328019	0.00662531	408.879	2.50037	1.37249e-66	2.40232e-65	296.114
ENSMUSG00000003955	Fam162a	5.20919	5.28184	6.11935	6.02375	5.03676	5.34074	5.08295	5.34877	5.34367	4.96109	5.99251	5.99139	5.79406	6.49521	6.29224	6.42919	7.03935	6.98476	7.12637	7.4475	7.6333	7.54073	6.39644	6.19473	6.18163	5.37481	5.92599	6.40555	7.05016	7.54051	6.2576	150.043	-0.662481	0.000189631	0.00166761	186.797	-1.35733	2.27883e-14	3.22459e-13	358.679	-1.90401	8.66938e-34	1.00464e-32	137.725	-0.143471	0.460013	0.526258	151.153
ENSMUSG00000003970	Rpl8	7.03157	7.27376	6.95857	7.70504	6.87391	7.37817	6.72168	6.14575	6.58193	6.76453	7.74652	7.86251	7.71602	7.7705	7.59999	7.43541	7.86402	8.00729	7.71014	8.09456	8.23182	8.37564	9.01042	8.8912	8.85986	6.94349	7.77502	7.60197	7.86048	8.23401	8.92049	424.917	0.207172	0.120594	0.303454	407.331	0.0314683	0.84271	0.896893	682.086	-0.370011	0.00916444	0.0171288	849.427	-1.19359	1.44519e-22	7.94348e-22	261.984
ENSMUSG00000003974	Grm3	8.66738	8.50969	7.57961	8.34525	8.24288	8.46291	8.0761	8.65005	8.12448	8.38336	8.42543	8.37693	8.45377	6.90878	6.97082	7.14999	7.20028	7.4891	7.55465	10.5734	10.514	10.5508	6.40725	6.86846	6.60728	8.30417	8.41871	7.00987	7.41468	10.546	6.62766	461.844	1.99752	6.87805e-53	1.73924e-50	447.121	1.51637	3.87466e-22	9.03465e-21	3140.64	-2.47143	1.08936e-124	9.02896e-123	472.956	2.8785	1.87681e-62	3.02304e-61	137.532
ENSMUSG00000003992	Ssbp2	6.60771	6.66284	6.6946	7.0605	7.08468	7.25396	6.5646	6.82936	6.98153	6.83877	7.1635	7.12745	7.19902	6.65694	6.82473	6.87435	6.98517	7.17834	6.96517	7.19334	7.1761	7.15226	6.06449	6.1058	6.56713	6.85785	7.16332	6.78534	7.04289	7.1739	6.24581	263.934	0.504201	0.000414929	0.00330415	251.947	0.299393	0.0615967	0.126723	373.051	0.23196	0.0877077	0.13238	233.692	1.57127	2.61411e-15	1.07408e-14	145.898
ENSMUSG00000004018	Fancl	3.65075	4.12953	2.79423	3.43634	4.0039	4.1043	3.69483	4.02745	4.30931	3.18096	3.23219	3.46879	3.46173	4.08284	3.89718	3.89373	2.31861	3.23577	2.6912	3.45124	3.01419	3.56204	4.45174	4.20519	4.47853	3.73316	3.38757	3.95791	2.74853	3.34249	4.37848	27.3489	-0.90899	0.0145251	0.0647157	12.2383	1.06478	0.0868812	0.167199	22.5588	0.277605	0.511133	0.592909	35.4775	-1.20058	0.000341514	0.000701509	13.5204
ENSMUSG00000004031	Brinp2	6.72428	7.02817	6.22698	6.9095	6.78646	6.69069	6.65258	6.37011	6.51041	6.9504	6.94908	6.89707	6.8947	6.46988	6.30177	6.24912	6.80766	6.42967	6.31226	5.80934	5.85791	5.29809	4.7413	5.14994	4.9525	6.68496	6.91361	6.34025	6.51653	5.65511	4.94792	222.908	0.757149	6.99314e-07	1.02653e-05	206.519	0.703109	0.000376419	0.00146204	229.433	1.98065	2.30751e-20	1.5992e-19	176.15	3.16847	5.1136e-46	5.46503e-45	106.866
ENSMUSG00000004032	Gstm5	8.96677	8.55662	8.13236	8.23792	8.4408	7.99956	9.02657	9.01824	8.66264	8.90805	7.6682	7.72144	7.79072	7.74984	7.84491	7.99718	7.89639	7.80469	7.57337	10.2528	10.2353	10.6973	7.43655	7.35843	7.54298	8.59495	7.72679	7.86398	7.75815	10.3951	7.44599	382.062	-0.208693	0.107663	0.280884	308.384	0.110272	0.504993	0.638727	2509.18	-3.30793	6.35547e-87	2.87457e-85	321.034	0.719738	5.77083e-07	1.51085e-06	230.716
ENSMUSG00000004035	Gstm7	4.12756	3.67936	5.58138	4.67225	3.90292	4.35399	5.05854	5.19208	5.05743	5.16888	3.25112	3.68093	3.4524	4.94294	5.00651	4.8482	4.06751	3.53525	3.46023	4.53505	4.90387	4.75487	3.94267	3.25479	3.46694	4.67944	3.46148	4.93255	3.68766	4.73126	3.5548	45.2815	-2.21938	3.30797e-12	9.6168e-11	15.6943	-0.148583	0.775575	0.851858	43.9243	-1.67417	6.5606e-07	2.06958e-06	17.2944	0.136635	0.782753	0.820242	28.9508
ENSMUSG00000004038	Gstm3	-1.96163	-1.97518	-1.92408	-1.90885	-1.93239	-1.94236	-1.78554	-1.9688	-1.9809	-1.98278	-2.03287	-2.03309	-1.92311	-2.01339	-2.03208	-1.98845	-1.96512	-2.02395	-1.99585	-2.02974	-2.0254	-1.93721	-2.01208	-2.01525	-2.01196	-1.93625	-1.99635	-2.01131	-1.99497	-1.99745	-2.0131	0.170828	-0.0958564	0.981258	NA	0.153987	-0.379878	0.925828	NA	0.382881	-0.28748	0.930337	NA	0.192188	0.26208	0.948789	NA	0
ENSMUSG00000004040	Stat3	6.50241	6.78455	6.21501	6.37233	6.11944	6.25498	6.52277	6.07122	6.1007	6.48289	6.38597	6.3177	6.45565	6.19449	5.77163	6.16223	6.89698	6.63661	6.14601	8.07298	7.89054	8.14899	8.58052	8.39265	8.66828	6.34263	6.38644	6.04278	6.55987	8.0375	8.54715	128.441	0.491572	0.0152671	0.0675282	141.762	-0.12507	0.625531	0.74223	480.816	-1.98826	2.0305e-39	2.82883e-38	584.98	-2.57623	4.62137e-71	8.93256e-70	85.3791
ENSMUSG00000004043	Stat5a	0.328212	0.243938	0.610758	0.755254	2.62599	0.449003	1.90236	2.03268	0.874067	0.853925	0.163143	0.528753	-0.061744	0.0203097	-0.0850598	0.163245	0.306413	-0.0355787	1.10417	2.42367	2.9069	2.89155	3.33733	3.61713	3.46549	1.06762	0.21005	0.0328317	0.458334	2.74071	3.47331	0.362199	1.50956	0.626373	NA	0.844898	-0.658314	0.777367	NA	14.5824	-4.65373	8.53164e-08	2.89795e-07	23.9077	-5.58053	6.67928e-12	2.35811e-11	0.359308
ENSMUSG00000004044	Cavin1	3.48314	4.27887	4.96202	3.58437	3.99755	4.36801	3.24589	2.6567	3.15842	3.35409	3.48219	3.28199	3.19879	1.15156	1.96321	1.32089	1.49774	2.48326	2.47543	4.05528	4.46041	4.70531	2.77017	2.72064	2.87063	3.70891	3.32099	1.47855	2.15215	4.407	2.78715	11.2606	3.64245	4.99524e-05	0.000503734	11.7059	1.96298	0.00369707	0.0113558	49.2655	-1.34744	3.95871e-05	0.000104204	17.291	1.19986	0.0126079	0.0209817	1.85531
ENSMUSG00000004054	Map3k11	4.49479	3.71826	2.04643	4.82925	3.98221	4.30991	4.08382	2.18468	3.79091	4.15574	2.60832	2.21914	2.43845	3.07363	2.96712	2.89812	2.58817	2.62448	2.78647	3.46093	4.11389	4.10746	5.2967	5.15767	4.71554	3.7596	2.42197	2.97962	2.66637	3.8941	5.05663	9.35458	-1.00936	0.106654	0.279169	6.1044	-0.236692	0.755188	0.837733	23.2114	-2.24037	3.26556e-06	9.61762e-06	51.7062	-3.77776	3.76912e-21	1.97851e-20	6.13083
ENSMUSG00000004056	Akt2	5.23429	5.37978	4.24282	4.49739	5.60166	5.46101	4.84395	5.18283	4.95275	5.26242	4.61517	4.63773	4.36839	3.89121	3.84471	3.76645	3.15036	3.46425	3.91384	6.71307	6.95996	7.46113	4.55548	5.19441	5.006	5.06589	4.54043	3.83412	3.50948	7.04472	4.91863	30.8182	1.10678	0.00291754	0.0175026	24.467	1.75202	0.000193772	0.000802826	271.535	-3.13895	4.78682e-36	5.9938e-35	52.461	-0.256176	0.40366	0.470643	9.8162
ENSMUSG00000004069	Dnaja3	7.36302	7.05651	6.80825	7.26308	7.58718	7.07526	7.41194	7.49688	7.26987	7.42233	6.78269	6.73019	6.61286	6.77652	6.918	6.9869	7.07507	6.91003	6.75423	6.56764	6.59663	6.90607	6.80777	6.99444	6.99093	7.27543	6.70858	6.8938	6.91311	6.69011	6.93105	212.986	-0.269471	0.0823526	0.236184	182.748	-0.121925	0.514496	0.647014	229.433	0.266961	0.149835	0.212462	217.982	-0.00198295	0.99034	0.992545	139.2
ENSMUSG00000004070	Hmox2	5.64606	6.71456	7.36677	6.90455	6.98347	6.3783	6.53049	6.481	6.3859	6.60529	7.48801	7.47447	7.56365	7.50733	7.56517	7.63058	7.874	7.94015	7.86648	7.33382	7.18958	7.17901	8.72728	8.60268	8.72436	6.59964	7.50871	7.56769	7.89354	7.23414	8.68477	397.073	-0.0936223	0.437883	0.67207	395.981	-0.365636	0.00489025	0.0145433	412.946	0.619721	1.30177e-05	3.60809e-05	727.944	-1.23727	9.62461e-27	6.08169e-26	282.12
ENSMUSG00000004071	Cdip1	7.19764	7.11737	7.32998	6.8584	6.71153	7.27521	7.14554	6.38011	7.08141	6.92944	8.4402	8.43629	8.47047	8.42336	8.40003	8.3646	8.59081	8.89339	8.56005	8.62038	8.73576	8.44633	7.34458	7.32333	7.09221	7.00266	8.44899	8.396	8.68142	8.60082	7.25337	807.376	0.0522869	0.58893	0.78057	786.873	-0.167746	0.263603	0.398171	1057.78	0.0407519	0.764363	0.818449	586.432	1.9381	1.91824e-45	2.00784e-44	534.527
ENSMUSG00000004085	Map3k20	2.9623	4.47839	4.66669	3.70673	4.38817	4.89317	4.23535	4.59582	4.53405	4.39585	3.0064	3.06043	3.25115	3.4986	3.64708	3.19004	4.60344	4.83678	5.23291	4.50099	4.42476	4.27821	5.79309	5.36024	5.26106	4.28565	3.10599	3.44524	4.89104	4.40132	5.47147	13.1849	-0.672069	0.20309	0.425948	34.6606	-2.70643	1.32629e-11	1.46592e-10	31.1412	-1.8603	8.04964e-07	2.51742e-06	63.7674	-3.31913	2.64158e-22	1.4401e-21	25.8113
ENSMUSG00000004096	Cwc15	5.42132	6.04025	6.65391	5.64824	5.14465	6.19317	5.7154	5.24552	5.68268	5.58493	6.80294	6.758	6.93152	7.14578	6.97655	6.92145	7.37824	7.28196	7.64901	7.92612	7.75883	7.78711	7.99506	7.83708	7.89299	5.73301	6.83082	7.01459	7.4364	7.82402	7.90838	257.992	-0.278545	0.0559537	0.177362	274.072	-0.671914	0.000220996	0.000903343	474.099	-1.08076	6.84515e-14	3.52024e-13	420.04	-1.12604	1.51159e-16	6.5761e-16	204.518
ENSMUSG00000004098	Col5a3	-0.605453	0.0497169	0.558466	-0.181038	1.35394	-0.450531	-0.79327	-0.66311	-0.721921	0.698649	-0.96717	-0.987326	-0.890253	-0.288722	-0.904518	-0.751758	-0.633484	-0.874204	-0.778673	1.67845	1.8232	1.62139	-0.83541	-0.304003	-0.834996	-0.075455	-0.94825	-0.648333	-0.76212	1.70768	-0.658137	0.231659	-2.06101	0.612854	NA	0	NA	NA	NA	18.162	-7.77714	5.92189e-10	2.35434e-09	0.201935	-1.6615	0.683878	NA	0.14232
ENSMUSG00000004099	Dnmt1	7.12847	7.27959	6.36191	6.54073	6.95908	7.3046	7.17343	6.89657	6.99171	7.23302	7.01484	7.06272	6.93	6.69743	6.72177	6.68709	6.15578	6.19838	6.08691	6.12718	5.96675	5.90522	7.37967	7.14702	7.12265	6.98691	7.00252	6.70209	6.14702	5.99972	7.21645	240.274	0.403252	0.00542682	0.0294097	171.396	1.36685	3.09386e-13	3.91248e-12	234.247	1.67556	1.35463e-21	9.91408e-21	307.711	0.0188778	0.903658	0.922754	97.3085
ENSMUSG00000004100	Ppan	3.45335	3.63256	3.62353	4.65573	2.21478	3.57273	3.50417	3.93994	3.9002	4.30496	4.15722	4.12646	4.06283	3.98236	3.92293	4.03779	3.79942	3.79857	3.57081	3.90551	3.60858	3.49728	4.6245	4.25568	4.40209	3.68019	4.1155	3.98103	3.72294	3.67046	4.42742	35.7182	0.202102	0.534958	0.743879	27.3499	0.759703	0.0476101	0.102294	37.9663	0.918877	0.00602308	0.0116412	45.5826	-0.15686	0.594073	0.652792	17.4276
ENSMUSG00000004105	Angptl2	2.9651	2.74195	3.42669	1.39388	2.80549	3.81245	2.70049	2.49154	2.78716	2.61962	0.990446	1.54431	0.989677	0.700667	0.596672	0.847188	2.54804	2.48714	3.25003	3.35256	3.73964	3.65373	1.13941	1.63678	1.6779	2.77444	1.17481	0.714842	2.76173	3.58198	1.48469	0.982125	2.92797	0.152955	NA	8.28034	-2.9657	0.000352826	0.00137841	23.2595	-3.96964	3.80837e-11	1.63554e-10	2.57272	-0.339217	0.773491	0.812321	5.15923
ENSMUSG00000004110	Cacna1e	9.29794	9.10501	9.55176	8.36687	8.76992	8.81288	8.45676	8.4586	8.52902	8.52964	9.38211	9.18839	9.13784	10.005	9.87374	9.81202	7.25584	7.05295	7.41138	7.58277	7.41207	6.92209	6.55183	7.11584	6.79578	8.78784	9.23612	9.89693	7.24006	7.30565	6.82115	2080.19	-0.858929	2.21183e-16	9.50093e-15	755.73	2.94524	9.80629e-59	9.49317e-57	1094.67	2.88171	1.79453e-40	2.58387e-39	899.739	3.71661	3.05916e-80	7.11831e-79	888.289
ENSMUSG00000004113	Cacna1b	8.50507	7.9868	7.53401	7.84002	7.97375	8.17862	7.65721	7.67632	7.65741	7.71131	7.83432	7.69007	7.61599	7.76417	7.66431	7.59141	6.10177	6.56213	6.63819	6.10455	6.10098	5.47875	5.21329	6.04374	5.73808	7.87205	7.71346	7.6733	6.43403	5.89476	5.66504	476.388	0.0395616	0.749173	0.879119	276.376	1.86924	8.63032e-20	1.74057e-18	360.381	2.80131	2.41228e-34	2.86456e-33	302.815	3.20245	8.74744e-40	8.00223e-39	185.393
ENSMUSG00000004127	Trmt10a	1.17085	3.11962	3.41932	1.50077	1.34985	1.28714	1.90742	2.30738	2.14662	2.49704	2.10626	2.48458	2.69627	2.07137	2.5035	1.48511	3.05625	2.83465	2.5734	2.84405	2.49555	2.62422	2.8445	2.91926	2.97349	2.0706	2.42904	2.01999	2.82143	2.65461	2.91241	9.37076	0.538177	0.42323	0.659243	12.6795	-0.503204	0.37574	0.517745	15.6935	-0.145216	0.772967	0.825516	15.5703	-0.500215	0.310526	0.37542	7.43757
ENSMUSG00000004151	Etv1	4.99405	5.42051	5.28048	5.21434	4.67525	5.12623	5.46978	4.73833	5.21049	4.89018	5.45352	5.29094	5.27514	5.9671	6.12045	6.02409	5.93296	6.13978	6.48761	5.47886	5.43882	5.33884	5.63826	5.54966	5.65441	5.10196	5.33987	6.03721	6.18678	5.41884	5.61411	116.6	-0.989543	3.30309e-07	5.18968e-06	108.4	-1.06015	1.54699e-05	7.86211e-05	97.2825	0.142175	0.514137	0.5958	90.7635	-0.0703953	0.744935	0.788163	98.8664
ENSMUSG00000004187	Kifc2	6.78311	7.34965	6.4491	6.93603	7.22087	7.22075	6.83313	5.93904	6.7529	6.78645	6.40394	6.37721	6.05437	5.98106	5.89831	5.88476	5.32543	5.57305	5.35612	4.86331	5.02684	4.96167	4.17187	5.32951	4.7315	6.8271	6.27851	5.92137	5.4182	4.95061	4.74429	144.139	0.504444	0.00819591	0.041001	105.257	1.36766	8.75739e-08	6.20846e-07	133.894	2.2046	2.24431e-21	1.62867e-20	113.005	2.4327	6.72124e-13	2.49187e-12	57.2077
ENSMUSG00000004207	Psap	11.0026	11.4308	11.2758	11.8972	11.3563	11.4215	10.8208	10.7926	10.8663	10.8933	12.6284	12.6313	12.5864	12.3106	12.2017	12.2422	12.7618	12.7045	12.8561	13.5934	13.7186	13.6902	14.0975	14.3588	14.303	11.1757	12.6154	12.2515	12.7741	13.6674	14.2531	11545	0.477983	4.13037e-10	9.74565e-09	12384.5	-0.0560195	0.578904	0.703496	27845.2	-1.1238	1.35188e-29	1.35837e-28	34090	-1.80178	8.03294e-60	1.20632e-58	7389.47
ENSMUSG00000004221	Ikbkg	4.80585	5.2295	4.19468	3.21228	5.60562	4.80377	4.22058	4.35506	5.04509	4.12852	5.67404	5.61264	5.54527	5.71275	5.45406	5.70436	5.98952	5.48383	5.32363	5.92551	5.98109	6.00186	6.2639	6.18415	6.44037	4.56009	5.61065	5.62372	5.59899	5.96949	6.29614	107.837	-0.0181099	0.928643	0.973146	92.2011	0.175014	0.509406	0.642696	151.271	-0.238018	0.184998	0.254306	152.681	-0.616613	0.00070126	0.00139306	64.6609
ENSMUSG00000004231	Pax2	-0.436181	-0.529009	-0.178944	-0.0745994	-0.23584	0.919041	0.259112	0.176746	0.0719246	0.441314	-0.708896	-0.481845	-0.663101	-0.630673	-0.314246	0.379485	1.55856	1.10462	1.70746	-0.664298	-0.655881	-0.677857	-0.627747	-0.193282	-0.627472	0.0413565	-0.617947	-0.188478	1.45688	-0.666012	-0.482834	0.984684	-2.72546	0.211408	NA	7.46006	-6.01694	1.04287e-05	5.44598e-05	0.112985	0.67431	0.868747	NA	0.299953	-0.69971	0.844436	NA	5.71642
ENSMUSG00000004233	Wars2	3.266	3.33489	3.11239	3.32832	3.29842	3.15058	3.82055	3.9291	3.46003	3.83145	3.20912	2.9103	3.17868	3.7239	3.05042	3.33753	2.82723	3.08613	2.89559	3.66567	3.70695	3.77123	3.50978	3.55699	3.74878	3.45317	3.09936	3.37061	2.93632	3.71462	3.60518	18.3775	-0.507343	0.278301	0.517524	11.7549	0.419851	0.461552	0.600167	26.344	-0.75456	0.047906	0.0773776	20.781	-0.524406	0.211981	0.269301	10.092
ENSMUSG00000004263	Atn1	-0.936374	-0.157344	-0.767256	-0.698655	-0.804661	0.116007	0.420541	-0.968669	-1.02318	-1.03162	-0.945643	-0.711108	-0.833242	-1.11169	-1.12768	-1.05719	-0.952075	-1.12046	-1.09048	-0.836163	-1.12157	-0.669842	-0.488342	-1.11332	-1.11041	-0.585121	-0.829997	-1.09885	-1.05434	-0.875859	-0.904022	0.533027	2.02399	0.419455	NA	0.481351	1.73854	0.51054	NA	1.20212	0.419544	0.805188	0.851111	1.03431	0.507622	0.793763	0.829659	0
ENSMUSG00000004264	Phb2	7.10628	6.82615	6.73322	7.13152	7.01948	6.70375	7.00725	7.10316	6.87434	7.22945	6.45114	6.3197	6.05446	6.61067	6.28372	6.16494	6.3869	6.3939	5.82363	6.29883	6.45743	6.55851	6.76123	6.89742	6.63102	6.97346	6.2751	6.35311	6.20147	6.43826	6.76323	148.376	-0.12906	0.524235	0.736302	118.218	0.250143	0.36386	0.505393	182.931	0.0358164	0.858568	0.894563	183.224	-0.353187	0.0766975	0.110178	85.7381
ENSMUSG00000004266	Ptpn6	3.9228	2.60598	1.44111	4.90896	3.62688	3.63263	3.05811	3.67138	2.50419	3.01741	1.67746	0.673906	0.322173	0.48524	0.273959	0.751502	1.00426	0.899904	0.671895	1.44923	0.880785	0.727748	9.50921	9.26546	9.78674	3.23895	0.89118	0.503567	0.858686	1.01925	9.52047	0.88432	2.78046	0.218956	NA	0.953391	1.58321	0.483179	NA	2.07869	0.391314	0.783087	0.834176	807.546	-9.49206	1.42044e-79	3.24293e-78	0.106445
ENSMUSG00000004267	Eno2	10.5387	10.2606	10.1032	10.1698	10.6354	10.017	10.4515	10.5604	10.1817	10.5062	10.7956	10.7037	10.6939	10.8092	10.7608	10.6908	10.6099	10.6	10.2186	8.85374	8.67355	8.34455	8.3555	8.91504	8.39616	10.3425	10.7311	10.7536	10.4762	8.62395	8.55557	4066.47	-0.0448766	0.589126	0.78057	3109.37	0.477507	0.00266608	0.00849961	2895.09	3.19501	7.5395e-68	2.27972e-66	2486.24	3.34975	9.49001e-63	1.5412e-61	2182.98
ENSMUSG00000004268	Emg1	4.30061	4.90737	5.41015	3.53601	5.45328	3.93486	4.41459	4.0774	4.75615	4.27031	4.55578	4.31675	4.4326	4.37774	4.39824	4.52339	5.54657	5.11482	4.98688	4.84222	5.17511	5.08151	5.89013	5.90096	6.13627	4.50607	4.43504	4.43312	5.21609	5.03295	5.97579	38.4112	0.00672091	0.983085	0.994212	52.1945	-0.966885	0.00182415	0.00606852	63.7198	-0.632487	0.0177906	0.0314683	100.06	-1.85495	3.87693e-16	1.65331e-15	36.2833
ENSMUSG00000004270	Lpcat3	4.11526	4.57231	4.89359	3.05789	4.47473	4.67541	4.65545	4.68842	4.64466	4.43611	4.09362	3.74776	4.02734	3.6712	4.02175	3.58914	4.54042	3.75312	4.26658	6.8533	6.92294	6.74278	7.67069	7.84657	7.82546	4.42138	3.95624	3.7607	4.18671	6.83968	7.78091	19.7941	0.278218	0.53623	0.745041	21.9255	-0.17694	0.706116	0.803151	206.7	-3.75688	5.86159e-63	1.55118e-61	386.917	-4.92627	4.61373e-127	2.64291e-125	13.7384
ENSMUSG00000004285	Atp6v1f	5.26492	6.15505	6.41869	5.16819	5.68794	5.93835	5.56946	5.42722	5.40064	4.86795	6.91552	7.12053	7.16406	7.15399	7.20546	7.14936	7.05301	7.31519	7.47226	7.48247	7.56655	7.27351	7.85541	7.69292	7.7185	5.58984	7.0667	7.1696	7.28015	7.44085	7.75561	316.105	-0.153203	0.267377	0.504987	284.794	-0.154492	0.408732	0.551774	428.542	-0.253385	0.125003	0.181057	425.618	-0.597262	3.82663e-05	8.63747e-05	206.699
ENSMUSG00000004296	Il12b	-1.6032	-1.67065	-1.41632	0.793641	-1.45765	-1.50731	-1.79381	-1.63889	-1.69913	-1.70846	-1.96724	-1.97526	-1.93514	-1.86084	-1.94127	-1.73671	-1.62056	-1.91339	-1.77351	-1.93597	-1.92061	-1.94539	-1.85432	-0.748501	-1.34116	-1.37018	-1.95922	-1.84627	-1.76915	-1.93399	-1.31466	0	NA	NA	NA	0	NA	NA	NA	0	NA	NA	NA	0.819518	-3.52579	0.157969	0.208189	0
ENSMUSG00000004317	Clcn5	4.94289	3.43511	2.54262	4.53284	5.05433	4.60308	4.32591	4.64297	5.02747	4.99134	3.87811	3.87717	3.72658	3.39072	3.4549	3.23416	4.36864	4.90026	4.92344	4.26322	4.13362	3.86036	6.0621	5.95745	6.18892	4.40986	3.82729	3.35993	4.73078	4.08574	6.06949	18.2652	0.761206	0.0999207	0.26772	34.8258	-1.25536	0.000366344	0.00142764	32.0039	-0.150643	0.669581	0.737167	106.689	-2.82077	4.32078e-33	3.31702e-32	21.1553
ENSMUSG00000004319	Clcn3	8.00699	8.03462	8.2551	7.83797	8.14364	8.09667	8.08616	8.2883	8.25169	7.99127	8.27686	8.21961	8.38547	8.35836	8.33443	8.53399	8.73476	8.71381	8.96254	9.29403	9.29711	9.30239	7.4969	7.69975	7.82812	8.09924	8.29398	8.40893	8.80371	9.29784	7.67492	662.223	-0.168732	0.139962	0.335853	689.101	-0.539741	0.000206267	0.000847839	1268.16	-1.0916	6.20442e-21	4.41997e-20	507.365	1.17476	5.15956e-15	2.09914e-14	501.705
ENSMUSG00000004328	Hif3a	-0.271491	0.367889	2.17867	2.88533	-0.0335792	-0.114753	1.61398	0.431183	1.04749	-0.38738	-0.641381	-0.359754	-0.561052	-0.507174	-0.14588	-0.410801	-0.299851	-0.54401	-0.440569	0.427278	0.672885	1.45153	0.377885	0.343476	0.379226	0.771734	-0.520729	-0.354618	-0.428143	0.850564	0.366862	0.245654	-1.0359	0.778438	NA	0.0784542	-0.379878	0.925828	NA	3.56359	-4.44047	0.00337011	0.00679012	1.36177	-3.18086	0.0807386	0.11552	0.097895
ENSMUSG00000004341	Gpx6	-1.16465	-1.21373	-1.02865	-0.973484	-0.282218	-1.09487	-0.938942	-1.19062	-1.23445	-0.852987	-0.916116	-1.20058	-1.07849	-1.32724	-1.33754	-1.26181	-1.17728	-1.05667	-0.916262	-0.885112	-1.33363	-1.33895	-1.32648	-1.01717	-1.3264	-0.99746	-1.06506	-1.30886	-1.05007	-1.1859	-1.22335	0.562237	2.09231	0.396646	NA	0.919687	0.0840301	0.964051	NA	1.10902	0.981379	0.610125	0.684493	0.838987	1.48988	0.476858	0.543124	0.286099
ENSMUSG00000004344	Gpx5	0	0	0	0	0	0	0	0	0	0	0	0	0	0	0	0	0	0	0	0	0	0	0	0	0	NA	NA	NA	NA	NA	NA	NA	NA	NA	NA	NA	NA	NA	NA	NA	NA	NA	NA	NA	NA	NA	NA	NA
ENSMUSG00000004347	Pde1c	4.54065	3.87066	4.54126	4.82148	5.01956	5.11027	5.66584	5.71072	5.50921	5.69004	2.72706	2.93184	2.43429	2.46871	2.82983	2.99429	6.50995	6.00053	6.01516	3.90177	3.82112	3.57395	3.49976	3.37217	3.25734	5.04797	2.69773	2.76428	6.17522	3.76561	3.37642	6.7202	-0.0138607	0.985189	0.99431	97.9851	-4.90414	3.32254e-40	1.69595e-38	16.9544	-1.50921	0.00248522	0.0051307	10.4462	-0.81459	0.167387	0.219116	68.6527
ENSMUSG00000004356	Utp20	6.29998	6.59572	6.48917	6.53254	5.81984	5.89051	5.37065	5.52931	6.01309	6.0913	5.95637	5.94289	5.88872	6.27154	6.39687	6.53764	5.17766	5.71722	5.49312	5.70962	5.75831	5.76348	6.57497	6.25252	6.4847	6.06321	5.92933	6.40201	5.46267	5.74381	6.4374	154.499	-0.663355	0.000119589	0.00110078	84.343	0.749499	0.00333487	0.010368	131.717	0.516266	0.0061815	0.0119192	156.125	-0.399527	0.0315703	0.0489736	80.0797
ENSMUSG00000004359	Spic	-1.57186	-1.60266	-1.48651	-1.45189	-1.50539	-1.52807	-1.65891	-1.58816	-1.61567	-1.61993	-1.70997	-1.711	-1.70548	-1.68953	-1.70639	-1.63284	-1.57979	-1.70441	-1.64964	-1.7056	-1.70471	-1.70699	-1.09224	-1.69376	-0.640109	-1.5629	-1.70881	-1.67625	-1.64461	-1.70577	-1.14204	0	NA	NA	NA	0	NA	NA	NA	0	NA	NA	NA	2.14468	-4.90167	0.01024	0.0172913	0
ENSMUSG00000004360	9330159F19Rik	4.41745	4.89517	4.63998	2.86464	4.76251	5.49069	3.92191	4.40341	4.93889	4.67406	2.17587	2.05619	1.70748	2.46462	1.85742	1.39077	1.58656	2.44433	2.55949	4.78219	5.05953	5.02146	2.85716	3.15894	2.13738	4.50087	1.97985	1.90427	2.19679	4.95439	2.71782	3.48343	0.122124	0.907924	0.964619	3.62153	-0.340837	0.741756	0.827569	54.3026	-4.34216	4.58343e-24	3.69025e-23	6.88761	-1.15245	0.136126	0.183077	2.36257
ENSMUSG00000004364	Cul3	8.63612	8.54713	8.71032	7.86527	8.33972	8.27372	8.97615	8.89943	8.64421	8.4008	8.77838	8.88218	8.93584	9.00449	9.19227	9.32948	8.87689	8.99084	9.31131	8.90504	8.75412	8.66504	8.48629	8.54041	8.55421	8.52929	8.86547	9.17541	9.05968	8.77473	8.52697	1136.75	-0.436077	0.000150129	0.00135217	910.687	-0.126722	0.458549	0.597313	1116.84	0.36628	0.00783875	0.0148361	863.537	0.77678	6.92331e-12	2.44043e-11	735.294
ENSMUSG00000004366	Sst	6.75602	7.02873	6.81711	6.72312	5.9469	6.58021	6.37508	6.05992	6.50522	6.42885	5.74967	5.39918	5.22538	3.53393	3.47854	3.71648	6.62525	6.72299	6.56245	6.10424	6.121	5.82121	5.84404	5.69075	5.79401	6.52212	5.45807	3.57632	6.6369	6.01548	5.77627	43.1464	3.4489	5.12582e-14	1.76597e-12	132.912	-1.44164	1.82651e-09	1.59942e-08	125.269	-0.51049	0.0361381	0.0601063	92.8822	-0.102198	0.684793	0.735498	70.3449
ENSMUSG00000004371	Il11	-2.072	-1.8322	-2.02717	-2.00898	-2.03709	-2.049	-2.11773	-2.08057	-2.09502	-2.09725	-2.16287	-2.16322	-2.15258	-2.13381	-2.15825	-2.10403	-2.07617	-2.14642	-2.11286	-2.02534	-2.14815	-2.16178	-2.13224	-2.13603	-2.1321	-2.0417	-2.15956	-2.13203	-2.11181	-2.11176	-2.13346	0	NA	NA	NA	0	NA	NA	NA	0.187841	-1.24927	0.759488	NA	0	NA	NA	NA	0
ENSMUSG00000004383	Large1	7.79279	7.64939	7.79182	7.26743	7.41365	7.45153	7.59762	7.57582	7.62745	7.59741	7.94634	7.89131	7.77819	8.14226	7.92749	8.14013	8.4026	8.29499	8.09606	6.75657	6.73087	6.5118	6.97309	7.15685	7.29664	7.57649	7.87195	8.06996	8.26455	6.66641	7.1422	558.694	-0.271817	0.0246849	0.096818	522.75	-0.364966	0.0167814	0.0425353	413.271	1.96075	2.07337e-33	2.36575e-32	399.445	1.31926	2.73595e-17	1.22861e-16	395.58
ENSMUSG00000004393	Ddx56	4.81765	5.22607	4.69037	4.75481	5.55089	5.92176	5.62685	5.42165	5.27175	5.4858	5.93503	5.92666	5.76147	5.7168	5.99444	5.71155	6.28551	5.41011	5.48694	5.55903	5.46322	5.60685	5.68924	5.75555	5.76981	5.27676	5.87439	5.8076	5.72752	5.54303	5.7382	125.66	0.0569309	0.769821	0.891543	106.725	0.320913	0.307585	0.447138	135.018	0.718825	0.000228008	0.000545802	124.116	0.511432	0.00821626	0.0141269	71.8495
ENSMUSG00000004394	Tmed4	5.19523	5.69577	5.53988	6.39329	5.89394	5.86946	5.16361	5.01127	5.22926	5.67516	6.11893	6.026	5.9225	6.43941	6.17569	6.32093	7.03802	7.03337	7.18204	7.12101	7.2483	7.34521	6.98662	7.06892	6.92679	5.56669	6.02248	6.31201	7.08448	7.23817	6.99411	142.665	-0.409298	0.0247053	0.0968698	190.03	-1.28693	2.31209e-13	2.9612e-12	289.711	-1.39855	6.75291e-18	4.24275e-17	208.467	-1.01054	6.87339e-10	2.17729e-09	144.751
ENSMUSG00000004415	Col26a1	2.31918	1.95141	0.331668	2.87246	1.60823	0.979175	1.24499	0.020693	0.991481	1.67158	0.682636	0.694935	0.690917	0.629168	-0.225224	-0.0631475	0.0370226	-0.194343	0.818912	-0.212723	0.217585	0.603549	-0.153904	0.295844	0.644122	1.39909	0.689496	0.113599	0.22053	0.202804	0.262021	2.00471	1.70274	0.262959	0.500237	1.91023	1.39771	0.368159	0.509945	2.69083	1.50972	0.223067	0.297207	2.37211	1.46734	0.264286	0.325512	0.643948
ENSMUSG00000004446	Bid	1.85926	3.99936	2.19898	2.3407	4.09448	3.91942	3.70572	3.60602	3.40284	3.69164	4.01461	4.11804	4.29581	3.65126	4.13537	3.39382	4.33692	3.52046	3.84346	3.19767	3.4954	3.29483	6.16951	5.68099	6.21609	3.28184	4.14282	3.72682	3.90028	3.3293	6.0222	32.9475	0.464808	0.202161	0.424865	30.7012	0.532806	0.190578	0.311281	34.6182	1.47325	4.07499e-05	0.000107161	126.011	-2.24741	5.65631e-20	2.84313e-19	17.403
ENSMUSG00000004451	Ralb	3.91178	5.18029	2.92315	4.95854	5.9732	4.74279	5.09671	5.17662	4.94958	4.8253	4.22202	4.32267	4.09225	4.79117	4.33967	4.76674	5.52168	5.01697	4.58819	5.4466	5.63993	5.43827	7.59588	7.6171	7.7126	4.7738	4.21232	4.63253	5.04228	5.50827	7.64186	35.3317	-0.628188	0.0639525	0.196445	39.8891	-1.10407	0.00391485	0.0119393	72.9748	-1.61515	3.72888e-10	1.49963e-09	324.217	-4.29671	1.86487e-117	8.84857e-116	32.72
ENSMUSG00000004455	Ppp1cc	3.20149	2.34592	2.67777	2.91186	2.8134	2.65637	1.98355	1.35556	1.59645	2.23194	1.00405	1.52263	0.82957	1.23635	1.76464	0.659815	2.50034	1.78719	2.53195	1.70967	1.3233	0.773328	0.960108	1.43803	1.4765	2.37743	1.11875	1.22027	2.27316	1.26876	1.29155	2.83203	-0.417686	0.724044	0.866592	6.67288	-2.13684	0.0136702	0.0356802	3.5299	-0.123136	0.909329	0.9341	2.88437	0.0198408	0.986004	0.989396	4.84237
ENSMUSG00000004460	Dnajb11	6.96974	7.03647	6.51682	6.57874	6.10698	6.23872	6.78464	7.24958	6.83107	7.2777	7.04382	7.05291	7.07485	7.03301	7.12955	7.24562	7.77541	7.61973	7.80141	7.69905	7.75048	7.78584	8.34261	8.14962	8.27516	6.75905	7.05719	7.13606	7.73219	7.74512	8.2558	264.549	-0.120571	0.388348	0.627331	308.775	-0.760856	2.26826e-07	1.51762e-06	430.809	-0.693238	1.11502e-07	3.75229e-07	495.693	-1.30427	5.4636e-24	3.15846e-23	221.327
ENSMUSG00000004462	Tbccd1	2.19424	2.84242	1.94901	2.06955	3.25664	3.34104	3.56882	2.46183	3.32015	3.39345	3.26057	3.11788	3.33579	3.21412	3.11454	3.29997	3.96711	3.22316	2.97053	3.90256	3.7775	4.44572	3.91448	4.24681	4.17372	2.83972	3.23808	3.20954	3.38693	4.04192	4.11167	18.2931	0.0438595	0.922352	0.971195	18.1181	-0.121134	0.812658	0.876001	36.7518	-1.05582	0.00415821	0.0082648	31.8619	-1.04766	0.00265433	0.00489277	12.4164
ENSMUSG00000004473	Clec11a	0.721539	0.0272466	0.314742	0.42832	0.252812	2.31508	-0.0449458	0.0477612	1.17627	0.00377324	0.526042	1.01442	0.644615	1.12913	1.43717	1.08491	1.37584	0.859652	0.756816	0.796456	0.982934	0.390049	-0.0755866	-0.0830341	0.323015	0.52426	0.728359	1.21707	0.997436	0.723147	0.0547981	5.88753	-1.10096	0.166901	0.376002	4.19622	-0.42047	0.660237	0.769555	4.52225	0.281841	0.757144	0.812423	2.33094	3.24303	0.0413802	0.0628179	4.23058
ENSMUSG00000004500	Zfp324	4.22376	3.12804	1.88435	2.00587	3.8392	3.94422	3.59692	4.43531	3.87192	4.35086	3.19696	3.13778	3.15648	3.36505	3.07871	2.92063	2.95137	2.78967	1.36234	2.61981	2.76756	2.97282	3.38734	3.67219	3.44522	3.52804	3.16374	3.12147	2.3678	2.78673	3.50158	17.4393	0.0136819	0.97632	0.991663	11.326	1.28772	0.0687508	0.138997	17.7613	0.865653	0.0607106	0.0958336	21.7075	-0.237059	0.55665	0.61792	7.67312
ENSMUSG00000004508	Gab2	3.84383	4.45373	4.12417	5.05756	4.49172	4.44037	4.4609	4.17976	4.05519	4.43705	3.96521	3.64621	3.6205	3.88904	4.09104	2.91636	3.91928	4.52297	3.62211	5.14057	4.68016	5.04504	7.14201	7.28439	7.36797	4.35443	3.74397	3.63215	4.02145	4.95526	7.26479	20.1768	-0.0474203	0.919197	0.96993	20.8659	-0.389095	0.430838	0.571992	51.8109	-1.52378	1.48092e-06	4.50793e-06	261.613	-4.41875	1.83314e-93	5.53208e-92	14.2794
ENSMUSG00000004530	Coro1c	7.53646	6.66303	6.89808	7.2251	7.41244	7.06722	7.35246	7.47169	7.19685	7.34919	6.59513	6.62486	6.50181	6.93717	6.84544	6.91334	7.31048	7.07263	6.89672	6.06168	6.01703	6.0042	7.43882	7.45042	7.58397	7.21725	6.57393	6.89865	7.09328	6.02764	7.49107	203.362	-0.461391	0.00243168	0.0150459	192.553	-0.5629	0.003347	0.0104011	164.342	1.06534	4.06025e-09	1.52299e-08	283.135	-0.948294	8.59101e-11	2.85575e-10	153.755
ENSMUSG00000004535	Tax1bp1	7.77683	7.97534	8.6163	7.80342	7.32653	7.54211	7.60269	7.79691	7.70466	7.47179	8.81198	8.88363	8.88657	8.75311	8.96413	9.01	8.36346	8.67408	8.81724	8.75968	8.74557	8.65867	9.03706	8.80046	8.92141	7.76166	8.86073	8.90908	8.61826	8.7213	8.91964	1075.45	-0.0830936	0.436949	0.671404	813.755	0.452454	0.00590222	0.017146	1184.05	0.43313	0.000184415	0.000446292	1093.75	0.22797	0.0587981	0.086711	580.658
ENSMUSG00000004540	Psg17	0	0	0	0	0	0	0	0	0	0	0	0	0	0	0	0	0	0	0	0	0	0	0	0	0	NA	NA	NA	NA	NA	NA	NA	NA	NA	NA	NA	NA	NA	NA	NA	NA	NA	NA	NA	NA	NA	NA	NA
ENSMUSG00000004542	Psg19	0	0	0	0	0	0	0	0	0	0	0	0	0	0	0	0	0	0	0	0	0	0	0	0	0	NA	NA	NA	NA	NA	NA	NA	NA	NA	NA	NA	NA	NA	NA	NA	NA	NA	NA	NA	NA	NA	NA	NA
ENSMUSG00000004552	Ctse	-1.16464	-1.24013	-0.95544	-0.870581	-1.00171	-1.0573	-1.31736	-1.20459	-0.402491	-1.28246	-1.37749	-1.38323	-1.35399	-1.33725	-1.35853	-1.29579	-1.18406	-1.34877	-1.30969	-1.3546	-1.35027	-1.36158	-0.119593	0.153361	0.118645	-1.04967	-1.37157	-1.33053	-1.28084	-1.35548	0.0508043	0	NA	NA	NA	0	NA	NA	NA	0	NA	NA	NA	7.50853	-6.71673	7.82927e-07	2.02886e-06	0
ENSMUSG00000004558	Ndrg2	9.59393	10.014	9.4342	9.7223	9.61337	9.72182	10.0118	9.99881	9.80151	9.91471	7.48877	7.28184	7.3848	6.25006	6.23128	6.02944	7.96758	8.04161	7.89758	12.9944	13.0299	13.5287	8.40056	8.37353	8.16745	9.78264	7.38514	6.17026	7.96892	13.1843	8.31385	114.318	2.34857	6.52456e-23	4.43869e-21	233.199	-0.757954	9.48029e-06	4.99343e-05	21476.7	-7.41371	0	0	344.237	-1.11635	6.0812e-12	2.15129e-11	113.562
ENSMUSG00000004561	Mettl17	2.96343	2.9765	4.84043	4.8246	3.63295	4.21493	3.75013	3.85067	4.14509	3.17516	3.29089	3.08885	3.26117	3.0313	3.13108	3.21236	4.24002	3.67163	3.09822	3.40057	3.86403	3.44652	4.10306	3.54352	3.70166	3.83739	3.21364	3.12491	3.66996	3.57038	3.78275	14.8876	0.155147	0.755383	0.882615	18.8185	-0.6583	0.199922	0.323084	23.3166	-0.359013	0.384977	0.470342	22.6247	-0.639455	0.127446	0.172663	12.5852
ENSMUSG00000004562	Arhgef40	4.58076	4.59578	4.66088	4.93967	4.95836	4.45989	4.43728	4.82733	5.06687	4.33423	3.36618	3.10573	2.71492	2.42266	2.87076	2.71907	4.51674	4.22483	4.21882	5.94057	5.80306	6.1997	7.05446	6.80032	7.04628	4.6861	3.06228	2.67083	4.32013	5.98111	6.96702	6.86352	0.955034	0.220702	0.4493	18.8969	-1.77107	0.000294484	0.0011677	103.468	-3.97324	2.96979e-36	3.74735e-35	197.651	-5.14702	1.87995e-74	3.92251e-73	11.7728
ENSMUSG00000004565	Pnpla6	6.77338	6.09347	6.42362	6.25645	6.80841	6.55955	6.23925	6.74639	6.26779	6.76546	5.85894	5.91121	5.6078	5.90993	5.80916	5.61083	6.94993	6.41238	6.48607	6.37542	6.57709	6.54105	5.37652	5.27985	5.6027	6.49338	5.79265	5.77664	6.61613	6.49785	5.41969	98.4962	0.00917425	0.966257	0.987689	135.437	-0.982788	8.83418e-05	0.000395474	171.936	-0.723087	0.000161503	0.000394292	86.5416	0.883092	0.000346895	0.000712097	93.7617
ENSMUSG00000004567	Mcoln1	6.99084	6.76626	6.06572	6.12667	6.77879	6.52924	6.25687	6.60496	6.45621	6.74284	6.91342	6.88637	7.05485	6.73916	6.54705	6.6332	6.92221	7.24936	7.0069	6.60427	6.69911	6.68356	6.70323	6.61365	6.76038	6.53184	6.95155	6.6398	7.05949	6.66231	6.69242	232.336	0.414192	0.00638201	0.0336209	239.688	-0.022099	0.901579	0.936965	283.445	0.64362	2.91527e-05	7.78933e-05	244.492	0.664392	1.93077e-05	4.47352e-05	145.118
ENSMUSG00000004568	Arhgef18	6.92413	6.34378	6.02867	5.25587	6.35787	6.75742	6.73836	6.97188	6.80932	6.94132	6.29607	6.33363	6.38938	6.57278	6.42313	6.64967	6.14943	6.10479	6.07004	6.27105	6.16381	6.6533	6.27379	6.32299	6.0289	6.51286	6.33969	6.54853	6.10809	6.36272	6.20856	178.927	-0.297	0.0679616	0.205238	123.723	0.490382	0.0115773	0.0309486	195.435	0.183085	0.367728	0.453322	154.826	0.483269	0.00900404	0.015369	97.1196
ENSMUSG00000004591	Pkn2	5.93698	6.00242	5.71878	6.61514	4.92777	6.03938	5.973	6.08173	6.17512	5.56604	4.93239	4.87614	5.09867	4.90409	5.01488	5.03293	5.36236	5.8317	5.85226	6.78926	6.76559	6.7919	6.52956	6.4521	6.23576	5.90364	4.96907	4.98397	5.68211	6.78225	6.40581	48.2052	-0.0371285	0.896266	0.958734	62.3887	-0.96826	0.000592698	0.00220916	184.661	-2.32227	2.76497e-35	3.38937e-34	117.672	-1.76407	3.13099e-16	1.34101e-15	43.5098
ENSMUSG00000004609	Cd33	0.460867	0.316766	0.860414	3.58501	3.38625	0.659442	1.57926	1.22305	1.91501	1.01745	-0.570579	0.480692	-0.271229	-0.0995821	-0.322711	0.173194	0.424089	-0.21499	0.0925678	0.341489	0.402592	1.96555	9.69719	9.91283	10.0747	1.50035	-0.120372	-0.0830328	0.100556	0.903209	9.89491	0.260696	1.03448	0.789051	NA	0.235363	0.745745	0.852917	NA	2.16835	-2.26993	0.159413	0.22429	745.554	-10.9634	1.48614e-38	1.32491e-37	0
ENSMUSG00000004610	Etfb	1.81203	3.30516	4.16996	2.26223	4.30558	2.96107	3.50323	3.66408	3.75011	3.94641	3.42148	3.18849	2.87735	3.87691	2.95114	2.04104	4.63221	3.55916	3.49376	4.66346	5.04604	5.39851	4.19441	4.13563	4.50556	3.36799	3.16244	2.95636	3.89504	5.03601	4.27853	15.0792	-0.0602249	0.91832	0.969539	21.8272	-1.04805	0.0559526	0.117103	65.4827	-2.48489	3.5917e-13	1.76483e-12	30.4031	-1.34125	0.000417546	0.000848941	15.2498
ENSMUSG00000004612	Nkg7	0	0	0	0	0	0	0	0	0	0	0	0	0	0	0	0	0	0	0	0	0	0	0	0	0	NA	NA	NA	NA	NA	NA	NA	NA	NA	NA	NA	NA	NA	NA	NA	NA	NA	NA	NA	NA	NA	NA	NA
ENSMUSG00000004626	Stxbp2	3.82589	4.26675	5.19435	5.57449	4.95356	5.08956	3.53025	3.69831	4.3883	3.75298	2.58303	3.26176	2.8748	3.29583	3.02141	2.78177	3.33517	1.87869	1.9105	1.55948	3.01646	1.73006	6.08959	6.11426	6.45683	4.42744	2.90653	3.033	2.37479	2.102	6.22023	11.942	-0.181751	0.751827	0.880242	7.93273	1.12338	0.209362	0.335064	10.05	1.47256	0.0626799	0.0984415	128.162	-4.22533	2.37145e-45	2.47729e-44	5.9058
ENSMUSG00000004630	Pcp2	2.11431	1.97315	2.52175	5.10426	5.93571	5.96357	5.62641	4.18848	5.51751	6.18757	1.25086	1.19193	1.46653	1.6032	1.75838	4.2868	11.3459	11.3178	11.0246	4.1715	4.51721	4.15301	4.92953	3.84786	4.60998	4.51327	1.30311	2.54946	11.2294	4.28057	4.46246	6.071	-6.57655	0.0932359	0.255374	2558.7	-15.4497	7.4e-39	3.52114e-37	19.4974	-7.88137	2.55805e-10	1.04185e-09	20.6456	-8.17037	1.33307e-10	4.38959e-10	1793.36
ENSMUSG00000004631	Sgce	6.0436	6.72616	6.06048	7.60543	6.57941	7.13903	6.69621	7.10587	6.67206	6.73881	6.23888	6.42655	6.52599	6.43182	6.35958	6.43162	6.22135	6.12331	6.44133	7.36419	7.42167	7.31058	8.45108	8.56385	8.60924	6.73671	6.39714	6.40767	6.26199	7.36548	8.54139	148.562	-0.0222216	0.901998	0.961625	118.79	0.355236	0.121087	0.21826	300.208	-1.09221	2.40012e-11	1.04728e-10	572.332	-2.56087	4.50433e-72	8.86959e-71	82.584
ENSMUSG00000004633	Chn2	5.81913	6.06552	4.40451	6.97857	7.90404	6.9806	7.74642	7.66263	7.43079	7.45443	5.59014	5.37976	5.61828	4.52491	4.18711	4.96464	8.54945	8.03823	8.4267	5.34672	5.07557	4.94477	7.21795	7.06404	7.30353	6.84467	5.5294	4.55889	8.33813	5.12235	7.19517	47.7469	1.62254	1.85723e-06	2.54766e-05	433.446	-3.65157	4.02447e-66	4.59281e-64	71.419	0.864078	0.00139907	0.00300857	201.369	-2.0229	2.17354e-28	1.449e-27	288.481
ENSMUSG00000004637	Wwox	4.51634	4.84179	5.4346	4.27549	4.84296	5.16139	4.93795	4.85522	5.10419	4.79646	4.74908	4.71136	4.93252	4.51257	4.40644	3.98734	5.5376	5.74613	5.37648	5.04604	5.33183	5.21193	4.87015	4.81192	4.57001	4.87664	4.79765	4.30211	5.5534	5.1966	4.7507	43.4773	0.663111	0.0343415	0.123481	70.7899	-0.952385	0.000268581	0.00107624	79.4835	-0.340115	0.157666	0.222082	54.1107	0.364179	0.189672	0.24427	42.5647
ENSMUSG00000004642	Slbp	4.84395	4.85509	3.6222	4.8935	4.65359	4.48768	4.5724	4.18649	4.69803	4.25382	5.73283	5.67412	5.69338	5.28354	5.34376	5.65951	6.6386	6.55124	6.78131	5.75586	5.58738	5.6021	6.97192	6.81419	6.83912	4.50667	5.70011	5.42894	6.65705	5.64845	6.87508	99.8336	0.377809	0.0748627	0.220799	161.108	-1.12587	6.013e-10	5.54563e-09	131.398	0.315808	0.101185	0.150222	214.083	-1.25455	3.13264e-15	1.28478e-14	104.445
ENSMUSG00000004651	Tyr	-2.37506	-2.37646	-2.37118	-2.3696	-2.37204	-2.37307	-2.37902	-2.3758	-2.37705	-2.37724	-2.38366	-2.37617	-2.38203	-2.38041	-2.38252	-2.37783	-2.37542	-2.3815	-2.37859	-2.3821	-2.38165	-2.38287	-2.38027	-2.3806	-2.38026	-2.37465	-2.38062	-2.38025	-2.3785	-2.3822	-2.38038	0.0868986	-0.0958564	0.981258	NA	0.0784542	-0.379878	0.925828	NA	0.112985	0.67431	0.868747	NA	0.098018	0.26208	0.948789	NA	0
ENSMUSG00000004654	Ghrhr	-2.33636	-2.33873	-2.32979	-2.32713	-2.33125	-2.33299	-2.34306	-2.33762	-2.33974	-2.34006	-2.35096	-2.35098	-2.34817	-2.34542	-2.349	-2.34106	-2.33697	-2.34727	-2.34235	-2.34828	-2.34752	-2.33083	-2.34519	-2.34575	-2.34517	-2.33567	-2.35004	-2.34516	-2.3422	-2.34221	-2.34537	0	NA	NA	NA	0	NA	NA	NA	0.159962	-1.24927	0.759488	NA	0	NA	NA	NA	0
ENSMUSG00000004655	Aqp1	-0.271735	0.585979	-0.0360288	0.0595822	-0.0881625	-0.150796	0.570191	0.927997	0.527481	1.13188	-0.452133	-0.459384	-0.120704	-0.399176	-0.42766	0.452768	0.307917	-0.0933587	-0.36909	-0.422482	0.919236	0.585002	-0.397111	0.212003	0.615456	0.325638	-0.344074	-0.12469	-0.0515106	0.360585	0.143449	0.909859	-2.37158	0.322369	NA	0.765072	-2.22649	0.373608	NA	2.79783	-3.99896	0.0202567	0.0354465	1.45092	-3.17661	0.110534	0.152326	0.887765
ENSMUSG00000004661	Arid3b	2.76265	3.44915	2.04376	3.65834	3.43341	2.61393	1.99347	2.45363	3.08825	1.74566	1.50888	1.67099	1.75094	1.07882	1.16278	1.67471	0.943765	0.986984	1.24465	1.20452	1.24969	1.64365	3.68068	3.71253	3.96142	2.72423	1.6436	1.30544	1.05847	1.36595	3.78488	3.53345	0.914924	0.388621	0.627331	2.43927	2.06991	0.134543	0.237409	4.5056	0.854659	0.340973	0.425838	25.4997	-3.19691	1.00385e-11	3.50714e-11	1.08215
ENSMUSG00000004665	Cnn2	1.04658	3.15931	1.37268	1.50169	1.3011	2.44678	1.89646	2.05689	0.880875	2.74851	1.44316	0.58253	1.24535	3.43017	2.99956	3.03671	1.01634	1.30951	0.756005	4.33187	4.25901	4.82529	5.18741	5.1962	5.45862	1.84109	1.09035	3.15548	1.02728	4.47206	5.28074	12.3017	-3.66082	3.4498e-07	5.40119e-06	1.15138	0.987796	0.602773	NA	44.0021	-5.2082	4.35816e-18	2.76028e-17	72.6956	-6.1567	5.29423e-28	3.48662e-27	7.22023
ENSMUSG00000004667	Polr2e	6.03359	5.65911	5.33423	5.01401	5.19413	5.76214	5.33588	4.61581	5.38364	5.05463	6.92365	6.83498	6.94103	6.78285	6.75021	6.69571	6.38251	6.4244	6.37731	6.72412	6.912	6.78216	7.46232	7.41641	7.47491	5.33872	6.89989	6.74292	6.39474	6.80609	7.45121	263.48	0.188259	0.174082	0.385512	197.998	0.835325	6.16781e-07	3.87025e-06	325.148	0.369623	0.0130882	0.0237475	370.661	-0.414576	0.00131773	0.00252748	125.354
ENSMUSG00000004668	Abca13	-0.566026	-0.640695	-0.359108	-0.275175	-0.404874	0.130855	-0.70398	-0.605538	-0.672229	-0.677218	-0.559895	-0.590134	-0.21537	-0.722073	-0.744742	-0.686531	-0.585235	-0.73447	-0.246967	-0.219941	-0.00280507	0.607609	0.776567	0.824109	0.294336	-0.477399	-0.455133	-0.717782	-0.522224	0.128288	0.631671	0.530058	1.95897	0.439764	NA	0.737197	0.628198	0.773881	NA	3.27228	-2.07789	0.0828682	0.125926	5.00009	-3.06625	0.00323653	0.00588539	0.179654
ENSMUSG00000004677	Myo9b	5.91386	5.78629	6.30651	5.61315	5.52367	6.03955	5.56764	5.6623	5.93119	5.97923	3.61788	3.33591	3.55558	3.08999	3.12149	2.62671	3.6344	3.26239	3.01469	5.43144	5.4946	5.41055	7.10966	7.15781	7.24208	5.83234	3.50312	2.94606	3.30383	5.44553	7.16985	9.19267	1.07949	0.107427	0.280597	9.60948	0.659226	0.30817	0.447897	62.0739	-2.7026	3.51433e-19	2.31846e-18	218.318	-4.88611	3.67446e-89	1.03364e-87	4.40778
ENSMUSG00000004698	Hdac9	6.21682	6.28935	5.81921	6.23572	6.15862	5.72945	5.65315	5.74362	5.77873	5.52163	6.65809	6.62293	6.63946	6.49583	6.64629	6.58047	6.02112	5.83184	6.10054	5.88408	5.93745	5.79018	6.32127	6.48811	6.34106	5.91463	6.64016	6.57419	5.9845	5.87057	6.38348	221.825	0.0678098	0.645662	0.81904	152.082	1.07843	3.63751e-08	2.70443e-07	207.731	1.31835	6.8485e-15	3.7015e-14	210.014	0.65684	3.39197e-05	7.69717e-05	101.235
ENSMUSG00000004707	Ly9	-0.101238	-0.245298	0.300103	4.64656	1.28516	0.104686	-0.474748	0.776419	-0.297556	-0.314797	-0.0202052	-1.08927	-0.053286	-0.602074	-0.7957	-0.367347	-0.138498	-0.702112	-0.436399	-0.756898	-0.00365443	-0.16019	6.9003	7.3764	7.10365	0.567929	-0.387587	-0.588373	-0.42567	-0.306914	7.12678	0.373835	1.4803	0.631746	NA	0.337989	1.20373	0.734045	NA	0.849727	0.375007	0.859511	0.895178	128.041	-8.41035	6.48176e-23	3.60421e-22	0
ENSMUSG00000004709	Cd244a	-1.13686	-1.18959	-0.990734	-0.93146	-1.02305	-1.06188	-1.2859	-1.16477	-1.21186	-1.21916	-1.14978	-1.33623	-1.04488	-1.31069	-1.32297	-1.24125	-1.15043	-1.31744	-1.27002	-1.32077	-1.3183	-1.32467	0.275536	-0.254528	-0.217553	-1.12153	-1.17697	-1.29164	-1.24596	-1.32124	-0.0655151	0.272332	1.00002	0.775569	NA	0.245988	0.727195	0.855217	NA	0.355396	1.76562	0.594646	NA	4.54831	-4.02546	0.00170625	0.00322671	0
ENSMUSG00000004730	Adgre1	2.66955	2.69145	2.94899	5.25091	5.0022	4.71833	3.31533	2.22387	2.79664	2.00393	2.08412	1.63272	1.30795	0.650152	0.441167	0.914757	1.16712	0.541205	0.835509	1.55938	0.526415	1.65236	8.79884	11.5531	9.72964	3.36212	1.67493	0.668692	0.847946	1.24605	10.0272	1.96498	3.91935	0.0188981	0.079321	1.77717	3.63331	0.0392696	0.0872886	3.76487	1.08351	0.309211	0.391531	2243.94	-9.89175	1.44339e-157	1.36154e-155	0
ENSMUSG00000004748	Mtfp1	5.62018	5.04326	6.01112	5.18653	4.30734	4.1521	4.80232	3.58041	4.56273	4.5928	6.32551	6.15371	6.23579	6.17176	6.33586	6.20509	6.41075	6.49186	6.22499	6.02209	6.02009	5.94908	4.04877	4.42283	3.99056	4.78588	6.23834	6.23757	6.37587	5.99709	4.15405	188.846	-0.0246748	0.877874	0.950689	171.643	-0.0372602	0.840726	0.895325	204.764	0.573041	0.000666233	0.00150169	116.666	3.33804	1.03645e-33	8.09881e-33	119.256
ENSMUSG00000004768	Rab23	5.15591	5.16565	4.34027	4.06805	5.26912	4.73563	5.76918	5.75628	5.35842	5.73328	5.0612	4.95417	5.20622	5.00195	5.06133	5.49498	4.81239	4.74228	4.92562	6.07689	5.92756	5.79683	4.60191	4.51382	4.17635	5.13518	5.07386	5.18609	4.82676	5.93376	4.43069	72.0453	-0.17425	0.489499	0.712235	51.3211	0.523633	0.073409	0.146141	128.168	-0.962642	5.27334e-06	1.52476e-05	53.654	1.25498	2.68568e-05	6.15829e-05	38.5007
ENSMUSG00000004771	Rab11a	8.36521	7.83375	8.51494	7.49251	7.43448	7.58564	8.45878	8.5622	8.27694	8.20948	8.53208	8.6898	8.83901	8.34087	8.61352	8.60067	8.60926	8.94792	8.99526	8.69201	8.49953	8.36924	8.70908	8.54595	8.59476	8.07339	8.68697	8.51835	8.85081	8.52026	8.6166	827.466	0.211483	0.102061	0.271304	822.596	-0.0786096	0.655821	0.765425	997.109	0.469167	0.00405948	0.0080774	879.564	0.409346	0.00323381	0.00588111	530.721
ENSMUSG00000004788	Eif2b2	5.56572	5.02153	5.53404	5.65023	4.67178	4.75279	4.50085	5.27213	4.91998	4.93263	5.73101	5.69302	5.5548	5.59606	5.53774	5.37923	6.00399	5.96725	5.1004	5.75036	5.92207	6.05138	5.91633	5.70476	5.81682	5.08217	5.65961	5.50434	5.69054	5.90793	5.81263	100.267	0.195715	0.344694	0.58719	96.3054	0.0311444	0.921091	0.950059	144.917	-0.0963591	0.62196	0.695287	117.422	0.105327	0.597716	0.656429	62.2448
ENSMUSG00000004789	Dlst	6.91568	7.39124	7.27073	7.84441	7.32385	7.39499	7.14438	7.89222	7.40053	7.5831	7.39726	7.49781	7.55743	7.55377	7.57588	7.60874	7.64014	8.09117	7.96197	7.74629	7.72925	7.90207	7.63944	7.53651	7.51022	7.41611	7.48417	7.57946	7.89776	7.79254	7.56206	369.881	-0.144754	0.247489	0.482029	371.883	-0.443221	0.0135941	0.0354948	487.655	-0.17883	0.201192	0.272914	371.136	0.201508	0.142251	0.190183	268.647
ENSMUSG00000004791	Pgf	1.97412	0.451563	0.770016	2.77964	0.702461	2.5238	0.837583	0.487882	0.419565	0.409217	0.376265	1.17702	1.26704	1.9054	1.48837	2.00224	1.61403	1.95424	1.89114	3.17998	3.46154	3.32639	1.0469	0.698539	0.258696	1.13558	0.940106	1.79867	1.8198	3.32264	0.668044	5.81483	-1.66783	0.0509784	0.165267	4.84046	-1.5853	0.0904481	0.172926	25.6885	-3.77993	9.08872e-12	4.07135e-11	2.20488	1.28827	0.368317	0.434843	5.2315
ENSMUSG00000004798	Ulk2	7.1261	6.68704	6.20076	6.53775	6.42539	6.73791	7.18287	7.13541	6.79604	7.07371	6.57876	6.63447	6.68707	6.74261	6.54781	6.48885	6.03586	5.94549	5.90329	6.74115	6.73226	6.55774	7.74816	7.73045	7.85736	6.7903	6.63343	6.59309	5.96155	6.67705	7.77865	190.078	0.0277674	0.863161	0.942103	126.548	1.14591	1.61676e-08	1.26502e-07	235.965	0.182845	0.266301	0.345559	364.466	-1.23547	2.42453e-20	1.23724e-19	85.5616
ENSMUSG00000004814	Ccl24	-0.820829	-0.938759	-0.480044	1.93778	-0.555419	1.24088	-1.06899	-0.885905	-0.96881	-0.978769	-1.33459	-1.37006	-1.20951	-1.13445	-1.23164	-1.00925	-0.852467	-1.1851	-1.04913	-1.21246	-1.19199	-1.24697	2.38566	2.23643	2.1482	-0.351886	-1.30472	-1.12511	-1.0289	-1.21714	2.25677	0	NA	NA	NA	0	NA	NA	NA	0	NA	NA	NA	26.3401	-8.52406	4.11511e-12	1.46863e-11	0
ENSMUSG00000004815	Dgkq	5.22611	5.01121	4.38855	4.2076	5.92336	5.76388	5.14135	5.17176	5.3321	5.29588	4.91946	4.88281	4.57494	4.99309	4.68855	4.59462	5.11625	5.07562	4.59008	3.88195	3.7214	4.01141	3.8222	4.20711	3.88282	5.14618	4.7924	4.75875	4.92732	3.87159	3.97071	56.4308	0.0357856	0.897364	0.959269	52.5934	-0.0371932	0.906485	0.940006	48.8176	1.67719	1.71586e-07	5.67135e-07	43.1374	1.57599	4.14788e-06	1.01921e-05	35.9855
ENSMUSG00000004821	Tmed11	0	0	0	0	0	0	0	0	0	0	0	0	0	0	0	0	0	0	0	0	0	0	0	0	0	NA	NA	NA	NA	NA	NA	NA	NA	NA	NA	NA	NA	NA	NA	NA	NA	NA	NA	NA	NA	NA	NA	NA
ENSMUSG00000004837	Grap	1.78473	2.9737	2.40794	0.9115	1.65744	3.29516	1.99406	1.13734	0.169099	0.149873	0.285167	-0.194249	0.290266	-0.168101	-0.380966	0.0913976	0.32898	-0.278153	0.0148046	1.25069	-0.293245	-0.415303	7.21131	8.74739	8.85117	1.64808	0.127061	-0.152557	0.0218775	0.180714	8.26996	0.460734	1.79669	0.496918	NA	0.416444	1.51431	0.585215	NA	1.35222	-0.329384	0.854619	0.891473	518.464	-10.0178	1.28749e-41	1.22697e-40	0
ENSMUSG00000004842	Pou1f1	0	0	0	0	0	0	0	0	0	0	0	0	0	0	0	0	0	0	0	0	0	0	0	0	0	NA	NA	NA	NA	NA	NA	NA	NA	NA	NA	NA	NA	NA	NA	NA	NA	NA	NA	NA	NA	NA	NA	NA
ENSMUSG00000004843	Chmp2b	6.23075	6.00233	5.76964	5.41492	5.95141	4.88093	5.42964	4.94258	5.20482	5.21841	6.75059	6.86535	6.98817	7.00789	6.99792	6.91587	7.08573	7.19841	7.54861	7.13189	7.04757	6.76071	7.24927	7.16792	7.46142	5.50454	6.86803	6.97389	7.27758	6.98005	7.29287	275.726	-0.164159	0.246829	0.481585	274.358	-0.416726	0.0349181	0.0791795	330.486	0.0851233	0.635173	0.707248	324.061	-0.262071	0.0995103	0.138909	198.775
ENSMUSG00000004846	Plod3	4.92581	5.32009	6.40699	5.43194	5.96405	5.77694	5.0746	5.63361	5.77358	5.85982	5.53742	5.35544	5.35624	5.43709	5.53879	5.34458	5.77298	5.52513	5.5922	7.00558	7.07344	6.98284	8.86261	9.08025	8.88179	5.61674	5.41637	5.44016	5.6301	7.02062	8.94155	70.3242	-0.058475	0.80836	0.913193	66.0791	-0.121515	0.638813	0.752549	221.107	-1.95768	2.90291e-29	2.88138e-28	822.33	-4.31618	1.84136e-174	2.23131e-172	46.3652
ENSMUSG00000004849	Ap1s1	6.99747	6.992	7.33224	6.96221	7.10032	7.0919	6.82256	6.28717	6.56149	6.81219	8.15689	8.32443	8.30459	8.23657	8.14833	8.13761	7.31426	7.2337	7.08368	7.32229	7.18132	7.04128	7.41521	7.41116	7.4513	6.89596	8.26197	8.17417	7.21054	7.18163	7.42589	737.234	0.100701	0.351505	0.593458	460.977	1.57878	4.30124e-25	1.19086e-23	650.975	1.6981	6.61696e-29	6.48899e-28	591.408	1.43101	1.47686e-29	1.02399e-28	300.548
ENSMUSG00000004864	Mapk13	1.5022	0.172631	-0.130007	-0.0230872	0.564182	-0.258349	-0.0322342	-0.443925	-0.501452	0.777575	0.241237	-0.0964436	0.0312606	-0.587639	-0.631406	-0.523125	1.89029	0.626153	1.39665	-0.623295	-0.614358	-0.289409	-0.584542	-0.591974	-0.58425	0.162754	0.0586847	-0.580723	1.30436	-0.509021	-0.586922	1.10987	3.07552	0.113211	NA	7.50473	-2.59011	0.00287982	0.00909836	1.60714	2.88416	0.0964572	0.144161	1.25651	3.43525	0.0692915	0.100502	4.55651
ENSMUSG00000004865	Srpk1	7.16817	6.37351	6.47056	5.84784	6.1833	6.0417	6.3329	6.74858	6.48338	6.47514	6.69824	6.79141	6.8164	6.59589	6.48856	6.78562	6.37562	6.43147	6.43418	5.53466	5.62485	5.6405	6.2187	6.37669	6.39806	6.41251	6.76868	6.62336	6.41376	5.6	6.33115	228.223	0.194763	0.206227	0.430035	179.27	0.638068	0.000214214	0.000877163	199.648	1.91117	1.68108e-26	1.4934e-25	209.554	0.909699	2.22106e-08	6.42342e-08	115.008
ENSMUSG00000004872	Pax3	-0.656528	-0.737393	-0.360437	-0.240331	-0.425926	0.798213	0.145049	-0.711477	0.352755	-0.0790003	-0.986291	-1.00446	-0.916546	-0.870517	-0.929526	-0.78973	-0.684017	-0.901921	-0.814467	1.52801	1.58579	1.671	-0.866482	-0.0139429	-0.866103	-0.191508	-0.969098	-0.863258	-0.800135	1.59493	-0.582176	0	NA	NA	NA	0	NA	NA	NA	19.2243	-7.86803	2.6459e-10	1.07656e-09	0.403869	-2.50707	0.493675	NA	0
ENSMUSG00000004880	Lbr	4.38228	4.37009	5.59943	5.03509	4.60212	4.82103	4.59735	4.79027	3.86182	3.83028	3.25723	3.73621	3.80063	3.24211	4.01555	3.6353	4.22997	4.28671	4.18514	4.34861	4.13231	4.31041	6.6454	6.62583	6.64804	4.58898	3.59802	3.63099	4.23394	4.26378	6.63976	18.3183	-0.128934	0.790347	0.903543	21.9058	-0.805193	0.0656036	0.133693	31.1141	-0.767947	0.0399213	0.065729	159.302	-3.91525	1.36389e-60	2.08596e-59	15.5034
ENSMUSG00000004885	Crabp2	0.480802	-0.195747	0.0952361	0.197665	0.74421	1.67659	0.714376	0.420743	0.931888	0.909632	0.043078	-0.16125	0.00534294	0.0969313	-0.313052	-0.227897	-0.169455	0.764387	0.213457	0.566823	0.0258753	0.175357	-0.277112	0.348048	0.906819	0.597539	-0.0376098	-0.148006	0.269463	0.256018	0.325919	0.692393	0.807039	0.717659	NA	1.43758	-1.52027	0.342619	0.484098	1.87404	-1.11346	0.422435	0.508987	1.99388	-1.52458	0.29847	0.362346	0.854199
ENSMUSG00000004891	Nes	2.57822	2.37086	5.53853	1.66546	1.46475	2.09422	3.7496	3.34773	4.00962	3.10013	2.14807	2.21155	2.21524	0.805459	0.668872	1.53221	1.18484	1.44526	2.61641	3.2845	3.32014	2.96475	4.98281	4.87558	5.07714	2.99191	2.19162	1.00218	1.74883	3.1898	4.97851	3.89843	3.77605	0.00773829	0.0391353	5.04583	0.709782	0.461777	0.600349	16.4007	-1.35346	0.00564692	0.0109687	56.6933	-3.72295	1.81863e-26	1.1423e-25	1.51978
ENSMUSG00000004892	Bcan	7.80257	8.18491	8.26948	8.57072	7.92216	8.23111	7.80877	8.06013	7.70337	7.9601	5.84177	5.66313	5.57304	6.5255	6.10216	6.11606	7.42148	7.41086	7.11539	11.2627	11.4269	11.5503	6.22481	6.30908	6.35417	8.05133	5.69265	6.24791	7.31591	11.4133	6.29602	75.9594	-0.940025	0.000219129	0.00189103	142.357	-2.32769	9.24052e-25	2.48962e-23	5914.36	-7.42527	0	0	76.045	-0.658375	0.00620308	0.0108526	114.031
ENSMUSG00000004894	Hapln2	1.34869	2.49544	0.902635	3.63328	3.22191	3.66711	2.64668	1.27015	2.66923	3.37835	1.03611	0.796962	0.688003	0.374919	0.649815	0.504268	0.642045	0.327098	1.61479	1.3667	2.43894	2.03371	2.15664	2.10652	0.836469	2.52335	0.840359	0.509668	0.86131	1.94645	1.69988	0.996292	1.7416	0.374622	NA	1.53366	-0.0315847	0.985289	0.991576	6.42922	-2.23458	0.0107069	0.019725	4.5077	-1.86768	0.0649234	0.0946979	0.636857
ENSMUSG00000004895	Prcc	4.5006	5.12687	4.34165	5.93088	5.01234	5.29157	4.88392	4.08445	4.98122	5.20028	4.92398	5.13073	5.09146	5.10717	4.97286	4.57282	5.63124	5.70564	5.64538	4.76731	5.01456	4.81565	5.62599	5.68608	5.69117	4.93538	5.04872	4.88428	5.66075	4.86584	5.66775	61.0287	0.165971	0.534112	0.743198	77.4783	-0.710305	0.00257083	0.0082277	72.3334	0.516006	0.0394566	0.0650623	91.1525	-0.55803	0.00938101	0.0159416	51.0591
ENSMUSG00000004896	Rrnad1	2.93557	3.88277	3.49131	5.10332	3.80108	3.21439	3.11693	3.367	3.70286	3.49067	3.69426	3.74808	3.73817	3.98169	3.78067	3.48998	3.78753	3.37209	3.18025	3.46347	3.76893	3.49523	2.59745	3.40521	3.02751	3.61059	3.72683	3.75078	3.44663	3.57588	3.01006	29.2473	-0.107799	0.765043	0.888671	21.6348	0.62323	0.154786	0.264967	31.9251	0.474654	0.172986	0.240323	22.1065	1.40468	0.00203785	0.00381352	15.4222
ENSMUSG00000004897	Hdgf	5.60268	6.14307	5.70081	5.01331	6.42461	6.16014	5.59878	4.86769	5.61427	5.41981	6.26315	6.20054	6.3058	6.62054	6.13945	6.17864	6.85455	6.66196	6.80188	6.92652	7.0595	7.01127	6.73718	6.69243	6.86906	5.65452	6.2565	6.31288	6.7728	6.9991	6.76622	160.819	-0.126292	0.506278	0.723594	171.707	-0.540885	0.00202882	0.00668355	270.519	-0.764544	5.05511e-07	1.60834e-06	201.073	-0.391447	0.0143106	0.0235811	123.075
ENSMUSG00000004902	Slc25a18	6.34703	5.95037	5.53685	5.67083	5.90408	6.33867	5.67268	6.05939	5.89444	6.17742	3.68582	3.36348	2.90209	2.97617	2.18932	2.27143	4.52826	4.04567	4.06999	8.99679	8.97685	9.25467	4.34148	4.58175	4.10533	5.95518	3.31713	2.47897	4.21464	9.0761	4.34285	6.21509	2.20022	0.0220738	0.0892407	15.8385	-1.18171	0.0310739	0.0719184	1211.12	-7.40514	1.98459e-185	2.91931e-183	20.2598	-1.26941	0.00804795	0.0138648	8.50912
ENSMUSG00000004929	Thop1	5.79029	5.50224	4.07901	4.96762	6.3263	5.39202	5.57681	5.51964	5.51669	5.75835	6.5363	6.47903	6.16528	6.29779	6.26977	6.03919	5.69152	5.80797	5.02659	5.43104	5.24304	5.66628	5.42199	5.41403	4.92438	5.4429	6.39354	6.20225	5.5087	5.44679	5.25347	190.546	0.24449	0.165884	0.374218	130.848	1.32379	5.9472e-06	3.22943e-05	180.771	1.55477	1.07892e-12	5.13602e-12	148.784	1.88939	6.16566e-15	2.50135e-14	79.8135
ENSMUSG00000004931	Apba3	2.88018	2.44056	4.35243	3.67758	3.92266	2.86802	3.55365	2.98929	3.12685	3.78041	3.15402	2.87733	3.01232	2.86175	2.56732	3.44263	3.51187	3.2718	2.76224	4.07395	4.12999	4.43541	4.03163	4.10116	3.7228	3.35916	3.01455	2.95723	3.18197	4.21312	3.95186	13.5901	0.0916698	0.867487	0.944925	13.0636	-0.14004	0.80013	0.867559	36.0323	-1.63259	4.44236e-06	1.29226e-05	25.0832	-1.18933	0.00274942	0.00505562	9.07647
ENSMUSG00000004933	Matk	5.43985	5.97909	6.74918	4.89514	5.75672	5.96867	5.64661	4.72104	5.26909	5.60831	6.14395	6.0629	5.81937	6.50284	6.16213	5.61521	4.63397	4.40386	4.13025	4.40354	4.23476	3.92973	5.71007	5.92332	6.24384	5.60337	6.00874	6.09339	4.38936	4.18934	5.95907	162.001	-0.208903	0.344884	0.58727	80.1603	2.57648	2.68958e-16	4.31471e-15	111.433	2.95022	6.60485e-27	5.95823e-26	152.011	0.369379	0.0977812	0.13681	61.5542
ENSMUSG00000004934	Pias4	4.90844	4.66059	4.66897	4.62058	5.04441	2.56257	4.80275	5.0209	4.25367	4.76169	4.99543	4.97797	4.67567	4.76914	4.6273	4.61501	4.72847	4.68843	4.48243	4.39913	4.50154	4.58528	5.17895	4.75864	5.21516	4.53046	4.88302	4.67048	4.63311	4.49531	5.05091	57.8428	0.316221	0.241221	0.47589	48.9288	0.545855	0.0772906	0.151993	65.143	0.837896	0.00171642	0.00363592	70.8603	0.0746729	0.782396	0.820032	29.9859
ENSMUSG00000004936	Map2k1	9.37024	9.12684	8.69958	8.73097	8.795	8.78204	8.95168	8.88287	8.73565	8.90844	9.30245	9.27613	9.19275	9.26446	9.2723	9.28512	8.89629	8.57947	8.37613	8.53667	8.64732	8.36904	9.02174	9.15596	9.29447	8.89833	9.25711	9.27396	8.6173	8.51768	9.15739	1341.98	-0.0334869	0.710293	0.858656	896.789	1.01902	2.6542e-08	2.01716e-07	1225.1	1.2596	1.67604e-19	1.12111e-18	1301.66	0.441432	0.000398933	0.000813407	627.666
ENSMUSG00000004937	Sgta	6.8373	6.47689	7.08346	6.26901	6.155	6.36377	6.51074	5.53351	6.35276	6.2444	7.35109	7.39596	7.25209	7.26674	7.39378	7.03799	7.59447	7.34861	6.91876	7.20954	7.20777	7.53982	7.0773	7.15327	7.10062	6.38268	7.33305	7.23284	7.28728	7.31904	7.1104	346.646	0.0950907	0.49951	0.719522	306.459	0.192013	0.381667	0.523957	430.93	0.255611	0.116742	0.17027	336.352	0.618294	8.28371e-06	1.97777e-05	203.558
ENSMUSG00000004939	Nmrk2	0	0	0	0	0	0	0	0	0	0	0	0	0	0	0	0	0	0	0	0	0	0	0	0	0	NA	NA	NA	NA	NA	NA	NA	NA	NA	NA	NA	NA	NA	NA	NA	NA	NA	NA	NA	NA	NA	NA	NA
ENSMUSG00000004945	Tmem242	4.6085	4.43724	2.72782	2.8696	4.78056	5.76096	4.72664	4.79539	4.677	4.69051	4.66578	4.65146	4.63209	4.38027	4.26304	4.26858	5.31468	5.45055	5.32489	5.80999	5.77365	6.14062	4.21136	4.59682	4.3329	4.40742	4.64978	4.30396	5.36337	5.90809	4.38036	41.9615	0.504351	0.0983455	0.264611	62.4992	-0.867115	0.000559045	0.00209485	123.315	-1.51024	6.47145e-12	2.92541e-11	44.9925	0.695019	0.0210168	0.0336255	38.8532
ENSMUSG00000004947	Dtx2	3.07687	1.89965	4.37334	1.86583	2.35693	3.55284	3.1461	1.96211	2.9295	2.90057	3.20555	3.03484	2.99911	2.56519	2.92295	2.50499	2.84062	2.76475	2.56388	2.67672	3.34594	2.92167	3.87501	3.33423	3.87721	2.80637	3.07983	2.66438	2.72308	2.98144	3.69548	14.6918	0.631711	0.220872	0.449457	12.9863	0.787546	0.15228	0.261891	21.0267	0.370445	0.403515	0.489422	26.7736	-0.680215	0.0824382	0.117653	6.84113
ENSMUSG00000004948	Zp3	-2.08688	-2.09464	-2.06537	-2.05664	-2.07013	-2.07584	-2.10882	-2.09099	-2.09792	-2.099	-2.1306	-2.13078	-2.12554	-2.11654	-2.12826	-2.10225	-2.08888	-2.12258	-2.10648	-2.06449	-2.062	-2.07001	-2.11578	-2.1176	-2.11571	-2.08462	-2.12898	-2.11568	-2.10598	-2.0655	-2.11637	0	NA	NA	NA	0	NA	NA	NA	0.549696	-2.73374	0.28362	NA	0	NA	NA	NA	0
ENSMUSG00000004951	Hspb1	0.739666	-0.629147	-0.335	-0.247323	-0.382807	-0.440244	0.0577369	0.650102	0.712652	0.48216	-0.7626	-0.423969	-0.735244	-0.715096	-0.74062	-0.675506	0.408025	0.206592	-0.219091	-0.735975	-0.730812	-0.0730384	-0.713248	-0.717674	-0.713074	0.0607797	-0.640604	-0.710407	0.131842	-0.513275	-0.714665	0.173797	0.569037	0.888221	NA	1.94279	-3.20127	0.0561185	0.117397	0.705856	-0.929254	0.724738	0.784197	0.196036	0.923056	0.819666	NA	1.2522
ENSMUSG00000004952	Rasa4	3.47384	1.07145	3.44958	1.64508	3.03619	3.13587	3.00586	2.69678	3.53026	3.31254	1.78125	1.65838	2.50587	0.763325	0.615767	1.51019	2.51394	3.34354	2.86704	2.06941	1.63892	2.53297	5.16561	5.538	5.86727	2.83575	1.98183	0.963092	2.90817	2.08043	5.52362	3.39661	3.5145	0.0173067	0.0739855	9.53347	-1.45716	0.0373516	0.0838753	7.59969	0.0246461	0.973768	0.981107	90.2615	-4.80919	3.54714e-33	2.73109e-32	4.97814
ENSMUSG00000004961	Syt5	8.22699	7.68288	7.18524	6.79875	7.21789	7.31253	7.7442	7.78428	7.37485	7.55071	8.59213	8.61492	8.56132	8.6133	8.53595	8.3729	6.10859	5.53108	5.62778	6.91689	7.01868	6.32119	5.84981	6.27564	5.95146	7.48783	8.58946	8.50739	5.75582	6.75225	6.02563	1005.64	0.0800295	0.433803	0.668102	494.81	4.22936	2.43063e-89	4.94474e-87	781.483	2.66597	6.89792e-36	8.59109e-35	625.923	3.84627	1.18838e-115	5.31833e-114	319.869
ENSMUSG00000004980	Hnrnpa2b1	8.27449	8.98926	9.49061	8.38482	8.67837	8.22443	8.27133	8.22584	8.25268	8.26632	9.3307	9.35054	9.46661	9.69946	9.79496	9.81028	9.55534	9.67739	10.0191	9.91371	9.68874	9.79164	10.3957	10.2181	10.189	8.50582	9.38262	9.76823	9.75062	9.79803	10.2676	1678.67	-0.532111	8.81362e-09	1.75252e-07	1415.03	-0.360025	0.0372535	0.083725	2006.14	-0.313214	0.0141618	0.0255592	2187.46	-0.863546	2.97241e-13	1.11993e-12	1167.09
ENSMUSG00000004988	Fxyd4	-2.33535	-2.33838	-2.32698	-2.32358	-2.32883	-2.33106	-2.3439	-2.33695	-2.33965	-2.34007	-2.354	-2.35402	-2.35041	-2.3469	-2.35147	-2.34134	-2.33613	-2.32534	-2.34299	-2.35055	-2.34958	-2.35221	-2.34661	-2.34732	-2.34658	-2.33447	-2.35281	-2.34657	-2.33482	-2.35078	-2.34683	0	NA	NA	NA	0.152475	-2.24404	0.581531	NA	0	NA	NA	NA	0	NA	NA	NA	0.106445
ENSMUSG00000004994	Ccdc130	3.75583	3.64944	4.25165	4.34179	4.78905	4.08073	2.75586	3.5078	3.17733	3.88447	4.20243	3.97248	4.18305	4.39141	3.96699	3.86065	3.24329	4.05466	3.31923	3.55259	3.9978	4.06251	4.23602	4.00418	4.4452	3.8194	4.11932	4.07302	3.53906	3.87097	4.22847	37.3918	0.00475299	0.98859	0.99475	25.665	0.863711	0.0595059	0.123289	40.7869	0.589497	0.0752956	0.115537	40.7613	0.12846	0.687003	0.737419	17.4591
ENSMUSG00000004996	Mri1	3.04839	3.37018	2.88713	4.09411	2.78914	4.16946	3.81905	3.92029	3.80095	3.59079	3.5593	3.8251	3.6912	4.07563	3.98645	3.75191	3.66133	3.69988	3.82969	3.88661	3.9309	4.18381	4.23324	4.76732	4.65101	3.54895	3.69187	3.938	3.7303	4.00044	4.55052	28.8361	-0.417141	0.250511	0.485657	21.6769	0.102316	0.807113	0.872166	35.2092	-0.231952	0.491334	0.574513	42.106	-0.994703	0.00234299	0.00434993	17.4148
ENSMUSG00000005034	Prkacb	10.068	9.64954	9.12896	9.36088	9.47797	9.25386	10.0084	10.0029	9.70697	9.98746	9.59745	9.54159	9.59441	9.1205	9.14596	9.15699	9.01766	8.92346	9.06594	8.76227	8.6362	8.42643	8.92075	8.84864	8.98731	9.66449	9.57782	9.14115	9.00235	8.6083	8.9189	1368.11	0.580319	4.00878e-11	1.02726e-09	1126.06	0.946819	1.25221e-16	2.06306e-15	1425.48	1.58316	7.43341e-27	6.69088e-26	1326.47	1.2143	1.50666e-30	1.0696e-29	607.679
ENSMUSG00000005043	Sgsh	1.58989	2.8493	1.91905	2.05614	3.29188	4.16297	3.40227	3.13785	3.35519	3.43236	2.69488	2.50446	2.21343	2.0931	2.38883	1.37737	3.63169	3.75629	3.62287	4.73651	4.73588	4.89194	5.25518	5.68642	5.91792	2.91969	2.47092	1.9531	3.67029	4.78811	5.61984	5.58794	0.902979	0.295564	0.536369	14.8272	-1.71342	0.000905836	0.00323872	50.0433	-3.1442	8.26466e-19	5.38275e-18	86.2158	-4.20828	4.00193e-32	2.97932e-31	9.08845
ENSMUSG00000005045	Chd5	8.42887	8.51634	8.39362	7.57735	8.32087	7.85947	7.84779	7.36521	7.73856	7.9665	8.17035	7.93358	7.86593	7.79155	7.72764	7.58779	6.98796	6.69186	6.55276	6.23009	6.22237	5.91929	5.60054	6.16954	5.89372	8.00146	7.98995	7.70233	6.74419	6.12391	5.88793	531.266	0.370063	0.00495263	0.027203	345.565	1.8931	7.25995e-21	1.56061e-19	443.745	2.89496	8.50984e-53	1.73903e-51	373.533	3.30469	2.97205e-53	3.8376e-52	194.889
ENSMUSG00000005054	Cstb	4.51502	4.89265	5.26038	5.29637	4.22863	4.72001	4.62323	4.29387	4.67435	4.43645	5.55571	5.74584	5.48146	5.65986	5.79256	5.65528	6.53368	6.84139	6.92293	6.79465	6.54035	6.72059	7.40468	7.32144	7.28472	4.69409	5.59434	5.70257	6.766	6.6852	7.33695	99.1912	-0.16082	0.445338	0.677536	157.18	-1.44729	7.10046e-12	8.03136e-11	204.611	-1.22412	5.43302e-11	2.31439e-10	266.035	-1.99451	3.17316e-34	2.52586e-33	112.534
ENSMUSG00000005057	Sh2b2	2.09956	0.897982	1.30299	3.98679	2.03075	2.71443	2.76182	2.54533	2.97972	1.80829	1.42102	1.71629	1.94356	1.41426	1.58071	0.796939	0.976492	1.87973	1.63569	2.59245	2.59293	3.23143	4.505	4.90899	5.1239	2.31277	1.69362	1.26397	1.4973	2.8056	4.84597	3.41291	0.874591	0.418174	0.655	3.36992	0.465222	0.664451	0.772585	12.5203	-1.7079	0.00445382	0.00880198	57.2368	-4.44059	3.71632e-25	2.23533e-24	1.56775
ENSMUSG00000005069	Pex5	6.88798	6.48654	5.66358	6.52983	6.13359	6.49231	7.33457	6.64222	6.87419	7.2043	6.24558	6.46726	6.34199	6.26846	6.25743	6.08321	6.2151	6.33783	6.26116	5.89407	6.02249	6.1275	6.13176	6.13506	6.0316	6.62491	6.35161	6.20303	6.27136	6.01469	6.09947	153.18	0.184643	0.299678	0.540834	134.983	0.26458	0.184086	0.302928	171.019	0.72585	0.000118163	0.00029295	150.494	0.673578	0.00030089	0.000621629	86.7418
ENSMUSG00000005078	Jkamp	5.3254	5.23883	5.17742	6.69793	5.59241	6.12807	5.49786	4.96541	5.66703	5.92495	6.25272	6.17692	6.10333	6.41644	6.33709	6.23849	6.48196	7.03126	7.06157	6.54378	6.77227	6.68973	6.28181	6.1742	6.36302	5.62153	6.17766	6.33067	6.85826	6.66859	6.27301	159.773	-0.230386	0.172148	0.383115	182.719	-0.826223	0.000195998	0.000811093	224.874	-0.4214	0.0118079	0.0215997	156.824	0.183626	0.301663	0.365912	134.282
ENSMUSG00000005087	Cd44	4.1581	3.34081	3.26481	4.68388	4.09039	4.42279	3.0613	3.71498	3.61158	2.06741	3.48735	3.14734	2.3502	1.31757	4.10825	2.33121	3.16207	2.09345	2.68079	6.54253	6.90306	6.70855	4.8506	4.82632	4.53176	3.6416	2.99496	2.58568	2.64544	6.71805	4.73623	13.6392	-0.132442	0.933595	0.974788	9.25117	1.01735	0.202485	0.326362	228.033	-4.59211	1.90926e-62	4.9959e-61	38.9558	-2.02652	3.32084e-07	8.87417e-07	6.70521
ENSMUSG00000005089	Slc1a2	11.6115	12.0819	11.5295	12.0542	11.4876	11.914	11.7336	11.667	11.6345	11.5235	10.8821	10.7481	10.9166	10.0767	10.0163	9.92019	9.35182	9.33146	9.35568	15.0603	15.2118	15.2431	10.035	10.2643	10.147	11.7237	10.849	10.0044	9.34632	15.1717	10.1488	2303.59	1.22792	3.0115e-36	3.73705e-34	1721.2	2.48363	5.47636e-93	1.22018e-90	81516.1	-5.23702	0	0	2551.91	1.33304	1.34341e-26	8.46846e-26	606.796
ENSMUSG00000005102	Eif2ak4	5.54066	5.76006	6.18677	5.79471	5.62324	6.27352	5.59312	5.60928	5.69677	5.85035	4.92175	4.8619	4.82442	5.08636	5.18608	5.07879	5.3142	5.12464	5.21639	5.13207	4.68607	4.98077	5.11035	5.63013	5.38206	5.79285	4.86936	5.11708	5.21841	4.93297	5.37418	57.203	-0.386621	0.135226	0.327361	51.2621	-0.333475	0.22848	0.357824	61.9503	0.131119	0.629618	0.702258	66.5894	-0.453017	0.088333	0.125226	40.1142
ENSMUSG00000005103	Wdr1	9.25277	8.98873	9.40571	8.78689	9.12306	8.81872	9.13031	9.32923	9.13012	9.08847	8.79465	8.8436	8.79596	9.04682	9.10939	9.21355	8.70146	8.45814	8.20813	8.96557	8.99979	9.19634	10.005	9.86234	10.0356	9.1054	8.8114	9.12325	8.45591	9.0539	9.96765	986.989	-0.441905	7.5445e-06	9.15035e-05	619.987	0.649457	0.000291242	0.00115616	1124.7	-0.0928602	0.465409	0.549949	1591.81	-1.24454	2.48602e-30	1.75615e-29	521.164
ENSMUSG00000005107	Slc2a9	-0.212854	-0.278113	0.0775889	0.195403	0.0133486	-0.0638302	-0.364841	1.43759	0.339804	0.719054	-0.514784	-0.530763	-0.45109	0.628647	0.401112	-0.325949	-0.239818	-0.437268	-0.351299	0.2276	0.82977	0.920002	2.22878	1.95917	2.32502	0.186315	-0.498879	0.234604	-0.342795	0.659124	2.17099	1.17124	-4.27936	0.0379473	NA	0	NA	NA	NA	2.50488	-4.92883	0.00240966	0.00498479	12.2572	-7.41939	6.70711e-09	2.0007e-08	0.720645
ENSMUSG00000005124	Ccn4	-0.491522	0.551087	-0.290661	-0.209184	-0.335087	-0.388462	0.0684142	-0.529878	0.682941	-0.0996472	0.44914	0.168686	0.387339	-0.286652	-0.645047	-0.593566	-0.51017	0.056634	-0.18491	-0.641465	-0.130637	-0.647799	-0.623734	-0.627213	-0.623597	-0.1042	0.335055	-0.508422	-0.212815	-0.473301	-0.624848	3.06835	3.45237	0.0194466	0.0811154	3.27976	1.54297	0.18363	0.302359	4.10242	3.30289	0.0119475	0.0218454	3.20904	4.78061	0.00141091	0.00269571	0.641309
ENSMUSG00000005125	Ndrg1	6.63787	6.14405	6.78765	6.74279	6.50378	6.14486	7.03419	7.13416	6.84654	7.16099	5.03152	4.73893	4.75824	5.17469	5.37718	5.68454	4.08019	4.16945	4.13577	5.1403	5.80288	4.82945	5.28233	5.26323	5.2846	6.71369	4.8429	5.41214	4.12847	5.25754	5.27672	62.8499	-0.841461	0.00181932	0.0118189	27.6894	1.37247	0.000942828	0.00335428	69.0581	-0.459604	0.188242	0.258178	56.4846	-0.314471	0.245174	0.305002	30.4249
ENSMUSG00000005131	4930550C14Rik	-0.542201	-0.638713	-0.274752	2.06557	-0.333907	-0.404975	-0.74006	-0.593272	-0.679472	0.687936	-0.564154	-0.610066	-0.815441	-0.776909	-0.826068	-0.706204	-0.56703	-0.80334	-0.72826	1.29687	1.36737	0.891883	-0.265714	-0.28991	0.695217	-0.145385	-0.66322	-0.769727	-0.699543	1.18538	0.0465309	0.188402	0.646029	0.872723	NA	0.170455	0.362401	0.928596	NA	7.30135	-4.62345	9.93655e-05	0.000248574	1.70037	-2.61567	0.115357	0.158033	0
ENSMUSG00000005142	Man2b1	7.07116	6.95406	6.6613	7.9857	7.84364	7.46877	6.55946	6.93828	6.60383	6.71462	7.22504	6.92535	6.97081	7.08196	6.80062	6.76484	7.1966	7.26575	7.12434	7.45245	7.47688	7.58446	11.9013	12.2133	12.0861	7.08008	7.0404	6.88247	7.19556	7.5046	12.0669	204.888	0.2123	0.229622	0.46096	202.7	-0.0556653	0.771683	0.849777	332.517	-0.396678	0.0171969	0.0305075	8393.59	-6.05069	0	0	130.656
ENSMUSG00000005148	Klf5	2.97051	3.7361	3.31562	3.20991	2.43202	1.67362	2.83463	2.00609	3.00562	3.51869	4.43911	4.36276	4.24889	4.36139	4.49947	4.22856	3.26127	3.04082	2.89857	2.38944	3.07783	2.05795	2.39495	2.70652	1.56394	2.87028	4.35025	4.36314	3.06689	2.50841	2.2218	62.1987	-0.0580626	0.819045	0.918949	34.3772	2.09944	1.79563e-07	1.21823e-06	45.0659	3.00519	2.10324e-13	1.04732e-12	37.5547	3.56407	2.32978e-13	8.8245e-13	24.1589
ENSMUSG00000005150	Wdr83	4.25106	4.28731	2.92142	4.12944	2.2293	4.07696	3.43436	3.75031	4.18445	4.50772	4.29686	3.82108	3.75926	3.82426	4.01754	2.9011	4.58899	3.95442	3.50014	4.21711	3.92893	4.12866	3.79961	4.60022	4.29835	3.77723	3.95907	3.58097	4.01452	4.09157	4.23272	28.214	0.394822	0.347244	0.589532	29.9278	0.0524378	0.910802	0.943219	41.5973	0.0884319	0.794826	0.843215	38.7913	-0.118759	0.75773	0.799178	17.8844
ENSMUSG00000005161	Prdx2	7.81236	7.1926	7.61939	7.22101	7.6536	7.43168	7.84582	8.04337	7.65644	7.96951	8.06088	8.07333	8.05847	7.98794	7.98932	8.23933	9.03599	8.67262	8.54424	8.77966	8.75674	9.09722	7.73751	7.71289	7.69482	7.64458	8.06423	8.0722	8.75095	8.87787	7.71507	546.113	-0.0204066	0.864013	0.94279	665.136	-0.779532	1.15901e-05	5.98321e-05	986.485	-0.852548	5.97924e-09	2.21834e-08	480.864	0.796554	2.77955e-11	9.4837e-11	465.421
ENSMUSG00000005198	Polr2a	8.72004	8.37727	8.40519	7.9042	8.39642	8.22942	8.45804	8.72089	8.41598	8.60323	8.08649	8.12166	8.11917	8.28148	8.27361	8.26005	7.93612	7.90718	7.47414	8.16215	8.03222	8.2817	8.96749	8.89892	9.01156	8.42307	8.10911	8.27171	7.77248	8.15869	8.95932	569.604	-0.240266	0.0226966	0.0910717	390.966	0.612065	0.00113572	0.00395783	642.453	0.171586	0.203906	0.276045	824.152	-0.839911	6.67912e-15	2.70548e-14	298.647
ENSMUSG00000005202	Shbg	-2.33583	-2.33854	-2.32829	-2.32524	-2.32996	-2.33196	-2.34351	-2.33726	-2.33969	-2.34007	-2.35258	-2.3526	-2.34936	-2.34621	-2.35032	-2.34121	-2.33653	-2.34833	-2.34269	-2.32799	-2.34862	-2.35099	-2.34595	-2.34658	-2.34592	-2.33504	-2.35151	-2.34591	-2.34251	-2.34253	-2.34615	0	NA	NA	NA	0	NA	NA	NA	0.187841	-1.24927	0.759488	NA	0	NA	NA	NA	0
ENSMUSG00000005204	Senp3	5.96221	5.32711	4.85066	4.97017	5.20875	5.42666	5.41682	5.1808	5.62714	5.25001	5.48817	5.41446	5.18277	5.04394	5.08084	5.04833	4.64715	5.00819	4.78033	4.85143	4.77011	5.16391	5.10967	5.38439	5.02677	5.32203	5.3618	5.0577	4.81189	4.92849	5.17361	76.4385	0.444432	0.0621257	0.191845	59.9298	0.933963	0.0016494	0.00554954	88.505	0.876883	0.000481711	0.00110329	83.0361	0.585548	0.0185186	0.0299357	34.1594
ENSMUSG00000005220	Corin	0.144853	0.0274125	0.52578	2.92356	1.44352	1.90721	1.82629	0.0829957	1.29663	2.33052	-0.677294	-0.744981	-0.445527	-0.30923	-0.485982	1.18007	6.84685	5.95051	6.02661	-0.450915	0.629443	0.071611	-0.297735	1.34763	-0.296658	1.25088	-0.622601	0.128287	6.27466	0.0833797	0.251077	0.73903	-3.38202	0.203561	NA	89.6172	-10.5933	1.58849e-18	2.94941e-17	0.563747	-2.76323	0.322977	NA	0.807738	-3.50591	0.223429	0.281844	63.1867
ENSMUSG00000005225	Plekha8	2.95715	3.21331	2.97136	3.18915	4.39231	3.25356	3.71111	3.02876	3.94336	3.90952	2.62479	2.92023	2.4042	3.06398	3.08426	2.73312	3.49913	2.89678	3.49371	2.16995	2.34672	1.94932	3.54651	3.16797	2.75097	3.45696	2.64974	2.96045	3.29654	2.15533	3.15515	12.6512	-0.535483	0.326242	0.569087	13.7895	-0.876681	0.121173	0.218373	9.52106	1.31633	0.0460872	0.0748322	14.703	-0.566922	0.293488	0.356792	10.9943
ENSMUSG00000005232	G6pc2	0	0	0	0	0	0	0	0	0	0	0	0	0	0	0	0	0	0	0	0	0	0	0	0	0	NA	NA	NA	NA	NA	NA	NA	NA	NA	NA	NA	NA	NA	NA	NA	NA	NA	NA	NA	NA	NA	NA	NA
ENSMUSG00000005233	Spc25	-0.102034	-0.142466	0.157505	0.265611	0.0985589	0.0277401	-0.208166	0.885872	-0.158666	-0.163847	0.246675	0.299688	0.491249	0.434241	0.262496	0.335387	-0.112691	0.0899605	0.279369	0.89847	0.527324	0.809185	1.93481	1.82496	1.52662	0.0660107	0.345871	0.344041	0.0855462	0.744993	1.76213	2.31493	-0.000752299	0.999512	0.999725	1.46302	1.1101	0.481569	0.617839	4.21062	-0.874564	0.338871	0.423699	9.94126	-2.76725	7.38291e-05	0.000161982	0.995499
ENSMUSG00000005237	Dnah2	0.42177	2.07268	3.51771	1.6776	0.585637	0.521846	1.85369	0.38553	1.29628	0.89765	0.972581	0.877556	0.775244	1.51841	1.105	1.47786	0.404061	0.825488	1.12297	2.39042	2.11973	2.5917	0.946292	0.611522	0.638425	1.32304	0.875127	1.36709	0.784174	2.36729	0.73208	4.18553	-1.11615	0.230512	0.462265	1.98273	0.360676	0.785785	0.858972	12.1857	-2.62745	4.11398e-05	0.000108065	2.30064	0.799059	0.515901	0.580417	2.36229
ENSMUSG00000005251	Ripk4	0.440858	-1.10396	-0.817229	-0.130266	-0.863831	-0.919818	-0.71585	-1.06816	-1.13607	-1.14658	-0.687599	-0.886465	-0.888464	-0.799872	-0.68128	-1.17433	-1.04748	-0.860517	-1.18968	-0.891792	-0.868483	-0.929839	-1.21534	-1.2194	-1.21518	-0.74609	-0.820842	-0.88516	-1.03256	-0.896705	-1.21664	1.1983	0.0910973	0.957174	NA	0.739374	1.10847	0.597201	NA	1.39601	0.643773	0.675141	0.741837	0.73507	2.66948	0.235134	NA	0.444555
ENSMUSG00000005262	Ufd1	6.68551	6.2366	6.92996	5.59	5.73556	6.29103	6.28941	6.41723	6.10947	6.17303	6.85456	6.92259	6.90621	7.08161	7.12778	7.1878	6.44742	6.57103	6.68859	6.5749	6.41322	6.37003	6.7965	6.6431	6.72093	6.24578	6.89445	7.13239	6.56901	6.45272	6.72018	294.582	-0.331994	0.0118115	0.0550218	195.318	0.586051	0.000602061	0.0022399	263.76	0.852898	1.16001e-07	3.89851e-07	247.961	0.547885	0.000249912	0.00052075	155.697
ENSMUSG00000005267	Zfp287	6.02819	5.46899	5.58783	3.49671	5.14986	5.03826	5.66197	5.53836	4.94123	5.51738	4.63335	4.33214	4.37929	4.38574	4.62972	4.63684	4.86724	4.09318	4.26159	4.34148	4.39105	4.44803	3.93238	4.12058	4.33858	5.24288	4.44826	4.55076	4.40734	4.39352	4.13051	42.5583	-0.156967	0.609567	0.795232	34.4599	0.248971	0.529386	0.660827	46.8108	0.345194	0.246517	0.323538	35.7607	0.803674	0.0208325	0.033351	25.3023
ENSMUSG00000005268	Prlr	3.58395	3.68405	5.98856	4.67643	3.31624	4.90428	4.36079	4.69485	4.10368	3.94321	1.62594	1.53719	2.38483	2.47874	3.21151	3.54075	2.81292	3.21472	2.88375	4.05548	4.03042	3.25073	2.49772	2.70641	2.63609	4.3256	1.84932	3.077	2.97046	3.77888	2.61341	9.67073	-2.4577	0.000816207	0.00594178	6.65084	-2.02685	0.0151077	0.03889	20.0549	-3.283	1.56264e-07	5.18909e-07	5.57099	-1.19504	0.158477	0.208772	8.63712
ENSMUSG00000005299	Letm1	8.20475	7.61732	7.25868	7.36455	7.41595	7.02336	7.94276	7.88423	7.59687	7.87566	7.11815	7.11816	7.02124	7.11187	7.1486	6.96503	7.19566	6.87262	6.69346	7.09249	7.075	7.40944	6.8239	6.80592	6.83327	7.61841	7.08585	7.07517	6.92058	7.19231	6.82103	259.91	-0.0102681	0.942291	0.97805	208.515	0.395269	0.0494857	0.105551	328.59	0.0871678	0.605064	0.679517	238.033	0.692377	4.47857e-06	1.09636e-05	144.007
ENSMUSG00000005312	Ubqln1	7.49603	7.86688	7.96832	7.04974	7.55348	7.22222	7.49231	6.67115	7.57701	7.50084	9.00257	8.97443	9.08714	8.92004	9.01234	9.14439	9.28687	9.53591	9.66043	9.08931	9.07211	9.10313	8.99662	8.94923	9.11605	7.4398	9.02138	9.02559	9.4944	9.08818	9.02063	1201.76	-0.0206532	0.83862	0.929174	1285.5	-0.477799	0.00117401	0.00408212	1471.64	0.159297	0.144061	0.205023	1216.87	0.309754	0.00507612	0.00899181	895.752
ENSMUSG00000005320	Fgfr4	-1.75876	-2.08875	-2.01478	-1.99273	-2.0268	-2.04125	-2.12458	-2.07952	-2.09704	-2.09975	-2.18035	-2.18087	-2.16684	-2.14408	-2.17371	-2.10797	-2.07418	-2.15936	-2.11867	-2.01256	-2.16146	-2.17853	-2.14218	-2.14677	-2.142	-2.0324	-2.17602	-2.14192	-2.11741	-2.11752	-2.14365	0	NA	NA	NA	0	NA	NA	NA	0.187841	-1.24927	0.759488	NA	0	NA	NA	NA	0
ENSMUSG00000005338	Cadm3	8.90148	9.28844	8.9054	9.57729	9.38808	9.45676	9.24497	9.30983	9.31962	9.44309	10.515	10.5245	10.5448	10.07	10.1359	10.1338	10.894	10.5542	11.1055	9.30493	9.2807	8.56508	7.97489	8.20184	7.98102	9.2835	10.5281	10.1133	10.8512	9.05024	8.05258	3126.93	0.526658	2.34662e-11	6.22761e-10	3699.3	-0.283924	0.107555	0.198417	2941.31	2.16832	7.44236e-22	5.51606e-21	2237.33	3.79128	3.52841e-201	6.04164e-199	2210.41
ENSMUSG00000005339	Fcer1a	0	0	0	0	0	0	0	0	0	0	0	0	0	0	0	0	0	0	0	0	0	0	0	0	0	NA	NA	NA	NA	NA	NA	NA	NA	NA	NA	NA	NA	NA	NA	NA	NA	NA	NA	NA	NA	NA	NA	NA
ENSMUSG00000005354	Txn2	6.57662	6.60023	5.24753	6.60621	6.70835	6.77752	6.46471	6.87385	6.50909	6.52052	7.07101	7.00742	7.01014	6.961	6.96606	7.17023	7.26857	7.2811	7.24511	7.74863	7.93482	8.13374	7.28543	7.2136	7.28788	6.48846	7.02952	7.03243	7.26492	7.93906	7.2623	267.31	-0.00817256	0.953834	0.982197	253.99	-0.163814	0.26298	0.397486	513.792	-0.981568	3.76909e-10	1.51506e-09	300.505	-0.0053445	0.968853	0.975915	177.004
ENSMUSG00000005355	Casp14	0	0	0	0	0	0	0	0	0	0	0	0	0	0	0	0	0	0	0	0	0	0	0	0	0	NA	NA	NA	NA	NA	NA	NA	NA	NA	NA	NA	NA	NA	NA	NA	NA	NA	NA	NA	NA	NA	NA	NA
ENSMUSG00000005357	Slc1a6	5.02094	3.6972	3.13544	4.74648	5.34289	6.56912	5.52924	5.54643	5.88126	6.46929	4.90323	5.04023	4.66522	5.18837	4.86935	5.54999	9.97233	9.97642	9.82798	5.09227	5.06446	4.57131	4.1967	4.77575	4.67317	5.19383	4.86956	5.20257	9.92558	4.90935	4.54854	58.1713	-0.464123	0.109532	0.284486	1688.21	-6.24008	0	0	58.6802	0.191706	0.528086	0.609069	42.6379	0.790512	0.0193718	0.0312156	1186.81
ENSMUSG00000005360	Slc1a3	9.32303	9.94414	9.30217	9.90483	9.45426	9.77324	9.54421	9.44759	9.40423	9.22235	7.41765	7.09992	7.18095	6.07772	6.16405	6.09915	8.05174	7.42457	7.47028	13.2927	13.41	13.3801	9.03429	8.86241	9.00222	9.53201	7.23284	6.11364	7.64886	13.3609	8.96631	95.5244	2.62713	1.88863e-21	1.19959e-19	185.057	-0.541806	0.0554136	0.116148	25271.3	-7.86909	0	0	545.227	-2.27413	1.50049e-42	1.47272e-41	85.5111
ENSMUSG00000005362	Crbn	8.16399	7.7931	8.01889	7.36866	7.79823	7.41732	8.33031	8.49522	8.3153	8.15295	7.77408	7.87046	7.81369	7.93354	7.94689	8.15914	7.64647	7.69491	7.69923	7.45749	7.30581	7.32707	7.59381	7.55655	7.69554	7.9854	7.81941	8.01319	7.6802	7.36345	7.6153	502.524	-0.272432	0.0237067	0.0939991	365.275	0.347557	0.0103731	0.0281313	455.285	0.885591	2.76114e-10	1.12093e-09	425.957	0.59475	4.46033e-06	1.09241e-05	282.51
ENSMUSG00000005364	Il5ra	0	0	0	0	0	0	0	0	0	0	0	0	0	0	0	0	0	0	0	0	0	0	0	0	0	NA	NA	NA	NA	NA	NA	NA	NA	NA	NA	NA	NA	NA	NA	NA	NA	NA	NA	NA	NA	NA	NA	NA
ENSMUSG00000005370	Msh6	5.20005	5.57027	5.4834	5.84469	5.25289	5.23379	5.60807	5.3034	5.46353	5.51289	5.79821	5.79217	5.82165	5.42515	5.82938	5.7696	5.3696	5.28061	5.70337	5.19329	5.34223	5.35355	6.24063	5.62785	5.76797	5.4473	5.80401	5.67471	5.4512	5.29636	5.87882	114.404	0.143899	0.478295	0.704658	89.2264	0.644629	0.0085534	0.0237704	118.235	0.973075	1.42899e-06	4.36205e-06	129.174	0.153241	0.521186	0.585442	57.8829
ENSMUSG00000005371	Fbxo11	7.50013	7.83624	8.16819	7.43322	7.29713	7.36062	7.64618	7.44138	7.30504	7.33431	8.61401	8.61351	8.67866	8.55924	8.79356	8.85411	7.61161	7.97994	8.07724	7.88013	7.75671	7.68226	7.89548	7.86125	7.86292	7.53224	8.63539	8.73564	7.8896	7.77303	7.87322	996.72	-0.152983	0.165746	0.374087	619.866	1.11899	2.56617e-11	2.76874e-10	846.599	1.40704	5.48959e-27	4.96862e-26	744.335	1.33564	2.6748e-33	2.06753e-32	459.361
ENSMUSG00000005373	Mlxipl	0.117118	-0.00768957	1.57131	0.679047	1.45603	0.318598	-0.241519	0.948066	-0.061246	0.754107	-0.227167	-0.853163	0.128494	-0.369913	-0.563481	-0.132485	0.0853218	0.631489	-0.202667	0.858177	2.61467	1.86903	7.00764	7.23429	7.42714	0.553383	-0.317279	-0.355293	0.171381	1.78062	7.22302	0.272332	1.00002	0.775569	NA	0.550938	-0.802436	0.764997	NA	5.74882	-4.16167	0.00116168	0.00252974	154.715	-9.26726	8.02505e-20	4.00566e-19	0.21289
ENSMUSG00000005374	Tbl2	5.32032	4.71496	5.56784	5.60925	5.17709	5.36097	5.63093	5.23183	5.79259	5.47334	5.2012	5.21317	4.94646	5.07257	4.94777	5.19535	5.72653	5.41105	5.1753	5.3897	5.35707	5.55056	5.29513	5.33962	5.59896	5.38791	5.12028	5.0719	5.43763	5.43244	5.41124	64.2772	0.0965892	0.705817	0.856439	66.7676	-0.277835	0.327844	0.46906	91.7702	-0.184578	0.418567	0.505076	77.1491	-0.0946163	0.700034	0.7485	45.3915
ENSMUSG00000005378	Bud23	5.23586	5.42231	5.62122	4.56969	4.66348	5.60138	5.49853	5.345	4.92405	5.04707	5.16059	4.99038	4.72227	4.53159	4.87755	4.97843	4.66285	4.75031	4.91074	4.71097	4.72423	4.73122	5.51656	5.68232	5.61314	5.19286	4.95775	4.79586	4.77464	4.72214	5.60401	56.7673	0.249067	0.381282	0.620915	47.9114	0.446736	0.16228	0.274349	65.8022	0.632847	0.0188021	0.0331033	86.4818	-0.568827	0.0174347	0.0283435	30.3426
ENSMUSG00000005397	Nid1	4.59557	4.08337	4.83483	2.04507	4.10061	4.85625	4.81575	4.95167	4.594	5.1888	1.92992	2.37665	1.86388	1.11724	0.968965	1.31932	1.52419	2.63705	1.25731	5.5003	5.82332	5.19412	2.82918	3.34564	3.19382	4.40659	2.05682	1.13518	1.80618	5.50591	3.12288	2.25119	4.11467	0.0106247	0.0504559	3.25367	0.488925	0.705499	0.802649	89.7615	-4.80078	6.84547e-32	7.38749e-31	9.86789	-1.47521	0.0205276	0.0328863	0.85156
ENSMUSG00000005410	Mcm5	3.77987	2.77403	2.13475	3.44174	4.70922	2.56768	3.81977	4.18986	3.3397	3.52829	4.35814	3.91602	3.77776	3.73655	3.51205	2.95057	4.25719	3.3529	3.40423	3.08081	3.14981	2.83152	5.22349	4.80148	4.58805	3.42849	4.01731	3.39973	3.67144	3.02071	4.87101	29.1046	0.862152	0.0330724	0.120085	28.6006	0.705447	0.138921	0.243542	31.5594	1.88049	5.85114e-06	1.682e-05	61.5916	-0.886871	0.00657741	0.0114744	14.2698
ENSMUSG00000005413	Hmox1	1.20804	1.08617	1.54951	1.68552	1.4743	2.57415	2.41284	1.14331	3.03606	1.98162	2.53679	2.62466	2.43971	2.8926	2.26056	3.42994	1.17651	2.52608	1.79985	4.41537	4.48667	4.68237	6.12865	5.55026	5.83803	1.81515	2.53372	2.86103	1.83415	4.52813	5.83898	13.4273	-0.567139	0.309539	0.551874	6.5657	1.04439	0.216241	0.343058	47.0712	-2.56221	2.3252e-14	1.22195e-13	113.987	-4.18404	1.91903e-41	1.81892e-40	6.41363
ENSMUSG00000005417	Mprip	10.5961	10.2211	9.53826	9.04637	9.22576	9.14721	11.5582	10.1836	9.62013	10.1477	7.89784	7.64009	7.44131	8.06842	8.18476	8.06662	8.84453	8.72082	8.88054	7.67734	7.65598	7.88054	6.91715	7.67294	7.42604	9.92844	7.65974	8.1066	8.8153	7.73795	7.33871	384.407	-0.644439	3.63132e-05	0.00037668	509.222	-1.45854	2.98951e-14	4.14662e-13	371.141	0.152919	0.430163	0.516487	268.991	0.769087	0.0043544	0.00777632	406.172
ENSMUSG00000005442	Cic	7.36634	6.73059	6.74817	7.14599	7.13357	7.47345	7.33403	6.67118	6.86788	6.66497	6.9009	6.83115	6.62651	6.73065	6.70112	6.31713	6.5021	6.27295	6.31242	6.22343	6.56012	6.46194	7.00703	7.25007	7.34102	7.01362	6.78619	6.58297	6.36249	6.41516	7.19937	202.867	0.240917	0.169288	0.37889	158.784	0.790332	0.000118883	0.000517287	228.537	0.77465	3.93559e-05	0.000103612	274.176	-0.249603	0.15445	0.204253	98.1976
ENSMUSG00000005447	Pafah1b3	4.27802	3.95129	2.43811	2.57714	3.62631	4.04866	3.69523	3.74136	3.85349	4.37417	4.22885	4.61195	4.51256	3.72482	3.58001	3.53411	5.45826	5.36603	5.06072	4.24918	4.21979	3.89097	5.19431	5.22034	5.71065	3.65838	4.45112	3.61298	5.295	4.11998	5.3751	33.7997	1.2752	0.000523054	0.00404266	65.6571	-1.01311	0.00035304	0.00137886	50.0271	0.739516	0.0172578	0.0305956	80.8603	-0.98958	0.000308887	0.000637732	36.8673
ENSMUSG00000005465	Il27ra	-1.19901	-1.24088	-1.083	-1.03594	-1.10866	-1.13949	-1.31734	-1.22117	-1.25856	-1.26435	-1.35188	-1.22934	-1.3445	-1.33877	-1.34599	-0.950686	-1.20978	-1.34276	-1.30474	-1.12707	-1.11129	-1.34697	-0.846759	-0.15248	-0.845944	-1.18684	-1.30857	-1.21181	-1.28576	-1.19511	-0.615061	0.456414	-1.08995	0.714616	NA	0.0784542	-0.379878	0.925828	NA	0.502718	-1.25137	0.643802	NA	2.57338	-4.15818	0.0106047	0.0178669	0.22897
ENSMUSG00000005469	Prkaca	8.9164	8.49155	8.4183	8.28713	8.49873	8.53766	8.83923	8.95318	8.5497	8.80207	8.57365	8.54014	8.54114	8.78776	8.63106	8.43248	8.56275	8.62283	8.63714	8.24617	8.20674	8.10922	8.00243	8.14969	7.9952	8.62939	8.55164	8.6171	8.60757	8.18738	8.04911	794.158	-0.122748	0.295823	0.53663	670.088	0.0773829	0.493798	0.628896	792.42	0.750542	1.24748e-09	4.8359e-09	645.214	1.00842	7.66664e-17	3.38204e-16	482.302
ENSMUSG00000005470	Asf1b	-0.524838	-0.613004	-0.280518	-0.181413	-0.334557	-0.399479	-0.691113	0.785203	-0.646324	-0.0497638	-0.529415	-0.238237	-0.747823	-0.719182	-0.755589	-0.664772	-0.54752	-0.738909	0.655172	-0.748877	-0.356994	-0.183851	1.66992	1.11296	1.07383	-0.293581	-0.505159	-0.713181	-0.210419	-0.429907	1.28557	0.362199	1.50956	0.626373	NA	1.36243	-1.58912	0.442081	0.582456	0.993248	-0.0566331	0.976605	0.983168	8.24451	-4.02632	3.26044e-05	7.41257e-05	0.718617
ENSMUSG00000005474	Myl10	0	0	0	0	0	0	0	0	0	0	0	0	0	0	0	0	0	0	0	0	0	0	0	0	0	NA	NA	NA	NA	NA	NA	NA	NA	NA	NA	NA	NA	NA	NA	NA	NA	NA	NA	NA	NA	NA	NA	NA
ENSMUSG00000005481	Ddx39	4.55062	4.42679	3.03571	5.31054	3.60244	3.67512	4.13965	4.12348	4.06853	4.23149	4.15416	4.13534	3.91	3.75745	4.01428	3.78792	4.00195	4.4013	4.00184	3.75313	3.65584	3.80477	5.07744	4.53727	4.99537	4.11644	4.0665	3.85322	4.13503	3.73791	4.87003	29.752	0.306703	0.397502	0.635416	29.4398	0.0024063	0.994926	0.997484	34.1531	0.777966	0.022603	0.039191	53.2006	-0.86908	0.00395893	0.00711199	18.3178
ENSMUSG00000005483	Dnajb1	5.224	5.78509	5.00033	5.721	5.39017	6.08669	5.60432	5.62711	5.40721	5.79341	6.65891	6.6611	6.47002	6.42385	6.02443	6.07444	6.34759	6.49365	6.26692	5.78968	5.2028	5.58046	6.93705	6.52911	6.50421	5.56393	6.59668	6.17424	6.36939	5.52432	6.65679	191.733	0.551719	0.00183479	0.0118884	177.402	0.456746	0.0153173	0.0393862	193.515	1.71407	5.65578e-15	3.07211e-14	239.997	0.214983	0.270023	0.331696	100.197
ENSMUSG00000005493	Msh4	-2.07314	-1.97236	-2.03273	-2.01634	-2.04167	-2.05241	-1.99899	-2.08085	-2.09388	-2.0959	-2.15463	-2.15491	-2.14576	-2.12884	-2.15087	-2.102	-2.07689	-2.1402	-2.10996	-2.14644	-2.14176	-2.15376	-2.12743	-2.01549	-2.1273	-2.04583	-2.15177	-2.12724	-2.10902	-2.14732	-2.09007	0	NA	NA	NA	0	NA	NA	NA	0	NA	NA	NA	0.201935	-1.6615	0.683878	NA	0
ENSMUSG00000005501	Usp40	4.65915	5.05969	4.45884	4.87471	4.66504	5.30482	4.2915	4.92288	4.69001	4.77153	2.4504	2.33939	2.51371	3.16832	2.45189	2.49921	2.45899	3.0054	3.54114	4.74157	4.61399	4.87733	4.83076	4.9913	4.89313	4.76982	2.4345	2.70647	3.00184	4.7443	4.90506	5.9791	-0.638312	0.41925	0.65584	6.55213	-1.12847	0.148361	0.256565	39.585	-3.59328	2.55133e-17	1.55441e-16	37.96	-3.74641	7.4295e-19	3.57364e-18	5.30622
ENSMUSG00000005503	Evx1	-2.2076	-2.21423	-2.18922	-2.18177	-2.19328	-2.19817	-2.22634	-2.21111	-2.21703	-2.21795	-2.24684	-2.24697	-2.24062	-2.23293	-2.24295	-2.22072	-2.2093	-2.18563	-2.22434	-2.24093	-2.23881	-2.24458	-2.17983	-2.23384	-2.23223	-2.20567	-2.24481	-2.2322	-2.20643	-2.24144	-2.2153	0	NA	NA	NA	0.152475	-2.24404	0.581531	NA	0	NA	NA	NA	0.216226	-1.6615	0.683878	NA	0.106445
ENSMUSG00000005505	Kbtbd4	6.7739	6.17173	6.44116	5.81434	6.06805	5.87959	6.66164	6.84157	6.43236	6.83481	5.96123	6.15951	5.96622	6.08222	6.25724	6.36296	5.50386	5.39621	5.26858	5.4625	5.2036	5.67964	5.65978	5.45514	5.32556	6.39191	6.02899	6.23414	5.38955	5.44858	5.48016	148.239	-0.286577	0.11488	0.293708	88.264	1.10503	6.94814e-06	3.73969e-05	127.873	1.06084	2.84203e-06	8.42038e-06	110.246	1.09839	8.46102e-07	2.18717e-06	70.2967
ENSMUSG00000005506	Celf1	7.26628	7.65407	7.98557	7.5898	7.17672	7.28195	7.3675	7.02044	7.47447	7.19008	8.5194	8.55264	8.47111	8.52426	8.49786	8.58778	7.86474	8.05262	8.05824	7.76507	7.8549	7.71533	7.9808	7.96568	7.83023	7.40069	8.51438	8.53663	7.99187	7.77843	7.92557	871.7	-0.038386	0.694394	0.850188	602.497	0.841656	1.42045e-10	1.4002e-09	796.525	1.24086	3.19656e-23	2.49491e-22	711.847	1.10029	7.79498e-20	3.89329e-19	423.025
ENSMUSG00000005510	Ndufs3	6.233	6.38673	6.01308	5.70199	6.0901	5.68959	5.95932	6.12527	6.02083	6.05111	7.10194	6.92258	6.94494	6.64952	6.76378	6.91335	7.54215	7.07202	6.73208	6.96794	6.84997	7.30041	6.435	6.51915	6.55993	6.0271	6.98982	6.77555	7.11542	7.03944	6.50469	261.315	0.285788	0.0547237	0.174206	265.146	-0.052895	0.832525	0.889831	352.622	0.162122	0.372423	0.45759	243.737	0.980291	9.922e-10	3.10738e-09	168.283
ENSMUSG00000005514	Por	7.81781	7.24657	7.60551	6.98533	7.58799	7.29074	7.73378	7.61926	7.56536	7.94401	7.31398	7.3039	7.23518	7.71497	7.63858	7.76652	7.35263	7.05669	6.89957	8.19301	8.30245	8.51742	7.31099	7.59177	7.51842	7.53964	7.28435	7.70669	7.10296	8.33762	7.47372	363.921	-0.589467	2.05006e-06	2.78651e-05	230.218	0.422154	0.0261456	0.0619524	618.423	-1.18766	8.74801e-16	4.92373e-15	322.684	0.0420328	0.779358	0.817283	204.908
ENSMUSG00000005533	Igf1r	7.2034	7.05525	7.64696	7.84771	7.76148	7.08501	7.07077	7.01326	7.22265	7.29113	6.81406	6.68116	6.69445	6.55696	6.25346	6.16828	6.87301	7.00558	6.78982	7.19364	7.33793	7.43365	6.83605	7.06226	7.12662	7.31976	6.72989	6.32623	6.88947	7.32174	7.00831	163.957	0.548231	0.00251086	0.0154644	180.713	-0.0781524	0.662439	0.771161	316.668	-0.574298	0.000226592	0.000542572	227.423	-0.0835426	0.617143	0.674846	105.611
ENSMUSG00000005534	Insr	6.85667	6.91289	7.01447	7.30833	7.10239	7.23022	6.48217	6.6378	6.8142	6.52077	6.84835	6.57921	6.55869	6.81192	6.74029	6.97246	6.48326	6.94102	6.86365	7.21667	7.32637	7.24177	6.65732	6.74384	6.61417	6.88799	6.66209	6.84155	6.76264	7.26161	6.67178	212.337	-0.244618	0.141903	0.338938	174.202	-0.0200404	0.928734	0.955682	313.544	-0.572625	0.000599644	0.00135816	197.462	0.310485	0.09046	0.127816	132.216
ENSMUSG00000005540	Fcer2a	-1.5827	-1.61569	-1.49129	-1.45422	-1.51151	-1.5358	-1.41498	-1.60016	-1.62962	-1.63418	-1.73343	-1.73465	-1.72809	-1.70871	-1.72917	-1.648	-1.06929	-1.49503	-0.930873	-1.72824	-1.72719	-1.72988	-1.70552	-1.71324	-1.70522	-1.54701	-1.73206	-1.69529	-1.16506	-1.72844	-1.70799	0	NA	NA	NA	1.84599	-4.93008	0.00909713	0.0250779	0	NA	NA	NA	0	NA	NA	NA	1.29217
ENSMUSG00000005547	Cyp2a5	-2.36118	-2.36282	-2.35662	-2.35477	-2.35763	-2.35884	-2.36582	-2.36204	-2.36351	-2.36374	-2.36096	-2.37128	-2.36936	-2.36745	-2.36993	-2.36443	-2.3616	-2.36873	-2.36532	-2.36944	-2.36891	-2.37034	-2.36729	-2.36768	-2.36728	-2.3607	-2.3672	-2.36727	-2.36522	-2.36956	-2.36742	0.101503	-0.0958564	0.981258	NA	0.0920011	-0.379878	0.925828	NA	0.132477	0.67431	0.868747	NA	0.115615	0.26208	0.948789	NA	0
ENSMUSG00000005553	Atp4a	-1.40813	-1.44002	-1.31976	-1.28392	-1.33931	-1.36279	-1.49826	-1.17273	-1.20121	-1.4579	-1.53763	-1.43529	-1.19323	-1.29353	-1.53412	-1.47126	-1.41634	-1.53217	-1.23638	-1.34873	-1.17375	-1.5347	-1.52687	-1.53012	-1.52658	-1.3484	-1.38871	-1.43297	-1.39496	-1.3524	-1.52785	0.660215	0.617731	0.798803	NA	0.645196	0.287824	0.910513	NA	1.15045	-0.180789	0.924756	0.945514	0.482394	1.99511	0.505772	NA	0.321974
ENSMUSG00000005566	Trim28	6.51232	6.95674	7.5491	6.41937	6.68771	6.54215	6.75934	6.49885	6.52924	6.60723	7.82243	7.80009	7.68034	7.83815	7.81452	7.75764	8.00919	7.82051	7.49193	7.35759	7.45889	7.40689	8.19266	8.22355	8.20605	6.70621	7.76762	7.80344	7.77388	7.40779	8.20742	494.144	-0.060293	0.600254	0.788996	418.952	0.137055	0.464481	0.602636	504.348	0.740578	3.50432e-08	1.23104e-07	602.979	-0.264796	0.0258948	0.0408084	295.896
ENSMUSG00000005575	Ube2m	6.30274	6.71512	7.03986	6.9063	6.75524	7.14463	6.70111	6.15161	6.68872	6.75418	8.01876	8.08871	8.1775	8.0227	7.99797	7.92276	8.22579	8.3615	8.31869	7.82243	7.90967	7.71466	7.65115	7.50025	7.59903	6.71595	8.09499	7.98114	8.30199	7.81559	7.58348	609.816	0.130683	0.235235	0.467887	601.127	-0.123581	0.332519	0.473865	687.656	0.617813	5.69527e-06	1.64066e-05	541.955	0.996045	1.08948e-14	4.38269e-14	397.567
ENSMUSG00000005580	Adcy9	6.9406	7.0327	7.20338	6.86655	6.77311	7.09837	6.18933	6.75599	6.83141	6.78357	7.34249	7.33351	7.13435	8.22982	8.0187	7.99534	6.85779	6.83287	7.0502	6.07569	6.04672	6.05524	6.00051	6.1421	6.40008	6.8475	7.27012	8.08129	6.91362	6.05921	6.1809	534.03	-1.07939	1.06722e-17	5.16348e-16	253.713	0.647579	0.000240937	0.000975213	280.091	1.97263	2.54379e-31	2.70059e-30	247.886	1.83757	2.36259e-22	1.29005e-21	293.011
ENSMUSG00000005583	Mef2c	9.68648	9.69417	7.47138	8.9439	8.78517	8.5305	9.22905	8.85187	8.90766	8.89833	10.3963	10.3808	10.5098	8.44432	8.58521	8.4939	8.20722	8.39133	8.26425	7.8642	7.78725	7.43057	9.72511	9.84731	9.94484	8.89985	10.429	8.50781	8.2876	7.69401	9.83909	2235.54	2.53038	6.11583e-152	4.09822e-148	1934.97	3.00686	1.99061e-126	8.46733e-124	2643.87	3.9746	8.68229e-120	6.687e-118	3186.27	1.06395	4.60802e-22	2.48596e-21	351.226
ENSMUSG00000005609	Ctr9	8.58376	8.06155	8.1777	7.44576	7.72997	7.33211	8.34409	8.37292	7.91583	8.21372	6.98796	7.12524	7.06186	7.30801	7.47889	7.42449	6.49196	6.57842	6.42446	6.27067	6.20883	6.15041	7.42608	7.29887	7.1302	8.01774	7.05835	7.4038	6.49828	6.20997	7.28505	298.014	-0.496392	0.000290016	0.00241867	168.725	0.961906	2.17063e-07	1.45855e-06	218.244	1.50145	3.06247e-18	1.95176e-17	280.871	-0.0116183	0.942298	0.954231	147.402
ENSMUSG00000005610	Eif4g2	8.31273	8.8239	8.65064	9.34415	8.65564	8.8312	8.62286	8.42764	8.70897	8.5064	9.20698	9.34425	9.46756	9.16286	9.18186	9.27038	9.39864	9.46043	9.68767	10.2069	10.213	10.0382	10.2737	10.2516	10.2206	8.68841	9.33959	9.20503	9.51558	10.1527	10.2487	1243.53	0.175686	0.101557	0.270482	1227.18	-0.0869697	0.574046	0.699591	2389.28	-0.83271	1.13824e-09	4.43242e-09	2125.86	-0.891181	1.98755e-14	7.87275e-14	801.569
ENSMUSG00000005611	Mrvi1	0.786771	0.0374061	2.06283	0.475491	0.28622	2.05544	1.0293	0.0625722	2.38596	1.24294	0.263099	-0.222007	-0.141581	-0.0965737	-0.153913	-0.012684	1.17304	1.43007	1.73453	0.223886	0.739029	0.616759	1.23465	0.622725	0.887934	1.04249	-0.0334962	-0.0877235	1.44588	0.526558	0.915102	0.203007	0.719104	0.858727	NA	4.13239	-4.3271	0.00143902	0.00490248	1.53836	-2.14814	0.21211	0.28509	2.35737	-3.08509	0.0429952	0.0650628	2.7559
ENSMUSG00000005615	Pcyt1a	5.40939	5.47634	4.60521	5.41151	4.29268	4.58838	5.10064	5.71664	4.92351	4.88992	4.99356	4.71731	4.96315	4.82896	4.39072	4.95478	5.38502	5.81092	5.66073	6.43571	6.32772	6.56989	5.96724	5.94416	6.07617	5.04142	4.89134	4.72482	5.61889	6.44444	5.99585	48.4047	0.253242	0.4078	0.645182	67.1785	-0.937014	0.000616568	0.00229023	160.797	-1.91937	4.97219e-21	3.56079e-20	98.887	-1.25197	1.15391e-08	3.38881e-08	44.3708
ENSMUSG00000005621	Zfp592	4.88738	5.13932	3.85664	5.45729	4.21909	5.5827	4.86356	3.82805	5.28027	4.62942	4.7405	4.7561	4.72741	4.74097	4.93712	4.68152	5.44382	5.34428	5.56974	5.68946	5.86979	5.80363	6.21771	6.19942	6.27382	4.77437	4.74134	4.78654	5.45261	5.78763	6.23032	48.4485	-0.108368	0.701243	0.853748	60.1514	-0.863243	0.000905065	0.00323679	102.99	-1.23745	7.11872e-09	2.62316e-08	117.107	-1.76532	4.49815e-19	2.18499e-18	42.595
ENSMUSG00000005625	Psmd4	6.51015	6.89777	7.24258	6.36601	5.82212	6.62126	6.31967	6.23079	6.2318	6.30008	7.61324	7.55817	7.70046	7.61986	7.49685	7.52941	8.00697	7.91796	7.84743	7.47607	7.58526	7.51005	7.88484	7.84486	7.89561	6.45422	7.62396	7.5487	7.92412	7.52379	7.8751	426.376	0.0839336	0.48681	0.710545	433.216	-0.23944	0.0767683	0.151267	505.741	0.380791	0.00417367	0.00829149	500.314	-0.0249212	0.837375	0.867168	291.784
ENSMUSG00000005628	Tmod4	-1.56399	-1.60609	-0.78128	-1.40002	-1.47314	-1.50414	-1.68297	-1.58627	-1.62387	-1.62969	-1.7614	-1.76357	-1.75205	-1.72481	-1.4967	-1.64733	-1.57482	-1.4544	-1.6703	-1.47967	-1.24437	-1.75515	-1.72073	-1.73059	-1.39722	-1.48515	-1.75901	-1.62294	-1.56651	-1.49306	-1.61618	0.158755	-1.99693	0.624295	NA	0.152475	-2.24404	0.581531	NA	0.591626	-2.8214	0.306163	NA	0.213715	-1.6615	0.683878	NA	0.20434
ENSMUSG00000005640	Insrr	-2.20569	-2.21391	-2.18292	-2.17368	-2.18795	-2.19401	-2.1639	-2.21004	-2.21738	-2.21852	-2.25455	-2.25475	-2.24662	-2.23709	-2.2495	-2.22196	-2.20781	-2.24349	-2.22644	-2.247	-2.24437	-2.25152	-2.23629	-2.23822	-2.1712	-2.1968	-2.25197	-2.23618	-2.22591	-2.24763	-2.21524	0	NA	NA	NA	0	NA	NA	NA	0	NA	NA	NA	0.213715	-1.6615	0.683878	NA	0
ENSMUSG00000005649	Cabp5	-1.92328	-1.93886	-1.88011	-1.8626	-1.88966	-1.90113	-1.96731	-1.93153	-1.94544	-1.9476	-1.92806	-1.93865	-2.00087	-1.9828	-2.00205	-1.95412	-1.92729	-1.99493	-1.71613	-2.0016	-1.9966	-2.00236	-1.85804	-1.98494	-1.98115	-1.91875	-1.95586	-1.97966	-1.87945	-2.00019	-1.94138	0.188402	0.646029	0.872723	NA	0.687989	-1.53541	0.542511	NA	0.245462	1.41844	0.70616	NA	0.429859	0.0600293	0.982932	NA	0.359308
ENSMUSG00000005656	Snx6	5.53449	5.96965	5.55915	6.82768	5.74479	5.70164	6.0676	6.32574	6.3608	5.97722	6.22762	6.34533	6.37376	6.18431	6.22173	6.40009	6.69803	6.84025	6.95894	7.27615	7.10014	7.26356	8.4443	8.16985	8.21869	6.00688	6.31557	6.26871	6.83241	7.21329	8.27761	145.413	0.0624395	0.726019	0.867181	165.648	-0.578621	0.00152613	0.00517572	286.929	-0.987076	4.17218e-10	1.67256e-09	497.095	-2.30864	4.00546e-52	4.99984e-51	113.148
ENSMUSG00000005667	Mthfd2	3.50691	3.83752	2.07149	2.20948	5.27724	3.22953	3.92323	4.3287	3.81909	4.0036	2.84065	2.49365	2.9951	2.79988	2.98649	2.54595	5.23575	4.32118	4.531	2.31678	2.50433	2.71773	5.51311	5.07169	5.42919	3.62068	2.77646	2.77744	4.69598	2.51295	5.338	9.69915	-0.0473252	0.939362	0.976295	35.4725	-2.79119	1.24629e-09	1.11784e-08	10.1461	0.732547	0.234799	0.310455	65.1869	-3.47878	1.77418e-24	1.04442e-23	24.7066
ENSMUSG00000005672	Kit	7.06043	7.15461	7.88756	7.72647	7.5823	6.8106	7.40117	7.80698	7.46658	7.59946	6.31202	6.08342	6.41981	8.53464	8.6186	8.73987	9.2672	9.35313	9.66274	6.53097	6.44775	5.68123	5.77126	6.09787	5.93252	7.44962	6.27175	8.63104	9.42769	6.21998	5.93388	590.016	-3.27019	2.51874e-126	5.62603e-123	917.92	-4.11179	3.36804e-103	8.92022e-101	134.718	0.243986	0.422644	0.509106	98.54	0.835885	0.000513165	0.00103322	935.379
ENSMUSG00000005674	Tomm40l	5.39016	4.53944	5.53902	4.74612	5.38186	5.43476	5.22326	5.17376	5.20462	4.9556	4.85052	4.70381	5.17608	5.15385	4.62157	4.17935	5.28412	5.15777	4.86199	5.256	5.32609	5.53545	4.46949	4.48289	4.60525	5.15886	4.91014	4.65159	5.10129	5.37251	4.51921	53.9309	0.244583	0.447157	0.678994	55.8473	-0.115469	0.710729	0.806704	89.5824	-0.420791	0.0942778	0.141239	51.2344	0.905472	0.0031372	0.00571862	35.2559
ENSMUSG00000005677	Nr1i3	0	0	0	0	0	0	0	0	0	0	0	0	0	0	0	0	0	0	0	0	0	0	0	0	0	NA	NA	NA	NA	NA	NA	NA	NA	NA	NA	NA	NA	NA	NA	NA	NA	NA	NA	NA	NA	NA	NA	NA
ENSMUSG00000005681	Apoa2	-0.478733	-0.552632	-0.273952	-0.190885	-0.319245	-0.373662	-0.19215	0.383967	-0.5695	-0.0803854	-0.4638	-0.0400956	-0.350085	-0.270128	-0.635195	-0.581233	0.422039	0.96299	0.53085	-0.35304	-0.112054	0.101192	-0.262917	-0.616456	-0.612663	-0.264718	-0.28466	-0.495519	0.638626	-0.121301	-0.497345	0.938484	1.47039	0.469166	NA	4.42024	-2.55788	0.0122423	0.0325219	2.15179	-0.385992	0.764472	0.818511	1.01412	1.84796	0.354728	0.420976	2.78504
ENSMUSG00000005682	Pan2	5.39717	4.67271	6.14471	4.89839	5.08708	4.73482	4.98349	4.68008	4.66638	5.20634	4.11301	3.80306	4.04699	3.94779	4.17813	3.66085	4.32858	4.4611	4.14067	3.811	4.27023	4.17328	4.62503	4.56675	4.75673	5.04712	3.98769	3.92892	4.31012	4.08484	4.6495	25.6725	0.0122127	0.975237	0.991137	26.8614	-0.356814	0.356412	0.498022	33.3064	0.0772113	0.828653	0.871065	38.689	-0.687856	0.0308141	0.0479232	18.1985
ENSMUSG00000005683	Cs	9.32307	8.87512	8.96423	9.05935	9.20273	8.79213	9.44976	9.517	9.26852	9.47135	8.77582	8.75882	8.85971	8.91727	8.99537	8.94121	9.0842	9.25961	8.99923	9.90149	9.92996	10.1176	8.56616	8.63233	8.69875	9.19233	8.79812	8.95129	9.11435	9.98303	8.63241	884.855	-0.231742	0.0182469	0.0769816	817.463	-0.292527	0.032862	0.0754841	1887.67	-1.35383	2.72824e-28	2.6066e-27	776.657	0.543528	1.69123e-06	4.27578e-06	608.47
ENSMUSG00000005686	Ampd3	5.49104	5.66373	5.60313	5.66302	5.63294	6.17477	5.98661	6.38234	5.93704	6.38198	4.12487	3.93774	4.16287	3.6127	3.64349	3.68171	4.46682	4.7465	4.3057	6.07904	5.82001	6.08555	5.64472	5.5015	5.41478	5.89166	4.07516	3.64597	4.50634	5.99487	5.52033	17.7984	0.78037	0.0972424	0.262394	24.9056	-0.574865	0.153522	0.263478	101.368	-2.5802	9.84984e-25	8.17217e-24	58.6671	-1.86391	2.17763e-11	7.48348e-11	14.3181
ENSMUSG00000005687	Bcas2	5.44004	5.49369	4.93341	5.92969	5.22321	6.16078	5.54084	5.95688	6.0233	5.67656	6.66173	6.70917	6.86025	6.86022	6.87941	6.97276	7.78327	7.83747	8.04084	7.43835	7.25991	7.28928	7.46175	7.52264	7.80549	5.63784	6.74372	6.90413	7.88719	7.32918	7.59663	240.849	-0.231527	0.114275	0.293	357.558	-1.37148	9.05954e-18	1.63037e-16	354.543	-0.546475	0.000393378	0.000910299	348.942	-0.84165	2.32888e-07	6.2863e-07	260.14
ENSMUSG00000005696	Sh2d1a	0	0	0	0	0	0	0	0	0	0	0	0	0	0	0	0	0	0	0	0	0	0	0	0	0	NA	NA	NA	NA	NA	NA	NA	NA	NA	NA	NA	NA	NA	NA	NA	NA	NA	NA	NA	NA	NA	NA	NA
ENSMUSG00000005698	Ctcf	5.81486	6.53674	6.12037	5.91991	5.97347	6.55292	5.92482	5.65045	6.10252	5.95133	6.91008	7.00902	7.13416	7.34401	7.13405	7.46386	7.12774	7.29752	7.67892	7.47826	7.41487	7.16056	8.09695	8.09228	8.05954	6.05474	7.01775	7.31397	7.36806	7.35123	8.08292	315.708	-0.411848	0.0050051	0.0274237	276.658	-0.355064	0.0908199	0.173495	379.48	-0.212877	0.208851	0.281387	478.676	-1.10247	1.99809e-17	9.03961e-17	219.591
ENSMUSG00000005699	Pard6a	4.13037	3.39858	2.09318	2.21927	4.12497	3.4481	3.93983	3.50298	2.42035	4.0903	4.12674	3.80306	3.5993	3.70212	3.47918	2.91938	4.72652	4.34484	4.71385	3.2787	3.62401	3.72748	2.92985	3.52025	3.02578	3.33679	3.84303	3.3669	4.59507	3.5434	3.15863	26.4643	0.648724	0.114482	0.293272	42.8296	-0.881841	0.0113287	0.0303648	34.2451	0.726821	0.0492901	0.0793462	25.5748	1.38864	0.00179724	0.00338984	25.8697
ENSMUSG00000005705	Agrp	-2.07653	-2.08616	-2.04984	-2.03901	-2.05574	-2.06284	-2.10375	-2.08163	-2.09023	-2.09156	-2.12952	-2.12963	-2.1245	-1.96093	-2.12787	-2.0956	-2.07901	-2.12083	-2.10085	-2.04875	-2.12186	-2.12917	-2.11239	-2.11465	-2.1123	-2.07373	-2.12788	-2.06147	-2.10023	-2.09993	-2.11311	0.463319	-2.93646	0.345974	NA	0	NA	NA	NA	0.187841	-1.24927	0.759488	NA	0	NA	NA	NA	0.28464
ENSMUSG00000005716	Pvalb	4.71674	4.30348	3.10947	5.69266	5.86061	6.02206	6.24252	5.16123	6.15864	6.60639	3.79146	3.97128	4.00088	3.14711	2.40409	4.84596	10.7171	10.5847	10.5766	5.31692	5.41468	5.01024	5.53845	5.12275	5.36751	5.38738	3.92121	3.46572	10.6261	5.24728	5.3429	17.3977	-0.00827621	0.994845	0.997522	2911.71	-8.5625	0	0	49.7165	-1.79255	1.77635e-08	6.37735e-08	44.7628	-1.86478	7.2389e-09	2.15525e-08	2036.48
ENSMUSG00000005718	Tfap4	0.990426	2.65761	1.22519	1.32212	2.38431	2.24942	1.77994	1.52812	2.23785	2.00032	1.70336	1.93019	1.60401	1.61676	1.68642	2.45195	1.56607	2.67977	1.83113	2.32373	2.22679	2.28199	3.57566	3.66802	3.701	1.83753	1.74586	1.91838	2.02566	2.2775	3.64823	6.33087	-0.362689	0.643001	0.817428	5.8939	-0.690041	0.413694	0.555991	9.22312	-0.730219	0.238524	0.314412	24.4206	-2.80594	4.7233e-10	1.50987e-09	4.74927
ENSMUSG00000005732	Ranbp1	6.61329	6.49306	6.01693	6.28616	5.87365	6.51624	6.09133	6.12327	5.5601	5.52945	7.41698	7.36915	7.43536	7.37395	7.27627	7.37578	7.16249	7.38023	7.63483	7.84632	7.70916	7.64385	7.85956	7.73339	7.75126	6.11035	7.40716	7.342	7.39252	7.73311	7.7814	370.446	0.0761571	0.535224	0.744148	325.6	0.141708	0.42532	0.566703	529.733	-0.190361	0.166842	0.233476	459.042	-0.188077	0.131671	0.177663	219.019
ENSMUSG00000005763	Cd247	0	0	0	0	0	0	0	0	0	0	0	0	0	0	0	0	0	0	0	0	0	0	0	0	0	NA	NA	NA	NA	NA	NA	NA	NA	NA	NA	NA	NA	NA	NA	NA	NA	NA	NA	NA	NA	NA	NA	NA
ENSMUSG00000005774	Rfx5	3.53209	4.5802	2.3773	4.41505	2.89251	3.14588	3.72674	3.04132	4.31312	2.84759	3.70171	3.73259	3.70616	4.24437	4.08397	3.84974	4.66181	4.39222	4.81818	4.95299	4.88067	4.88481	4.8589	5.26477	5.33047	3.48718	3.71349	4.05936	4.62407	4.90616	5.15138	28.2918	-0.581602	0.109183	0.283854	34.403	-1.19735	0.000590233	0.00220056	57.0551	-1.49891	4.39749e-08	1.53162e-07	57.828	-1.79613	6.08236e-10	1.93332e-09	27.2314
ENSMUSG00000005779	Psmb4	9.07024	8.30519	7.9011	7.16158	8.34261	8.28872	8.95845	8.82411	8.60738	8.88995	8.43308	8.35384	8.33569	8.40253	8.40964	8.32819	8.45472	8.16847	7.80708	8.06715	8.12534	8.33551	8.32408	8.30068	8.32881	8.43493	8.3742	8.38012	8.14342	8.176	8.31785	675.479	-0.0250717	0.810049	0.913966	526.898	0.446737	0.0325827	0.0749654	742.546	0.51409	0.000214362	0.000514948	668.268	0.391329	0.000579483	0.00116022	366.83
ENSMUSG00000005800	Mmp8	-2.19952	-2.13063	-2.1719	-2.16069	-2.17801	-2.18535	-2.22769	-2.2048	-2.2137	-2.21508	-2.25773	-2.25787	-2.24917	-2.2376	-2.25266	-2.21925	-2.20209	-2.24537	-2.22469	-2.24963	-2.16758	-2.25511	-2.23664	-2.23897	-2.23655	-2.18874	-2.25492	-2.2365	-2.22405	-2.2241	-2.23738	0	NA	NA	NA	0	NA	NA	NA	0.201892	-1.24927	0.759488	NA	0	NA	NA	NA	0
ENSMUSG00000005802	Slc30a4	5.29823	5.88338	4.04883	4.94303	5.33492	5.2317	5.55555	5.69429	5.67976	5.48836	6.0538	6.03692	5.9586	5.90842	5.61659	6.00251	5.67011	5.72569	6.26515	5.66578	5.69786	5.59104	5.12369	5.28817	5.29256	5.3158	6.01644	5.84251	5.88698	5.65156	5.23481	136.818	0.240928	0.204332	0.427821	120.551	0.283429	0.258042	0.391836	152.349	0.759337	3.34361e-05	8.87427e-05	114.064	1.418	1.05069e-11	3.66671e-11	77.0344
ENSMUSG00000005803	Sqor	4.65482	4.0305	4.10183	3.88526	4.65922	4.56706	4.57503	4.79085	4.55069	4.41283	1.4697	1.70413	1.15022	1.28335	1.11194	1.51178	2.67121	1.19292	2.23278	5.43932	5.5847	5.73573	7.45772	7.62271	7.78106	4.42281	1.44135	1.30236	2.0323	5.58658	7.6205	0.550601	2.11049	0.422764	NA	1.93257	-1.25962	0.441216	0.581535	78.5889	-6.51194	1.13023e-24	9.34871e-24	367.066	-8.9422	1.49224e-48	1.6985e-47	1.00607
ENSMUSG00000005804	Bloc1s6	3.35101	4.83921	3.91125	2.8048	4.19733	3.6323	3.90437	3.88455	3.90027	3.40149	5.1044	5.15097	5.41903	4.86612	4.76613	4.83352	4.87972	4.93642	5.26748	5.46562	5.62654	5.40126	5.01607	5.44309	4.91506	3.78266	5.2248	4.82193	5.02787	5.49781	5.12474	75.9114	0.55248	0.0223981	0.0902524	71.3936	0.403163	0.140763	0.246186	123.023	-0.130597	0.539165	0.619353	89.1552	0.412973	0.108946	0.150387	40.2635
ENSMUSG00000005813	Metap1	5.6342	6.09514	6.34126	6.76502	5.77447	4.96785	5.16298	4.94518	5.36357	4.94566	6.5146	6.49815	6.51477	6.49902	6.53166	6.55111	6.26782	6.49921	6.27871	6.03574	5.96363	5.886	6.69315	6.3877	6.61796	5.59953	6.50917	6.52726	6.34858	5.96179	6.56627	207.403	-0.0385984	0.795128	0.906244	163.959	0.346716	0.0573937	0.11969	199.86	1.00375	2.91297e-09	1.10304e-08	214.677	0.224795	0.177246	0.2303	114.89
ENSMUSG00000005823	Gpr108	4.7861	4.90423	4.38933	5.27114	4.04381	5.33929	4.68366	5.6958	4.80133	5.10855	4.73509	4.66646	4.69458	4.59061	4.30096	4.18017	5.54878	5.55208	5.75949	5.91915	6.09323	6.41634	6.60651	6.71741	6.70354	4.90232	4.69871	4.35725	5.62012	6.14291	6.67582	37.0386	0.48828	0.137675	0.331677	63.9312	-1.17516	4.32026e-06	2.39792e-05	127.353	-1.80965	8.31997e-15	4.48049e-14	156.184	-2.42133	5.63239e-38	4.94576e-37	40.3995
ENSMUSG00000005824	Tnfsf14	-1.80813	-1.82489	-1.76169	-1.74286	-1.77196	-1.7843	-1.8555	-1.817	-1.83197	-1.83429	-1.89003	-1.89034	-1.88867	-1.87215	-1.88895	-1.84131	-1.81244	-1.88521	-1.85045	-1.88871	-1.887	-1.88914	-1.73795	-1.6093	-1.60522	-1.80326	-1.88968	-1.86747	-1.84937	-1.88828	-1.65083	0	NA	NA	NA	0	NA	NA	NA	0	NA	NA	NA	1.04752	-3.87395	0.0599154	0.0880536	0
ENSMUSG00000005836	Gata6	0	0	0	0	0	0	0	0	0	0	0	0	0	0	0	0	0	0	0	0	0	0	0	0	0	NA	NA	NA	NA	NA	NA	NA	NA	NA	NA	NA	NA	NA	NA	NA	NA	NA	NA	NA	NA	NA	NA	NA
ENSMUSG00000005846	Rsl1d1	6.40005	6.71004	7.28294	5.89603	5.92039	6.03994	6.77109	6.7357	6.52575	6.42566	7.39789	7.56677	7.66148	7.53062	7.69377	7.78369	6.75433	7.44098	7.7547	7.6099	7.36665	7.29205	7.59234	7.50754	7.4814	6.47076	7.54205	7.66936	7.31667	7.42287	7.52709	448.527	-0.182924	0.168919	0.378508	336.328	0.35464	0.202117	0.325844	480.768	0.40052	0.0174048	0.0308328	425.318	0.332495	0.0197848	0.0318193	249.525
ENSMUSG00000005864	Cnga2	-2.186	-2.20654	-1.96655	-2.10598	-2.14166	-2.15679	-2.24406	-2.19687	-2.21522	-2.21806	-2.30933	-2.30994	-2.28832	-2.26448	-2.29551	-2.22667	-2.19128	-2.28048	-2.23788	-2.28927	-2.28268	-2.30056	-2.09997	-2.2673	-2.2623	-2.16377	-2.30253	-2.26222	-2.23655	-2.29084	-2.20986	0	NA	NA	NA	0	NA	NA	NA	0	NA	NA	NA	0.216226	-1.6615	0.683878	NA	0
ENSMUSG00000005871	Apc	9.55626	9.14131	9.37042	8.55203	8.99964	9.10231	9.77615	9.39024	9.30074	9.25915	8.91758	8.93838	8.99025	8.70829	8.82851	8.70134	8.28935	8.52943	8.53631	9.23011	9.14993	9.01944	8.55981	8.80785	8.69498	9.24483	8.94873	8.74605	8.4517	9.13316	8.68755	900.848	0.257176	0.0102895	0.0492497	691.321	0.830075	1.12685e-09	1.0146e-08	1284.98	-0.00841038	0.947058	0.961756	905.506	0.666124	5.61113e-08	1.57947e-07	425.286
ENSMUSG00000005873	Reep5	7.69178	7.98974	7.83495	7.82669	7.88987	8.17692	7.89115	7.67464	7.83027	7.74075	8.63636	8.6838	8.75267	8.54091	8.66311	8.4298	8.4799	8.70402	8.89967	9.81428	9.89562	9.77958	9.30518	9.22865	9.28375	7.85468	8.69094	8.54461	8.69453	9.82983	9.27253	808.081	0.169764	0.121716	0.305704	740.768	0.128158	0.426343	0.567743	1888.34	-1.24879	3.54483e-28	3.36903e-27	1154.27	-0.464375	7.71878e-06	1.8498e-05	480.114
ENSMUSG00000005881	Ergic3	7.11229	7.38675	7.13698	6.2707	7.32837	7.18045	7.11914	7.44376	7.14264	7.20462	7.22171	7.2902	7.10195	7.15571	7.21202	7.09741	7.5443	7.42009	7.76301	8.27089	8.47669	8.41834	9.00142	9.08754	9.16283	7.13257	7.20462	7.15505	7.5758	8.38864	9.08393	261.678	0.0578408	0.687265	0.846214	276.452	-0.360632	0.0473109	0.101763	620.303	-1.35271	1.03574e-21	7.62468e-21	839.587	-2.1819	1.20976e-67	2.15582e-66	187.92
ENSMUSG00000005882	Uqcc1	6.9416	5.84807	6.05659	5.75985	6.35053	6.26352	6.42756	6.64683	6.64163	6.56873	5.86762	5.54497	5.47147	6.03117	5.63704	5.52394	6.2988	6.46581	6.36996	6.09276	6.12903	6.29975	5.55015	5.85602	5.95485	6.35049	5.62802	5.73072	6.37819	6.17384	5.78701	92.5893	-0.176476	0.46639	0.6945	112.089	-0.890491	0.000146492	0.000624829	137.8	-0.509157	0.0186562	0.0328678	95.6566	0.0914609	0.716278	0.762982	81.1181
ENSMUSG00000005883	Spo11	0	0	0	0	0	0	0	0	0	0	0	0	0	0	0	0	0	0	0	0	0	0	0	0	0	NA	NA	NA	NA	NA	NA	NA	NA	NA	NA	NA	NA	NA	NA	NA	NA	NA	NA	NA	NA	NA	NA	NA
ENSMUSG00000005886	Ncoa2	7.67476	7.53752	7.41931	7.69025	7.40857	7.33058	7.28273	7.31959	7.45804	7.20791	7.71286	7.6987	7.75775	7.5443	7.47023	7.5199	7.76584	7.93023	7.88416	7.51545	7.46892	7.4925	7.66306	7.735	7.80912	7.43293	7.7231	7.51148	7.86008	7.49229	7.73573	401.481	0.277851	0.0197963	0.0822412	402.094	-0.046054	0.729906	0.82018	480.371	0.564177	1.07173e-05	2.9908e-05	451.694	0.291087	0.018924	0.0305534	254.144
ENSMUSG00000005891	Prl4a1	0	0	0	0	0	0	0	0	0	0	0	0	0	0	0	0	0	0	0	0	0	0	0	0	0	NA	NA	NA	NA	NA	NA	NA	NA	NA	NA	NA	NA	NA	NA	NA	NA	NA	NA	NA	NA	NA	NA	NA
ENSMUSG00000005892	Trh	0.593226	0.513722	0.828044	2.83158	2.10837	0.709552	1.87957	0.550824	1.75178	1.44243	1.23187	1.93582	1.72029	0.30985	1.257	0.438921	1.97459	2.09147	2.09246	3.79698	3.75893	2.39795	1.09829	1.06336	1.09965	1.32091	1.62932	0.668591	2.05284	3.31795	1.0871	4.00401	2.07166	0.0745014	0.219927	7.49527	-0.557945	0.435694	0.576748	30.798	-2.5776	3.36065e-06	9.89232e-06	5.06708	1.59325	0.0857152	0.121844	3.5041
ENSMUSG00000005893	Nr2c2	6.01441	6.68358	6.45019	6.99183	6.4281	6.89637	6.97371	5.98674	6.84676	6.41669	7.21415	7.20252	7.26446	7.14341	7.15717	7.13915	7.31901	6.88256	7.22818	7.27441	7.2256	7.12349	6.72426	6.7917	6.9416	6.56884	7.22704	7.14658	7.14325	7.20783	6.81919	316.293	0.0914453	0.474455	0.701833	271.698	0.273402	0.145442	0.252802	389.368	0.270754	0.0541654	0.0864952	285.919	0.865838	4.29054e-09	1.29456e-08	181.169
ENSMUSG00000005897	Nr2c1	3.38512	4.71559	5.28661	4.62268	5.52457	3.05155	3.93114	3.64287	4.61142	4.62724	4.50935	4.4682	4.55238	4.74727	4.44426	4.57171	4.60131	5.10005	5.61766	4.60535	4.87781	4.64096	5.63424	5.23707	5.65973	4.33988	4.50998	4.58775	5.10634	4.70804	5.51034	45.5277	-0.133474	0.647886	0.820848	53.8625	-0.839668	0.0161128	0.0411227	57.5473	-0.0521157	0.845933	0.884899	78.018	-1.12875	6.41334e-06	1.54763e-05	38.6195
ENSMUSG00000005899	Smpd4	5.66057	5.33563	5.90879	6.08695	5.36746	5.7996	5.43358	5.25901	5.48059	5.1599	5.42361	5.37531	5.53145	4.77441	5.02293	4.57316	5.23738	4.74989	4.73344	5.74718	5.91845	6.12093	5.4744	5.58938	5.73118	5.54921	5.44346	4.79016	4.9069	5.92886	5.59832	66.9384	0.879119	0.00074825	0.00551295	60.8065	0.979434	0.000862972	0.00310047	134.883	-0.449128	0.0289721	0.0490977	96.3722	0.0816054	0.701931	0.75012	28.9776
ENSMUSG00000005907	Pex1	5.90054	5.4197	4.42592	5.55017	5.6856	5.49131	5.66657	5.70774	5.63291	5.50595	4.77556	4.94901	4.73324	4.8027	4.8587	5.07586	3.90753	4.0924	3.65627	3.87342	3.98734	4.10696	4.51375	4.79276	3.97251	5.49864	4.81927	4.91242	3.8854	3.98924	4.42634	59.4654	-0.122593	0.639616	0.815092	33.774	1.57449	5.37978e-05	0.000249805	49.4965	1.52284	6.54141e-07	2.06393e-06	49.8091	0.827618	0.0127364	0.021182	25.144
ENSMUSG00000005917	Otx1	0.249441	1.51976	0.507037	0.638455	0.435379	1.64275	1.19567	0.884532	0.158615	0.749244	2.09685	1.38324	1.62454	0.0221378	0.32285	0.124749	0.232629	1.24547	0.0927608	2.88666	2.90919	2.7777	0.490179	0.77295	0.491187	0.798087	1.70155	0.156579	0.523619	2.85785	0.584772	5.46498	4.37855	0.00133529	0.00912574	5.56019	2.23787	0.0418245	0.0920409	26.4647	-1.49324	0.000418274	0.000965176	6.84373	2.8416	0.00332841	0.00604061	0.63012
ENSMUSG00000005936	Kctd20	6.43491	5.62264	5.40074	6.40833	5.85202	5.48613	6.43359	6.56148	6.29291	6.19097	6.16062	6.38653	6.52946	5.95811	6.03563	6.08227	5.5898	6.07091	5.76315	6.00322	5.90399	6.03764	6.78542	6.6188	6.54213	6.06837	6.35887	6.02534	5.80795	5.98162	6.64878	152.343	0.459451	0.0141031	0.0632351	121.79	0.876213	0.000518692	0.00195407	181.778	0.778245	6.35693e-05	0.00016333	205.096	-0.0848961	0.649662	0.703527	68.8979
ENSMUSG00000005947	Itgae	-0.426315	-0.517004	-0.175003	-0.0730612	-0.230588	-0.297369	-0.580884	-0.474305	-0.53392	-0.538805	-0.426913	-0.692507	-0.640276	-0.610289	-0.648405	-0.553272	0.204823	0.412573	0.293823	0.614695	0.669975	-0.324111	1.49148	1.44075	1.56046	-0.384725	-0.586565	-0.603988	0.30374	0.320186	1.49756	0.101503	-0.0958564	0.981258	NA	1.67804	-3.85658	0.0296826	0.0691657	2.63084	-3.94277	0.0157894	0.0281974	8.5437	-5.91826	6.29251e-06	1.51964e-05	1.10847
ENSMUSG00000005949	Ctns	2.87885	3.61614	3.42783	2.52015	3.30311	4.81064	3.31902	3.04188	4.0131	3.71122	3.69721	4.0179	3.31801	3.6476	4.03274	3.70894	2.83004	3.68208	3.66788	5.76896	6.0186	6.01549	6.66839	6.7342	6.59546	3.46419	3.6777	3.79643	3.39333	5.93435	6.66602	23.5817	-0.148018	0.726303	0.867318	16.7573	0.522366	0.342466	0.483962	117.131	-2.76202	5.75643e-26	5.01553e-25	174.077	-3.61173	4.29194e-54	5.63895e-53	12.3004
ENSMUSG00000005950	P2rx5	-0.0359227	-0.0892095	0.243643	0.364505	2.12865	1.36285	1.31221	0.612992	1.58699	1.15101	-0.331775	0.0923997	0.116894	0.775584	0.0849393	-0.138716	1.8264	1.68333	2.14201	-0.268748	-0.257008	0.517107	-0.218063	0.21657	-0.217683	0.863772	-0.040827	0.240603	1.88391	-0.00288285	-0.0730585	1.19836	-1.40055	0.444538	NA	7.53885	-4.58033	1.79395e-05	9.0031e-05	0.928775	-0.182646	0.933318	0.951738	0.590159	0.756448	0.765761	NA	5.57495
ENSMUSG00000005951	Shpk	3.03818	1.41073	1.15844	1.25028	3.07803	1.73753	1.90574	1.83765	2.15874	1.92908	1.79743	1.75173	1.68908	1.73754	2.11122	1.85788	2.38109	1.25501	1.53264	2.37927	2.98431	2.58296	1.90228	1.71505	2.34663	1.95044	1.74608	1.90221	1.72291	2.64885	1.98799	6.44779	-0.383035	0.605261	0.792391	5.20987	0.187898	0.837441	0.893192	14.0088	-1.46937	0.00719523	0.0137151	7.00759	-0.241705	0.733652	0.778572	4.10086
ENSMUSG00000005952	Trpv1	-1.81172	-1.89891	-1.57008	0.472786	-1.62352	-0.997903	-2.05816	-1.85786	-1.93574	-1.9478	-2.2988	-2.31396	-2.23568	-2.14483	-2.24867	-1.98434	-1.83415	-1.59015	-2.03191	-2.2374	-2.2221	-2.2578	-2.13639	-2.15681	-2.1356	-1.52289	-2.28281	-2.12594	-1.81874	-2.2391	-2.14293	0	NA	NA	NA	0.152475	-2.24404	0.581531	NA	0	NA	NA	NA	0	NA	NA	NA	0.106445
ENSMUSG00000005958	Ephb3	5.91986	5.25052	4.75364	3.57384	5.12664	4.76634	4.99562	4.54453	4.9582	5.45305	5.37853	5.23074	5.11887	5.47805	5.36646	5.12616	3.62313	3.68943	3.1932	5.78059	5.99427	6.00106	4.27614	4.57168	4.53659	4.93422	5.24272	5.32356	3.50192	5.92531	4.46147	87.9962	-0.145037	0.515884	0.73124	42.9176	2.88569	8.01967e-12	9.02021e-11	142.379	-0.673374	0.000666108	0.00150162	64.875	1.4505	1.44467e-07	3.95445e-07	31.8931
ENSMUSG00000005968	Tuft1	2.07686	1.53668	2.10397	1.42131	3.27342	2.65228	1.295	2.68169	3.20161	1.45964	1.84989	1.48066	1.50151	2.65722	2.0852	2.00001	3.56499	3.96048	3.4686	1.04471	1.86203	1.41328	2.95819	2.77479	2.96028	2.17025	1.61069	2.24748	3.66469	1.44001	2.89775	6.87424	-1.33668	0.0751845	0.221324	20.1093	-3.38747	5.3273e-10	4.93919e-09	4.21615	0.628257	0.510909	0.592775	11.2795	-2.02018	0.000813252	0.00160099	15.8647
ENSMUSG00000005973	Rcn1	4.07877	4.76367	4.41492	5.91736	4.70134	4.52536	4.725	4.77144	4.43377	4.03529	4.68496	4.60737	4.87266	5.03911	4.57691	3.65033	3.89377	3.65274	4.34122	6.2996	6.4528	6.1014	5.50631	5.31529	5.06638	4.63669	4.72166	4.42212	3.96257	6.2846	5.29599	47.6396	0.17742	0.608652	0.794579	32.8314	1.30531	0.00134817	0.00462582	158.469	-1.90843	3.11136e-19	2.05927e-18	70.8359	-0.529961	0.0412227	0.0626031	20.1265
ENSMUSG00000005980	Dnase1	0	0	0	0	0	0	0	0	0	0	0	0	0	0	0	0	0	0	0	0	0	0	0	0	0	NA	NA	NA	NA	NA	NA	NA	NA	NA	NA	NA	NA	NA	NA	NA	NA	NA	NA	NA	NA	NA	NA	NA
ENSMUSG00000005981	Trap1	8.46367	7.6346	7.76684	8.17982	7.86566	7.76204	8.27847	8.42546	8.02786	8.22725	7.34274	7.31567	7.39834	7.45543	7.46438	7.57159	7.58358	7.66328	7.23068	7.7477	7.64125	8.04866	7.6317	7.42967	7.59182	8.06317	7.35225	7.49713	7.49251	7.81254	7.55106	315.232	-0.224662	0.0837045	0.238479	268.433	-0.0698186	0.716784	0.810858	443.185	-0.429435	0.0107146	0.019737	326.326	0.0148312	0.917583	0.934371	201.029
ENSMUSG00000005982	Naa60	4.62556	4.73366	5.09776	6.25444	5.22594	5.04494	5.26529	4.84612	4.84202	4.94199	5.41415	5.37252	5.2674	4.94683	4.99269	4.91986	5.22151	5.76607	5.51246	5.25556	5.52177	5.36199	5.4153	5.28973	5.41764	5.08777	5.35136	4.95312	5.50001	5.37977	5.37422	71.255	0.563164	0.0193756	0.0808947	79.0435	-0.122584	0.636216	0.750638	103.581	0.210896	0.326321	0.410207	87.7186	0.286505	0.19027	0.244899	46.105
ENSMUSG00000005983	1700037C18Rik	0.935971	1.76449	1.15224	1.24767	1.1032	1.0449	1.48518	1.84094	0.834588	0.825242	2.6153	2.89781	2.86226	1.73828	1.95095	2.23268	2.39315	2.41378	2.93844	2.62082	2.79102	2.33875	2.67024	2.3086	2.80024	1.22344	2.79179	1.97397	2.58179	2.58353	2.59303	14.555	1.43091	0.00988427	0.0476796	16.5223	0.429573	0.393435	0.536176	22.9666	0.57276	0.172089	0.239199	19.7102	0.601862	0.178251	0.231454	7.40366
ENSMUSG00000005986	Ankrd13d	6.24488	5.68388	5.31217	6.37652	5.91006	5.62215	5.95484	5.75552	5.6929	5.97107	5.62953	5.37258	5.35042	5.34344	4.94616	5.23994	5.19415	5.22541	4.98013	4.52421	4.72479	4.10413	4.07748	4.35213	4.48564	5.8524	5.45084	5.17652	5.13323	4.45104	4.30508	82.0872	0.394234	0.102326	0.271558	69.1123	0.616214	0.0228961	0.0555082	78.9485	1.71235	3.07574e-09	1.16359e-08	65.1524	2.03257	1.15588e-11	4.02757e-11	41.1995
ENSMUSG00000005994	Tyrp1	-1.49572	-1.52846	-1.405	-1.36819	-1.42506	-1.44917	-1.32924	-1.51305	-1.54229	-1.54682	-1.50694	-1.6382	-1.63212	-1.6208	-1.2927	-1.56054	-1.50415	-1.63094	-1.5784	-1.63225	-0.473795	-1.63378	-1.61763	-1.6253	-1.61733	-1.4603	-1.59242	-1.49135	-1.57116	-1.24661	-1.62009	0.419013	-1.64202	0.587743	NA	0.0920011	-0.379878	0.925828	NA	2.1514	-3.64805	0.353393	0.438831	0.115615	0.26208	0.948789	NA	0.19579
ENSMUSG00000006005	Tpr	7.88602	8.24185	8.60352	8.16148	7.98416	7.86864	7.77846	7.82446	7.94913	7.73208	8.53092	8.66086	8.59885	8.70171	8.82296	9.03921	8.47763	8.84374	9.16115	8.88011	8.81471	8.51087	9.6447	9.5639	9.61521	8.00298	8.59688	8.85462	8.82751	8.73523	9.60794	899.831	-0.365636	0.00204047	0.0129665	760.706	-0.204554	0.334388	0.475804	1006.33	0.0460734	0.77057	0.823637	1347.45	-1.02798	1.74288e-22	9.55641e-22	597.14
ENSMUSG00000006007	Pdc	0	0	0	0	0	0	0	0	0	0	0	0	0	0	0	0	0	0	0	0	0	0	0	0	0	NA	NA	NA	NA	NA	NA	NA	NA	NA	NA	NA	NA	NA	NA	NA	NA	NA	NA	NA	NA	NA	NA	NA
ENSMUSG00000006010	Odr4	6.89507	6.06001	6.52215	6.1553	6.36489	6.42587	6.94465	6.67888	6.39873	6.59221	5.92285	5.96734	6.13278	6.21576	6.33127	6.33184	6.48778	6.80358	7.0735	6.93861	6.95484	7.06111	6.81533	6.7773	6.92948	6.50378	6.00766	6.29295	6.78829	6.98485	6.8407	128.817	-0.431056	0.020312	0.083873	147.42	-0.996647	1.76299e-05	8.87312e-05	227.421	-1.12874	1.46709e-11	6.47773e-11	175.148	-0.869149	4.84955e-07	1.27559e-06	113.707
ENSMUSG00000006014	Prg4	3.93782	2.91776	1.10154	4.25464	3.19585	3.93177	2.95504	2.899	3.03515	1.94415	1.16583	0.919229	1.32935	0.503349	0.394991	0.655285	0.811943	2.3047	1.76147	1.9165	2.19042	1.55918	1.54428	1.70033	1.74609	3.01727	1.13814	0.517875	1.62604	1.8887	1.66357	1.17919	3.14479	0.0987614	NA	3.36638	-1.31514	0.237087	0.368367	5.46935	-1.39245	0.100037	0.148857	3.64435	-0.839548	0.382282	0.449242	1.60341
ENSMUSG00000006019	Dhx34	3.13244	3.60835	2.06416	4.19829	3.79422	3.79371	4.10776	3.35457	3.29115	3.37611	3.28306	3.28043	3.37322	3.36332	3.03106	2.54224	2.86448	2.40355	3.16486	3.81761	3.65132	3.93035	4.7629	4.8394	4.9677	3.47208	3.31224	2.97887	2.81096	3.79976	4.85667	15.7182	0.416804	0.404689	0.642672	12.4696	1.03564	0.0838868	0.162398	28.9857	-0.530817	0.139988	0.199959	50.534	-1.96808	1.67584e-11	5.79319e-11	6.98952
ENSMUSG00000006021	Kptn	4.82947	3.77355	5.14824	2.62595	4.72506	4.06643	4.63965	4.24807	3.87355	4.67033	4.50443	4.39266	4.439	4.42202	4.4944	4.47947	3.69326	3.67526	3.44359	4.6801	4.74425	4.7866	3.82242	4.12195	3.92489	4.26003	4.44536	4.4653	3.60404	4.73698	3.95642	47.3248	-0.045882	0.871411	0.947099	28.6165	1.47552	0.000234385	0.000950337	64.6055	-0.174573	0.483244	0.566677	39.1296	1.04008	0.00132002	0.00253156	20.118
ENSMUSG00000006024	Napa	7.95089	8.04096	8.04683	7.73658	7.97599	7.64221	7.83365	7.74818	7.76067	7.82361	8.98511	8.93558	8.97912	8.99159	8.83196	8.88155	9.1413	8.84072	8.83126	8.1435	8.00135	8.11261	8.44255	8.30225	8.4841	7.85596	8.9666	8.9017	8.93776	8.08582	8.40963	1135.85	0.0695268	0.466748	0.6945	988.258	0.192486	0.181173	0.299332	1037.52	1.43809	2.57237e-33	2.92898e-32	974.044	1.05515	3.31585e-20	1.68065e-19	665.789
ENSMUSG00000006050	Sra1	6.72018	6.01486	5.33987	5.89735	6.14536	5.59058	6.30821	6.06204	6.31117	6.29108	6.27468	6.42903	6.20551	6.44957	6.28138	6.11757	6.89608	6.40269	6.46454	5.93438	6.10424	5.89062	6.68869	6.67643	6.67807	6.06807	6.30307	6.28284	6.58777	5.97641	6.68106	160.665	0.00321988	0.985622	0.99431	160.009	-0.223106	0.32357	0.46484	169.245	0.718543	0.000158296	0.000386924	195.912	-0.194311	0.241578	0.301432	110.439
ENSMUSG00000006056	Calcoco2	-2.33636	-2.33873	-2.32979	-2.32713	-2.33125	-2.33299	-2.34306	-2.33762	-2.33974	-2.34006	-2.35096	-2.35098	-2.34817	-2.34542	-2.349	-2.34106	-2.33697	-2.34727	-2.34235	-2.34828	-2.34752	-2.33083	-2.34519	-2.34575	-2.34517	-2.33567	-2.35004	-2.34516	-2.3422	-2.34221	-2.34537	0	NA	NA	NA	0	NA	NA	NA	0.159962	-1.24927	0.759488	NA	0	NA	NA	NA	0
ENSMUSG00000006057	Atp5g1	2.32785	1.87003	1.28039	3.11511	2.75377	1.85441	2.83063	1.00389	2.27546	0.926153	1.8213	2.12346	2.36876	1.83698	2.22155	2.48803	2.50518	3.21989	4.02672	2.43084	2.42545	2.50227	1.67261	1.63548	1.67405	2.02377	2.10451	2.18219	3.2506	2.45285	1.66071	8.9143	-0.164626	0.802431	0.909802	18.6328	-2.03588	0.000805462	0.00292152	12.3265	-0.371308	0.497952	0.580879	6.61852	1.2938	0.0983011	0.137452	13.271
ENSMUSG00000006058	Snf8	4.92929	4.41329	5.80991	5.14795	5.15818	4.979	4.61294	4.14103	4.65036	4.99945	5.2091	5.21715	5.53225	5.45321	5.66111	5.42634	5.40533	5.39431	5.46766	5.21728	5.41836	5.51604	6.09047	5.92466	6.10184	4.88414	5.3195	5.51355	5.42244	5.38389	6.03899	90.6238	-0.314748	0.161633	0.368654	73.2909	0.0114116	0.964553	0.97784	100.952	0.145422	0.531596	0.612339	120.038	-0.691483	0.000938784	0.00183346	56.0778
ENSMUSG00000006095	Tbcb	6.17236	6.038	6.46588	6.96418	5.88711	6.72436	6.46665	6.86438	6.14381	6.33669	6.90013	6.97993	6.95963	6.97241	6.88313	6.62694	7.00398	7.14228	7.05574	7.06562	7.12895	7.16501	7.46006	7.23425	7.22558	6.40634	6.94656	6.82749	7.06733	7.11986	7.30663	245.356	0.120401	0.424653	0.660485	232.996	-0.0205829	0.894348	0.931787	333.712	0.0109872	0.937786	0.954574	310.4	-0.183369	0.222761	0.28125	153.732
ENSMUSG00000006127	Inpp5k	7.14412	6.64404	6.66015	5.12127	6.26552	5.89515	6.70992	6.89043	6.90072	6.74646	6.1551	6.10041	6.10849	6.29851	6.25075	6.20823	6.81242	6.45358	6.03751	6.47474	6.42567	6.7122	7.09494	7.01192	7.35847	6.49778	6.12133	6.2525	6.4345	6.53754	7.15511	134.427	-0.204767	0.248149	0.482772	128.372	-0.319116	0.222014	0.350119	185.224	-0.350822	0.0517745	0.0829693	225.106	-1.12509	9.32737e-11	3.0927e-10	94.6976
ENSMUSG00000006134	Crkl	5.19927	5.55674	6.11002	4.88842	5.18289	5.6034	5.36018	4.88926	5.23792	4.78131	5.64098	5.76162	5.49097	5.62976	5.75925	5.93513	6.73196	7.09067	6.59318	6.63241	6.59261	6.81173	6.94909	6.92718	6.66425	5.28094	5.63119	5.77471	6.80527	6.67892	6.84684	99.3059	-0.193505	0.36504	0.6059	156.444	-1.47812	2.50643e-10	2.41308e-09	196.422	-1.18208	1.37585e-10	5.69451e-10	184.736	-1.34489	1.60412e-12	5.83057e-12	113.399
ENSMUSG00000006143	Upk3bl	-1.55042	-1.57514	-1.48191	-1.45412	-1.49706	-1.51526	-1.62029	-1.5635	-1.58558	-1.589	-1.657	-1.6576	-1.65431	-1.64486	-1.65486	-1.59936	-1.55678	-1.65367	-1.61285	-1.07389	-1.3529	-1.21046	-1.64247	-1.64826	-1.64224	-1.54323	-1.65631	-1.63303	-1.60776	-1.21242	-1.64432	0	NA	NA	NA	0	NA	NA	NA	1.98284	-4.59036	0.00700563	0.0133756	0	NA	NA	NA	0
ENSMUSG00000006154	Eps8l1	2.3871	1.95631	3.39227	1.12774	1.75148	0.891099	1.82852	1.35112	3.1668	2.07148	1.24903	0.539108	1.59486	1.94661	1.87449	0.617285	0.751522	1.79624	0.577557	0.417767	1.99826	2.98158	3.12786	3.37766	3.03702	1.99239	1.12767	1.47946	1.04177	1.7992	3.18085	4.10855	-1.05992	0.309876	0.551889	2.22324	0.225105	0.88666	0.926459	8.30397	-1.84988	0.0812712	0.123729	16.7263	-3.3763	9.89667e-08	2.74234e-07	2.27575
ENSMUSG00000006169	Clint1	5.48186	6.20451	6.10286	6.04277	6.15781	5.28769	5.76508	4.77793	5.98931	5.61571	6.67267	6.58784	6.8114	6.67207	6.82671	6.77813	6.85719	6.70391	6.40894	6.27171	6.25856	6.31623	8.25614	8.11178	8.21353	5.74256	6.69064	6.75897	6.65668	6.28216	8.19382	229.365	-0.115641	0.445818	0.677958	187.486	0.19803	0.3272	0.468568	225.749	0.810408	1.28546e-06	3.93937e-06	517.377	-1.65941	8.90613e-35	7.19847e-34	134.698
ENSMUSG00000006179	Prss16	-0.931834	0.179283	-0.789811	-0.732201	-0.821224	-0.858964	-1.06377	-0.958955	-1.00473	-1.01182	-0.695085	-0.42927	-0.379887	-1.07215	-0.862564	-1.03329	-0.94502	-0.824274	-0.691343	-0.847183	-0.83015	-1.08369	-1.0714	-0.787066	-1.07133	-0.799402	-0.501414	-0.989336	-0.820212	-0.92034	-0.976596	1.75487	2.63535	0.115523	0.294734	1.85237	1.57167	0.293721	0.432086	2.46973	2.46823	0.086929	0.131363	2.00366	2.97959	0.0683242	0.0992083	0.383994
ENSMUSG00000006191	Cdkal1	5.62257	5.43779	6.18573	4.74551	5.88485	5.29235	5.5831	5.92677	5.61999	5.72717	4.94774	5.33578	5.27862	5.4822	5.63519	5.74449	5.01211	5.2381	5.28934	5.36158	5.58935	5.60856	5.87961	5.89444	5.89328	5.60258	5.18738	5.62063	5.17985	5.51983	5.88911	84.6036	-0.620116	0.00832093	0.0415488	56.5118	0.156261	0.600267	0.722699	93.849	-0.224334	0.354676	0.440224	97.3333	-0.67182	0.00307479	0.00561786	50.1795
ENSMUSG00000006200	Rhox6	0	0	0	0	0	0	0	0	0	0	0	0	0	0	0	0	0	0	0	0	0	0	0	0	0	NA	NA	NA	NA	NA	NA	NA	NA	NA	NA	NA	NA	NA	NA	NA	NA	NA	NA	NA	NA	NA	NA	NA
ENSMUSG00000006204	Cdcp3	-1.04057	-1.09787	-0.881759	-0.817341	-0.916884	-0.959084	-1.20253	-0.21122	0.290319	-1.13	-1.24445	-1.24798	-1.22935	-1.21798	-1.23235	-1.15401	-1.05531	-1.22587	-1.18528	-0.731621	-0.243289	-0.0795848	-1.21693	-1.21945	-1.21683	-0.796695	-1.24059	-1.20145	-1.15549	-0.351498	-1.21774	0	NA	NA	NA	0	NA	NA	NA	2.66484	-5.02019	0.00179681	0.00379145	0	NA	NA	NA	0
ENSMUSG00000006205	Htra1	7.95865	8.21379	7.78503	8.76685	7.73433	8.09867	7.9281	8.66605	7.99801	8.16843	6.6506	6.43882	6.64745	6.24504	6.59785	6.75528	9.27253	9.60202	9.69352	11.7507	11.8222	11.858	6.74935	6.90735	6.69312	8.13179	6.57895	6.53272	9.52269	11.8103	6.78327	111.554	0.0507293	0.818493	0.918756	856.603	-3.98907	3.57277e-103	9.28722e-101	7612.53	-6.6876	0	0	128.361	-0.0183218	0.928161	0.943068	596.617
ENSMUSG00000006215	Zbtb17	4.58188	4.20105	3.76743	2.61162	3.64022	4.43133	4.346	3.31003	4.77562	4.57317	4.59941	4.53339	4.42891	4.44115	4.22857	3.32111	4.13185	4.64892	3.69954	4.27811	4.33137	4.49627	4.74532	4.56764	4.79183	4.02383	4.52057	3.99695	4.1601	4.36858	4.7016	41.8692	0.565124	0.0952613	0.25878	38.1852	0.542234	0.172643	0.288053	57.0954	0.471066	0.0801095	0.122154	56.6098	0.0554248	0.833857	0.864364	20.7672
ENSMUSG00000006216	Clcnkb	0	0	0	0	0	0	0	0	0	0	0	0	0	0	0	0	0	0	0	0	0	0	0	0	0	NA	NA	NA	NA	NA	NA	NA	NA	NA	NA	NA	NA	NA	NA	NA	NA	NA	NA	NA	NA	NA	NA	NA
ENSMUSG00000006218	Fam131c	0.821331	1.0933	0.37752	0.503685	2.49102	1.01674	0.810911	1.17022	1.02567	1.28626	0.720093	0.371205	0.241116	-0.0955077	0.67811	-0.0031799	2.89346	2.23299	0.855597	0.236662	0.948913	0.185501	-0.0910283	-0.101788	0.369969	1.05966	0.444138	0.193141	1.99401	0.457025	0.0590509	1.41531	0.738533	0.66058	NA	10.2258	-3.35811	0.000248364	0.00100152	2.37963	0.153155	0.9026	0.928765	1.27803	2.25766	0.22067	0.279102	6.8794
[truncated: 40,646 more rows]
[truncated: 24 more columns]
