# Supplementary material for: Prions induce minor genome-wide translational changes in neurons compared to glia
Source: bioRxiv preprint, doi:10.1101/2020.06.26.172841, version 1 (2020-06-27)
Supplement: Supplementary File 3 [file 172841_file06.xlsx]

## Sheet: SupplementaryTable3
GeneID	MGIsymbol	CDSlength	RP_CamKIIaCX_1_fpkm	RP_CamKIIaCX_2_fpkm	RP_CamKIIaCX_3_fpkm	RP_CamKIIaHC_1_fpkm	RP_CamKIIaHC_2_fpkm	RP_CamKIIaHC_3_fpkm	RP_PV_1_fpkm	RP_PV_2_fpkm	RP_PV_3_fpkm	RP_GFAP_1_fpkm	RP_GFAP_2_fpkm	RP_GFAP_3_fpkm	RP_Cx3Cr1_1_fpkm	RP_Cx3Cr1_2_fpkm	RP_Cx3Cr1_3_fpkm	RP_CamKIIaCX_fpkm	RP_CamKIIaHC_fpkm	RP_PV_fpkm	RP_GFAP_fpkm	RP_Cx3Cr1_fpkm	RT_CamKIIaCX_fpkm	RT_CamKIIaHC_fpkm	RT_PV_fpkm	RT_GFAP_Input_fpkm	RT_GFAP_fpkm	RT_Cx3Cr1_CtrlIP_fpkm	RT_Cx3Cr1_fpkm	RT_Cx3Cr1_SortIP_fpkm	RT_Cx3Cr1_Sort_fpkm	PTG	Zhang	Hrvatin
ENSMUSG00000000001	Gnai3	1065	33.748	30.5039	28.1893	31.1754	35.8916	31.1891	29.9517	28.4854	24.7998	113.329	100.68	92.1835	136.514	115.446	99.0315	4.99158	5.0769	4.84527	6.6874	6.88261	11.0858	10.7622	10.2534	3.57046	4.64578	0.433934	0.203737	0.981609	1.30127	none	none	none
ENSMUSG00000000003	Pbsn	525	0	0	0	0	0	0	0	0	0	0	0	0	0	0	0	0	0	0	0	0	NA	NA	NA	0	0	0	0	0	0	none	none	none
ENSMUSG00000000028	Cdc45	1701	1.23565	1.06103	1.43658	1.92441	1.13303	2.16973	0.625094	0.81999	1.32146	1.32628	0.974063	1.21624	1.88793	0.740586	0.459288	1.16634	1.45543	0.942745	1.11915	1.02096	8.29511	8.30773	7.89817	1.01436	1.67506	0.0150688	0.0291476	0	0.0497816	none	none	none
ENSMUSG00000000037	Scml2	2910	0	0	0	0	0	0.253657	0	0	0	0.0775257	0	0.0646307	0	0.0865799	0.17898	0	0.1171	0	0.0667925	0.122368	NA	NA	NA	0.137504	0.0191088	0	0	0	0	none	none	none
ENSMUSG00000000049	Apoh	1038	1.01245	0.86937	0.336309	0.901023	0.928367	0	0	0.67187	1.08276	0.217341	0.228032	0.543571	0	0	0	0.79857	0.686879	0.664371	0.411044	0	NA	NA	NA	0.378512	0.341037	0.19584	0.0173186	0	0	none	none	none
ENSMUSG00000000056	Narf	1389	32.534	37.1617	39.7092	30.9734	28.4445	29.7595	56.6473	45.188	46.9305	12.1814	12.099	12.7279	24.8015	21.4037	17.4361	5.2276	4.94138	5.66074	3.73727	4.47338	12.4917	12.3256	13.1389	3.82171	3.08406	1.05525	0.630576	0.871557	1.63615	none	none	none
ENSMUSG00000000058	Cav2	489	83.816	84.8889	87.0938	25.8201	38.756	15.0949	21.7441	17.8272	12.6411	151.784	150.054	194.614	34.6272	36.0661	27.6925	6.43072	4.78435	4.20196	7.37924	5.07875	12.5194	11.5921	10.2029	3.4489	3.53688	1.28707	0.567424	1.12629	1.01943	none	none	none
ENSMUSG00000000078	Klf6	957	60.1783	59.0289	63.106	29.3186	29.537	33.1663	11.1106	10.5667	9.98244	21.9235	22.2599	24.5658	111.957	87.9315	87.0775	5.94886	4.98522	3.53023	4.57993	6.59478	11.3028	10.7363	9.99303	3.57773	2.60565	2.86371	3.59391	4.43838	4.78228	none	none	none
ENSMUSG00000000085	Scmh1	2121	6.73859	8.16888	8.8877	7.49621	7.26936	10.0925	10.5276	7.89139	5.56389	4.68005	2.78993	3.81294	9.22215	10.572	8.10348	3.15894	3.21506	3.16901	2.25126	3.36446	12.8269	12.7773	12.3225	3.41684	2.67205	1.38295	1.92019	1.59794	1.27261	none	none	none
ENSMUSG00000000088	Cox5a	441	732.072	736.249	873.118	784.687	803.402	741.49	1755.26	1740.34	1773.78	633.828	564.102	555.27	278.703	211.956	211.994	9.61006	9.60275	10.7793	9.19328	7.87785	14.9867	15.1342	16.3778	7.55259	7.47838	5.48233	3.433	4.00527	2.83179	none	none	none
ENSMUSG00000000093	Tbx2	2136	0	0	0	0	0	0.345572	0	0	0.526173	0	0.554067	0.0880503	0	0	0	0	0.15729	0.233141	0.279815	0	NA	NA	NA	0.238787	0.0285692	0.615432	0.280225	0.245382	0.0812203	none	none	none
ENSMUSG00000000094	Tbx4	1659	0	0	0.210421	0	0	0	0	0	0	0	0	0	0	0	0	0.0978001	0	0	0	0	NA	NA	NA	0.0285692	0	0	0	0	0	none	none	none
ENSMUSG00000000103	Zfy2	2334	0	0	0	0	0	0	0	0	0	0	0	0	0	0	0	0	0	0	0	0	NA	NA	NA	0	0	0	0	0	0	none	none	none
ENSMUSG00000000120	Ngfr	1284	0.32739	0.421685	0	0.728397	0	1.14975	12.4215	15.7513	11.8168	2.28411	3.68687	1.17181	0.909479	0.784883	0	0.321572	0.701372	3.84095	1.75742	0.645967	NA	NA	NA	1.42223	0.771181	0.440144	0.0490954	0.0391363	0	PV	none	none
ENSMUSG00000000125	Wnt3	1068	0	0	0	0	0	0.691144	18.9161	27.4259	27.361	2.74606	1.99464	4.22641	0.546709	0.707717	0.487671	0	0.299106	4.67625	1.99604	0.660563	NA	NA	NA	1.91839	1.61039	0.407543	0.098449	0.0402376	0.0136563	PV	none	none
ENSMUSG00000000126	Wnt9a	1098	4.5942	3.12308	4.45104	0	0.292546	1.34452	0	0	0	0.410928	0.862286	1.02773	0	0.688381	0.237173	2.33803	0.62825	0	0.821288	0.387934	9.0849	7.20667	5.36958	2.63691	1.33724	1.10762	0.258171	0.118511	0.0446073	none	none	none
ENSMUSG00000000127	Fer	2472	11.7336	13.6529	16.6636	20.6197	19.7511	21.2007	6.45197	11.0027	9.54774	16.8835	15.1287	14.1513	19.2503	16.9188	25.7045	3.9085	4.42786	3.32204	4.03455	4.4346	10.0545	10.6383	9.19728	2.45943	2.55745	0.0250864	0.0804532	0.03386	0.0508206	none	none	none
ENSMUSG00000000131	Xpo6	3378	22.5864	22.1728	21.1851	21.042	23.2971	19.2293	17.627	15.6905	9.81504	7.41313	5.46548	6.12442	8.55605	10.591	9.09684	4.5224	4.4718	3.94275	2.87467	3.38054	14.0922	14.0754	13.7279	4.2555	3.6997	2.72402	2.96169	2.95251	2.91653	none	none	none
ENSMUSG00000000134	Tfe3	1719	15.4062	18.4786	18.6831	11.1535	13.8278	13.3115	18.5564	16.0252	15.6915	12.7302	16.248	17.2867	66.7444	64.6357	71.0502	4.21122	3.78285	4.15038	4.03753	6.09754	11.4109	11.1353	11.1797	3.84197	3.99337	2.00807	4.39071	4.19917	4.00086	Cx3cr1	none	none
ENSMUSG00000000142	Axin2	2523	4.74852	4.14899	5.25778	2.03882	2.29166	3.21822	3.79293	2.90238	4.67737	5.7227	5.81658	7.60353	0.347138	1.39804	0.412868	2.51562	1.81403	2.2603	2.8838	0.781863	11.458	10.9237	10.8548	2.65992	2.40054	0.673376	0.528936	0	0	none	none	none
ENSMUSG00000000148	Brat1	2604	4.68153	5.2675	3.8877	4.13038	4.93418	3.11811	2.44996	4.1512	2.37384	4.5917	4.99937	5.9225	5.942	6.38576	6.90043	2.48858	2.33939	1.99699	2.62555	2.88936	10.696	10.3244	10.1638	2.50589	2.68407	0.548329	0.979197	2.19441	1.39607	none	none	none
ENSMUSG00000000149	Gna12	1140	5.89992	5.85772	2.75597	5.74284	4.79005	3.23746	4.66353	4.89404	2.95765	47.6926	46.3013	58.4024	74.5223	62.5448	83.8358	2.54544	2.48288	2.37065	5.69485	6.22177	9.27228	9.38232	9.57996	4.77189	5.44846	0.0177628	0.0259992	0.0344871	0.0437004	none	none	none
ENSMUSG00000000154	Slc22a18	1233	0.170466	0.146376	0	0	0	0	0	0	0.455761	0.731872	0.383937	1.37281	1.65742	0.408674	0.633616	0.144848	0	0.204041	0.871482	0.925926	NA	NA	NA	0.263034	0.936088	0.104517	0.012237	0.0364307	0.0320542	none	none	none
ENSMUSG00000000157	Itgb2l	2388	0	0	0	0	0	0	0	0	0	0	0	0	0	0	0	0	0	0	0	0	NA	NA	NA	0	0	0	0	0	0	none	none	none
ENSMUSG00000000159	Igsf5	1119	0	0	0	0	0	0	0	0	0	0	0	0	0.260896	0	0	0	0	0	0	0.120306	NA	NA	NA	0.0840643	0.00958605	0.0157609	0	0	0	none	EC	none
ENSMUSG00000000167	Pih1d2	948	2.21714	1.14229	1.84119	1.47985	1.35534	0	0	1.47131	1.18555	3.56961	5.99234	5.75336	0.307957	1.06307	0	1.45077	0.959815	0.91504	2.61002	0.543009	7.54157	6.96762	5.55536	0.641546	1.1021	0	0	0	0	GFAP	none	none
ENSMUSG00000000168	Dlat	1929	81.6113	84.393	85.2363	89.6959	91.5854	91.4546	106.935	118.584	140.124	60.9318	57.5485	61.2293	18.464	18.0242	18.2251	6.40509	6.52218	6.94112	5.92845	4.26587	13.734	14.0218	14.7526	4.61824	4.71955	1.89431	0.929088	0.956226	1.25693	none	none	none
ENSMUSG00000000171	Sdhd	480	77.9435	75.5765	63.2724	55.5312	50.1898	53.8228	137.341	110.422	81.9514	76.1399	95.6652	127.735	55.3475	62.9868	54.2534	6.19503	5.75972	6.79318	6.65602	5.87109	14.2128	14.436	15.0296	6.19456	6.47335	4.11796	3.64149	4.17924	3.46309	none	none	none
ENSMUSG00000000182	Fgf23	756	0	0	0	0	0.424888	0	0	0	0	0.298412	0	0	0	0	0	0	0.191094	0	0.136809	0	NA	NA	NA	0.111031	0.0379679	0	0	0	0	none	none	none
ENSMUSG00000000183	Fgf6	627	0	0	0	0	0	0	0	0	0	0	0	0	0	0	0	0	0	0	0	0	NA	NA	NA	0	0	0	0	0	0	none	none	none
ENSMUSG00000000184	Ccnd2	870	42.2785	44.8091	36.1127	41.388	41.3518	45.8157	3.6665	2.00403	1.29185	55.4923	56.5897	73.0684	15.1005	7.52946	3.89128	5.39461	5.45457	1.73153	5.97078	3.29872	10.6179	10.8971	8.23526	3.47249	4.54885	2.56159	1.33355	0.293672	0.198884	none	none	EndoSM
ENSMUSG00000000194	Gpr107	1656	38.3308	43.9215	34.15	35.0159	37.4363	34.3218	44.3035	61.907	58.3671	71.1129	77.1839	68.3704	52.8882	53.7062	55.0397	5.31472	5.19343	5.80372	6.19421	5.77816	11.4574	10.8644	11.5309	3.83592	4.65076	0.965123	1.3764	1.68656	1.30174	none	none	none
ENSMUSG00000000197	Nalcn	5220	43.2851	42.8038	46.3446	48.1069	47.69	45.6743	29.1283	37.3417	43.5998	10.286	9.11421	4.82799	3.13195	4.53698	3.84139	5.49648	5.58967	5.23611	3.18207	2.27405	10.2014	9.30747	9.91493	4.05485	2.666	0.0925963	0.0192988	0.00756075	0	none	none	none
ENSMUSG00000000202	Btbd17	1437	0.438799	0.251192	0.728787	0	0.447063	0	0	0.727976	1.56424	115.861	132.926	196.321	0.812645	2.10394	1.44978	0.558685	0.200405	0.818909	7.22274	1.29599	7.14405	7.40487	7.30024	3.37573	6.5436	4.6011	2.6489	1.88373	0.642077	GFAP	none	none
ENSMUSG00000000204	Slfn4	1809	0	0	0	0	0	0	0	0	0	0	0	0	0	0	0	0	0	0	0	0	NA	NA	NA	0	0	0	0	0	0	none	none	none
ENSMUSG00000000214	Th	1497	0.140404	0.120562	0.699577	0	0	0	21.3083	8.15265	5.2554	3.31543	4.26909	1.38198	0.585056	0.673206	0.695835	0.400736	0	3.65216	1.99597	0.72366	6.285	4.60554	8.92517	2.08406	0.230613	1.20388	0.388936	0.0862678	0.0203407	none	none	none
ENSMUSG00000000215	Ins2	333	0	0	0	0	0	0	0	0	0	0	0	0	0	0	0	0	0	0	0	0	NA	NA	NA	0.0285692	0.0285692	0.0139397	0	0	0	none	none	none
ENSMUSG00000000216	Scnn1g	1968	0	0	0.177383	0.237617	0.489657	0	2.70143	1.2403	3.141	0.114634	0.360819	0.0955668	0	0.128022	0	0.0828763	0.313159	1.74885	0.251374	0.0602882	NA	NA	NA	0.31034	0.318076	0.0125664	0	0	0.0115022	PV	none	none
ENSMUSG00000000223	Drp2	2946	35.1021	31.2442	32.1124	24.1276	22.7882	21.5479	2.52647	4.02438	2.86127	14.3201	13.8194	20.1099	1.38737	2.48013	1.67953	5.07979	4.57418	2.04872	4.0945	1.51046	13.007	12.4399	12.1593	3.44095	3.73841	0.680485	0.342644	0.0800743	0.0115639	none	none	none
ENSMUSG00000000244	Tspan32	771	0	0	0	0	0	0	0	0	0	0.292607	0	0.243937	4.54386	5.22848	4.39094	0	0	0	0.237378	2.51629	NA	NA	NA	0.0840643	0.0931094	0.326853	1.65755	2.96019	2.2089	Cx3cr1	none	none
ENSMUSG00000000247	Lhx2	1221	24.7884	19.6593	18.8697	10.3407	17.626	13.2999	0	1.14234	0.46024	63.5596	76.379	78.0952	1.43461	2.68249	1.27969	4.46635	3.88319	0.617482	6.20316	1.48487	11.3827	11.7567	8.14976	4.08406	5.68257	1.62645	0.50877	0.169255	0.0921352	GFAP	none	none
ENSMUSG00000000248	Clec2g	810	0	0	0	0	0	0	0	0	0	0.278518	0	0	0	0	0	0	0	0	0.128081	0	NA	NA	NA	0	0	0	0	0	0	none	none	none
ENSMUSG00000000253	Gmpr	1038	61.7595	57.3784	52.8006	127.495	126.258	99.5567	47.1205	44.3434	37.8966	27.1676	31.4684	39.6807	48.6571	41.0203	52.9363	5.86574	6.89202	5.46337	5.07777	5.60104	12.5962	14.039	13.576	4.67582	4.50165	1.85549	1.82234	1.73702	1.15001	none	none	none
ENSMUSG00000000263	Glra1	1374	1.83567	2.23303	2.28661	0.340343	0	1.07444	77.3861	106.336	116.153	5.41833	4.30672	4.24333	4.67449	5.1343	3.79063	1.64082	0.557381	6.65762	2.49981	2.4681	5.56251	2.01858	5.09094	0.925999	0.0658021	0.550073	0.2103	0.00796548	0.00638313	PV	none	none
ENSMUSG00000000266	Mid2	2148	9.68728	12.0993	9.91361	7.40198	5.98166	7.56011	17.8204	14.2857	11.7728	15.4391	17.1903	15.7605	0.951397	2.81505	1.57608	3.53191	2.99661	3.9659	4.09845	1.47552	9.92411	10.0404	10.5749	2.74416	2.92347	0.173201	0.00628319	0	0	none	none	none
ENSMUSG00000000275	Trim25	1905	0.441333	0.378963	0.366498	0.736427	0.337234	0	0	0.36609	0	5.2107	6.83378	6.41727	22.8344	18.7803	13.3967	0.480883	0.441363	0.166111	2.83873	4.2733	NA	NA	NA	0.956057	1.88232	0.361321	1.63245	0.875148	1.36995	none	none	none
ENSMUSG00000000276	Dgke	1695	80.1058	86.0347	76.6142	67.0409	73.5289	79.2577	75.2768	74.8832	93.493	18.2343	15.5005	10.874	5.85608	8.91849	6.76007	6.35611	6.21482	6.36138	3.98819	3.03179	11.5513	10.8342	11.383	3.91265	2.71223	0.964826	0.277622	0.291282	0.339992	none	none	none
ENSMUSG00000000278	Scpep1	1359	14.8475	14.8741	14.128	6.53789	4.49086	7.60411	35.2081	26.9416	26.0508	56.9394	60.2629	62.5534	129.323	147.572	148.125	3.965	2.85019	4.92601	5.92881	7.15657	11.0296	9.56192	11.1446	3.04963	3.68557	0.547067	2.04492	2.38302	1.95223	none	none	none
ENSMUSG00000000282	Mnt	1776	10.1779	8.53627	7.27269	6.05603	7.77716	5.40307	5.98696	5.10485	7.59396	4.57297	6.93033	7.41288	16.1095	12.6257	17.7423	3.27236	2.88988	2.85371	2.86896	4.04374	11.0406	10.8834	10.1745	3.45943	2.77118	2.54198	2.09077	2.74906	2.53902	none	none	none
ENSMUSG00000000290	Itgb2	2313	2.54439	0.546203	0	0	0	0	0	0	0	0.390142	0.204667	0.325249	587.546	744.078	605.837	1.02162	0	0	0.385913	9.33722	NA	NA	NA	1.40054	1.29474	0.438331	3.19872	4.50402	3.66403	Cx3cr1	MG	none
ENSMUSG00000000295	Hddc2	600	25.2222	21.3569	30.8362	25.7197	33.7276	17.2233	12.405	8.71752	12.1756	48.8799	54.8349	37.3016	16.5434	9.65798	17.7951	4.74444	4.73101	3.59686	5.58513	3.96952	10.6208	10.7225	9.21535	3.28392	4.20163	2.56967	2.59873	2.10187	1.69881	none	none	none
ENSMUSG00000000296	Tpd52l1	630	47.0413	48.9878	43.2205	57.1549	52.5161	63.2693	5.06326	14.3908	15.1638	35.8095	34.941	34.0327	3.24381	1.59967	3.30687	5.56732	5.87398	3.64838	5.16703	1.89405	12.0399	12.514	8.33616	3.88753	2.94735	0.257276	0.0791127	0.0309283	0.00345238	none	none	none
ENSMUSG00000000301	Pemt	711	1.77371	2.53841	1.96393	1.31542	1.35534	1.03817	0	2.45218	0.79037	3.49029	3.99489	3.17427	1.64244	1.77178	0.366268	1.62855	1.16112	1.05717	2.18687	1.17643	7.66006	7.52222	7.89891	1.55582	1.65382	0.0851897	0.0904279	0.0133996	0.029268	none	none	none
ENSMUSG00000000303	Cdh1	2655	0.158331	0.0679779	0	0	0	0	10.4126	5.38483	7.6197	0.594801	3.47691	0.212515	0.219919	0.284686	0.392341	0.104922	0	3.13844	1.27981	0.377382	NA	NA	NA	0.604071	0.776806	0.0532597	0.0138098	0	0	none	none	none
ENSMUSG00000000305	Cdh4	2742	11.5747	11.2554	9.42107	3.75196	4.92014	4.30717	2.32666	3.30643	2.45931	13.9868	16.315	15.1585	1.17118	1.47015	0.949731	3.55464	2.41317	1.88654	4.01377	1.13555	9.51958	7.44373	6.64366	2.45418	2.63227	0.157708	0.0644486	0.0110663	0.00131487	none	none	none
ENSMUSG00000000308	Ckmt1	1257	315.862	320.903	291.88	336.679	325.559	325.323	235.158	188.637	135.012	27.2801	23.9145	17.8051	20.2061	43.6949	26.9325	8.27867	8.36714	7.54897	4.58496	4.96707	15.5629	15.7208	15.7756	7.18943	6.04876	5.90719	4.30518	1.74682	1.31206	none	none	none
ENSMUSG00000000317	Bcl6b	1425	0.442494	0.253307	0.244975	0	0	0.517994	0.746165	0	0	0.474947	0.332207	0.263966	0	0	0	0.393517	0.229791	0.320452	0.440463	0	NA	NA	NA	0.731183	0.422233	0.652575	0.108197	0	0	none	none	none
ENSMUSG00000000318	Clec10a	927	0.226736	0.194694	0	0	0	0	1.14702	1.12848	1.21241	0	0.766011	0.202886	94.165	51.0961	42.4195	0.189637	0	1.11279	0.403776	5.99005	NA	NA	NA	0.505891	0.222392	0.480984	3.02092	0.37461	0.137549	Cx3cr1	none	Macrophage
ENSMUSG00000000320	Alox12	1992	0	0	0.175245	0	0	0	0	0	0	0	0	0	0	0.12648	0.130731	0.0819056	0	0	0	0.118675	NA	NA	NA	0.0840643	0	0.0638074	0.0471242	0.0530192	0	none	none	none
ENSMUSG00000000325	Arvcf	2889	7.63911	6.4346	5.67919	6.96024	4.55861	4.08801	3.31241	2.17259	0.778059	2.65503	4.58811	4.16643	13.238	11.5988	14.3324	2.92302	2.6328	1.62653	2.26399	3.81315	12.1674	11.867	11.4198	3.04264	3.13203	0.962532	1.0894	1.37798	1.09507	none	none	none
ENSMUSG00000000326	Comt	798	165.672	149.949	153.984	131.851	92.9833	97.1239	211.857	149.006	113.376	93.2931	91.3569	110.064	302.186	317.934	337.105	7.29953	6.75915	7.31361	6.63282	8.32227	12.8338	12.4622	12.8542	5.25852	5.40713	3.86509	5.27359	5.77618	5.53141	none	none	none
ENSMUSG00000000339	Rtca	1101	72.3524	69.5041	79.5834	62.4358	60.3919	75.088	93.6772	76.011	64.3107	31.5553	24.7232	30.2356	23.8645	18.078	25.0719	6.22522	6.06548	6.30377	4.89908	4.54462	13.3808	13.4466	13.7321	4.79077	4.44493	2.09359	1.72864	1.46364	1.55087	none	none	none
ENSMUSG00000000340	Dbt	1449	8.7033	7.47334	7.70935	9.35908	13.3008	12.226	10.2733	23.5836	15.125	55.8939	54.5596	68.6625	32.2366	24.1689	30.5526	3.16382	3.65862	4.11498	5.92375	4.90622	9.87386	10.5173	11.281	2.76553	3.87119	0.388846	0.183162	0.599769	0.732616	none	none	none
ENSMUSG00000000346	Dazap2	507	74.6218	77.6034	61.9685	50.7292	57.654	59.692	176.165	125.862	108.622	419.606	425.775	521.195	394.44	357.795	362.631	6.17788	5.83352	7.1073	8.83455	8.54157	14.2206	14.3149	14.905	6.11061	7.52555	3.92622	5.47982	5.30932	5.07015	none	none	none
ENSMUSG00000000355	Mcts1	546	209.415	257.83	294.104	296.338	328.275	378.534	112.95	225.442	280.976	127.261	95.8061	92.6599	135.812	112.592	102.545	7.99313	8.38966	7.69666	6.73122	6.88244	12.7354	12.8354	12.9416	4.77294	4.52607	1.45905	0.577119	1.46609	2.18097	none	none	none
ENSMUSG00000000359	Rem1	894	0	0	0	0	0	0	0	0	0	0.252349	0.264762	0	0	0	0.291293	0	0	0	0.229428	0.133692	NA	NA	NA	0.163499	0.0379679	0.0511313	0.0356668	0	0	none	none	none
ENSMUSG00000000365	Rnf17	4923	0.256167	0.586573	0.709098	0.189978	0.456735	0.59975	0	1.06246	0.456594	0.0458256	0	0.0764068	0.770924	0.511776	0.528979	0.601487	0.501299	0.591059	0.0576155	0.681578	NA	NA	NA	0.137504	0.0285692	0	0.00285027	0	0.0479341	none	none	none
ENSMUSG00000000374	Trappc10	3777	25.5983	23.3665	23.0138	19.4382	22.9621	19.1522	22.2397	18.8337	15.6222	15.1117	12.2203	14.5899	13.6812	13.8748	11.9969	4.64345	4.42744	4.31459	3.90438	3.82622	13.4084	13.3936	13.6096	4.48156	4.15489	1.42562	1.24122	0.888201	1.22124	none	none	none
ENSMUSG00000000378	Ccm2	1362	10.9568	11.396	7.94549	12.7036	10.377	6.50345	18.7363	11.2649	8.25188	6.12862	6.77768	8.69953	29.3658	23.6779	24.0914	3.47241	3.44113	3.78147	3.03597	4.7394	11.5131	11.921	11.8921	4.68257	3.72973	2.37739	2.48928	2.2102	2.05994	none	none	none
ENSMUSG00000000381	Wap	405	0	0	0	0	0	0	0	0	0	0	0	0	0	0	0	0	0	0	0	0	NA	NA	NA	0	0.00958605	0	0	0	0	none	none	none
ENSMUSG00000000384	Tbrg4	1893	16.7659	12.5851	14.0152	12.8456	10.3508	5.84899	16.8508	13.0786	13.0618	5.12456	6.75206	6.06054	6.01467	5.05758	5.09002	3.95004	3.41709	3.93832	2.80303	2.67523	12.054	12.2085	12.939	3.31615	2.87447	2.4091	2.31892	2.25686	2.15137	none	none	none
ENSMUSG00000000385	Tmprss2	1473	0	0	0	0	0	0	1.4437	0	0	0.153157	0	0	0	0	0	0	0	0.566799	0.0718343	0	NA	NA	NA	0.0565835	0.0285692	0	0.0065712	0	0	none	none	none
ENSMUSG00000000386	Mx1	1884	0	0	0.185291	0	0	0	0	0	0	0	0.251271	0.0998277	0.464877	0.53492	0.138225	0.0864629	0	0	0.159672	0.463979	NA	NA	NA	0.0840643	0.0473057	0.159215	0.392426	0.494178	1.40206	none	none	none
ENSMUSG00000000392	Fap	2286	1.47111	1.42111	1.67978	0	0.281028	0.96869	0.930258	0.61015	0.245824	0.296063	0.310626	0	0.638545	0.220426	0.341754	1.33571	0.502405	0.673928	0.265713	0.485676	8.0421	4.36141	4.14834	0.526069	0.128733	0.0767293	0	0	0	none	none	none
ENSMUSG00000000394	Gcg	543	0	0.332378	0	0	0	0	0	0	0	0.415469	0.435907	0	0	0	0	0.15159	0	0	0.360411	0	NA	NA	NA	0.0285692	0	0.0462929	0	0	0	none	none	none
ENSMUSG00000000399	Ndufa9	1134	171.447	182.073	164.078	152.99	151.826	152.315	202.53	203.87	137.763	118.37	112.922	144.954	103.493	105.756	95.5319	7.43906	7.26094	7.51086	6.98203	6.6808	14.1895	14.4286	15.2055	6.29315	6.78973	2.8762	3.21205	2.45788	2.41477	none	none	none
ENSMUSG00000000402	Egfl6	1653	0	0.327552	0	4.52637	3.30348	7.5913	0	1.05475	1.6998	25.5216	19.6174	16.4978	0.176614	0	0.157542	0.149499	2.61833	0.93974	4.42932	0.152359	4.60529	7.99587	5.21074	0.863938	2.85067	0.00682576	0	0	0	GFAP	none	none
ENSMUSG00000000409	Lck	1563	1.21028	0.346413	0	0.598376	0	0.47226	0	0	0	0.288675	0.151438	0.12033	0	0	0	0.603023	0.440292	0	0.247094	0	NA	NA	NA	0.62293	0.378512	0.592141	0.240264	0	0.0588367	none	none	none
ENSMUSG00000000411	Tssk3	807	0	0	0	0	0.796072	0	0	0	0	0	0.879916	0	0	0	0	0	0.339545	0	0.371063	0	NA	NA	NA	0.0565835	0.0191088	0.299745	0	0	0	none	none	none
ENSMUSG00000000416	Cttnbp2	4947	18.9493	19.2265	17.2181	30.5326	32.9851	31.9309	18.4844	21.992	19.1975	5.15318	4.11481	3.34559	1.94747	2.85204	1.84244	4.28278	5.03634	4.38483	2.37977	1.68436	13.5142	14.3414	12.3912	3.67582	1.81831	0.15431	0.0474308	0.0237881	0.00809776	none	none	none
ENSMUSG00000000420	Galnt1	1680	23.2704	23.9567	24.5193	26.7218	17.9727	33.8315	43.6706	56.0412	75.596	116.694	117.503	116.428	110.695	127.323	116.412	4.63897	4.76423	5.89326	6.88111	6.89656	11.0787	10.395	12.2445	3.75702	4.69562	0.32416	0.562746	0.791394	1.18306	none	none	none
ENSMUSG00000000435	Myf5	768	0	0	0	0	0	0	0	0	0	0	0	0	0	0	0	0	0	0	0	0	NA	NA	NA	0	0	0	0	0	0	none	none	none
ENSMUSG00000000439	Mkrn2	1251	14.9532	15.7254	14.2314	9.34514	17.2034	13.571	31.4481	18.1179	15.7221	15.5088	13.6229	17.5898	13.5353	11.2782	9.36749	3.99729	3.8453	4.5086	4.05084	3.63153	11.8956	12.0673	12.3165	3.93168	3.70487	1.22545	0.948024	0.768048	0.730719	none	none	none
ENSMUSG00000000440	Pparg	1518	3.04615	2.61567	3.4495	0.616115	0.423208	0	2.10135	1.14855	0.370193	1.04031	0.779636	0.991175	0.384641	0.331946	0.686209	2.01332	0.429151	1.14189	0.953855	0.553458	9.22728	7.50486	9.7149	1.38957	1.0658	0.0201438	0.00755012	0	0	none	none	none
ENSMUSG00000000441	Raf1	1947	16.8407	17.0563	12.3714	17.5332	18.8077	20.4723	25.1213	27.5808	20.2037	17.6123	14.71	20.8651	17.6935	18.3752	17.6553	4.03763	4.31743	4.66118	4.22721	4.24093	12.2205	12.2733	13.0185	4.58736	4.84499	2.11046	2.55141	1.87575	1.98609	none	none	none
ENSMUSG00000000486	2001-09-01	1101	0	0	0	0	0.583497	0	1.93149	0.316713	0.510402	1.22943	0.859936	0.854112	1.06065	1.60185	0.236527	0	0.256406	0.940757	0.986344	0.975512	5.53621	5.0869	8.0892	0.641546	0.436517	0.669248	0.148303	0.386169	0	none	none	none
ENSMUSG00000000489	Pdgfb	726	18.2392	19.3905	16.3485	14.8148	16.3705	13.2174	5.85832	2.40152	6.19232	2.79669	3.91235	1.03623	98.1185	95.7816	89.3163	4.24738	3.98193	2.54037	1.84067	6.576	12.8294	11.788	10.6359	3.24184	1.77961	1.57732	3.82723	4.32906	3.53499	Cx3cr1	none	none
ENSMUSG00000000530	Acvrl1	1509	2.64646	2.87048	2.31338	0	0.212866	0	0.704629	1.61756	0	1.04652	0.627428	0.747815	21.6684	21.0374	18.1204	1.85204	0.0988984	0.827058	0.853799	4.41111	7.13861	3.94722	6.75349	1.44361	0.471621	0.813836	2.32047	2.82946	1.87583	Cx3cr1	none	none
ENSMUSG00000000531	Grasp	1179	54.9083	50.8225	42.6368	54.7354	50.4027	41.3209	0	2.66184	0	4.78371	3.81446	2.55234	2.97143	2.35065	1.54615	5.65695	5.63864	0.916308	2.23782	1.71783	13.9782	13.9778	10.2319	4.35332	3.64616	3.03147	1.93791	0.338057	0.133886	none	none	none
ENSMUSG00000000532	Acvr1b	1518	115.754	105.935	104.635	80.711	83.1604	91.903	61.6397	65.9269	64.7838	25.562	27.1313	18.5845	15.578	22.4064	18.8707	6.7784	6.43059	6.02496	4.6299	4.31844	NA	NA	NA	5.03298	3.90111	0.0107901	0.0323011	0.0438351	0.0294269	none	none	none
ENSMUSG00000000538	Tom1l2	1524	188.394	163.073	162.633	134.398	128.781	126.414	175.819	185.791	142.701	83.0455	77.346	89.9652	20.6889	18.0199	17.9421	7.42934	7.03193	7.40176	6.40006	4.31351	14.3229	14.0853	14.66	6.19061	6.14459	1.77125	0.552387	0.327873	0.255542	none	none	none
ENSMUSG00000000544	Gpa33	960	0	0	0	0	0	0	0	0	0	0	0	0	0	0	0.271267	0	0	0	0	0.124887	NA	NA	NA	0	0	0	0	0	0.0165319	none	none	none
ENSMUSG00000000552	Zfp385a	1161	32.7678	28.2925	19.5442	12.0835	12.4502	8.90094	163.934	227.962	165.536	30.7018	39.7554	37.0967	87.5074	80.5103	61.9077	4.80055	3.60228	7.54544	5.20364	6.27876	11.6654	11.0865	15.5922	5.60051	4.99216	2.84912	3.3855	3.586	2.95912	none	none	none
ENSMUSG00000000555	Itga5	3162	0.66472	0.399547	0.552007	0.147891	0	0	0	0.441114	0.888603	1.28425	1.19771	0.951678	7.38628	7.17118	6.75336	0.621766	0.069423	0.52931	1.10067	3.01856	NA	NA	NA	0.565597	0.47854	0.0294927	0.039221	0.180754	0.260591	Cx3cr1	none	none
ENSMUSG00000000560	Gabra2	1356	74.5566	96.3631	102.976	137.599	171.267	172.56	7.84133	12.6005	31.4959	202.973	177.523	153.401	5.16713	5.57406	3.26481	6.52824	7.33517	4.19476	7.48354	2.50301	12.2578	12.6225	8.57745	4.31759	4.59852	0.0948751	0.0233615	0.0172187	0.00435579	none	none	none
ENSMUSG00000000561	Wdr77	1029	0.204261	0.175395	0.678501	0	0.624325	0	0	0	0	0	0	0	0	0.489694	0	0.435862	0.27275	0	0	0.218138	NA	NA	NA	3.80323	3.65076	2.48558	1.19869	2.31485	2.26047	none	none	none
ENSMUSG00000000562	Adora3	960	0	0	0	0	0	0	0	0	0	0	0	0	53.827	51.7017	48.0142	0	0	0	0	5.70545	NA	NA	NA	0.485427	0.429393	1.05604	3.79928	5.84312	5.38911	Cx3cr1	MG	none
ENSMUSG00000000563	Atp5pb	771	253.803	278.798	267.137	313.574	301.217	321.681	296.506	393.023	366.618	267.735	224.11	304.433	146.539	137.901	130.039	8.06382	8.29074	8.46372	8.05759	7.1206	15.099	15.3559	16.1713	NA	NA	NA	NA	NA	NA	none	none	none
ENSMUSG00000000567	Sox9	1524	5.79249	4.02648	4.35216	0.920534	1.68617	0.484345	2.09308	3.20329	1.47494	208.724	234.989	277.547	4.98065	3.47172	3.41754	2.51695	1.02173	1.70359	7.9154	2.30936	9.26027	8.38437	8.27421	2.69599	4.8646	3.75016	1.76678	1.13994	0.293954	GFAP	none	none
ENSMUSG00000000568	Hnrnpd	1068	151.341	154.119	167.68	230.313	229.181	248.121	179.205	187.737	310.968	143.64	132.09	110.415	181.508	162.775	191.898	7.31028	7.88796	7.82636	7.0192	7.48966	13.791	13.9052	13.4829	4.40054	4.39048	1.84736	1.55782	1.86927	2.29173	none	none	none
ENSMUSG00000000579	Dynlt1c	342	0	0	0	0	0	0	0	0	0	0	0	0	0	0	0	0	0	0	0	0	7.09689	6.6547	8.05909	0.333424	0.826464	0.390589	0.462795	0.670613	0.856897	none	none	none
ENSMUSG00000000581	C1d	426	119.401	144.046	126.196	165.757	176.442	175.005	114.815	151.431	204.466	97.4421	107.236	71.5217	88.4052	85.7567	108.201	7.03211	7.43797	7.3029	6.54019	6.57169	13.0899	13.3919	13.0776	3.33628	2.69748	1.28323	0.628262	1.16803	1.1771	none	none	none
ENSMUSG00000000594	Gm2a	582	49.1153	46.2057	52.1834	38.5675	34.7707	41.8534	127.886	133.609	131.315	674.861	763.369	820.164	847.236	806.058	831.363	5.6487	5.30002	7.0437	9.55803	9.69561	12.0903	11.5554	11.9336	4.19535	5.9397	2.23651	5.70316	3.58732	3.58045	none	none	OPC
ENSMUSG00000000600	Krit1	2211	22.1497	24.0805	28.104	23.6882	31.9617	32.3834	12.9845	21.7642	24.3996	20.5091	17.1287	14.1205	13.6002	9.6859	9.30479	4.68807	4.92336	4.37268	4.19004	3.56847	12.1482	12.2796	12.0498	2.32769	1.98793	0.650419	0.201712	0.36483	1.41636	none	none	none
ENSMUSG00000000605	Clcn4	2244	115.395	118.632	119.163	122.326	105.068	92.7612	127.935	124.314	115.696	122.049	128.369	122.45	41.7619	40.7562	42.0101	6.89154	6.75112	6.9501	6.96912	5.40971	13.7064	13.226	13.7314	5.80529	6.04104	3.95743	3.34488	4.07607	4.28884	none	none	none
ENSMUSG00000000606	Vmn2r88	2574	0	0	0	0	0	0	0	0	0	0	0	0	0	0	0	0	0	0	0	0	NA	NA	NA	0	0	0	0	0	0	none	none	none
ENSMUSG00000000617	Grm6	2616	0	0	0	0	0	0	0	0	0	0	0	0	0	0	0	0	0	0	0	0	NA	NA	NA	0	0	0	0	0	0.0382147	none	none	none
ENSMUSG00000000627	Sema4f	2334	15.4892	13.9962	13.0123	12.2217	10.5971	5.69261	11.8446	10.9062	10.1123	2.80308	2.83956	1.6922	1.25083	2.05099	0.557875	3.92276	3.39284	3.57947	1.78448	1.19318	12.2507	11.4461	10.8805	4.03034	3.04614	1.70625	0.734516	0.157685	0.0424807	none	none	Olig
ENSMUSG00000000628	Hk2	2754	0.228959	0.393205	0.126757	1.0188	0.699815	0.536051	0	0.506464	0	4.91503	4.72707	6.6243	104.205	76.3893	86.9945	0.321513	0.808638	0.225055	2.68305	6.49499	7.652	8.48517	5.00092	1.12433	2.31421	0.111526	1.77538	1.74105	2.42468	Cx3cr1	none	none
ENSMUSG00000000631	Myo18a	6252	23.3651	20.0631	17.3093	17.6521	16.852	12.1607	10.8846	7.52953	5.03349	6.20652	6.24681	5.62542	29.8387	30.224	37.5296	4.40911	4.04919	3.1401	2.81275	5.06741	14.9469	14.5198	14.2461	4.33914	4.60447	2.37993	0.880104	0.726204	0.786294	none	none	none
ENSMUSG00000000632	Sez6	2976	152.059	122.929	116.95	222.502	189.858	181.063	37.8724	38.5492	26.2471	34.6435	37.7793	14.4722	4.80685	8.71995	6.82543	7.04052	7.63523	5.13844	4.90521	2.96053	14.3275	14.4987	12.6989	5.27202	3.90175	1.22614	0.73532	0.149423	0.00812067	none	none	none
ENSMUSG00000000673	Haao	861	0	0	0	0	0.373072	0	0	0	0.652675	0.26202	0	0.218438	14.2411	12.5827	10.2836	0	0.169101	0.283991	0.214315	3.74083	NA	NA	NA	0.137504	0.137504	0.291361	1.34822	1.7453	1.92196	Cx3cr1	none	none
ENSMUSG00000000682	Cd52	225	6.53908	6.41711	4.65452	0	0	0	0	0	0	1.00267	2.10398	1.67178	1573.9	1128.72	1071.76	2.78036	0	0	1.37452	10.2982	NA	NA	NA	1.81558	1.37481	3.25088	9.4235	7.36337	7.60013	Cx3cr1	none	none
ENSMUSG00000000686	Abhd15	1380	0	0	0	0	0	0	2.31149	0.252682	0.407212	0.81739	0.686079	1.36287	18.4051	16.9791	17.9272	0	0	0.993102	0.967497	4.23039	NA	NA	NA	0.505891	0.78799	0.373877	3.23835	4.40423	4.94069	Cx3cr1	none	none
ENSMUSG00000000690	Hoxb6	675	0	0	0	0	0	0	1.57524	0.516594	1.66505	0.334222	0.350663	0.27863	0	0	0.385802	0	0	1.17139	0.401818	0.174535	NA	NA	NA	0	0	0.688222	0.35615	0.0802544	0	none	none	none
ENSMUSG00000000693	Loxl3	2265	0	0	0	0	0	0	0	0.307903	0	11.8527	12.4358	14.033	4.89794	5.22805	3.79414	0	0	0.140955	3.78386	2.49571	NA	NA	NA	1.73985	2.80598	0.3137	0.697332	1.01396	1.38369	none	none	none
ENSMUSG00000000701	Tcl1b5	366	0	0	0	0	0	0	0	0	0	0	0	0	0	0	0	0	0	0	0	0	NA	NA	NA	0	0	0	0	0	0	none	none	none
ENSMUSG00000000706	Btn1a1	1575	0.266901	0	0	0	0	0	1.3502	1.10699	0	0.143238	0.150284	0.597065	0	0	0	0.12296	0	0.863195	0.375025	0	NA	NA	NA	0.0565835	0.0749621	0	0.0387989	0	0	none	none	none
ENSMUSG00000000708	Kat2b	2442	0.688566	0.739071	0.428856	1.14897	0.526151	0	10.45	15.4217	16.3385	8.96117	7.65729	10.5513	8.60765	7.32525	6.825	0.694952	0.640041	3.91361	3.33007	3.10198	8.56619	9.46577	11.5559	2.9855	3.02975	0.204674	0.0398147	0.122633	0.385994	none	none	none
ENSMUSG00000000711	Rab5b	648	39.2474	45.1203	50.6395	33.196	45.1089	42.147	32.8174	29.5965	25.1491	50.8296	49.312	53.9846	40.5476	38.492	24.9164	5.52364	5.36284	4.91589	5.71082	5.15591	12.3529	12.6	12.3582	4.55704	4.45242	1.73499	1.59682	1.10775	1.08988	none	none	none
ENSMUSG00000000724	Cryba1	648	0.324359	0	0.538718	0	0	0	0	0	0	0.348148	0	0	0	0	0	0.364788	0	0	0.158401	0	NA	NA	NA	0.0285692	0	0	0	0	0	none	none	none
ENSMUSG00000000730	Dnmt3l	1266	0	0	0	0	0	0.583051	0	0	0	0	0	0	0	0	0	0	0.256226	0	0	0	NA	NA	NA	0.0840643	0.00958605	0	0.0428633	0	0	none	none	none
ENSMUSG00000000731	Aire	1659	0	0	0.210421	0	0	0	0	0	0	0	0	0	0	0	0	0.0978001	0	0	0	0	NA	NA	NA	0	0	0.74434	0.222865	0.814345	0.323039	none	none	none
ENSMUSG00000000732	Icosl	1033	0	0.524147	0	0.905384	2.79858	2.14368	0	0.337561	0	30.1382	35.9743	38.9624	82.2414	98.5351	81.6794	0.232312	1.56033	0.153832	5.17093	6.46737	3.87885	7.84384	4.39236	1.93357	3.70487	0.567997	2.63575	3.83047	3.36516	none	none	none
ENSMUSG00000000738	Spg7	2346	12.9014	13.6938	11.9041	18.3385	16.0197	11.6416	19.9423	14.4177	15.0908	8.46239	9.28225	9.7004	8.46211	9.45071	8.32533	3.79005	4.02974	4.12793	3.34317	3.28482	11.3709	11.0054	11.5166	4.12763	4.36224	1.83786	1.51772	1.19073	0.920119	none	none	none
ENSMUSG00000000739	Sult5a1	876	0	0.206029	0	2.1353	1.83342	3.37051	0	0	0	0	0.270202	0.429396	0	0	0	0.0958249	1.78509	0	0.302406	0	2.22669	8.43615	0	0.0840643	0.0565835	0.0235408	0.0182943	0	0	none	none	none
ENSMUSG00000000740	Rpl13	636	2.97431	1.98643	1.64665	10.2938	3.03033	1.1606	0	4.93444	12.37	1.41887	1.86083	1.7743	1.83612	2.77301	1.22838	1.67918	2.54306	2.75876	1.42474	1.55868	NA	NA	NA	3.02857	2.5509	7.5941	7.50884	8.05477	6.84453	none	none	none
ENSMUSG00000000743	Chmp1a	591	82.1534	73.5972	59.0675	97.3242	87.5053	63.6975	43.1791	48.3815	44.69	63.3664	65.6825	64.6012	52.856	54.141	49.3513	6.18202	6.38961	5.53658	6.03452	5.73108	12.731	13.024	12.2226	4.89627	4.91329	3.75365	4.25668	2.60765	2.71777	none	none	none
ENSMUSG00000000751	Rpa1	1935	42.58	33.6712	34.9991	41.5672	47.3107	51.1168	52.2026	50.9986	42.1102	60.976	58.471	64.3442	34.5503	27.4733	25.436	5.25109	5.57486	5.62752	5.96032	4.91424	13.2077	13.8349	13.0865	4.34056	5.43296	1.29583	1.45443	1.25163	0.443807	none	none	none
ENSMUSG00000000753	Serpinf1	1254	0.335223	0.143924	0.835141	2.23747	2.30537	1.76589	29.677	35.5931	31.369	22.8478	21.8955	25.6467	99.4096	93.2245	96.7735	0.52416	1.63362	5.05368	4.61255	6.60687	5.14636	6.9647	10.1408	2.73552	3.03328	1.47845	3.10338	3.64645	3.16513	Cx3cr1	none	none
ENSMUSG00000000759	Tubgcp3	2718	10.285	10.2259	9.6327	10.6671	8.50901	10.863	12.9096	10.52	9.0971	8.71522	7.22807	6.43525	8.37805	6.95219	6.70682	3.4657	3.46114	3.56587	3.08057	3.06103	11.5831	12.0509	11.7678	3.14078	2.78101	0.791896	0.807791	0.643275	1.27336	none	none	none
ENSMUSG00000000766	Oprm1	1371	5.05915	5.26568	5.09247	0.341088	1.17146	0	4.65332	6.61285	5.73839	7.0757	4.31614	1.78336	0.851766	0.735076	1.89946	2.61803	0.58898	2.7373	2.43075	1.11243	6.41169	4.01812	4.9436	1.04264	0.0379679	0.0019136	0	0	0	none	none	none
ENSMUSG00000000776	Polr3d	1197	11.5891	11.7607	13.4153	12.8921	11.5391	9.86656	23.0956	16.6048	13.1451	11.3083	8.10743	9.58446	5.3657	6.10399	5.22138	3.72847	3.63605	4.21841	3.41504	2.71451	11.1524	11.0983	11.4938	3.15381	3.44361	1.98783	1.59631	2.00673	2.42217	none	none	none
ENSMUSG00000000782	Tcf7	1260	0.166813	0.143239	0.831164	0	0	0	0	0.553493	0	0.716189	1.50284	0.895597	0	0	0.413359	0.465092	0	0.244275	1.0273	0.18623	NA	NA	NA	0.847997	0.565597	0.0799454	0.043955	0	0	none	none	none
ENSMUSG00000000787	Ddx3x	1989	174.044	158.431	192.71	197.961	180.875	193.349	153.425	105.189	108.492	59.3206	52.8374	77.2537	186.262	167.712	156.983	7.45994	7.58292	6.94683	6.00309	7.42054	15.132	14.9965	15.364	5.41278	5.0063	3.49772	2.36253	4.66145	4.8703	none	none	none
ENSMUSG00000000791	Il12rb1	2217	0	0.0814079	0	0	0	0	0	0	0.253474	0.305277	0.106765	0	0.131684	0.113643	0	0.0386271	0	0.117019	0.185673	0.113401	NA	NA	NA	0.286881	0.415037	0.163217	0.138729	0.193115	0	none	none	none
ENSMUSG00000000792	Slc5a5	1857	3.056	4.85948	3.00777	2.26639	2.0757	3.97492	2.29033	0.751105	0.90784	1.45783	1.14716	0.607675	1.2577	0.678372	0.56094	2.21446	1.91546	1.2119	1.05025	0.873684	9.74547	10.0006	9.27344	3.14405	0.95109	1.2923	0.58865	0.0878345	0.0975214	none	none	none
ENSMUSG00000000794	Kcnn3	2199	3.44095	3.69334	4.12747	2.55187	3.06754	1.34269	0.967062	1.26858	0.766648	21.4417	25.9409	26.9412	0.79657	2.06232	0.828974	2.24912	1.73149	1.00055	4.68788	1.15658	8.10854	7.86151	5.32811	1.80735	2.56071	0.332986	0.150062	0	0.047034	GFAP	AS	none
ENSMUSG00000000804	Usp32	4815	27.2389	28.3747	27.9126	28.0676	28.5524	30.2002	29.3701	25.4193	23.225	20.0533	17.7953	18.7099	8.9129	9.20929	9.89744	4.8501	4.90401	4.75514	4.31127	3.37015	13.2662	13.2542	13.2176	4.61706	3.90432	0.634055	0.226143	0.219688	0.268922	none	none	none
ENSMUSG00000000805	Car4	918	27.0172	27.721	30.4217	35.1487	24.8434	38.5957	91.5027	66.4734	85.0887	4.91503	4.12544	1.639	5.40635	5.48905	5.1062	4.87709	5.08162	6.35793	2.18898	2.66309	11.2164	11.105	8.56034	4.90304	4.31615	2.80439	1.85407	0.3494	0.0712535	none	EC	Int_Npy
ENSMUSG00000000811	Txnrd3	1848	1.59231	2.14859	2.26681	1.26524	1.91199	1.59771	6.90445	5.09465	5.16948	5.12726	6.0199	5.39394	3.94944	2.3177	3.66387	1.5862	1.37387	2.74907	2.70348	2.1078	8.55002	7.18211	9.18216	1.43296	2.39506	0.359899	0.406694	0.305575	0.200421	none	none	none
ENSMUSG00000000817	Fasl	840	0	0	0	0	0	0	0	0	0	0	0	0	0	0	0	0	0	0	0	0	NA	NA	NA	0.0565835	0	0	0	0.110168	0	none	none	none
ENSMUSG00000000823	Zfp512b	2640	14.4104	11.4168	10.0495	12.5764	13.1406	10.0656	5.63863	3.30209	5.32152	4.44363	3.31735	4.06072	2.54344	2.57673	2.86063	3.69587	3.69238	2.52459	2.30468	1.87195	NA	NA	NA	2.5509	2.03092	1.29993	0.596651	0.755691	1.16333	none	none	none
ENSMUSG00000000826	Dnajc5	597	393.26	354.009	366.046	424.549	354.574	359.798	607.337	539.113	633.491	149.644	151.455	128.849	198.052	179.782	224.647	8.53957	8.57228	9.21508	7.17309	7.65697	13.4953	13.5328	13.701	6.57471	5.63421	3.39833	2.70128	1.95703	2.44302	none	none	none
ENSMUSG00000000827	Tpd52l2	690	67.6246	66.438	67.7941	73.8722	64.243	74.884	120.197	122.298	123.792	85.3355	89.1903	88.8588	121.008	127.799	127.566	6.09351	6.16992	6.94364	6.4724	6.98251	11.8808	12.0504	12.1519	3.70266	4.26704	1.79253	2.11177	2.53995	2.20124	none	none	none
ENSMUSG00000000838	Fmr1	1896	68.0661	66.6334	78.0663	58.2072	59.296	72.0233	23.5538	32.001	33.1955	42.7164	37.4521	34.0242	36.1849	29.5002	32.0026	6.16836	6.00395	4.93468	5.28778	5.06878	12.3474	12.0245	11.5514	3.76553	3.52356	0.466867	0.18629	0.57265	0.92701	none	none	none
ENSMUSG00000000861	Bcl11a	2508	68.134	68.9398	63.8883	93.6008	90.0375	89.1774	19.502	23.636	23.7508	9.98467	10.759	4.94935	1.86247	2.71235	2.90736	6.08719	6.5226	4.54203	3.25766	1.80491	13.0362	13.6123	11.8781	4.56925	3.23266	1.08502	0.442261	0.136322	0.0324142	none	N	none
ENSMUSG00000000869	Il4	423	0	0	0	0	0	0	0	0	0	0	0	0	0	0	0	0	0	0	0	0	NA	NA	NA	0.0840643	0	0.085369	0	0.322516	0	none	none	none
ENSMUSG00000000876	Pxmp4	639	12.4992	14.4046	8.74088	5.85454	5.52952	5.77576	3.32796	8.18546	6.15598	26.8319	27.411	54.4506	17.3612	12.6171	15.894	3.68724	2.74845	2.78446	5.21844	4.02598	10.808	10.3379	9.90986	3.02148	4.39917	1.05053	1.27145	1.16755	1.12185	none	none	Olig
ENSMUSG00000000881	Dlg3	2550	98.7456	98.6631	88.8466	132.954	105.56	116.655	27.9373	24.8877	22.4781	13.8899	12.9951	12.6121	10.1894	8.10184	7.35293	6.59124	6.89954	4.70603	3.82433	3.25521	15.8581	16.0388	15.091	5.43162	4.96347	2.20965	1.45758	0.692061	0.81346	none	none	none
ENSMUSG00000000884	Gnb1l	1074	0.978513	1.17632	1.95022	0.870821	1.19633	1.37457	0	1.62337	1.04647	0.840222	2.42427	2.1014	2.17462	1.40753	1.93979	1.24388	1.10248	0.918346	1.47956	1.50622	8.71962	8.58696	9.13072	1.05658	1.1375	0.125473	0.132685	0.118148	0.110028	none	none	none
ENSMUSG00000000889	Dbh	1869	0.337375	0	0.560335	0	0.171865	0	0	0.186571	0.601341	1.68989	2.53288	0.704402	0	0.674016	0.696673	0.377664	0.0803687	0.33644	1.40184	0.542898	NA	NA	NA	0.111031	0	0.200589	0.0869558	0	0	none	none	none
ENSMUSG00000000901	Mmp11	1479	0.142113	0.610146	0.23603	0	0.217184	0	0.718921	0.235768	0.759909	2.5931	1.92047	2.54328	1.18435	1.3628	0.704304	0.410808	0.100836	0.652172	1.74514	1.05923	5.59461	5.25008	9.55037	0.641546	1.14622	0.0994042	0.370255	0.593583	0.516028	none	none	none
ENSMUSG00000000902	Smarcb1	1158	121.428	121.568	110.032	118.725	133.701	103.263	108.349	78.5932	69.3949	91.3698	91.7764	93.5505	62.2711	50.2589	47.4506	6.89088	6.90163	6.43372	6.54276	5.76359	13.3072	13.5434	13.2143	5.09761	6.03474	1.93361	2.2813	2.0761	1.57764	none	none	none
ENSMUSG00000000903	Vpreb3	393	0	0	0	0	0	0	0	0	0	0	2.40913	0.478563	0	0	0	0	0	0	0.972741	0	NA	NA	NA	0.263034	0.263034	0	0	0	0	none	none	none
ENSMUSG00000000915	Hip1r	3207	22.8732	17.2771	20.5731	12.3943	8.51365	4.37315	19.5615	14.135	13.142	15.5465	16.8279	18.5319	3.27719	3.06391	2.35487	4.40879	3.23681	4.05423	4.16742	1.96298	NA	NA	NA	4.0197	4.50674	2.00265	0.859019	0.428476	0.13079	none	none	none
ENSMUSG00000000916	Nsun5	1398	1.80416	2.19469	2.49706	3.0105	0.689302	1.056	7.60576	1.49657	1.20591	1.61373	1.35449	1.61438	2.71478	3.24396	2.23533	1.66234	1.37031	2.14928	1.33773	1.8997	9.31755	9.32128	10.2621	2.99277	2.81694	1.1339	1.77165	2.21923	2.44902	none	none	none
ENSMUSG00000000934	Top1mt	1782	2.59487	2.73456	1.76308	1.83693	3.06434	2.07111	3.58008	5.28334	3.78419	3.16498	3.32067	2.63854	4.09572	3.676	3.50729	1.75025	1.73298	2.38291	2.01485	2.25086	10.7977	11.5917	11.6726	2.57531	2.2967	0.774062	0.743033	0.734666	0.319173	none	none	none
ENSMUSG00000000938	Hoxa10	1251	0	0	0	0	0	0	0	0	0	0	0	0	0	0	0	0	0	0	0	0	NA	NA	NA	0	0	0	0	0	0	none	none	none
ENSMUSG00000000942	Hoxa4	858	0	0	0	0	0	0	0	0.812822	1.96487	0.525873	0.551742	0	0	0.293645	0	0	0	0.945531	0.442763	0.134723	NA	NA	NA	0	0	1.63106	0.596949	0	0	none	none	none
ENSMUSG00000000948	Gm38393	216	0.973077	0.835561	0	0	2.97421	0	0	0	0	0	1.09582	0	6.75794	3.49927	7.23378	0.680666	0.993786	0	0.44919	2.77196	NA	NA	NA	NA	NA	NA	NA	NA	NA	none	none	none
ENSMUSG00000000957	Mmp14	1749	0.841219	0.515955	0.798374	0.534741	0	0.422037	1.21588	3.98743	6.10469	67.9766	61.0352	61.1864	23.3688	22.7603	30.8211	0.781163	0.399363	2.25379	6.00897	4.73607	4.26987	5.58553	6.63175	2.36737	4.80976	1.54281	1.53307	3.17322	2.62381	none	none	none
ENSMUSG00000000958	Slc7a7	1533	0.137107	0.117731	0	0	0	0.963003	0	0	0	1.03014	0.617606	0.736107	52.3707	50.7839	46.7152	0.117623	0.401632	0	0.843675	5.6712	NA	NA	NA	1.1375	1.19745	0.145666	2.26265	2.71868	2.47622	Cx3cr1	none	none
ENSMUSG00000000959	Oxa1l	1302	27.1206	26.7534	23.5943	22.9865	25.9044	20.9764	47.366	37.2269	34.097	32.0552	31.8142	37.124	29.5979	24.9625	27.8017	4.74539	4.60224	5.3421	5.11539	4.83056	12.072	12.0723	12.9365	4.24641	4.62644	3.10839	3.31953	3.96536	3.25157	none	none	none
ENSMUSG00000000976	Heatr6	3555	2.95618	2.58918	2.25852	5.26167	2.62032	3.11452	6.28101	5.68907	5.05837	3.04607	3.66198	4.81431	7.96581	6.02406	7.2521	1.84852	2.22203	2.73902	2.27524	3.01447	9.54948	10.04	9.73383	1.94111	1.89789	0.665198	0.803711	1.1307	1.14752	none	none	none
ENSMUSG00000000982	Ccl3	279	0	0	0	0	0	0	7.62211	0	0	0	0.848378	0.674106	46.0412	51.4731	51.3365	0	0	1.82404	0.592153	5.66155	NA	NA	NA	0.400538	0.189034	1.78728	3.16166	5.49821	6.30524	Cx3cr1	MG	Micro_1
ENSMUSG00000000983	Wfdc18	225	8.40738	12.8342	10.8605	0	4.28287	0	0	0	0	0	2.10398	0.835891	0	0	0	3.54853	1.27954	0	0.985468	0	7.97519	5.21334	4.55663	1.37851	1.12433	1.25658	0.378988	0	0.230069	none	none	none
ENSMUSG00000001014	Icam4	789	0.266394	1.37248	0	0.592688	0.814233	0.935541	0	0	0	0	0	0	0.370016	0	0	0.628812	0.832542	0	0	0.167793	NA	NA	NA	1.23879	0.32577	0.857135	0.820574	0.541942	0	none	none	none
ENSMUSG00000001016	Ilf2	1173	130.089	138.63	129.16	106.443	115.561	135.295	165.883	99.8836	94.8565	52.5053	42.7791	45.6961	40.3195	31.7888	33.7453	7.06206	6.90808	6.92134	5.58477	5.18128	12.4337	12.5608	12.7963	5.33056	5.51054	3.21659	2.58088	1.98447	2.55711	none	none	none
ENSMUSG00000001017	Chtop	750	156.097	152.326	148.479	137.795	122.49	127.945	151.695	155.753	137.866	106.483	119.927	97.2977	84.8581	71.889	69.7916	7.26022	7.02691	7.2234	6.76689	6.25763	12.6751	12.7272	12.5238	5.0798	5.14377	3.3278	2.82517	2.7764	3.83435	none	none	none
ENSMUSG00000001018	Snapin	411	29.1497	24.152	35.6733	34.1337	34.388	16.1637	80.1991	50.9052	38.2839	128.444	123.82	134.536	105.128	126.893	127.99	4.93821	4.8693	5.84455	7.02162	6.91891	12.4366	12.3933	13.0563	4.79181	5.23445	3.78627	4.33163	3.62226	4.24458	none	none	none
ENSMUSG00000001020	S100a4	306	0	0	0	0	0	0	0	0	0	0	0.773521	0	0	0	0	0	0	0	0.330949	0	5.44165	6.23295	6.23534	1.51602	3.5042	1.62377	2.59687	2.20192	0.926644	none	none	none
ENSMUSG00000001021	S100a3	306	0.686878	0.589808	0	0	0	0	0	0	0	0	0	0.614626	0.954062	0	0	0.511531	0	0	0.268884	0.398373	NA	NA	NA	0.485427	0.776806	0.85458	0.454382	0.324281	0	none	none	none
ENSMUSG00000001023	S100a5	282	0	0.640004	0	0	0	0	0	0	0	0	0	0	0	0	0	0.278978	0	0	0	0	NA	NA	NA	0	0.00958605	2.85	1.70616	0.251145	0.715073	none	none	none
ENSMUSG00000001025	S100a6	270	48.2646	65.508	71.1107	3.46393	3.56906	8.20158	3.93809	2.58297	16.6505	316.675	355.046	269.575	8.65016	7.46511	8.68054	5.96873	2.60364	3.12496	8.29813	3.21183	10.6463	7.72247	7.94013	4.25399	6.01212	1.90072	1.29352	0.498637	0.229659	GFAP	none	none
ENSMUSG00000001027	Scn4a	5526	0	0	0	0	0	0	0	0	0.101693	0	0	0.0340346	0	0	0	0	0	0.0480932	0.0162751	0	NA	NA	NA	0	0	0	0.0107672	0	0	none	none	none
ENSMUSG00000001029	Icam2	834	0.25202	0	0	0	0	0	0	0.836213	0.673804	0	0.851429	0.22551	2.45036	3.62514	5.93274	0.116374	0	0.58817	0.442524	2.32272	NA	NA	NA	0.9855	0.263034	0.986922	1.35292	1.37217	1.21661	Cx3cr1	EC	none
ENSMUSG00000001034	Mapk7	2421	1.04181	1.78916	0.72096	0.965781	2.25554	0.304891	0	0.720158	0	1.86369	2.24867	1.32065	3.85881	4.26677	3.7648	1.12696	1.12128	0.310402	1.49109	2.31135	10.822	10.8595	9.46507	2.57046	2.53107	1.92002	2.12496	2.42235	2.35171	none	none	none
ENSMUSG00000001036	Epn2	1923	55.7432	57.9079	47.0172	59.5786	67.6506	64.4867	33.7287	19.4025	21.3326	27.3347	27.5716	32.4706	12.1453	9.95736	13.5422	5.76967	6.02026	4.69049	4.91292	3.68724	13.3611	13.9101	11.2009	5.01614	5.28762	1.59912	0.945329	0.754977	0.70874	none	none	none
ENSMUSG00000001039	B9d1	615	17.7717	13.4994	15.3259	22.8113	11.4906	16.8032	25.9338	7.37091	4.56872	23.477	28.8655	30.5814	3.32293	2.04835	5.92818	4.04722	4.17273	3.76813	4.84003	2.25293	9.97868	10.2875	9.8021	3.04963	4.12488	3.70724	2.65107	0.801951	0.283093	none	none	none
ENSMUSG00000001052	Sec24b	3756	27.9239	24.7945	17.1013	20.2939	21.038	22.6002	14.7207	13.183	12.1188	4.8051	5.23053	6.35931	16.9445	13.4828	12.48	4.60129	4.47966	3.84206	2.69265	3.93569	12.5482	12.3534	12.3723	3.72028	3.3978	0.376417	0.392426	0.481601	0.755704	none	none	none
ENSMUSG00000001053	N4bp3	1614	2.86497	3.91378	2.16288	3.76654	3.78134	2.74402	4.61152	4.1049	1.74087	3.77397	2.49309	4.31152	0.904408	0.468304	0.322697	1.99297	2.14751	2.16535	2.1783	0.646288	9.80524	10.4901	12.2597	2.848	3.04148	2.22914	1.41426	0.356399	0.0755097	none	none	none
ENSMUSG00000001054	Rmnd5b	1182	40.3654	44.7386	42.5286	42.7277	45.9267	46.8364	18.8908	14.4554	10.9348	25.003	22.8287	31.0277	16.3014	14.9207	13.8801	5.44441	5.52868	3.97823	4.77011	4.00307	12.4911	12.857	11.2975	4.47897	4.50462	2.00964	1.99103	1.70659	1.69883	none	none	none
ENSMUSG00000001056	Nhp2	462	59.5978	61.3324	47.603	70.8532	49.3642	62.3107	59.8385	52.0787	26.7597	29.2987	26.1289	30.1246	39.8104	34.9018	33.2566	5.83738	5.95053	5.5615	4.88349	5.20905	12.7814	12.8858	12.1993	4.62176	4.33104	4.92233	5.4875	4.32379	3.44108	none	none	none
ENSMUSG00000001062	Vps9d1	1953	10.3317	8.50193	8.22227	6.46495	5.92101	7.93701	8.71098	10.3557	8.34441	2.54132	2.78753	3.08163	4.33504	5.80524	5.60035	3.32461	2.95872	3.34156	1.92732	2.64314	12.1374	12.2611	12.5487	3.70044	2.78101	2.74979	2.57011	2.37463	3.15136	none	none	none
ENSMUSG00000001065	Zfp276	1845	2.73411	2.15208	2.83812	2.02767	0.870501	1.60031	0	1.70098	1.82749	1.58959	1.5395	2.1407	6.17115	3.96015	4.23441	1.83785	1.32164	1.12178	1.46289	2.53321	8.41293	8.67395	8.7102	2.01436	1.72828	0.856941	0.666977	1.66248	2.0695	none	none	none
ENSMUSG00000001076	C1ql4	717	0	0	0.486874	0	0	0	0	0.486333	0	0	0.330122	0.262309	0	0	0	0.216972	0	0.216748	0.259998	0	NA	NA	NA	0.0285692	0.00958605	0	0	0	0	none	none	none
ENSMUSG00000001082	Mfsd10	1371	6.43892	6.31882	5.09247	7.84501	6.0916	4.30717	2.32666	3.81511	7.78782	3.45557	5.86996	5.76161	20.0165	21.3172	18.6147	2.79703	2.82401	2.49651	2.59193	4.39114	9.10372	8.62568	8.60542	2.03562	2.05427	2.43144	4.02382	5.39815	4.13983	Cx3cr1	none	none
ENSMUSG00000001089	Luzp1	3207	48.7613	49.524	52.9022	57.4514	57.4922	54.5493	75.2621	82.8531	107.94	10.9036	12.8423	8.73815	12.8357	12.0985	10.7999	5.68358	5.84543	6.48679	3.56414	3.69057	14.8046	15.2096	15.9289	4.2854	3.25902	1.1212	0.759616	0.325715	0.317466	none	none	none
ENSMUSG00000001095	Slc13a2	1761	0	0	0	0	0	0	0	0	0	0	0	0	0	0.143071	0	0	0	0	0	0.0672122	NA	NA	NA	0	0	0	0.0131841	0.0351332	0	none	none	none
ENSMUSG00000001098	Kctd10	951	50.6123	56.9341	53.226	33.9291	47.9627	45.7943	58.1396	39.2334	35.4544	29.4157	27.3782	25.5118	83.5	66.4971	66.2679	5.77059	5.445	5.50067	4.82961	6.19157	11.5489	11.7353	10.6911	4.35473	4.20633	2.8802	3.09634	1.16108	1.4847	none	none	none
ENSMUSG00000001100	Poldip2	1107	37.9737	39.4548	34.3728	40.9758	40.9136	33.3397	40.3414	45.6744	35.0269	41.5739	42.5499	42.9838	26.6362	24.3526	18.8196	5.25803	5.30048	5.36973	5.4386	4.60107	13.7452	14.187	15.0491	5.58256	5.75382	3.70204	3.55995	2.34217	2.64367	none	none	none
ENSMUSG00000001103	Sebox	573	2.20089	2.20483	2.43692	4.08055	2.24234	1.28821	1.85564	3.04276	6.86504	0	0	0	0	0	0	1.71408	1.82254	2.299	0	0	8.25045	11.0286	4.70421	1.83996	0.8101	1.10723	0.171474	0	0	none	none	none
ENSMUSG00000001105	Ift20	399	80.0703	108.108	118.988	110.169	81.3101	86.949	37.3082	77.7804	77.4622	45.233	52.7972	48.0794	84.1439	70.7221	70.4886	6.69193	6.55166	6.02644	5.63527	6.25017	12.2874	12.4656	12.836	4.88947	3.97514	4.63625	4.89169	3.39373	3.43543	none	none	none
ENSMUSG00000001119	Col6a1	3078	3.68745	3.69406	3.62926	2.58276	0.521792	0.479624	0	0.679728	0.547712	1.246	1.84559	0.244413	0.189696	0.57298	0.507634	2.2235	1.13404	0.494822	1.07861	0.509378	9.89171	6.64847	9.48882	1.12433	0.333424	0.223553	0	0.0425562	0	none	none	ExcL5_1
ENSMUSG00000001120	Pcbp3	1116	65.7298	68.0848	57.5559	50.7019	48.6428	32.4095	48.591	44.9936	38.2692	20.6193	19.5127	14.4933	8.37112	4.51519	3.96691	6.0177	5.48922	5.49029	4.26367	2.72634	13.3514	13.133	12.8432	4.66562	3.94922	0.903006	0.483381	0.0397124	0.0139356	none	none	none
ENSMUSG00000001123	Lgals9	1062	0.593742	0.339889	0.657418	0	0	0	0	0	1.05829	0.637287	1.56015	0.885478	338.401	338.065	332.999	0.613861	0	0.43591	1.0198	8.39869	5.38876	6.59675	6.35948	1.848	1.3599	0.659154	3.43453	4.57889	3.84036	Cx3cr1	none	none
ENSMUSG00000001127	Araf	1815	58.5969	59.0666	49.0456	61.0626	44.9524	54.9031	115.995	96.0608	81.7386	45.99	50.2085	44.7651	16.2459	19.8504	19.0828	5.82196	5.77187	6.62836	5.5846	4.27747	13.9721	14.3986	15.0078	6.31143	5.34767	6.38377	4.04082	3.28788	3.25498	none	none	none
ENSMUSG00000001128	Cfp	1395	0	0	0	0.335219	0	0	0.762211	0	0.805667	0	0	0.134821	23.6484	19.8668	13.0675	0	0.152819	0.606562	0.0634206	4.31186	4.74083	5.20533	6.66051	1.96347	0.49228	1.0974	3.0384	0.813843	0.930735	Cx3cr1	none	none
ENSMUSG00000001131	Timp1	618	0.340105	0.584082	0.564869	0	0	0	0	0	0	1.46019	2.68104	3.34762	0	0.407682	0	0.581449	0	0	1.80582	0.183828	NA	NA	NA	0.695994	0.842644	0.666468	0.246136	0.155598	0.0834833	GFAP	none	none
ENSMUSG00000001134	Uxt	474	3.10399	3.0461	0.736475	1.97313	0.677669	1.55726	0	1.47131	3.55666	3.33164	6.99106	7.14211	4.31139	8.50455	10.988	1.72051	1.26465	1.42007	2.77011	3.15941	9.12183	9.35029	9.24033	1.1635	1.62916	0.539916	0.26047	0.296401	0.262794	none	none	none
ENSMUSG00000001138	Cnnm3	2142	7.16315	8.17305	7.17083	5.67619	6.89817	7.23669	13.4027	8.79077	12.8551	19.6952	21.1061	19.7558	8.85914	9.52742	9.36137	3.08786	2.9267	3.66481	4.40502	3.35746	9.70396	9.21745	9.42381	2.9486	3.59455	1.64361	1.40939	1.9585	1.42941	none	none	none
ENSMUSG00000001143	Lman2l	1077	21.6625	23.6285	20.7444	35.6042	26.5442	21.2464	58.2486	41.1188	43.3074	22.6228	26.373	28.6392	35.2392	43.5118	35.0607	4.5243	4.84791	5.60165	4.74837	5.28308	10.5979	10.8692	9.6196	4.12598	3.91839	0.88081	1.31709	1.7	1.30954	none	none	none
ENSMUSG00000001150	Mcm3ap	5916	10.4098	10.342	8.85114	6.87693	9.55609	8.11008	5.9311	4.36171	3.13462	2.63123	2.04049	2.73402	4.54002	4.38651	3.91769	3.44196	3.19866	2.45307	1.79435	2.40092	12.8942	12.6845	12.2192	2.96717	2.65535	1.07528	0.90421	0.440683	0.637592	none	none	none
ENSMUSG00000001151	Pcnt	8751	3.69883	2.92862	3.55033	3.63375	4.2212	4.21747	4.86017	3.10806	3.46766	1.77881	1.78517	1.78383	3.0025	2.96544	4.10667	2.13507	2.32888	2.26663	1.47643	2.12373	10.8826	11.2704	11.6438	2.15704	1.75417	0.402621	0.348099	0.540361	0.460456	none	none	none
ENSMUSG00000001155	Ftcd	1626	0.129265	0.221994	0	0	0	0	0	0	0	0	0	0	0	0	0	0.159741	0	0	0	0	NA	NA	NA	0	0	0.0289234	0	0	0	none	none	none
ENSMUSG00000001156	Mxd1	684	29.1923	25.3307	18.8835	30.0815	13.6188	32.3746	29.5357	24.4702	17.2529	17.4807	25.2616	17.5977	17.9263	20.9956	20.1785	4.67066	4.72019	4.62953	4.40008	4.37157	12.6531	12.295	11.2087	2.85599	2.46815	0.867544	0.76847	0.74095	0.791886	none	none	none
ENSMUSG00000001157	Gmcl1	1575	13.2116	15.126	16.18	12.1733	13.0525	13.5912	3.37551	8.85589	7.8495	6.73218	7.66449	6.4483	8.89731	7.51843	6.61375	3.98543	3.80105	2.94366	2.99065	3.11711	11.658	11.4704	11.2606	3.17632	2.48714	0.306841	0.0765697	0.185149	0.309601	none	none	none
ENSMUSG00000001158	Snrnp27	576	72.251	70.8138	80.6056	77.9385	51.8628	61.5118	77.5312	78.0944	98.5369	58.7499	64.5165	53.2227	69.4378	75.6717	81.3801	6.23949	6.01728	6.42157	5.90279	6.25732	12.6443	13.111	12.5549	4.82273	4.92442	2.84116	2.6215	2.49045	2.15633	none	none	none
ENSMUSG00000001166	Oas1c	1089	0.772028	0.994387	1.28224	0.429413	0	0	0	0.320203	0.516026	0	0	0	0.80425	1.15678	0	1.01165	0.192999	0.354726	0	0.725678	6.6028	6.26026	6.02064	0.565597	0.163499	0.181689	0.592421	0.416285	0.601132	none	none	none
ENSMUSG00000001168	Oas1h	1110	0	0	0	0	0	0	0	0	0	0	0	0	0	0	0	0	0	0	0	0	NA	NA	NA	0	0	0	0	0	0	none	none	none
ENSMUSG00000001173	Ocrl	2703	24.1833	32.2502	27.6378	27.1617	34.3437	32.4968	20.4553	24.1239	17.8794	12.3525	11.8217	11.0633	7.66849	7.17719	5.58792	4.85916	5.01498	4.44755	3.67195	2.96554	12.6944	12.8041	13.5026	3.94486	3.08972	0.694317	0.234193	0.172789	0.295712	none	none	none
ENSMUSG00000001175	Calm1	594	7270.48	7928.11	10036.6	8400.04	9476.92	9297.61	7586.2	9532.91	11386.6	3293.22	2969.48	2137.54	1321.61	1204.17	1083.75	13.0384	13.1452	13.2142	11.4518	10.2338	19.8671	19.7577	18.9884	9.51084	8.44623	8.91246	7.11382	6.9362	5.80573	none	none	none
ENSMUSG00000001211	Agpat3	1131	48.8758	53.4582	50.0021	50.8564	47.9976	43.7272	103.414	86.9439	73.039	248.738	263.485	321.774	58.8532	57.6962	53.1885	5.69429	5.60072	6.47247	8.12412	5.84748	12.5719	12.0404	13.0699	6.08704	7.25707	1.33651	1.53186	0.955009	0.851451	GFAP	none	none
ENSMUSG00000001225	Slc26a3	2274	0.184859	0	0	0.411285	0	0.649201	0	0	0	0.59525	0.312266	0.330828	0	0	0.114519	0.086267	0.43669	0	0.498538	0.0540469	NA	NA	NA	0.0285692	0.0658021	0	0	0	0	none	none	none
ENSMUSG00000001227	Sema6b	2661	33.0166	29.7072	25.3191	34.6198	32.713	21.3592	23.1757	18.4768	19.4287	7.12152	6.31549	5.93699	1.75539	3.21917	2.25087	4.92351	4.93376	4.41687	2.89879	1.76913	13.6525	13.1795	13.2694	4.77926	3.69004	3.09515	1.55019	0.743911	0.418284	none	none	none
ENSMUSG00000001228	Uhrf1	2349	0	0	0	0.199077	0	0	0	0	0	0.192081	0.100765	0.240199	2.23711	1.28709	1.21949	0	0.0926931	0	0.23595	1.36806	NA	NA	NA	0.137504	0.62293	0.0419398	0.149913	0.0848925	0.159548	Cx3cr1	none	none
ENSMUSG00000001229	Dpp9	2589	39.6988	38.7592	34.6527	29.9833	30.3969	23.6639	18.8919	17.2397	12.155	5.40254	6.034	6.61061	12.5167	10.8992	11.4668	5.2744	4.85871	4.09555	2.81059	3.6585	13.9592	14.0856	13.6739	4.37016	3.61667	3.4761	2.54764	2.50085	2.04504	none	none	none
ENSMUSG00000001240	Ramp2	570	7.00615	6.96594	7.96168	41.8407	30.4309	47.9145	5.59623	4.28229	0	58.181	51.9073	73.9104	8.19489	4.86214	5.93932	3.05507	5.35973	2.10193	5.96192	2.87423	NA	NA	NA	3.45943	4.6151	1.52436	0.992528	0.844234	0.249812	none	none	none
ENSMUSG00000001247	Lsr	1785	0.471002	0	0.586704	0	0	0	0	0.195351	0	0.252773	0.795621	0.421458	0.49066	0.564588	0.291783	0.435702	0	0.0910117	0.575264	0.535068	4.66444	2.40916	6.18777	1.33342	0.519374	0.799544	0.44305	0.15193	0.168311	none	EC	none
ENSMUSG00000001248	Gramd1a	2169	26.5517	29.4561	25.4293	26.7341	34.802	24.5026	29.9033	13.9866	16.0632	10.6091	10.8036	11.6192	12.6522	15.7975	17.289	4.81484	4.8914	4.39124	3.58624	4.02204	11.6449	11.7327	11.2805	4.36177	3.71516	3.09256	2.65892	3.35887	4.07418	none	none	none
ENSMUSG00000001249	Hpn	1338	0.314177	0	0	0	0	0	0	0	0	0.16861	0.353808	0.140565	2.18193	0.941507	0.973155	0.143688	0	0	0.288056	1.24216	NA	NA	NA	0.31034	0.146221	0.140045	0.330346	0.661583	0.930898	Cx3cr1	none	none
ENSMUSG00000001260	Gabrg1	1398	15.4857	16.5247	15.7315	16.725	12.1777	22.1759	9.88748	10.476	14.4709	406.015	353.692	340.231	6.05604	7.38901	5.58833	4.08014	4.17202	3.65666	8.52217	2.87666	9.07718	7.84497	7.13692	2.68257	4.55623	0.164843	0.012946	0.00972753	0	GFAP	AS	none
ENSMUSG00000001270	Ckb	1146	595.707	507.426	485.252	307.673	239.37	208.045	1724.82	1332.73	807.623	1314.82	1415.02	2207.51	436.386	413.537	435.618	9.0511	7.98126	10.3325	10.6854	8.74656	17.1647	16.6665	18.521	9.45557	11.2493	10.774	9.63249	8.88059	7.67659	none	none	none
ENSMUSG00000001280	Sp1	2346	3.49412	2.30794	3.72004	1.59465	2.87533	3.46102	4.98556	7.58045	8.14424	25.4833	27.2414	27.578	59.2348	58.2078	55.5022	2.06144	1.86539	2.98248	4.79533	5.87402	10.6778	10.8511	11.1019	2.37295	2.774	0.318311	0.398189	1.50007	2.0487	none	none	none
ENSMUSG00000001281	Itgb7	2421	0	0.0745482	0.144192	0.193156	0.132679	0	1.31758	1.15225	1.85693	0.0931845	0	0.15537	0	0.208135	0.537828	0.101534	0.148754	1.28821	0.114835	0.320374	NA	NA	NA	0.400538	0.532733	0.109596	0.204383	0.292446	0.0484077	none	none	none
ENSMUSG00000001285	Myg1	1143	20.4116	19.7377	19.2411	20.4563	21.0771	24.5402	36.2801	21.6603	21.1408	13.6189	11.3896	16.1255	20.6889	15.6503	13.4423	4.37829	4.5251	4.77402	3.87886	4.137	11.5579	12.1725	11.9263	4.03386	4.46597	3.53808	3.44339	3.59024	3.52922	none	none	none
ENSMUSG00000001288	Rarg	1377	1.98431	1.31068	2.02811	0.339601	0.233272	0	0	1.51939	1.2243	2.62135	2.7503	2.86825	0.636041	1.64671	2.26942	1.47216	0.252122	0.937016	1.90559	1.33193	8.56798	8.50541	8.32728	1.79909	1.83727	0.565013	0.3074	0.102341	0.190807	none	none	none
ENSMUSG00000001289	Pfdn5	465	108.482	106.736	101.348	133.753	109.835	98.4189	114.332	124.482	119.642	131.964	128.784	120.935	202.163	158.754	177.531	6.73501	6.84552	6.91271	7.00256	7.49572	13.5989	13.9788	13.6758	6.79442	6.63537	6.15652	7.34974	5.06058	5.24927	none	none	none
ENSMUSG00000001300	Efnb2	1011	71.9326	65.1589	76.9998	47.6419	42.2568	53.2981	21.0343	23.7986	31.127	38.6041	35.8207	30.8808	7.50793	7.22698	7.72749	6.1772	5.60681	4.71808	5.174	3.08533	13.9161	12.8743	11.3036	3.51096	3.13532	0.189632	0.0514068	0.0202586	0.105445	none	none	none
ENSMUSG00000001305	Rrp15	846	5.96268	5.76004	3.30108	8.84409	7.97342	12.2151	1.25684	9.48004	10.6279	6.66666	6.43503	8.00321	24.5011	11.9124	12.6206	2.58687	3.41651	3.02177	3.00629	4.11642	9.8147	10.2501	9.70955	2.41143	2.6151	0.465658	1.07358	1.30992	0.830027	none	none	none
ENSMUSG00000001313	Rnd2	684	3.68745	4.22178	4.59328	0	0.469613	0	7.77255	22.431	18.0745	37.2701	52.5994	63.5167	3.41454	3.68344	4.56871	2.36947	0.209812	4.09531	5.70401	2.28951	10.1597	9.89375	16.336	6.19259	6.02222	0	0.0500856	0	0	GFAP	none	Olig
ENSMUSG00000001323	Srr	1020	142.39	164.733	173.86	174.674	207.215	199.009	19.8063	29.4003	32.5051	52.6399	53.837	43.3311	10.0176	13.5854	14.808	7.33385	7.60461	4.81953	5.67061	3.78698	13.3922	13.5092	11.9262	4.56682	4.0072	1.17527	0.560353	0.566468	0.438636	none	none	none
ENSMUSG00000001333	Sync	1413	1.33876	1.14956	0	0	0	0	1.505	0.493561	0	0.31932	0.502542	0.133104	0	0.178307	0.368601	0.871401	0	0.736551	0.398703	0.241599	7.58591	5.98069	6.10879	1.01436	1.03797	0.0777313	0.0175969	0.163107	0	none	none	none
ENSMUSG00000001334	Fndc5	630	27.3574	27.5019	25.489	52.7013	38.7497	37.4929	178.902	135.606	109.715	40.1066	51.0966	52.5417	4.63401	13.5972	5.78703	4.79612	5.45882	7.15388	5.6122	3.1709	10.6906	11.4376	13.1467	5.62176	4.91934	5.93792	5.16757	2.12753	0.504398	none	none	Int_Pv
ENSMUSG00000001348	Acp5	984	1.06801	1.1005	0.70953	0	0.652876	0	0	0	0.57109	0	0	0	20.4716	39.1747	35.1985	0.970372	0.28407	0.251402	0	5.02746	NA	NA	NA	0.214125	0.0285692	0.419871	2.69295	0.852587	0.0750832	Cx3cr1	none	none
ENSMUSG00000001349	Cnn1	894	0	0.201881	0	0.523077	0.359301	0.825662	0	0	0	0.252349	0.794286	0.210375	0	0	0.291293	0.093957	0.650164	0	0.504878	0.133692	NA	NA	NA	0.137504	0.128733	0.245327	0.0595983	0.0706634	0	none	none	none
ENSMUSG00000001366	Fbxo9	1314	31.9916	33.102	30.5519	25.6236	21.7566	15.7291	38.0322	35.56	28.2259	15.2803	12.4293	12.1662	6.88754	6.1357	5.5492	5.03922	4.46182	5.12678	3.83713	2.84616	13.7087	13.7473	14.5069	5.34483	4.20997	2.25028	1.35488	0.583123	0.839747	none	none	none
ENSMUSG00000001376	Vps50	2895	81.7506	78.7384	83.082	67.6813	77.2247	78.0212	27.9135	33.4849	40.9575	20.417	16.1069	15.4618	24.3034	21.0609	21.3191	6.3609	6.23475	5.13417	4.19602	4.53778	12.5529	12.4661	11.9461	4.04789	3.31904	0.53896	0.23916	0.409681	0.642745	none	none	none
ENSMUSG00000001380	Hars	1530	74.3202	69.4794	74.1529	70.9088	79.149	75.744	62.5462	62.9029	65.0102	35.0933	32.4879	33.6815	39.689	32.2756	31.8287	6.20263	6.25299	6.01092	5.11912	5.15371	14.5212	14.4445	14.6298	5.58135	5.46423	2.50354	1.91748	1.57755	1.7381	none	none	none
ENSMUSG00000001383	Zmat2	600	407.758	418.716	458.47	568.951	486.105	532.692	242.783	194.691	252.879	175.216	177.129	160.491	175.652	157.047	175.347	8.74589	9.05053	7.85248	7.4258	7.41235	16.0687	16.0478	14.9142	6.39335	6.04279	4.18445	3.10577	2.81464	3.04854	none	none	none
ENSMUSG00000001403	Ube2c	540	0.389231	0	0	0	0	0	0	1.93723	0	1.67111	0.876657	0.696576	15.1378	2.79942	4.34027	0.175995	0	0.718738	1.05759	3.07482	NA	NA	NA	0.526069	0.59773	0.190463	0.759739	0.232613	0.189592	Cx3cr1	none	OPC
ENSMUSG00000001415	Smg5	3054	15.4851	16.6062	16.1171	16.2308	11.3593	13.0516	18.8007	16.7842	11.7764	10.268	10.3855	10.9002	5.9268	6.18731	5.37204	4.09334	3.86267	4.06928	3.52581	2.77162	13.7523	13.8027	13.6861	4.13586	3.9241	2.46575	1.64982	1.98228	1.35477	none	none	none
ENSMUSG00000001416	Cct3	1638	122.415	124.177	123.183	117.051	140.605	135.641	129.827	164.558	136.2	106.877	85.8353	105.635	111.929	91.2117	80.923	6.9572	7.04548	7.17521	6.65032	6.58027	14.2532	14.554	14.9421	5.75702	6.32121	2.39673	2.90697	2.25233	2.30996	none	none	none
ENSMUSG00000001418	Glmp	1215	17.4721	22.1331	14.6531	13.8557	15.8625	15.1881	15.7524	24.6817	24.5132	54.0325	72.6651	71.6699	82.8974	84.1898	76.5174	4.25445	3.99718	4.50138	6.06872	6.36109	11.5059	10.8632	11.8128	4.66448	5.94079	4.26926	6.49399	6.57804	5.56147	none	none	none
ENSMUSG00000001419	Mef2d	1545	173.181	155.599	140.765	129.242	117.259	109.407	103.232	75.3825	50.9213	25.4073	24.972	23.2508	40.8153	38.9744	39.2731	7.29935	6.90251	6.27634	4.67488	5.34652	14.6606	14.3675	13.1878	5.66505	4.7045	3.16598	2.81916	2.28619	2.50602	none	none	none
ENSMUSG00000001420	Tmem79	1176	0.893642	0.306941	0.296844	0.397645	0.546284	0	4.52077	0.296514	0	0.767346	0.402547	0.319856	0	0	0	0.584137	0.394671	1.3817	0.581672	0	NA	NA	NA	0.584963	0.684071	0.457812	0.200911	0.122906	0.250282	none	none	none
ENSMUSG00000001424	Snd1	2733	60.679	53.2264	54.4134	91.1992	78.0412	77.2443	40.8507	30.111	26.7303	21.4621	18.1009	21.1955	54.5857	38.5342	54.5035	5.83558	6.37785	5.06884	4.40958	5.64984	14.0291	14.5539	13.3451	4.39232	4.51349	0.148059	0.19115	0.193028	0.0790526	none	none	none
ENSMUSG00000001435	Col18a1	5325	0.0789426	0	0.327783	0	0.0603221	0.554473	62.2995	68.5614	51.4991	0.720224	1.15571	0.282555	0.657899	0.283884	0.44014	0.183423	0.268951	5.94922	0.781985	0.546602	NA	NA	NA	2.0072	0.49228	0.235869	0.131997	0	0.00644783	PV	none	EndoSM
ENSMUSG00000001436	Slc19a1	1539	4.23374	5.74632	7.71217	3.34239	2.92203	5.75549	3.45447	6.57071	5.84226	7.18283	8.92037	7.21017	5.1218	5.89351	6.76845	2.78605	2.32384	2.65286	3.13276	2.79242	9.67907	8.90859	9.27742	2.93734	2.61667	0.564147	1.29831	1.49953	1.08913	none	none	EndoSM
ENSMUSG00000001440	Kpnb1	2631	101.537	98.8496	94.8684	100.6	99.258	92.3028	77.1902	78.0634	69.4164	69.5406	63.1553	77.1317	163.004	136.843	156.388	6.63544	6.6204	6.24584	6.14858	7.25813	14.3327	14.4293	14.2894	4.99367	5.17765	1.34651	2.04512	2.69789	2.7366	none	none	none
ENSMUSG00000001441	Npepps	2763	95.3172	108.694	102.339	99.3483	109.513	133.843	72.7328	91.7501	89.8962	86.6309	62.6224	81.6831	38.2495	34.9243	35.9097	6.68813	6.84843	6.42279	6.28501	5.22347	14.4014	14.4352	14.5567	5.49697	5.70524	2.20839	1.46768	1.18593	1.16761	none	none	none
ENSMUSG00000001444	Tbx21	1593	0.131943	0	0.219139	0	0	0	0	0	0	0	0.148586	0	0	0	0	0.159664	0	0	0.0697415	0	NA	NA	NA	0.0565835	0.0285692	0.356164	0.139186	0	0	none	none	none
ENSMUSG00000001445	Mrpl10	789	38.0943	44.6056	27.4316	27.2637	35.8263	30.8729	30.9956	43.7533	33.475	23.4464	22.7997	31.4651	29.9713	25.546	22.444	5.23689	5.0144	5.21236	4.74973	4.7542	13.2415	13.8432	13.7536	4.98914	4.77575	3.79043	3.43296	3.60779	2.69957	none	none	none
ENSMUSG00000001467	Cyp51	1512	49.2099	58.0118	60.0285	50.1033	58.8469	60.0473	48.5229	69.8785	82.8806	358.095	313.874	261.465	28.5764	25.328	22.0458	5.82655	5.84128	6.08946	8.28607	4.71791	11.8646	10.6393	11.2625	4.25852	5.97789	1.44013	0.565068	0.762405	0.389258	GFAP	none	none
ENSMUSG00000001472	Tcf25	2031	236.16	247.573	239.945	211.597	205.287	191.532	186.899	166.023	127	71.2011	65.2637	65.4699	51.6039	53.9621	50.1343	7.92021	7.67105	7.33069	6.09406	5.7252	16.5363	16.4794	16.8925	7.84285	7.21607	5.67594	4.2077	3.01162	3.49519	none	none	none
ENSMUSG00000001473	Tubb6	1344	0.312775	0.134287	0.259739	0	0	0	0	0.25945	0	2.35	0.880571	2.79874	12.8159	8.24828	5.81286	0.305212	0	0.119666	1.58965	3.316	5.15395	5.22644	5.91067	1.9782	2.14839	0.796661	0.76249	1.53832	0.884501	Cx3cr1	none	none
ENSMUSG00000001482	Def8	1452	24.7531	20.012	18.5123	15.7809	13.0521	9.65888	24.8978	22.3341	6.19232	15.3818	17.1165	17.7454	9.651	8.32884	8.42945	4.46548	3.7898	4.23328	4.14958	3.29324	12.4075	12.4706	13.0723	4.22033	4.12433	1.40023	0.957522	0.5424	0.316351	none	none	none
ENSMUSG00000001493	Meox1	762	0.275833	0	0	0	0	0	0	0	0	0	0	0.246818	0	0	0.683507	0.126899	0	0	0.114064	0.296118	NA	NA	NA	0.400538	0.286881	0.0637015	0.0205681	0	0.0230933	none	EC	none
ENSMUSG00000001494	Sost	636	0	0	0	0	0	0	0	0	0	0	0.372166	0	0	0	0	0	0	0	0.168713	0	NA	NA	NA	0.238787	0	0.176966	0.132103	0	0	none	none	none
ENSMUSG00000001496	Nkx2-1	1119	0	0	0	0	0	0	0	0.623236	0	0.604825	0.846103	0.840373	0	0	0	0	0	0.272316	0.81866	0	NA	NA	NA	0.799087	0.47854	0	0.0589104	0	0	none	none	none
ENSMUSG00000001497	Pax9	1029	0	0	0	0	0	0	0	0	0	0	0	0	0	0	0.253077	0	0	0	0	0.116842	NA	NA	NA	0	0.0565835	0	0	0	0	none	none	none
ENSMUSG00000001504	Irx2	1425	0	0	0	0	0	0	0	0.734107	3.54918	4.74947	4.6509	6.73112	0	0	0	0	0	1.27963	2.67291	0	NA	NA	NA	0.863938	1.54267	1.01099	0.112705	0	0	GFAP	none	none
ENSMUSG00000001506	Col1a1	4362	0.62641	0.703388	0.560207	0.428823	0.147279	0.338442	1.2188	0.799406	0.644146	2.948	1.89922	1.33662	0.937001	1.44399	0.955218	0.704874	0.383882	0.91644	1.61414	1.07866	6.04728	6.11448	8.05463	0.731183	0.333424	1.15856	0.213281	0.0945935	0.0231559	none	none	none
ENSMUSG00000001507	Itga3	3207	8.84781	7.82254	7.61965	5.24937	7.21156	5.29381	57.6899	42.6226	38.9004	3.37661	3.83794	3.51872	1.27446	1.49267	1.62405	3.18534	2.79041	5.56695	2.19464	1.30084	8.27518	8.0106	9.29267	2.94111	1.94111	0.864302	0.141583	0.0759359	0.0185861	PV	none	none
ENSMUSG00000001508	Sgca	1164	0	0.155053	0	0	0	0	0	0	0.965555	0.193814	1.22009	1.29261	0.25081	0	0	0.0727016	0	0.40256	0.927648	0.115837	3.1003	0.594081	8.96144	0.214125	0.512648	0	0.0218258	0	0	none	none	none
ENSMUSG00000001510	Dlx3	864	0	0	0	0	0	0	1.23065	0	0.650408	0.522221	0	0.43536	0	0	0	0	0	0.702232	0.399656	0	NA	NA	NA	0.0285692	0.0565835	0	0	0	0	none	none	none
ENSMUSG00000001517	Foxm1	2274	0.369718	0.396836	0	0.411285	0.282511	0.324601	0	0	0	0.496041	0.520443	0.413534	0.385149	0.886358	0.801633	0.328283	0.421657	0	0.56235	0.757917	NA	NA	NA	0.356144	0.34861	0.101375	0.140387	0.127942	0.419321	none	none	none
ENSMUSG00000001518	Itfg2	1332	10.4146	7.04581	9.43484	10.1812	7.95803	7.75825	25.5444	13.3512	7.59396	3.89549	7.10803	7.20109	4.16435	5.48534	6.45175	3.31688	3.26791	4.04409	2.82134	2.67065	10.2772	10.7167	11.2247	3.35614	3.50843	1.96585	1.14113	1.20773	0.670917	none	none	none
ENSMUSG00000001520	Nrip2	813	1.03412	0.887976	1.28815	0.575192	1.58039	0	0	3.43125	2.76484	0.27749	0	1.15668	0.359093	0	0.64063	1.04969	0.781174	1.61606	0.5637	0.414938	8.72128	10.2861	12.1359	3.31325	1.51602	1.61705	1.03534	0.17412	0	none	none	none
ENSMUSG00000001521	Tulp3	1383	2.12768	2.7405	1.26207	2.02877	2.55486	3.20235	0	4.03414	7.31392	47.4689	46.0388	47.8688	6.755	4.73654	3.76596	1.60569	1.84612	2.25782	5.58873	2.60546	8.79062	9.0503	9.09524	2.70487	4.05658	1.94504	1.88174	1.58673	1.14528	GFAP	none	none
ENSMUSG00000001524	Gtf2h4	1392	8.30471	15.818	15.2977	11.422	9.23032	7.42384	11.4578	12.0242	7.67033	7.13102	7.14173	6.48536	6.92106	6.69688	6.54782	3.82173	3.37277	3.50895	2.98539	2.94896	11.1962	11.5409	11.3157	3.04963	3.14405	2.97789	3.04084	2.83171	2.31422	none	none	none
ENSMUSG00000001525	Tubb5	1335	760.916	772.892	783.947	510.716	550.998	483.801	362.393	337.992	268.98	193.154	185.812	162.576	499.474	368.202	377.847	9.59542	9.01171	8.34039	7.50394	8.70104	17.552	16.9079	15.6895	7.58811	7.25058	8.07372	7.65255	6.07374	5.13044	none	none	none
ENSMUSG00000001542	Ell2	1920	13.465	11.8441	13.8181	11.4472	11.2091	10.7646	16.6138	16.527	16.683	3.28999	1.8492	2.54686	3.49723	3.93668	4.069	3.81172	3.60173	4.13815	1.83269	2.27331	11.174	11.0505	11.6912	3.08746	1.92093	2.10701	1.20704	1.19713	1.44018	none	none	none
ENSMUSG00000001552	Jup	2238	37.2848	31.6124	31.9764	7.94012	13.2045	6.92626	85.5189	58.74	44.444	29.1324	26.758	29.329	58.5712	52.7986	68.304	5.11372	3.37253	5.99777	4.87806	5.92816	12.3322	11.1839	9.51027	4.19535	4.61941	2.07394	2.85382	2.41769	1.20553	none	none	none
ENSMUSG00000001555	Fkbp10	1746	0.240761	0.310105	0.399873	0.26783	0	0	0	0.399428	0.321852	58.4027	69.274	56.5519	1.83927	0.721499	0	0.39716	0.12337	0.310836	5.96369	0.890323	NA	NA	NA	1.82375	4.64347	0.76834	0.633657	0.0799636	0.042382	GFAP	none	none
ENSMUSG00000001558	Klhl10	1827	0	0.197571	0.382144	0	0	0	0	0	0	0.246962	0.129555	0.514711	0.159794	0	0	0.254882	0	0	0.375263	0.0748678	NA	NA	NA	0.189034	0.371094	0	0	0	0.0643259	none	none	none
ENSMUSG00000001566	Mnx1	1215	0	0	0	0	0	0	0	0	0	0	0	0	0.240282	0	0	0	0	0	0	0.111157	NA	NA	NA	0	0	0	0	0	0	none	none	none
ENSMUSG00000001569	Nom1	2565	19.0928	16.3946	17.8287	17.3197	14.6519	18.1298	7.87618	8.97242	9.85882	5.89286	6.92098	6.67246	11.8371	10.6083	11.8786	4.23051	4.14571	3.30779	2.90601	3.63707	11.9473	12.0004	11.7436	3.03914	2.85997	0.924493	1.02295	1.008	1.17504	none	none	none
ENSMUSG00000001576	Ergic1	873	149.031	162.909	155.551	159.091	140.187	160.649	269.171	210.099	237.526	101.042	125.263	94.7918	128.415	125.829	123.795	7.29306	7.26968	7.90648	6.75532	6.98883	13.3342	12.7974	13.1506	5.99774	5.3683	2.05321	2.69325	1.68695	1.74742	none	none	none
ENSMUSG00000001583	Tnk1	2016	0	0	0.173159	0	0.159333	0	0	0	0	0	0	0	0	0	0	0.0809574	0.0746574	0	0	0	NA	NA	NA	1.04264	1.21826	0.141291	0	0	0.0760238	none	none	none
ENSMUSG00000001588	Acap1	2223	0	0	0	0	0	0	0	0	0	0.202969	0	0	0	0	0	0	0	0	0.0944472	0	NA	NA	NA	0	0	0.129624	0	0	0	none	none	none
ENSMUSG00000001604	Tcea3	1044	0	0	0	0	0	0	0	0.334004	0	2.37701	1.81377	1.80149	0	0.482658	0.249441	0	0	0.152294	1.58372	0.315025	NA	NA	NA	0.286881	0.641546	0.0992407	0.0359139	0	0.0288484	GFAP	none	none
ENSMUSG00000001622	Csn3	546	0	0	0	0	0	0	0	0	0	0	0	0	0	0	0	0	0	0	0	0	NA	NA	NA	0	0	0	0	0	0	none	none	none
ENSMUSG00000001627	Ifrd1	1350	12.9225	13.369	16.2908	13.5093	14.5142	14.7628	14.9647	10.3319	11.6553	15.3742	12.0979	13.3743	7.56889	6.7186	7.33024	3.92544	3.93188	3.73523	3.86942	3.03666	12.5397	12.3279	12.3645	4.1811	4.62488	1.51648	0.595645	1.22593	1.49776	none	none	none
ENSMUSG00000001630	Stk38l	1416	6.53116	4.84342	6.16329	5.28397	3.85639	6.77673	11.2636	6.64895	4.36545	7.16948	4.17898	5.71133	5.15436	4.80408	4.96556	2.77525	2.65666	3.07485	2.74127	2.57886	10.4083	10.3488	11.0704	2.44361	2.96347	0.201718	0.143822	0.171207	0.202459	none	none	none
ENSMUSG00000001632	Brpf1	3759	7.32487	8.59434	7.89374	7.83739	6.92163	4.32006	3.67723	5.28756	4.63435	1.5004	2.20389	1.85123	7.45584	7.90896	7.06636	3.1599	2.87965	2.46807	1.51189	3.08356	11.2101	11.4083	10.4651	3.15704	2.58656	2.27554	2.43784	2.67382	2.6033	none	none	none
ENSMUSG00000001642	Akr1b3	951	4.19927	4.55473	4.03783	3.9338	2.02659	3.1047	2.23614	6.60001	2.95454	1.42334	1.99115	3.16426	11.0515	11.9218	10.1319	2.39614	2.0078	2.30165	1.67487	3.58917	12.3603	12.3507	12.6617	1.75702	1.9782	0.203568	0.724238	0.450581	0.217229	none	none	none
ENSMUSG00000001655	Hoxc13	987	0	0	0	0	0	0	0	0	0	0	0	0	0	0	0	0	0	0	0	0	NA	NA	NA	0	0	0	0	0	0	none	none	none
ENSMUSG00000001656	Hoxc11	915	0	0	0	0	0	0	0	0	0	0	0	0	0	0	0	0	0	0	0	0	NA	NA	NA	0	0	0	0	0	0	none	none	none
ENSMUSG00000001657	Hoxc8	729	0	0	0	0	0	0	0	0	0	0	0	0	0	0	0	0	0	0	0	0	NA	NA	NA	0	0	0	0	0	0	none	none	none
ENSMUSG00000001661	Hoxc6	708	0	0	0	0	0	0	0	0	0	0	0	0	0	0	0	0	0	0	0	0	NA	NA	NA	0	0	0.193276	0	0	0	none	none	none
ENSMUSG00000001663	Gstt1	723	13.082	10.2348	7.72534	3.88076	0.888561	5.10472	11.7653	5.30527	5.44076	46.1808	56.9645	67.6343	2.01897	1.04542	0.720377	3.50429	2.10143	3.0881	5.85615	1.17734	9.51099	9.27999	6.42616	3.7761	5.53169	1.48655	0.444029	0.372727	0.112853	GFAP	none	none
ENSMUSG00000001665	Gstt3	726	0	0.248597	0.480839	0	0	0	0	0	0	9.3223	15.3234	10.6213	1.20638	2.08221	1.0761	0.313995	0	0	3.67307	1.29566	NA	NA	NA	1.69599	3.97759	1.86807	2.18413	2.84368	0.821127	GFAP	none	none
ENSMUSG00000001666	Ddt	357	27.6714	23.2553	23.4682	20.9583	16.1957	10.3381	56.5894	69.3494	70.8344	112.484	135.256	146.983	22.8975	19.7606	14.5891	4.6892	4.07302	6.05726	7.05066	4.32786	11.8136	11.952	14.4331	5.73444	7.01614	5.67501	5.86431	4.48152	3.8626	none	none	none
ENSMUSG00000001670	Tat	1365	0	0	0	0	0	0	0	0	0	0	0	0	0	0	0	0	0	0	0	0	NA	NA	NA	0	0	0.045096	0	0	0	none	none	none
ENSMUSG00000001672	Marveld3	1158	0	0.155856	0	0	0	0	0.918208	0.301123	0.485279	0	0	0	0	0	0	0.0730689	0	0.649113	0	0	NA	NA	NA	0.189034	0.0658021	0	0.0371131	0	0	none	none	none
ENSMUSG00000001674	Ddx18	1983	2.54384	2.45738	2.64061	2.3582	2.91572	2.60564	0.5362	1.9343	3.11724	1.47897	1.19363	2.3711	7.21392	2.92223	5.77827	1.82671	1.85859	1.51731	1.4229	2.65645	11.1749	11.4356	11.1627	1.7137	2.02621	0.333018	0.903432	1.30564	1.5424	none	none	none
ENSMUSG00000001687	Ubl3	354	318.246	358.923	290.907	391.014	333.918	258.558	816.987	819.545	950.875	480.515	470.72	453.719	541.826	541.616	537.752	8.33848	8.3612	9.754	8.87442	9.08055	14.7611	15.1408	15.83	6.13832	5.51937	5.5441	5.2479	5.30396	5.57464	none	none	Olig
ENSMUSG00000001700	Gramd3	1338	0.314177	0.404666	1.56542	0	0	0.551676	0	0	2.51997	64.9147	61.2087	64.238	3.05471	1.88301	0.778524	0.81674	0.243537	0.879697	6.01019	1.53874	5.24456	6.01672	7.70731	2.94486	4.88882	0.425338	0.331945	0.105073	0.155805	GFAP	none	none
ENSMUSG00000001707	Eef1e1	525	57.2503	46.0657	51.8647	48.9899	72.1969	54.8334	133.67	118.226	144.502	49.4171	42.831	39.7645	55.0521	40.3116	42.6587	5.72047	5.89902	7.05672	5.49199	5.55482	12.0464	12.2744	13.1673	4.19535	3.57612	0.897087	0.741748	1.08663	1.09208	none	none	none
ENSMUSG00000001729	Akt1	1443	31.1708	27.5162	22.4985	36.6198	26.9349	12.7883	49.3694	36.0058	24.1449	18.7609	22.4723	24.5032	57.6602	65.3003	66.9539	4.81054	4.72507	5.22908	4.51804	6.00685	NA	NA	NA	5.79233	5.31542	4.16182	4.8019	3.53993	3.26099	none	none	none
ENSMUSG00000001739	Cldn15	684	0	0.263861	0	0	0	0	0	0	0	0	0	0	0	0	0	0.121617	0	0	0	0	NA	NA	NA	0	0	0.0456915	0.0373113	0	0	none	none	none
ENSMUSG00000001741	Il16	3969	0.0529566	0.0909454	0.175908	1.53167	1.69955	1.67379	28.665	15.0234	20.3883	0.341043	0.17891	0.331703	57.0057	39.9916	42.9762	0.146138	1.39781	4.48278	0.360516	5.57464	3.55527	9.29285	5.89756	3.1635	2.64155	0.458277	1.51913	1.93812	1.67701	none	none	none
ENSMUSG00000001750	Tcirg1	2505	0.587342	0.288194	0	0.373358	0.12823	0	0.84893	0.278404	0.448665	2.79185	3.49613	4.20448	21.3276	26.9548	29.5242	0.369433	0.223047	0.609124	2.16912	4.75144	6.3318	6.46432	9.3829	1.46467	2.48371	1.5325	2.71575	4.48721	5.11628	Cx3cr1	none	none
ENSMUSG00000001751	Naglu	2220	2.65098	2.11374	2.51596	1.05322	1.59161	1.66248	1.43687	2.67023	4.80951	6.09729	9.9157	9.74265	46.1585	51.4109	51.4967	1.7769	1.28438	1.98994	3.26081	5.66359	7.56371	7.44265	7.58323	2.04963	2.81967	2.03022	4.44001	5.05263	4.38049	Cx3cr1	none	none
ENSMUSG00000001755	Coasy	1692	7.08069	9.8134	9.28428	11.3315	8.73279	8.28883	8.16944	8.03743	5.97822	12.8	14.1291	16.3399	10.6977	10.4234	12.3128	3.28186	3.38557	3.06954	3.94701	3.60225	11.2153	11.3493	11.3556	3.35332	4.31904	3.29742	3.49804	3.45499	3.30538	none	none	none
ENSMUSG00000001761	Smo	2382	0.0882387	0	0.146553	0	0.134851	0	5.3566	4.24531	4.24649	8.23979	10.8312	9.08005	2.69637	2.2212	2.73317	0.10871	0.0634343	2.48958	3.37625	1.82792	4.85954	7.41829	6.0787	2.22651	3.8953	0.520524	1.06802	1.21812	1.21899	none	none	none
ENSMUSG00000001763	Tspan33	852	23.9295	26.0554	23.3545	14.8193	18.4736	12.1291	3.74396	11.0504	11.8722	34.1577	37.7827	33.5534	16.1048	19.517	14.977	4.66939	4.01263	3.3058	5.17651	4.15917	10.4427	9.95021	8.52904	3.9542	3.85133	2.74805	3.26805	2.99264	2.56399	none	none	none
ENSMUSG00000001767	Crnkl1	2073	24.0298	21.9398	23.0705	26.8442	31.9201	31.6906	13.3359	11.1019	10.5722	10.9916	9.93375	11.0686	32.8136	24.9152	21.6071	4.58577	4.96124	3.66335	3.54407	4.77849	11.6625	11.7185	11.0095	2.7137	3.06924	0.800496	0.766624	0.545634	0.875778	none	none	none
ENSMUSG00000001768	Rin2	2712	3.02257	3.32746	2.18824	4.65562	3.79015	3.81047	1.96033	1.54292	1.24326	22.6265	26.1833	34.3973	138.328	119.285	150.757	1.94339	2.34636	1.36858	4.84477	7.09933	8.13276	8.27981	8.05645	2.83996	4.74165	0.213421	0.266178	1.3825	1.5898	Cx3cr1	none	none
ENSMUSG00000001773	Folh1	2259	0.837389	0.798943	0.463598	1.24205	1.56413	3.59432	0	1.08052	2.48762	103.662	96.5021	102.405	0.904648	2.00755	0.806956	0.765515	1.64777	1.13052	6.67039	1.16332	NA	NA	NA	1.53605	3.03797	0.0486181	0	0	0	GFAP	none	none
ENSMUSG00000001774	Chordc1	996	85.6777	103.106	115.662	132.871	123.842	162.302	99.2826	193.956	246.56	47.1132	33.5084	30.2129	76.5031	53.1214	48.8934	6.67923	7.13619	7.49931	5.24583	5.91901	12.4852	12.6129	12.8425	4.58736	3.96162	0.413755	0.217084	1.00852	1.456	none	none	none
ENSMUSG00000001783	Rtcb	1518	77.1231	79.4212	80.7182	80.711	93.529	94.8206	77.0496	59.7248	44.053	38.1944	34.7717	35.3106	80.0054	74.522	79.2571	6.32351	6.50282	5.93724	5.21305	6.30247	13.5222	13.693	13.6638	5.79546	6.08435	3.12858	3.57646	2.82153	2.35017	none	none	none
ENSMUSG00000001785	Pwp1	1506	16.8873	17.1373	15.7623	15.8361	22.822	17.6448	10.5905	8.56702	10.0749	10.3362	10.8447	12.4884	23.6501	18.0679	17.4648	4.13715	4.30507	3.42547	3.61154	4.37348	11.4539	11.5136	11.4954	3.07382	3.35426	0.71542	0.730791	1.04596	1.12101	none	none	none
ENSMUSG00000001786	Fbxo7	1572	18.7187	19.1733	17.7653	17.551	14.7121	13.1476	18.9389	22.182	23.236	17.2213	16.1111	21.1764	20.0571	15.5464	14.9093	4.28928	4.01229	4.48879	4.26075	4.15685	10.5987	10.5903	10.4643	3.80941	4.62488	1.14886	0.933897	1.05018	0.872539	none	none	none
ENSMUSG00000001794	Capns1	807	126.58	116.519	106.414	163.99	120.207	107.932	324.124	276.541	205.423	210.783	217.633	265.683	332.822	289.412	341.736	6.87657	7.04121	8.07519	7.86026	8.33236	13.8587	13.9483	14.1956	6.52982	7.23796	4.09028	5.47908	4.55428	4.17081	none	none	none
ENSMUSG00000001802	Lrp3	2373	12.8431	9.50702	9.85628	12.612	9.74609	9.64281	7.61729	11.1678	8.05158	2.94715	3.39137	3.96282	0.738161	1.59259	1.09741	3.5528	3.54436	3.31405	2.14854	1.09944	12.5475	12.2738	12.8444	4.58256	4.37202	2.75871	1.17694	0.317639	0	none	none	none
ENSMUSG00000001804	Dsg4	3126	0	0	0	0	0	0	0	0	0	0	0	0	0	0	0	0	0	0	0	0	NA	NA	NA	0	0	0	0	0	0	none	none	none
ENSMUSG00000001815	Evx2	1428	0	0	0	0	0	0	0	0.244188	0	0	0	0	0	0	0	0	0	0.112895	0	0	NA	NA	NA	0.0285692	0	0	0	0	0	none	none	none
ENSMUSG00000001819	Hoxd13	1020	0	0	0	0	0	0	0	0	0	0	0	0	0	0	0	0	0	0	0	0	NA	NA	NA	0	0	0	0	0	0	none	none	none
ENSMUSG00000001823	Hoxd12	807	0	0	0	0	0	0	0	0	0	0	0	0	0	0	0	0	0	0	0	0	NA	NA	NA	0	0	0	0	0	0	none	none	none
ENSMUSG00000001827	Folr1	768	0.273678	0.470003	1.36363	0	0	0	0	0.908075	3.65855	6.16874	7.08859	4.65291	1.52054	1.64028	2.37359	0.767601	0	1.33469	2.80118	1.50833	NA	NA	NA	0.214125	1.09761	1.12052	0.586671	0.458012	0.0941535	none	none	none
ENSMUSG00000001829	Clpb	2124	28.3017	27.9559	29.4195	31.7038	23.2896	28.1495	28.5345	15.4321	14.0224	18.4813	18.0532	21.8713	9.89637	9.01507	10.6668	4.88553	4.8437	4.34551	4.35534	3.44087	12.473	12.5161	12.3042	3.32769	3.76129	0.655208	0.387094	0.287816	0.226641	none	none	none
ENSMUSG00000001833	2007-09-01	1314	740.445	784.146	950.298	535.961	656.608	723.536	335.817	438.662	481.979	646.067	514.466	561.65	301.497	245.045	268.344	9.68993	9.32126	8.71363	9.16757	8.09079	16.2491	15.5656	15.6912	7.16068	7.18349	1.03924	0.218344	0.798992	1.1678	none	none	none
ENSMUSG00000001844	Zdhhc4	1032	6.11002	5.07166	3.04438	4.07818	4.04631	4.29152	4.12126	5.06832	7.07886	8.30696	12.3853	8.20096	4.52625	6.10338	3.0281	2.52156	2.3614	2.68321	3.41022	2.47316	10.4036	10.4941	10.6328	3.65076	3.4957	2.23072	2.0347	1.50664	1.62957	none	none	none
ENSMUSG00000001847	Rac1	636	429.623	485.824	384.217	451.455	433.842	356.304	285.883	268.653	194.386	471.773	454.414	535.542	923.568	955.895	908.591	8.76229	8.69651	7.96948	8.93146	9.86163	16.1315	16.3586	15.1844	6.72574	7.19081	3.98789	4.33145	4.49636	4.10704	none	none	none
ENSMUSG00000001855	Nup214	6258	10.0424	7.95986	6.41503	6.42638	7.13469	6.6053	11.044	7.29942	8.26137	4.75857	4.42531	4.32772	11.7094	11.0715	13.1082	3.19205	2.949	3.3028	2.46045	3.69633	NA	NA	NA	2.53107	2.34293	0.593206	0.537289	0.742721	0.682054	none	none	none
ENSMUSG00000001864	Aif1l	453	1.85593	0.796827	0	0	0	0	0	1.53952	1.24051	30.3788	30.3056	24.9107	1.28893	3.33705	0.57487	0.913993	0	0.946115	4.88419	1.45081	NA	NA	NA	1.848	2.83323	0.392101	0.225317	0	0	GFAP	none	none
ENSMUSG00000001865	Cpa3	1254	0	0	0	0	0	0	0	0	0	0	0	0	4.65619	5.02287	3.53036	0	0	0	0	2.4338	NA	NA	NA	0	0	0	0	0	0	Cx3cr1	none	none
ENSMUSG00000001870	Ltbp1	5142	0.735769	0.526491	0.611008	0	0	0	0	0.271257	0	18.4709	20.5764	18.9831	0.340657	0.293988	0.20258	0.699927	0	0.124883	4.34649	0.355101	NA	NA	NA	0.9855	2.84933	0.00800603	0.0017654	0	0	GFAP	none	none
ENSMUSG00000001891	Ugp2	1527	51.3418	54.6053	58.5244	53.5923	56.586	73.4758	48.0463	82.4368	98.2589	387.819	292.035	282.791	64.8125	47.1886	49.798	5.80281	5.95926	6.27141	8.33039	5.7796	13.1986	13.2417	14.4569	4.848	6.42459	0.811184	0.383286	0.813589	1.14582	GFAP	none	none
ENSMUSG00000001901	Kcnh6	2853	1.39976	1.20194	0.85651	0.491726	0.112588	0	0	0.733335	0	0.553522	0.331858	1.05475	0.102328	0.264929	0.273834	1.10617	0.264762	0.315502	0.719587	0.279408	8.95466	8.25365	8.76466	0.765535	0.238787	0	0.0131847	0	0	none	none	none
ENSMUSG00000001909	Trmt1	1992	12.5562	13.5905	12.2672	12.9115	11.2877	10.0049	8.54044	16.4548	6.77052	4.64337	4.15884	4.53194	8.94002	8.09469	6.53655	3.78708	3.63243	3.53463	2.44486	3.14683	11.4796	11.6339	11.9111	3.78869	3.37944	3.09583	2.83983	2.9339	3.005	none	none	none
ENSMUSG00000001910	Nacc1	1545	35.915	31.4236	35.6997	28.1487	28.4831	27.2324	37.1633	25.7294	26.1881	23.5091	22.3675	24.2246	15.1168	20.7102	16.6869	5.14348	4.85573	4.93987	4.60686	4.20981	14.3949	14.5303	14.4231	4.57046	4.43874	2.73117	2.0437	1.63502	1.15017	none	none	none
ENSMUSG00000001911	Nfix	1485	174.092	147.302	168.315	201.223	187.754	189.382	122.439	56.8253	89.307	182.303	190.155	211.886	35.5836	42.4154	35.9497	7.35963	7.59832	6.50022	7.6131	5.28477	13.751	14.0453	10.0752	5.56377	5.82697	3.1085	1.78933	1.53612	1.2457	none	none	none
ENSMUSG00000001918	Slc1a5	1668	0.12601	0	0	0	0	0	0	0	0	1.08201	1.41905	0.45102	1.05015	1.35943	1.56125	0.0593599	0	0	0.988432	1.21637	NA	NA	NA	0.485427	0.672048	0.217127	0.128598	0.279747	0.145834	none	none	none
ENSMUSG00000001924	Uba1	3177	273.233	267.455	246.021	237.422	262.877	234.663	209.511	188.454	145.043	110.208	98.0465	125.028	113.763	105.632	96.0679	8.04022	7.94244	7.50782	6.80857	6.73002	16.4419	16.4117	16.5267	6.45681	6.55244	3.37526	2.98286	3.42367	2.78588	none	none	none
ENSMUSG00000001930	Vwf	8442	0.273872	0.106895	0.0413515	0.110787	0.0380496	0	0	0.206527	0.0665663	0.320682	0.14019	0.222785	0.138329	0.387979	0.40102	0.189927	0.0698563	0.125692	0.296176	0.388585	6.60383	4.24462	7.6704	0.400538	0.172061	0.0594543	0.0240077	0.0481865	0.00293275	none	EC	none
ENSMUSG00000001942	Siae	1626	17.8385	16.3166	18.6782	12.079	11.4579	12.7109	24.8492	13.725	15.8978	38.9874	34.209	41.062	35.0116	39.2021	34.594	4.21809	3.70958	4.25983	5.28859	5.21991	11.1127	9.80124	10.0921	3.04264	3.52607	0.539421	0.406568	1.19981	0.999859	none	none	none
ENSMUSG00000001943	Vsig2	987	1.06477	0.731433	2.12212	1.42137	0.650892	0.747864	0	0	0	0.228571	0	0	0	0	0	1.20546	0.956088	0	0.105933	0	5.67537	6.8644	3.77017	2.4957	1.22651	0.239231	0.125206	0	0	none	none	none
ENSMUSG00000001946	Esam	1185	4.2569	5.02606	3.53508	1.18388	1.35534	2.49162	4.48643	0.588524	0.948443	0.951897	0	0.952281	0.985461	0.850455	0.879042	2.39854	1.42059	1.58871	0.709049	0.929781	7.87798	7.68299	7.51648	2.24489	1.0048	0.961193	0.28714	0.0847278	0.0575268	none	EC	EndoSM
ENSMUSG00000001948	Spa17	450	8.40738	6.81818	6.98178	7.27426	4.28287	6.56126	16.54	8.52379	19.9805	19.0506	16.3058	18.3896	1.94629	2.23953	1.15741	3.07081	2.81547	4.00133	4.24149	1.47564	8.27113	8.13664	8.38077	1.926	2.44361	0.576653	0.205047	0.230162	0.0380927	none	none	none
ENSMUSG00000001962	Fam50a	1020	35.2368	27.2491	29.433	30.2585	33.0662	43.4201	22.9336	23.9304	20.9355	20.7906	19.7248	20.0983	78.1376	53.1066	66.1253	4.98366	5.19305	4.56071	4.4063	6.06156	NA	NA	NA	3.31325	4.16993	1.81647	2.88804	2.90181	2.87104	none	none	none
ENSMUSG00000001964	Emd	780	68.4447	64.5567	58.629	66.5475	76.1856	66.2435	40.8956	53.6463	55.4748	43.3845	37.9323	39.7852	56.8914	62.3408	56.4235	6.01963	6.1428	5.67258	5.37042	5.89608	13.4729	13.5413	12.9812	4.65764	4.80701	3.15864	4.78086	4.14945	3.52172	none	none	none
ENSMUSG00000001983	Taco1	885	33.012	31.8136	31.9505	30.647	26.4957	34.1964	20.4247	27.5808	20.9542	22.9423	20.0591	28.6895	18.4732	15.0884	21.1864	5.05566	4.97482	4.58415	4.6379	4.26674	11.2633	11.5951	12.0352	3.25096	3.60011	0.466132	0.59676	0.615946	0.285478	none	none	none
ENSMUSG00000001985	Grik3	2760	24.6738	20.4022	21.3754	5.9301	6.28464	6.95351	30.0493	21.9833	16.8993	4.57738	6.51775	2.86202	1.69242	2.4647	1.50966	4.53297	2.88546	4.5836	2.49886	1.53053	11.4772	9.67201	10.7769	3.82375	2.57046	0.409073	0.109582	0.0106766	0.00538752	none	none	none
ENSMUSG00000001986	Gria3	2667	242.102	230.897	231.024	329.113	283.517	324.096	229.242	266.853	311.002	38.6573	38.6952	15.5848	10.837	18.3269	13.5725	7.88065	8.29113	8.07699	4.99906	3.93031	14.294	13.4384	14.1467	5.19928	3.71589	0.368207	0.0286849	0.0217445	0.00934095	none	none	none
ENSMUSG00000001988	Npas1	1785	0.471002	0.40444	0	0	0.179952	0	0	0.586052	0	0.126386	0	0.105364	0.163553	0.423441	0	0.369398	0.0840427	0.257434	0.107353	0.257813	5.58031	5.37753	6.32415	2.20163	0.653824	1.25854	0.224298	0.0418289	0.0282646	none	none	none
ENSMUSG00000001995	Sipa1l2	5169	7.80721	6.70389	6.82105	8.32309	6.52497	6.99728	8.02246	6.81346	5.10965	5.76111	6.77717	4.40262	28.2963	27.6367	26.8024	3.01983	3.04994	2.93518	2.7327	4.83686	11.3769	11.7249	12.5011	3.51854	3.61196	0.530174	1.24707	0.72994	0.660887	Cx3cr1	none	none
ENSMUSG00000001998	Ap4e1	3369	2.37074	2.51784	2.59045	2.22087	2.09757	3.50557	1.57804	3.41559	3.66962	2.54461	1.61592	1.95389	4.15947	4.03834	4.79246	1.80447	1.8512	1.95894	1.60319	2.41416	6.82898	6.73717	7.22524	1.57531	0.946107	0.241528	0.209637	0.339153	0.533997	none	none	none
ENSMUSG00000001999	Blvra	888	30.5336	33.3321	38.9187	30.5435	23.5124	19.1185	23.9479	51.0485	27.2117	18.0378	17.8589	17.3673	61.8077	54.7588	47.8016	5.14002	4.66627	5.13214	4.22918	5.80192	11.1875	11.2733	13.121	3.93168	3.9386	2.2638	3.4161	2.52233	1.88884	none	none	none
ENSMUSG00000002006	Pdzd4	2319	18.2178	13.3863	18.6663	18.1487	18.0069	10.1857	4.5851	6.46577	3.15023	4.76687	4.69516	2.59526	0.75535	2.82477	1.90905	4.1503	4.03976	2.51947	2.32743	1.50066	14.5414	14.6725	13.4279	5.02059	3.75916	2.6238	1.80688	0.249951	0.091471	none	none	none
ENSMUSG00000002007	Srpk3	1698	1.23784	1.1692	0.411177	0	0	0	0	0.410719	0	0.132862	0.278795	0.110763	6.36153	4.8965	6.90149	0.955612	0	0.185114	0.231605	2.81827	7.6122	5.20674	8.30547	0.485427	0.302563	1.28752	2.58741	3.05971	3.55781	Cx3cr1	none	none
ENSMUSG00000002010	Idh3g	1182	188.668	198.041	202.011	174.471	200.284	218.57	205.101	176.12	167.35	179.602	165.408	203.51	168.201	137.271	146.952	7.62381	7.63499	7.52244	7.52231	7.2461	14.1929	14.5059	15.2242	6.11312	6.93286	4.28288	3.71092	4.49995	4.04567	none	none	none
ENSMUSG00000002012	Pnck	1032	60.8965	69.4293	52.0927	43.5006	56.9596	48.6373	42.2429	26.0174	18.5139	30.8232	28.8991	16.4019	7.07226	7.07992	5.80385	5.94968	5.66389	4.90327	4.72109	2.93584	13.3992	13.6581	12.441	5.13175	4.21361	4.29767	2.99312	1.03782	0.899537	none	none	none
ENSMUSG00000002014	Ssr4	522	127.641	127.236	126.394	110.189	109.533	117.367	156.845	197.731	201.313	125.765	110.187	116.376	511.739	471.557	462.962	7.00102	6.82481	7.54145	6.88805	8.91614	11.9342	11.7919	12.3685	5.11103	5.1893	3.94859	5.79729	5.70103	5.2024	none	none	none
ENSMUSG00000002015	Bcap31	738	100.535	116.408	134.338	130.531	104.895	124.024	187.299	228.687	285.545	183.414	178.325	178.137	270.186	298.035	310.523	6.88379	6.91668	7.87556	7.49952	8.19925	12.4092	11.8535	12.6405	5.66959	6.09944	1.18258	1.93926	2.64826	2.21758	none	none	none
ENSMUSG00000002017	Fam98a	1548	19.0089	19.1207	18.7173	21.1461	16.1853	15.2587	27.4751	34.6899	22.1441	19.0914	12.9969	16.0374	25.0829	15.9502	15.8134	4.31824	4.21179	4.8631	4.09102	4.31823	10.9803	10.7288	11.8195	3.21723	3.56641	1.23645	0.961818	1.30734	1.62845	none	none	none
ENSMUSG00000002020	Ltbp2	5430	0.0774161	0.0997134	0.064289	0	0	0	2.15398	0.577957	1.13839	0.290828	0.305135	0.103909	0	0	0.0959176	0.111663	0	1.19542	0.302513	0.0454046	NA	NA	NA	0.895303	0.545968	0.0117224	0	0	0.00838956	none	none	none
ENSMUSG00000002028	Kmt2a	11901	10.0315	8.05273	7.59718	9.5483	9.87855	8.86936	2.94836	3.51601	4.15527	1.49755	1.84966	1.51712	2.67387	2.77331	2.99782	3.25708	3.38295	2.18265	1.39036	1.93168	12.6176	13.0068	12.8218	3.12763	1.848	1.6372	0.838688	1.0929	2.00879	none	none	none
ENSMUSG00000002031	Ift46	1059	34.9315	34.5965	31.6455	38.8589	34.2751	36.2449	29.1173	29.3053	28.1242	25.1376	23.4686	28.0604	18.7461	16.8917	17.9513	5.11788	5.22726	4.89961	4.73094	4.23749	12.3336	12.5207	12.4189	3.44626	3.60249	1.58317	2.26096	1.18054	1.35913	none	none	none
ENSMUSG00000002032	Tmem25	1098	53.2161	56.2155	44.1925	44.2929	29.5471	26.2182	117.174	143.228	131.532	12.3278	16.3834	12.8467	2.92475	6.19543	2.84608	5.7062	5.10235	7.0405	3.89265	2.31868	11.64	11.119	13.2166	4.75061	3.75417	3.12694	1.82487	0.484176	0	none	none	none
ENSMUSG00000002033	Cd3g	549	0	0	0	0	0	0	0	0	0	0	0	0	0	0	0	0	0	0	0	0	NA	NA	NA	0.0285692	0	0	0.188173	0	0	none	none	none
ENSMUSG00000002043	Trappc6a	552	6.09231	4.57742	3.16204	5.9301	3.49147	2.67443	0	6.94875	8.14424	7.76521	15.8656	13.9694	18.5109	15.9749	17.4554	2.48815	2.33113	2.5924	3.75845	4.19485	9.55766	9.71811	10.4321	3.09761	3.64539	3.06562	4.18331	3.29722	2.62679	none	none	none
ENSMUSG00000002052	Supt6	5181	58.0127	47.7939	48.041	67.8746	70.3685	61.12	21.9594	17.8355	13.8834	12.8889	9.45693	12.1608	23.4411	21.105	18.8992	5.70826	6.07584	4.23976	3.64411	4.46913	12.2239	12.4898	11.3984	4.81352	4.78206	3.03279	1.94923	1.49722	1.21151	none	none	none
ENSMUSG00000002055	Spag5	3498	1.20174	1.08351	1.39715	0.668426	0.367313	0.211018	15.8064	16.6475	15.1011	9.41611	9.27031	10.9684	1.41882	0.432157	0.446683	1.1554	0.501399	4.07482	3.44426	0.820392	8.04321	7.39726	7.50366	1.57531	2.50927	0.308833	0.0868281	0.0829771	0	none	none	none
ENSMUSG00000002057	Foxn1	1947	0	0	0	0	0	0	0	0	0	0	0	0	0	0	0	0	0	0	0	0	NA	NA	NA	0	0	0.0325841	0.0102356	0.0305138	0.0339535	none	none	none
ENSMUSG00000002058	Unc119	789	16.5164	19.901	17.6978	17.7806	10.585	4.67771	8.08581	30.0528	14.9569	24.876	24.8997	19.5465	4.07018	4.47055	1.32023	4.25084	3.5867	4.22485	4.5914	2.09996	11.8075	11.9221	13.8511	4.60644	4.67845	3.29638	2.50582	1.18061	0.165704	none	none	none
ENSMUSG00000002059	Rab34	795	2.64383	1.58914	2.19553	5.88215	2.82831	0	1.33746	3.50894	1.41372	41.9984	37.2166	48.2609	12.1184	12.0428	10.1546	1.65207	1.96476	1.62607	5.44268	3.63675	8.55458	9.54674	9.67095	2.49057	4.255	2.30185	3.71722	3.22015	2.84865	none	none	none
ENSMUSG00000002064	Sdf2	660	124.2	117.039	104.198	111.24	110.965	127.497	269.043	206.05	177.952	163.731	184.337	165.848	114.123	91.999	69.0498	6.85979	6.87734	7.77269	7.42882	6.53487	12.9366	12.6592	13.3087	5.09845	5.81643	3.24093	3.11768	3.79207	3.43046	none	none	none
ENSMUSG00000002068	Ccne1	1227	26.7227	34.7136	26.4591	22.1048	21.4667	15.6411	19.0646	27.5664	24.2734	3.30953	3.08652	2.45249	1.66553	2.2587	1.69791	4.92117	4.37417	4.62263	1.98167	1.52308	11.612	10.7242	12.3233	3.02857	2.18481	1.16341	1.0205	0.0765143	0.17762	none	none	none
ENSMUSG00000002076	Hsf2bp	1017	0.206671	0	0	0	0	0	0	0.342872	0	0	0	0	0.287063	0.247736	0.256063	0.0961139	0	0.156126	0	0.337563	NA	NA	NA	0.0840643	0.0191088	0.0247997	0.0038098	0.0259154	0.0743579	none	none	none
ENSMUSG00000002083	Bbc3	582	5.05599	5.892	5.39828	2.41047	7.72682	5.07314	3.6539	4.79314	1.93111	2.7134	2.44018	0.323154	16.0518	6.49349	6.71176	2.68902	2.60173	2.15684	1.49855	3.42658	9.8956	10.0735	7.9379	1.67807	1.08406	1.78859	2.19327	1.66142	1.18063	none	none	none
ENSMUSG00000002100	Mybpc3	3837	0.273892	0.564445	0.363919	0	0	0	1.93979	0.908785	0.439369	0.0587958	0.185064	0.196065	0.228259	0.0656626	0.13574	0.486201	0	1.06763	0.197415	0.193103	9.11698	4.72897	5.38855	1.72247	1.69896	0.418723	0.164646	0.0402812	0.144824	none	none	none
ENSMUSG00000002102	Psmc3	1356	225.84	201.91	205.952	215.883	225.277	212.842	136.439	118.034	111.064	75.8654	72.9642	70.5976	141.235	116.498	129.824	7.72951	7.77479	6.9407	6.21223	7.02443	14.9159	15.1189	14.6386	6.35297	6.65277	3.98995	4.37227	3.56156	3.06505	none	none	none
ENSMUSG00000002103	Acp2	1305	72.9606	66.6605	71.4228	72.0259	78.7654	72.9658	91.2551	99.9341	105.931	120.838	115.719	113.71	211.631	215.845	203.743	6.1568	6.24004	6.64444	6.87965	7.72387	11.9606	11.5609	12.2666	4.12433	4.41007	2.78831	4.08149	5.45821	5.19591	none	none	none
ENSMUSG00000002104	Rapsn	1239	0.339281	0.291334	0.281751	0	0	0.595756	0	0	0	0.546246	0.382078	0.303592	13.4308	19.5213	17.8655	0.383079	0.261333	0	0.496349	4.16505	NA	NA	NA	0.378512	0.238787	0.267081	3.09576	3.46508	2.37595	Cx3cr1	none	none
ENSMUSG00000002105	Slc39a13	1125	3.73662	2.8877	3.41331	4.98806	1.71315	1.31225	13.232	14.5679	6.99319	3.60959	6.52233	7.6902	4.93059	5.59883	4.62962	2.11965	1.87623	3.65509	2.79508	2.59765	8.67261	8.61352	11.1907	3.40599	3.41954	2.61949	3.12182	3.17744	2.89414	none	none	none
ENSMUSG00000002107	Celf2	1581	379.688	380.711	380.664	385.404	441.29	430.933	242.787	193.208	225.705	110.017	111.088	95.8816	222.881	187.566	190.412	8.57499	8.71496	7.7916	6.7369	7.65311	14.654	14.7772	13.3134	5.1127	4.2193	1.16159	0.504425	1.28398	1.47449	none	none	none
ENSMUSG00000002108	Nr1h3	1338	0.314177	0.269778	0	0.3495	0	0	0	1.56368	0.419995	1.85471	4.4226	4.3575	0	0	0.194631	0.25659	0.158983	0.732247	2.18426	0.0906868	5.58276	7.8308	7.53132	1.57531	2.30646	0.458695	0.451252	0.483012	0.437229	GFAP	none	none
ENSMUSG00000002109	Ddb2	1299	5.33956	3.89028	3.22484	4.67991	3.4619	2.84119	0.818541	1.34219	1.73042	1.56305	5.46645	5.21225	4.27014	5.23678	2.80664	2.36501	2.22064	1.19978	2.34499	2.35178	7.52168	7.33667	7.77006	3.1177	3.28491	0.175688	0.130917	0.373467	0.660152	none	none	none
ENSMUSG00000002111	Spi1	819	0.513271	0.440736	0	0	0	0	0	0	0	0	0.289008	0.22964	501.543	463.903	431.801	0.398353	0	0	0.230059	8.8665	NA	NA	NA	1.52607	1.31421	1.06881	4.49465	5.32964	4.50991	Cx3cr1	none	none
ENSMUSG00000002129	Sf3a1	2376	38.8346	39.4993	34.5269	41.1342	40.0167	41.6292	49.6736	54.301	48.485	39.5939	45.2275	37.3618	51.9747	41.355	37.7034	5.27129	5.3898	5.69543	5.38293	5.48148	13.8092	13.8465	13.5769	4.23726	4.49014	1.34513	1.16002	1.71526	1.06239	none	none	none
ENSMUSG00000002147	Stat6	2514	5.35076	4.16385	4.72117	1.11606	1.14993	2.05529	1.26884	1.66444	2.23529	1.07685	0.847365	0.59849	62.244	52.6143	66.8132	2.52237	1.28713	1.44512	0.880412	5.94386	10.1096	9.56467	8.92332	2.20789	1.44361	0.608662	2.64002	2.91298	2.84157	Cx3cr1	none	none
ENSMUSG00000002190	Clgn	1836	8.92941	7.176	6.84488	7.13163	6.29833	7.63872	15.6365	21.2715	28.4649	1.22876	1.41812	0.819501	7.95051	7.95912	8.65217	3.11272	3.00412	4.51039	1.108	3.19964	10.0584	9.68591	11.3954	2.21412	1.1021	0.0413901	0.389318	0.187207	0.289109	none	none	none
ENSMUSG00000002204	Napsa	1260	0	0	0	0	0	0	0	0	0	0	0	0	0.463401	0.199958	0.20668	0	0	0	0	0.367386	NA	NA	NA	0.137504	0.0749621	0.113891	0.168609	0.406005	0.041053	none	none	none
ENSMUSG00000002205	Vrk3	1362	8.02467	7.02313	8.2018	10.6436	9.66947	14.6328	13.2715	13.5691	8.25188	23.1894	22.5923	24.9939	22.721	14.0587	12.8105	3.12926	3.66091	3.66647	4.62011	4.13176	11.7936	12.382	11.8368	3.87381	4.72792	3.51916	4.287	3.72882	3.6204	none	none	none
ENSMUSG00000002210	Smg9	1563	26.0882	22.9787	26.8015	13.7627	14.1803	18.4181	21.0888	12.9396	16.5386	10.681	11.8122	18.2901	20.9198	20.7941	25.4918	4.71641	4.04034	4.15831	3.86735	4.54855	12.437	12.0274	12.1267	3.62761	4.15435	2.32809	2.32793	2.44471	2.06937	none	none	none
ENSMUSG00000002221	Paxip1	3171	7.55631	7.7406	6.82546	8.7008	7.69862	7.91448	4.02378	4.39862	3.36711	4.90898	4.18009	3.55867	3.77473	4.84667	4.51684	3.06594	3.1866	2.30154	2.38292	2.42745	12.7196	12.9959	12.526	2.82375	1.82917	0.807019	0.473857	0.294242	0.433888	none	none	none
ENSMUSG00000002222	Rmnd5a	1176	61.84	59.0861	77.4764	57.2609	65.5541	81.5973	119.348	130.17	154.346	35.2979	28.9834	21.7502	53.6222	43.4909	47.3887	6.06898	6.1114	7.08344	4.89128	5.61963	11.9016	12.0403	12.1851	5.12184	4.22136	1.07235	0.852783	0.576622	0.87956	none	none	none
ENSMUSG00000002227	Mov10	3234	0.129984	0.279037	0.32383	0.144598	0.0993244	0	0	0.215647	0	0.418552	0.365951	0.465245	4.24283	4.0511	3.6236	0.315316	0.112777	0.100146	0.502415	2.31397	8.70787	8.71048	7.51452	0.799087	0.436517	0.191937	0.55365	0.991409	0.713779	Cx3cr1	none	none
ENSMUSG00000002228	Ppm1j	1524	0.137916	0.236852	0.458122	0	0	0	2.09308	1.60164	0.737471	0	0	0	0.383127	1.32256	0.683507	0.35347	0	1.30883	0	0.845107	6.57393	4.74588	5.82477	0.526069	0.0931094	1.90083	1.08857	0	0	none	none	none
ENSMUSG00000002233	Rhoc	582	2.52799	3.41116	1.79943	3.21396	0	0	0	0.599142	0.965555	48.4535	39.4496	62.0455	56.6831	56.7098	44.2976	1.83977	1.05055	0.605556	5.67194	5.74318	9.49311	6.22571	7.68837	3.58976	5.39643	3.33628	3.73409	3.43736	2.36676	none	none	none
ENSMUSG00000002240	Prr27	1059	0	0	0	0	0	0	0	0	0	0	0	0	0	0	0	0	0	0	0	0	NA	NA	NA	0	0	0	0	0	0	none	none	none
ENSMUSG00000002249	Tead3	1398	0.150347	0	0.249706	0	0	0	0	0	0	4.03433	3.38623	4.70861	0.626487	0.901099	1.6765	0.180595	0	0	2.3343	1.04826	NA	NA	NA	0.526069	1.65076	0.323583	0.779395	0.510477	0.369517	none	none	none
ENSMUSG00000002250	Ppard	1323	3.33626	3.68329	4.74951	4.59501	2.67072	2.23172	26.5218	22.9304	12.3179	6.99137	7.69311	6.53928	15.0054	15.2349	20.4711	2.29954	2.0586	4.4323	3.01339	4.16219	10.1344	10.0758	11.2613	3.31325	3.10545	3.97689	4.80346	4.87034	3.83668	none	none	none
ENSMUSG00000002257	Def6	1893	0.111033	0.0953414	0.18441	0.988127	0.169686	0	0.561693	0.368411	0	0	0.250076	0.0993531	8.01956	7.18709	6.8784	0.176657	0.470862	0.389605	0.158953	3.06379	5.66752	5.42068	7.46147	0.545968	0.393233	0.357435	1.15725	1.98634	1.57871	Cx3cr1	none	none
ENSMUSG00000002265	Peg3	4899	85.5068	87.6434	83.1571	82.8544	83.2051	78.6508	42.5401	41.5679	29.5946	17.5451	13.48	12.5153	7.21067	9.92567	6.37884	6.43356	6.36755	5.28173	3.95545	3.14378	10.1389	10.8734	10.5603	5.14323	3.21412	2.20745	0.309814	0	0	none	none	none
ENSMUSG00000002266	Zim1	1740	0.241592	0.20745	0.200626	1.34377	0	0.848439	0	0.400805	0.322961	0.388965	0.952231	0.864715	0	0.144797	0.299329	0.282802	0.791385	0.3118	0.795188	0.199176	4.71293	5.74983	6.57467	1.11103	0.222392	0.0355613	0	0	0	none	none	none
ENSMUSG00000002274	Metrn	876	0.959747	0.206029	0.398503	0	0.366684	0	3.64139	1.9903	0.641499	142.674	155.907	201.601	2.33288	4.88939	3.86462	0.605425	0.166366	1.6281	7.38997	2.23132	6.21119	7.28566	9.2346	5.8802	6.72529	6.6896	4.8829	2.85013	1.77673	GFAP	none	none
ENSMUSG00000002279	Lmf1	1725	6.21415	7.21925	8.29719	4.87963	6.70362	8.55817	6.78037	9.90512	6.18962	26.8104	31.8341	34.4532	23.6939	27.4586	22.192	3.04326	2.94744	3.10853	5.00147	4.66949	9.00188	8.81858	8.52577	3.0635	4.26404	1.9554	2.59054	3.7956	2.96894	none	none	none
ENSMUSG00000002280	Ciao3	1479	17.3377	12.8131	15.342	12.9634	13.6826	16.4697	27.319	15.5607	14.0583	10.9825	10.7226	12.4621	13.4227	12.7762	11.2689	4.01474	3.94222	4.32044	3.631	3.75374	NA	NA	NA	NA	NA	NA	NA	NA	NA	none	none	none
ENSMUSG00000002289	Angptl4	1233	0.340932	0.146376	0.283122	0	0.260515	0	0	0.565613	0	18.2968	14.5896	16.7788	0	0	0.211205	0.329766	0.120137	0.249188	4.13382	0.0981524	NA	NA	NA	0.748461	1.92093	0.469994	0.584675	0	0.0727669	GFAP	none	none
ENSMUSG00000002297	Dbf4	1992	0.422057	0.634221	0.700982	0.704264	0.322505	1.11166	1.60133	0	0	1.35903	0.59412	1.03857	2.19836	2.02367	2.35316	0.665169	0.776365	0.617089	0.998008	1.67434	NA	NA	NA	0.485427	0.422233	0	0.103585	0.148527	0.351642	none	none	none
ENSMUSG00000002307	Daxx	2223	9.92775	7.79406	8.00879	7.57297	7.5138	5.64481	2.86986	5.80384	6.82534	4.87125	6.28212	7.61439	9.06165	7.48022	8.20024	3.25955	2.98377	2.62442	2.85916	3.20904	12.213	12.4764	12.1181	3.38405	3.33438	2.37198	2.96852	2.81136	2.27899	none	none	none
ENSMUSG00000002308	Cd320	783	19.0589	20.9755	16.9417	8.36122	13.948	16.9688	25.8013	26.275	23.6838	37.744	41.4145	59.329	5.96563	9.33138	10.6428	4.32135	3.81687	4.71443	5.55957	3.27002	9.90022	9.14238	10.1542	2.42223	3.5269	1.60874	1.92376	1.98431	1.23903	none	none	none
ENSMUSG00000002319	Ipo4	3249	9.18628	8.77686	11.1743	6.47688	11.2707	7.49729	10.4725	6.22488	2.07554	3.05521	1.96701	3.53112	4.22324	3.17939	2.24428	3.42122	3.23495	2.8595	1.94528	2.07575	13.6744	13.7041	13.8572	4.16189	3.79147	3.25424	2.77579	2.77706	2.59054	none	none	none
ENSMUSG00000002320	Tm9sf1	1821	12.004	13.38	12.6523	17.9759	16.9339	14.1872	20.4366	22.9786	20.0587	15.9815	18.1975	18.7972	24.8496	21.5836	15.5878	3.77387	4.11817	4.46975	4.22178	4.43787	11.4205	10.9453	11.729	3.65535	4.1088	1.20442	1.19252	1.89053	1.90682	none	none	none
ENSMUSG00000002324	Rec8	1776	0.82843	0.914601	1.57247	0	0	0.41562	6.58566	6.47924	7.59396	1.14324	1.33276	2.01207	0.328764	1.41862	0.879785	1.07394	0.187185	2.97935	1.31963	0.907447	8.086	7.74968	10.8244	1.97085	1.9684	1.38612	0.573161	0.221675	0	none	none	none
ENSMUSG00000002325	Irf9	1398	0.751733	0.645498	0.499412	0.669	0	0	0	1.24714	0.401969	5.64806	8.12695	6.59206	60.3516	39.8286	39.1183	0.706831	0.290424	0.631992	2.96144	5.56781	8.10252	7.95112	7.58284	2.11103	2.34104	2.62288	4.93928	5.68177	4.58047	Cx3cr1	none	none
ENSMUSG00000002326	Gmpr2	1047	18.6697	23.9607	27.3403	20.992	34.0543	33.1353	9.13998	17.9846	14.4916	25.4257	18.3118	22.2745	63.8538	54.1434	61.4354	4.60428	4.92571	3.89453	4.52381	5.92626	10.1326	10.5808	10.8321	3.55336	4.20633	3.21517	4.08187	4.80153	4.41065	none	none	none
ENSMUSG00000002329	Mdp1	495	50.5292	44.1176	47.2504	47.2355	43.4776	43.2447	49.4051	39.449	34.0577	19.1418	24.387	26.2166	50.7214	53.4434	52.0833	5.59392	5.51262	5.39131	4.59982	5.73017	13.0714	13.4273	13.0451	4.22188	3.92347	5.27706	5.37879	4.67028	4.6898	none	none	none
ENSMUSG00000002332	Dhrs1	942	83.4491	72.2308	70.0401	46.6638	61.7196	45.4482	67.7251	47.752	40.5656	172.912	153.778	201.452	52.0662	54.5618	40.0853	6.25248	5.70811	5.72831	7.46799	5.6411	13.2028	13.3161	13.8618	5.11936	6.56194	3.38224	3.64108	3.39271	2.78906	none	none	none
ENSMUSG00000002341	Ncan	3807	73.2637	59.07	65.5631	74.6834	58.0499	60.8817	6.98243	11.3577	6.93769	224.355	243.288	235.403	3.29749	5.75766	4.58311	6.06535	6.03427	3.23664	7.87866	2.47147	NA	NA	NA	4.70377	6.57622	2.52326	1.07241	0.263379	0.0426253	GFAP	none	none
ENSMUSG00000002342	Tmem161a	1443	10.0504	6.50383	6.28989	7.45358	5.34245	3.0692	9.57914	4.10805	3.5049	6.40997	7.05335	11.8606	4.24865	5.93639	6.85781	3.1068	2.6527	2.75076	3.23899	2.74005	10.0343	9.77914	9.85173	2.88753	3.3627	1.86411	2.33918	2.36052	2.04245	none	none	none
ENSMUSG00000002343	Armc6	1407	33.0141	29.3747	24.0665	21.6034	24.1996	25.1818	21.9156	15.3656	9.18615	7.53602	8.57965	7.8866	6.0173	2.86507	4.81224	4.89813	4.62419	4.04344	3.17005	2.47635	12.3759	12.3655	11.9805	3.49057	3.43385	2.32883	1.24355	1.26363	0.768258	none	none	none
ENSMUSG00000002345	Borcs8	363	28.372	33.312	25.0036	25.7648	20.3525	38.6355	20.5041	45.1486	21.6731	30.4528	34.5591	45.594	29.7573	29.1509	27.2612	4.90187	4.87041	4.9121	5.24293	4.89351	NA	NA	NA	4.01078	3.57934	4.13706	3.02799	1.18575	0.871739	none	none	none
ENSMUSG00000002346	Slc25a42	957	19.1077	13.5785	13.4966	8.30693	14.4329	7.71308	15.5548	10.2023	10.5696	9.42945	9.39864	16.1151	1.5253	3.15921	1.6327	4.03512	3.4791	3.71248	3.66081	1.63494	10.1543	10.436	10.3219	2.97085	2.47335	1.25729	0.649436	0.0928261	0.277546	none	none	none
ENSMUSG00000002365	Snx9	1788	3.52659	4.13855	5.07624	2.87692	5.20986	2.06416	1.78403	3.12036	2.82862	7.82281	8.47239	5.57494	35.2683	26.9138	20.9731	2.39153	2.13213	1.83902	3.05138	4.8439	8.11627	8.41253	8.31452	2.36737	3.12433	0.0105006	0.0134646	0.00982862	0.0604844	Cx3cr1	none	none
ENSMUSG00000002372	Ranbp3	1677	58.7815	55.3174	53.0815	56.6065	53.4401	36.0928	47.553	41.5862	44.2324	30.4028	30.3458	27.4767	40.5621	32.3009	31.6785	5.82596	5.63555	5.50644	4.9264	5.16379	12.9726	13.1476	12.6551	4.83289	4.96224	1.74026	1.85324	1.60046	1.45281	none	none	none
ENSMUSG00000002379	Ndufa11	432	217.483	213.904	156.767	165.619	182.171	116.189	339.66	337.4	188.618	155.1	214.781	258.168	92.5837	71.1518	59.6787	7.62243	7.28225	8.17772	7.71665	6.23786	13.3739	13.724	14.783	4.48414	4.78171	6.45302	6.34268	4.42865	3.95238	none	none	none
ENSMUSG00000002384	Bmp8b	1200	0	0	0	0	0	0	0	0	0	0	0	0	0	0	0	0	0	0	0	0	NA	NA	NA	0.0565835	0.0191088	0	0	0	0	none	none	none
ENSMUSG00000002393	Nr2f6	1173	5.91312	4.00044	2.97604	4.78395	3.01225	5.03422	11.7841	9.21545	4.79073	3.65421	3.63218	4.97045	3.73328	3.65141	4.88419	2.40505	2.39966	3.26255	2.34642	2.34756	11.2191	11.4989	12.0511	3.55336	3.27401	3.83571	4.02025	3.63083	2.58274	none	none	none
ENSMUSG00000002395	Use1	855	20.4039	24.4863	21.2311	26.253	18.7845	18.9931	28.603	35.4818	44.6933	23.4835	27.1302	37.1751	39.6086	30.6462	43.555	4.5261	4.48179	5.21953	4.91948	5.28306	11.8482	12.1375	12.8948	5.6837	5.51874	5.86614	6.93234	5.6605	5.44034	none	none	none
ENSMUSG00000002396	Ocel1	660	2.22923	4.3753	4.7603	8.50238	1.94676	1.1184	1.61104	1.585	1.70289	0.683635	2.86906	2.56467	1.76935	4.19912	5.52398	2.25951	2.27972	1.39669	1.60365	2.27227	11.5496	11.3553	10.7812	1.28688	0.91584	0.868701	1.14338	1.26189	1.17263	none	none	none
ENSMUSG00000002409	Dyrk1b	2070	7.41231	6.27761	6.57704	7.22908	6.05188	5.34885	4.62298	5.39054	3.80065	3.37855	3.54474	3.36174	1.55139	2.19085	2.76771	2.95525	2.84999	2.48664	2.14677	1.66447	11.338	11.3796	11.1459	3.1635	2.27699	2.31867	1.51443	1.39821	1.2577	none	none	none
ENSMUSG00000002413	Braf	2415	67.4506	64.5697	67.3604	91.5898	92.3077	98.1133	52.834	53.5685	58.1732	19.8042	17.9361	13.5508	12.0887	12.1018	10.8911	6.07597	6.56991	5.80371	4.17768	3.66606	11.3389	11.8098	10.8851	3.84599	2.64155	0.608789	0.169338	0.218225	0.537726	none	none	none
ENSMUSG00000002416	Ndufb2	318	97.1608	80.0247	92.2122	114.702	66.6673	58.03	257.462	176.543	208.523	102.868	87.0868	93.4463	34.8863	34.8606	30.3	6.50461	6.33628	7.74938	6.57693	5.10219	13.4136	13.9023	14.7378	6.56621	6.59952	4.90857	3.65471	2.83976	1.99293	none	none	none
ENSMUSG00000002428	Hltf	3012	10.0487	9.64724	12.0535	11.0232	13.1173	18.8702	6.70731	4.97813	4.47771	2.62151	3.30056	3.5592	27.3333	18.5698	24.0358	3.53396	3.93893	2.6753	2.05673	4.60365	10.4701	10.6183	10.4253	2.14405	1.6198	0.675505	0.58347	1.17529	1.56636	none	none	none
ENSMUSG00000002455	Prpf6	2826	36.7414	36.8498	29.6466	32.9294	33.0763	35.784	22.9513	16.1641	19.0897	11.0165	9.21327	12.778	22.9339	16.0476	15.4812	5.14619	5.12639	4.35062	3.58527	4.25959	11.8363	11.9588	11.9951	4.39643	4.81489	1.02698	0.889861	0.719147	0.756535	none	none	none
ENSMUSG00000002458	Rgs19	732	22.3967	22.1903	19.5528	30.6643	26.7679	19.1594	8.71545	3.33457	1.53539	4.00655	7.11386	8.99268	132.81	124.253	133.41	4.48413	4.72958	2.46688	2.94568	7.03516	11.6932	12.2562	9.77538	3.02148	2.17845	2.00936	4.73095	5.39702	5.42673	Cx3cr1	none	none
ENSMUSG00000002459	Rgs20	1119	25.3574	26.1286	24.0213	5.43271	4.59289	3.95787	0.95021	4.05104	3.01315	84.4739	83.9757	92.7772	1.82627	2.70185	3.02539	4.70979	2.5011	1.87636	6.46067	1.81469	12.9421	10.5745	10.0939	4.0635	5.66997	0.15747	0.0401753	0	0.0037354	GFAP	AS	none
ENSMUSG00000002475	Abhd3	1236	13.4341	12.9958	10.4501	9.8369	9.61566	11.944	199.581	241.495	229.146	449.739	468.224	490.731	15.1168	16.715	16.6447	3.73263	3.51923	7.80998	8.87825	4.10088	9.85335	9.40614	12.7256	5.0505	7.30049	0.603706	0.20771	0.223302	0.154385	none	none	none
ENSMUSG00000002477	Snrpd1	360	103.341	131.852	151.272	135.093	160.607	198.888	150.632	164.664	199.805	107.786	94.6789	77.3199	73.7967	62.9868	62.9339	7.02038	7.37385	7.43213	6.5586	6.07836	12.5654	13.079	12.7791	4.30451	4.70671	3.9794	4.12679	2.53485	2.22798	none	none	none
ENSMUSG00000002486	Tchp	1494	2.67303	2.41608	3.73857	3.75607	2.36504	0.494071	2.84681	2.33401	3.7614	2.56706	1.74275	0.88121	2.34492	2.69823	2.78893	1.97913	1.68035	1.99304	1.44908	1.85228	NA	NA	NA	2.07039	2.39872	1.21862	0.729908	0.713228	2.13847	none	none	none
ENSMUSG00000002489	Tiam1	4776	25.877	30.3825	27.4827	26.1427	24.5485	20.2464	41.4093	22.7794	24.356	4.81808	4.75774	2.55965	6.17383	5.80281	5.12545	4.8537	4.62327	4.93144	2.3349	2.74431	12.8934	12.6261	12.8542	4.5741	3.61432	0.469538	0.113572	0.0868417	0.0889134	none	none	none
ENSMUSG00000002496	Tsc2	5427	30.5188	27.6359	23.5428	24.9886	24.8591	20.674	24.2947	19.0189	16.4641	17.9166	16.6172	18.9566	15.9232	15.8309	16.0271	4.81928	4.61513	4.38722	4.23497	4.08126	13.8632	14.0483	13.8626	4.05485	4.07667	1.81703	1.62608	1.02339	1.13349	none	none	none
ENSMUSG00000002500	Rpl3l	1224	0	0	0	0	0	0	0.868697	0.284886	0	0	0	0	0	0.205839	0	0	0	0.469394	0	0.0957396	NA	NA	NA	0.163499	0.154886	0	0.0394426	0	0	none	none	none
ENSMUSG00000002504	Slc9a3r2	1014	9.94957	6.22963	8.26246	1.8447	6.65238	2.18385	51.3816	33.0131	27.7097	6.22958	5.6023	4.82245	1.72747	3.72703	4.87959	3.19333	2.18913	5.26184	2.71181	2.15209	11.2791	10.7242	13.0238	4.2555	3.82511	2.43625	1.41569	0.281465	0.500208	PV	none	Olig
ENSMUSG00000002524	Puf60	1695	125.863	128.094	121.924	110.631	97.4068	97.548	97.8598	127.343	103.771	101.154	114.788	106.853	98.6922	92.455	87.8809	6.98064	6.68457	6.78996	6.76286	6.55473	15.0397	15.2701	15.0338	6.0917	6.7421	4.92162	4.42236	4.49779	3.26846	none	none	none
ENSMUSG00000002546	Golga2	3081	27.97	30.5195	30.2521	28.3827	28.3578	30.4265	25.8833	27.7286	25.1702	16.9877	14.5967	15.9324	25.8684	18.1539	20.032	4.93454	4.90956	4.76875	4.07373	4.4823	13.5624	13.6702	13.803	4.40599	4.46684	2.33346	2.32563	1.64928	1.72826	none	none	none
ENSMUSG00000002550	Uck1	852	7.89426	7.62597	3.27783	4.93976	8.29428	1.73273	4.99195	8.59474	4.61698	5.56055	6.94535	13.4655	8.22374	5.61854	5.8074	2.86117	2.5823	2.82128	3.27159	2.91646	10.627	10.9183	10.478	2.8679	3.21826	3.73382	3.58807	3.31265	2.76264	none	none	none
ENSMUSG00000002565	Scin	2148	0.0978513	0.0840229	0	0.435411	0.448624	1.71821	0	0.487012	0	0.315083	0.330583	0.350234	0	0.234588	0.121237	0.0849143	0.901042	0.217029	0.413558	0.161705	NA	NA	NA	0.0565835	0.0658021	0	0.00797465	0.0234903	0	none	none	none
ENSMUSG00000002578	Ikzf4	2061	2.44756	2.27681	2.03254	2.94964	1.55854	0.358147	1.03181	1.86109	1.09064	0.547306	0.689075	0.365018	0.283302	0.24449	0	1.70146	1.39073	1.219	0.61711	0.233803	10.8261	10.3195	11.2472	1.91073	0.874469	0.602979	0.183184	0	0	none	none	none
ENSMUSG00000002580	Mien1	348	147.975	159.218	162.507	150.502	107.995	93.3283	116.106	162.326	176.014	132.248	148.276	202.668	107.381	86.1544	94.2886	7.29982	6.886	7.25249	7.34042	6.59904	13.5597	13.6335	13.6075	6.1807	6.18547	7.64834	7.16059	7.00834	6.04678	none	none	none
ENSMUSG00000002588	Pon1	1068	0	0	0	0	0	0	0	0	0.526173	0	0	0	0	0	0	0	0	0.233141	0	0	NA	NA	NA	0	0	0.100855	0	0.200104	0	none	none	none
ENSMUSG00000002602	Axl	2667	0.788094	0.744392	0.785352	0.17534	0.120441	0	0.398682	0.522986	1.26424	99.0541	115.731	110.292	29.1177	18.1379	16.99	0.825877	0.135658	0.789633	6.77293	4.48641	4.58855	5.85044	7.16993	3.41954	6.0534	0.632056	1.941	1.19184	1.22482	GFAP	none	Micro_1
ENSMUSG00000002603	Tgfb1	1173	0.716742	0.153863	0.297604	0	0	0	3.62586	5.05363	7.1861	1.73094	2.62324	1.2827	174.967	207.271	185.155	0.474465	0	2.65272	1.52555	7.57085	NA	NA	NA	1.58496	0.884923	2.73321	6.61852	7.25517	7.06161	Cx3cr1	none	none
ENSMUSG00000002608	Ccdc97	1023	39.8591	33.6969	30.3704	27.8842	29.2014	20.2033	41.5752	31.7001	32.4098	19.4064	21.9807	25.9224	58.7881	54.4285	56.2581	5.15551	4.74216	5.17905	4.55069	5.84528	11.6861	11.7791	11.812	4.30305	4.42761	2.74422	3.81405	3.53951	3.36593	none	none	none
ENSMUSG00000002617	Zfp40	2391	4.65905	6.94449	7.30006	6.06297	7.79191	7.10049	0.889406	1.60423	1.6452	3.58544	3.16784	2.43845	3.17462	3.79344	2.50505	2.86813	2.99731	1.25073	2.02287	2.05579	10.8109	9.86419	9.14198	1.79077	1.05195	0.420179	0.015277	0.428603	1.10285	none	none	none
ENSMUSG00000002625	Akap8l	1926	18.1156	19.3975	15.5876	18.6955	20.8473	9.96453	3.31241	4.52623	5.83544	4.09968	2.58081	3.71073	13.9453	13.4738	7.16618	4.22498	4.12948	2.47457	2.15825	3.64714	12.6327	12.4727	12.6667	3.76977	3.90175	3.26088	2.20698	2.56186	3.94136	none	none	none
ENSMUSG00000002633	Shh	1314	3.51907	2.19764	1.85968	0	0.244456	0	26.7035	33.1717	33.3579	0.858446	0.72054	1.00192	0.444357	0.191741	0.990929	1.81781	0.113014	5.0035	0.895538	0.625123	8.30247	6.18843	11.6131	1.35614	0.271027	0.362166	0.117441	0	0	PV	none	none
ENSMUSG00000002635	Pdcd2l	1095	16.1238	17.8009	13.0709	23.0613	12.9073	12.8079	21.3628	13.0564	7.69798	9.27122	5.83637	8.2444	13.3307	10.5841	11.4155	4.05877	4.10926	3.91064	3.13488	3.67545	11.2124	11.6007	11.2561	3.32769	3.49484	1.72167	2.1804	2.50424	1.93311	none	none	none
ENSMUSG00000002658	Gtf2f1	1527	41.9819	49.523	45.4936	53.2861	43.7542	35.7711	27.8529	30.8282	26.1288	17.2856	17.5159	15.3958	30.3988	20.6244	19.7828	5.5443	5.5005	4.87135	4.14832	4.6207	12.4844	12.5321	12.4186	4.73444	5.23164	4.16368	3.5941	3.49359	3.11311	none	none	none
ENSMUSG00000002660	Clpp	819	13.6017	20.7146	17.4758	22.8391	23.9244	13.5191	35.0533	42.5764	22.6428	36.0849	33.5249	49.143	14.615	13.8433	13.0367	4.19093	4.39878	5.10535	5.34285	3.89061	12.1964	12.9005	13.7659	5.0063	5.65745	4.43265	4.03454	3.55044	3.29695	none	none	none
ENSMUSG00000002661	Alkbh7	666	25.8786	25.2023	18.3455	16.8516	22.186	5.54161	54.2818	50.2632	21.0943	26.7603	24.8781	34.1699	17.9725	12.4839	13.6855	4.59348	3.9873	5.42222	4.88766	3.97397	10.8457	11.236	12.1765	3.90689	4.74595	6.11135	5.30089	5.25002	4.03259	none	none	none
ENSMUSG00000002664	Pspn	471	0	0	0	0	0	0	0	0	0	0	0	0	0	0	0	0	0	0	0	0	NA	NA	NA	0.748461	1.11103	0	0	0	0	none	none	none
ENSMUSG00000002668	Dennd1c	2361	0	0.152885	0.147856	0	0	0	0	0	0	0	0	0	10.1395	12.9122	16.9861	0.137828	0	0	0	3.84257	5.42638	3.00896	6.59837	0.189034	0.102098	0.385514	2.35534	3.21523	3.74878	Cx3cr1	none	none
ENSMUSG00000002679	Med6	741	47.3695	41.4059	36.7462	41.0203	55.4865	60.7647	54.5274	41.4111	28.0597	27.7052	27.1515	19.7974	29.1549	20.4006	20.032	5.42091	5.73941	5.4037	4.69403	4.59669	11.3948	11.907	11.2489	3.57289	3.73408	0.603951	0.734578	1.19569	1.57859	none	none	none
ENSMUSG00000002688	Prkd1	2757	1.37226	0.720092	1.13957	1.35693	2.09716	1.07093	1.54267	1.39126	0.815311	13.1743	12.1912	16.0311	0.317674	1.09662	0.566738	1.05472	1.32673	1.16976	3.88741	0.731481	8.47509	9.52775	7.58256	1.79909	3.85266	0.0291615	0.00590394	0	0	GFAP	none	none
ENSMUSG00000002699	Lcp2	1602	1.04961	1.35192	0.217908	0.875714	0.601526	0	0	0.217666	0	0.704119	0.591005	0.704402	179.321	133.994	140.124	0.905463	0.577647	0.101052	0.736829	7.24932	7.6341	7.48482	5.66179	0.678072	0.415037	0.230056	0.756397	1.79696	1.84744	Cx3cr1	none	none
ENSMUSG00000002718	Cse1l	2916	96.5148	113.327	116.363	73.9293	89.9975	108.089	91.5242	106.787	134.707	51.4485	42.6153	36.1187	56.2661	44.7561	48.4932	6.77788	6.51841	6.80743	5.4723	5.66785	12.438	12.1902	12.2645	4.45418	4.01792	0.531813	0.409925	0.899455	1.22794	none	none	none
ENSMUSG00000002728	Naa20	567	72.2857	71.6195	51.7169	38.7631	43.6218	61.1864	60.009	74.4141	61.4481	27.8518	17.5331	22.8875	22.1403	24.8837	31.6909	6.04892	5.6105	6.05073	4.57031	4.76756	12.8253	12.9605	13.9213	4.01436	3.50758	1.90153	1.28595	1.68472	2.14208	none	none	none
ENSMUSG00000002731	Prkra	942	20.5276	16.2855	16.6762	40.2103	21.8235	19.5898	74.4976	48.1222	43.5484	46.4611	41.711	34.1411	49.8968	28.8857	32.6211	4.23494	4.81803	5.81735	5.38443	5.25303	10.0549	10.9003	12.285	3.37851	3.94111	1.50278	0.697677	1.3325	1.30085	none	none	none
ENSMUSG00000002732	Fkbp7	657	4.1589	3.57117	6.37605	13.5236	12.2228	14.6055	9.71036	13.2687	18.8173	24.7232	23.4175	26.05	88.4271	77.4633	98.6966	2.51148	3.85306	3.90035	4.68539	6.4789	6.37587	7.65954	7.91733	1.73118	2.41864	0.314981	0.213847	1.81673	1.59097	Cx3cr1	none	none
ENSMUSG00000002733	Plekha3	894	11.05	8.07522	7.8096	16.2154	12.9348	6.6053	21.4084	21.4525	13.8288	12.6174	14.2972	14.7263	10.7764	8.17279	13.3995	3.31879	3.69137	4.31445	3.89533	3.55862	10.8758	11.7951	11.5056	3.74846	2.81284	1.13532	0.764459	0.841748	0.877968	none	none	none
ENSMUSG00000002741	Ykt6	597	111.958	109.74	107.592	95.5628	87.1639	68.003	76.585	60.1611	47.0647	86.1587	81.6745	96.0854	181.914	184.424	227.701	6.79133	6.40219	5.96047	6.47529	7.63672	14.4274	14.2985	13.9857	5.20477	5.28516	4.11827	5.14045	3.98979	4.04567	none	none	none
ENSMUSG00000002748	Baz1b	4440	44.2619	40.527	41.4347	38.4426	41.9605	34.9121	21.7925	20.1053	16.4536	14.1254	12.2614	13.9362	35.112	23.8896	26.3349	5.42876	5.30153	4.35406	3.8521	4.87998	10.8391	10.9618	10.5522	4.32481	3.98368	1.3132	1.3244	0.997478	1.24539	none	none	none
ENSMUSG00000002763	Pex6	2946	5.35093	4.34968	4.85833	5.23823	3.4891	4.51003	4.3311	2.36728	2.09826	2.98655	2.00863	4.97959	3.27024	3.42087	1.50274	2.54917	2.43628	1.97534	2.11268	1.89967	13.1342	13.6992	12.5838	4.07039	4.77891	3.86139	3.24583	3.31594	2.76337	none	none	none
ENSMUSG00000002767	Mrpl2	921	42.6759	44.4834	36.0081	53.313	43.2472	40.0729	50.7975	42.4044	42.1007	37.9674	41.6341	30.0186	29.4796	28.9972	33.3649	5.39423	5.54053	5.52672	5.23036	4.98249	12.3287	12.6849	12.7736	4.65306	4.99095	4.7219	5.08843	4.40311	4.05851	none	none	none
ENSMUSG00000002768	Mea1	525	84.8746	94.194	87.106	105.106	86.881	92.795	125.569	79.703	81.3494	83.3644	73.9398	87.4103	78.9636	78.2237	76.8848	6.48744	6.58387	6.59306	6.36757	6.30422	13.6511	13.7931	14.2322	6.00225	5.72101	5.77749	5.09441	4.64226	4.26005	none	none	none
ENSMUSG00000002769	Gnmt	882	0	0.409254	0	1.06039	0.364189	0	1.20554	1.97676	0.637135	0	0.805093	0.213237	0	0	0	0.184494	0.560577	1.18469	0.421634	0	NA	NA	NA	0.765535	0.85333	1.51541	0.469167	0.771468	0.520705	none	none	none
ENSMUSG00000002771	Grin2d	3972	0.15875	0.136315	0.0878875	0.235464	0.0808698	0.557509	5.3539	5.70633	2.54661	0.511177	0.774689	0.520853	0.220501	0.317154	0.393378	0.17332	0.368803	2.46874	0.68009	0.389946	7.05576	6.73925	12.5754	2.28096	1.11548	0	0	0	0	PV	none	none
ENSMUSG00000002778	Kdelr1	639	103.283	134.725	102.159	98.7953	114.109	100.498	114.815	144.064	139.829	148.635	163.725	199.849	134.778	141.942	130.819	6.83781	6.72066	7.06504	7.42405	7.09642	12.0234	11.5285	11.948	5.34979	5.85947	2.69264	4.37581	3.76675	3.29122	none	none	none
ENSMUSG00000002781	Tmem143	1377	15.4166	16.6457	13.4363	10.188	8.39778	5.89656	19.3044	13.6745	9.79438	9.83005	15.6423	15.8437	7.20847	8.59951	7.37562	4.01491	3.19547	3.93147	3.88479	3.12563	9.77862	10.0806	10.4039	3.34483	3.58095	3.21556	3.26279	2.9966	2.8566	none	none	none
ENSMUSG00000002797	Ggct	567	19.2762	20.0535	18.4703	42.0621	45.8879	49.4698	15.0023	28.2897	28.7419	12.7323	7.5142	10.6145	5.1489	5.77657	6.43003	4.34104	5.54864	4.64451	3.49659	2.76238	11.6465	12.1021	11.9204	3.16027	2.42939	2.38267	0.790739	1.16498	0.513148	none	none	none
ENSMUSG00000002799	Jag2	3744	3.14379	3.03694	2.05127	4.37155	5.23347	2.16869	1.70398	2.23526	1.65104	0.843588	0.632205	0.502338	1.55952	2.22069	1.94756	1.90458	2.3	1.51774	0.730642	1.54065	NA	NA	NA	2.36177	0.9855	0.381849	0.339903	0.389457	0.507369	none	none	none
ENSMUSG00000002803	Btbd6	1620	14.4015	11.475	11.8518	17.3197	18.0436	15.0362	11.8143	7.10316	4.5095	5.4311	5.40605	4.29555	4.86571	8.55377	5.62628	3.763	4.15379	3.13897	2.59556	2.87747	9.79901	10.1698	9.91507	4.70708	3.81079	4.66959	3.97247	3.24789	2.83779	none	none	none
ENSMUSG00000002804	Nudt14	669	16.3372	16.996	9.39253	11.883	12.9638	9.93016	15.8936	15.6368	3.35996	10.791	9.90662	9.27726	20.5102	20.3366	23.3557	3.92997	3.65447	3.6588	3.45833	4.48548	10.0575	10.436	10.6315	2.57046	2.68407	2.39242	2.90822	2.86227	2.18473	none	none	none
ENSMUSG00000002808	Epdr1	675	365.566	435.027	485.622	336.694	331.684	367.431	439.491	603.898	606.076	420.117	415.886	365.563	21.1929	23.1418	18.5185	8.74731	8.43575	9.10544	8.64933	4.45622	14.195	13.9157	14.7652	5.88411	5.8505	1.30378	0.474847	0.323404	0.0350077	none	none	none
ENSMUSG00000002812	Flii	3816	16.0833	13.7158	9.97136	8.57814	10.6062	10.6388	23.127	19.4636	14.1372	15.6666	12.5916	20.8973	38.176	27.9281	32.4155	3.83358	3.45168	4.31537	4.11979	5.08065	12.4995	12.4358	13.8404	3.82375	4.43652	2.80586	3.31161	3.04873	2.99258	none	none	none
ENSMUSG00000002814	Top3a	3012	1.81434	1.19841	1.15899	1.70782	0.959806	2.2056	0.706032	1.85233	0.746285	2.69641	1.88603	1.9357	6.49408	7.11007	9.68347	1.25736	1.39199	1.07145	1.66572	3.13135	8.26017	9.04471	9.03228	1.26303	1.34483	0.263693	0.598432	0.741064	0.641224	Cx3cr1	none	none
ENSMUSG00000002820	Atg4d	1425	3.09746	4.43287	2.9397	1.31265	3.1558	3.10797	8.20781	6.36226	5.52094	2.53305	2.82376	2.24371	1.22923	2.29847	2.01023	2.16672	1.81782	2.9443	1.8211	1.50892	11.1704	11.2373	12.6108	3.76341	3.26103	2.67135	1.98913	1.7893	1.57684	none	none	none
ENSMUSG00000002825	Qtrt1	1212	3.98865	5.95648	6.62463	5.40168	6.09566	3.65417	7.01838	3.45248	0.927315	2.97821	1.75765	2.63802	4.81754	3.94967	3.6527	2.70559	2.59706	2.26285	1.78992	2.36176	9.6335	10.2818	9.78839	2.1635	2.19954	1.11974	1.38485	1.50545	1.89369	none	none	none
ENSMUSG00000002831	Plin4	4806	0	0	0.0726361	0	0	0	0	0.145111	0	0.704119	0.837257	1.09574	0	0.157271	0	0.0345144	0	0.0681482	0.909994	0.0737154	NA	NA	NA	0.238787	0.804604	2.60235	0.578252	0.18204	0	GFAP	none	none
ENSMUSG00000002833	Hdgfl2	2037	57.0604	55.6417	49.5271	50.0459	50.1455	35.8744	30.7971	30.1283	22.3457	19.7137	17.8946	16.804	20.9247	16.9449	20.5827	5.78336	5.53466	4.84584	4.25833	4.35643	13.8689	13.9022	13.4701	NA	NA	NA	NA	NA	NA	none	none	none
ENSMUSG00000002835	Chaf1a	2736	1.53644	1.05545	2.16905	1.36734	1.29143	1.07915	2.72039	0.764694	1.02696	1.15438	0.951634	1.09986	2.13409	0.46043	0.475907	1.37127	1.16734	1.32424	1.04867	1.01683	9.68849	9.62944	8.85805	1.34483	1.34483	0.240973	0.253286	0.034663	0.0681893	none	none	none
ENSMUSG00000002844	Adprh	1089	145.913	155.953	169.896	141.706	155.446	161.32	176.726	158.821	123.846	116.839	117.371	116.403	131.093	125.395	128.654	7.3061	7.26514	7.26801	6.88107	7.01548	12.998	12.7113	13.0844	6.02768	6.33032	3.75424	4.00636	4.54916	3.40368	none	none	none
ENSMUSG00000002845	Tmem39a	1461	0.575454	1.11179	1.19469	0	2.41846	0	0	0.716018	2.69245	0.772073	1.29608	1.93096	5.39525	3.10407	3.20841	0.97133	0.852919	1.09502	1.22221	2.29354	8.2649	7.76561	8.63771	1.69599	1.0048	0.140902	0.186956	1.05419	1.12559	none	none	none
ENSMUSG00000002846	Timmdc1	858	22.0473	20.8248	30.1079	21.256	21.3395	25.8092	47.0919	31.7001	30.783	21.0349	20.4145	24.5506	13.9506	16.1505	12.4441	4.66259	4.57298	5.22978	4.52356	3.92427	10.5341	10.7027	11.0849	3.29278	3.14731	0.468846	0.455369	0.416703	0.52305	none	none	none
ENSMUSG00000002847	Pla1a	1371	0	0.263284	0	0	0	0	0	0.25434	0	0	0	0	0.212942	0	0.189946	0.121362	0	0.117403	0	0.181797	NA	NA	NA	0.485427	0.0379679	0.0704733	0.00801738	0.0468507	0.0370137	none	none	EndoSM
ENSMUSG00000002870	Mcm2	2715	2.55473	2.06074	1.67151	1.55016	2.24791	1.63125	2.3498	1.66965	0.827923	1.91116	0.958995	1.59327	9.78519	6.49588	6.71423	1.63025	1.49045	1.38725	1.31488	3.11522	9.03287	9.44096	8.5742	1.37851	1.71076	0.889704	1.51638	1.33875	1.19987	Cx3cr1	none	none
ENSMUSG00000002871	Tpra1	1110	10.4146	12.1947	10.3783	9.26836	9.83902	7.31492	22.032	20.4194	15.6942	9.55242	14.0739	13.8939	16.0437	14.9807	16.8919	3.58446	3.29388	4.34921	3.75561	4.08509	10.265	9.81127	10.7868	3.62527	3.35426	2.82903	2.78285	3.53958	3.38677	none	none	none
ENSMUSG00000002881	Nab1	1461	6.76159	5.92957	6.2124	8.32198	5.27663	9.09415	10.9167	16.9458	14.2315	14.8238	15.877	19.4383	13.9877	13.6234	15.5073	2.86813	3.09833	3.9099	4.14674	3.94231	9.24732	9.57372	9.76756	2.80735	2.51602	0.473319	0.423865	0.366609	0.629787	none	none	none
ENSMUSG00000002885	Adgre5	2457	0.427726	0.220368	0.426238	0	0	0	0	0.425764	0.45743	17.9966	18.3038	19.4429	4.15873	7.07544	6.25338	0.441601	0	0.372281	4.29139	2.77171	NA	NA	NA	1.35614	2.54597	0.358785	0.263476	0.425642	0.129481	none	none	none
ENSMUSG00000002897	Il17ra	2595	10.8535	10.9888	11.7036	5.58634	4.45616	1.99113	0.819487	0.806244	0.866208	9.91074	10.7631	14.4227	42.1883	51.0691	48.6712	3.60667	2.32516	0.872353	3.66663	5.59424	9.73641	7.66766	6.07748	2.86394	3.28688	1.32739	3.04788	3.94335	4.29357	Cx3cr1	none	none
ENSMUSG00000002900	Lamb1	5505	4.00897	3.63913	3.55113	17.499	17.3882	16.6266	18.156	17.9259	17.8641	1.43433	2.92378	0.888276	0.68942	0.732272	0.709581	2.24278	4.18359	4.24656	1.4588	0.774354	10.3646	10.9848	11.2665	2.0072	1.39689	0.128379	0.124689	0.0389107	0.0185925	none	none	none
ENSMUSG00000002908	Kcnn1	1746	4.57446	3.41116	3.59886	4.01745	2.02369	6.34143	4.26288	3.59485	1.28741	2.06735	1.35566	2.58523	0.334413	0.2886	0.894901	2.2814	2.35826	2.01734	1.58628	0.590694	10.4922	10.292	10.4985	2.42223	1.87971	1.40584	0.855221	0.105892	0.025999	none	none	none
ENSMUSG00000002910	Arrdc2	1224	2.40407	3.53885	1.71122	3.43846	0.262431	1.20611	0	0	1.37734	3.31764	3.48084	3.99507	1.43109	2.88175	3.19138	1.82838	1.39817	0.54509	2.20096	1.80793	8.863	8.72675	7.60199	2.18269	3.32865	2.6147	2.3666	2.36992	2.04595	none	none	none
ENSMUSG00000002930	Ppp1r17	480	0	0	0	0	1.3384	9.22677	1583.85	1929.48	2521.76	10.81	7.88991	7.05283	9.12321	8.39825	10.3081	0	2.17687	10.9749	3.26066	3.36128	NA	NA	NA	5.04002	0.931053	1.45226	1.34864	0.141069	0	PV	none	none
ENSMUSG00000002944	Cd36	1419	0.592487	1.65346	0.984042	0.32955	0.679101	2.08074	0.74932	1.72016	1.9801	3.97462	1.66806	2.65082	89.702	73.6844	62.3971	1.05427	1.02134	1.3122	1.91246	6.25288	NA	NA	NA	0.333424	0.0840643	0	0.0699764	0.0471534	0	Cx3cr1	none	Macrophage
ENSMUSG00000002948	Map2k7	1407	0.29877	1.02619	0.744326	0.33236	0.684893	0	0	0	0.399398	0.160341	0.504685	0.534685	0	1.25347	0.740345	0.75682	0.421247	0.180317	0.485328	0.73518	12.2678	12.5802	12.9742	4.5472	4.35332	3.85945	3.45554	1.75773	2.59504	none	none	none
ENSMUSG00000002949	Timm44	1359	28.303	30.2794	24.9166	30.6248	34.5087	26.6144	18.7777	36.1787	27.7048	10.9563	11.4952	12.7321	21.4822	17.7976	19.354	4.84965	4.98106	4.83561	3.66992	4.36069	12.525	12.4705	13.0287	3.8953	4.00899	2.01747	2.09275	1.49725	1.80364	none	none	none
ENSMUSG00000002957	Ap2a2	2817	184.443	188.554	174.359	171.979	202.284	184.994	191.746	175.526	174.75	60.9447	53.0195	49.2722	51.0926	51.1586	52.8783	7.51926	7.55013	7.50521	5.79213	5.72	NA	NA	NA	5.73498	5.16698	1.79593	1.55694	0.559431	0.509547	none	none	none
ENSMUSG00000002963	Pnkp	1569	8.03765	5.29135	5.56228	5.66284	4.29924	5.64545	5.42146	3.5559	2.86528	7.76442	6.78864	8.99022	15.4438	11.0799	14.2739	2.86732	2.63285	2.30671	3.14531	3.86782	10.7141	11.0319	11.2514	2.79077	3.69377	2.16442	2.94059	3.2923	2.47026	none	none	none
ENSMUSG00000002968	Med25	2406	9.6968	12.1521	6.96437	12.0503	7.87684	7.05622	11.0483	7.53634	5.60551	16.2214	22.135	21.4966	9.94984	6.59713	7.68477	3.40659	3.32113	3.18005	4.38895	3.18225	12.8126	12.9038	12.3486	4.46728	4.90849	3.61837	2.96386	2.35677	2.04359	none	none	none
ENSMUSG00000002980	Bcam	1869	2.24917	1.15879	1.49423	0.500408	0.171865	0.39494	1.70672	1.49257	0.601341	3.86259	4.68582	4.62893	0.937216	1.21323	0.836007	1.39729	0.439078	1.1807	2.43094	0.996739	8.25537	5.11712	7.45094	2.28688	2.96347	1.13197	0.233553	0.218883	0	none	none	none
ENSMUSG00000002981	Clptm1	1995	161.826	151.26	147.51	171.816	161.654	158.728	158.293	166.223	160.558	169.963	182.239	193.072	131.704	148.011	136.017	7.27176	7.3669	7.34599	7.51379	7.12492	14.1507	13.5288	14.2206	5.53481	5.85997	3.53825	3.3946	4.56134	3.1874	none	none	none
ENSMUSG00000002983	Relb	1677	1.75467	1.29146	2.08163	3.62505	2.87312	0.880312	1.26808	0.623794	0	1.47978	1.69372	0.78505	3.65581	4.20663	3.72689	1.43789	1.79056	0.705424	1.21382	2.28188	9.16836	10.1276	8.31734	1.70487	2.05658	0.714578	1.8712	1.56821	1.32659	none	none	none
ENSMUSG00000002984	Tomm40	1086	50.9011	47.1977	44.0379	43.4905	32.8314	28.5469	117.49	75.7766	54.8499	21.6044	22.8851	27.5359	22.85	21.8076	20.8621	5.59631	5.16817	6.38725	4.64434	4.51348	12.9646	13.3089	13.8363	5.30743	5.27227	6.89349	5.86468	5.70988	4.54256	none	none	none
ENSMUSG00000002985	Apoe	936	211.757	130.155	145.827	13.989	12.6976	24.447	301.037	189.252	163.903	27747.8	32925	30662.5	9019.04	7545.23	7972.74	7.35385	4.17349	7.77521	14.894	12.9979	10.0582	10.5521	12.927	9.97353	13.463	10.3029	11.6938	10.4142	8.9627	none	none	Macrophage
ENSMUSG00000002992	Apoc2	294	0	0	0	0	0	0	0	0	0	0	0	0	0	0	0	0	0	0	0	0	NA	NA	NA	0.214125	0.0565835	0.485535	0.58253	0	0.381006	none	none	none
ENSMUSG00000002996	Hbp1	1581	5.31776	6.39276	3.97445	9.46502	8.93957	8.40389	6.05285	5.95504	7.46427	20.9761	15.5702	19.5094	62.4141	43.5051	48.9207	2.63884	3.31269	2.9051	4.29904	5.71736	9.73051	10.4461	10.798	3.28983	3.48371	1.46092	1.81571	2.80311	2.49814	none	none	none
ENSMUSG00000002997	Prkar2b	1251	69.0535	74.2988	76.7382	36.633	44.6774	40.7129	50.1469	43.2043	31.8934	10.0988	7.94667	6.31428	4.66735	4.22933	3.747	6.21652	5.38109	5.41779	3.18902	2.38255	12.7505	12.0498	12.1136	3.97085	2.34293	0.332752	0.057895	0	0.0174323	none	none	none
ENSMUSG00000003031	Cdkn1b	594	53.0769	57.4258	60.5323	47.2355	48.6689	54.6772	200.485	144.998	184.479	114.699	121.138	109.869	93.3824	87.7998	87.6822	5.85827	5.6779	7.47293	6.8609	6.50178	12.356	12.532	12.0785	4.15866	4.41323	2.19571	1.56511	2.21535	3.04094	none	none	none
ENSMUSG00000003032	Klf4	1452	0	0	0	0	0	0.508362	0	0.240152	0	0.310743	0.163015	0.259057	1.80956	0.520552	1.97285	0	0.225835	0.111099	0.315302	1.28352	4.76307	4.0635	5.42749	1.17632	0.653824	1.69259	1.15549	2.32833	3.79302	Cx3cr1	none	EndoSM
ENSMUSG00000003033	Ap1m1	1272	58.3295	57.7483	55.1626	40.8074	60.8591	45.2634	30.093	39.4755	21.6476	26.249	28.0985	25.4316	34.1977	36.8414	31.3237	5.85997	5.64318	4.97294	4.78623	5.13426	13.1654	13.2405	13.2544	4.74308	4.63149	3.21243	2.371	2.62388	2.26683	none	none	none
ENSMUSG00000003037	Rab8a	624	54.2303	47.1449	57.0626	77.1891	64.8607	81.6215	71.5672	49.1757	60.3379	66.1614	67.5194	53.3483	131	113.861	121.027	5.74987	6.2395	5.93923	5.98511	6.94208	12.9163	13.0773	13.2736	4.22651	4.48886	2.10887	2.88736	2.33384	1.84817	none	none	none
ENSMUSG00000003038	Hmgn2	338	3.73109	3.20381	0	6.91762	2.85102	0	0	1.03166	0	2.66982	4.90202	7.79011	6.04615	3.72703	3.85231	1.72754	2.08957	0.426411	2.61368	2.47036	13.2666	13.2531	12.3008	1.60407	1.48886	0.410125	0.627241	0	0.411191	none	none	none
ENSMUSG00000003039	Fam32a	339	55.1812	54.3041	58.6964	117.253	94.7537	71.8545	103.506	87.4323	111.064	61.8902	81.692	51.0411	130.039	94.3874	121.374	5.83442	6.57924	6.66771	6.04165	6.8613	14.0204	14.321	14.3102	5.26228	4.87938	4.37041	4.86799	4.2405	3.92169	none	none	none
ENSMUSG00000003051	Elf3	1176	0	0	0	0	0	0	0	0.593028	0.477851	0	0	0	0	0	0	0	0	0.440378	0	0	NA	NA	NA	0.0565835	0.0191088	0	0.068314	0.315845	0	none	none	none
ENSMUSG00000003053	Cyp2c29	1473	0	0	0	0	0	0	0	0	0	0	0	0	0	0	0	0	0	0	0	0	NA	NA	NA	0	0	0.0206271	0	0	0	none	none	none
ENSMUSG00000003062	Stard3nl	798	28.7094	34.8297	27.1222	37.5042	41.4601	35.1496	43.9704	32.3357	33.0975	41.8405	39.7462	37.238	68.7785	73.2479	72.1203	4.96442	5.28681	5.22758	5.3437	6.17756	11.7532	11.3978	11.4339	4.44758	3.77259	0.919255	1.36716	1.38191	1.46602	none	none	none
ENSMUSG00000003068	Stk11	1311	22.1247	17.759	16.7754	16.7648	12.7408	10.6977	17.032	17.5547	11.1448	12.562	13.1799	17.9324	11.1344	12.4917	12.117	4.31371	3.84811	4.02182	3.9596	3.6909	12.7119	12.8597	12.9992	5.08491	4.93891	3.52553	3.75247	2.58286	2.54559	none	none	none
ENSMUSG00000003070	Efna2	630	4.33714	4.01069	2.21644	2.96909	4.58879	3.51496	0	0.553493	1.78398	3.22285	7.13849	8.06038	0.463401	0.799833	0	2.17678	2.22988	0.831194	2.83604	0.506986	10.0115	9.93317	8.07926	2.03562	2.10657	1.62472	0.790904	0.220937	0	none	none	none
ENSMUSG00000003072	Atp5d	507	541.008	499.794	435.156	438.116	440.324	388.726	1149.27	679.519	412.32	424.946	427.176	557.92	173.899	179.394	174.124	8.9454	8.72584	9.54697	8.87963	7.46602	15.3594	15.3967	15.9988	7.67299	8.01744	8.14442	7.8176	7.10657	5.7566	none	none	none
ENSMUSG00000003099	Ppp5c	1500	115.041	110.094	94.0213	110.049	96.5786	93.0059	109.164	117.861	123.63	59.5583	59.9633	59.0557	68.3146	67.018	68.5763	6.74665	6.65647	6.88123	5.91948	6.10789	15.0543	14.9178	14.813	5.73552	5.77575	4.52922	4.06891	3.95041	3.29777	none	none	none
ENSMUSG00000003119	Cdk12	4455	10.1908	10.9788	10.7352	9.86696	10.5269	9.11286	7.16017	8.68817	9.58662	3.79797	3.61289	4.13724	9.50207	7.86098	6.66385	3.54039	3.4377	3.24463	2.2778	3.17136	NA	NA	NA	1.774	1.59136	0.276033	0.151577	0.305246	0.789981	none	none	none
ENSMUSG00000003123	Lipe	3219	1.43649	1.23348	1.30136	0.290544	0.598723	0.687924	1.32126	2.38317	0.523721	3.29394	3.23538	3.97301	11.246	8.60957	7.84727	1.21647	0.6095	1.26866	2.17017	3.35534	8.16811	8.5075	9.38953	2.02857	2.91711	0.916461	2.27253	2.72007	2.04441	none	none	none
ENSMUSG00000003131	Pafah1b2	690	292.735	371.948	338.465	416.802	359.854	351.955	396.035	441.688	401.511	147.457	140.646	128.927	143.856	126.339	132.095	8.38966	8.5592	8.69376	7.12939	7.07785	15.8343	15.8856	16.0088	5.853	5.1416	3.17922	2.71944	1.79947	1.9534	none	none	none
ENSMUSG00000003134	Tbc1d8	3405	6.35801	5.40649	4.51099	2.74673	1.88673	2.81816	3.74726	1.53613	0.825188	0.86132	1.18175	0.662821	7.28785	5.40151	5.65956	2.68373	1.80069	1.60226	0.927489	2.83113	11.2428	10.7651	10.1173	2.5656	1.72828	0.176569	0.146196	0.2943	0.421814	none	none	none
ENSMUSG00000003135	Cnot11	1518	41.4	41.8507	40.4741	32.346	34.4915	35.9832	28.018	29.1732	30.726	23.7786	23.545	24.036	23.0785	20.9126	16.8121	5.40059	5.14052	4.92152	4.63148	4.4106	11.6955	11.665	11.5419	3.41954	3.29082	1.74212	1.51877	1.77971	1.84274	none	none	none
ENSMUSG00000003153	Slc2a3	1482	140.974	134.813	127.67	98.4486	104.687	102.603	151.385	138.586	134.99	24.9651	25.3947	13.4521	10.0466	9.52028	9.13741	7.08199	6.68528	7.15637	4.47707	3.40164	13.8658	12.5272	13.4319	5.47703	4.36504	3.09832	1.80031	1.24621	0.81844	none	none	none
ENSMUSG00000003154	Foxj2	1698	22.6524	23.7028	17.8862	25.3369	18.7281	14.7802	19.4121	20.536	20.8498	9.30034	10.0366	10.9655	20.4601	18.9925	23.3117	4.48631	4.36563	4.41048	3.4726	4.45427	NA	NA	NA	3.36457	2.99639	0.771887	0.757935	0.935403	1.05834	none	none	none
ENSMUSG00000003161	Sri	597	94.3542	89.1825	73.6771	84.5966	83.3975	82.84	181.667	112.729	119.544	168.161	153.437	193.431	234.728	226.626	216.359	6.43859	6.40278	7.11873	7.43193	7.82594	12.2047	12.3622	11.637	4.7148	5.1334	1.86743	2.83845	2.52461	1.62217	none	none	none
ENSMUSG00000003166	Dgcr2	1650	0	0.546913	0.634707	0	0	0	0	0	0.340577	0.410181	0.143453	0.45594	0.176935	0.763477	0.157828	0.479099	0	0.155135	0.418487	0.450042	NA	NA	NA	5.41549	5.04381	1.95502	1.53274	1.21904	0.910305	none	none	none
ENSMUSG00000003184	Irf3	1260	7.00615	5.8728	6.0952	3.34022	6.88318	5.27244	13.502	9.68613	8.91989	13.9657	13.5256	21.3451	30.3528	24.3949	20.668	2.87277	2.62417	3.54877	4.11093	4.70811	9.35504	9.83708	10.2502	2.44361	3.6997	2.97807	3.41949	4.81432	4.49857	none	none	none
ENSMUSG00000003190	Bcl2l12	768	0	0	0	0	0.418249	0	0	0	0	3.23124	2.4656	2.4489	6.84241	4.26473	6.10351	0	0.188295	0	1.89346	2.75208	NA	NA	NA	0.782409	2.07039	0.518753	1.05794	1.78419	1.34912	none	none	none
ENSMUSG00000003198	Zfp959	1620	2.0759	1.44831	2.37036	2.02063	2.37937	2.73386	3.28174	1.72198	1.73442	1.53185	2.48386	0.928768	2.16254	2.95494	2.25051	1.56796	1.75615	1.69868	1.40499	1.7891	9.75923	9.68317	9.1951	1.29866	0.85333	0.786058	0.832169	1.08375	1.71996	none	none	none
ENSMUSG00000003199	Mpnd	1464	22.8274	20.0946	17.4068	22.9982	20.6245	13.6133	15.9783	12.3855	11.8993	14.6393	21.8266	19.6554	8.37541	11.1862	9.07188	4.39983	4.32759	3.8501	4.30064	3.39842	13.0874	13.5116	14.1861	4.94298	5.06609	4.30122	3.95555	2.75804	2.05822	none	none	none
ENSMUSG00000003200	Sh3gl1	1107	26.3917	25.5967	21.7589	31.6823	30.1774	29.339	49.9465	21.7347	28.9352	20.5832	19.4575	19.708	50.1076	40.5119	52.6949	4.67708	4.97267	5.11015	4.38655	5.60797	11.733	11.9731	11.0636	3.83794	3.78241	3.0525	3.87452	4.33009	4.0251	none	none	none
ENSMUSG00000003206	Ebi3	687	0.917837	1.05084	0.508135	0	0.467562	1.07444	0	0	0	0.328384	0.689075	0	58.2186	50.9762	50.7944	0.868373	0.598367	0	0.421321	5.76367	7.13337	6.16197	6.33821	0.731183	0.341037	1.56746	4.69583	5.80888	4.42573	Cx3cr1	none	none
ENSMUSG00000003208	Yju2	945	4.89319	7.44843	7.01872	7.91756	6.7982	10.9354	5.62584	4.42795	2.9733	9.54919	7.01326	7.3638	14.8288	11.7309	11.5741	2.89791	3.25556	2.41748	3.16598	3.77729	9.79993	10.1998	9.70426	NA	NA	NA	NA	NA	NA	none	none	none
ENSMUSG00000003226	Ranbp2	9162	40.5366	41.8995	43.7028	37.1573	43.4036	44.875	13.2301	14.5768	17.7872	11.179	8.73212	8.56008	19.2462	15.7845	15.3487	5.42782	5.41994	4.01775	3.391	4.15325	10.0709	9.75018	9.50817	3.77821	3.1088	0.299675	0.0677247	0.255323	0.976597	none	none	none
ENSMUSG00000003227	Edar	1347	0.312078	0	0	0	0	0.54799	0	0.258872	0	0.334966	0.351444	0.558502	0	0	0	0.142774	0.242039	0.11941	0.500772	0	NA	NA	NA	0.0565835	0.128733	0	0.003971	0	0	none	none	none
ENSMUSG00000003228	Grk5	1773	3.08223	2.95203	2.75648	3.42877	2.71755	2.91427	0	4.52347	6.97291	1.5269	1.33501	0.742543	0.823302	1.56313	1.61567	1.97462	2.00727	2.27266	1.13848	1.22282	10.294	10.0756	9.84688	2.31615	1.02385	0.0431071	0.024985	0	0	none	none	none
ENSMUSG00000003233	Dvl3	2157	21.7298	23.0099	19.259	11.707	9.23288	9.92402	36.971	35.0802	20.321	13.5966	18.3257	21.9727	8.3915	8.52673	6.51946	4.4811	3.49672	4.99053	4.24527	3.13956	12.8362	12.0775	13.6631	3.99639	3.72465	0.228798	0.0566938	0	0.112968	none	none	none
ENSMUSG00000003234	Abcf3	2130	34.2413	33.7237	31.1394	31.1754	31.8199	28.4167	31.9485	33.7241	29.2849	15.3577	15.6687	19.3373	21.93	16.4416	16.9943	5.08894	4.97594	5.02912	4.15283	4.28209	13.8128	13.9307	14.457	4.36877	4.64539	2.69149	2.32379	2.47356	2.01454	none	none	none
ENSMUSG00000003235	Eif2b5	2154	20.394	18.1822	15.7203	17.3679	14.6142	19.1903	16.7835	17.4836	11.74	14.1393	13.2964	14.7562	9.48746	8.07074	9.43012	4.25541	4.17453	4.02996	3.91303	3.32137	13.5414	13.5819	13.5306	4.5435	4.69191	2.65566	2.52659	2.04968	1.81087	none	none	none
ENSMUSG00000003269	Cyth2	1203	151.654	162.628	157.569	101.845	84.6427	72.4029	68.0573	56.8124	54.6538	38.6314	36.7934	31.1114	26.2093	20.9433	20.9978	7.30637	6.44786	5.92698	5.1903	4.56784	14.2529	13.8905	13.2108	4.83289	4.72719	3.97944	3.31311	2.75667	3.27275	none	none	none
ENSMUSG00000003271	Sult2b1	1119	12.2091	12.2579	14.9743	14.6265	14.0657	14.5122	1.90042	4.36265	2.00877	0.403217	1.48068	1.51267	0.260896	1.12577	0.698167	3.82244	3.945	1.90969	1.09234	0.761238	10.9546	11.1629	8.71638	2.90304	1.85333	0.408007	0.168633	0.0162515	0.0180571	none	none	none
ENSMUSG00000003273	Car11	987	91.9957	87.2234	80.6406	79.123	54.6749	56.8377	16.1593	29.3234	22.7742	20.1143	19.6648	17.3403	6.50734	10.9764	6.06846	6.45319	6.01224	4.56999	4.3248	3.1458	13.5405	13.4573	12.8974	5.8748	4.65764	5.65902	3.68776	1.62132	0.825955	none	none	none
ENSMUSG00000003279	Dlgap1	2979	195.721	172.06	165.228	214.743	199.91	174.191	72.0992	76.4356	64.1369	45.3623	54.0296	37.6909	8.23202	18.4372	14.4239	7.48115	7.62411	6.16773	5.54517	3.87752	15.0019	15.3676	14.8128	6.32517	5.62975	1.22155	0.437542	0.0832006	0.035446	none	none	none
ENSMUSG00000003282	Plag1	1500	0.700615	0.721925	0.232726	0.311754	0.64243	1.47628	0	0.232467	1.12391	0.451199	0.631193	0	0.583886	0.839825	0	0.633901	0.856114	0.538165	0.444452	0.560294	NA	NA	NA	0.659925	0.111031	0	0	0	0	none	none	none
ENSMUSG00000003283	Hck	1575	0	0.343774	0.221644	0	0	0	0	0	0	0	0.150284	0	113.626	94.3803	92.2618	0.249109	0	0	0.0705194	6.65949	NA	NA	NA	0.895303	0.793549	0.346054	2.4587	2.99546	2.79794	Cx3cr1	MG	none
ENSMUSG00000003299	Mrpl4	885	41.5619	38.9513	34.3172	35.4026	32.6659	33.3623	36.0435	35.0671	22.2241	26.0013	33.4318	32.9398	20.4525	20.7821	17.0668	5.29561	5.12144	5.00502	4.99055	4.35289	12.2738	12.6351	12.8574	4.43162	4.68893	4.32194	4.00058	4.16752	3.35681	none	none	none
ENSMUSG00000003308	Keap1	1875	24.6617	24.1604	19.9213	24.4415	20.7291	21.2585	22.6834	16.3657	12.288	9.98654	11.109	13.6417	17.4387	15.3184	16.6666	4.57981	4.53251	4.1789	3.65296	4.12719	12.6677	12.9318	12.4979	4.35473	4.17473	4.62524	4.2488	3.54471	3.2035	none	none	none
ENSMUSG00000003309	Ap1m2	1278	0.493391	0.564886	1.09261	0	0.502684	0.577576	0	0.272849	0	0	0	0	0.228437	0.394284	0	0.779859	0.443698	0.125584	0	0.272111	NA	NA	NA	0.422233	0.172061	0.165047	0.0682577	0	0	none	none	none
ENSMUSG00000003316	Glg1	3528	208.874	190.661	197.896	243.226	223.976	216.338	272.15	273.485	330.832	130.257	126.668	103.154	111.796	121.332	122.31	7.64489	7.83824	8.19552	6.91918	6.90061	14.2323	13.5468	14.2114	5.24336	4.48113	1.87061	1.08246	1.59144	1.14025	none	none	none
ENSMUSG00000003341	Atp8b3	4008	0	0	0	0	0	0	0	0.0870012	0	0.0562873	0	0.046925	0	0.0628611	0	0	0	0.0412435	0.0487999	0.0299175	NA	NA	NA	0.0565835	0	0.0808215	0.0467376	0	0	none	none	none
ENSMUSG00000003344	Btbd2	1572	29.95	32.1468	26.2039	34.2097	20.8422	15.4953	61.5515	30.8329	17.5163	15.2122	18.9719	22.971	11.5143	11.219	11.9275	4.92759	4.61564	5.23395	4.32565	3.65003	12.539	12.8114	12.8999	4.72901	4.2859	2.96001	1.87973	1.85469	1.17114	none	none	none
ENSMUSG00000003345	Csnk1g2	1329	22.4576	21.8642	17.8616	28.1493	18.1273	23.3273	20.0016	11.0199	9.30245	6.45055	7.83648	7.78341	14.0589	14.5974	12.1488	4.44147	4.59701	3.85213	3.06295	3.86807	13.3762	13.5071	12.989	5.74416	4.56316	7.59068	6.73286	5.33345	5.02515	none	none	none
ENSMUSG00000003346	Abhd17a	933	35.3687	40.2359	36.2933	22.0533	23.4112	15.0318	27.3514	26.9094	10.8415	11.3646	12.1774	9.67591	8.1356	11.0716	7.53616	5.25925	4.40364	4.50467	3.59367	3.30954	13.2501	13.2075	13.0186	6.2791	5.35567	6.74807	5.98096	4.28738	3.70135	none	none	none
ENSMUSG00000003348	Mob3a	654	5.7849	8.27895	6.4053	5.00523	2.45577	3.38597	13.0065	10.6636	10.3111	10.3486	12.3054	13.8037	66.513	67.8023	77.647	2.96773	2.20654	3.62376	3.71727	6.16298	8.72856	8.23693	8.41851	2.76553	2.84264	0.947481	2.69838	2.68021	2.24134	Cx3cr1	none	none
ENSMUSG00000003352	Cacnb3	1455	84.3628	77.8984	81.0942	57.5299	58.0615	41.5998	10.2309	6.95005	10.428	9.76823	9.27268	5.42898	2.40778	4.67531	3.93757	6.35963	5.73869	3.35092	3.19482	2.22452	14.9481	14.3284	12.5128	6.31034	5.03122	4.99256	3.30019	1.21231	0.568597	none	none	none
ENSMUSG00000003354	Ccdc65	1482	10.495	12.4218	12.4843	6.94189	9.53675	6.47493	5.02226	4.70581	3.03348	3.19676	2.87487	2.15741	0.590977	0.68002	0	3.67811	3.1129	2.39338	1.9042	0.50961	10.4978	10.3878	10.8284	2.17632	1.61667	0.435214	0.0874742	0	0	none	none	none
ENSMUSG00000003355	Fkbp11	606	2.77471	1.48912	1.15211	0	0	0	5.26379	6.90496	6.4912	10.0515	12.4989	9.62102	0.963508	0.415755	0	1.48816	0	2.852	3.55137	0.545725	5.53458	5.37701	8.87237	1.01436	0.975752	1.65769	0.92679	0	0.59646	none	none	none
ENSMUSG00000003360	Ddx23	2460	36.9959	32.7948	39.1661	37.8287	23.5035	31.206	35.4428	30.0506	27.1839	26.4117	25.2092	27.982	48.4198	35.1292	41.8148	5.22184	4.99304	4.99514	4.78316	5.41913	12.8559	13.1236	13.1982	4.26604	4.32769	0.37398	0.0845903	0.317807	0.39754	none	none	none
ENSMUSG00000003363	Pld3	1467	1442.06	1307.78	1218.84	1003.16	790.666	736.129	304.417	239.836	209.918	205.3	203.137	171.024	314.829	339.193	317.399	10.3706	9.72164	7.97951	7.60106	8.34344	16.7222	15.7492	14.9115	7.88972	7.04992	4.3319	4.33393	4.57327	3.20256	none	none	none
ENSMUSG00000003378	Grik5	2940	22.5913	20.9334	19.3543	21.95	22.7254	12.5534	5.42492	4.2698	5.16079	6.90611	7.64838	7.86846	1.88671	3.08507	3.27735	4.45678	4.32742	2.57334	3.0831	1.90678	14.6509	14.2732	13.2716	5.27128	4.70487	2.81614	1.1592	0.376266	0.168544	none	none	none
ENSMUSG00000003379	Cd79a	663	0.317021	0	0	0	0	0	0	0.525944	0	0	0	0	0	0	0	0.144925	0	0.233047	0	0	NA	NA	NA	0.0285692	0.0191088	0	0	0	0	none	none	none
ENSMUSG00000003380	Rabac1	681	202.469	178.891	146.607	146.95	133.957	91.0483	296.658	317.466	223.626	199.76	249.558	262.367	191.628	210.141	206.497	7.46752	6.96561	8.13057	7.8962	7.67069	NA	NA	NA	7.02215	7.33991	7.17556	8.00383	7.72949	6.9265	none	none	none
ENSMUSG00000003382	Etv3	1542	6.81532	6.08627	7.47078	6.06525	8.74905	4.78691	3.44775	8.36701	5.8309	2.04825	3.37701	3.17118	15.1462	10.7837	14.0172	2.96177	2.91337	2.7828	1.95065	3.83953	12.7028	12.5738	12.7075	3.04963	2.28096	1.31202	2.03158	2.06595	2.57076	none	none	none
ENSMUSG00000003402	Prkcsh	1587	76.0214	66.3015	65.3305	99.8909	71.8534	84.6514	136.009	126.341	119.331	113.866	133.935	142.094	136.681	157.487	134.064	6.13376	6.43405	7.00256	7.03303	7.16736	13.1049	12.5484	13.0984	4.98368	5.93515	3.30116	4.18538	4.87684	3.78944	none	none	none
ENSMUSG00000003410	Elavl3	1104	83.1981	81.9032	71.4621	84.7158	83.5043	69.5351	148.32	146.24	128.272	19.8217	17.5808	13.1176	10.0488	10.726	8.9636	6.3193	6.32646	7.14918	4.15705	3.44795	13.2954	13.4158	13.6347	5.71589	4.72792	5.69432	3.44869	1.64456	0.484411	none	none	none
ENSMUSG00000003411	Rab3b	687	80.7696	77.2365	72.1552	34.715	60.3155	26.8611	171.797	139.074	104.702	22.0017	17.916	10.6768	5.52439	11.3688	9.85564	6.28022	5.37957	7.12437	4.15905	3.3098	13.0767	12.9208	15.5165	3.84197	1.72828	1.64208	0.706262	0.123932	0.102148	none	none	Int_Sst
ENSMUSG00000003418	St8sia6	1197	0	0.75389	0	5.0787	3.48855	3.69996	0	1.74787	3.75574	0.565413	0.395484	0	8.04855	14.7338	8.48474	0.323424	2.3474	1.50311	0.400865	3.51379	3.31501	5.98402	3.31554	0.422233	0.0473057	0.0155914	0.0288463	0.0867193	0.102048	none	none	none
ENSMUSG00000003420	Fcgrt	1110	1.32549	0.487787	0	0.421289	0.868149	1.32999	0	2.19901	4.05011	60.1599	66.3179	92.0045	139.396	125.747	125.985	0.682057	0.90546	1.62435	6.20609	7.03756	5.22587	5.71848	7.72544	2.94486	4.85931	2.19253	4.37342	4.15449	3.17445	none	none	none
ENSMUSG00000003421	Nosip	906	49.6463	43.2278	48.5488	46.4534	37.2269	35.0332	62.201	44.646	32.8736	26.1457	33.1794	35.9129	39.9569	35.039	42.253	5.58919	5.34238	5.57209	5.03325	5.32492	12.4478	12.586	12.5985	4.34767	4.71918	2.76313	3.18093	3.35842	2.44753	none	none	none
ENSMUSG00000003423	Pih1d1	873	45.0224	40.1069	40.3872	32.1396	26.124	20.2926	31.6671	25.9628	18.6674	24.8082	23.3173	26.0677	40.1296	43.8671	45.9383	5.42085	4.76476	4.72424	4.68544	5.46961	12.2153	12.1443	11.6794	4.1127	4.39232	2.72723	3.39677	2.97532	2.587	none	none	none
ENSMUSG00000003429	Rps11	477	79.315	103.673	104.654	109.8	121.887	119.155	220.682	209.074	202.633	114.928	113.635	131.692	270.521	210.22	207.459	6.59813	6.882	7.72653	6.91988	7.848	13.9955	14.3078	14.4722	6.52136	6.06494	4.05119	6.68471	4.65206	5.69899	none	none	none
ENSMUSG00000003435	Supt5	3249	70.8378	66.3264	61.566	53.974	56.6501	59.9783	43.199	31.4464	29.0576	14.3734	12.6763	16.1505	45.1078	34.0427	33.5038	6.07132	5.85468	5.15249	3.94487	5.26871	15.143	15.0386	14.8746	5.20789	5.15137	2.77461	2.76801	2.30118	2.30303	none	none	none
ENSMUSG00000003436	Dll3	1758	0.239118	0.102663	0	0	0.182716	0	0	0.396702	0.319655	0.384982	0.13464	0.106983	0.166065	0	0	0.155655	0.085296	0.308926	0.273657	0.0777285	NA	NA	NA	0.62293	0.759866	0.8932	0.108622	0	0.0675941	none	none	none
ENSMUSG00000003437	Paf1	1608	55.814	55.8953	48.6293	47.9845	60.1279	70.6927	25.7886	29.0584	26.2105	27.7791	26.3488	27.954	31.9539	25.3828	32.8759	5.76676	5.92129	4.80834	4.82582	4.95749	12.8985	13.0547	12.2998	4.37851	5.02414	4.26776	3.52713	3.09255	3.41345	none	none	none
ENSMUSG00000003438	Timm50	1062	19.7914	21.2431	21.0374	23.3375	23.5921	21.5465	38.046	42.3563	35.4528	21.8802	23.6252	21.9598	21.717	15.895	17.1649	4.439	4.57443	5.3081	4.55388	4.26746	11.3486	11.5211	11.8984	4.33056	4.85798	3.1129	3.4247	2.98249	2.70938	none	none	none
ENSMUSG00000003444	Med29	600	4.554	6.91845	5.23633	7.01447	3.21215	4.92095	24.81	8.71752	6.55612	6.76799	8.28441	7.52302	3.406	5.87877	2.17014	2.7158	2.59674	3.8441	3.09172	2.26852	11.716	11.9964	11.8681	2.03562	2.16135	1.96895	1.67206	2.48783	1.64457	none	none	none
ENSMUSG00000003452	Bicd1	2928	22.0378	24.2861	22.7719	20.922	20.9536	22.1846	20.6992	20.4838	24.5662	14.7934	12.6918	13.3606	2.59239	3.78609	2.75714	4.58688	4.48242	4.51831	3.8694	2.01621	11.7397	11.5172	11.7373	2.33914	1.66297	1.06594	0.265416	0.212822	0.0371132	none	none	none
ENSMUSG00000003458	Ncstn	2127	66.2077	62.2817	62.5308	47.7085	54.5174	52.7492	64.9868	64.9203	76.8821	48.3655	48.2965	46.9525	162.922	190.826	172.509	6.0151	5.71859	6.12783	5.61092	7.46286	13.1847	12.3637	12.9672	4.42626	4.47983	0.935696	2.14421	2.52124	1.86428	none	none	none
ENSMUSG00000003464	Pex19	900	77.0677	87.0321	78.3511	67.5467	58.8894	41.0079	100.421	94.9241	104.898	93.9999	97.5719	113.472	42.8183	30.2337	40.5092	6.35433	5.82819	6.65937	6.68203	5.27998	12.9972	13.178	13.3622	4.90497	5.27426	2.0394	1.78005	2.24719	1.91418	none	none	none
ENSMUSG00000003469	Phyhip	993	661.245	707.385	657.398	661.182	741.738	644.48	396.189	309.722	298.803	70.6561	59.5915	48.8655	27.6361	28.417	23.0782	9.40161	9.41673	8.39191	5.92373	4.7749	17.4714	17.5253	15.2861	7.91049	7.40645	5.96539	3.51093	1.52126	0.535169	none	none	none
ENSMUSG00000003476	Crhr2	1296	0	0	1.07744	0	1.23926	2.27822	0	0	0	0.348148	0	0.43536	0	0.194404	0.401877	0.442699	1.11935	0	0.334762	0.261543	5.1762	6.61833	3.39841	0.443607	0.111031	0.0770782	0.0292184	0	0	none	none	none
ENSMUSG00000003477	Inmt	795	0.264383	0	0	0	0	0	0	0	0	0	0	0	0.367224	0	0	0.121848	0	0	0	0.166597	NA	NA	NA	0.443607	0.0285692	0.806182	0.386791	0	0	none	none	none
ENSMUSG00000003484	Cyp4f18	1575	0	0	0	0	0	0	0	0	0	0	0	0	3.52185	2.23953	0.992062	0	0	0	0	1.70095	NA	NA	NA	0.0840643	0.0191088	0.0444762	0.891606	0.309655	0.169316	Cx3cr1	none	none
ENSMUSG00000003500	Impdh1	1617	47.4443	49.557	43.6091	25.7385	26.023	22.3679	36.8237	34.7191	26.7597	3.34842	4.39142	3.25672	3.97201	6.6999	5.47567	5.58105	4.68425	5.07756	2.22204	2.67413	13.7854	13.1181	13.6082	4.54967	3.38773	3.36379	1.76634	1.01243	0.410475	none	none	none
ENSMUSG00000003505	Psg18	1431	0	0	0	0	0	0	0	0	0	0	0	0	0	0	0	0	0	0	0	0	NA	NA	NA	0	0	0	0	0	0	none	none	none
ENSMUSG00000003518	Dusp3	633	222.47	208.708	194.122	121.156	130.922	124.773	112.544	110.174	61.2555	60.944	78.8991	73.9823	82.5557	70.8478	81.0458	7.71035	6.98432	6.57981	6.17543	6.30651	15.8005	15.4464	15.3822	5.6893	4.71003	4.81335	4.64945	2.99246	3.05117	none	none	none
ENSMUSG00000003526	Prodh	1800	2.21862	1.40374	1.55151	0	0.535358	0	1.77214	0	2.18537	52.6399	47.208	88.3955	2.59505	2.3795	1.44676	1.44606	0.236894	1.21361	5.9943	1.65096	6.69089	6.76188	7.47965	3.27501	6.08108	3.71849	2.87169	1.6737	1.68216	GFAP	none	none
ENSMUSG00000003527	Ess2	1443	14.4202	13.5079	12.8217	11.6665	10.2397	8.69606	13.2634	12.3241	10.9041	6.09729	4.75691	5.47413	8.29498	11.8728	8.6625	3.86624	3.48552	3.71852	2.68768	3.40736	11.8094	11.6072	11.8197	NA	NA	NA	NA	NA	NA	none	none	none
ENSMUSG00000003528	Slc25a1	936	17.0663	15.6186	14.9183	14.4886	14.0703	18.9267	21.5838	14.1567	7.20452	53.0256	49.0591	57.2666	48.3452	37.6844	40.3423	4.07619	4.07284	3.93687	5.75801	5.43042	10.882	11.1665	10.602	4.18745	5.73046	5.63203	5.74037	4.50221	3.86514	none	none	none
ENSMUSG00000003531	Dgcr6	702	23.3538	20.8248	21.8802	23.9811	19.6756	8.41187	25.7491	17.8821	18.4116	30.8512	38.1009	36.1684	8.31746	9.69028	8.16119	4.52479	4.19819	4.43835	5.17153	3.2814	13.0052	13.0187	12.8436	4.96162	5.2765	4.80797	3.60063	2.73327	1.59568	none	none	none
ENSMUSG00000003534	Ddr1	2736	9.75638	10.0267	9.69692	5.8112	6.22237	6.20514	10.4929	10.3234	10.2696	47.6596	55.1083	57.605	2.88101	2.85467	1.99881	3.43652	2.82366	3.50614	5.76706	1.83922	11.85	10.9627	10.9841	4.50843	5.74434	2.13241	0.831	0.0637396	0.0589658	GFAP	none	Olig
ENSMUSG00000003541	Ier3	483	16.5363	14.573	17.346	0.96818	3.32521	1.52824	41.8269	22.3804	16.2885	9.80868	9.31108	8.95597	3.62662	3.65141	4.31331	4.10029	1.55608	4.79867	3.37275	2.28208	10.7597	8.58746	9.57745	3.51096	2.56884	4.87794	3.94552	4.88947	4.57234	none	none	none
ENSMUSG00000003545	Fosb	1017	10.5402	8.69575	8.58134	4.13833	3.15846	1.45161	0	0.342872	0	1.10914	0.465482	0.369863	0.287063	0.743208	0.256063	3.36071	1.96943	0.156126	0.720859	0.514782	13.2587	11.5098	9.60504	3.20789	2.16993	2.04188	1.32226	0.780288	1.95909	none	none	none
ENSMUSG00000003546	Klc4	1860	8.9272	8.92703	6.56888	3.01697	3.97201	5.95276	7.43156	9.93609	3.92763	6.67096	8.78071	8.89819	15.225	11.5137	17.3611	3.19236	2.40978	3.01764	3.1885	3.97269	9.69962	9.6592	11.0966	3.13422	3.67732	2.02935	3.1769	2.46324	2.07101	none	none	none
ENSMUSG00000003549	Ercc1	897	21.5574	19.5169	18.6803	20.3318	21.1279	18.9267	30.8198	21.3808	20.0474	19.3659	21.6379	17.8221	18.5516	15.7292	18.2901	4.38669	4.40114	4.64862	4.36518	4.21129	10.8862	11.2885	11.2909	3.56803	4.17632	1.07931	1.06573	1.64363	0.789681	none	none	none
ENSMUSG00000003555	Cyp17a1	1524	0	0	0	0	0	0	0	0	0	0	0	0	0	0	0	0	0	0	0	0	NA	NA	NA	0	0.0191088	0	0	0	0	none	none	none
ENSMUSG00000003559	As3mt	1131	2.23008	2.39365	1.23462	4.13467	1.13604	3.26323	6.58089	4.31637	3.47805	37.3007	38.7171	44.3998	59.8857	55.914	61.0171	1.56207	1.94285	2.534	5.36244	5.90542	7.71369	8.37323	9.56778	3.04963	4.76765	0.390545	0.968961	0.839437	0.921967	none	none	none
ENSMUSG00000003573	Homer3	1080	0.194615	0.501337	0	22.5156	14.8711	18.4535	383.964	375.822	281.497	12.1155	12.9307	12.3642	14.0565	12.5974	7.95716	0.300984	4.29377	8.44333	3.75169	3.64812	5.98154	12.153	7.71651	5.24031	4.40008	3.61888	3.49779	2.03745	2.01248	PV	none	none
ENSMUSG00000003575	Crtc1	1893	74.7249	63.402	55.8764	82.5086	64.4806	46.4019	38.1951	32.6043	30.5764	9.77241	10.8783	8.54437	8.79067	7.45328	8.80435	6.03711	6.03262	5.12068	3.42381	3.22488	13.3378	13.6327	11.3463	5.06264	4.34955	2.67856	1.43856	0.71438	0.381669	none	none	none
ENSMUSG00000003581	Rnf215	1140	7.55927	10.1323	8.57412	9.43466	3.94475	6.47493	12.1252	9.17633	6.90117	41.162	44.0174	61.8669	16.3898	14.8074	17.818	3.28617	2.92943	3.37864	5.6443	4.1159	9.93135	9.48313	10.0079	3.11103	4.71736	2.70724	2.95663	4.33315	4.06918	none	none	none
ENSMUSG00000003585	Sec14l2	1212	42.141	36.6323	35.1393	46.3001	51.6806	46.8952	29.8281	18.9887	16.228	129.366	122.059	165.575	13.9709	11.2254	12.0324	5.28432	5.62328	4.50345	7.12928	3.74519	12.116	12.855	11.9431	3.85	5.81421	2.22361	1.88382	1.03463	0.785196	GFAP	none	none
ENSMUSG00000003604	Aven	1029	4.90227	3.85868	4.41026	2.72671	5.30676	0	6.19991	5.0831	4.36892	3.72711	2.30027	5.30047	7.09288	7.8351	5.56769	2.43039	1.87885	2.63629	2.25579	2.96936	9.76725	9.39054	9.76813	2.9222	3.10545	0.164572	0.221148	0.151985	0.104482	none	none	none
ENSMUSG00000003617	Cp	3261	1.16017	0.83018	0.642298	0	0.394008	0.226354	0	1.06931	1.72325	11.5532	14.5894	10.5544	32.9454	33.8402	25.7142	0.908852	0.271172	0.949238	3.726	4.99246	4.31673	3.96625	6.42178	1.25096	1.21412	0.106465	0.22123	0.219918	0.0956749	none	none	none
ENSMUSG00000003623	Crot	1839	9.94348	9.02897	10.8201	5.59428	6.28806	8.42903	19.6583	27.3045	18.9457	96.9134	82.2456	115.054	49.054	38.9087	45.0312	3.45033	2.958	4.52165	6.63039	5.50244	9.77246	9.70413	11.8492	3.35896	5.54844	0.441001	0.412657	1.13252	1.27697	none	none	none
ENSMUSG00000003644	Rps6ka1	2226	2.26614	3.16207	3.45012	1.68061	1.87592	3.316	46.8113	24.9072	29.0317	3.14177	4.46599	3.88655	256.401	234.291	257.258	1.9853	1.71846	5.11201	2.27245	7.96761	8.35686	7.9463	10.3844	3.88557	3.69822	1.25296	4.40758	4.52257	3.79279	Cx3cr1	none	none
ENSMUSG00000003657	Calb2	816	5.92432	12.386	3.85025	5.73077	18.1077	10.855	664.553	447.841	703.818	72.4352	70.7772	26.2752	18.2464	13.8942	12.7655	3.06813	3.65128	9.24414	5.84539	3.99717	9.19461	10.2055	7.32159	6.57894	6.23368	4.00684	2.30959	0.556508	0.105337	PV	N	Int_Sst
ENSMUSG00000003660	Snrnp200	6411	58.5212	53.8826	52.1102	50.1111	58.7717	52.3872	28.6926	23.5513	17.1803	18.2281	17.0204	22.9997	32.4229	24.7585	29.9371	5.80317	5.77496	4.59344	4.35163	4.90879	12.5381	12.568	12.3317	4.36317	4.36317	2.3522	2.42612	1.40585	1.44893	none	none	none
ENSMUSG00000003662	Ciao1	1020	39.7702	41.0506	33.1977	38.0523	34.9557	32.5651	35.4428	24.6142	9.91681	11.0588	12.531	16.7793	26.6183	25.1947	17.6164	5.28563	5.17756	4.60434	3.85363	4.59354	12.4684	12.6244	12.8622	4.32769	4.41052	3.65126	3.11159	3.72052	3.33051	none	none	none
ENSMUSG00000003665	Has1	1752	0.839779	0.412058	0.597755	0.266913	0.366684	0.842628	0.606898	1.59224	0.320749	0	0	0.322047	0.166634	0	0	0.692901	0.57732	0.879676	0.14711	0.0779876	NA	NA	NA	0.659925	0.180572	0.299653	0.117145	0	0	none	none	none
ENSMUSG00000003680	Taf6l	1872	7.41036	7.52005	7.83212	7.74389	7.03516	5.52029	8.51991	6.51951	3.60226	11.5692	8.9773	8.74069	19.806	15.2084	16.276	3.10224	2.95725	2.85078	3.42793	4.17766	9.99978	10.0547	9.99444	2.30451	2.73841	4.02033	3.81927	3.98972	3.89835	none	none	none
ENSMUSG00000003721	Insig2	678	36.2708	42.8576	53.5476	40.6936	44.0605	48.9917	78.4133	75.0889	107.749	43.2566	46.7809	33.0103	19.8073	27.8703	19.9729	5.49906	5.51039	6.4608	5.39286	4.55767	11.3188	11.3984	12.3372	4.43962	3.81831	1.7272	0.937464	1.10007	1.49023	none	none	none
ENSMUSG00000003731	Kpna6	1611	71.6272	78.9815	69.5578	78.9545	81.5499	89.3468	60.0614	59.3073	48.4863	33.3288	25.712	30.4703	35.7	35.8137	30.8749	6.21701	6.39718	5.83167	4.94659	5.13461	13.0686	13.1033	13.102	4.57894	4.38405	1.67876	1.16423	1.03521	1.14244	none	none	none
ENSMUSG00000003746	Man1a	2234	21.5453	25.9331	25.4707	175.623	159.026	208.16	27.6054	34.0272	44.5236	18.7831	19.2833	9.84997	136.432	140.071	131.374	4.662	7.50729	5.18529	4.0851	7.0976	9.99199	11.701	7.26984	2.26303	1.59455	0.0339453	0.164547	0.421944	0.530631	none	none	Olig
ENSMUSG00000003752	Itpkc	2037	4.64325	3.36686	3.08473	3.6731	2.36535	4.34841	3.13191	3.25249	3.58635	1.21826	2.09158	1.20029	5.7328	5.56585	5.49725	2.23213	2.15778	2.11223	1.32387	2.72217	8.8301	8.9177	8.70061	2.31034	2.03092	0.521048	0.839243	1.0638	1.15159	none	none	none
ENSMUSG00000003762	Coq8b	1602	6.42887	5.18236	4.57607	3.79476	2.80712	2.30381	0.663723	2.39432	1.75391	2.9573	3.39828	2.46541	5.83157	3.77449	3.4137	2.67712	1.98862	1.38072	1.97832	2.41682	10.9629	11.0178	10.2122	NA	NA	NA	NA	NA	NA	none	none	none
ENSMUSG00000003778	Brd8	2865	33.0133	35.5923	32.5329	24.3201	26.5717	27.0523	30.0614	39.3125	44.1324	21.8119	18.3409	17.3962	25.0673	21.5452	20.6333	5.1174	4.75389	5.2793	4.33507	4.54938	10.6235	10.6399	10.6428	3.33056	3.24995	0.819905	0.696744	0.766723	1.73207	none	none	none
ENSMUSG00000003779	Kif20a	2664	0.236694	0.338741	0.131039	0	0.241152	0.554161	0	0.261787	0	0.0846846	0.266551	0.211797	3.39723	0.567449	0.782031	0.305085	0.339256	0.1207	0.248143	1.36862	NA	NA	NA	1.66903	2.22651	0.107678	0.0344333	0	0.068699	Cx3cr1	none	none
ENSMUSG00000003808	Farsa	1527	17.3433	14.7742	12.345	22.6619	16.1975	9.66787	18.8007	13.7014	9.9363	7.53476	6.04532	6.77416	17.2068	16.1695	15.8603	3.98375	4.1023	3.92088	2.96065	4.12203	NA	NA	NA	3.6017	3.89207	2.33734	2.81199	2.6432	2.74311	none	none	none
ENSMUSG00000003809	Gcdh	1344	12.0418	11.0115	8.0519	8.00261	9.08197	6.59055	17.405	7.00515	5.85367	20.4785	21.3098	26.4481	10.6437	9.37304	8.52553	3.50696	3.15246	3.47092	4.56958	3.39425	10.9274	11.1996	11.6579	3.38405	4.86493	1.95105	1.26545	1.52883	1.88669	none	none	none
ENSMUSG00000003810	Mast2	5403	9.76427	9.38649	8.8516	7.52987	8.20427	8.88011	7.28142	6.84106	5.40839	4.09194	4.42466	3.51575	3.02587	3.21754	2.36172	3.36934	3.20238	2.90887	2.32504	1.95173	12.5997	12.5563	12.9721	4.29866	3.65076	0.911783	0.514256	0.302333	0.253849	none	none	none
ENSMUSG00000003812	Dnase2a	1062	0.98957	0.339889	0.328709	0	0.604925	0	10.0121	1.31337	3.17487	19.1186	22.065	29.2208	96.4896	124.076	127.511	0.6348	0.265007	2.54435	4.61283	6.87068	NA	NA	NA	1.65992	3.32481	1.48999	4.75437	5.57683	5.1408	Cx3cr1	none	none
ENSMUSG00000003813	Rad23a	1092	66.597	66.2756	66.8128	61.6656	47.3586	52.0485	105.16	88.1331	87.9981	48.1362	58.7408	59.9361	66.5694	56.2959	62.0039	6.07814	5.77323	6.56626	5.82284	5.96862	12.9008	13.0616	13.2653	5.0197	5	4.36202	4.7005	4.11934	3.84999	none	none	none
ENSMUSG00000003814	Calr	1251	654.916	676.336	653.251	746.49	718.433	762.334	1073.48	1076.48	1282.02	744.244	740.176	708.403	1739.52	1756.38	1746.1	9.37178	9.53803	10.1611	9.51558	10.7718	16.1761	15.6459	16.1754	7.67962	8.21801	5.5644	7.67057	7.7831	6.73962	none	none	none
ENSMUSG00000003824	Syce2	534	1.18081	1.01394	1.30745	5.25428	1.20305	0	0	3.91799	6.31408	4.64718	3.54603	1.4088	18.0414	14.6262	16.0931	1.11597	1.65647	2.141	2.07062	4.10882	6.43483	8.25885	7.36631	1.54597	1.71955	0.242128	0.416895	0.283742	0.300752	Cx3cr1	none	none
ENSMUSG00000003847	Nfat5	4659	27.9254	31.0293	27.8732	30.0111	32.2663	38.6578	15.2908	22.6779	23.1584	19.0784	17.9847	14.8151	8.58471	8.11163	7.60176	4.90413	5.11458	4.4179	4.1932	3.18577	11.7829	11.8751	11.7871	3.1375	2.37109	0.334304	0.10298	0.299969	1.20971	none	none	none
ENSMUSG00000003848	Nob1	1212	26.5332	25.9107	29.6668	30.0951	24.3827	38.9778	35.0919	18.7009	19.01	11.1683	11.913	7.29335	16.3796	12.6805	8.16487	4.82631	5.00683	4.65922	3.47572	3.74506	10.9224	11.1883	10.9852	3.75702	3.88688	1.98164	2.11917	1.79882	2.17067	none	none	none
ENSMUSG00000003849	Nqo1	825	4.07631	2.62518	2.53883	4.5346	1.94676	1.78943	11.5995	3.38134	2.04346	33.3614	24.9608	40.3507	0.70774	0.610781	1.57828	2.02861	1.90956	2.73872	5.08283	0.97497	6.33114	7.02224	6.80206	2.09085	3.98671	0.125018	0.0220473	0	0	GFAP	none	none
ENSMUSG00000003863	Ppfia3	3585	55.6388	48.8835	48.9796	49.1763	41.8431	32.12	18.9819	12.6447	9.56182	3.96451	3.49929	2.99032	2.44304	4.14641	2.76034	5.70507	5.39391	3.88063	2.16501	2.04145	14.9112	14.7246	13.6686	5.0781	3.78729	3.39183	1.67132	0.335283	0.176626	none	none	none
ENSMUSG00000003865	Gys1	2217	4.17146	3.90758	4.09396	2.95302	3.33241	3.32946	7.67368	6.2914	1.26737	15.1621	16.7621	28.1647	3.81883	3.06837	3.75883	2.33847	2.07209	2.60347	4.39435	2.18545	9.07543	9.4854	10.9514	2.69599	4.15381	0.923357	0.759186	0.907128	0.458405	GFAP	none	none
ENSMUSG00000003868	Ruvbl2	1392	18.7233	21.9119	21.5673	21.5003	22.1528	13.7871	32.8457	22.5453	14.5333	22.0413	23.8058	19.8614	37.122	35.4753	28.9975	4.44189	4.33247	4.60336	4.51745	5.12371	12.112	12.5744	12.5831	3.75489	4.56071	0.902285	0.64005	1.21095	0.576187	none	none	none
ENSMUSG00000003872	Lin7b	624	132.039	123.213	138.74	131.896	112.734	88.719	34.0796	35.7642	23.4147	12.6538	9.86239	9.64489	3.275	4.84514	5.008	7.04801	6.80885	5.00388	3.55095	2.42655	13.3656	13.5508	12.8518	5.13586	3.93168	5.25943	3.56801	2.37129	0.865111	none	none	none
ENSMUSG00000003873	Bax	579	16.3356	18.7027	10.8525	16.1531	12.2051	16.5731	11.0185	11.4427	19.4111	14.4166	16.3521	19.1649	26.2194	23.9328	15.7419	4.02653	3.99793	3.90279	4.14115	4.52135	12.2863	12.635	12.3524	4.66334	4.9187	4.33219	5.13657	4.89659	4.22391	none	none	none
ENSMUSG00000003882	Il7r	1380	0	0	0	0	0	0	0	0.252682	0	0	0	0	26.6557	29.2113	27.3626	0	0	0.116667	0	4.84515	NA	NA	NA	0.137504	0.0749621	0.0773229	0.0792781	1.25234	1.85441	Cx3cr1	none	none
ENSMUSG00000003923	Tfam	732	57.4275	65.0916	65.8119	81.7715	90.3966	104.873	85.7019	81.9351	118.993	66.5704	47.5335	47.7897	57.8302	47.1541	38.4221	5.99496	6.54453	6.5931	5.78043	5.60887	12.9225	13.2807	13.5355	3.33628	3.35708	1.94878	2.02728	2.41324	2.23349	none	none	none
ENSMUSG00000003929	Zfp81	1596	9.8771	9.38593	12.6862	13.7711	20.1263	19.8873	4.66353	10.0503	13.0277	7.91578	7.86025	5.0672	6.21933	4.26227	4.0792	3.54223	4.24247	3.35715	2.99054	2.54932	10.8622	11.0055	9.8267	2.20163	1.42582	0.036716	0	0.0251881	0.314129	none	none	none
ENSMUSG00000003934	Efnb3	1023	15.6149	15.8781	10.5785	44.7975	34.5392	30.3049	4.15752	4.77205	2.74659	14.5548	15.2708	9.3762	3.70993	4.67937	7.38228	3.90918	5.23063	2.29044	3.81427	2.64552	12.8893	14.1102	11.7375	5.09001	5.11714	4.58594	3.17165	1.16787	1.01509	none	none	none
ENSMUSG00000003948	Mmd	717	19.0544	20.8925	34.5681	48.2632	52.8638	39.1205	4.44889	5.34966	6.27004	9.75396	6.93256	9.18081	4.4789	4.56808	4.35843	4.69144	5.5774	2.66816	3.2664	2.45114	15.1386	15.9598	12.8263	6.01614	4.44449	1.44366	0.288693	0.442088	0.569634	none	none	none
ENSMUSG00000003949	Hlf	888	248.056	234.138	231.94	138.499	141.074	166.248	259.834	194.77	182.255	220.519	222.037	231.706	31.2326	29.7911	26.9801	7.90113	7.22503	7.73665	7.81861	4.92289	12.6502	12.7267	12.1687	5.51728	5.41097	1.40727	0.595126	0.200026	0.135975	none	none	none
ENSMUSG00000003955	Fam162a	468	90.2716	91.0119	73.0998	143.886	119.426	134.064	220.382	205.644	223.34	225.118	256.928	234.291	79.8476	60.2951	57.8703	6.42281	7.06025	7.76457	7.90556	6.06618	11.9173	12.688	13.089	5.16752	5.88444	1.82961	1.1513	1.01543	0.963135	none	none	none
ENSMUSG00000003970	Rpl8	774	197.421	222.22	188.977	198.773	170.153	143.051	200.568	225.259	162.632	176.049	193.272	218.206	374.547	308.587	291.707	7.67153	7.4234	7.62317	7.6209	8.34849	14.4015	14.6922	14.6226	8.02048	8.2102	8.88549	9.93647	9.16384	7.83868	none	none	none
ENSMUSG00000003974	Grm3	2640	96.7327	93.317	97.8507	21.256	22.8744	27.1211	26.5821	35.1342	35.7606	417.103	383.557	391.895	7.40916	11.3567	8.28597	6.59942	4.62939	5.06576	8.6385	3.32442	11.2931	9.23325	10.059	4.20633	5.9905	0.130574	0.0110608	0.00995928	0.00414084	GFAP	AS	none
ENSMUSG00000003992	Ssbp2	1086	98.1249	95.7248	99.9693	59.4227	70.3952	72.7267	75.3894	88.9412	69.3386	65.0209	61.8988	59.9209	19.893	19.0236	29.4947	6.62848	6.09835	6.30177	5.98368	4.57312	13.0308	13.0464	13.3787	3.6893	3.08066	0.254519	0.0857797	0.166575	0.142314	none	none	none
ENSMUSG00000004018	Fancl	1128	4.84468	6.40004	6.18952	12.0224	9.96678	9.81572	0.942628	4.32785	1.99274	3.99999	2.30822	4.33507	10.6114	7.59416	9.69635	2.76795	3.53626	1.77445	2.18516	3.36466	9.82835	10.1859	7.6464	1.774	1.63846	0.0738027	0.0485532	0.110443	0.262752	none	none	none
ENSMUSG00000004031	Brinp2	2352	42.448	40.8231	39.7771	26.6422	22.8074	21.3408	33.9058	23.2764	19.8308	9.11223	9.25857	5.1177	2.60663	3.85634	2.98947	5.39287	4.6204	4.7372	3.14233	2.05339	13.4503	12.25	12.9158	4.60288	3.4957	0.861394	0.335524	0.0578793	0.00353386	none	none	none
ENSMUSG00000004032	Gstm5	675	170.016	181.016	189.284	181.51	200.819	229.644	193.754	174.092	131.539	1187.16	1131.24	1672.62	80.4465	67.9325	79.861	7.50068	7.67942	7.38769	10.3787	6.26828	13.1032	13.333	13.1807	7.1177	9.54139	5.86684	5.30138	3.27509	2.57889	GFAP	none	none
ENSMUSG00000004035	Gstm7	657	6.39831	10.7135	7.97007	38.4354	41.0686	34.8286	14.5655	7.9612	6.84265	16.8255	23.4175	20.0385	8.44279	3.45133	4.36009	3.22661	5.2895	3.4316	4.39875	2.68214	9.32828	11.0705	6.60689	3.90689	4.40871	2.86906	1.34088	0.712402	0.261219	none	none	none
ENSMUSG00000004038	Gstm3	657	0	0	0.531338	0	0	0	0	0	0	0	0	0.286264	0	0	0	0.235252	0	0	0.131486	0	NA	NA	NA	0.0285692	0.172061	0.406383	0.108645	0	0	none	none	none
ENSMUSG00000004040	Stat3	2313	22.1725	20.9118	23.3933	17.9936	11.6654	17.2329	33.0984	25.3272	14.8202	68.9576	56.6928	70.6604	100.596	77.9915	96.8258	4.53351	4.05577	4.66762	6.05391	6.53612	11.593	11.1054	11.9526	3.50589	4.49057	1.01526	1.81612	2.09611	1.89694	none	none	none
ENSMUSG00000004043	Stat5a	2394	0.0877964	0.226167	0	0	0	0	0	0	0.469468	1.69624	2.66952	2.59252	3.90233	4.63061	3.91603	0.143595	0	0.209752	1.73093	2.36448	NA	NA	NA	0.545968	1.5294	0.237546	0.890871	0.391445	0.974684	none	none	none
ENSMUSG00000004044	Cavin1	1179	7.30922	5.97012	5.3296	0	1.08979	0	0	2.07032	1.90654	8.41933	12.0457	14.995	1.98095	1.70957	1.98791	2.84859	0.447064	1.21762	3.68032	1.53247	10.2245	6.68565	8.60983	NA	NA	NA	NA	NA	NA	none	none	none
ENSMUSG00000004054	Map3k11	2553	1.07027	0.636244	0.820421	1.83169	1.63564	1.44564	0.832969	0.956093	1.10057	1.8557	3.52311	3.46242	10.4061	8.38838	5.40621	0.881517	1.39926	0.973216	1.98078	3.18061	10.5452	10.9079	11.1506	2.76553	2.64463	1.62931	2.7105	3.18071	2.41135	none	none	none
ENSMUSG00000004056	Akt2	1446	10.7563	11.1085	8.20818	4.85094	4.66495	4.08377	1.47066	2.65263	4.27488	49.3012	59.2562	90.7861	6.05691	10.4542	8.46443	3.46262	2.46812	1.92577	6.0757	3.22113	12.5189	12.1038	11.0794	3.99458	5.56417	0.870258	0.721341	0.12721	0.255376	GFAP	none	none
ENSMUSG00000004069	Dnaja3	1443	49.3781	47.2778	40.8843	48.2862	55.8732	58.8263	59.6854	50.0215	40.8905	25.4835	25.4249	34.4088	30.3475	33.3485	32.3039	5.54988	5.78995	5.67805	4.87966	5.04439	13.28	13.4916	13.6155	4.97269	5.05311	1.69394	1.65143	1.20401	1.21175	none	none	none
ENSMUSG00000004070	Hmox2	948	136.797	136.313	144.717	137.132	145.699	152.612	178.336	186.121	165.978	76.1518	64.168	62.8902	253.448	207.83	224.98	7.13212	7.19128	7.4742	6.10301	7.84394	14.0179	14.352	14.5833	5.75435	5.67261	1.46501	2.3369	2.70386	1.76654	none	none	none
ENSMUSG00000004071	Cdip1	627	448.528	451.059	454.317	434.815	428.287	408.509	468.049	603.413	426.618	340.378	365.428	278.364	95.4518	85.5898	66.0386	8.82114	8.73088	8.96682	8.36219	6.38128	13.9809	14.4067	14.5268	6.32012	6.16859	5.62427	4.32772	3.57732	3.60293	none	none	none
ENSMUSG00000004085	Map3k20	2409	1.30875	1.42347	1.73892	2.32942	2.80013	1.53205	7.06208	8.68495	12.1302	4.49514	4.02847	3.43517	14.3002	8.78521	7.7833	1.31637	1.6873	3.36351	2.31796	3.49692	6.35558	7.02483	9.73391	NA	NA	NA	NA	NA	NA	none	none	none
ENSMUSG00000004096	Cwc15	690	113.622	109.858	126.482	154.522	132.676	124.093	177.214	159.189	212.565	205.982	171.52	174.174	203.937	162.123	165.685	6.8784	7.10954	7.52348	7.53054	7.47774	13.1096	13.3738	13.4534	5.37086	5.7481	3.29177	3.34322	3.00418	3.48806	none	none	none
ENSMUSG00000004098	Col5a3	5220	0	0	0	0.0895845	0	0	0	0	0	1.25333	1.81377	1.04486	0	0.0482658	0	0	0.0424503	0	1.24529	0.0230262	NA	NA	NA	0.163499	0.505891	0.0734485	0.0292297	0	0	GFAP	none	none
ENSMUSG00000004099	Dnmt1	4863	19.5792	20.672	17.8026	14.2318	14.6637	13.9644	7.65268	7.88753	6.70229	5.28858	4.33191	4.02218	16.5092	12.1751	11.5669	4.34705	3.9342	3.07282	2.47185	3.84971	NA	NA	NA	3.35332	3.02148	1.13901	0.602054	0.615823	0.370149	none	none	none
ENSMUSG00000004100	Ppan	1413	9.66879	9.45195	8.64693	7.94278	7.50184	8.3583	6.02001	5.92273	4.37472	4.7898	3.35028	2.92828	9.29754	5.88412	6.63481	3.35838	3.15936	2.68687	2.22942	3.04826	10.1906	10.3598	10.1189	2.83996	2.83323	3.75839	3.93763	4.50042	4.30901	none	none	none
ENSMUSG00000004105	Angptl2	1482	0.28365	0.852475	0.235553	0	0	0	2.86986	2.5882	5.68778	4.71902	6.70802	6.09151	0.196992	0.510015	0.527158	0.543225	0	2.23734	2.77389	0.497115	NA	NA	NA	0.641546	0.665999	0.134497	0.0678539	0.0261446	0	none	none	none
ENSMUSG00000004110	Cacna1e	6822	84.7886	71.8803	67.0341	144.772	129.861	121.184	9.97511	7.92269	11.0381	9.9539	8.08421	4.74186	2.9956	5.20736	3.55009	6.2397	7.05462	3.41214	3.10322	2.29798	12.1032	12.0894	8.62295	3.64847	1.9855	0.0323588	0.00479044	0.00266054	0	none	none	none
ENSMUSG00000004113	Cacna1b	6987	26.5325	23.4545	21.384	24.4959	22.4809	20.7064	4.41323	7.0369	7.23855	3.16427	3.04891	1.5074	1.04459	2.52416	1.75176	4.63171	4.55833	2.85391	1.83735	1.47171	11.0248	10.1533	9.80242	3.46205	1.99035	0.459338	0.120534	0.0158515	0.00753004	none	none	none
ENSMUSG00000004127	Trmt10a	993	2.54	4.18033	5.27325	2.35464	4.20523	0.743345	7.49546	5.61854	3.9614	4.08942	2.62203	3.03042	3.82201	3.80585	3.93378	2.32131	1.78006	2.74239	2.08654	2.27914	8.89764	8.57169	9.1358	1.1635	0.771181	0.608903	0.526054	0.453274	1.33533	none	none	none
ENSMUSG00000004151	Etv1	1434	20.9598	17.9978	17.284	33.9147	39.4239	35.5173	30.4007	36.2318	47.8091	13.8443	12.8748	11.5416	15.0654	12.6501	13.6201	4.30358	5.22053	5.29084	3.78173	3.88543	11.0572	12.7512	10.383	4.2555	3.61353	0.528611	0.131424	0.276987	0.465744	none	none	ExcL5_2
ENSMUSG00000004187	Kifc2	2379	27.2118	26.7801	19.2226	17.8875	16.6076	16.1342	8.49197	10.8465	8.26748	3.69835	4.27826	3.95283	1.4726	5.18933	2.62715	4.66703	4.15999	3.35078	2.31513	2.03434	15.0866	15.0499	14.877	6.86567	5.14105	6.10445	5.39168	2.2008	1.6092	none	none	none
ENSMUSG00000004207	Psap	1674	2799.45	2833.15	2652.58	2045.96	1856.68	1900.47	2879.25	2684.41	2943.71	4316.45	4663.53	4503.36	6246.43	7171.77	6642.17	11.4319	10.9184	11.47	12.1342	12.7073	17.6663	16.6775	17.7556	9.47082	10.6159	3.38739	6.15171	4.94671	4.77522	none	none	none
ENSMUSG00000004221	Ikbkg	1293	30.0728	28.6146	26.1884	30.7414	24.0973	30.2564	37.0053	22.3837	18.2537	24.6014	25.0793	25.3095	31.3844	26.6951	32.829	4.87243	4.87603	4.74851	4.70026	4.96822	11.3859	11.4588	11.3072	2.82375	2.90689	0.728198	0.498	0.900096	1.20064	none	none	none
ENSMUSG00000004231	Pax2	1251	0	0.14427	0	0	0.256767	1.18008	5.09969	2.78738	5.39043	0	0	0	0	0.201397	0	0.0677624	0.564573	2.43984	0	0.093739	NA	NA	NA	0.879706	0.363638	0.205356	0.0151085	0.0182327	0	PV	none	none
ENSMUSG00000004233	Wars2	1083	5.43414	3.83293	5.15736	9.49943	4.44896	6.13414	2.94539	4.1857	3.11331	5.83268	5.90104	6.25182	4.58267	4.42013	5.29008	2.53808	2.94377	2.14235	2.80636	2.52714	7.67238	8.23685	7.86589	1.38957	1.35238	0.0392889	0.0933881	0.176626	0.138961	none	none	none
ENSMUSG00000004263	Atn1	3528	0.0595761	0.15347	0.0989481	0	0	0	0	0	0	0.0639455	0	0.106619	0.1655	0	0	0.142738	0	0	0.0797771	0.0774711	NA	NA	NA	5.60585	5.22548	3.47552	2.85431	2.80792	1.63825	none	none	none
ENSMUSG00000004264	Phb2	900	63.756	56.5508	42.2786	73.2622	53.5358	46.749	54.3457	53.8549	28.722	35.3439	39.9756	43.6753	51.5766	53.7488	40.5092	5.78647	5.87895	5.54352	5.34571	5.6326	13.1287	13.2701	13.5546	5.49442	5.66221	5.22055	5.48797	5.08855	4.35929	none	none	none
ENSMUSG00000004266	Ptpn6	1794	0.820118	0.201205	0	0	0	0	0	0.194371	0	0.377257	0.131938	0.104836	201.789	164.735	204.82	0.422708	0	0.0905692	0.268646	7.58081	NA	NA	NA	0.970854	0.804604	0.760743	4.30743	4.68354	4.54724	Cx3cr1	MG	none
ENSMUSG00000004267	Eno2	1305	1120.18	1040.15	1006.34	1116.22	1075.15	993.805	860.405	837.95	561.953	110.466	88.1494	60.53	59.5071	100.393	55.4756	10.0452	10.0536	9.55925	6.44926	6.18571	16.9391	17.0652	17.415	8.51602	7.39123	6.68585	5.3874	2.96581	0.930174	none	none	none
ENSMUSG00000004268	Emg1	735	20.3035	15.9609	17.5732	16.5421	17.0441	19.0812	49.186	31.7863	26.7597	17.4955	23.5087	21.2385	44.4865	41.1343	49.6031	4.24381	4.2138	5.20596	4.44278	5.5259	11.9484	12.5812	12.8318	4.53978	4.49783	2.6705	3.33539	3.54637	3.20443	none	none	none
ENSMUSG00000004270	Lpcat3	1464	6.02989	4.06822	5.48432	3.51362	5.48523	3.02517	8.71545	3.57275	6.14156	53.6261	55.1324	46.6335	103.696	113.067	107.617	2.6309	2.32424	2.83658	5.72239	6.76986	9.57243	9.13278	8.42005	3.18587	4.4957	0.584486	2.65903	3.26655	2.74573	none	none	none
ENSMUSG00000004285	Atp6v1f	360	248.135	303.309	308.362	305.259	322.107	301.408	256.96	321.58	354.342	270.093	282.064	213.675	351.953	278.542	277.054	8.16793	8.27887	8.28522	8.00156	8.24563	14.3756	14.6076	14.8559	6.48156	6.16256	7.31152	7.26715	6.22146	5.86782	none	none	none
ENSMUSG00000004296	Il12b	1008	0	0	0	0	0	0	0	0	0	0	0	0	0	0.749843	0.258349	0	0	0	0	0.417989	NA	NA	NA	0	0	0	0.0420681	0.103791	0.342477	none	none	none
ENSMUSG00000004317	Clcn5	2451	3.43019	3.46088	2.84854	1.90792	2.09687	1.5058	5.2058	8.67839	8.48317	3.31358	2.80058	2.07182	17.1521	14.2883	17.1061	2.08629	1.5043	3.07994	1.89866	4.10284	8.103	7.25711	10.3401	1.7137	0.842644	0.0122409	0.0263516	0.180726	0.311661	none	none	none
ENSMUSG00000004319	Clcn3	2601	80.9708	77.3689	88.4466	86.1189	84.7187	100.746	113.237	109.128	130.928	133.66	129.678	128.999	22.4485	25.2819	27.9339	6.37959	6.51614	6.89196	7.04198	4.71268	13.7704	13.0516	14.1903	5.37851	5.66865	1.79523	0.706376	1.57791	1.76235	none	none	none
ENSMUSG00000004328	Hif3a	1995	0	0.0904668	0	0	0.16101	0	0	0	0	0.339248	0.474581	1.22555	0.292675	0.252579	0.261069	0.0428623	0.0754231	0	0.748285	0.343435	NA	NA	NA	0.925999	1.68107	0.101331	0.135383	0.154069	0.0572965	none	none	none
ENSMUSG00000004341	Gpx6	666	0.946778	0.270993	0.524158	0	0	0	0	0.523575	0.843773	0.677476	0	0	0	0.378299	0	0.660511	0	0.541795	0.293754	0.171335	NA	NA	NA	0.163499	0	0.062308	0	0	0	none	none	none
ENSMUSG00000004344	Gpx5	666	0	0	0	0	0	0	0	0	0	0	0	0	0	0	0	0	0	0	0	0	NA	NA	NA	0	0	0	0	0	0	none	none	none
ENSMUSG00000004347	Pde1c	2586	0.894057	1.18646	0.539968	0.542495	0.993704	1.14175	37.4164	23.3276	22.5998	2.26821	2.01367	1.52729	1.35472	1.0717	0.906321	0.905731	0.920408	4.84706	1.55404	1.07787	6.40505	7.10258	6.22292	1.63227	1.23061	0.0356535	0.00487068	0.00671798	0	PV	none	none
ENSMUSG00000004356	Utp20	8370	5.02233	5.00259	4.6295	6.70439	7.59863	8.55433	2.03256	3.54117	2.68556	2.53362	2.57341	2.5616	5.44123	3.67235	4.44917	2.55699	3.10754	1.90808	1.83034	2.46491	7.926	8.60092	8.02281	1.57531	1.23061	0.128087	0.181456	0.226655	0.315852	none	none	none
ENSMUSG00000004359	Spic	729	0	0	0	0	0	0	0	0	0	0	0	0	1.20141	0	2.50057	0	0	0	0	1.15962	NA	NA	NA	0	0	0	0	0	0	none	none	none
ENSMUSG00000004360	9330159F19Rik	1947	0.863625	0.741577	0.358592	1.2009	0.494938	0	0	1.07458	1.1545	9.15376	11.4276	10.9155	1.19956	1.55283	0.401258	0.72648	0.646421	0.801594	3.52343	1.03648	13.5759	13.8798	12.591	3.67582	3.0658	1.49007	0.358622	0.0458764	0	GFAP	none	none
ENSMUSG00000004364	Cul3	2307	132.561	147.546	151.469	161.35	193.258	215.971	132.277	144.65	185.612	96.2246	80.7459	73.453	60.1096	57.9905	57.1177	7.1785	7.57889	7.2778	6.40044	5.89254	14.6502	14.5072	14.4407	4.83693	4.69562	0.779539	0.19667	0.807467	0.957199	none	none	none
ENSMUSG00000004366	Sst	351	101.2	71.9868	58.6788	6.66141	6.406	8.41187	212.051	227.5	187.318	91.911	90.3631	66.9784	66.5397	52.3993	56.3864	6.29073	3.02853	7.71394	6.39376	5.89341	10.5675	9.97786	12.4714	7.90737	2.83188	8.45571	6.03539	4.29956	1.19946	none	N	Int_Sst
ENSMUSG00000004371	Il11	600	0	0	0	0	0	0	0	0	0	0.375999	0	0	0	0	0	0	0	0	0.170352	0	NA	NA	NA	0.286881	0.154886	0.156727	0.158018	0.147159	0.100929	none	none	none
ENSMUSG00000004383	Large1	2271	81.8156	78.439	68.8648	96.5737	79.6319	95.5587	113.305	100.879	80.1729	16.4903	15.5297	12.174	19.1543	21.0788	23.5074	6.27376	6.51709	6.63109	3.97557	4.47553	14.4958	14.1835	13.8035	NA	NA	NA	NA	NA	NA	none	none	none
ENSMUSG00000004393	Ddx56	1641	28.5626	28.5954	23.8257	22.7974	29.9487	22.4906	36.2852	15.2995	15.7525	12.7854	11.2507	12.8364	13.5208	13.2038	13.0129	4.80707	4.70481	4.55125	3.73236	3.83247	12.6706	12.7511	12.7247	3.52857	3.81762	2.31979	2.15413	2.30093	1.95267	none	none	none
ENSMUSG00000004394	Tmed4	684	67.296	62.0074	54.609	90.2446	70.4419	79.8575	146.124	142.743	156.098	111.481	121.117	130.883	91.7657	90.6126	77.2873	5.96126	6.34308	7.22228	6.93263	6.45212	13.1671	13.0121	13.3893	5.34199	5.51454	3.09459	3.33816	3.76757	3.56006	none	none	none
ENSMUSG00000004415	Col26a1	1323	0.794349	0.818509	0.791585	0.706925	0	0	0	0	0.849513	0	0.17891	0.426475	0	0.190436	0.393675	0.849183	0.305261	0.359713	0.265191	0.256653	7.49831	4.08922	7.84437	1	0.457682	0.0487932	0.0177248	0	0	none	none	none
ENSMUSG00000004446	Bid	588	20.0176	22.4067	26.1223	13.5199	22.3976	10.0427	25.3163	10.6745	14.3355	5.37142	7.24584	5.75741	89.3703	53.1318	82.8195	4.57585	4.02858	4.15181	2.83287	6.24996	11.1184	10.9666	12.2992	2.15056	1.24286	0.584452	1.23718	1.95636	1.50227	Cx3cr1	none	none
ENSMUSG00000004451	Ralb	621	15.2308	17.1472	12.9292	27.109	17.0694	26.15	51.3664	30.8833	19.0032	33.7855	39.259	32.1031	216.724	202.045	213.03	4.0092	4.61134	5.11898	5.17189	7.72519	9.43884	9.86094	11.1509	3.24184	3.44272	1.04376	2.80369	1.82699	2.55967	Cx3cr1	none	none
ENSMUSG00000004455	Ppp1cc	1014	0.621848	1.6019	0.344269	0.922349	2.21746	0	5.24302	2.06332	4.98775	1.33491	0.700288	0.185479	0.287912	0.745406	0.770462	0.892202	1.03323	2.34994	0.799274	0.679208	12.1109	12.6532	13.7197	1.86394	1.46118	0.288134	0.398767	0.167392	0.186825	none	none	none
ENSMUSG00000004460	Dnajb11	1077	79.8194	81.2752	81.0327	77.7214	85.8959	94.5809	145.128	123.357	139.314	95.728	97.1404	99.3639	160.203	123.283	134.198	6.35243	6.44404	7.09733	6.62074	7.13163	12.8346	12.252	12.5862	4.88557	5.22574	1.35775	2.2258	1.87103	1.86809	none	none	none
ENSMUSG00000004462	Tbccd1	1659	3.9275	3.37246	4.20843	3.66438	3.29153	4.00439	7.69103	3.363	2.37111	5.03146	4.28024	8.27577	4.75133	6.07468	5.49401	2.27385	2.2183	2.45287	2.77873	2.68706	10.2512	10.2625	10.4034	2.49057	2.98914	0.554291	0.724176	0.659893	0.691771	none	none	none
ENSMUSG00000004473	Clec11a	987	0.851812	2.01144	1.06106	2.36895	3.5799	2.24359	3.23187	1.41317	1.13871	0.914284	1.19907	0.381105	0	0	0.263846	1.20671	1.89949	1.54987	0.873016	0.121611	9.35569	9.88094	9.69703	1.4957	0.815575	2.01637	0.621423	0.16786	0.260207	none	none	none
ENSMUSG00000004500	Zfp324	1752	3.59905	3.39947	3.38728	4.2706	3.11681	2.52788	2.42759	1.9903	0	1.1589	1.35101	1.71758	2.66614	3.30753	2.52687	2.15767	2.10605	1.30605	1.26853	1.93867	11.275	11.3797	10.7477	1.78241	1.15056	0.998131	0.865801	1.31214	1.40593	none	none	none
ENSMUSG00000004508	Gab2	2001	4.41167	3.15684	2.96577	3.97288	4.97634	1.10666	3.71964	6.97053	2.52752	9.13222	5.6779	7.98921	50.9186	52.6307	54.9204	2.17358	2.12167	2.43453	3.1043	5.75016	10.2789	10.219	11.7765	2.43296	2.66145	0.100571	0.265707	0.190081	0.329868	Cx3cr1	none	none
ENSMUSG00000004530	Coro1c	1425	42.0369	43.6955	37.7261	57.7565	53.1977	55.9434	76.1088	59.7073	48.111	15.6732	14.451	14.1222	56.5447	52.3343	57.5657	5.39756	5.82356	5.96137	3.97717	5.81971	11.5064	12.0013	12.0811	4.848	4.47725	2.82512	2.87436	1.80932	1.71104	none	none	none
ENSMUSG00000004535	Tax1bp1	2445	140.553	151.545	148.345	131.013	160.148	164.535	83.9321	110.529	120.435	86.2723	82.3842	75.2302	103.643	76.3571	82.9711	7.20764	7.25643	6.72745	6.36274	6.47016	13.051	12.8353	13.2226	5.42626	5.79684	4.22267	4.11132	4.90369	4.70379	none	none	none
ENSMUSG00000004540	Psg17	1428	0	0	0	0	0	0	0	0	0	0	0	0	0	0	0	0	0	0	0	0	NA	NA	NA	0	0	0	0	0	0	none	none	none
ENSMUSG00000004542	Psg19	1428	0	0	0	0	0	0	0	0	0	0	0	0	0	0	0	0	0	0	0	0	NA	NA	NA	0	0	0	0	0	0	none	none	none
ENSMUSG00000004552	Ctse	1194	0	0	0	0	0	0	0	0	0	0	0	0	1.46705	3.58719	2.83535	0	0	0	0	1.85992	NA	NA	NA	0	0.00958605	0	0.0182235	0	0.0161222	Cx3cr1	none	none
ENSMUSG00000004558	Ndrg2	1116	66.4831	53.0447	58.1815	12.5707	12.3766	7.93701	100.993	107.485	88.1198	6403.71	6373.65	9833.68	103.854	92.5613	73.0379	5.91256	3.58032	6.64192	12.88	6.5049	9.94399	10.0942	12.9054	8.90346	11.7381	7.48515	6.35107	3.28117	1.92112	GFAP	none	Astro
ENSMUSG00000004561	Mettl17	1461	4.02818	3.21185	3.82301	2.88068	3.29789	3.53661	10.1889	5.48947	2.69245	2.93388	4.69831	2.9608	5.7949	2.93163	3.38666	2.22887	2.08352	2.83261	2.17983	2.33277	9.93813	10.3662	10.8271	2.47508	2.58175	1.54544	1.3457	1.97955	2.77152	none	none	none
ENSMUSG00000004562	Arhgef40	4581	0.963518	0.70916	0.381018	0.204161	0.490833	0.322262	3.0174	2.20745	2.0854	8.22422	7.02703	9.93544	20.457	15.0145	18.0774	0.752377	0.421248	1.78104	3.23198	4.23647	3.19404	2.86887	7.10826	2.18269	3.37573	1.3214	2.53973	3.43041	3.42556	none	none	none
ENSMUSG00000004565	Pnpla6	4038	8.95289	9.52018	6.82963	9.26461	8.43209	6.76356	23.1721	13.7304	14.0558	9.55363	11.1959	10.7126	3.25345	2.68295	3.67601	3.23791	3.19431	4.16881	3.52198	2.07181	11.8931	11.4753	12.5718	3.20163	3.22239	1.43921	0.639074	0.980249	1.12503	none	none	none
ENSMUSG00000004567	Mcoln1	1743	50.5263	49.7022	56.8797	42.1217	35.1991	37.6906	46.3624	61.8179	47.0712	24.2037	25.666	25.0336	24.7892	20.8149	23.3075	5.73794	5.29782	5.72111	4.69865	4.58319	12.5789	11.7061	12.828	4.71918	4.57087	4.59535	4.47641	4.53222	4.51847	none	none	none
ENSMUSG00000004568	Arhgef18	4218	12.5074	13.0932	13.4902	16.0755	14.0122	17.1498	9.83122	9.259	8.52655	7.86229	6.84615	10.8797	7.33664	7.04831	5.12436	3.81047	4.06573	3.35129	3.25238	2.90749	12.126	12.5192	12.0218	3.488	3.59455	0.491474	0.359703	0.428244	0.375559	none	none	none
ENSMUSG00000004591	Pkn2	2952	5.34006	5.07451	6.26752	5.06917	5.76707	5.75111	7.56402	11.9305	11.6122	21.1691	20.0455	20.3239	15.5268	13.2289	10.4978	2.71385	2.70689	3.50702	4.42712	3.81604	9.96595	10.0043	10.107	2.41684	2.74129	0.209859	0.144446	0.332387	0.654341	none	none	none
ENSMUSG00000004609	Cd33	1212	0	0.446736	0	0	0	0	0	0	0	0.186138	0.195295	1.3966	252.198	256.936	270.73	0.200268	0	0	0.671454	8.02766	NA	NA	NA	1	0.545968	0.551429	3.28649	4.32311	4.61009	Cx3cr1	MG	none
ENSMUSG00000004610	Etfb	768	8.75769	6.81505	4.54543	14.0046	5.01898	0.961122	27.6897	9.08075	8.0488	19.975	27.738	37.9579	11.7842	10.1698	14.2415	2.94599	2.93764	3.99456	4.88543	3.70765	NA	NA	NA	4.97911	7.06091	3.16946	4.17984	3.40675	2.75018	none	none	none
ENSMUSG00000004612	Nkg7	498	0	0	0	0	0	0	0	0	0	0	0	0	0	0	0	0	0	0	0	0	NA	NA	NA	0.0285692	0.0565835	0	0.66613	0	0	none	none	none
ENSMUSG00000004626	Stxbp2	1783	1.41459	3.13792	1.95787	3.14726	2.342	1.65595	2.98173	0.391139	0.315173	0.126528	1.46028	0.210965	27.3441	25.5763	33.5927	1.66454	1.75777	1.15662	0.677401	4.89906	8.29347	8.90268	7.35243	1.73118	1.09311	1.3675	2.50744	2.89955	2.79592	Cx3cr1	none	none
ENSMUSG00000004630	Pcp2	411	0	0	0	0	0.781545	28.7355	5075.83	4918.29	4095.01	17.016	23.0362	16.0162	32.6749	10.4212	21.543	0	3.43816	12.1976	4.29935	4.49482	NA	NA	NA	7.01748	2.5025	7.41911	5.56681	3.86088	0.593482	PV	none	none
ENSMUSG00000004631	Sgce	1422	30.3009	36.9339	39.7696	36.174	33.8834	35.817	26.9186	24.0314	31.6148	57.9071	59.0911	52.7722	143.713	145.463	147.24	5.19646	5.18156	4.83398	5.84775	7.19448	11.1744	10.6797	10.9415	3.81967	4.74452	2.21032	3.56204	4.96188	4.36309	none	none	none
ENSMUSG00000004633	Chn2	1407	18.3743	14.8798	18.6082	5.31777	3.42447	8.91856	260.72	164.065	219.669	9.13943	6.56091	5.61419	52.9108	42.0808	50.8987	4.19278	2.78386	7.75367	3.01878	5.63314	11.0369	9.67244	11.0773	6.12722	5.72192	2.67411	2.37738	1.96629	2.09117	none	none	Olig
ENSMUSG00000004637	Wwox	1245	14.1811	13.7717	16.8236	10.8926	9.80415	5.92885	28.1834	33.6097	22.5684	12.3219	15.7798	13.8979	9.61418	8.29706	6.27509	3.99326	3.30381	4.86396	3.90688	3.17985	9.37508	9.27136	10.9036	3.68706	3.58416	2.03635	1.06894	0.842121	0.456009	none	none	none
ENSMUSG00000004642	Slbp	828	47.9769	45.7742	45.5333	30.4977	32.587	43.6823	101.449	91.8077	107.911	31.6057	26.0138	26.1216	89.9099	71.5068	71.0798	5.56767	5.19334	6.66376	4.85368	6.2946	11.2508	11.1233	12.6927	3.14405	2.83458	0.513052	0.233661	0.942208	1.31518	none	none	none
ENSMUSG00000004651	Tyr	1602	0	0.11266	0	0	0	0	0	0	0	0	0	0	0	0	0	0.0531855	0	0	0	0	NA	NA	NA	0	0	0	0	0	0	none	none	none
ENSMUSG00000004654	Ghrhr	1272	0	0	0	0	0	0	0	0	0	0	0	0.147858	0	0	0	0	0	0	0.069408	0	NA	NA	NA	0	0	0	0	0	0	none	none	none
ENSMUSG00000004655	Aqp1	810	0	0	0.430974	0	0	1.82257	1.3127	0.430495	0	0	2.33775	1.39315	0	0.622092	1.28601	0.193656	0.68484	0.660896	1.16584	0.710202	NA	NA	NA	0.0840643	0.278976	0.81907	0.323128	0.0606119	0.0320241	none	none	none
ENSMUSG00000004661	Arid3b	1707	0.738786	0.951571	1.02252	0.273949	0.37635	0.864841	0	0.204277	0.329205	0.264323	0.277326	0.550895	5.47286	5.16588	6.40743	0.929255	0.589808	0.236128	0.448035	2.74029	8.58507	7.68866	6.49341	1.20163	0.519374	0.17815	0.556291	0.923785	1.40065	Cx3cr1	none	none
ENSMUSG00000004665	Cnn2	918	1.1448	0.196603	0.760542	10.6974	6.99815	7.23669	0	0.759696	0	16.2196	14.6969	24.1753	32.4381	29.9153	36.5944	0.766084	3.2189	0.325654	4.2753	5.08673	4.83063	8.13279	7.42194	1.70487	1.99759	1.50184	3.75857	3.35495	2.62256	none	none	none
ENSMUSG00000004667	Polr2e	633	156.393	145.411	156.621	135.192	131.937	123.607	85.6675	87.5883	79.8985	83.7534	96.4738	84.6785	153.12	134.531	137.819	7.26499	7.03612	6.41591	6.48062	7.15809	13.0361	13.3582	12.4891	5.44626	5.44604	5.21786	5.75446	5.72685	4.98995	none	none	none
ENSMUSG00000004668	Abca13	15105	0.0139149	0.0119484	0.0462216	0	0	0	0	0	0.0372031	0.0298709	0.0470104	0.124512	0.154621	0.150118	0.0689616	0.0342556	0	0.0177809	0.0937374	0.169369	NA	NA	NA	0	0	0	0	0	0	none	none	none
ENSMUSG00000004677	Myo9b	6387	0.789797	0.565152	0.71053	0.36608	0.402336	0.115569	0.665905	0.436763	0.263952	3.35556	3.44651	3.15079	14.2155	13.5697	14.189	0.755736	0.372575	0.541554	2.11024	3.90606	10.1421	10.7283	11.0751	2.1375	2.21826	0.310283	0.823007	0.64898	0.999189	Cx3cr1	none	none
ENSMUSG00000004698	Hdac9	3204	24.8627	24.2782	24.0789	21.0171	24.3618	22.5774	12.2789	10.0126	12.4528	7.60448	7.75694	6.63312	10.8431	11.638	9.8347	4.66713	4.5639	3.65322	3.05858	3.55728	12.3862	12.5929	11.514	2.70929	1.89789	0.0143264	0.00192956	0.0159469	0.0168912	none	none	none
ENSMUSG00000004707	Ly9	1965	0.213928	0	0.177653	0	0	0	0	0	0	0	0.120457	0.0957127	26.4457	30.1311	25.8428	0.176996	0	0	0.100381	4.83153	NA	NA	NA	0.214125	0.189034	0.19456	1.97582	2.62574	1.82274	Cx3cr1	none	none
ENSMUSG00000004709	Cd244a	1194	0.176034	0	0.292369	0	0	0	0	0	0	0	0	0	2.44508	1.05506	1.09052	0.209309	0	0	0	1.33926	NA	NA	NA	NA	NA	NA	NA	NA	NA	Cx3cr1	none	none
ENSMUSG00000004730	Adgre1	2796	0.751733	0.451849	0.249706	0	0	0	0	0	0	0.24206	0	0.269064	284.843	382.156	346.663	0.569908	0	0	0.22697	8.40466	NA	NA	NA	1.42223	1.02385	0.0965192	1.19466	2.57041	1.79683	Cx3cr1	none	none
ENSMUSG00000004748	Mtfp1	501	139.704	120.321	126.815	119.475	139.77	122.287	137.951	145.466	108.801	67.9951	65.6705	60.8148	8.15808	11.5664	6.75731	7.02177	7.002	7.04154	6.0406	3.29679	13.9168	14.2604	14.6465	5.26153	4.91648	4.8073	4.31152	2.76367	1.8145	none	none	none
ENSMUSG00000004768	Rab23	714	31.7926	28.8163	36.1801	29.4725	31.4917	47.5554	22.3379	20.5118	23.6115	54.3461	45.7482	40.0385	11.8576	9.88029	6.56512	5.05585	5.21619	4.53317	5.57625	3.38327	10.5121	10.3636	9.85461	2.95233	3.17845	1.13622	0.534254	0.409842	0.48854	none	none	none
ENSMUSG00000004771	Rab11a	651	404.226	472.966	530.336	331.867	432.234	420.662	395.261	531.889	530.014	302.532	244.333	213.788	286.113	224.856	228.814	8.87706	8.62907	8.92695	7.99181	7.95184	15.019	14.6041	15.086	5.46336	5.18428	1.831	1.93644	3.13402	2.47708	none	none	none
ENSMUSG00000004788	Eif2b2	1056	37.4192	36.4039	31.0742	32.3268	30.7223	25.8629	44.3035	41.9365	17.0289	24.5681	28.0182	31.3459	26.8167	20.0413	21.7014	5.16855	4.93722	5.14661	4.85686	4.57611	12.0022	12.0711	11.9708	4.21723	4.72319	2.75412	2.66197	3.05548	2.62868	none	none	none
ENSMUSG00000004789	Dlst	1365	81.4562	90.5712	93.6019	93.1836	95.7762	97.3374	93.4756	139.991	118.566	73.2166	69.7087	81.1549	61.5967	51.1278	48.4584	6.48451	6.59145	6.88685	6.2421	5.7742	13.8623	13.9784	14.792	5.5735	5.78084	6.15894	5.36781	5.19616	4.86453	none	none	none
ENSMUSG00000004791	Pgf	489	0.429825	2.58358	2.85553	6.6941	3.94129	7.54746	4.34881	6.4178	5.74594	17.0699	21.782	18.846	1.19404	0.51523	0	1.5638	2.81986	2.70137	4.33861	0.650541	7.67345	9.681	7.70286	1.27501	2.34293	0.965063	0.701491	0.0657531	0	GFAP	none	none
ENSMUSG00000004798	Ulk2	3114	20.1815	21.5024	22.0843	23.2764	19.3926	18.015	10.585	9.51816	8.66208	15.2138	14.5941	12.2001	36.1882	32.6059	35.5417	4.47613	4.4079	3.40442	3.90715	5.16102	14.0814	13.9789	13.0458	4.23879	3.91902	0.585041	0.692137	0.983221	1.50187	none	none	none
ENSMUSG00000004814	Ccl24	360	0	0	0	0	0	0	0	0	0	0	0	0	38.9257	29.3939	25.3182	0	0	0	0	5.00955	NA	NA	NA	0.214125	0.0191088	0.131643	2.96294	1.33815	1.49505	Cx3cr1	none	none
ENSMUSG00000004815	Dgkq	2805	7.86787	7.65678	5.47591	8.33567	6.18382	5.5262	8.71855	8.20472	4.80815	1.68898	1.35015	1.8774	1.45711	2.06588	1.3926	3.00003	2.94146	3.04331	1.39991	1.39973	10.0191	10.1441	11.2634	3.08066	2.20372	1.68167	0.843162	0.585617	1.07269	none	none	none
ENSMUSG00000004821	Tmed11	648	0	0	0	0	0	0	0	0	0	0	0	0	0	0	0	0	0	0	0	0	NA	NA	NA	0	0	0	0	0	0	none	none	none
ENSMUSG00000004837	Grap	654	0.642766	0.275965	0.533775	0	0	0	0	0	0	1.37981	0	0	436.129	286.234	291.873	0.569655	0	0	0.545907	8.40548	3.9958	3.92224	6.45702	1.41143	0.895303	0.540522	4.34695	2.86273	2.47311	Cx3cr1	none	none
ENSMUSG00000004842	Pou1f1	954	0	0	0	0	0	0	0	0	0	0	0	0	0	0	0	0	0	0	0	0	NA	NA	NA	0.0285692	0	0	0	0	0	none	none	none
ENSMUSG00000004843	Chmp2b	642	125.063	140.562	153.882	156.605	156.104	142.569	155.683	169.462	222.33	114.908	102.864	77.9253	119.142	101.25	128.586	7.13787	7.25512	7.51957	6.63758	6.87438	14.0625	13.7841	13.911	4.7137	4.28293	1.03987	0.711513	1.22652	1.06352	none	none	none
ENSMUSG00000004846	Plod3	2226	12.0861	10.1348	9.87988	10.7139	11.977	9.6164	13.8523	10.6521	10.8553	31.5191	32.4316	29.5716	148.726	163.777	134.537	3.54847	3.55693	3.67656	5.00783	7.22895	NA	NA	NA	3.07724	3.96101	2.14818	4.6406	5.58292	4.42796	Cx3cr1	none	none
ENSMUSG00000004849	Ap1s1	567	420.74	494.334	474.071	445.363	413.557	403.57	174.401	158.668	130.825	124.537	105.199	90.8866	126.663	115.531	116.659	8.85813	8.72052	7.28199	6.75321	6.9143	15.5137	15.7572	14.6609	7.06437	6.09873	5.75065	5.3885	3.32447	2.50532	none	none	none
ENSMUSG00000004864	Mapk13	1101	0.954517	0.491774	0.634131	0	0	0	7.72596	1.58356	4.08322	0	0	0.170822	0	0	0	0.759986	0	2.45002	0.0798946	0	NA	NA	NA	0.895303	0.78799	0.347597	0.16318	0.0670396	0.0354573	PV	none	none
ENSMUSG00000004865	Srpk1	1947	40.0506	44.1238	44.1068	35.7869	32.5009	42.4612	26.7596	27.7599	26.5535	8.11093	8.63149	8.69378	15.1444	16.1754	16.0503	5.45155	5.24475	4.80861	3.24469	4.06953	11.828	11.5406	11.6393	3.75275	2.7754	1.82567	1.72399	1.76798	2.09601	none	none	none
ENSMUSG00000004872	Pax3	1455	0	0	0	0	0	0	0	0	0	4.49649	5.04304	6.07529	0	0.346319	0	0	0	0	2.63342	0.157613	NA	NA	NA	0.565597	1.54597	0.011914	0	0	0	GFAP	none	none
ENSMUSG00000004880	Lbr	1881	2.12308	3.74203	3.89733	1.98886	4.95228	3.13936	5.65276	5.93218	5.07879	4.55757	3.52341	4.19945	36.163	32.5482	32.2578	2.08887	2.12438	2.7125	2.34865	5.11505	7.53504	7.16165	7.51236	2.07039	1.5294	0.268244	0.126878	0.901871	1.34309	Cx3cr1	none	none
ENSMUSG00000004885	Crabp2	417	1.00808	0.432809	0.837144	1.12142	0	0	0	4.18106	1.34761	2.16403	0.56762	0.902041	0	1.20838	3.1225	0.815038	0.458178	1.50736	1.14485	1.28902	4.55357	4.46084	5.81157	1.21412	0.180572	0.903626	0.618854	0	0.0810191	none	none	none
ENSMUSG00000004891	Nes	5595	0.413232	0.451606	0.436751	0	0	0.131929	0	0.124647	0.60263	0.927398	0.930714	0.638683	4.2787	3.55743	4.14246	0.519907	0.0620889	0.31316	0.873628	2.31987	8.96715	7.65233	9.52068	0.526069	0.793549	0.260709	0.500418	0.438003	0.178744	Cx3cr1	none	none
ENSMUSG00000004892	Bcan	2652	8.00477	6.53326	5.66019	16.7515	10.6587	10.5767	38.089	37.079	26.4872	788.918	874.317	957.965	7.37563	7.41022	7.56111	2.95098	3.77213	5.12454	9.7727	3.07878	8.68067	10.3906	12.3549	5.66562	8.81871	4.65589	2.88404	1.09672	0.188964	GFAP	none	none
ENSMUSG00000004894	Hapln2	1026	0.819433	0.527723	0.340243	0	0.313075	0	0	0	1.64314	0.879531	3.22979	2.0164	2.27636	1.9645	0.253817	0.643825	0.143208	0.630137	1.60498	1.3209	2.80839	3.92401	6.19601	2.65992	2.53439	3.17885	1.95284	0.361241	0	none	OL	Olig
ENSMUSG00000004895	Prcc	1476	13.3857	16.6297	15.6097	15.8412	13.928	9.00173	24.493	25.7509	23.2243	7.33657	9.14075	7.3905	16.0213	15.5333	15.1733	4.01867	3.79946	4.67183	3.16285	4.05102	12.9432	13.0735	13.0047	4.44626	4.58536	0.157324	0.357876	0.173002	0.16211	none	none	none
ENSMUSG00000004896	Rrnad1	1428	6.62346	7.07769	6.84488	8.84176	7.19809	5.16906	6.70137	4.1512	3.14819	3.31764	4.47537	3.29264	1.02221	2.64651	1.64128	2.97245	3.0125	2.50257	2.23119	1.46988	8.91673	9.2564	9.17314	3.20477	3.39048	1.69035	0.880082	1.78319	3.17767	none	none	none
ENSMUSG00000004897	Hdgf	714	74.7716	71.0297	76.7605	103.481	65.6826	67.1978	119.136	97.6753	106.252	90.0503	98.4582	93.2475	70.328	61.7518	70.7574	6.23242	6.31809	6.76404	6.56862	6.1004	13.4999	13.7227	13.5878	6.08364	5.93011	4.51686	4.08914	3.61593	3.05894	none	none	none
ENSMUSG00000004902	Slc25a18	963	5.45651	3.74831	1.81251	1.94239	0.333557	0	12.1455	7.24197	7.00253	471.581	448.816	558.758	6.66951	7.84883	4.59717	2.22418	0.814468	3.29229	8.94852	2.88202	5.41101	6.19475	8.32515	5.56925	8.52604	1.46461	1.07288	0.0771103	0.111679	GFAP	none	none
ENSMUSG00000004929	Thop1	2064	39.0023	37.3379	27.2303	30.8129	30.1917	23.961	15.9699	17.5702	7.62339	8.74417	6.99542	10.5701	8.06238	7.32405	4.2898	5.1507	4.87391	3.87982	3.28834	2.91815	13.3564	13.3658	12.3895	3.84398	4.10825	2.64101	1.35844	1.24419	0.850338	none	none	none
ENSMUSG00000004931	Apba3	1716	3.18462	2.31386	2.64461	2.1801	1.49751	4.30153	4.33741	3.25129	1.63739	5.52167	5.65536	7.56247	4.93377	4.84514	3.18691	1.89312	1.87173	2.02693	2.85728	2.41195	NA	NA	NA	2.73118	3.39323	1.40906	1.68753	1.6205	1.48758	none	none	none
ENSMUSG00000004933	Matk	1518	38.6308	36.1438	28.0559	52.9859	38.9351	22.8542	7.70496	5.97248	4.07212	4.30987	3.4304	2.35404	15.3857	17.2612	22.6449	5.14065	5.29493	2.79005	2.12591	4.28026	13.8966	14.2441	13.1465	5.16993	3.98732	5.74243	5.40993	4.64919	4.98863	none	none	none
ENSMUSG00000004934	Pias4	1524	15.9983	15.8691	11.4531	12.5806	10.9601	10.6556	11.1631	10.5251	8.11218	5.62519	6.05722	6.54068	11.4938	6.94343	10.5944	3.94861	3.63213	3.45068	2.8226	3.41646	10.9808	11.0976	10.9652	3.30159	3.08633	2.72272	1.46685	2.57184	2.14167	none	none	none
ENSMUSG00000004936	Map2k1	1182	402.587	396.54	358.244	382.571	387.795	386.557	250.079	181.136	141.201	125.206	134.97	101.516	185.737	192.904	213.268	8.59541	8.59485	7.5835	6.92557	7.63156	15.5788	15.7032	13.3988	6.7021	6.34092	1.72095	1.10531	1.45446	1.38921	none	none	none
ENSMUSG00000004937	Sgta	948	132.807	139.74	119.309	120.854	136.889	96.5502	151.417	118.441	75.2827	74.9619	72.4074	97.6088	61.5913	60.5949	56.0389	7.04022	6.896	6.85856	6.36911	5.91668	13.6131	13.8175	13.8115	6.04396	6.16618	4.27652	4.16027	3.39614	2.98001	none	none	none
ENSMUSG00000004939	Nmrk2	588	0	0	0	0	0	0	0	0	0	0	0	0	0	0	0	0	0	0	0	0	NA	NA	NA	0	0.00958605	0.106502	0.0747191	0	0	none	none	none
ENSMUSG00000004945	Tmem242	423	40.745	40.5336	38.7877	29.8488	26.5781	26.1752	70.3829	78.3134	66.4247	78.9332	73.863	102.263	15.1838	20.8467	15.391	5.35833	4.83461	6.18402	6.4266	4.18114	12.5029	12.6701	13.7577	5.2555	5.09845	2.27099	2.27155	1.4344	0.873018	none	none	none
ENSMUSG00000004947	Dtx2	1860	3.84208	3.20209	3.00292	1.7599	2.76314	1.5874	2.28663	2.06221	1.51063	1.33419	2.79965	1.71897	4.70876	2.4382	4.20026	2.12069	1.60256	1.56226	1.56117	2.25774	10.0905	9.95775	9.80359	1.87971	2.13969	1.51883	2.34063	2.50877	1.7274	none	none	none
ENSMUSG00000004948	Zp3	1275	0	0	0	0	0	0	0	0	0	0.176941	0.185645	0.14751	0	0	0	0	0	0	0.226548	0	NA	NA	NA	0	0.0191088	0	0	0	0	none	none	none
ENSMUSG00000004951	Hspb1	630	0	0.572956	0	0	0	0	3.37551	2.21397	0.891989	0	0	0.895597	0	0	0	0.252156	0	1.66015	0.376882	0	4.19404	4.18868	5.4319	1.1635	0.765535	3.21942	2.13035	1.05318	2.42862	none	none	EndoSM
ENSMUSG00000004952	Rasa4	2409	0.610748	0.524437	1.4491	0	0	0.30641	1.32414	3.18448	1.86618	0.561892	0.294766	0.936864	11.6341	14.7466	19.0258	0.896411	0.140303	1.64383	0.676124	4.01217	NA	NA	NA	1.34483	1.16779	0.86374	1.95264	2.72891	2.71741	Cx3cr1	none	none
ENSMUSG00000004961	Syt5	1161	307.945	317.125	295.267	308.935	290.228	247.319	25.6434	13.2152	14.0367	41.972	44.8522	22.0312	12.8244	18.6628	12.7853	8.26575	8.14548	4.21969	5.22053	3.97796	14.197	13.8193	10.1992	6.18785	5.01287	5.2282	3.49378	1.29462	0.858271	none	none	none
ENSMUSG00000004980	Hnrnpa2b1	1062	423.734	435.738	474.327	588.282	646.362	645.7	475.575	523.379	682.598	468.618	368.865	401.476	673.228	525.958	498.028	8.7996	9.29412	9.13319	8.69344	9.14654	15.7066	15.992	15.3494	6.37643	7.02178	3.16844	3.65964	4.57262	6.54973	none	none	none
ENSMUSG00000004988	Fxyd4	300	0	0	0	0	0	0	0	1.16234	0	0	0	0	0	0	0	0	0	0.472431	0	0	NA	NA	NA	0.263034	0.0473057	0	0	0	0	none	none	none
ENSMUSG00000004994	Ccdc130	1158	12.1609	9.66307	11.7569	14.5378	9.43118	8.28657	3.67283	9.33482	3.88223	3.89637	6.13206	6.49656	7.56329	5.43928	8.32073	3.60806	3.55481	2.729	2.70229	3.0193	10.2422	10.4616	9.65865	1.87184	2.11991	0.719624	1.03728	1.44	1.43281	none	none	none
ENSMUSG00000004996	Mri1	1110	6.62744	8.94276	7.54787	11.3748	10.4178	7.97991	6.7054	6.91118	7.59396	6.09729	6.18399	7.96356	8.15336	12.7109	11.0266	3.12201	3.44945	3.0126	2.95388	3.53981	9.33844	9.57832	9.28485	1.83188	2.14187	1.13441	2.12407	2.50865	1.92927	none	none	none
ENSMUSG00000005034	Prkacb	1197	480.598	460.476	472.16	301.597	311.018	309.563	252.275	226.35	247.879	139.28	118.843	95.059	151.459	129.236	143.805	8.88288	8.26862	7.92581	6.89151	7.15482	15.4293	14.7169	15.6949	7.03936	5.85217	3.25171	1.58977	1.18452	0.913162	none	none	none
ENSMUSG00000005043	Sgsh	1509	2.2286	1.79405	1.15669	0.929684	1.49006	0	5.63703	6.23918	5.21361	11.5117	11.1369	12.7129	17.2186	23.2079	27.9572	1.44702	0.853263	2.74343	3.67662	4.57256	6.91722	6.14279	4.0183	1.79077	2.61667	0.756113	2.52434	2.56112	1.6839	none	none	none
ENSMUSG00000005045	Chd5	5859	41.2907	33.5765	30.8037	28.7331	27.2476	23.5591	12.3406	9.04634	7.48119	4.043	3.8783	2.76062	1.84364	3.22513	2.31126	5.17886	4.78206	3.40908	2.18924	1.79078	14.4931	14.4095	14.4197	4.66221	3.1188	2.2645	1.02029	0.139785	0.0679875	none	none	none
ENSMUSG00000005054	Cstb	297	104.031	126.398	95.2061	113.365	129.784	111.84	239.866	311.13	319.764	214.965	164.971	192.508	345.023	293.514	276.199	6.77538	6.89881	8.18613	7.58357	8.25697	11.713	12.0378	12.8738	5.10936	5.4957	5.33426	5.97415	5.9818	4.92289	none	none	Micro_1
ENSMUSG00000005057	Sh2b2	1866	0.563196	0.870488	1.12247	0.501212	0.688564	0	0	0.934353	0.602307	1.5717	1.52217	2.92293	9.54368	12.5569	14.7932	0.889125	0.481911	0.596668	1.58765	3.73313	8.66704	7.82994	9.06315	1.53605	1.69004	0.355726	1.87867	2.54774	1.97716	Cx3cr1	none	none
ENSMUSG00000005069	Pex5	1920	26.3825	32.9942	28.5453	26.5478	26.4333	21.9136	23.2593	25.7893	22.8293	11.985	13.1909	14.4975	14.141	12.991	11.3932	4.9216	4.69849	4.64151	3.8303	3.79095	13.1104	12.8343	13.7363	4.12267	4.1635	1.4694	0.818003	0.662861	0.464176	none	none	none
ENSMUSG00000005078	Jkamp	936	58.1601	54.5686	49.6035	66.9472	62.4585	55.9915	65.8873	107.665	105.666	49.4102	59.1743	54.2525	35.869	29.6092	34.4996	5.78426	5.97267	6.55571	5.78866	5.10123	11.8779	11.5432	11.9645	4.50716	4.2555	2.5878	1.86356	3.33602	2.90667	none	none	none
ENSMUSG00000005087	Cd44	2343	2.96035	2.07981	0.744962	0	5.48382	0.630083	1.81525	0.44648	0.959373	32.3523	42.6318	35.7207	6.72852	6.02179	4.44586	1.5501	1.60311	1.05221	5.24419	2.75105	7.08475	7.08622	3.92635	1.01436	1.93357	0.0482438	0.0173055	0.0573085	0.0217982	GFAP	none	none
ENSMUSG00000005089	Slc1a2	1719	667.847	590.79	680.51	289.719	273.378	242.612	118.143	113.597	111.475	17025.6	18648.3	18945	168.814	196.838	169.218	9.33847	8.07452	6.85056	14.1522	7.48615	13.2348	11.8491	11.1114	7.71809	10.3269	3.17746	1.35991	0.577466	0.147735	GFAP	AS	Astro
ENSMUSG00000005102	Eif2ak4	4947	3.65391	3.46588	3.24603	4.25377	4.73998	4.17788	4.94351	4.01778	4.203	2.91861	1.77033	2.39514	2.65564	4.07435	3.10583	2.15551	2.43043	2.42978	1.74904	2.09714	11.0273	11.6953	12.9403	2.18903	1.65382	0.071655	0.0444649	0.0643329	0.314649	none	none	none
ENSMUSG00000005103	Wdr1	1821	155.474	164.524	153.361	194.91	208.146	226.185	129.042	99.7655	73.7544	118.065	118.024	140.773	287.775	231.609	263.276	7.31095	7.71937	6.67036	6.98437	8.0328	14.6479	15.0675	13.447	5.853	6.18481	4.65259	5.31712	5.16898	4.09854	none	none	none
ENSMUSG00000005107	Slc2a9	1617	0	0	0	0.86759	0.595946	0	0	0	0	0.279035	0.731903	0.814179	3.61092	2.49299	3.54308	0	0.573225	0	0.685601	2.07576	NA	NA	NA	0.356144	0.31034	0.00509891	0.219341	0.0915111	0.116402	Cx3cr1	none	none
ENSMUSG00000005124	Ccn4	1104	2.09423	1.30783	1.89722	0.423579	0	0	0	0.947556	0.509015	0	0.4288	0	0	0	0	1.46803	0.190543	0.570972	0.192741	0	7.28619	2.09832	7.70626	NA	NA	NA	NA	NA	NA	none	none	none
ENSMUSG00000005125	Ndrg1	1185	15.6086	11.5752	11.489	17.7581	21.9565	29.2765	4.48643	5.29672	4.74222	11.2324	20.9732	7.77696	12.0719	10.8433	10.7683	3.79607	4.58478	2.54641	3.84072	3.6121	10.2135	11.7488	8.31009	5.17073	5.96023	1.87483	1.00198	0.0929759	0.087364	none	OL	Olig
ENSMUSG00000005131	4930550C14Rik	948	0.221714	0.190381	0	0	0	0	0	0	0	3.33164	3.49553	1.98392	0.307957	0.265767	1.3735	0.185695	0	0	1.97711	0.721658	NA	NA	NA	0.263034	0.471621	0	0	0	0.0192844	none	none	none
ENSMUSG00000005142	Man2b1	3042	29.7105	22.2487	22.7218	25.3646	19.218	18.1988	26.2151	27.6255	22.9067	23.88	23.6542	25.967	1072.38	1263.96	1110.06	4.69453	4.45464	4.7324	4.67245	10.1672	11.6089	10.6908	11.4176	3.28983	3.46902	2.24158	5.85869	6.71692	5.69465	Cx3cr1	none	none
ENSMUSG00000005148	Klf5	1341	17.0844	16.0159	14.0573	15.6923	17.965	13.761	4.75743	3.64042	2.93339	1.17763	2.64762	0.701251	1.08853	1.50304	0.194196	4.06343	4.07092	2.25613	1.32702	0.947545	9.77794	10.2995	9.59403	1.68706	0.559084	1.53875	0.470825	0.131558	0	none	none	Int_Sst
ENSMUSG00000005150	Wdr83	948	16.4068	10.0902	9.20593	9.86563	12.198	3.11452	20.1889	10.2992	5.92777	9.75695	6.99106	8.53085	5.85118	12.2253	8.79042	3.68941	3.23154	3.71574	3.23669	3.31551	11.323	11.3235	11.5255	3.71589	3.84733	3.07076	3.03185	2.48063	2.41096	none	none	none
ENSMUSG00000005161	Prdx2	597	310.524	317.127	305.234	285.122	287.318	358.561	694.608	490.634	416.052	389.981	369.518	497.754	136.436	121.964	116.468	8.28522	8.28232	9.06276	8.71454	6.97677	14.5217	14.8246	15.52	7.24146	8.08282	5.80778	5.19492	4.58465	3.99961	none	none	none
ENSMUSG00000005198	Polr2a	5913	29.7877	31.1027	30.2863	35.3511	35.3103	34.3293	23.3768	22.3503	13.7803	20.6409	17.6132	22.1696	40.8315	35.1099	37.8315	4.97234	5.1698	4.38099	4.40199	5.2826	12.7975	12.6552	12.3103	3.848	3.76199	1.88782	1.87538	2.49702	1.81317	none	none	none
ENSMUSG00000005202	Shbg	1212	0	0	0	0	0	0	0	0	0	0.186138	0	0	0	0	0	0	0	0	0.0868464	0	NA	NA	NA	0	0.00958605	0	0	0.223674	0	none	none	none
ENSMUSG00000005204	Senp3	1707	19.9472	18.7142	14.5198	12.6017	13.1723	12.5402	7.47476	11.031	8.23012	6.74024	5.9625	8.92449	8.20929	9.88897	6.71255	4.22705	3.7836	3.30917	3.03722	3.21261	13.3281	13.789	13.3609	4.42626	3.98307	2.6922	2.66918	2.8962	2.93301	none	none	none
ENSMUSG00000005220	Corin	3342	0	0	0	0	0	0.441737	26.4071	17.2159	17.1512	0	0.14165	0.0562763	0	0.301553	0	0	0.198174	4.40994	0.0921743	0.138182	NA	NA	NA	0.526069	0.0285692	0.00769773	0	0	0	PV	none	none
ENSMUSG00000005225	Plekha8	1560	2.15574	3.12371	1.56642	3.59716	3.70633	2.36584	5.45274	2.68231	5.04317	0.723076	0.910375	0.482245	3.74286	2.26107	1.33547	1.71456	2.07831	2.43102	0.769968	1.78512	9.33394	9.50818	10.0325	2.07724	0.920928	0.126093	0.0525004	0.0437147	0.152215	none	none	none
ENSMUSG00000005232	G6pc2	1068	0	0	0	0	0	0	0	0	0	0	0	0	0	0	0	0	0	0	0	0	NA	NA	NA	0	0	0	0	0	0	none	none	none
ENSMUSG00000005233	Spc25	681	0.925923	1.0601	1.53784	1.37337	0.943363	1.08391	0	0.512042	0.825188	1.98766	1.04272	1.65705	6.85916	5.5495	3.82403	1.12076	1.09325	0.531811	1.35754	2.68053	5.23375	5.41078	6.21315	0.238787	0.457682	0.0868488	0.204836	0.204681	0.414291	none	none	OPC
ENSMUSG00000005237	Dnah2	13389	0.0784915	0.0673991	0.0521456	0.174633	0.0959638	0.165391	0	0.0520876	0.0839425	0.320143	0.22982	0.379269	0.0436094	0.0188175	0.01945	0.0922238	0.195762	0.0639769	0.389285	0.0388467	NA	NA	NA	0.137504	0.0840643	0.00704926	0	0	0.00469315	none	none	none
ENSMUSG00000005251	Ripk4	2361	0.267071	0.152885	0.147856	0.198065	0.272101	0	0	0.147692	0	0.0955526	0.100253	0.0796592	0	0	0	0.250077	0.210042	0.0693319	0.126737	0	NA	NA	NA	0.189034	0.302563	0.0195009	0.0293076	0	0	none	N	none
ENSMUSG00000005262	Ufd1	924	93.4912	100.593	96.7173	113.871	119.587	124.621	57.537	63.7775	68.1155	46.1454	38.1687	36.231	53.0805	41.9912	43.9664	6.61373	6.91121	6.00323	5.36393	5.56517	13.1795	13.4474	12.8531	NA	NA	NA	NA	NA	NA	none	none	none
ENSMUSG00000005267	Zfp287	2280	7.28271	5.38277	5.51193	5.53774	7.18507	7.12242	8.39435	3.67053	4.19	3.46315	3.5297	3.71202	2.04872	2.32057	2.85544	2.81949	2.92886	2.68219	2.19165	1.76903	10.1718	10.2401	9.45595	2.10434	1.47162	0.69712	0.25025	0.220855	0.529465	none	none	none
ENSMUSG00000005268	Prlr	1827	0.345131	0.296357	1.14643	1.27978	3.16468	4.4442	1.74595	2.8629	1.84549	4.93924	4.66399	2.05884	0.798968	0.965316	0.855226	0.674437	1.98655	1.65601	2.28905	0.905482	NA	NA	NA	0.464668	0.111031	0.0710231	0	0.0165784	0.00377975	none	none	none
ENSMUSG00000005299	Letm1	2217	41.6198	42.0065	37.318	40.7094	42.452	34.9594	40.7664	29.255	23.3196	26.1521	24.8762	33.9333	18.6991	16.8192	16.7973	5.36859	5.33534	5.00512	4.87384	4.20465	13.2402	13.1395	13.0808	4.59813	5.09845	2.30313	2.40845	1.45204	1.21695	none	none	none
ENSMUSG00000005312	Ubqln1	1749	230.614	226.814	245.5	210.421	230.489	256.176	271.749	333.947	356	160.848	153.197	156.031	137.542	120.572	136.536	7.87842	7.86642	8.32897	7.30096	7.05039	14.2487	14.4343	14.6092	5.8953	5.96301	2.5911	2.76015	1.87483	1.79815	none	none	none
ENSMUSG00000005320	Fgfr4	2400	0	0	0	0	0	0	0	0	0	0.0939999	0	0	0	0	0	0	0	0	0.0445106	0	NA	NA	NA	0	0.0473057	0	0.0205019	0	0	none	none	none
ENSMUSG00000005338	Cadm3	1293	972.246	989.646	983.821	639.421	683.42	671.92	1238.44	899.934	1397.71	204.139	192.946	93.6741	48.0927	56.7028	43.1006	9.94091	9.37921	10.2042	7.3627	5.65245	15.5071	14.6024	14.3764	7.32733	6.37086	4.29026	2.60112	0.811016	0.193925	none	none	none
ENSMUSG00000005339	Fcer1a	753	0	0	0	0	0	0	0	0	0	0	0	0	0	0	0	0	0	0	0	0	NA	NA	NA	0	0	0	0	0	0	none	none	none
ENSMUSG00000005354	Txn2	501	189.628	180.121	176.286	168.011	169.904	203.321	207.988	206.715	190.683	229.652	263.155	311.582	139.27	119.185	124.231	7.51579	7.50313	7.66388	8.07216	7.00632	14.35	14.6738	14.7881	6.56712	6.8323	4.76388	4.19227	2.99033	2.2453	none	none	none
ENSMUSG00000005355	Casp14	774	0	0	0	0	0	0	0	0	0	0	0	0	0	0	0	0	0	0	0	0	NA	NA	NA	0	0	0	0	0	0	none	none	none
ENSMUSG00000005357	Slc1a6	1686	9.97317	11.5611	7.66091	13.036	9.52595	18.3879	793.364	781.784	661.278	7.76084	7.30027	4.3505	2.77051	4.78192	4.17037	3.42381	3.87282	9.54395	2.90121	2.29502	9.67987	9.75569	9.62289	4.66676	2.10434	1.56555	0.827942	0.120352	0	PV	none	none
ENSMUSG00000005360	Slc1a3	1632	42.7581	29.6378	31.8715	4.87116	6.29833	4.97522	76.8796	38.4596	38.5654	5925.58	6250.29	6059.79	133.628	103.897	115.368	5.16011	2.67391	5.70878	12.5697	6.89034	8.01529	8.22821	10.5927	7.61102	10.2677	4.21897	3.31095	4.27927	4.20326	GFAP	AS	Astro
ENSMUSG00000005362	Crbn	1338	111.69	123.558	114.276	127.917	130.359	156.676	89.7991	92.5177	88.6189	52.9434	44.0491	44.559	56.2939	49.7116	55.2752	6.87661	7.12223	6.51273	5.59048	5.77506	13.3778	13.5239	13.6638	4.48285	3.9024	3.63031	1.50005	4.07178	4.5734	none	none	none
ENSMUSG00000005364	Il5ra	1248	0	0	0	0	0	0	0	0	0	0	0	0	0	0	0	0	0	0	0	0	NA	NA	NA	0	0	0	0	0	0	none	none	none
ENSMUSG00000005370	Msh6	4077	10.1045	10.1374	10.1893	6.88199	10.3211	9.59566	5.99842	5.38831	7.85659	3.54142	4.00592	4.01338	9.38055	4.69659	5.23771	3.47816	3.31222	2.89034	2.27905	2.89497	11.7827	11.9188	12.2431	2.69153	2.68257	0.491068	0.279532	0.602675	1.23076	none	none	none
ENSMUSG00000005371	Fbxo11	2793	114.085	115.087	119.238	106.82	133.063	138.484	40.3538	56.5562	59.1529	37.0749	31.8647	29.3594	35.0164	31.0311	30.2094	6.87205	6.99008	5.72849	5.07751	5.04813	12.6342	12.4037	12.0802	4.97361	4.34577	0.671891	0.100333	0.602852	0.938793	none	none	none
ENSMUSG00000005373	Mlxipl	2595	0.080996	0	0.134524	0	0	0	0	0.268748	0	0.260809	1.45941	0.724761	24.4129	24.7578	26.2925	0.100089	0	0.123776	0.859963	4.70898	NA	NA	NA	0.238787	0.318076	0.313793	2.1477	2.82169	3.90432	Cx3cr1	none	none
ENSMUSG00000005374	Tbl2	1329	18.3457	18.7407	13.9215	15.834	14.0184	17.7732	28.0022	20.2031	15.2222	14.2591	13.3576	15.9914	12.0819	11.5642	14.5002	4.17014	4.07683	4.46875	3.95755	3.77773	9.46678	8.97934	9.24802	2.99639	2.97453	1.00063	1.11955	1.23845	0.95819	none	none	none
ENSMUSG00000005378	Bud23	846	30.0619	25.6002	18.9812	15.4772	22.4015	24.4302	16.3389	17.7236	19.9274	12.2666	12.0307	12.0048	25.5364	27.3985	24.9335	4.69383	4.44425	4.24767	3.71157	4.75254	11.3896	11.8604	11.4511	NA	NA	NA	NA	NA	NA	none	none	none
ENSMUSG00000005397	Nid1	3738	0.337375	0.627677	0.280168	0	0	0	0	0.746283	0	9.11331	11.7146	6.64151	0.624811	1.01102	0.836007	0.500877	0	0.320497	3.34433	0.867064	5.7154	3.66165	7.15322	1.02857	1.54597	0.0680735	0.0255318	0	0	GFAP	none	none
ENSMUSG00000005410	Mcm5	2205	8.10236	5.23846	4.43288	4.24155	3.35054	1.67379	6.75101	2.53025	2.54854	1.33007	1.39549	0.938245	11.1216	6.85571	5.43272	2.79172	2.03162	2.30547	1.15138	3.13805	10.2685	9.93163	8.54754	1.59455	1.8046	0.604994	0.525124	0.949283	0.353741	none	none	none
ENSMUSG00000005413	Hmox1	870	4.10706	4.56389	3.61127	5.91258	2.9537	10.1813	0	3.60725	1.29185	16.8551	17.4122	20.537	70.8045	39.3849	49.09	2.34882	2.87758	1.39672	4.26814	5.75737	9.28035	9.62586	8.35594	2.1177	3.54019	0.28476	2.70102	3.10094	2.06767	none	none	none
ENSMUSG00000005417	Mprip	6810	19.0432	14.7353	11.6363	22.2485	25.1406	22.0033	43.5619	38.0959	42.2496	9.77267	9.24545	11.5441	3.90115	8.28726	6.19492	4.01241	4.59281	5.40267	3.48381	2.83345	14.1769	14.2339	14.0872	4.37295	4.61157	3.70221	2.94922	0.490673	0.626348	none	none	none
ENSMUSG00000005442	Cic	7533	11.2165	10.5898	8.48046	9.37373	9.16782	6.17323	6.91636	5.4159	5.37111	3.71357	5.02742	4.519	7.441	8.56213	9.05736	3.47191	3.20762	2.78683	2.43829	3.22551	13.2388	12.9608	12.3247	4.76235	4.25147	2.90796	3.11871	3.15243	2.4271	none	none	none
ENSMUSG00000005447	Pafah1b3	699	18.643	27.6273	24.4712	10.704	9.1907	8.44798	56.2826	50.3845	36.1772	12.2644	11.5132	8.07191	28.8184	27.033	41.3537	4.61944	3.38509	5.60332	3.5381	5.06185	10.3879	10.2103	11.5938	3.62059	2.98307	5.22977	5.74439	5.8568	4.96338	none	none	none
ENSMUSG00000005465	Il27ra	1872	0	0.0964109	0	0	0	0.394307	0	0	0	0.120513	0.126441	0	0.311905	1.0767	0.278222	0.0456344	0.178154	0	0.114124	0.637479	NA	NA	NA	0.0285692	0.0285692	0	0.0740414	0.322824	0	none	none	none
ENSMUSG00000005469	Prkaca	1056	253.973	248.333	242.643	305.554	265.55	216.689	228.566	237.75	229.89	119.636	111.4	100.271	87.6381	92.8102	77.4344	7.96183	8.04219	7.86461	6.80007	6.44229	14.6455	14.8162	15.2669	6.59126	5.7643	3.91059	3.40711	2.26531	1.66866	none	none	none
ENSMUSG00000005470	Asf1b	609	0.345131	0.88907	0	0	0	0	0	0	3.69099	0	0.388666	0.617653	8.62885	4.13707	3.84852	0.497127	0	1.15726	0.417315	2.70888	NA	NA	NA	0.584963	0.610385	0	0.168357	0.258443	0.190101	Cx3cr1	none	none
ENSMUSG00000005474	Myl10	444	0	0	0	0	0	0	0	0	0	0	0	0	0	0	0	0	0	0	0	0	NA	NA	NA	0	0	0	0	0	0	none	none	none
ENSMUSG00000005481	Ddx39	1284	9.65802	9.55819	7.34066	6.19138	8.25552	6.32365	7.45293	11.1345	7.00253	4.04112	3.50253	4.10133	14.5517	7.84883	11.9662	3.30046	2.98614	3.25248	2.28737	3.63872	10.7293	10.8846	11.597	2.53605	2.83323	0.901762	1.35898	1.77125	2.04402	none	none	none
ENSMUSG00000005483	Dnajb1	1023	80.9509	81.8605	66.8831	63.9964	43.959	45.4574	55.0871	62.0367	47.7907	22.7143	12.0315	17.6493	62.7834	39.4053	37.4205	6.27733	5.70425	5.80662	4.20673	5.57096	12.7745	12.4264	12.6417	5.10601	4.71443	4.31767	3.90616	4.39823	4.28146	none	none	none
ENSMUSG00000005493	Msh4	2877	0	0	0	0	0	0	0	0	0	0	0	0	0	0.0875729	0	0	0	0	0	0.0415107	NA	NA	NA	0	0	0	0	0	0	none	none	none
ENSMUSG00000005501	Usp40	3708	0.453473	0.389388	0.470724	1.13503	0.433138	0.398135	0.286754	0.846361	1.51551	3.95469	3.38321	4.31133	4.0154	4.28066	3.79247	0.523925	0.727209	0.912938	2.28779	2.33042	7.70948	8.33783	8.48596	1.54597	2.05195	0.197972	0.233978	0.434173	0.628361	none	none	none
ENSMUSG00000005503	Evx1	1251	0	0	0	0	0	0	0	0.278738	0	0	0	0	0.233368	0	0	0	0	0.128178	0	0.108075	NA	NA	NA	0	0	0.338433	0.0666302	0	0	none	none	none
ENSMUSG00000005505	Kbtbd4	1605	26.5841	32.4979	26.3176	29.4272	35.0234	38.1718	15.2371	13.4701	11.204	10.4015	7.6687	12.4212	11.8232	8.79069	7.46364	4.88101	5.13781	3.83832	3.48075	3.37284	11.0867	11.3471	11.4492	3.854	3.8413	3.09347	2.60146	3.16998	2.49185	none	none	none
ENSMUSG00000005506	Celf1	1542	192.601	200.379	181.563	190.449	187.063	200.093	95.1578	111.711	107.143	61.3011	64.6236	55.9835	70.0511	63.2319	54.0423	7.58882	7.59645	6.72343	5.9457	5.98736	12.3081	12.3318	11.0628	4.97453	4.76907	1.97773	0.919413	1.13267	1.92783	none	none	none
ENSMUSG00000005510	Ndufs3	792	137.735	117.586	117.245	88.5665	99.3657	112.772	187.954	119.756	83.0157	78.3332	67.8413	102.112	43.8651	43.5818	44.0603	6.96796	6.66156	7.03609	6.38822	5.48658	14.1114	14.5147	14.7789	4.75382	5.11742	1.86183	0.962235	1.5542	1.01682	none	none	none
ENSMUSG00000005514	Por	2037	50.3535	50.3256	45.9283	72.7732	68.1222	75.7347	47.5007	34.9214	28.4149	74.3139	79.4801	95.6535	30.0972	36.1162	32.7278	5.64008	6.19397	5.24586	6.39488	5.08663	13.1949	12.8703	11.9425	4.82171	6.02724	2.13486	1.92758	2.11293	1.24143	none	none	none
ENSMUSG00000005533	Igf1r	4110	17.7455	15.7207	15.5434	13.5397	10.0038	8.97983	17.0746	19.0895	14.7666	16.4671	18.2562	19.7685	10.8679	12.3828	12.799	4.11574	3.56573	4.16807	4.26032	3.70228	11.0355	10.0374	10.3517	2.80323	2.75702	0.435558	0.115734	0.306488	0.316864	none	none	none
ENSMUSG00000005534	Insr	4119	19.2376	14.8977	14.2382	18.2784	17.1564	21.1461	12.1326	18.7938	16.6444	17.6361	18.9634	17.3053	9.56841	9.54207	8.15579	4.09799	4.31181	4.07527	4.24552	3.33468	9.77139	9.32249	9.71668	2.76129	2.85333	0.0863909	0.0355883	0.233289	0.264994	none	none	none
ENSMUSG00000005540	Fcer2a	996	0	0	0	0	0	0	2.13511	0.350101	1.69263	0	0	0	0	0	0	0	0	1.25859	0	0	NA	NA	NA	0.286881	0.0749621	0.0528284	0.047089	0	0	none	none	none
ENSMUSG00000005547	Cyp2a5	1485	0.141538	0	0	0	0	0	0	0	0	0	0	0	0	0	0	0.0665087	0	0	0	0	NA	NA	NA	0.0565835	0	0.745202	0.0418679	0	0.0924505	none	none	none
ENSMUSG00000005553	Atp4a	3105	0	0.058126	0.224856	0.150606	0	0	0	0	0.180983	0.0726569	0.152462	0	0	0	0	0.130044	0.0706668	0.0845102	0.10439	0	NA	NA	NA	0.0840643	0.0931094	0.100389	0.0247858	0	0	none	none	none
ENSMUSG00000005566	Trim28	2505	69.8937	69.0944	60.3415	69.818	68.731	64.2375	75.5548	62.3624	43.7448	29.0893	30.9927	29.2061	58.8547	55.4184	53.0189	6.0756	6.10004	5.94378	4.94311	5.8269	14.7051	14.9595	14.1903	5.0798	5.21981	3.60847	4.14023	4.63412	3.91224	none	none	none
ENSMUSG00000005575	Ube2m	552	371.25	399.544	423.081	366.819	360.785	331.629	408.363	453.564	416.374	199.443	209.254	172.743	158.136	125.517	133.982	8.64009	8.46792	8.73843	7.60595	7.13146	14.4635	14.5557	15.1454	6.75916	5.99518	7.0107	6.65152	5.27121	4.59616	none	none	none
ENSMUSG00000005580	Adcy9	4062	30.943	30.9688	25.0945	68.153	56.8571	54.8791	17.7999	17.0831	20.0599	5.77606	5.41922	5.41724	4.95915	5.27216	6.66748	4.90699	5.92986	4.2716	2.70874	2.72965	11.2394	11.4632	10.3666	3.9486	3.12433	0.922852	0.537498	0.55365	0.524877	none	none	none
ENSMUSG00000005583	Mef2c	1455	876.708	872.884	953.937	142.378	164.471	148.136	103.771	122.704	103.121	51.7871	46.2007	31.0228	289.134	295.584	313.573	9.81727	7.25419	6.79267	5.45955	8.23089	15.4443	13.3839	14.8653	6.15218	4.72101	1.71427	0.906208	1.79266	1.9201	none	none	none
ENSMUSG00000005609	Ctr9	3522	22.5581	26.0319	23.8871	30.2725	35.8426	33.5329	12.3778	13.3659	10.8497	6.98193	6.31731	5.87402	20.6399	16.7393	13.8268	4.65301	5.0966	3.72223	2.88579	4.17542	12.4185	12.4891	12.7855	3.81967	3.49313	1.93855	1.53795	0.986008	1.19935	none	none	none
ENSMUSG00000005610	Eif4g2	2721	146.612	168.542	184.744	138.347	141.778	151.915	159.825	166.469	196.198	238.036	231.565	195.748	235.292	211.206	199.643	7.38916	7.18004	7.45256	7.7995	7.75743	16.2507	16.3133	16.4818	6.33235	6.40667	4.24092	3.21554	4.37491	4.34807	none	none	none
ENSMUSG00000005611	Mrvi1	2766	0.151977	0	0	0	0	0	0.768825	1.00853	1.42215	0.0815617	0.256722	0.203986	0.527735	0.182175	0.282447	0.0712946	0	1.04719	0.239712	0.412278	2.75587	2.53958	10.2721	0.731183	0.0658021	0.0351105	0.0343651	0	0	none	none	none
ENSMUSG00000005615	Pcyt1a	1104	17.8962	13.5688	17.075	14.8253	9.31058	16.7152	24.078	35.6913	29.5229	45.9782	40.3072	49.7446	27.7663	24.8752	27.3626	4.10266	3.86958	4.94317	5.53429	4.79015	10.3013	9.9081	12.0005	3.51349	4.3799	0.73238	0.449897	0.417301	0.766444	none	none	none
ENSMUSG00000005621	Zfp592	3789	4.27137	4.38223	4.14595	4.19621	5.17132	3.89624	7.85747	6.99426	8.30545	7.0258	8.05858	7.49522	10.71	9.64169	10.0345	2.39685	2.43863	3.12417	3.09196	3.47622	9.80602	9.69837	9.51303	2.63691	2.41143	0.473892	1.49258	1.18104	1.38005	none	none	none
ENSMUSG00000005625	Psmd4	1140	131.273	125.862	140.248	130.034	116.652	118.491	171.618	155.386	139.009	74.4083	79.7296	73.5804	101.156	89.2866	90.9173	7.06027	6.93929	7.28852	6.26503	6.56661	14.125	14.2566	14.3663	5.8268	6.3067	4.48289	4.8272	4.29375	3.80105	none	none	none
ENSMUSG00000005628	Tmod4	1038	0	0	0	0	0.309456	0	0	0.335935	0	0.217341	0.456064	0	0	0	0.250883	0	0.141631	0.153129	0.292155	0.115869	NA	NA	NA	0.137504	0.146221	0	0	0	0.0813549	none	none	none
ENSMUSG00000005640	Insrr	3903	0	0	0	0	0	0	0	0	0	0	0	0	0	0	0.0667221	0	0	0	0	0.0317349	NA	NA	NA	0.0565835	0.0749621	0.0222332	0.0325552	0	0	none	none	none
ENSMUSG00000005649	Cabp5	537	0.391405	0.336092	0	0	0	0	0	0	2.09293	0	0	0	0.543655	0	0	0.313245	0	0.763535	0	0.240276	NA	NA	NA	0.0840643	0.00958605	0	0	0	0	none	none	none
ENSMUSG00000005656	Snx6	1221	38.2154	43.3096	43.4574	36.0011	37.6198	44.1313	54.8623	61.6866	65.8143	66.7006	54.8611	63.1539	177.174	126.902	128.822	5.41484	5.33094	5.94925	5.96744	7.18288	12.2856	12.0779	12.8065	4.28392	5.0027	1.06189	1.44504	2.03861	2.12988	none	none	none
ENSMUSG00000005667	Mthfd2	1053	3.39329	2.22816	3.97822	3.10866	3.96562	2.10297	35.3418	14.5706	17.0774	1.07122	1.3487	1.78609	29.6656	18.1842	24.4836	2.07035	2.02115	4.54411	1.26424	4.65026	8.77301	9.42329	9.80114	2.24489	2.15489	1.73168	2.17323	1.91363	1.90699	none	none	none
ENSMUSG00000005672	Kit	2940	13.5834	10.7429	14.961	111.659	121.057	132.815	196.382	207.797	259.378	10.973	9.74163	4.15813	4.46851	5.91305	4.78316	3.81719	6.94068	7.79562	3.21582	2.5981	10.383	12.5269	10.5771	4.15704	4.05021	0.341866	0.108123	0.0468531	0.00735359	none	none	Int_Npy
ENSMUSG00000005674	Tomm40l	927	20.4063	17.7171	27.8669	27.2406	15.9395	9.55524	28.6754	24.8266	17.58	19.7126	20.427	24.7521	8.18826	7.61006	8.42771	4.52336	4.21556	4.62609	4.5002	3.18195	10.0947	10.5714	10.5956	4.50589	4.22136	4.38258	3.25647	2.37692	1.41883	none	none	none
ENSMUSG00000005677	Nr1i3	1077	0	0	0	0	0	0	0	0	0	0	0	0	0	0	0	0	0	0	0	0	NA	NA	NA	1.22651	1.0048	0	0.0436599	0	0	none	none	none
ENSMUSG00000005681	Apoa2	309	0.680209	2.92041	1.12974	1.51337	0	0	6.8821	13.5418	7.27447	0.730096	1.53202	2.43463	0.944799	0	0	1.36557	0.589242	3.35513	1.35929	0.394989	5.89669	5.38071	7.9541	2.85997	2.32	3.14247	1.52465	0.477491	0.269305	none	none	none
ENSMUSG00000005682	Pan2	3603	2.85846	2.05377	2.61599	2.33621	3.03117	1.63895	3.24622	3.67766	2.49549	1.3149	2.10222	1.87919	2.917	2.51738	2.96338	1.81123	1.73788	2.04956	1.46751	1.92572	10.4613	10.4029	10.7314	1.99277	1.62293	0.53112	0.515441	0.50393	0.62691	none	none	none
ENSMUSG00000005683	Cs	1395	196.926	195.489	210.454	222.25	241.084	225.411	240.859	279.46	208.265	364.194	361.579	424.012	96.0586	93.9159	97.4461	7.6579	7.84913	7.92992	8.58595	6.59704	14.6581	14.7217	15.3942	6.75168	7.85943	5.71969	5.28606	4.85763	4.53641	none	none	none
ENSMUSG00000005686	Ampd3	2328	3.52113	2.86847	3.59886	1.80785	1.93171	1.90243	4.56737	6.14121	3.62083	16.1835	12.3026	15.5922	10.0324	8.00864	7.15921	2.1142	1.5264	2.53019	3.97203	3.23267	9.56349	9.34716	11.5538	2.64616	3.52105	0.648054	0.519188	0.671562	0.723802	none	none	none
ENSMUSG00000005687	Bcas2	678	103.852	109.673	123.571	123.46	126.496	136.088	266.605	274.64	314.13	138.088	113.461	115.397	131.331	127.088	159.399	6.82484	7.01883	8.1605	6.94621	7.13209	13.2425	13.427	13.3999	4.9782	4.85864	3.51111	4.17114	2.97652	3.04639	none	none	none
ENSMUSG00000005696	Sh2d1a	381	0	0	0	0	0	0	0	0	0	0	0	0	0	0	0	0	0	0	0	0	NA	NA	NA	0.0565835	0	0	0	0	0	none	none	none
ENSMUSG00000005698	Ctcf	2211	37.8351	41.9572	46.1031	56.048	46.3444	62.0961	42.3198	48.7329	66.0822	41.5283	37.8973	29.6021	67.7371	61.7619	58.3021	5.42509	5.80296	5.73818	5.22275	5.99096	13.2116	13.4926	12.4757	4.34483	4.16618	0.774463	0.701556	1.2927	1.58745	none	none	none
ENSMUSG00000005699	Pard6a	1041	14.1335	10.229	8.04816	8.98427	7.09697	3.54535	23.4924	15.7435	21.5928	3.68414	5.22962	5.78138	2.24356	4.11441	2.25144	3.56115	2.91498	4.41117	2.56032	1.95226	12.1709	12.1575	13.1422	4.69377	4.24082	5.63782	4.25204	3.4926	2.34248	none	none	none
ENSMUSG00000005705	Agrp	396	0	0	0	2.36177	0	0	0	0	0	0.569696	0	0	0	0	0	0	0.837748	0	0.250839	0	NA	NA	NA	0.333424	0.189034	0.0313746	0	0	0	none	none	none
ENSMUSG00000005716	Pvalb	333	15.1484	18.9695	18.8697	5.61719	0.964609	46.5495	7219.48	6415.88	6083.6	49.4558	52.5994	35.0171	56.9858	34.8035	43.0117	4.22207	4.22577	12.6826	5.54506	5.52148	8.63656	7.5352	17.8283	7.73457	6.51644	4.48783	2.92996	1.02426	0.210946	PV	none	Int_Pv
ENSMUSG00000005718	Tfap4	1017	1.65337	2.30704	1.37301	1.37944	1.57923	4.35482	1.04551	5.14308	1.65768	2.44011	2.09467	2.21918	8.89895	8.91849	8.96221	1.47395	1.7815	1.85416	1.70103	3.31129	6.33454	7.50857	7.39843	1.33342	1.01436	0.519523	0.928655	0.893956	0.367675	Cx3cr1	none	none
ENSMUSG00000005732	Ranbp1	612	215.68	208.202	216.184	204.016	187.375	202.627	154.628	186.316	224.965	206.062	175.976	164.105	194.152	158.496	156.59	7.74386	7.63667	7.56709	7.51608	7.41571	13.4486	13.5613	13.7716	5.13175	5.26379	1.39949	2.47963	1.96435	1.66689	none	none	none
ENSMUSG00000005763	Cd247	621	0	0	0	0	0	0	0	0	0	0	0	0	0	0	0	0	0	0	0	0	NA	NA	NA	1.54597	1.09761	0.0080928	0.00422992	0	0	none	none	none
ENSMUSG00000005774	Rfx5	1977	3.93365	4.10807	3.88465	6.85953	5.84913	4.48038	9.68089	7.23153	10.5171	9.01486	8.14134	8.0862	7.67882	10.3226	10.6696	2.31483	2.75054	3.34244	3.23483	3.40013	9.01735	9.30064	9.50279	2.48543	2.32385	0.730365	1.13729	1.32782	1.88483	none	none	none
ENSMUSG00000005779	Psmb4	795	306.949	287.408	275.758	293.519	297.376	271.116	284.88	213.168	142.785	139.333	142.614	172.698	165.985	148.633	148.388	8.18507	8.17161	7.74558	7.25312	7.27924	14.4914	14.7929	14.4755	6.82146	7.31542	7.26499	6.68034	6.87922	5.26276	none	none	none
ENSMUSG00000005800	Mmp8	1398	0	0	0	0	0	0	0	0	0	0	0.169311	0	0	0	0	0	0	0	0.0792069	0	NA	NA	NA	0	0	0	0	0	0	none	none	none
ENSMUSG00000005802	Slc30a4	1293	40.4764	40.2	36.4478	34.7197	26.3332	37.6778	25.4925	26.429	42.1573	17.9712	17.9399	16.0002	9.70885	10.5222	10.2716	5.32342	5.08365	5.01612	4.19407	3.48124	10.5473	9.76721	9.54085	3.81352	2.9573	0.791806	0.16869	0.645628	1.00684	none	none	none
ENSMUSG00000005803	Sqor	1353	0.310694	0.533573	0	0	0	0	1.57174	0	0.830677	20.3423	22.3927	25.2991	106.808	112.101	124.145	0.357746	0	0.848643	4.56548	6.84989	NA	NA	NA	NA	NA	NA	NA	NA	NA	Cx3cr1	none	none
ENSMUSG00000005804	Bloc1s6	519	53.0524	55.9874	70.6249	41.4471	37.7536	39.8227	38.9256	40.3122	53.0553	48.2496	54.2717	43.4857	29.2505	40.2922	23.583	5.92809	5.34605	5.49498	5.63427	5.00189	13.3669	12.9163	12.6872	3.24489	2.73118	1.65259	1.40983	1.60177	1.84888	none	none	none
ENSMUSG00000005813	Metap1	1161	61.0097	60.6268	60.1359	59.2091	61.4209	61.6708	43.9601	53.7618	41.6261	24.8723	22.4261	20.5733	43.2508	29.7302	35.8885	5.94464	5.94876	5.56832	4.56218	5.22071	12.1293	12.3338	11.3903	4.02857	3.55172	1.62344	1.40905	1.73288	1.94365	none	none	none
ENSMUSG00000005823	Gpr108	1710	9.09571	8.54911	8.57412	7.65712	5.63535	4.74828	18.6541	18.3527	21.3608	18.734	21.3166	28.3763	32.7795	33.151	31.8287	3.28387	2.81015	4.35444	4.57343	5.0698	10.2017	10.0224	11.1357	3.34767	4.10825	2.05134	2.77898	3.5369	3.30373	none	none	none
ENSMUSG00000005824	Tnfsf14	720	0	0	0	0	0	0	0	0	0	0	0	0	0.405476	0.699854	0.723378	0	0	0	0	0.686675	NA	NA	NA	0	0	0	0.1387	0.456114	0	none	none	none
ENSMUSG00000005836	Gata6	1770	0	0	0	0	0	0	0	0	0	0	0	0	0	0	0	0	0	0	0	0	NA	NA	NA	0	0	0	0	0	0	none	none	none
ENSMUSG00000005846	Rsl1d1	1359	92.6421	109.431	116.62	103.23	120.781	129.27	45.3793	86.213	109.992	72.7098	56.0828	51.7588	66.5948	56.3591	53.4629	6.74458	6.89191	6.34923	5.93508	5.90221	12.7008	12.8921	12.7815	4.42089	4.54473	2.15965	1.92914	2.64806	3.10791	none	none	none
ENSMUSG00000005864	Cnga2	1995	0	0	0	0	0	0	0	0	0	0	0	0	0.146337	0	0	0	0	0	0	0.0687108	NA	NA	NA	0.0565835	0	0.0611181	0.0348011	0	0.0324633	none	none	none
ENSMUSG00000005871	Apc	8529	38.5425	39.6767	40.6841	31.0328	35.0629	30.5504	18.9494	23.6719	22.7311	33.3281	29.9167	26.1969	16.3617	19.0534	16.61	5.34463	5.05378	4.50996	4.94551	4.19705	10.757	10.0112	10.8999	4.21723	3.74846	1.16651	0.441107	0.384944	0.897085	none	none	none
ENSMUSG00000005873	Reep5	570	492.643	519.913	541.394	443.019	500.419	394.971	386.14	469.217	537.306	928.916	965.891	862.837	548.033	468.092	478.344	9.01954	8.80457	8.86177	9.84583	8.96335	16.1551	15.7418	16.3873	7.27891	7.12502	3.38795	3.65537	3.4063	3.11605	none	none	none
ENSMUSG00000005881	Ergic3	1185	78.7527	84.9861	68.934	72.6111	77.2542	67.8966	97.8042	85.336	112.865	136.502	159.196	149.508	244.641	241.742	251.186	6.29568	6.20138	6.63906	7.22306	7.94753	13.0506	12.8949	13.3413	6.15381	6.87889	3.86329	4.1028	4.84236	3.60663	none	none	none
ENSMUSG00000005882	Uqcc1	888	42.3683	30.8932	27.9114	48.9749	33.279	29.0934	58.6722	67.5411	58.8532	34.0432	34.1185	39.8178	18.4108	22.9817	24.634	5.11787	5.25232	5.97014	5.20919	4.52412	11.4959	12.0618	13.1852	4.4957	4.43474	2.07707	1.63368	1.32763	0.983199	none	none	none
ENSMUSG00000005883	Spo11	1191	0	0	0	0	0	0	0	0	0	0	0	0	0	0	0	0	0	0	0	0	NA	NA	NA	0	0	0	0	0	0	none	none	none
ENSMUSG00000005886	Ncoa2	4389	34.1927	34.0484	35.1555	28.6609	26.8594	27.7497	32.7053	37.5793	34.3138	18.2474	16.88	17.0978	19.556	19.173	19.9955	5.14835	4.84582	5.16455	4.20229	4.36281	10.6845	10.7558	10.2221	3.87578	3.34388	0.145825	0.0701396	0.160149	0.259018	none	none	none
ENSMUSG00000005891	Prl4a1	684	0	0	0	0	0	0	0	0	0	0	0	0	0	0	0	0	0	0	0	0	NA	NA	NA	0	0	0	0	0	0	none	none	none
ENSMUSG00000005892	Trh	771	1.63568	4.21357	3.16942	0	1.66648	0	4.13729	4.52271	4.37317	18.7268	17.499	4.39087	0.75731	0.65356	0.675529	2.00224	0.637374	2.41803	3.86185	0.761682	NA	NA	NA	3.46728	0.858644	1.88594	0.526477	0.742232	0.402433	GFAP	none	none
ENSMUSG00000005893	Nr2c2	1890	58.8295	58.728	60.7673	54.1858	55.2354	53.5055	59.0714	38.3755	50.8433	40.1066	37.0701	33.3361	22.0888	21.5955	24.2504	5.91747	5.78944	5.65621	5.24175	4.56346	12.7774	12.9388	12.3923	4.11437	3.36923	1.04363	0.451417	0.482446	1.0973	none	none	none
ENSMUSG00000005897	Nr2c1	1773	8.41687	8.14354	8.66324	10.5501	7.79032	8.7428	8.39593	13.5704	21.2357	5.98036	7.60956	5.94034	15.1488	9.52085	13.8066	3.23387	3.32592	3.94492	2.90883	3.78925	9.81002	9.97254	9.78174	2.0072	1.60407	0.102123	0.0598901	0.292173	0.440541	none	none	none
ENSMUSG00000005899	Smpd4	2472	11.9887	11.5356	13.1332	6.05348	7.92642	4.77762	9.03276	5.36029	5.0012	10.5864	12.0647	14.4556	7.55839	7.74595	8.6384	3.72456	2.85848	2.90009	3.74081	3.16686	10.5165	10.2916	10.7211	2.65535	2.90945	0.627139	0.549324	0.813357	0.909484	none	none	none
ENSMUSG00000005907	Pex1	3855	4.79799	5.75854	4.52774	4.8522	5.1661	6.31872	1.65492	2.08045	1.16618	1.17043	1.2894	1.46362	2.1962	2.6796	1.08085	2.5917	2.68833	1.39717	1.20653	1.578	11.7413	11.7086	11.3935	2.41684	1.7852	0.286237	0.200925	0.0916603	0.450187	none	none	none
ENSMUSG00000005917	Otx1	1068	5.11685	2.19687	2.94176	0	0.300763	0	0	1.63249	0	7.60448	7.53531	6.51572	0.273355	0.471812	0.243835	2.14355	0.137837	0.626827	3.03888	0.411065	9.14923	4.81157	6.76685	1.50589	2.35238	0.733431	0.177698	0	0	none	AS	none
ENSMUSG00000005936	Kctd20	1260	39.5347	49.5607	55.411	31.9177	34.6708	35.7354	20.253	32.3793	22.7457	21.8438	19.1612	21.6436	42.8646	33.593	30.3819	5.61967	5.13373	4.70742	4.45173	5.19429	12.3235	12.2797	12.0609	4.29131	3.77681	0.711328	0.476526	0.521143	0.508999	none	none	none
ENSMUSG00000005947	Itgae	3504	0.0599842	0	0	0	0	0	0.303449	0.39806	0.320749	0.386301	0.405304	0.0536745	1.08312	0.934736	1.04048	0.0285617	0	0.423043	0.358126	1.01396	NA	NA	NA	0.0840643	0.0285692	0.0323741	0.0406492	0.0435439	0.130642	Cx3cr1	none	none
ENSMUSG00000005949	Ctns	1104	6.85385	9.64528	4.42685	6.35368	9.60153	6.68607	1.92624	6.00119	5.59917	32.2869	39.0208	38.501	66.3747	64.3561	55.4328	2.99554	3.09543	2.46176	5.23277	5.97853	9.04579	8.68284	8.54414	2.45418	3.07838	0.771454	1.95027	2.38173	1.88344	none	none	none
ENSMUSG00000005950	P2rx5	1368	0	0.263861	0.255182	1.02551	0.234806	0	3.88627	3.05878	4.92941	0	0	0.412446	0	0.184172	0	0.230221	0.505997	2.3098	0.185844	0.0859558	NA	NA	NA	0.62293	0.137504	0.172135	0.0282073	0.0710909	0	PV	none	none
ENSMUSG00000005951	Shpk	1431	1.4688	1.38735	1.21974	1.30714	2.24469	1.54747	2.97214	0.487352	0.785399	2.04947	3.96977	2.49716	1.02007	0.704255	1.63784	1.23795	1.43283	1.272	1.94066	1.08455	7.3939	7.75254	7.76528	1.17632	1.71955	0.260906	0.446612	0.30351	0.193473	none	none	none
ENSMUSG00000005952	Trpv1	2520	0	0	0	0	0	0	0	0.138373	0	0	0	0	0	0	0	0	0	0.0650545	0	0	NA	NA	NA	0	0	0	0	0	0	none	none	none
ENSMUSG00000005958	Ephb3	2982	10.9956	9.62324	8.42871	11.9182	10.7718	8.41611	1.42627	1.63709	0.753793	10.3646	12.2238	12.1726	2.15384	2.70366	2.53255	3.41718	3.50699	1.18421	3.65386	1.79217	11.6164	10.872	9.60932	2.848	3.46554	1.77394	0.75227	1.42853	0.94893	none	none	none
ENSMUSG00000005968	Tuft1	1173	1.61267	0.923178	0.892811	4.38529	2.19072	1.88783	10.8776	15.4582	9.10239	0.192327	1.00894	0.481011	3.73328	2.79226	3.33013	1.09956	1.93406	3.6795	0.642248	2.09937	6.05241	8.38639	9.50943	1.20163	0.725378	0.030737	0.119413	0.0903835	0.0468909	none	none	none
ENSMUSG00000005973	Rcn1	978	17.4079	16.2396	20.7026	24.3857	15.4367	5.28322	6.52322	4.99163	10.3427	51.9018	57.6012	41.5381	23.2838	17.7754	13.58	4.25676	4.00317	3.05065	5.68221	4.26402	9.8086	9.56734	9.95012	3.09424	3.48027	1.27788	0.954194	0.868629	1.21694	none	none	none
ENSMUSG00000005980	Dnase1	855	0	0	0	0	0	0	0	0	0	0	0	0	0	0	0	0	0	0	0	0	NA	NA	NA	1.79077	2.0024	0.154619	0	0	0	none	none	none
ENSMUSG00000005981	Trap1	2121	46.6747	45.7798	48.7177	51.5915	52.4	57.4226	54.1418	57.5414	35.238	44.9923	39.2822	57.3714	37.4392	28.0337	32.0456	5.58669	5.77623	5.6431	5.59142	5.06635	11.9531	12.1191	12.9335	4.79909	5.60328	1.73239	1.13864	1.25731	1.20816	none	none	none
ENSMUSG00000005982	Naa60	729	42.6712	41.3448	36.3934	26.3002	27.7593	25.3135	32.0881	53.5727	40.0844	23.5193	29.5466	25.0251	25.6301	20.7364	22.8623	5.36235	4.77914	5.42341	4.75651	4.58954	13.1354	12.731	13.4862	5.66164	5.15354	3.53481	3.66144	3.05308	2.62664	none	none	none
ENSMUSG00000005983	1700037C18Rik	528	11.1462	15.3819	14.5454	3.54266	4.86689	6.98998	8.05519	7.92502	13.836	7.26363	8.51752	4.98685	7.18799	4.29456	7.39819	3.87688	2.61663	3.45137	2.98599	2.86663	10.1198	9.7609	9.97307	2.0072	2.01911	2.61071	2.57627	2.40639	1.78968	none	none	none
ENSMUSG00000005986	Ankrd13d	1818	20.6947	16.281	15.5535	15.4334	10.4245	13.8046	12.2822	12.4673	9.27315	4.34323	5.20786	2.5863	2.40877	3.04887	3.43784	4.21021	3.82993	3.62537	2.33508	1.98738	11.816	11.755	12.0092	4.12598	3.35896	3.63082	2.13723	1.20947	1.62296	none	none	none
ENSMUSG00000005994	Tyrp1	1614	0.130226	0	0	0	0.398036	0	0	0	0	0	1.46653	0	0	0	0	0.0613043	0.179739	0	0.574191	0	NA	NA	NA	0.189034	0.0749621	0	0	0	0	none	none	none
ENSMUSG00000006005	Tpr	7296	34.7427	39.6534	36.507	40.187	45.3029	54.531	30.0215	41.6758	53.2992	31.0756	28.2895	21.0348	58.0605	49.4502	50.3272	5.2467	5.57512	5.415	4.79701	5.7445	11.2268	11.1659	11.4118	3.72028	3.58256	0.904756	0.635954	0.751637	1.34944	none	none	none
ENSMUSG00000006007	Pdc	735	0	0	0	0	0	0	0	0	0	0	0	0	0	0	0	0	0	0	0	0	NA	NA	NA	0	0	0	0	0	0	none	none	none
ENSMUSG00000006010	Odr4	1344	25.8039	27.2602	31.4284	34.0981	38.4789	37.8957	41.139	54.7439	67.3173	44.8178	44.0285	48.1384	37.1445	32.8056	36.8148	4.86612	5.24124	5.79182	5.54416	5.19331	11.3799	11.7109	12.5678	NA	NA	NA	NA	NA	NA	none	none	none
ENSMUSG00000006014	Prg4	3666	0.229334	0.147693	0.28567	0	0	0	0	0.951175	0.459863	0.430769	0.58109	0.256513	0.238906	0.274902	0.284142	0.287944	0	0.556156	0.508723	0.340258	NA	NA	NA	1.47508	1.69599	0.280587	0	0	0.0240525	none	none	none
ENSMUSG00000006019	Dhx34	3438	1.77294	1.78486	1.92923	1.90426	1.30803	0.644103	0.927822	0.507127	1.30763	2.0342	1.65234	2.1882	4.84024	4.7634	5.2265	1.5003	1.19249	0.936736	1.56474	2.57128	10.4346	10.5988	9.97623	1.70487	2.10434	1.01101	1.62502	1.81119	1.40002	none	none	none
ENSMUSG00000006021	Kptn	1293	13.167	11.8646	12.1493	11.9349	12.9182	12.5593	4.93404	4.8543	3.47689	10.1197	10.4345	10.7638	3.83838	4.87137	3.82669	3.74347	3.75176	2.43876	3.51593	2.37262	11.3184	11.4083	10.7632	3.28096	3.98732	2.93659	2.18363	1.87315	1.74096	none	none	none
ENSMUSG00000006024	Napa	888	458.95	442.667	449.727	454.466	395.008	407.308	481.352	359.303	339.83	134.394	113.284	124.96	166.355	133.351	153.962	8.81842	8.714	8.62386	6.96824	7.25004	15.0499	15.0765	15.0237	6.68004	6.23471	4.37304	4.48341	3.57093	3.18449	none	none	none
ENSMUSG00000006050	Sra1	699	76.9775	90.1115	70.9165	89.646	76.7423	64.4158	126.256	77.8216	78.7859	35.5021	40.6347	32.5567	68.4959	61.9956	60.354	6.32796	6.28419	6.57422	5.21844	6.0138	12.8192	13.0948	12.6864	4.65535	4.69859	3.14083	2.99647	3.27357	3.48747	none	none	none
ENSMUSG00000006056	Calcoco2	996	0	0	0	0	0	0	0	0	0	0	0	0.188831	0	0	0	0	0	0	0.088065	0	NA	NA	NA	0	0.0473057	0	0	0	0	none	none	none
ENSMUSG00000006057	Atp5g1	411	4.60258	7.02603	9.34301	4.55115	7.81545	10.7758	10.3483	22.0589	47.8549	6.58685	6.33497	6.86407	2.13097	1.83903	1.90085	2.99829	3.12336	4.79462	2.92511	1.56411	14.1055	14.1728	15.3049	1.9855	1.48543	4.66489	4.25484	3.19466	2.67281	none	none	none
ENSMUSG00000006058	Snf8	777	32.1904	32.7514	43.58	40.3234	49.6085	38.9496	35.5797	34.5559	35.4385	20.905	24.675	26.8679	45.0877	35.344	40.5539	5.21622	5.45814	5.17757	4.65245	5.36907	12.7051	13.0413	12.8068	5.02591	4.46684	6.45485	6.57285	4.91186	4.7922	none	none	none
ENSMUSG00000006095	Tbcb	735	115.244	125.477	120.163	121.52	112.316	86.3676	115.732	129.517	113.92	86.8635	89.2043	91.3509	116.777	86.7247	83.6166	6.92237	6.75134	6.91556	6.49409	6.59554	12.9504	13.0723	13.2595	5.78031	5.97636	4.92833	5.04029	4.37073	3.75529	none	none	none
ENSMUSG00000006127	Inpp5k	1407	31.6696	30.2726	29.773	35.8949	34.473	32.5265	54.4112	37.9184	23.9639	27.8993	25.7389	33.5515	46.686	39.5738	52.9346	4.98056	5.14152	5.31341	4.90993	5.56676	11.6295	11.9124	11.7027	3.82579	4.10545	2.19754	2.65672	2.32523	2.40449	none	none	none
ENSMUSG00000006134	Crkl	912	34.8003	39.5792	29.4735	33.8417	38.743	45.3245	89.7729	121.969	73.9412	57.8841	53.9836	65.3727	72.0254	64.6444	49.3991	5.15452	5.33282	6.58838	5.90882	5.97781	13.4591	13.5085	14.1736	4.17951	4.43073	1.36935	1.01449	1.37713	1.50514	none	none	none
ENSMUSG00000006143	Upk3bl	945	0	0	0	0	0	0	0	0	0	1.19365	0.500947	0.796087	0	0	0	0	0	0	0.872023	0	NA	NA	NA	0.137504	0.499102	0.0589265	0.085785	0	0	none	none	none
ENSMUSG00000006154	Eps8l1	2334	0.450267	0.077327	0.747834	1.20214	1.10099	0	0	0.896403	0	0	0.811302	2.41742	2.75182	3.2384	2.2315	0.511106	0.821882	0.37718	1.05397	1.90326	8.60829	8.84698	9.50046	1.05658	0.936088	0.513359	1.03773	1.19347	1.94097	none	none	none
ENSMUSG00000006169	Clint1	1926	38.7412	36.0775	43.5002	38.1195	44.363	41.7744	41.9572	35.6667	25.6759	16.9844	16.2222	16.9912	97.4659	78.6191	83.5604	5.3377	5.40664	5.14703	4.14833	6.45201	13.2046	13.0295	12.8702	4.14241	3.75132	1.00937	2.02834	1.98215	1.9269	none	none	none
ENSMUSG00000006179	Prss16	1530	0.412127	0.825731	0.912651	0	0.209944	0	0	0.227909	0.367289	0.147451	0.154704	0	0	0.164671	0	0.779752	0.0975858	0.261109	0.138445	0.0770932	NA	NA	NA	0.333424	0.0931094	0	0.0563998	0	0	none	none	none
ENSMUSG00000006191	Cdkal1	1737	10.1644	15.2739	14.0681	17.2299	20.1568	22.0975	9.79422	12.2457	12.2937	10.0007	12.1278	12.2352	15.4627	14.3597	13.9428	3.82464	4.38046	3.63744	3.6386	3.9624	9.96096	10.4872	10.103	2.01436	2.25902	0.0227474	0.00475726	0.0286091	0.0397071	none	none	none
ENSMUSG00000006200	Rhox6	684	0	0	0	0	0	0	0	0	0	0	0	0	0	0	0	0	0	0	0	0	NA	NA	NA	0	0	0	0	0	0	none	none	none
ENSMUSG00000006204	Cdcp3	8091	0	0	0	0	0	0	0	0	0	0.0557656	0.146272	0.18596	0	0	0	0	0	0	0.17547	0	NA	NA	NA	NA	NA	NA	NA	NA	NA	none	none	none
ENSMUSG00000006205	Htra1	1443	29.1316	23.1386	28.5464	17.8238	27.1575	31.715	341.902	449.71	464.984	2011.17	2063.68	2104.15	19.4224	21.1266	16.2422	4.8042	4.73148	8.71378	11.0089	4.3169	9.09915	9.25566	12.3717	6.02237	9.16613	1.58291	1.29263	0.199256	0.0747552	GFAP	none	Astro
ENSMUSG00000006215	Zbtb17	2385	7.9315	7.49167	6.58658	6.66644	5.38725	1.85696	4.45822	7.45649	2.59182	3.68905	3.77128	4.41603	5.50836	4.22553	5.13189	3.05946	2.4949	2.54486	2.30999	2.57416	12.3729	12.3941	11.8632	2.95606	2.71223	1.22801	1.12864	1.16682	1.26472	none	none	none
ENSMUSG00000006216	Clcnkb	2064	0	0	0	0	0	0	0	0	0	0	0	0	0	0	0	0	0	0	0	0	NA	NA	NA	0.0285692	0.00958605	0	0	0	0	none	none	none
ENSMUSG00000006218	Fam131c	822	1.2785	0.658691	0.424682	0	1.17232	0	16.8159	8.05999	1.36728	0.274452	1.15181	0.228802	0	0	0.316808	0.837773	0.475886	3.28507	0.633839	0.144833	6.57832	5.95927	11.0451	2.09085	1.03328	0.796032	0.0965899	0	0	PV	N	none
ENSMUSG00000006219	Fblim1	1128	0.186334	0.800005	0.309476	0.829133	0	0.654381	0	3.40045	0	0	0	0	20.964	16.7518	14.3137	0.517969	0.579667	1.09321	0	4.19717	NA	NA	NA	0.545968	0.146221	0.250601	0.944826	1.06033	1.07448	Cx3cr1	none	none
ENSMUSG00000006221	Hspb7	510	0	0.353885	0	0	0	0	0	0.683727	0	0	0.464112	0	0	0	0	0.160871	0	0.296204	0.207523	0	NA	NA	NA	0.137504	0.0658021	0.10168	0	0.156736	0	none	none	none
ENSMUSG00000006235	Epor	1524	2.06875	1.65796	1.37437	0.920534	1.4754	0.484345	0.697693	0.686419	0.737471	0	0.155313	0.246818	3.06502	1.32256	1.53789	1.43315	0.970921	0.771627	0.181476	1.57297	8.95229	8.80481	5.45087	2.04963	1.08406	2.15235	1.90498	0.921415	0.310447	none	none	none
ENSMUSG00000006241	Ccdc159	1236	1.87058	3.65051	1.12974	0.378342	1.81918	0.597202	4.30131	2.53908	0.454654	0.91262	1.72352	1.36948	0	0.203841	0	1.68569	0.949777	1.77892	1.22355	0.09484	9.36176	9.35619	9.20965	1.61353	1.27501	0.333452	0.0789941	0	0	none	none	none
ENSMUSG00000006262	Mob1b	666	69.1148	63.1413	69.713	77.2364	68.9696	86.4491	91.0018	90.5784	95.3463	103.315	75.7005	75.1172	49.5338	45.3959	48.0949	6.0943	6.29557	6.54394	6.42141	5.60511	9.67567	9.62188	9.75778	2.25096	1.774	0.0358904	0.0303316	0.0765124	0.396704	none	none	none
ENSMUSG00000006269	Atp6v1b1	1542	0	0	0	0.606525	0	0	0	0.226135	0	0	0	0	0	0	0	0	0.265647	0.104844	0	0	NA	NA	NA	0.0565835	0	0	0	0	0	none	none	none
ENSMUSG00000006270	Vax1	1017	0.206671	0.532393	0	0.459814	0	0	0	1.37149	1.10512	0.443657	1.39644	1.10959	0	0.247736	0.76819	0.317715	0.205732	0.86832	0.987852	0.42077	2.46015	4.30777	9.3582	0.713696	0.443607	0	0.3012	1.12014	0.189838	none	none	none
ENSMUSG00000006273	Atp6v1b2	1536	873.99	914.509	875.677	642.993	801.574	815.032	546.179	564.595	505.977	145.553	122.047	113.017	147.682	166.653	129.869	9.79613	9.5588	9.07659	6.99856	7.21983	15.8262	15.6352	16.0228	8.13309	7.29002	4.56331	2.89561	2.34788	2.03512	none	none	none
ENSMUSG00000006276	Eps15l1	2724	28.0092	28.8213	25.118	22.1455	18.3956	25.4719	25.3721	25.9861	27.6438	10.2696	9.81894	9.38996	18.6483	17.4809	16.0609	4.82355	4.52383	4.77262	3.43645	4.20138	12.5078	12.3087	12.9039	3.65992	3.23164	0.961158	0.437431	0.748768	1.12708	none	none	none
ENSMUSG00000006281	Tep1	7890	0.82582	0.571867	0.752156	0.592688	0.325693	0.841987	2.15622	0.883905	1.42447	0.91498	1.10999	1.00116	6.14227	5.52432	5.54498	0.779566	0.666111	1.3151	1.00627	2.75215	NA	NA	NA	0.782409	0.771181	0.241484	1.58257	1.47688	1.98136	Cx3cr1	none	none
ENSMUSG00000006288	Ttc5	1323	16.3636	15.6881	15.5678	12.0177	11.1685	7.81103	12.8591	11.3334	10.6189	9.71971	11.4502	16.0639	10.592	14.2827	11.6134	4.07666	3.50238	3.65579	3.74537	3.71839	12.0446	12.277	11.1715	3.48285	3.53688	0.449582	0.388579	0	1.05463	none	none	none
ENSMUSG00000006289	Osgep	1008	12.7195	13.9658	10.3896	15.3093	15.9333	19.7717	6.32907	10.0321	6.68991	19.6952	29.822	30.7862	48.9468	38.9919	44.1778	3.73966	4.17031	3.11831	4.79534	5.4931	11.3634	12.0903	11.5108	2.65076	3.85732	1.67909	2.24316	2.59226	2.47173	none	none	none
ENSMUSG00000006299	Aamp	1311	104.531	92.0991	101.984	110.22	119.077	98.5315	60.0176	62.2395	36.0061	75.544	83.2323	92.5314	95.3101	93.3993	81.4422	6.6516	6.78498	5.74831	6.40547	6.5086	13.3389	13.6339	13.7593	6.19889	7.04162	6.51109	6.4893	6.42336	4.85515	none	none	none
ENSMUSG00000006301	Tmbim1	930	2.26005	2.32879	2.62755	3.5198	0.690785	0.793701	5.71658	2.99958	1.2085	150.4	155.762	177.559	54.6216	48.2222	42.2826	1.76785	1.41581	2.10709	7.34199	5.62572	6.19592	6.34043	7.35242	4.15704	5.90063	2.17998	2.60116	2.65994	1.93178	none	none	none
ENSMUSG00000006304	Arpc2	903	329.592	337.778	339.038	694.973	726.736	799.449	195.465	188.831	189.807	169.387	144.954	134.548	844.145	732.405	774.327	8.39433	9.53408	7.58772	7.23486	9.61586	15.2375	16.0743	14.0453	6.40769	6.11714	3.1554	3.82196	3.95704	3.8204	none	none	none
ENSMUSG00000006307	Kmt2b	8166	2.83129	2.32066	1.83821	1.88977	1.6521	1.71745	2.60417	2.22048	0.963426	1.35371	1.39131	1.40492	2.39532	2.59167	2.07287	1.73555	1.46106	1.55059	1.25297	1.74558	10.9114	10.2918	10.3621	2.63227	2.0635	1.3483	1.26052	0.790588	1.45679	none	none	none
ENSMUSG00000006310	Zbtb32	1398	0	0	0	0	0	0	0	0	0	0	0	0	0.208829	0	0	0	0	0	0	0.0970844	NA	NA	NA	0.422233	0.20581	0	0.181404	0	0	none	none	none
ENSMUSG00000006311	Etv2	1008	0	0	0	0	0	0	0	0	0	0	0	0	0	0	0	0	0	0	0	0	NA	NA	NA	0	0	0	0	0	0	none	none	none
ENSMUSG00000006313	Upk1a	774	0	0.23318	0	0	0	0	0	0	0.726037	0.582945	0	0.485983	0	0	0	0.107991	0	0.31268	0.439686	0	NA	NA	NA	0.214125	0.172061	0.153116	0.0337202	0	0	none	none	none
ENSMUSG00000006315	Tmem147	696	60.0959	73.6446	69.7175	66.5165	49.3822	36.0587	88.607	137.777	113.844	66.4482	73.7979	93.4973	36.4929	36.1993	41.1577	6.10474	5.69076	6.83806	6.30222	5.28355	12.488	12.2218	13.5327	5.84248	5.73155	6.04789	6.03434	5.50165	5.29964	none	none	none
ENSMUSG00000006333	Rps9	585	114.973	120.938	128.298	143.886	137.82	150.152	141.771	187.762	138.327	141.916	165.486	193.219	359.813	338.514	296.029	6.93549	7.17944	7.29419	7.39123	8.377	13.9059	14.3857	14.2662	6.60377	7.04097	7.5243	9.68994	8.2441	7.86405	none	none	none
ENSMUSG00000006335	Tfpt	780	18.3238	18.5109	17.4544	28.7773	21.4143	20.8194	21.811	20.5644	14.409	13.0154	10.9245	12.7795	19.4629	15.1814	12.6869	4.25523	4.62471	4.31673	3.72681	4.06842	11.342	11.6314	11.3426	3.70929	3.78311	1.98559	0.978261	1.7198	1.42975	none	none	none
ENSMUSG00000006342	Susd2	2463	11.8618	11.7976	7.2284	1.89862	1.82583	0	0.863406	2.54836	4.56316	2.74786	4.42066	2.36717	0.82972	0.920636	0.528657	3.49773	1.16445	1.87118	2.06301	0.815306	10.7091	7.69735	8.69408	2.4489	1.20581	1.31168	0.319035	0.192201	0.103727	none	none	none
ENSMUSG00000006344	Ggt5	1722	0.854409	0.104809	0	0	0	0	0	0.202497	0	0.26202	0.27491	0.655315	32.0425	35.4072	34.9339	0.400253	0	0.0942349	0.482761	5.13454	NA	NA	NA	0.400538	0.146221	0.149471	0.968273	2.04488	1.6963	Cx3cr1	none	none
ENSMUSG00000006345	Ggt1	1707	0.246262	0	0	0	0	0	0	0.204277	0.65841	4.88997	4.99186	5.06823	0.171027	0	0.457674	0.113817	0	0.364642	2.58095	0.27449	NA	NA	NA	0.713696	1.63227	0.275558	0.192704	0	0	GFAP	none	none
ENSMUSG00000006356	Crip2	627	264.826	240.929	236.067	78.3114	81.4564	61.2175	20.3499	11.1228	11.6513	177.745	190.641	225.271	10.7092	8.84026	6.23005	7.95579	6.2223	3.94249	7.6358	3.26201	14.0534	13.0376	9.6547	5.93074	6.7301	5.10233	3.67249	1.67373	0.654729	none	none	none
ENSMUSG00000006360	Crip1	387	0	1.86544	0	0	0	0	0	0	1.45207	13.9907	16.5138	15.0655	29.4206	20.1818	33.6455	0.697607	0	0.569515	4.01703	4.84546	4.95233	5.21658	5.94366	2.17632	3.31711	2.1861	3.65217	2.26799	1.68574	none	none	EndoSM
ENSMUSG00000006362	Cbfa2t3	1863	7.78462	7.16887	4.30974	9.28736	10.0003	5.15075	3.99516	5.05363	4.52458	0.726569	0.635259	0.403812	10.3426	10.819	9.08591	2.89163	3.19316	2.46583	0.667707	3.47021	11.5726	11.5676	8.73633	2.57531	1.6009	2.03337	1.8302	2.02787	1.89959	none	none	none
ENSMUSG00000006369	Fbln1	2118	1.78627	0.426065	0.49446	1.32473	1.97157	1.04553	1.50607	1.31709	0.265322	37.3869	42.5787	58.6959	3.85949	1.66537	2.09022	0.927719	1.29118	1.02112	5.56134	1.82308	7.13875	7.46375	6.29347	1.48543	3.59136	0.0568934	0.00864458	0.018507	0	GFAP	none	none
ENSMUSG00000006373	Pgrmc1	588	392.488	398.409	388.866	466.836	381.852	341.453	314.645	196.292	226.501	233.657	236.295	197.991	136.538	147.398	146.595	8.62298	8.63559	7.94727	7.80508	7.17503	15.729	15.0466	13.8968	6.93074	6.24793	3.26811	1.66126	2.74431	2.2327	none	none	none
ENSMUSG00000006378	Gcat	1251	7.05656	8.80044	8.92953	8.22373	5.3921	2.95021	7.64953	3.90233	3.59362	15.1482	17.407	21.649	3.50051	3.62514	1.66533	3.21135	2.70532	2.59658	4.25309	1.97465	9.99884	9.98193	8.76167	2.45418	4.04731	2.9995	2.37831	1.06257	0.220138	none	none	none
ENSMUSG00000006386	Tek	3372	0.249329	0	0	0	0.0952595	0	0	0.413643	0	0.133808	0.28078	0.111551	0.173157	0.224152	0.231687	0.115179	0.0450979	0.18635	0.233127	0.274608	6.36162	2.53061	7.44189	0.879706	0.20581	0.0199354	0.0098879	0	0.00442475	none	EC	none
ENSMUSG00000006389	Mpl	1902	0	0.0948902	0.183538	0	0	0	0	0	0.295454	0	0	0	0	0	0	0.128042	0	0.135515	0	0	NA	NA	NA	0.356144	0.0749621	0	0	0	0	none	none	none
ENSMUSG00000006390	Elovl1	840	1.2511	1.07429	1.66233	0	0	0	0	3.32096	1.33798	31.4228	30.7143	31.3459	97.3143	88.7815	74.7147	1.21986	0	1.35218	5.00724	6.4584	5.15117	5.32953	6.46043	3.04614	4.08803	3.05975	5.57502	6.25936	5.18594	none	none	none
ENSMUSG00000006392	Med8	807	23.9616	23.259	23.7917	23.1787	19.9018	24.6962	28.9867	33.7034	38.9955	22.0847	16.4251	14.2164	32.1969	28.7226	32.9151	4.62473	4.56024	5.12496	4.21532	5.01249	11.6231	11.7008	12.0585	3.12102	3.1088	3.09222	3.35815	3.33064	3.49749	none	none	none
ENSMUSG00000006395	Hyi	806	1.82542	1.56745	1.29934	1.16037	1.19559	0.915809	1.31921	3.02842	0	1.6794	4.11137	2.56679	1.81106	4.37626	4.84646	1.35844	1.06391	1.29232	1.92062	2.22587	8.58374	7.0667	10.0204	3.20163	3.51265	4.40464	4.72009	4.85702	4.8936	none	none	none
ENSMUSG00000006398	Cdc20	1500	0.560492	0.481283	0	0	0.214143	0	0.708856	2.0922	1.49854	0.1504	0.631193	0.125384	3.89257	1.51168	1.04167	0.430027	0.0994718	1.28286	0.38109	1.65473	6.60289	5.14978	7.16891	0.782409	0.578536	0.103466	0.744682	0	0.0855953	none	none	none
ENSMUSG00000006403	Adamts4	2538	1.90475	2.20446	1.2379	0.921259	0.126562	0	54.463	42.5915	32.7695	1.86666	2.05175	1.55618	0.805201	1.9854	1.84692	1.47631	0.432183	5.46841	1.49818	1.34814	6.9759	5.99478	7.73227	3.05311	3.09761	0.561852	0.147951	0	0	PV	OL	Olig
ENSMUSG00000006411	Nectin4	1527	2.75291	1.65471	0.685833	1.83745	1.26214	0.483394	11.1412	6.16563	4.04812	0.590962	0.310016	0.246333	36.5168	37.9488	32.7439	1.43179	1.13378	3.02118	0.467214	5.19914	7.22582	8.04243	10.0183	NA	NA	NA	NA	NA	NA	Cx3cr1	none	none
ENSMUSG00000006412	Pfdn2	465	90.402	78.4026	78.0758	134.758	111.216	95.2441	198.937	124.482	146.229	69.8631	61.5922	56.2204	151.936	141.957	156.81	6.38013	6.84222	7.29966	5.99001	7.24064	13.1068	13.3736	12.7965	6.51885	6.08293	4.13076	3.29645	1.81451	1.25233	none	none	none
ENSMUSG00000006418	Rnf114	690	15.2308	16.4787	18.2133	14.91	14.8969	13.907	32.3608	25.2682	26.0616	34.9843	33.9609	34.8894	83.7749	80.6962	66.8024	4.14086	3.96082	4.85284	5.15427	6.28709	13.2182	13.1713	13.0061	4.51349	4.10098	2.7337	3.76119	2.61499	2.85943	none	none	none
ENSMUSG00000006423	C330007P06Rik	684	4.9166	6.33267	5.10364	6.15304	4.69613	4.31662	4.66353	8.66654	13.1451	14.5123	7.26702	13.4732	17.0727	15.1021	20.9399	2.68952	2.59819	3.29647	3.67252	4.22534	13.044	13.1708	13.42	3.10098	3.46902	0.676977	0.236665	0.719599	0.682878	none	none	none
ENSMUSG00000006435	Neurl1a	1725	19.7391	21.9716	19.0228	20.874	18.0625	17.5442	11.0951	9.70298	8.79578	4.05425	2.46989	1.74447	4.56954	6.28043	4.67994	4.40902	4.30939	3.44157	1.90927	2.62682	12.4295	12.5512	10.9715	5.40054	4.36457	2.28396	1.62889	0.814194	0.85535	none	none	none
ENSMUSG00000006442	Srm	909	64.5121	68.698	53.381	41.1556	39.931	46.2861	36.2616	28.7707	14.2188	30.2785	33.8511	40.1393	27.6206	29.1028	26.9297	5.98179	5.44154	4.777	5.16013	4.85222	12.8011	12.8839	12.8948	4.78031	4.92125	5.62728	5.25099	5.08344	4.6005	none	none	none
ENSMUSG00000006445	Epha2	2934	0	0	0.118981	0	0	0	1.0872	0.237696	0	0	0.080674	0.0641021	26.7664	20.094	14.4676	0.0561121	0	0.527704	0.0679948	4.42241	NA	NA	NA	0.214125	0.111031	0.0952494	0.686147	1.41855	0.626275	Cx3cr1	none	none
ENSMUSG00000006456	Rbm14	2010	12.0255	14.1871	10.0732	9.07344	11.666	8.81364	2.11599	3.81662	2.79578	1.79582	3.65056	2.8071	7.98849	6.51804	4.66417	3.71097	3.43976	1.96697	1.90734	2.88562	NA	NA	NA	3.86987	4.13969	1.4449	1.74448	2.37801	1.61861	none	none	none
ENSMUSG00000006457	Actn3	2703	0.544318	0.400624	0.645744	0.865022	0.237673	0	0.786744	0.129005	0	0.166925	0	0	0	0	0	0.613747	0.451609	0.384326	0.0781204	0	NA	NA	NA	0.526069	0.318076	0.307877	0.125408	0.101938	0.0462846	none	none	none
ENSMUSG00000006463	Zdhhc24	855	0.98332	1.26653	2.04146	1.09387	1.12707	0.863324	13.6797	6.11756	0.657255	3.43017	3.87575	5.05934	3.07308	4.7148	2.74122	1.28122	1.02012	2.96683	2.35664	2.17303	8.9315	8.35181	9.19065	3.21101	3.17206	1.28784	1.07067	1.52481	1.36952	none	none	none
ENSMUSG00000006464	Bbs1	1782	12.5026	10.7357	9.59897	7.61016	10.2746	6.21332	0	5.87038	4.09954	6.70975	7.96961	10.132	2.78509	2.26215	2.63047	3.57842	3.17515	2.11214	3.21264	1.83157	10.2229	10.0503	9.40746	3.06695	2.71516	0.948379	0.578344	0.157574	0.153166	none	none	none
ENSMUSG00000006469	Slc34a3	1806	0	0	0	0	0	0	0	0	0	0	0	0.104139	0.161652	0	0	0	0	0	0.0492308	0.0757159	NA	NA	NA	0.263034	0.102098	0.233271	0.213991	0	0	none	none	none
ENSMUSG00000006471	Ndor1	1797	0.701785	0.602608	0.388524	0.520457	0.536252	0.821527	1.7751	0.388092	0	0.125542	0.526872	0.313982	0.649845	0.841227	1.44917	0.645523	0.701397	0.783301	0.402867	0.98556	10.3329	10.3772	10.5799	2.18269	2.16779	1.55264	1.66294	1.51486	2.55751	none	none	none
ENSMUSG00000006476	Nsmf	1599	59.1514	53.501	55.4525	145.056	128.365	123.254	29.2586	23.9882	18.6263	16.3662	14.5068	12.1149	6.93798	7.40558	4.39727	5.83377	7.05773	4.64141	3.93822	2.85737	14.9921	15.9637	14.1673	6.96324	5.63324	7.13515	5.36574	2.90383	2.64692	none	none	none
ENSMUSG00000006488	Prl7a1	801	0	0	0	0	0	0	0	0	0	0	0	0	0	0	0	0	0	0	0	0	NA	NA	NA	0	0	0	0	0	0	none	none	none
ENSMUSG00000006490	Prl8a9	726	0	0	0	0	0	0	0	0	0	0	0	0	0	0	0	0	0	0	0	0	NA	NA	NA	0	0	0	0	0	0	none	none	none
ENSMUSG00000006494	Pdk1	1305	46.5466	47.4368	43.8702	25.0837	37.1674	36.7657	16.2955	9.61933	8.6123	21.782	15.2357	20.0326	78.2988	65.4484	86.4063	5.55309	5.0877	3.6449	4.32314	6.28017	11.5616	11.6169	10.0297	3.488	3.05427	1.03109	1.68824	1.11409	2.09603	none	none	none
ENSMUSG00000006498	Ptbp1	1668	2.64621	2.70505	0.837144	1.96248	0.38515	1.32759	6.37461	2.29958	1.68451	17.0417	18.5895	20.1832	111.141	90.3265	89.4595	1.61485	1.15385	2.15475	4.29313	6.61435	NA	NA	NA	2.68706	3.87119	1.78288	4.0249	4.28968	3.45654	Cx3cr1	none	none
ENSMUSG00000006517	Mvd	1206	13.0712	12.7205	11.5784	7.75508	8.25677	8.56881	7.0533	7.80673	2.79578	31.6139	30.4213	39.4553	7.02018	4.38714	5.61428	3.75025	3.20062	2.78351	5.12227	2.73852	11.5196	10.4345	9.83568	3.74631	5.91584	2.45499	1.76338	1.84365	0.981483	none	none	none
ENSMUSG00000006519	Cyba	579	1.08904	0.623424	0.602917	0	0	0	3.67283	0	0	18.7026	15.5345	23.0628	652.964	632.262	664.309	0.82521	0	1.15334	4.32912	9.34617	NA	NA	NA	2.67356	3.7845	2.80991	7.77698	7.28345	6.71031	Cx3cr1	none	none
ENSMUSG00000006522	Itih3	2670	1.41697	0.811152	0.653725	0.175143	0.120305	0	2.78764	2.22019	2.31516	279.76	266.573	307.542	4.81104	4.81248	4.2915	0.971308	0.135512	1.78283	8.15798	2.49527	4.57196	5.6067	7.99442	4.00899	7.16591	2.0118	1.15112	0.245346	0.0394953	GFAP	AS	none
ENSMUSG00000006526	Stimate	867	4.36369	6.03686	5.63696	3.2362	4.44588	7.66237	6.13198	9.25042	16.2039	10.6685	12.5583	13.2325	9.09165	11.6239	10.5128	2.66581	2.61231	3.52717	3.71733	3.51215	8.65958	8.12933	9.14102	NA	NA	NA	NA	NA	NA	none	none	none
ENSMUSG00000006527	Sfmbt1	2592	12.9744	14.1349	14.1413	17.8609	16.4821	12.815	15.1781	10.6278	10.8401	3.82962	3.74406	2.61216	28.2707	22.0648	26.7248	3.88266	4.06344	3.72414	2.13595	4.73805	11.4678	11.6696	11.2734	2.68706	1.73408	0.221127	0.223908	0.251418	0.414192	none	none	none
ENSMUSG00000006529	Itih1	2736	0	0	0	0	0	0	0	0	0	0.082456	0	0	0	0	0	0	0	0	0.0391178	0	NA	NA	NA	0	0	0	0	0	0	none	none	none
ENSMUSG00000006538	Ihh	1236	0	0.14602	0	0	0	0	0	0	0	0	0	0	0	0.203841	0	0.0685655	0	0	0	0.09484	NA	NA	NA	0.137504	0.0473057	0.196527	0.0907326	0	0	none	none	none
ENSMUSG00000006542	Prkag3	1470	0	0	0	0	0	0	0	0.948845	0	0	0	0	0	0	0	0	0	0.396468	0	0	NA	NA	NA	0.0565835	0.0473057	0.0652083	0	0	0	none	none	none
ENSMUSG00000006546	Cryba2	594	1.76923	0.30384	0.587692	0	0	0	1.79004	2.93519	0.946048	0	0	0	0.982973	0.424154	0	0.916034	0	1.53128	0	0.554876	5.02982	0.814801	3.35579	0.238787	0.0191088	1.03623	0.359203	0	0	none	none	none
ENSMUSG00000006567	Atp7b	4389	0.143667	0.123364	0.159075	0.213092	0.0731864	0.33636	0.242261	0.715039	0.512147	2.87846	3.18185	2.48539	0.133034	0.229617	0.296669	0.191607	0.272078	0.575134	1.94432	0.286613	NA	NA	NA	0.400538	0.695994	0	0	0	0	GFAP	none	none
ENSMUSG00000006570	Defb2	216	0	0	0	0	0	0	0	0	0	0	0	0	0	0	0	0	0	0	0	0	NA	NA	NA	0	0	0	0	0	0	none	none	none
ENSMUSG00000006574	Slc4a1	2790	0	0.0646886	0	0	0.115131	0	0.762211	0.124982	0.201417	0	0.169676	0.0674106	0	0	0	0.030778	0.0543302	0.446648	0.109733	0	NA	NA	NA	0.0565835	0.0379679	0.0568989	0.0179772	0	0	none	none	none
ENSMUSG00000006575	Rundc3a	1341	82.287	77.5221	79.3976	86.1334	87.6694	72.6583	81.6691	61.6272	49.4485	25.7396	21.181	20.757	6.53116	12.7759	6.40845	6.33513	6.37771	6.02787	4.55822	3.25879	14.8517	15.0403	14.3913	6.73796	5.62215	6.32154	4.60122	2.14103	1.32986	none	none	none
ENSMUSG00000006576	Slc4a3	3684	20.1969	18.7144	19.4254	13.2013	12.2941	8.01457	23.0898	19.2145	21.3554	6.61367	6.68201	5.61572	1.50568	2.05169	1.90859	4.35372	3.60525	4.47378	2.86865	1.49671	14.2805	13.2758	15.0139	4.71699	4.006	3.68332	2.08246	0.452724	0.209477	none	none	none
ENSMUSG00000006585	Cdt1	1674	1.00447	1.18596	1.04268	1.1174	0.383769	0	2.5407	1.87473	1.00708	0.4043	0.282793	0.786456	3.66237	2.4081	2.64461	1.05499	0.585337	1.48929	0.576457	1.96533	7.51197	6.24358	8.7158	1.02857	0.936088	1.07559	1.84874	2.99232	1.67933	none	none	none
ENSMUSG00000006586	Runx1t1	1815	25.8243	28.9367	25.5806	23.446	29.0244	26.4348	18.7466	14.217	14.2423	4.4747	4.69482	3.83405	2.2519	2.91509	1.29132	4.796	4.77092	4.06482	2.41536	1.65662	10.3575	10.96	9.92246	2.0635	0.900464	0.370245	0.0422949	0.0374277	0.0180866	none	none	none
ENSMUSG00000006587	Snai3	864	1.45962	0.626671	1.21211	0.54124	0	0	0	0	0	0	0	0	0	0	0	1.07002	0.239292	0	0	0	6.02412	4.22838	3.03701	0.238787	0.0931094	0	0.0501227	0	0	none	none	none
ENSMUSG00000006589	Aprt	543	41.8047	43.2091	46.9309	45.6435	33.1271	27.1875	48.9542	35.3196	25.8726	39.0541	27.898	46.0664	41.9365	50.1111	49.8771	5.49126	5.18267	5.23708	5.27325	5.5942	12.4322	12.5128	12.162	4.31615	4.3453	5.65377	6.34573	6.03255	5.06445	none	none	none
ENSMUSG00000006599	Gtf2h1	1662	18.4639	19.1123	16.5933	17.1634	22.2261	20.4299	12.7952	20.771	23.3302	6.37977	8.2602	6.11075	12.296	8.79239	11.2816	4.25221	4.38817	4.31943	2.98494	3.55949	12.9136	12.7249	12.4842	3.72028	3.12102	1.38977	1.22143	0.844387	1.04295	none	none	none
ENSMUSG00000006611	Hfe	1080	1.55692	0.334224	0.969692	0.432992	0.594843	0.683465	12.7988	6.45742	2.60163	10.8622	15.999	14.9764	90.8267	72.7848	87.7699	0.966145	0.651162	3.05067	3.90167	6.40589	NA	NA	NA	1.51602	2.46292	0.963121	3.21112	4.2458	3.60718	Cx3cr1	none	none
ENSMUSG00000006638	Abhd1	1240	0.508511	0.291099	0.84457	0	0.518089	0	1.71498	0	0.906375	2.91096	3.62681	3.79184	0.470876	0.60955	0.840052	0.630461	0.229829	0.905954	2.1516	0.713836	7.48298	7.62041	7.38803	2.51096	2.79494	0.872125	0.847336	0.85085	2.01906	GFAP	none	none
ENSMUSG00000006641	Slc5a6	1905	5.51666	4.16859	5.31422	3.19118	3.87819	0.774952	11.1631	8.60311	7.07972	4.2633	6.83378	6.21982	2.60526	2.90963	2.87073	2.58492	1.85391	3.3145	2.75965	1.92418	9.94405	9.36476	12.1025	2.69599	2.43118	0.844189	0.426132	0.96009	0.893318	none	none	none
ENSMUSG00000006642	Tcf23	630	0.333626	0	0	0	0	0	0	0	0	0	0	0.298532	0	0	0	0.15213	0	0	0.136862	0	NA	NA	NA	0.0840643	0.00958605	0.131093	0	0	0	none	none	none
ENSMUSG00000006649	Nphs1	3771	0.167211	0	0	0	0	0	0	0	0	1.6751	0.941517	2.04484	0	0	0	0.0782506	0	0	1.35266	0	NA	NA	NA	0.31034	1.27898	0.0644769	0	0	0	GFAP	none	none
ENSMUSG00000006651	Aplp1	1965	777.202	699.422	615.391	695.854	581.293	544.309	313.845	253.229	227.641	489.66	548.319	555.038	41.6	55.0053	42.0112	9.44778	9.24829	8.05477	9.0553	5.56088	17.4077	16.8805	15.1825	8.80129	9.48368	6.97765	4.74007	3.40291	0.883835	none	none	none
ENSMUSG00000006673	Qrich1	2334	77.1758	71.8368	70.8947	65.9171	69.6379	63.8837	72.4346	64.8398	58.7474	35.3768	33.7704	32.7158	51.534	52.0303	54.4486	6.21534	6.07638	6.05182	5.1274	5.74607	13.62	13.8	13.6033	4.67243	4.23879	0.496918	0.710642	0.758182	0.775594	none	none	none
ENSMUSG00000006675	P4htm	1512	86.3258	83.0787	74.5739	92.1654	73.718	68.8347	143.459	106.547	106.295	26.2603	33.1877	24.6289	3.86168	6.16538	6.02815	6.36328	6.30815	6.90409	4.85926	2.66715	11.9397	11.5983	11.7648	5.31252	4.81592	2.95116	1.4091	0.701876	0.198049	none	none	none
ENSMUSG00000006676	Usp19	4083	39.9984	37.7936	33.5153	32.1833	30.5245	29.8294	18.4896	17.8492	15.1396	15.8025	13.2755	20.5902	20.8786	15.6117	17.731	5.25181	4.99303	4.18265	4.1339	4.25352	13.8353	14.0983	13.4571	4.39232	4.40236	2.85927	2.5596	3.35062	3.08753	none	none	none
ENSMUSG00000006678	Pola1	4398	1.09919	1.35422	0.793745	2.02023	1.89895	1.00701	1.20883	1.7443	0.894422	2.82128	1.45312	1.83885	5.77513	2.80705	3.43432	1.05824	1.40167	1.19062	1.603	2.32351	5.96836	5.71429	7.63386	0.765535	1.00959	0.00756311	0.0121296	0.0160681	0.0109248	none	none	none
ENSMUSG00000006699	Cdc42	576	626.54	677.431	734.541	622.696	714.926	716.356	509.491	563.006	700.49	625.882	472.984	467.576	1337.06	1257.11	1251.9	9.41046	9.42135	9.20944	9.03107	10.3253	14.8772	14.8149	14.8794	6.23458	6.71287	2.6064	3.36475	4.41417	4.48631	none	none	none
ENSMUSG00000006705	Pknox1	1311	7.3749	10.738	11.9825	11.0576	12.2508	9.57163	8.92153	13.831	15.8598	11.7016	9.74955	9.61179	18.9284	17.8727	18.4735	3.4636	3.58015	3.79398	3.50517	4.27983	10.0136	10.2759	8.5564	2.47508	2.42939	0.844649	1.36431	1.52064	2.38914	none	none	none
ENSMUSG00000006711	D130043K22Rik	3246	46.2328	40.422	43.7706	39.4735	29.1924	39.5677	13.1027	13.4281	14.196	5.69907	5.10438	3.18674	1.61891	2.71662	1.84522	5.47493	5.21249	3.86548	2.50167	1.61365	12.5672	11.624	11.0649	2.82375	1.3599	0.816123	0.130171	0.052511	0	none	none	none
ENSMUSG00000006715	Gmnn	621	7.44615	9.00953	9.55638	6.02423	7.24156	10.6977	29.1076	27.5142	31.6721	5.44927	6.86079	7.87433	15.5139	7.30282	7.12895	3.27362	3.16797	4.92748	2.95012	3.45705	8.81458	8.84126	10.4891	1.8953	1.74272	0.404465	0.989711	0.54928	0.68407	none	none	none
ENSMUSG00000006717	Acot13	423	258.383	265.388	307	421.2	464.737	504.31	412.243	488.84	555.31	430.933	382.185	334.801	180.825	161.413	185.308	8.11855	8.85927	8.92619	8.58361	7.46637	12.8917	13.9573	13.9534	5.94626	6.19876	3.37961	2.74344	2.25034	2.10729	none	none	none
ENSMUSG00000006720	Zfp184	2214	1.13921	0.978218	1.89208	1.05608	1.741	2.00038	0	0.629992	0.253818	0.917072	1.06909	0.339793	0.527449	0.341392	0.588113	1.22435	1.37804	0.37251	0.828079	0.571095	7.14451	6.92967	4.64066	0.941106	0.532733	0.056735	0.0188766	0.187955	0.406483	none	none	none
ENSMUSG00000006724	Cyp27b1	1524	0	0	0	0	0	0	0	0	0	0	0	0	0	0	0	0	0	0	0	0	NA	NA	NA	0.0840643	0	0	0.0612626	0	0.080257	none	none	none
ENSMUSG00000006728	Cdk4	912	20.9724	18.6022	20.287	27.6887	17.6105	16.1873	22.1518	19.4997	16.0206	45.5157	45.938	45.3691	72.0254	59.6717	60.5354	4.38914	4.42596	4.338	5.54249	6.02409	11.6384	12.0487	11.7836	4.57168	5.36784	3.85673	4.75755	4.4048	3.64252	none	none	none
ENSMUSG00000006731	B4galnt1	1602	46.5765	48.5564	41.6205	42.6181	40.3023	29.4888	16.5931	26.3376	22.0993	6.05542	7.38756	4.34382	12.2098	13.8398	12.0292	5.54178	5.26565	4.50313	2.79263	3.77536	13.5287	13.1559	12.5887	5.68089	4.2765	3.63211	3.67626	3.47367	3.41466	none	none	none
ENSMUSG00000006732	Mettl1	807	11.4599	10.7349	9.51668	17.9635	18.7077	15.5495	11.8582	3.45676	7.65983	5.87062	7.03933	9.55526	13.747	6.55625	10.0036	3.53238	4.20217	3.11408	3.08549	3.47278	9.64616	10.0729	9.94773	2.66903	2.40962	2.10668	1.87441	1.74442	2.18357	none	none	none
ENSMUSG00000006736	Tspan31	633	51.135	69.8545	47.4276	48.019	42.1182	34.983	78.9485	68.8587	71.9086	121.532	123.023	168.169	94.5471	98.7092	74.4634	5.8364	5.41639	6.2141	7.11452	6.49569	13.1908	12.4762	12.9274	5.23266	5.99714	4.02858	5.12336	5.74324	5.13294	none	none	none
ENSMUSG00000006740	Kif5b	2892	73.6954	78.8201	91.6178	123.861	130.063	138.338	118.02	125.156	169.052	217.253	174.577	180.532	179.688	149.234	174.421	6.36418	7.0417	7.1128	7.58336	7.39901	11.6503	12.0394	11.9	5.08321	4.71955	3.14954	2.46041	1.40156	2.20018	none	none	Olig
ENSMUSG00000006763	Saal1	1425	7.2274	7.85252	9.30904	6.23508	5.18452	10.8779	14.9233	10.5222	8.28141	5.85768	6.97634	8.05095	7.3754	4.77374	7.30993	3.19056	3.07596	3.6138	2.99307	2.90426	9.76921	10.0206	9.41069	1.73118	1.73697	0.594892	0.691159	0.617336	0.580758	none	none	none
ENSMUSG00000006764	Tph2	1467	1.00293	0.861192	0.475922	0	0.437921	0	0	0.713089	0.383063	0.922698	0.322696	1.66665	0.796027	1.37395	0.177516	0.831888	0.196574	0.449307	0.978695	0.833899	6.27038	6.45997	6.33517	0.356144	0.572081	0.0819858	0.018306	0	0	none	none	none
ENSMUSG00000006777	Krt23	1269	0	0	0	0	0	0	0	0	0	0	0	0	0	0	0	0	0	0	0	0	NA	NA	NA	0.137504	0.00958605	0.0280224	0	0.0486631	0	none	none	none
ENSMUSG00000006782	Cnp	1263	32.6177	22.8638	32.8912	8.8861	6.10385	4.09105	42.9355	31.7503	21.3569	263.11	254.689	366.025	120.66	99.9411	96.7025	4.92873	2.87977	5.04502	8.20754	6.73834	10.0435	9.96386	11.5665	7.25908	8.82339	6.18124	5.39794	4.03788	3.09212	none	OL	Olig
ENSMUSG00000006784	Ttc25	1875	1.00889	1.92513	1.48945	0.997613	0.342629	0.393676	2.83543	1.11584	0.299708	1.56416	2.39853	2.30706	0.778514	0.268744	0.416666	1.30713	0.658072	1.27321	1.62757	0.57335	NA	NA	NA	0.485427	0.847997	0.0619981	0.0137387	0.0307952	0.0490972	none	none	none
ENSMUSG00000006800	Sulf2	2628	65.2628	51.7132	53.001	83.4547	72.7256	71.6234	38.0322	40.3368	42.7666	41.4629	42.9622	39.075	34.2155	25.3098	24.5751	5.84947	6.26556	5.37081	5.39803	4.85964	13.2843	12.7228	14.1454	4.48543	4.22445	0.507058	0.236842	0.242723	0.175298	none	none	ExcL5_3
ENSMUSG00000006818	Sod2	669	358.162	372.563	380.919	366.276	356.265	398.31	737.465	818.326	871.909	390.5	375.744	398.079	213.83	168.718	167.383	8.53741	8.54927	9.66219	8.60403	7.52599	15.3752	15.4455	16.102	5.24793	5.2817	3.35641	3.166	3.16613	1.67858	none	none	none
ENSMUSG00000006850	Tmco6	1485	4.95385	4.25377	3.99631	2.20432	2.37937	1.4912	1.43203	1.17408	3.40577	3.03838	4.94116	3.5462	4.71827	6.10781	3.68265	2.43331	1.59692	1.58687	2.27558	2.54504	9.52914	9.60071	8.96915	2.09761	2.41864	0.124747	0.208411	0.733436	1.39871	none	none	none
ENSMUSG00000006906	Stambp	1275	31.1568	36.6625	40.2479	37.7773	43.8364	43.999	45.0332	28.1695	33.9375	21.4098	17.4506	18.8813	28.3929	28.2576	26.7565	5.21033	5.42193	5.19824	4.33965	4.84811	12.4104	12.6567	11.9817	3.90497	3.77751	1.2541	0.771705	1.25881	0.928521	none	none	none
ENSMUSG00000006920	Ezh1	2253	33.3049	34.2057	32.2284	47.7386	48.0468	47.5058	22.6532	20.5846	21.2011	11.9158	8.92999	11.5199	25.7863	24.3784	22.4238	5.09788	5.60774	4.49055	3.55932	4.65513	12.5464	13.1523	12.2683	3.98185	3.83727	1.75305	2.12304	1.33409	1.42907	none	none	none
ENSMUSG00000006930	Hap1	1887	50.3463	61.5951	48.0992	41.3855	52.2591	44.9848	19.7218	19.4031	13.6989	39.3335	30.7318	18.0401	6.49793	10.8149	8.97035	5.76412	5.56101	4.21784	4.9245	3.28704	13.6767	13.8835	11.4992	5.58256	4.16027	5.82539	4.04598	1.52248	0.937093	none	none	none
ENSMUSG00000006931	P3h4	1332	3.15593	2.16794	2.35871	1.75537	1.92922	0	3.19305	2.35609	4.64075	25.7441	20.2579	26.5452	1.53423	4.91789	3.71465	1.83223	1.15588	2.1364	4.65434	2.13387	8.17847	7.9385	7.60641	2.71809	3.80116	2.65813	1.63715	1.49821	0.644938	GFAP	none	none
ENSMUSG00000006932	Ctnnb1	2346	349.053	371.502	284.807	261.124	307.523	268.701	179.027	190.552	128.631	321.379	308.433	386.573	261.579	212.211	220.344	8.39284	8.12988	7.38431	8.40852	7.86033	NA	NA	NA	7.01859	7.52246	3.21004	2.97722	3.11585	2.85614	none	none	none
ENSMUSG00000006941	Eif1b	342	288.85	262.278	239.871	365.08	333.425	287.055	568.951	462.895	650.682	240.112	236.005	227.67	254.383	223.953	255.086	8.04803	8.36422	9.13402	7.88017	7.93943	14.0209	14.2806	14.8176	6.74012	6.74246	5.93357	5.36156	4.89784	4.77224	none	none	none
ENSMUSG00000006948	Klk4	768	0	0	0	0	0	0	0	0	0	0	0	0	0	0	0	0	0	0	0	0	NA	NA	NA	0	0	0	0	0	0	none	none	none
ENSMUSG00000006958	Chrd	2913	2.30893	1.92067	1.79757	5.77917	5.73401	4.56112	0	0.71823	0.771648	0.309783	0.7313	0.710206	0.100221	0.0864907	0.357592	1.58931	2.6686	0.581714	0.663356	0.24054	10.4414	11.8718	9.95431	1.87971	1.36737	1.18577	0.54943	0.244293	0.182856	none	none	none
ENSMUSG00000006998	Psmd2	2727	61.7374	58.1749	55.3012	56.2461	58.3063	50.3463	64.3352	48.2069	38.9472	36.6486	30.9	39.7255	40.7885	42.0374	34.7604	5.8925	5.80648	5.6864	5.19999	5.32896	15.7349	15.6929	15.6785	5.62	5.95404	3.93581	3.52002	2.67402	2.21972	none	none	none
ENSMUSG00000007021	Syngr3	690	185.815	185.189	160.379	152.488	109.399	111.256	157.181	137.964	98.5453	28.4452	32.5888	21.2607	7.6159	9.12853	7.17088	7.47677	6.97018	7.04691	4.82942	3.16539	15.0434	14.4902	14.9106	6.38024	4.64731	5.37965	3.6156	2.00802	0.484561	none	none	none
ENSMUSG00000007029	Vars	3834	14.1987	9.13233	10.0156	12.075	10.4726	6.73838	12.4799	10.0954	7.91483	5.29577	3.82766	6.08277	20.7878	15.9685	17.9316	3.59879	3.42787	3.4807	2.6014	4.26523	11.536	11.7769	12.0284	3.15381	3.40327	1.8602	2.22492	2.45658	2.46117	none	none	none
ENSMUSG00000007030	Vwa7	2676	0.628355	0.0674444	0.130452	0	0	0	1.98671	4.16981	3.56995	0.337219	0.0884519	0.0702823	0.109097	0.470754	0.486577	0.350969	0	2.0848	0.220723	0.4388	NA	NA	NA	0.879706	0.62293	0.601728	0.486457	0.711864	0.476297	PV	none	none
ENSMUSG00000007033	Hspa1l	1926	0	0.187416	0	0	0	0	0	0	0.291772	0.117134	0.245792	0.0976508	0	0	0	0.0874246	0	0.133902	0.20605	0	NA	NA	NA	2.02857	1.37481	0.0982501	0.0496961	0	0.058439	none	none	none
ENSMUSG00000007034	Slc44a4	2124	0.395828	0.339889	0	0	0.151231	0	0	0	0	0	0.111439	0	0	0	0	0.316423	0.0709531	0	0.0526197	0	NA	NA	NA	0.111031	0.0840643	0	0.0185867	0.0464062	0	none	none	none
ENSMUSG00000007035	Msh5	2502	0	0	0	0	0	0	0	0	0	0.0901677	0	0.22551	0.116684	0.100698	0.104083	0	0	0	0.144341	0.146857	NA	NA	NA	0.111031	0.128733	0.0236198	0.136212	0	0.215569	none	none	none
ENSMUSG00000007036	Abhd16a	1677	57.2775	58.1156	53.706	37.087	27.0073	31.6912	86.2294	63.627	74.3909	35.6493	36.1327	36.5609	18.105	18.3289	15.2181	5.84213	5.04127	6.24316	5.2139	4.18724	12.9342	12.163	12.62	5.34483	5.44206	3.74304	3.66	3.56426	2.84453	none	none	none
ENSMUSG00000007038	Neu1	1230	51.2645	47.1012	34.3413	36.1178	27.9431	16.8032	72.6146	36.8545	31.0673	19.6253	17.8966	19.5721	22.7858	27.8576	24.3479	5.49939	4.80502	5.58031	4.32419	4.70028	11.9042	11.5076	12.5569	3.97636	3.68407	4.27112	4.77174	4.5649	4.28013	none	none	none
ENSMUSG00000007039	Ddah2	858	1.71479	2.52421	0.813727	0	0.374376	0.860305	17.3496	10.1603	8.51444	32.6041	37.7943	33.7571	24.1584	27.8963	37.9394	1.42452	0.497291	3.70134	5.1586	4.95411	7.64937	7.92055	10.3038	3.10769	4.8911	4.21269	5.14554	5.69683	4.94633	none	none	none
ENSMUSG00000007041	Clic1	726	1.73706	1.49158	0.961678	1.93236	0	0	36.6145	13.9288	27.8654	36.0462	33.255	40.931	644.607	573.649	746.814	1.26109	0.717316	4.76215	5.23818	9.3576	6.62366	5.83067	7.72136	3.33628	4.37249	2.55317	6.14733	6.20474	5.38826	Cx3cr1	none	none
ENSMUSG00000007050	Lsm2	396	37.6846	31.4475	35.2615	28.3413	34.8794	41.0079	64.4415	56.3557	41.1531	31.903	26.8974	21.8471	61.9273	45.8086	35.5113	5.1618	5.15958	5.78092	4.80129	5.6073	10.3868	10.5026	10.1745	3.29278	2.90817	2.85975	4.01216	4.26483	3.35689	none	none	none
ENSMUSG00000007080	Pole	6852	0.490799	0.395099	0.407576	0.477732	0.562548	0.107726	0.465536	0.101781	0.246039	0.329246	0.172721	0.548965	0.97996	0.257389	0.304047	0.517183	0.467456	0.346099	0.433292	0.598173	NA	NA	NA	0.189034	0.385891	0.00836137	0.0260642	0.0460586	0.042365	none	none	none
ENSMUSG00000007097	Atp1a2	3063	47.6913	36.709	36.2423	7.17553	7.76034	7.71157	51.7236	37.7958	28.437	5006.79	5598.59	6186.04	62.9064	72.878	68.016	5.36507	3.09578	5.33338	12.4507	6.10713	11.6246	10.7417	12.2968	7.55336	10.5272	5.73338	3.5591	2.04662	0.868696	GFAP	AS	EndoSM
ENSMUSG00000007107	Atp1a4	3099	0	0	0	0	0	0	0	0	0	0.0727976	0.381893	0.242756	0	0	0	0	0	0	0.301567	0	NA	NA	NA	0	0.0840643	0	0	0	0	none	none	none
ENSMUSG00000007122	Casq1	1218	0	0	0	0.383934	0	0	0	0	0	0.370443	0.388666	0.308827	0	0	0	0	0.173739	0	0.439334	0	NA	NA	NA	0.464668	0.519374	0.225451	0.0668209	0	0.0388312	none	none	none
ENSMUSG00000007207	Stx1a	867	532.371	493.565	508.937	167.204	154.865	127.706	13.4903	12.0658	3.88895	28.883	31.6689	13.2325	13.8058	12.7863	11.1135	9.00176	7.23769	3.43496	4.67778	3.76219	15.9043	14.3452	12.0191	6.70127	5.50038	3.75317	2.07475	0.832808	0.572102	none	none	ExcL4
ENSMUSG00000007209	Ceacam9	705	0.596268	0.256002	0.495162	0	0	0	0	0	0	0	0	0	0	0	0	0.535201	0	0	0	0	NA	NA	NA	0.356144	0	0	0.0770782	0	0	none	none	none
ENSMUSG00000007216	Zfp775	1617	2.07975	1.56261	2.37476	1.73518	0.993244	1.36947	3.9454	0.64694	2.08517	2.51131	3.07399	3.37303	0.722184	0.623246	1.12734	1.5877	1.24243	1.68967	1.99498	0.86731	9.91688	10.3468	10.7692	1.58496	2.09761	0.7962	0.572011	0.742513	0.350869	none	none	none
ENSMUSG00000007279	Scube2	2994	0.421212	0.180843	0.233192	0.156189	0.751004	0.739621	1.06542	0.232933	0.563079	0.376753	0.474343	0	0	0.252452	0	0.354357	0.631279	0.696417	0.360307	0.116565	NA	NA	NA	0.400538	0.0565835	0.0614689	0.054628	0	0	none	none	none
ENSMUSG00000007338	Mrpl49	501	58.7342	46.8315	51.562	38.2692	48.0861	76.6135	101.872	113.45	128.991	52.2346	45.3552	54.8084	51.2794	37.7167	41.0636	5.73812	5.78981	6.85513	5.69486	5.47097	13.3734	13.5062	14.0336	4.48156	4.61196	3.69806	3.88935	3.39291	3.00126	none	none	none
ENSMUSG00000007379	Dennd2c	2763	0.0760712	0	0	0	0	0	0	0	0	0	0	0	5.4944	2.55321	3.6758	0.0361264	0	0	0	2.29508	NA	NA	NA	0.137504	0.0285692	0.0423578	0.0699736	0.401277	0.687832	Cx3cr1	none	none
ENSMUSG00000007411	Mark3	2394	45.4785	44.9318	50.3073	42.9736	49.2422	44.3995	27.0929	31.1704	34.2711	31.7573	23.7291	26.9465	22.8042	18.2067	18.6012	5.58213	5.54035	4.99299	4.83176	4.38341	13.8075	13.7667	13.3987	4.24793	4.42895	1.24147	1.43152	1.1229	1.9072	none	none	none
ENSMUSG00000007415	Gatad1	801	46.1829	50.021	48.8114	45.5371	50.9292	63.5853	73.0096	54.8518	68.7533	67.5954	60.8735	69.501	24.4197	25.1633	25.3589	5.62464	5.76422	6.05611	6.06587	4.69936	13.1068	13.0063	13.5223	4.56925	4.23317	2.96567	2.25677	2.27637	2.27712	none	none	none
ENSMUSG00000007440	Pcdha11	2841	7.17631	7.94092	4.91502	5.26723	8.14061	9.09362	8.60808	4.17312	3.16482	0.873494	1.08309	0.397203	0.102761	0.266048	0.0916636	2.94062	3.08755	2.65886	0.835598	0.206006	NA	NA	NA	4.64501	3.22239	0.714207	0.125808	0.058533	0.00679102	none	none	none
ENSMUSG00000007457	2310003L06Rik	1485	0	0	0	0	0	0	0	0	0	0	0	0.12665	0	0	0	0	0	0	0.0596553	0	NA	NA	NA	NA	NA	NA	NA	NA	NA	none	none	none
ENSMUSG00000007458	M6pr	837	74.8328	62.1011	68.3998	94.4201	82.8942	89.0709	128.306	115.817	147.706	84.0945	83.9894	78.1962	249.738	266.095	304.597	6.11779	6.48856	7.04012	6.37666	8.10054	12.1483	12.0065	12.0538	5.04002	5.35238	3.48265	5.6476	5.27118	5.03425	none	none	none
ENSMUSG00000007476	Lrrc8a	2433	0	0	0	0	0	0	0	0	0	0.278175	0.194572	0.0773019	0.119993	0.103554	0	0	0	0	0.242876	0.103687	NA	NA	NA	3.9855	5.24184	1.05058	0.974589	1.15548	1.26415	none	none	none
ENSMUSG00000007480	Mc5r	1119	0.375665	0.161288	0.311965	0	0	0	0	0	0	0.806433	0.211526	1.17652	0	0	0	0.359491	0	0	0.792017	0	NA	NA	NA	0.137504	0.163499	0	0	0	0	none	none	none
ENSMUSG00000007564	Ppp2r1a	1770	515.962	535.733	445.532	459.441	462.041	423.702	374.853	365.643	256.212	160.596	155.391	204.227	111.994	92.3807	90.6307	8.966	8.81184	8.3804	7.4463	6.63423	17.0714	17.0788	17.1062	7.89057	7.85033	4.12366	3.43629	2.91605	2.07606	none	none	none
ENSMUSG00000007570	Fance	1581	0.797665	1.25572	0.662408	1.18313	1.21903	1.40065	4.03524	1.32334	0	0.856166	0.898282	2.49816	1.47726	2.86847	3.78847	0.929991	1.18117	1.47829	1.27354	1.89196	10.648	11.0455	10.8018	2.45943	2.46989	1.84398	2.67381	2.75993	2.22776	none	none	none
ENSMUSG00000007589	Tinf2	1260	4.00352	5.01337	3.32466	4.08249	4.58879	7.61575	16.8775	12.4536	8.91989	6.62475	5.07209	7.01551	12.0484	8.19829	9.92062	2.35441	2.6846	3.7814	2.85548	3.46673	9.91595	10.2117	10.828	2.70929	2.72247	2.4647	3.00423	3.15249	2.79124	none	none	none
ENSMUSG00000007591	Tssk4	1017	0	0	0	0	0	0	0	0	0	0	0	0	0	0	0	0	0	0	0	0	NA	NA	NA	0.163499	0.0379679	0.189663	0	0.602908	0.493499	none	none	none
ENSMUSG00000007594	Hapln4	1203	108.325	82.3642	73.4161	67.2487	61.6797	45.4052	294.326	251.888	143.408	8.43889	8.85402	7.34792	3.88286	5.86411	4.11298	6.4763	5.88536	7.85096	3.20377	2.49057	11.2281	10.8776	13.5174	5.72901	3.96778	3.32754	1.50996	0.545386	0.225462	none	none	Int_Pv
ENSMUSG00000007603	Dus3l	1914	18.4488	15.7473	16.0501	15.3922	14.7685	13.4979	24.9989	15.85	5.57842	6.71848	7.54365	5.60099	7.93157	6.45006	7.21111	4.14964	3.95911	4.04227	2.92999	3.0352	12.174	12.4875	12.3846	3.55336	3.47595	3.2707	2.38445	3.02399	3.14717	none	none	none
ENSMUSG00000007610	Gtpbp3	1482	6.2403	7.18515	6.12437	5.99527	6.71907	3.4865	5.02226	3.05878	2.27511	1.37004	1.43743	1.01525	4.53083	3.06009	2.63579	2.91008	2.67814	2.15447	1.18539	2.14042	11.256	11.4163	11.3984	2.48543	1.79632	1.67266	1.49016	2.3427	2.00666	none	none	none
ENSMUSG00000007613	Tgfbr1	1512	5.83846	4.41654	3.00143	3.40208	3.18666	7.32284	11.9549	8.07178	7.43324	11.6381	10.4886	7.09015	1254.08	1407.37	1301.91	2.43798	2.49498	3.34388	3.42478	10.3686	7.96364	7.3937	8.0522	2.38405	2.04731	1.159	4.04706	5.58282	5.44884	Cx3cr1	none	Micro_1
ENSMUSG00000007617	Homer1	1113	252.675	242.101	266.6	165.541	159.02	118.713	48.7219	48.5612	54.5291	26.3504	24.4566	20.7846	12.3282	14.9403	8.65714	7.99318	7.21682	5.68941	4.63598	3.69769	13.6045	13.0417	11.1198	4.75916	3.04264	1.50686	0.350563	0.316917	0.229889	none	none	ExcL6
ENSMUSG00000007646	Rad51c	1155	4.91341	4.21904	1.81345	2.83413	4.72784	6.39084	7.36474	5.4343	6.32501	1.75792	1.8444	1.13985	1.51659	0.436272	0	2.21681	2.49849	2.88258	1.36777	0.723299	8.46845	8.65334	8.9964	1.29866	0.83727	0.108845	0.045762	0.0266723	0	none	none	none
ENSMUSG00000007653	Gabrb2	1539	394.147	407.167	466.359	379.817	380.49	432.621	855.326	774.664	910.663	54.0911	52.5994	28.7185	22.1945	28.4853	21.9975	8.72642	8.63895	9.72772	5.52783	4.65683	13.1502	12.4851	14.2997	5.7126	4.01673	0.651709	0.0210844	0.0722305	0.0218544	none	none	none
ENSMUSG00000007655	Cav1	537	3.13124	4.0331	3.25036	0.870821	0.598166	0	1.98005	1.2987	2.09293	9.24244	13.2233	10.8572	5.98021	3.28423	4.84946	2.16078	0.574985	1.48055	3.59785	2.51213	8.52514	7.87507	7.20961	2.20163	2.255	0.124337	0.020518	0.0478272	0.0177273	none	EC	none
ENSMUSG00000007656	Arpp19	438	815.305	816.698	1087.91	226.342	203.876	227.51	131.09	198.234	189.884	209.633	180.495	163.17	183.964	201.328	205.717	9.82598	7.78295	7.44352	7.53475	7.62938	16.8011	14.9395	13.8837	6.02104	4.8077	3.19121	3.55271	2.0373	2.54271	none	none	none
ENSMUSG00000007659	Bcl2l1	702	65.271	59.9033	60.1706	70.611	57.654	52.5742	142.377	91.3973	102.464	30.5299	35.0663	33.4892	74.0254	54.9116	79.7571	5.97227	5.93734	6.82119	5.08867	6.14087	13.1396	13.283	12.837	5.68538	5.30208	2.78751	2.58188	2.19	1.47817	none	none	none
ENSMUSG00000007670	Khsrp	2247	54.6274	55.1805	48.9377	61.8097	54.1791	50.9177	42.5882	36.3133	36.5132	28.6141	24.8601	30.5508	43.2652	34.9833	37.6659	5.75262	5.82363	5.30274	4.85839	5.30882	12.8215	12.8459	12.2012	4.35896	4.46728	1.51517	2.12275	1.40755	1.59632	none	none	none
ENSMUSG00000007682	Dio2	801	2.62403	3.3798	1.74327	0	0.401017	0	3.98234	2.61199	0.701564	203.068	207.147	177.275	5.46709	2.20179	4.87671	1.84091	0.181004	1.77903	7.62081	2.37347	7.73972	7.13947	9.8573	3.62994	6.14337	1.63884	0.828686	0.219269	0.0842085	GFAP	AS	none
ENSMUSG00000007721	Ccdc124	654	74.8823	64.5758	70.4583	93.6692	70.2351	60.9475	92.6716	65.5813	82.4885	53.8128	53.2026	64.7049	53.5675	46.6141	75.2579	6.14918	6.24699	6.34424	5.86394	5.89433	13.1328	13.203	12.9281	5.99232	5.86278	5.39017	4.54961	4.25867	3.19036	none	none	none
ENSMUSG00000007739	Cct4	1620	165.683	185.606	168.08	127.877	177.461	185.902	183.121	190.063	182.808	105.837	84.7435	87.6524	143.448	106.689	113.008	7.44396	7.36411	7.54172	6.55066	6.93131	14.2319	14.4014	14.6137	5.61235	5.90223	1.99095	1.01026	2.59098	2.646	none	none	none
ENSMUSG00000007777	0610009B22Rik	423	28.3228	41.3869	42.914	48.6425	59.9905	55.8405	85.465	98.0978	106.279	55.9999	50.3611	53.3547	42.7907	55.3927	56.639	5.26833	5.80283	6.60902	5.76125	5.7172	11.5341	11.8449	12.2893	4.31034	4.34009	2.82975	2.69024	3.56281	3.667	none	none	none
ENSMUSG00000007783	Cpt1c	2397	39.8974	42.0144	34.9526	63.2092	56.551	49.8869	23.0667	28.5129	22.9751	15.7176	15.5033	15.3787	1.33975	3.3635	2.93335	5.3203	5.84672	4.69218	4.0473	1.826	13.2268	13.2903	12.8945	4.63575	4.01257	4.25258	2.75429	1.24491	0.674931	none	none	none
ENSMUSG00000007805	Twist2	483	1.74066	1.49467	2.16825	3.87272	0.665041	1.52824	0	0.721948	0	0	0	0.38939	0	0	0	1.48604	1.5955	0.311095	0.176063	0	8.07854	7.90654	4.22819	0.485427	0.20581	0.738291	0.247657	0	0	none	none	none
ENSMUSG00000007812	Zfp655	1626	37.4868	43.0669	46.1588	42.5642	42.6706	49.0279	50.3523	48.8953	50.8038	18.8693	14.4115	10.4101	19.9297	18.7489	14.7345	5.43421	5.51583	5.67291	3.96011	4.23299	13.1438	12.952	13.5069	3.24489	2.20789	0.740351	0.100037	1.274	1.1478	none	none	none
ENSMUSG00000007815	Rhoa	582	135.067	129.004	99.5683	95.6153	72.8529	67.2191	224.715	79.6859	70.4855	216.297	217.176	329.617	637.057	727.271	659.99	6.93325	6.31402	6.97685	7.99641	9.40039	14.8515	14.8343	14.5391	4.77189	5.8195	3.93104	5.86209	5.38323	5.21881	none	none	none
ENSMUSG00000007817	Zmiz1	3219	44.3353	41.2096	34.1606	30.7977	27.3417	29.81	35.3437	21.4485	25.3132	15.4184	14.5592	19.7482	74.5502	60.1887	57.1152	5.35409	4.92203	4.82622	4.13548	6.02129	13.9817	13.6548	11.7946	4.71809	4.34625	0.637331	0.723392	1.3528	1.24933	none	none	none
ENSMUSG00000007827	Ankrd26	5046	6.1231	6.61693	7.26404	3.79962	4.45601	2.77937	6.32155	7.04865	8.57518	4.6497	3.28355	3.54086	3.58709	2.39665	2.11595	2.93885	2.22599	3.05574	2.27044	1.88748	9.15478	8.10046	9.2183	2.04264	1.56884	0.104306	0.084488	0.0406859	0.229871	none	none	none
ENSMUSG00000007833	Aldh16a1	2409	1.74499	1.64823	1.4491	0.194118	1.20006	1.83846	7.50346	3.32923	0.933089	1.40473	0.884299	1.87373	10.6646	7.4256	9.83723	1.38632	1.05488	2.29922	1.25555	3.36585	7.87583	7.79993	9.06203	1.72247	2.22239	1.42789	2.73241	2.78942	2.06482	none	none	none
ENSMUSG00000007836	Hnrnpa0	918	126.843	140.374	104.575	103.409	82.2282	57.8935	101.927	93.0628	43.4626	55.294	74.0002	79.4916	83.3214	96.6073	87.3728	6.96499	6.36066	6.33063	6.1415	6.49346	14.6353	14.7114	14.5459	5.56803	5.69321	5.09883	5.44663	5.64054	5.97716	none	none	none
ENSMUSG00000007837	Prrg2	597	3.16861	3.02314	4.09317	5.48311	2.15219	0	7.12418	5.25679	2.82388	6.802	4.36126	7.56082	11.7364	9.70651	6.54312	2.14676	1.82583	2.60129	2.85626	3.36858	8.29227	8.13174	8.17011	2.05658	2.59455	2.09979	2.30753	2.89789	2.61282	none	none	none
ENSMUSG00000007850	Hnrnph1	1419	151.528	153.008	143.916	193.446	202.146	262.173	149.115	204.945	200.386	81.7183	77.0643	71.7046	125.706	120.558	111.397	7.23347	7.78303	7.53772	6.28224	6.90954	14.3719	14.9134	14.4742	6.02414	6.01257	2.13649	1.53566	2.14528	4.10839	none	none	none
ENSMUSG00000007867	Ift43	621	13.8769	15.4034	14.0535	7.53029	9.31058	14.2636	39.3809	33.6909	42.531	34.1487	32.7793	32.7088	5.64141	5.27426	5.8709	3.94903	3.50693	5.30503	5.09644	2.72149	9.90835	9.79998	11.0541	3.13093	4.08236	1.17035	1.24814	0.620297	0.531297	none	none	none
ENSMUSG00000007872	Id3	360	3.50308	2.00535	3.87877	0	0.892264	0	2.95357	0.968613	3.12196	292.653	328.746	304.055	1.6219	5.59883	4.34027	2.04581	0.375647	1.74332	8.27372	2.27908	5.82128	6.77717	9.26286	4.21568	6.67817	5.83222	4.7565	2.25213	1.06441	GFAP	none	none
ENSMUSG00000007877	Tcap	504	9.17473	6.44576	6.23373	0	0	2.92913	8.43877	4.1512	6.68991	1.34286	0.939275	1.1195	0	0	1.0334	3.05046	0.982859	2.89271	1.09348	0.427033	10.2647	3.01752	12.6645	2.28688	1.23879	3.76526	2.45106	1.89143	1.28007	none	none	none
ENSMUSG00000007880	Arid1a	6864	27.896	26.4516	24.717	25.4799	24.6152	22.583	8.365	13.4116	10.7249	11.6678	11.4142	10.3025	23.7756	22.1335	20.1079	4.77373	4.65684	3.56484	3.60029	4.52392	13.3991	12.894	12.6949	3.854	3.55008	1.20825	1.1523	2.16077	2.3438	none	none	none
ENSMUSG00000007888	Crlf1	1278	1.15125	1.55344	1.09261	16.8318	12.5671	10.9739	1.66398	0.545697	0	1.58873	1.85209	1.91313	0.228437	0.197142	0.203769	1.18	3.85376	0.796232	1.4775	0.274748	7.89026	11.2336	6.93073	0.505891	0.49228	0.959916	0.344483	0	0.035499	CamKIIaHC	none	none
ENSMUSG00000007891	Ctsd	1233	66.3113	60.7459	51.5281	60.682	49.4978	31.1301	131.078	136.596	161.795	133.018	144.36	203.939	3942.29	4432.48	3643.5	5.91954	5.58806	7.17149	7.33485	11.9683	14.2601	13.4834	15.3896	7.60644	8.41478	6.01999	10.1749	10.52	9.68317	Cx3cr1	none	Micro_1
ENSMUSG00000007892	Rplp1	345	28.6338	21.9716	24.2845	43.3745	40.9665	29.9536	80.1316	58.6221	47.2366	34.0034	34.304	56.6952	50.7727	85.443	80.7668	4.6984	5.28903	5.97721	5.41507	6.19628	13.7783	14.2913	14.157	8.21354	7.25367	10.9627	12.306	11.1471	10.6381	none	none	none
ENSMUSG00000007907	Cabs1	1176	0	0	0	0	0	0	0	0	0	0	0	0	0	0	0	0	0	0	0	0	NA	NA	NA	0	0	0	0	0	0	none	none	none
ENSMUSG00000007908	Hmgcll1	1032	11.609	14.3406	10.1479	12.6877	12.4502	17.8813	10.3031	18.5839	20.1475	6.12092	7.56881	6.92526	2.54601	0.97654	2.01873	3.70404	3.9392	4.11643	2.97667	1.50949	9.80394	9.84309	10.3105	2.53605	1.82917	0.0817105	0.0180426	0.00733768	0.00322778	none	none	none
ENSMUSG00000007944	Ttc9b	720	117.937	101.521	95.5146	44.8146	30.7831	25.6299	35.4428	18.888	27.3171	5.63999	11.8349	4.17945	3.24381	6.99854	5.06365	6.72779	5.11863	4.81844	3.03881	2.60928	14.9452	13.9582	12.4771	6.6879	5.07096	7.3785	5.62615	3.35175	0.8848	none	none	ExcL6
ENSMUSG00000007946	Phox2a	843	0	0	0	0	0	0	0	0	0	0	0	0	0	0	0	0	0	0	0	0	NA	NA	NA	0.189034	0.539366	0	0.0659159	0	0	none	none	none
ENSMUSG00000007950	Abhd8	1320	76.7492	70.415	70.3467	63.0593	54.9959	41.9399	95.8567	53.8901	35.7606	19.6545	26.0008	26.644	7.0774	12.5974	7.29955	6.19974	5.76372	5.97352	4.6496	3.32069	15.2774	15.3963	15.6082	6.98368	6.0425	8.047	6.35162	4.13221	3.22347	none	none	none
ENSMUSG00000007987	Ift22	558	103.586	113.205	110.107	87.157	90.3777	87.3071	55.2603	52.4926	63.4463	80.4558	76.354	67.4106	26.1598	27.9942	32.6687	6.78091	6.48028	5.85963	6.24299	4.90404	12.636	12.4031	11.9413	5.30816	5.26404	3.65663	3.42009	1.8416	1.07212	none	none	none
ENSMUSG00000007989	Fzd3	2001	42.7512	48.9762	43.4399	41.3647	33.3897	39.8397	4.25101	14.4638	11.2334	33.9358	27.5615	25.8475	2.48027	3.77732	4.03443	5.52531	5.29271	3.45717	4.91241	2.14753	11.6841	10.8767	9.83569	3.40054	2.93357	0.816086	0.324925	0.0374596	0.0255568	none	none	none
ENSMUSG00000008028	1700008O03Rik	591	0.355642	0.916148	0.590675	0.791254	0.543511	0	1.79913	1.18004	0	0.763451	0.801006	0.318233	0.493981	0	0	0.696726	0.530991	0.994981	0.702714	0.219909	NA	NA	NA	1.70487	1.35238	1.43497	0.685621	0.104369	0.526094	none	none	none
ENSMUSG00000008035	Mid1ip1	549	29.8623	29.5871	21.6194	17.8875	9.94655	12.1007	58.103	59.7047	39.9201	465.582	516.078	550.866	193.565	187.698	185.944	4.80853	3.83911	5.74351	8.99955	7.57038	11.8155	11.7578	13.2144	5.8953	8.17323	6.18144	6.83213	6.44223	5.40561	none	none	none
ENSMUSG00000008036	Ap2s1	429	774.596	861.598	917.884	578.816	696.34	631.464	483.311	633.188	517.416	426.483	426.497	349.408	400.826	293.058	287.733	9.73532	9.31411	9.0918	8.65032	8.35846	15.3595	15.1556	15.2343	7.30049	6.90215	8.35461	7.92178	6.67552	6.01692	none	none	none
ENSMUSG00000008090	Fgfrl1	1590	0.660958	0.454041	0.658658	0.882323	0.202022	1.39272	0	1.31585	1.06029	68.2474	80.0901	80.6714	3.30501	2.69378	2.78432	0.670132	0.868441	0.841608	6.27307	1.97369	4.63692	4.9697	6.16802	2.93734	5.16591	1.83535	1.52626	0.951719	0.85102	GFAP	none	none
ENSMUSG00000008129	4930432K21Rik	1803	4.08012	4.00402	3.48508	1.81554	1.95971	1.63759	1.17946	0.1934	1.24671	0.375374	0.525119	0.625875	0.485762	0.698689	1.01104	2.27989	1.48763	0.905497	0.593391	0.792299	8.84208	9.04731	7.9211	0.956057	0.713696	0.275109	0.221983	0.0993873	0.0944198	none	none	none
ENSMUSG00000008136	Fhl2	840	145.628	112.801	131.324	103.547	97.8941	70.2992	5.06326	4.56632	4.68294	6.71428	6.481	5.82138	4.51816	4.49906	4.65029	7.03251	6.51696	2.52878	2.87556	2.474	13.0192	12.8538	10.2602	4.07039	2.63072	0.696025	0.329535	0.104251	0.0291547	none	none	none
ENSMUSG00000008140	Emc10	807	164.085	149.171	135.396	193.542	171.155	97.8701	121.217	129.196	95.3997	90.8549	108.816	113.964	81.3967	94.2851	70.3479	7.23411	7.27789	6.86135	6.72171	6.37521	13.4432	13.5322	13.2852	6.7211	6.68435	6.25561	6.23057	5.60189	4.14999	none	none	none
ENSMUSG00000008153	Clstn3	2871	448.555	379.256	361.37	339.77	306.111	276.385	1101.43	1046.83	916.036	61.5272	59.2774	35.8333	22.1677	29.2227	24.672	8.63442	8.26876	9.99779	5.7337	4.71996	16.134	14.9345	16.829	7.27296	6.00435	2.91751	1.82784	0.498979	0.0851423	none	none	none
ENSMUSG00000008167	Fbxw9	1377	4.88446	3.27671	2.28163	1.35841	1.39963	3.75236	1.54435	0.759696	0	0.983005	1.03136	2.4585	1.06007	1.46375	1.51295	2.1638	1.66454	0.822131	1.3167	1.22995	NA	NA	NA	2.37295	2.17206	1.96259	1.68073	1.44607	1.73284	none	none	none
ENSMUSG00000008193	Spib	853	0	0	0	0	0	0	0	0	0	0	0.277488	0	0	0	0	0	0	0	0.127628	0	NA	NA	NA	0	0	0.494309	0.1027	0.118461	0.211723	none	none	none
ENSMUSG00000008200	Fnbp4	3234	9.35887	8.09208	9.28313	9.97729	8.1446	7.30382	6.90445	8.84151	9.90455	7.32466	7.90455	5.58294	6.40938	6.31037	7.48878	3.30908	3.24416	3.25553	2.98866	2.95162	9.39218	9.53375	9.59882	2.74846	2.255	0.732921	0.32434	0.848648	1.9257	none	none	none
ENSMUSG00000008206	Cers4	1182	47.4783	43.3644	44.0053	45.8927	35.6	28.7263	26.9869	28.0259	28.0501	27.4842	28.636	25.6177	7.65671	8.09983	8.15178	5.52197	5.23801	4.84236	4.81997	3.16502	10.8554	10.0794	9.9342	3.22959	3.0761	1.01063	0.544563	0.290405	0.233707	none	none	none
ENSMUSG00000008226	Scrn3	1257	30.2652	38.7668	38.3248	37.2022	50.3416	48.1525	49.0617	46.0496	41.1294	23.6907	21.4666	19.8998	27.6382	27.6601	24.032	5.20107	5.53082	5.53647	4.50371	4.77839	11.5977	11.9765	12.4684	3.65306	3.27798	0.969381	0.580741	0.780886	0.479526	none	none	none
ENSMUSG00000008301	Phax	1158	60.4417	55.3289	64.2107	66.2275	71.0113	73.9417	56.0107	53.2988	67.939	38.574	44.1508	33.9445	39.077	34.1587	38.6801	5.93059	6.15772	5.90888	5.31795	5.25947	12.8435	13.0398	12.5347	4.46205	4.80529	2.25913	3.34101	2.58531	1.9195	none	none	none
ENSMUSG00000008305	Tle1	2343	15.5194	17.5628	14.0053	36.1251	30.7094	26.7785	8.62245	6.54837	4.07734	16.5613	15.6586	20.2283	4.11187	6.02179	5.00159	4.06142	5.00918	2.89065	4.20811	2.59576	12.0887	13.3691	11.7151	2.87971	3.50843	0.26718	0.253423	0.100116	0.118689	none	none	none
ENSMUSG00000008307	1700109H08Rik	633	0	0	0	0	0	0	0	0	0	0	0	0	0	0	0	0	0	0	0	0	NA	NA	NA	1.04264	0.736966	0	0	0	1.0361	none	none	none
ENSMUSG00000008318	Relt	1311	8.33684	8.81068	11.1836	3.56698	3.43021	1.68911	47.0408	48.9404	42.8644	9.80868	6.86079	6.0253	4.23106	4.03577	3.37687	3.38456	1.96178	5.56322	3.09844	2.28725	9.18226	8.72502	12.8771	2.84398	2.37666	1.46666	0.979342	1.03676	0.794961	PV	none	none
ENSMUSG00000008333	Snrpb2	678	57.6613	65.7505	77.2321	60.0058	86.2258	106.693	43.9115	63.7742	48.9015	46.9167	42.2425	52.1507	133.915	119.656	109.851	6.08494	6.41461	5.73324	5.58806	6.9324	11.8026	11.7515	11.5302	3.83996	4.03914	1.83332	1.72714	2.41528	2.76793	none	none	none
ENSMUSG00000008348	Ubc	2205	97.3236	96.9115	90.874	84.1948	100.953	89.0457	123.447	120.662	126.408	111.521	127.312	109.604	154.908	107.635	147.392	6.58551	6.52979	6.96006	6.87216	7.10481	13.7553	13.6142	14.1942	5.53169	6.44228	7.18112	8.28286	9.11535	8.07808	none	none	none
ENSMUSG00000008373	Prpf31	1500	27.1839	21.7781	26.7635	26.4991	32.3356	27.5573	24.1011	28.5935	17.6079	18.048	16.2532	20.3121	26.6641	18.4761	19.2708	4.7138	4.89711	4.61083	4.26337	4.48995	12.4653	12.6611	12.7371	3.20789	3.84398	1.22303	2.33349	2.1438	1.59107	none	none	none
ENSMUSG00000008384	Sertad1	711	14.4853	14.7228	12.7656	1.31542	4.96957	6.22905	19.4412	2.94262	4.74222	8.88437	8.6556	4.7614	8.21218	5.31535	6.59282	3.90605	2.37054	3.32798	3.07618	2.94613	11.8197	10.4807	9.07362	3.7761	3.51181	3.31872	3.00098	3.41832	2.61267	none	none	none
ENSMUSG00000008393	Carhsp1	447	0.470212	1.21128	1.56192	0	0	0	0	4.68055	1.25717	15.1409	22.7695	34.9223	9.79674	6.20005	6.99104	1.05737	0	1.57494	4.65979	3.1148	8.31555	7.8602	9.70406	3.98003	5.39392	2.46004	1.74811	1.06821	0.748913	none	none	none
ENSMUSG00000008398	Elk3	1230	0.854409	1.32059	1.70287	0.380188	0.26115	1.20023	0	0.283496	0	2.93463	4.42605	2.2936	43.6728	43.4251	50.6012	1.197	0.690512	0.13027	2.07659	5.55151	6.95039	5.19555	5.55625	1.26303	1.1592	0.336696	1.7731	1.82584	1.90801	Cx3cr1	none	none
ENSMUSG00000008429	Herpud2	1215	55.5303	62.8342	60.3364	56.1927	53.4036	71.0803	80.5121	77.489	73.077	69.0725	65.8467	69.1932	58.8691	56.8178	58.2989	5.92046	5.93606	6.28588	6.10931	5.88253	13.038	12.8315	12.9805	4.21878	4.40826	2.92312	1.94689	3.16116	3.96349	none	none	none
ENSMUSG00000008435	Rdh13	1005	11.2935	8.08125	6.94704	10.702	9.26889	11.7515	26.4499	22.5528	20.6888	8.08118	6.83007	8.79557	8.71471	5.51527	4.92329	3.28894	3.53283	4.59875	3.15417	2.88449	10.5508	10.7162	11.6779	3.0635	2.7977	2.13153	1.92208	1.36353	1.77569	none	none	none
ENSMUSG00000008438	Adam21	2190	0	0	0	0	0	0	0	0	0	0	0	0	0	0	0	0	0	0	0	0	NA	NA	NA	0.214125	0.0565835	0.0888683	0	0	0	none	none	none
ENSMUSG00000008450	Nutf2	384	1.09471	1.88001	0	0	0	0	13.8449	3.6323	0	0	0	1.95912	0.760268	0.656113	0	0.99391	0	2.77098	0.725121	0.557902	12.9663	13.0522	12.9274	2.9855	2.71516	1.15944	1.54737	0.926529	0.948489	none	none	none
ENSMUSG00000008461	Fut1	1134	0	0.159155	0	0	0.283258	0	0	0	0	0	0	0	0	0	0	0.074576	0.130166	0	0	0	NA	NA	NA	0.0285692	0.00958605	0.132029	0	0	0	none	none	none
ENSMUSG00000008475	Arpc5	456	101.405	112.801	125.55	375.335	342.348	372.308	30.3129	38.9994	48.0617	66.7894	69.0367	57.7425	458.401	380.684	406.044	6.83607	8.5091	5.32642	6.03393	8.70059	14.5829	15.7744	12.3932	4.82782	4.01495	2.79077	3.1955	3.74759	3.97987	none	none	none
ENSMUSG00000008482	Rnf151	720	0	0	0	0	0	0	0	0	0	0	0	0	0	0	0	0	0	0	0	0	NA	NA	NA	0.0285692	0	0	0	0	0.166466	none	none	none
ENSMUSG00000008489	Elavl2	1170	114.434	118.47	112.783	64.7489	87.3046	70.6597	126.322	143.057	160.421	21.403	18.2075	8.03741	11.7276	11.413	6.00961	6.86082	6.23338	7.17259	4.07747	3.42179	12.3164	11.7107	14.0743	4.36457	1.69599	0.4107	0.02307	0.0139601	0.00954825	none	N	Int_Sst
ENSMUSG00000008496	Pou2f2	1752	0.239937	0.206029	0.398503	0	0	0.421314	0	0	0	0.128767	0.270202	0.107349	31.9937	34.2257	29.8765	0.357822	0.189588	0	0.224995	5.04579	NA	NA	NA	0.956057	0.363638	1.04333	3.0994	4.20772	4.27018	Cx3cr1	none	none
ENSMUSG00000008540	Mgst1	690	0.609231	1.83097	1.01185	0	0	0	1.54099	3.03218	6.51539	247.179	245.959	247.769	5.92348	6.93768	9.05796	1.1048	0	2.23149	7.95402	3.05422	NA	NA	NA	3.40871	5.95761	0.777878	0.383843	0.233048	0.0362269	GFAP	none	none
ENSMUSG00000008575	Nfib	1713	54.356	56.8943	57.4682	103.736	101.634	102.987	40.3465	36.4375	49.2078	116.422	115.931	115.722	5.79455	6.4715	6.08094	5.83894	6.69746	5.42617	6.87067	2.831	11.0975	12.0363	8.78231	3.35614	4.12212	1.31919	0.355331	0.114634	0.029418	none	none	Int_Npy
ENSMUSG00000008590	Htr3b	1314	0	0	0	0	0	0	0	0	0	0	0	0	0	0	0	0	0	0	0	0	NA	NA	NA	0.0285692	0	0	0	0	0	none	none	none
ENSMUSG00000008601	Rab25	642	0	0	0	0	0	0	0	0	0	0	0	0	0.45474	0	0	0	0	0	0	0.203614	NA	NA	NA	0.0565835	0	0.172161	0.24078	0.353678	0.385856	none	none	none
ENSMUSG00000008604	Ubqln4	1791	53.7491	51.4941	56.9146	39.9484	35.5112	28.4376	54.6187	44.196	36.7105	22.0435	22.8636	22.8925	17.6046	17.1622	18.9024	5.78274	5.15512	5.52904	4.56071	4.23953	12.8457	13.0591	12.7492	5.48929	4.87053	3.02969	2.33538	1.21405	1.41596	none	none	none
ENSMUSG00000008658	Rbfox1	1254	315.612	306.127	281.721	387.082	331.973	313.74	159.408	174.628	164.463	31.6631	24.7268	16.4978	19.556	18.886	21.1822	8.23914	8.43156	7.38514	4.66083	4.38369	14.6955	14.8986	14.3344	6.09466	4.76765	0.518548	0.139356	0.0337415	0.0306154	none	none	none
ENSMUSG00000008668	Rps18	459	11.9059	9.04372	6.08434	22.4137	9.09759	16.0815	30.1148	19.7521	13.4673	7.86404	7.21953	10.2438	25.4416	23.054	22.1269	3.32356	4.0759	4.46672	3.23916	4.61711	12.4733	12.5949	12.328	4.38957	4.1811	5.81399	7.44728	5.86434	6.11877	none	none	none
ENSMUSG00000008682	Rpl10	645	0.977603	0.279816	0.541223	0.725009	0.498008	1.14441	1.6485	1.08124	0	0	0.366973	0.58318	0.452625	1.95308	0.807492	0.677664	0.839267	0.933509	0.396946	1.05037	10.4956	10.6189	10.0417	0.799087	0.526069	5.01355	5.71651	6.04921	5.26038	none	none	none
ENSMUSG00000008683	Rps15a	393	34.7634	49.5979	35.5307	69.0143	68.6566	71.3725	102.811	105.586	120.112	52.2381	50.5918	48.8135	57.9429	56.4157	51.023	5.35628	6.14325	6.78794	5.68784	5.81063	14.0831	14.3564	14.1841	3.89142	2.6477	2.51007	1.89655	2.07256	2.4449	none	none	none
ENSMUSG00000008690	Ncaph2	1827	31.2919	28.0551	30.9537	25.5956	22.1528	21.817	43.6488	31.4919	31.3734	13.9533	20.7288	18.8384	18.6958	17.6515	20.2403	4.95885	4.59625	5.19001	4.23574	4.31198	13.67	13.9195	13.7742	4.95977	4.68557	3.40774	3.07039	2.96058	2.47918	none	none	none
ENSMUSG00000008730	Hipk1	3633	27.4229	26.2798	25.7517	30.7635	26.79	32.7115	35.1209	34.0734	32.6375	35.1471	34.4654	35.7204	35.5185	36.0618	36.7006	4.78056	4.9583	5.12697	5.17436	5.2131	12.1687	12.5383	12.1672	4.41684	4.35003	1.44533	1.2527	0.991578	1.3166	none	none	none
ENSMUSG00000008734	Gprc5b	1236	15.8149	13.5799	16.6636	37.8342	32.4853	38.8181	301.092	317.667	320.077	564.547	662.982	645.482	12.5186	16.5111	13.2736	4.03147	5.22417	8.29437	9.28849	3.91658	9.18426	10.3353	13.4371	5.86938	7.50605	2.80253	1.55884	0.525674	0.147134	none	none	ExcL5_2
ENSMUSG00000008763	Man1a2	1926	37.2134	42.1685	49.6627	45.6462	38.359	36.7921	58.5193	56.3063	60.9803	15.4617	13.027	11.7181	70.7878	64.0988	73.1491	5.45992	5.36687	5.89729	3.84822	6.13638	12.2664	11.6654	12.422	4.05658	2.9782	0.690074	1.00966	1.2406	1.5229	none	none	none
ENSMUSG00000008789	Ceacam5	2844	0	0	0	0	0	0	0	0	0	0	0	0	0	0	0	0	0	0	0	0	NA	NA	NA	0	0	0	0	0	0	none	none	none
ENSMUSG00000008813	Tppp2	513	0	0	0	0	0	0	0	0	0	0	0.922797	0	0	0	0	0	0	0	0.38692	0	NA	NA	NA	0	0.119909	0	0	0	0	none	none	none
ENSMUSG00000008822	Acyp1	474	117.508	149.259	164.234	115.428	124.691	140.154	262.456	308.975	361.594	141.833	91.8825	87.2924	36.3389	37.2074	41.2051	7.17659	6.99726	8.28544	6.75492	5.29464	11.639	11.8241	12.896	4.2765	3.86724	3.27702	2.47193	1.85782	1.74745	none	none	none
ENSMUSG00000008843	Cldn13	636	0	0	0	0	0	0	0	0	0	0	0	0	0	0	0	0	0	0	0	0	NA	NA	NA	0	0	0	0	1.87274	0.278502	none	none	none
ENSMUSG00000008845	Cd163	3480	0.422785	0	0.100313	0	0.0923032	0	0	0	0	0.0648275	0.136033	0.270223	84.0594	79.5661	67.349	0.231882	0.0437193	0	0.210424	6.28525	NA	NA	NA	0.286881	0.20581	0.155834	2.44487	0.0287694	0	Cx3cr1	none	Macrophage
ENSMUSG00000008855	Hdac5	3366	14.0498	11.0455	10.7859	18.7553	13.1692	12.2804	13.8991	17.5076	12.8551	9.5843	9.98545	9.38701	13.6171	12.8743	13.075	3.69604	3.9759	3.97764	3.41309	3.82668	NA	NA	NA	5.06867	4.6893	3.31012	3.21476	2.48199	2.23673	none	none	none
ENSMUSG00000008859	Rala	621	76.8308	84.5733	93.8774	115.213	121.038	118.863	54.7908	96.5805	66.0589	108.622	115.109	96.9149	146.677	112.382	117.837	6.42784	6.89931	6.19922	6.75331	6.9845	12.3335	12.4977	11.93	4.59216	4.6565	1.31751	1.05981	1.30724	1.26823	none	none	none
ENSMUSG00000008874	Clec3a	591	0	0	0	0	0	0	0	0	0	0	0	0	0	0	0.440637	0	0	0	0	0.197713	NA	NA	NA	0	0	0	0	0	0	none	none	none
ENSMUSG00000008892	Vdac3	855	66.1283	73.2479	92.2738	70.5549	77.7678	63.886	70.8856	73.0028	69.0117	41.162	35.4354	32.1158	41.3159	32.1196	23.4527	6.2894	6.16463	6.16926	5.21869	5.05728	13.0586	13.2533	13.6595	4.18587	4.12543	4.41675	2.23367	3.62009	3.43742	none	none	none
ENSMUSG00000008932	Slc1a7	1710	0	0	0	0	0	0	0	0	0	0	0.13842	0	0	0	0	0	0	0	0.0650757	0	NA	NA	NA	0.0285692	0	0	0	0	0	none	none	none
ENSMUSG00000008958	Vps72	1107	17.6578	15.8145	16.0827	17.7421	20.3117	22.0042	16.3287	21.1047	20.8131	16.7111	14.9673	14.9509	33.7567	26.1734	35.0515	4.13079	4.39365	4.35159	4.04816	5.02948	11.2396	11.7926	11.6077	4.15543	4.40916	5.0846	4.85575	5.62386	5.14088	none	none	none
ENSMUSG00000008976	Gabpa	1365	14.0123	14.9409	13.5544	26.0366	25.1795	30.8235	14.8003	19.9258	21.4077	52.7226	49.7671	54.1492	77.6375	55.7422	59.3329	3.92307	4.8251	4.30095	5.73371	6.02763	10.0392	10.7976	9.67413	2.46467	3.08859	0.32667	0.935086	0.989988	1.54401	none	none	none
ENSMUSG00000008999	Bmp7	1293	0.975335	1.39583	1.07994	0	0.248426	0.570875	0	0.539367	2.17306	8.72388	8.05467	13.2366	0.903149	0.38971	0.604214	1.10458	0.348346	0.929141	3.46009	0.706957	6.22025	4.88898	5.8245	1.5656	3.08179	0.358753	0.226374	0.0241817	0.00541923	GFAP	none	none
ENSMUSG00000009013	Dynll1	270	1621.54	1639.71	1586.42	1856.67	1626.3	2285.51	799.432	459.768	464.131	625.83	648.726	546.115	311.406	323.799	306.712	10.659	10.9098	9.16853	9.24767	8.29908	16.2156	16.6117	13.9295	5.57773	5.10182	6.81427	5.69361	4.77713	4.68701	none	none	none
ENSMUSG00000009030	Pdcl	906	28.999	30.2794	35.8336	35.6143	25.1725	33.4038	73.937	102.378	96.7601	57.2714	62.44	49.4061	55.7463	43.1036	41.3907	5.0314	5.01778	6.52395	5.84229	5.57733	12.3437	12.1463	13.4053	3.36737	3.53937	1.15439	0.971016	1.62757	1.62532	none	none	none
ENSMUSG00000009035	Tmem184b	1245	44.7381	36.5311	35.0491	19.9072	14.7062	21.3439	74.3018	81.2235	63.6428	14.4964	18.2514	24.4725	25.3252	24.8912	23.0087	5.31371	4.29664	6.21055	4.32721	4.66723	11.8375	10.5721	11.9516	4.89627	4.14568	1.57781	1.45652	1.95336	1.61816	none	none	none
ENSMUSG00000009047	Gm5965	651	0	0	0	0	0	0	0	0	0	0	0	0	0	0	0	0	0	0	0	0	NA	NA	NA	NA	NA	NA	NA	NA	NA	none	none	none
ENSMUSG00000009070	Rsph14	1125	0.186831	0.160428	0.310301	0	0	0	0	0	0.499514	2.20586	1.26239	0.501535	0.259505	0	0	0.285919	0	0.222192	1.21615	0.11969	NA	NA	NA	0.0565835	0.47854	0.0413656	0	0	0	none	none	none
ENSMUSG00000009073	Nf2	1791	8.44963	8.86787	10.1355	18.5381	18.2936	20.1948	13.6547	9.9295	11.2955	17.3829	15.4626	16.8018	13.6925	11.676	12.7954	3.34355	4.32257	3.65839	4.13333	3.77834	12.8611	13.5061	12.2783	4.32769	4.51096	1.09953	1.15902	0.475272	0.640509	none	none	none
ENSMUSG00000009075	Cabp7	648	9.73077	7.24153	8.08076	118.351	114.507	113.911	121.424	140.449	59.8376	4.17777	6.57493	2.9024	3.1537	1.16642	1.60751	3.22512	6.8653	6.75805	2.47293	1.57332	9.46328	13.3136	7.5786	3.64847	1.50589	0	0	0	0	none	none	none
ENSMUSG00000009076	Zmat5	513	29.0899	27.4416	31.9828	32.8162	42.5782	40.2884	51.817	54.3783	51.485	46.6151	53.5222	53.893	52.3562	31.9232	55.8397	4.93096	5.30601	5.74309	5.70994	5.57611	11.5716	12.0599	12.5734	4.7939	5.17632	1.58189	1.38865	1.75686	1.10797	none	none	none
ENSMUSG00000009079	Ewsr1	1986	48.4716	39.1679	26.542	50.1538	47.7132	33.8222	12.314	16.3289	12.4501	8.51962	9.29627	7.86015	22.3441	27.0215	25.1762	5.28764	5.48853	3.87751	3.25681	4.69194	14.7886	14.8767	14.3762	4.84298	5.20372	2.09099	1.97381	2.04682	2.23886	none	none	none
ENSMUSG00000009090	Ap1b1	2832	138.565	126.375	120.554	92.4694	112.403	110.513	146.427	105.275	78.7766	56.9575	51.2343	58.5079	117.726	89.7651	101.15	7.01678	6.72966	6.79649	5.82188	6.69878	14.7835	14.715	15.2721	5.58676	5.18243	2.80711	3.23838	2.89715	2.06153	none	none	none
ENSMUSG00000009092	Derl3	687	0.611891	0.525418	1.01627	1.36137	0.935124	0	0	1.01514	0	0.328384	0.689075	0.273763	0.849906	0.733471	0.379063	0.780613	0.820075	0.420488	0.516426	0.726087	7.22652	7.25568	7.43647	0.910733	0.941106	0.803615	1.11812	1.2927	0	none	none	none
ENSMUSG00000009093	Gstt4	723	0	0	0	0	0	0	0	0	0	0	0	0	0	0	0	0	0	0	0	0	NA	NA	NA	0	0.00958605	0	0	0	0	none	none	none
ENSMUSG00000009097	Tbx1	1467	0	0	0	0	0	0	5.07361	1.90157	0.383063	0.153783	0	0	0	0.171743	0	0	0	1.78775	0.0721209	0.0803135	NA	NA	NA	0.31034	0.0379679	0.90121	0.239216	0	0.188474	PV	none	none
ENSMUSG00000009108	Gnat2	1065	0	0	0	0	0	0	0	0	0	0.211831	0	0.176597	0	0	0	0	0	0	0.175653	0	NA	NA	NA	0	0.0658021	0	0.0398439	0	0	none	none	none
ENSMUSG00000009112	Bcl2l13	1305	25.1255	21.2982	18.4576	26.517	24.6142	20.3625	13.0364	16.5666	7.32046	22.4735	17.9564	19.312	14.3175	14.4797	12.7714	4.49998	4.63408	3.7342	4.38639	3.89299	11.1513	11.0371	10.9227	3.39232	3.26303	0.612639	0.584697	0.465795	0.420216	none	none	none
ENSMUSG00000009114	2610028H24Rik	813	0	0	0	0	0	0	0	0	1.38242	0.27749	0	0.231335	0	0	0	0	0	0.546764	0.226026	0	NA	NA	NA	0.400538	0.457682	0	0	0	0	none	none	none
ENSMUSG00000009115	Spatc1l	1029	0	0	0	0	0	0	0	0	0	0	0	0	0	0	0	0	0	0	0	0	NA	NA	NA	0	0	0	0.0413744	0	0	none	none	none
ENSMUSG00000009145	Dqx1	2157	0	0	0	0	0	0	0	0	0	0	0	0	0	0	0	0	0	0	0	0	NA	NA	NA	0.0565835	0	0.0689649	0	0.0913736	0.318575	none	none	none
ENSMUSG00000009185	Ccl8	294	0	0	0	0	0	0	0	0	0	0	0	0	39.7201	17.1393	31.8877	0	0	0	0	4.93463	NA	NA	NA	0.163499	0.0379679	0.452407	3.1235	0	0	Cx3cr1	none	none
ENSMUSG00000009207	Lnpk	1278	123.019	136.138	149.414	113.066	126.425	155.945	123.967	217.188	270.423	43.6018	35.5602	26.931	31.2959	28.1913	24.0447	7.10003	7.05324	7.67849	5.18445	4.8502	11.0263	9.76518	10.6797	NA	NA	NA	NA	NA	NA	none	none	none
ENSMUSG00000009210	Prr29	726	0	0	0	0	0	0	0	0.960608	0	0.93223	2.60824	2.33151	0	0	0	0	0	0.400759	1.56429	0	NA	NA	NA	0.189034	0.910733	0	0	0	0	none	none	none
ENSMUSG00000009214	Mymk	666	0.315593	0	0	0	0	0	0	0	0	0	0.355401	0.564791	27.6162	34.4252	30.4992	0.144304	0	0	0.385962	4.99308	NA	NA	NA	NA	NA	NA	NA	NA	NA	Cx3cr1	none	none
ENSMUSG00000009216	Fam163b	504	71.3126	66.6062	53.333	93.7118	47.7998	38.0788	6.32907	8.3024	6.68991	10.7428	12.2106	8.20964	6.37177	13.9971	5.68369	6.01682	5.9275	3.01919	3.5094	3.27563	15.4292	15.0471	13.3629	5.41143	3.56071	1.96397	1.05801	0.227439	0.0185983	none	none	ExcL5_3
ENSMUSG00000009246	Trpm5	3477	0	0	0	0	0.0923828	0	0	0	0	0	0.0680752	0	0	0	0	0	0.0437564	0	0.0323713	0	NA	NA	NA	0	0	0	0	0	0	none	none	none
ENSMUSG00000009248	Ascl2	792	0.530769	0.22788	0	0	0	0	0	0.440279	0	0.284848	0	0.237469	1.10584	0.636231	0.328808	0.325252	0	0.197563	0.231562	0.757275	NA	NA	NA	0	0	0.407441	1.31786	1.76562	0.359239	none	none	none
ENSMUSG00000009281	Rarres2	492	2.56323	0	0.70953	0	0	0	17.2892	4.96119	18.2749	149.483	165.977	173.932	1.78014	3.07253	3.70511	1.06414	0	3.85882	7.3587	1.94583	2.87005	3.6375	5.3497	3.62293	5.72174	2.00956	1.10783	0	0.127259	GFAP	none	none
ENSMUSG00000009291	Pttg1ip	525	7.60668	5.50038	5.98438	4.45363	7.34206	9.84189	8.10122	3.32096	6.42232	282.322	291.701	278.352	188.512	217.395	229.662	2.88045	3.03783	2.79663	8.15545	7.73374	10.4544	10.3509	10.0167	4.56316	6.4435	1.49509	3.68817	3.21798	3.39915	none	none	none
ENSMUSG00000009292	Trpm2	4521	4.18417	4.03198	4.40125	3.82711	3.33933	2.77558	9.40752	8.25281	6.71211	0.798406	0.575906	0.956809	12.0755	7.3004	6.04815	2.38012	2.10903	3.18969	0.829477	3.24408	10.5366	10.1428	12.1694	2.52105	1.36737	0.501207	0.788201	0.843096	1.28376	none	none	none
ENSMUSG00000009293	Ube2g2	498	29.122	24.2816	25.2353	37.5607	37.4106	20.751	53.3777	30.8089	16.9263	9.51324	10.4565	12.8405	28.7253	23.7782	19.3482	4.76622	5.04034	5.11704	3.57734	4.641	13.2634	14.0866	12.8873	4.38819	3.82714	2.24292	2.78859	2.0352	1.84362	none	none	none
ENSMUSG00000009350	Mpo	2157	0	0.167345	0	0	0	0	0	0	0	0	0	0.0871931	0	0	0	0.0783114	0	0	0.0413332	0	NA	NA	NA	0.0285692	0.0191088	0.118561	0	0	0	none	none	none
ENSMUSG00000009356	Lpo	2133	0.0985394	0.169228	0	0	0	0	0	0	0.263457	6.45175	6.99106	7.14211	0	0	0.122089	0.123343	0	0.121438	2.97483	0.0575493	NA	NA	NA	0.641546	1.40054	0.316871	0.061773	0	0.0688534	GFAP	none	none
ENSMUSG00000009376	Met	4140	3.75692	3.44397	3.28852	3.61454	3.56906	3.20931	0	0.589591	0.814424	1.90724	1.48651	1.59001	0.423106	0.547712	0.314512	2.16879	2.15843	0.553857	1.41211	0.514444	10.9528	9.21485	7.4233	1.09761	0.59773	0.0664546	0.00301777	0.00808911	0.00546346	none	none	none
ENSMUSG00000009378	Slc16a12	1461	0	0.247065	0	0	0	0	1.45556	0	0	0.308829	0	0	0	0.344897	0.35649	0.114174	0	0.570643	0.141358	0.303104	NA	NA	NA	0.400538	0.172061	0.0114473	0	0	0	none	none	none
ENSMUSG00000009394	Syn2	1761	457.847	479.746	457.126	372.299	489.392	348.742	203.479	161.381	126.687	86.8578	71.2377	58.2062	22.5464	32.6201	23.8086	8.8639	8.65992	7.365	6.19181	4.77215	15.8038	15.8447	14.9419	6.92742	5.78171	1.9757	0.923128	0.162867	0.0540506	none	none	none
ENSMUSG00000009406	Elk1	1290	14.1752	14.2706	7.57713	19.2127	10.7072	6.86644	10.7153	11.353	11.7618	4.89674	3.30275	4.08226	2.26312	1.56246	2.01873	3.70129	3.72924	3.61785	2.34878	1.55979	12.3661	13.2322	11.443	3.9222	2.64923	2.51457	2.04028	0.33124	0.235318	none	none	none
ENSMUSG00000009418	Nav1	6297	16.8562	16.1937	12.4734	13.4415	13.0078	12.5427	9.45592	11.0751	6.51462	3.26021	2.74399	2.00112	5.14621	4.80128	3.84607	4.01564	3.80708	3.32412	1.87517	2.48487	NA	NA	NA	2.91456	1.88232	0.961917	0.462455	0.34448	0.526991	none	none	none
ENSMUSG00000009470	Tnpo1	2697	5.92289	7.42804	8.15447	6.76218	5.83594	6.84225	14.5871	13.3171	13.3352	25.2618	22.6429	31.6597	45.0309	33.9106	40.0715	3.03007	2.90306	3.8823	4.78249	5.34593	10.2149	10.1489	11.1526	2.65992	2.88882	0.053093	0.0787392	0.171459	0.41709	none	none	none
ENSMUSG00000009471	Myod1	957	0.439257	0.188591	1.09432	0	0	0	0	0	0	0	0	0	0	0	0	0.654488	0	0	0	0	NA	NA	NA	0.137504	0.0931094	0.171273	0	0	0	none	none	none
ENSMUSG00000009487	Otog	8736	0.0240596	0	0	0	0	0	0	0	0	0.0258241	0	0	0	0	0	0.0115241	0	0	0.0123656	0	NA	NA	NA	0	0	0	0	0	0	none	none	none
ENSMUSG00000009535	Rnmt	1398	79.8341	93.4681	106.624	83.9595	90.5284	102.432	70.7335	94.7827	126.62	36.1476	34.7088	26.7718	19.8387	29.0154	25.8926	6.55932	6.54391	6.62028	5.06793	4.69575	12.5979	12.7272	12.9458	3.74416	3.07382	1.72155	0.86135	0.965703	1.37579	none	none	none
ENSMUSG00000009545	Kcnq1	2007	0.209452	0.359703	0	0	0	0	0	0.173742	0	0.112406	0	0	0	0	0	0.25062	0	0.0812225	0.053068	0	NA	NA	NA	0.111031	0.0285692	0.00789309	0.00104046	0	0.00122717	none	EC	none
ENSMUSG00000009549	Srp14	333	186.2	188.611	200.228	265.412	252.728	283.73	143.687	206.288	232.881	233.729	221.06	239.471	311.23	259.513	322.197	7.59006	8.06765	7.60944	7.86059	8.2223	13.8659	14.426	14.1121	6.30086	6.25651	4.29984	4.74782	3.29903	3.94935	none	none	none
ENSMUSG00000009551	6330409D20Rik	489	0.859651	0.369082	0	0.956301	0	0	0	2.85236	2.29838	0	0	0	0	0	0	0.495263	0.39919	1.44197	0	0	6.0898	5.35927	8.38464	1.41143	0.422233	0.851302	0.289461	0	0	none	none	none
ENSMUSG00000009555	Cdk9	1119	33.622	29.9996	29.9487	25.492	29.8538	28.3647	31.3569	24.9295	18.5811	20.1608	17.3451	17.1436	52.1792	45.256	47.0099	5.00854	4.85317	4.69799	4.26427	5.61907	NA	NA	NA	3.53854	3.55908	1.98817	2.72487	2.50309	2.84975	none	none	none
ENSMUSG00000009563	Tor2a	966	9.35604	8.78118	6.86614	4.35681	5.65285	4.58473	3.30213	5.05363	1.16346	9.3416	9.55611	10.5135	11.7865	12.5191	9.97454	3.22257	2.55208	2.06111	3.43346	3.63537	11.6105	11.5587	11.2183	3.73769	3.83929	2.95752	4.32795	4.68096	3.42579	none	none	none
ENSMUSG00000009566	Fpgs	1764	1.31068	1.02314	0.395793	0	1.45676	1.67379	0.602769	1.18606	0.955702	2.55782	2.68364	2.34561	6.62002	5.14178	6.64327	0.933473	1.03105	0.937226	1.81927	2.83492	NA	NA	NA	1.50589	2.20163	0.347993	0.55528	1.12106	0.809525	none	none	none
ENSMUSG00000009569	Mrtfb	3276	160.975	156.186	147.265	116.48	122.172	133.839	14.9301	20.1173	19.3836	19.4886	18.5687	10.1616	8.5551	10.8439	10.0955	7.28363	6.96767	4.2588	4.09364	3.43716	14.0955	13.8183	11.2154	NA	NA	NA	NA	NA	NA	none	none	none
ENSMUSG00000009575	Cbx5	576	212.374	196.775	246.665	310.13	318.427	356.256	256.591	271.817	355.123	271.033	235.054	224.646	76.0268	85.2947	70.5294	7.77876	8.36313	8.20707	7.93415	6.29064	14.3306	14.4732	14.0026	4.62293	4.36083	1.41756	0.412911	0.254588	0.426829	none	none	none
ENSMUSG00000009580	Odam	822	0	0	0	0	0	0	0	0	0	0	0	0	0	0	0	0	0	0	0	0	NA	NA	NA	0	0	0	0	0	0	none	none	none
ENSMUSG00000009585	Apobec3	1323	0.317739	0	0	0	0	0	0	0	0	7.50294	5.72511	9.66677	50.7535	35.6116	38.1865	0.145238	0	0	3.10963	5.40997	NA	NA	NA	0.748461	1.83727	2.21748	5.54021	6.31481	6.23935	Cx3cr1	none	none
ENSMUSG00000009588	St6galnac1	1581	0	0	0	0	0	0	0	0	0	0	0	0	0	0	0	0	0	0	0	0	NA	NA	NA	0	0	0	0	0	0	none	none	none
ENSMUSG00000009596	Taf7l	1416	0	0	0	0	0	0	0	0	0	0	0	0	0	0	0	0	0	0	0	0	NA	NA	NA	0.0285692	0.0379679	0	0	0	0	none	none	none
ENSMUSG00000009614	Sardh	2760	0.456923	0.523134	0.252963	0.169432	0.465529	0.534885	0	0	0	12.0974	12.1779	16.0137	1.26932	2.00828	0.849183	0.496725	0.475032	0	3.85096	1.24829	7.33945	6.67628	5.91835	1.91073	4.22754	0.381904	0.391402	0.284324	0.210982	GFAP	none	none
ENSMUSG00000009621	Vav2	2607	0.886855	0.692295	0.535618	0.538125	0.49285	0.283138	1.63143	2.54136	3.88	3.02876	1.45269	2.59713	21.389	16.4292	19.7785	0.769706	0.524102	1.88138	1.74826	4.3362	8.93961	8.84526	9.98639	1.70487	1.79909	0	0	0	0.00237845	Cx3cr1	none	none
ENSMUSG00000009628	Tex15	8358	0.100591	0.0863753	0.125301	0	0.038432	0.264947	0	0.0417206	0.201706	0.13496	0.169919	0.0450049	0.0349297	0.120578	0	0.142857	0.13898	0.112556	0.159149	0.0729096	NA	NA	NA	0.111031	0.0285692	0.11282	0	0	0	none	none	none
ENSMUSG00000009630	Ppp2cb	930	237.757	235.984	240.984	202.64	203.436	224.617	264.106	172.476	164.96	135.36	128.529	107.789	124.939	113.783	111.727	7.90233	7.72268	7.65474	6.96455	6.88039	14.2222	14.3561	13.8268	6.04527	5.488	2.90779	2.27413	2.23798	2.14798	none	none	none
ENSMUSG00000009633	G0s2	312	4.04201	2.31386	3.35662	1.49882	1.02954	4.73168	10.2239	10.0587	18.0113	18.0769	12.897	21.701	3.74286	3.23009	1.66933	2.08321	1.774	3.78289	4.21399	1.95634	5.80404	7.9316	10.1305	2.33342	3.38773	3.7875	2.56357	2.10865	1.85114	none	none	none
ENSMUSG00000009640	Dmap1	1407	29.2794	29.3747	23.8184	31.2419	28.5372	22.0341	35.5184	31.2269	19.5705	14.9117	16.6546	18.1793	21.1643	13.6091	19.0639	4.83243	4.82125	4.89588	4.13602	4.2438	12.0346	12.2845	12.2461	3.72683	4.31808	2.60388	2.38859	2.56924	2.11436	none	none	none
ENSMUSG00000009646	Pla2g12b	588	0	0	0	0	0	0	1.80831	0.593028	1.9114	0	0	0	0	0	0	0	0	1.28545	0	0	NA	NA	NA	0.0285692	0	0.0360854	0	0	0	none	none	none
ENSMUSG00000009647	Mcu	1053	41.518	41.9923	42.4344	46.6299	38.1309	46.9663	29.2832	27.4854	32.5538	20.139	19.3314	18.3967	9.98095	11.724	10.6343	5.42565	5.48893	4.94365	4.34263	3.55824	12.81	13.0477	12.197	3.49057	3.27997	0.335635	0.202675	0.0865143	0.0700159	none	none	none
ENSMUSG00000009654	Oit3	1641	0	0	0.212729	0	0	0	0	0	0	0	0	0	0	0	0	0.098837	0	0	0	0	NA	NA	NA	0	0.0473057	0	0	0	0	none	none	none
ENSMUSG00000009670	Tex11	2844	0	0.0634603	0	0	0	0	0	0	0	0.713923	0.998723	0.661306	0.410609	0.531535	0	0.0301997	0	0	0.841021	0.394018	NA	NA	NA	0.0285692	0.302563	0	0	0.00403818	0.00542904	none	none	none
ENSMUSG00000009681	Bcr	3813	29.1602	27.4532	26.2755	39.981	36.3926	42.2017	13.3852	11.8886	8.1058	14.3773	15.7674	18.1022	5.58925	7.6648	5.60035	4.83944	5.34074	3.60009	4.09443	2.86489	12.3247	13.2326	12.0852	4.33485	4.5373	1.25469	0.606671	0.140339	0.155751	none	none	none
ENSMUSG00000009687	Fxyd5	558	1.5067	3.88132	4.37925	1.6761	4.02958	1.32284	0	0	1.00708	2.4258	3.39351	0.337053	117.719	71.7915	70.4711	2.08942	1.74107	0.41759	1.60981	6.45385	NA	NA	NA	2.0635	0.776806	1.69841	2.76241	1.93125	1.06347	Cx3cr1	none	none
ENSMUSG00000009731	Kcnd1	1956	6.23247	8.02754	6.24648	2.62983	2.29908	4.52848	6.52322	5.1699	4.02216	3.11411	5.80852	4.90381	13.8807	13.0096	14.7782	2.97002	2.05397	2.64118	2.4877	3.89622	8.20437	7.43047	9.06865	1.9486	1.81558	0.827074	1.78585	2.75068	2.63456	none	none	none
ENSMUSG00000009733	Tfcp2	1518	15.0923	10.9383	11.7283	18.1754	18.4096	14.1015	16.8108	10.337	9.99521	9.36283	9.97934	9.78785	4.6157	8.13269	6.86209	3.76408	4.16152	3.74211	3.42089	2.91396	10.9487	11.0742	11.1368	2.70929	2.60565	0.212283	0.109079	0.107838	0.178678	none	none	none
ENSMUSG00000009734	Pou6f2	1913	1.64808	1.22648	1.64234	0.244449	0.335823	0	0.55582	0.364559	0	0.11793	0.247462	0.196629	0	0.131703	0	1.32517	0.255107	0.386031	0.247733	0.0619848	NA	NA	NA	0.641546	0.0285692	0.0129412	0.0037504	0.00342108	0	none	none	none
ENSMUSG00000009739	Pou6f1	1731	10.8067	10.9477	10.0834	8.10452	9.09274	4.26425	9.82816	7.25201	4.22033	4.82218	3.82873	5.43257	3.71042	3.05655	3.30974	3.53762	3.02748	3.01795	2.50957	2.12397	10.841	10.9465	11.1231	4.61589	3.51937	1.91786	1.52397	0.34769	0.779138	none	none	none
ENSMUSG00000009741	Ubp1	1623	25.9008	28.023	29.037	23.3383	23.9476	21.3756	21.6195	15.4692	15.9272	10.5641	11.6672	9.38639	15.1098	11.0217	12.034	4.84064	4.57817	4.2228	3.52847	3.7784	11.2916	11.2516	11.2334	3.92979	3.24894	0.596498	0.565636	0.957658	1.55238	none	none	none
ENSMUSG00000009772	Nuak2	1920	0.656827	0.470003	0	0	0.334599	0	0.553794	0.181615	2.04879	0.1175	0.24656	0.097956	4.86571	6.03624	2.98394	0.460072	0.152551	0.947154	0.20665	2.49278	NA	NA	NA	0.464668	0.385891	0.168503	0.387997	1.22614	1.42137	Cx3cr1	none	none
ENSMUSG00000009828	Ick	1890	4.44835	3.9152	4.61758	2.22681	2.54933	3.90551	0	1.84498	3.86528	3.81968	3.7571	3.88092	9.26803	8.13163	6.20039	2.41334	1.96121	1.53775	2.2688	3.14839	9.54526	9.74949	9.36771	2.23266	1.90561	0.401528	0.384246	0.330701	0.601837	none	none	none
ENSMUSG00000009863	Sdhb	849	316.143	348.42	365.125	376.198	357.536	352.987	358.185	358.969	322.345	369.091	326.748	341.814	201.506	151.94	186.187	8.42723	8.50478	8.44087	8.43831	7.49887	14.3432	14.4115	14.8551	6.66107	7.30743	4.5293	4.81826	4.41372	4.16585	none	none	none
ENSMUSG00000009876	Cox4i2	519	0.40498	1.04324	0.672618	0	0	0	8.19487	7.39057	9.74485	13.0404	10.4895	13.7705	0	0.485448	0.501765	0.771419	0	3.23931	3.74776	0.410418	NA	NA	NA	1.68706	2.82239	0.0658047	0.0330998	0	0.0389623	none	none	none
ENSMUSG00000009894	Snap47	1242	531.892	563.386	505.926	446.17	497.34	490.312	453.737	367.792	262.426	106.624	93.0019	97.3692	44.4261	57.0026	42.9834	9.06268	8.9037	8.50111	6.64383	5.61875	16.754	16.6779	17.1855	7.70667	7.08052	3.64673	2.27222	1.20964	0.656385	none	none	none
ENSMUSG00000009900	Wnt3a	1059	0	0	0	0	0	0	0	0	0	0	0	0	0	0	0	0	0	0	0	0	NA	NA	NA	0	0	0	0	0	0	none	none	none
ENSMUSG00000009905	Kdsr	999	29.8761	35.9517	39.836	45.4056	44.6936	50.2439	124.529	100.177	126.566	100.267	85.2963	85.66	39.1595	36.3167	35.4521	5.17876	5.57837	6.88375	6.51424	5.24702	10.1955	9.74769	10.0405	2.926	3.15812	0.9747	1.01542	1.31276	1.15908	none	none	none
ENSMUSG00000009907	Vps4b	1335	44.3985	46.1004	47.5912	44.4862	39.2195	34.2807	26.2834	33.1723	36.2007	19.9406	13.8295	22.2591	104.093	83.7937	82.709	5.55551	5.33374	5.03938	4.2984	6.51094	12.5987	12.5342	12.3684	3.61353	3.36364	0.813631	0.917144	1.58291	2.06519	none	none	none
ENSMUSG00000009927	Rps25	378	11.1209	12.4141	11.0822	22.2681	9.34753	7.81103	11.2517	18.4498	16.3531	14.3238	13.776	16.4193	63.3315	86.6486	55.1146	3.64836	3.82194	4.03135	3.98547	6.11613	13.1181	13.4193	13.3223	1.35614	0.956057	3.36296	5.28106	3.6836	4.32553	Cx3cr1	none	none
ENSMUSG00000009941	Nxf2	2076	0.101245	0	0	0	0	0	0	0	0	0.10867	0.228032	0	0	0	0	0.047885	0	0	0.153461	0	NA	NA	NA	0.0285692	0.0473057	0	0	0	0	none	none	none
ENSMUSG00000009995	Taz	792	32.3769	27.8014	24.2423	28.3413	18.6564	24.2319	14.7678	27.7376	18.4479	18.8	17.035	24.9342	54.9236	56.6245	58.5279	4.86494	4.62896	4.41399	4.40983	5.8503	9.71955	9.88556	10.312	3.18269	3.30256	3.08026	4.38817	5.17102	4.68558	none	none	none
ENSMUSG00000010021	Kif19a	2994	0.210606	0.180843	0.116596	0	0	0	0	0.232933	0.375386	2.18517	2.45077	2.70115	1.65766	1.51471	0.695835	0.225705	0	0.266364	1.7848	1.19497	NA	NA	NA	0.695994	1.93357	0.0169362	0	0.035056	0.0470354	none	OL	none
ENSMUSG00000010025	Aldh3a2	1599	32.4675	34.4257	33.1842	41.2358	37.3646	36.0069	24.6038	27.0412	26.358	35.1309	29.7537	37.0505	66.4585	53.2572	47.7186	5.10262	5.29287	4.75494	5.12839	5.82811	11.9921	12.2152	11.9935	4.17792	4.57491	1.69079	2.28674	2.31242	1.87706	none	none	none
ENSMUSG00000010044	Zmynd10	1323	0.953218	0.818509	0.263862	1.06039	0.728379	0	0.803692	0	0	1.87573	2.32582	1.84806	0	0	0.393675	0.747198	0.674692	0.342438	1.59289	0.177886	7.93145	8.84097	4.93208	0.782409	1.22239	0.57864	0.346519	0	0.350714	none	none	none
ENSMUSG00000010045	Tmem115	1053	21.9566	17.8253	23.2063	22.2047	22.2685	9.81385	24.2344	23.8428	17.0774	27.8518	36.6398	29.6491	23.8434	22.2518	18.7955	4.45917	4.25517	4.50578	5.01704	4.50018	11.7046	11.4793	11.4425	4.15381	4.73805	2.97435	3.79988	4.45772	3.18695	none	none	none
ENSMUSG00000010047	Hyal2	1422	3.10399	3.42686	2.70041	4.60396	2.93656	0.519087	5.23417	4.16871	1.97592	5.07679	6.65815	7.14211	5.74852	4.96099	5.86028	2.02754	1.88227	2.26091	2.86638	2.70559	8.97814	9.00551	9.96128	2.57046	2.76695	3.40263	3.77271	4.48853	3.35357	none	none	none
ENSMUSG00000010048	Ifrd2	1326	0.317021	0.544438	1.05306	1.05799	0	0	0.801874	1.05189	2.11898	0	0.714019	0.709183	0.880672	0.380011	0.981962	0.712087	0.435802	1.21676	0.560129	0.805332	9.06309	9.0956	9.21604	1.83188	1.78799	1.13488	0.853512	1.42563	1.39904	none	none	none
ENSMUSG00000010051	Hyal1	1389	0	0.129936	0.251324	0	0.231256	0	0.765504	0.251044	0	19.8151	23.8572	28.0285	0.630546	0.906938	0.749939	0.172598	0.107133	0.420994	4.63809	0.817602	NA	NA	NA	1.25096	2.69599	0.715012	0.532602	0	0.0944758	GFAP	none	none
ENSMUSG00000010054	Tusc2	333	63.1185	63.4123	59.754	63.1934	53.0535	73.1492	41.5096	67.0175	47.2513	20.3243	23.4565	25.9804	21.0409	25.7244	10.1664	5.97945	6.00297	5.72591	4.60013	4.32028	13.9305	13.9243	14.2518	5.71754	4.56234	6.25877	5.22408	4.30133	3.52613	none	none	none
ENSMUSG00000010057	Nprl2	1143	40.6394	39.6332	31.7631	41.3217	44.4024	45.8513	36.2801	30.2024	14.2578	13.4215	13.0463	15.9609	13.7926	14.3277	12.7588	5.26098	5.48731	4.80289	3.92057	3.8705	12.2519	12.5923	12.5653	4.01078	4.09536	3.3873	2.74816	2.46983	2.77108	none	none	none
ENSMUSG00000010064	Slc38a3	1518	6.50769	4.39908	5.51919	0.924172	1.48123	0.972519	2.10135	4.13479	4.07212	533.83	606.712	687.999	8.65443	6.47296	6.51898	2.69495	1.08812	2.14929	9.25388	3.03834	7.65581	6.18812	8.78502	4.87184	7.60269	3.48737	2.4647	0.488459	0.129399	GFAP	none	none
ENSMUSG00000010066	Cacna2d2	3474	8.3493	7.06547	8.64181	3.49983	4.71559	6.16181	337.594	317.183	317.534	27.7941	29.0932	27.6104	3.61357	4.71404	4.79754	3.17295	2.53416	8.34476	4.86621	2.42628	10.0643	10.0558	14.6468	4.16189	3.14731	0.480962	0.173042	0.0183425	0.00926797	PV	N	none
ENSMUSG00000010067	Rassf1	1035	10.56	12.3808	12.4795	8.58453	9.00023	3.5659	8.21862	7.07509	7.60129	13.5142	14.4077	14.1738	11.5649	13.1451	13.3353	3.67884	3.00903	3.10964	3.90995	3.77418	9.33437	9.225	9.07954	3.0072	3.3599	3.87288	3.87011	4.75304	3.97328	none	none	none
ENSMUSG00000010080	Epn3	1911	0	0.0944433	0	0	0	0	13.3537	5.47411	4.70499	0.236106	0.12386	0.196835	0.763848	0.131841	0.272544	0.0447174	0	3.14474	0.245618	0.474474	5.5936	7.37975	10.3869	1.91073	1.01436	1.19855	0.749908	0.225953	0.073757	PV	none	none
ENSMUSG00000010086	Rnf112	2040	122.608	115.809	107.465	146.479	137.776	114.701	50.0369	21.7083	28.3731	8.18352	7.19374	5.16286	5.29504	11.3623	6.12744	6.86163	7.06593	5.10319	2.97209	3.10349	14.2184	14.7454	12.5404	5.57652	4.52523	5.82371	4.36304	1.07029	0.921071	none	none	ExcL5_2
ENSMUSG00000010095	Slc3a2	1698	109.177	98.6376	83.2633	68.8503	79.8308	63.468	146.53	132.046	146.942	319.666	347.379	315.01	348.853	412.642	375.134	6.61509	6.16423	7.15825	8.3591	8.56939	12.9822	12.1686	12.9163	5.47249	7.04126	2.69593	4.22402	5.81463	4.42222	none	none	none
ENSMUSG00000010097	Nxf1	1857	26.4853	29.74	28.0098	30.9739	28.3679	21.4645	12.0242	16.3365	14.5254	15.5502	19.1193	16.2047	26.8833	20.2155	21.5962	4.86188	4.80403	3.93503	4.16656	4.57884	12.403	12.6994	12.2334	4.12267	3.80323	1.66668	2.04708	2.69296	3.80183	none	none	none
ENSMUSG00000010110	Stx5a	1329	41.9104	45.4938	40.4512	22.8713	27.3117	28.326	38.4031	35.4211	36.3641	28.8577	27.962	31.1336	34.9277	27.6782	26.845	5.44687	4.76393	5.23762	4.92209	4.94565	NA	NA	NA	4.25096	4.27401	3.83055	4.49853	4.79504	5.44811	none	none	none
ENSMUSG00000010122	Slc47a1	1704	0	0.105916	0.409729	0	0	0	1.24799	0.204637	0	0.132394	0	0	0	0.295713	0.152826	0.228827	0	0.569693	0.0623033	0.201023	NA	NA	NA	0.111031	0	0.151436	0.0388353	0	0	none	none	none
ENSMUSG00000010136	Pifo	741	1.1346	0.487129	0	0	0	0	1.43493	0.470581	1.51674	3.95789	4.79144	2.79194	0.393985	0	0	0.62347	0	1.09812	2.27712	0.178018	NA	NA	NA	0.400538	1.31034	0.124163	0	0	0	GFAP	none	none
ENSMUSG00000010142	Tnfrsf13b	750	0	0	0	0	0	0	0	0	0	0	0	0	33.4761	44.6787	41.3194	0	0	0	0	5.35137	NA	NA	NA	0.189034	0.0658021	0	0.77663	0.621609	1.21787	Cx3cr1	none	none
ENSMUSG00000010154	Spire2	2157	3.80028	1.84079	1.94208	2.16797	1.78701	2.39545	2.46473	5.17312	2.86578	0.313769	0.219469	0.261579	0.135347	1.28485	0.362192	1.81873	1.64007	2.17031	0.339068	0.672769	11.4348	11.6466	12.199	3.13422	1.94111	0.227526	0.130834	0	0	none	none	none
ENSMUSG00000010175	Prox1	2214	0.66454	1.05974	0.946041	31.2599	27.1306	29.339	12.9669	8.3474	6.09163	3.97398	2.45892	2.54845	7.51614	6.03126	4.23441	0.918467	4.91854	3.34132	1.99776	2.79229	5.04956	12.2435	8.098	2.45943	1.60723	0.0472629	0.0256706	0	0.0919736	none	none	Int_Vip
ENSMUSG00000010205	Raver1	2247	0	0	0	0	0	0	0	0	0	0	0	0	0	0	0	0	0	0	0	0	NA	NA	NA	3.37573	3.88622	0.399296	0.498281	0.467886	0.667896	none	none	none
ENSMUSG00000010277	2610507B11Rik	6705	13.1346	11.7629	13.797	19.04	17.486	19.926	14.9066	13.2615	9.72208	28.5995	30.1476	27.3768	10.1886	11.9116	10.7196	3.79682	4.30869	3.76872	4.89278	3.57772	13.4916	13.4872	14.3387	5.17552	5.50016	2.6504	2.75358	1.25242	1.72805	none	none	none
ENSMUSG00000010290	AI597479	699	25.5589	33.8241	30.9635	55.527	35.3842	62.3038	48.6768	49.3868	65.9229	64.872	49.1003	51.9293	40.5128	40.3692	31.2947	4.95956	5.70243	5.79863	5.81508	5.26274	10.2168	10.6572	10.6469	3.60407	3.59136	1.19064	0.924887	0.660117	0.797383	none	none	none
ENSMUSG00000010307	Tmem86a	726	8.97483	9.44667	7.21258	3.86472	4.86689	9.15052	5.85832	5.76365	6.96636	10.5653	10.759	16.8387	78.8165	114.869	125.545	3.2547	2.79923	2.84722	3.77831	6.74699	10.8604	10.0025	11.0309	3.06005	3.19849	3.4644	6.92399	8.16244	7.19545	Cx3cr1	none	none
ENSMUSG00000010311	Optc	1146	0.183407	0.78744	1.52308	0	0	0	0	0	0	3.14973	2.27196	2.29761	0	0	0.227239	0.872874	0	0	1.83718	0.105338	NA	NA	NA	0.526069	1.11991	0.316951	0	0	0	GFAP	none	none
ENSMUSG00000010342	Tex14	4353	0.09657	0.0414613	0.080195	0	0	0	0	0.240317	0.129096	0.0518262	0.271878	0.0432059	0.402402	0.231516	0.179474	0.101303	0	0.167535	0.166463	0.346112	NA	NA	NA	0.0565835	0.0191088	0.00284336	0	0.0118085	0.00657627	none	none	none
ENSMUSG00000010358	Ifi35	861	0.488234	0.209618	0.810892	0	0.746144	0	0	0	0	1.83414	2.7491	5.24252	48.1485	41.2597	35.69	0.587763	0.320444	0	2.09601	5.41614	6.59291	6.45463	5.24702	0.831877	1.04264	0.88693	3.55399	3.04619	3.27925	Cx3cr1	none	none
ENSMUSG00000010362	Rdm1	846	0.745336	0.42667	1.2379	1.10551	0.379687	2.61752	3.77051	2.88523	1.32849	12.8	15.6679	13.3387	6.21155	4.76496	2.46257	0.850642	1.24341	1.8724	3.90068	2.45409	5.87222	7.19492	7.56382	2.51602	4.02148	1.63686	2.65032	2.68925	2.18048	none	none	none
ENSMUSG00000010376	Nedd8	246	230.69	190.752	195.83	307.952	214.143	165.032	410.618	425.245	513.981	226.517	199.172	249.238	453.342	448.589	509.188	7.6918	7.84576	8.81682	7.82002	8.88073	14.3152	14.3292	14.6795	7.02126	6.80357	4.41775	5.38474	3.41253	3.49665	none	none	none
ENSMUSG00000010392	Gosr1	753	37.4034	33.3159	34.7698	55.8922	46.9238	49.0134	46.5981	50.0128	68.6582	52.4302	48.7226	38.4643	52.3404	48.1812	59.4842	5.17644	5.68957	5.80966	5.57104	5.76382	10.956	11.2523	11.091	3.80116	3.68557	0.489263	0.639936	0.407402	0.516024	none	none	none
ENSMUSG00000010406	Mrpl52	366	44.2192	46.8462	44.8284	88.16	56.1687	84.7048	87.1545	87.6515	89.0526	88.7605	75.0188	70.3998	151.555	162.458	249.743	5.53288	6.27323	6.47497	6.30487	7.56162	10.8786	11.5851	11.4892	5.36877	5.53439	7.39258	8.3243	8.33195	7.60402	none	none	none
ENSMUSG00000010435	Spaca7	549	0	0	0	0	0	0	0	0	0	0	0	0	0	0	0	0	0	0	0	0	NA	NA	NA	0	0	0	0	0	0	none	none	none
ENSMUSG00000010453	Kansl3	2712	18.6004	17.3028	14.9315	10.6907	14.0946	14.9697	32.1495	19.5437	14.0903	9.39999	9.94967	12.1361	10.0113	12.4487	11.2348	4.1655	3.83306	4.51903	3.52297	3.61254	NA	NA	NA	4.07553	3.58175	1.46507	1.15733	0.868333	1.45938	none	none	none
ENSMUSG00000010461	Eya4	1920	0.328413	0.752005	0.545452	0.243558	0	0	4.43035	4.54037	4.97562	1.5275	1.72592	2.05708	27.6737	25.0635	19.1243	0.624762	0.112615	2.49794	1.46997	4.64119	4.63901	4.22499	12.4959	0.782409	0.629162	0.00463681	0.00530634	0.0302208	0.0632406	Cx3cr1	none	none
ENSMUSG00000010476	Ebf3	1791	0	0	0	0	0	0	10.6863	16.3545	9.72671	0.629815	0.925115	0.73508	6.0312	10.9726	9.74198	0	0	3.72855	0.818308	3.30965	NA	NA	NA	1.1375	0.146221	0.0717235	0.185631	0.206718	0.46189	none	N	none
ENSMUSG00000010505	Myt1	3510	1.85633	1.69683	1.19347	2.26488	2.28786	1.68237	6.96739	9.13973	6.56412	0.449914	1.07896	0.964489	0.499048	1.36382	0.890312	1.36861	1.62217	3.09712	0.872728	0.939396	9.20715	9.92142	9.50977	2.18269	1.34861	0.0608129	0.0467915	0	0	none	none	none
ENSMUSG00000010517	Faf1	1950	30.6115	31.7462	29.7173	34.7726	31.6273	36.3393	39.2597	40.95	36.0226	16.7754	14.9301	17.0715	28.1463	19.7682	25.9081	4.98603	5.1394	5.31267	4.10928	4.6785	12.5966	12.8252	13.0003	3.09761	2.9684	0.22792	0.260947	0.174903	0.186927	none	none	none
ENSMUSG00000010529	Gm266	603	0	0	0	0	0	0	5.28997	0	0	12.3462	9.02826	12.476	0	0	0	0	0	1.4664	3.61865	0	NA	NA	NA	1.38957	3.31325	1.33668	0.226307	0	0	GFAP	none	none
ENSMUSG00000010538	Tsacc	375	3.92345	1.92513	3.72362	3.74105	2.56972	0	0	0.929869	0	7.21919	5.68074	6.01841	3.11406	2.68744	6.24999	2.0672	1.63394	0.389519	2.8691	2.32687	NA	NA	NA	1.04264	1.43652	1.6994	1.98458	1.29913	2.47906	none	none	none
ENSMUSG00000010554	Mettl16	1782	13.2103	13.1664	11.7538	16.7948	19.6478	25.6817	22.0772	36.005	30.9042	27.472	27.628	25.33	19.4956	15.8351	17.098	3.77717	4.44016	4.93839	4.79753	4.2076	10.9603	11.2276	11.3324	3.48285	3.92156	0.591282	0.488204	0.474547	0.505982	none	none	none
ENSMUSG00000010592	Dazl	897	1.64024	3.21929	3.11339	3.12797	2.50669	5.7603	0	0	0	1.00602	0.527753	0.629015	0	0.561756	0	1.87091	2.26253	0	0.783188	0.247626	7.70465	8.5924	5.87798	0.678072	0.163499	0.161544	0	0.16654	0.0273102	none	none	none
ENSMUSG00000010601	Apol7a	1257	0.501634	0.574324	0	0	0	0	0	0	0	0	0	0	0	0	0	0.442177	0	0	0	0	NA	NA	NA	0.111031	0.0379679	0	0	0	0	none	none	none
ENSMUSG00000010607	Pigyl	216	51.5731	36.7647	48.4846	32.4744	38.6648	61.5118	34.4583	67.8029	88.4555	66.8443	62.4618	73.1405	32.4381	30.327	13.2619	5.54249	5.49879	6.01284	6.09766	4.71931	11.2003	11.8199	12.0817	4.66221	4.66524	6.64739	6.38806	5.92491	4.94499	none	none	none
ENSMUSG00000010608	Rbm25	2517	50.2706	55.1411	61.0247	65.7693	66.2338	68.0369	23.6567	39.4834	44.8758	24.4691	22.6635	16.2894	47.9032	41.0403	35.3843	5.81964	6.08066	5.20966	4.46863	5.40744	13.2783	12.8614	12.5141	3.98732	3.34672	1.57514	1.88177	1.65439	3.24596	none	none	none
ENSMUSG00000010609	Psen2	1347	8.89423	8.84318	8.81145	7.63763	10.0156	4.93191	26.8387	20.4509	17.1047	7.20177	9.48898	11.0304	9.53637	9.35217	11.7932	3.30007	3.09227	4.48959	3.3562	3.48893	9.54356	8.91691	9.87321	3.18587	3.3084	1.55904	1.78336	2.03771	1.35927	none	none	none
ENSMUSG00000010651	Acaa1b	1275	0.329701	0.141554	0	0.366769	0	0	0	0	0.881495	0	0	0	0.228975	0	0	0.210495	0.166402	0.37165	0	0.106114	NA	NA	NA	0.189034	0.137504	1.01262	1.04949	0.751657	0.755479	none	none	none
ENSMUSG00000010660	Plcd1	2349	4.116	2.766	2.5264	1.19446	1.09396	0.628473	0.905308	1.03913	0.239231	12.1011	11.0842	21.2175	6.71133	5.04109	7.42779	2.04828	0.979878	0.78901	3.98194	2.88624	9.90022	8.75988	9.06218	1.926	3.62137	0.576061	0.864067	1.16844	1.62235	none	none	none
ENSMUSG00000010663	Fads1	1344	31.5902	29.0059	27.0128	25.7475	23.4219	28.5591	18.1961	20.4965	20.906	805.377	869.652	996.352	76.6784	61.8621	67.623	4.91662	4.75004	4.3831	9.80003	6.12352	NA	NA	NA	6.13832	8.81115	4.30652	3.84417	3.8509	3.34536	GFAP	none	none
ENSMUSG00000010721	Lmbr1	1473	27.6822	31.3667	26.3061	26.6674	22.6791	24.5546	33.2051	22.9626	30.5202	15.3157	14.3015	12.2575	2.37835	2.90774	2.82869	4.88028	4.67997	4.90188	3.90286	1.88945	11.4376	10.6084	11.4662	3.04614	2.38957	0.314902	0.127286	0.0385324	0.0704677	none	none	none
ENSMUSG00000010751	Tnfrsf22	597	0	0	0	0	0	0	8.90523	0.584088	0	3.77889	1.18943	2.52027	2.9341	3.7982	3.92587	0	0	2.05766	1.80579	2.18673	NA	NA	NA	0.356144	0.8101	0.0902999	0.179206	0.392284	0.376559	none	none	none
ENSMUSG00000010755	Cars	2496	26.0205	22.054	23.7761	14.8008	16.8586	20.7011	24.7077	18.4409	15.5348	7.32114	8.91408	7.30902	23.042	15.5448	15.2327	4.64098	4.20582	4.36185	3.14536	4.24335	NA	NA	NA	3.1177	3.16564	0.9326	1.22325	0.921925	1.26576	none	none	none
ENSMUSG00000010760	Phlda2	435	0	0	0	0	0	0	0	0	0	0	0.544132	0	0	0	0	0	0	0	0.24047	0	NA	NA	NA	0	0	0	0	0	0	none	none	none
ENSMUSG00000010796	Asz1	1428	0	0	0	0	0	0	0	0	0	0	0	0	0	0	0	0	0	0	0	0	NA	NA	NA	0	0	0	0	0	0	none	none	none
ENSMUSG00000010797	Wnt2	1083	4.0756	3.99958	4.51269	12.522	13.6435	3.40786	0	0	0	0.62493	0.218557	0.347323	0.539137	0	0	2.37739	3.44066	0	0.482267	0.238435	8.78705	10.4195	5.18826	1.43296	0.485427	0.079169	0.0564153	0	0	none	none	none
ENSMUSG00000010803	Gabra1	1368	1061.68	1106.5	1196.04	966.369	956.836	1214.59	2266.48	2562.49	2836.05	140.505	127.346	63.1043	48.4437	67.407	55.2052	10.1324	10.032	11.3197	6.79855	5.85844	14.6989	14.1942	16.4983	6.65821	4.60565	1.95278	0.373157	0.291191	0.0968704	none	none	Int_Pv
ENSMUSG00000010825	Grid2ip	3612	0.87286	0.999342	0.483235	0.258932	0.0889299	0	66.8233	59.758	34.383	0.7495	0.458716	0.676905	0.161652	0.48827	0.144195	0.836042	0.158278	5.77228	0.703432	0.338802	6.57583	6.63424	5.6636	2.43296	0.572081	0.373486	0.0283027	0	0	PV	none	none
ENSMUSG00000010830	Kdelr3	645	0	0	0	0.725009	0	0	0	0	0	4.54697	3.30275	4.08226	0	0	0	0	0.312282	0	2.31537	0	NA	NA	NA	0.464668	0.831877	0	0	0	0	GFAP	none	none
ENSMUSG00000010841	Cfap97d1	495	0	0	0	0	0	0	0	0	0	0	0	0	0	0	0	0	0	0	0	0	NA	NA	NA	NA	NA	NA	NA	NA	NA	none	none	none
ENSMUSG00000010911	Apip	726	17.6601	17.6504	15.3868	13.5265	11.946	15.2509	64.4415	69.1638	53.4087	32.0066	35.2112	38.0814	30.5615	23.2513	22.9568	4.16182	3.86537	5.985	5.17392	4.73281	10.419	10.4629	10.4777	3.46989	4.34955	0.827496	1.13046	1.12964	0.970253	none	none	none
ENSMUSG00000010914	Pdhx	1506	45.3586	53.8088	42.651	50.924	43.7245	47.543	94.6083	93.0795	75.7479	52.8796	51.2373	45.8325	19.5792	17.9006	15.3898	5.59314	5.59685	6.47268	5.67195	4.21903	12.7029	12.7902	13.5415	4.18269	4.43607	0.864641	0.752743	0.49435	0.723216	none	none	none
ENSMUSG00000010936	Vac14	2349	15.4798	15.2898	12.632	9.95383	10.9396	9.4271	27.1592	19.5949	17.4638	11.813	13.8048	10.1684	22.9925	21.3442	18.8466	3.95114	3.47338	4.48581	3.69251	4.46343	10.8347	10.8716	11.5733	3.24793	3.29278	0.433549	0.458056	0.758484	0.613882	none	none	none
ENSMUSG00000011008	Mcoln2	1701	0	0	0	0	0	0	0	0	0.330366	0	0.139152	0	0.17163	0.296234	0	0	0	0.150718	0.0654123	0.209085	NA	NA	NA	0	0	0	0.0129754	0	0	none	none	none
ENSMUSG00000011034	Slc5a1	1998	0	0	0	0	0.160768	0.36944	10.1113	20.7685	15.7504	0.112913	0	0.376527	0	0	0.391015	0	0.234791	4.04818	0.218033	0.176755	NA	NA	NA	0.941106	0.0473057	0.0409153	0	0	0	PV	none	none
ENSMUSG00000011096	Akt1s1	987	14.6938	12.0687	12.7327	14.6875	10.0888	7.47864	11.8502	12.012	15.3726	19.4285	20.6241	27.6301	13.6063	15.3159	14.2477	3.82426	3.55479	3.8154	4.55832	3.94392	NA	NA	NA	4.67807	5.08406	3.99727	3.75934	3.39082	2.62254	none	none	none
ENSMUSG00000011114	Tbrg1	1221	109.31	106.87	94.9202	77.747	82.6056	94.3081	52.2499	38.8397	46.9445	41.9419	39.9342	38.8166	35.6261	24.9678	30.0726	6.71012	6.42437	5.55494	5.36565	4.9645	13.3493	13.2909	11.7515	4.64847	4.95016	2.50484	2.14458	2.90196	3.02214	none	none	none
ENSMUSG00000011118	Panx3	1179	0	0	0	0	0	0	0	0	0	0	0	0	0	0	0	0	0	0	0	0	NA	NA	NA	0	0	0	0	0	0	none	none	none
ENSMUSG00000011148	Adssl1	1443	8.30251	7.37934	7.25757	0.324069	0.445204	1.5346	14.7371	19.0903	9.73584	2.18877	3.44466	2.21572	14.9714	9.42838	12.0914	3.11211	0.822083	3.95616	1.85455	3.7185	11.1627	8.28259	14.561	3.73985	3.62449	1.54975	1.58188	1.11276	0.75138	none	OL	none
ENSMUSG00000011154	Cfap161	912	0	0.395792	0	0	0	0	2.33176	2.29408	0.616176	3.71052	2.07629	5.15558	0	0.276258	0	0.178786	0	1.45804	2.21644	0.127087	NA	NA	NA	0.641546	1.74272	0.177577	0.0955462	0	0	none	none	none
ENSMUSG00000011158	Brf1	2031	20.4907	18.4836	17.7037	20.9524	20.7184	18.5353	14.6588	10.9881	11.6209	15.2177	16.8986	17.1314	24.1489	17.4912	22.4386	4.31416	4.39703	3.74659	4.12234	4.48282	11.0628	11.5055	10.5662	3.4489	3.46641	3.11577	3.60155	3.68667	4.20305	none	none	none
ENSMUSG00000011171	Vipr2	1314	0.319916	0.274705	2.39102	0	0.488912	0	4.04598	3.18448	2.13833	2.23196	1.44108	1.00192	0	0.575222	0.396372	0.996543	0.217815	2.04367	1.3552	0.404756	NA	NA	NA	1.42223	0.725378	0.0439307	0.0101596	0.0109096	0	none	none	none
ENSMUSG00000011179	Odc1	1386	6.36923	8.20369	6.04483	9.1097	7.64798	8.52112	11.5074	9.56034	6.89264	15.9515	12.1252	20.2188	2.94892	4.54451	2.0668	2.97684	3.23669	3.36739	4.0958	2.06583	12.6467	13.2027	13.0895	2.82782	3.42223	1.89516	1.1572	0.443254	1.43073	none	none	none
ENSMUSG00000011254	Thg1l	897	6.32663	9.45665	7.78348	10.4266	5.37149	6.58321	10.6684	6.99734	3.75888	1.25752	2.37489	3.56442	4.88199	4.77492	4.64511	3.14659	3.08073	3.0253	1.76509	2.52791	9.56919	9.85416	9.206	1.41143	1.0612	0.819585	0.676926	0.17853	0.289772	none	none	none
ENSMUSG00000011256	Adam19	2763	6.23784	3.72328	4.42205	3.5542	2.44137	2.40437	1.53932	3.78611	5.69478	0.163301	0.856668	0.408416	0.845292	0.547117	1.69652	2.53466	1.92599	2.22447	0.561818	1.02123	11.8472	9.92235	10.2954	2.24489	1.03797	0.0718514	0.0106872	0.00819233	0.006587	none	none	none
ENSMUSG00000011257	Pabpc4	1983	1.48391	1.54724	1.58437	1.65074	1.61984	2.23341	0.5362	1.9343	1.41693	0.227534	0.71618	1.23297	2.20834	1.9058	1.83854	1.34398	1.50318	1.199	0.787066	1.57736	9.97823	10.2493	10.1244	1.38957	1.28293	1.1691	1.23838	0.589267	1.00935	none	none	none
ENSMUSG00000011263	Exoc3l2	2370	0	0	0	0.394625	0.406601	0	0.448643	0	0	0	0	0	0.246365	0.318921	0.549401	0	0.341503	0.201066	0	0.45582	NA	NA	NA	NA	NA	NA	NA	NA	NA	none	none	none
ENSMUSG00000011267	Zfp296	1338	2.19924	1.61867	1.30452	0.699	1.20035	0.551676	2.38405	0.260613	0.419995	0.16861	0	0.140565	0.436387	0.564904	0	1.43695	0.861566	1.01546	0.141509	0.415503	7.93259	7.3136	5.70368	1.38957	0.863938	0.898124	1.05396	0.918154	0.896595	none	none	none
ENSMUSG00000011305	Plin5	1392	0	0	0.501565	0	0.230758	0	2.29156	0.250503	0	1.29655	0.510124	0.81067	0	0.180997	0	0.223037	0.10691	0.885461	0.904926	0.0845164	NA	NA	NA	0.333424	0.647698	0	0.0571207	0	0	none	none	none
ENSMUSG00000011306	Sugp1	1932	30.7879	25.783	26.3804	29.0454	27.7655	21.3954	21.4638	19.4926	25.5962	12.1441	11.6388	9.15067	18.2842	11.0846	15.3662	4.84049	4.75856	4.53507	3.5823	3.99201	12.6206	12.6912	12.5248	3.81967	3.92726	1.24792	1.07111	1.06458	0.863809	none	none	none
ENSMUSG00000011349	Dmrtc2	1113	0	0	0	0	0	0	0	0	0	0	0	0	0	0	0	0	0	0	0	0	NA	NA	NA	0	0	0	0	0	0	none	none	none
ENSMUSG00000011382	Dhdh	1002	2.93671	2.52169	3.13553	2.33349	2.56459	2.94667	0	3.13204	1.12166	5.62873	10.3939	11.262	10.7803	10.3092	14.0344	1.95034	1.85396	1.27376	3.33555	3.66766	8.45207	8.57832	8.94496	2.04264	2.55254	0.656158	0.332772	0.811842	1.33826	none	none	none
ENSMUSG00000011427	Zfp790	2340	6.82651	6.63307	5.07223	6.79464	7.54992	5.36257	2.27198	6.10971	5.76362	3.18153	2.93343	3.77758	5.11524	4.30679	6.89992	2.84344	2.92011	2.51478	2.1035	2.68721	12.0247	11.9482	11.9437	2.46989	2.03092	0.815018	0.42173	1.14745	1.16345	none	none	none
ENSMUSG00000011463	Cpb1	1248	0	0.289233	0	0	0	0	0	0	0	0.180769	0	0	0	0	0	0.132789	0	0	0.0844131	0	NA	NA	NA	0.0285692	0	0.0172804	0	0	0	none	none	none
ENSMUSG00000011486	Slc25a41	939	0	0	0	0	0	0	0	0	0	0	0	0	0	0	0	0	0	0	0	0	NA	NA	NA	0.0565835	0.00958605	0.0527882	0	0	0	none	none	none
ENSMUSG00000011589	Fsd1	1491	39.3303	36.1931	39.0998	26.659	25.8523	23.7631	31.3779	23.6209	15.0759	6.50623	7.14378	5.17176	1.17482	5.23834	2.44522	5.29307	4.72382	4.60634	2.86273	1.98287	12.7091	12.8177	12.7392	4.06867	3.22033	3.29362	1.90136	0.722292	0.179928	none	none	none
ENSMUSG00000011632	Pinlyp	639	0	0	0	0	0	0	0	0	0	0	0	0	0	0	0	0	0	0	0	0	NA	NA	NA	0.0285692	0.00958605	0	0	0.159131	0	none	none	none
ENSMUSG00000011658	Fuz	1248	5.22093	6.36312	5.03494	4.12175	3.86076	6.50606	0	1.95585	3.60226	14.4615	16.6902	25.3178	6.31607	4.64326	4.382	2.70922	2.54338	1.51233	4.30912	2.61206	9.829	9.78682	8.73695	3.94673	4.6427	2.62357	2.72572	2.56518	2.49653	none	none	none
ENSMUSG00000011751	Sptbn4	7686	8.28597	5.89393	5.40484	8.88292	8.27486	4.51375	8.16209	6.26082	4.16749	0.851209	0.954673	0.783036	0.683707	2.16348	1.35528	2.91231	3.03981	2.84736	0.897606	1.26353	13.6293	14.1938	14.4294	4.47768	3.58896	2.53287	1.22437	0.155721	0.106226	none	none	none
ENSMUSG00000011752	Pgam1	765	0.274751	0.235923	0	1.22256	0	0	0	0	0	0	0	0.24585	0	0.329343	0	0.226786	0.493157	0	0.113634	0.150275	16.3213	16.3547	17.0961	3.45154	3.43296	3.10948	1.55445	1.12371	0.744845	none	none	none
ENSMUSG00000011831	Evi5	2430	9.94701	11.8093	13.0729	6.35055	7.00592	10.3279	10.5016	8.1794	8.55648	24.0454	19.0916	23.0644	12.2544	11.5087	15.6464	3.65646	3.15296	3.3333	4.52777	3.82135	10.7706	10.5962	11.3128	3.24184	3.38681	0.199533	0.147923	0.267544	0.448463	none	none	none
ENSMUSG00000011832	Evi5l	2442	25.3048	22.6156	20.5851	22.2134	19.4676	20.5543	23.5124	24.2748	19.5602	9.97738	11.5344	9.93519	5.61888	8.66649	6.825	4.57502	4.44262	4.55146	3.52134	3.00662	13.6198	13.5593	14.0252	4.31325	3.74488	0.0330055	0.0325398	0	0.0521557	none	none	none
ENSMUSG00000011837	Snapc2	1080	21.6023	15.0401	17.4544	22.5156	14.8711	13.6693	6.89166	17.435	9.88621	12.7422	13.5882	14.1057	11.3533	7.46511	6.26928	4.25038	4.17142	3.63277	3.85586	3.22691	12.5186	12.6526	12.2423	3.90111	4.40916	3.69707	3.45922	4.52103	3.25096	none	none	none
ENSMUSG00000011877	Git1	2313	95.2328	80.3699	74.5568	116.655	115.682	94.7809	48.7281	23.3673	17.4927	22.1406	19.8527	23.7432	18.1754	19.8247	16.3253	6.39894	6.78187	4.94779	4.51804	4.25614	15.642	16.3655	14.9193	6.40497	5.62936	6.01994	4.55235	3.17052	2.71205	none	none	none
ENSMUSG00000011884	Gltp	630	3.33626	5.44308	3.32466	6.68044	4.07892	4.68662	8.43877	7.7489	11.5959	68.7542	80.7777	74.0361	285.919	253.947	283.151	2.3319	2.62027	3.35912	6.23884	8.10506	8.67762	9.51144	10.4552	4.8339	5.4044	1.77824	3.26896	2.18499	2.28705	Cx3cr1	none	none
ENSMUSG00000011958	Bnip2	1047	9.23447	8.27421	7.66862	7.59286	11.0446	14.8051	19.2955	14.9871	16.6385	26.7186	19.8943	17.0651	96.1989	79.1697	94.0185	3.2315	3.60259	4.16782	4.47418	6.50455	10.5204	10.6678	9.24536	2.1635	2.48714	1.22089	2.98506	2.12868	2.55443	Cx3cr1	none	none
ENSMUSG00000011960	Ccnt1	2175	22.613	23.4833	21.5071	23.0053	20.8236	26.4713	32.7541	25.9722	23.2532	11.4096	13.2768	9.16598	13.1542	15.4064	12.931	4.5567	4.61078	4.82408	3.61873	3.8905	11.5551	11.254	11.0735	3.25701	2.10657	0.900441	0.659876	0.631143	1.04116	none	none	none
ENSMUSG00000012017	Scarf2	2502	0.25202	0.288539	0.279048	0	0.38515	0	0	0.557475	0	0.0901677	0.0946033	0.30068	1.63357	0.906285	1.45717	0.348462	0.174257	0.245891	0.216383	1.22178	7.4632	7.69896	7.77724	0.526069	0.163499	0.911103	1.30057	1.9866	1.45112	Cx3cr1	none	none
ENSMUSG00000012042	4930579F01Rik	984	0	0	0	0	0	0	0	0	0	0	0	0	0	0	0	0	0	0	0	0	NA	NA	NA	0	0	0	0	0	0	none	none	none
ENSMUSG00000012076	Brms1l	972	59.2496	60.9031	66.0827	85.6361	81.9561	79.7376	64.5409	72.4666	87.8774	21.3531	20.6988	17.0274	20.424	18.6628	15.5392	5.97908	6.38272	6.2472	4.37108	4.26369	13.9974	14.1099	14.0625	4.64155	3.83053	1.37688	0.791503	0.439004	0.442458	none	none	none
ENSMUSG00000012114	Med15	2370	33.5231	36.5532	28.8698	28.8077	20.8722	16.507	27.8159	29.5733	20.3915	16.1823	14.9808	15.7126	22.2961	19.9857	17.2512	5.0867	4.52746	4.75098	4.0553	4.38158	13.0951	13.0121	12.4132	4.07211	4.21205	0.654574	1.06446	0.814948	0.770787	none	none	none
ENSMUSG00000012117	Dhdds	1005	69.6433	61.7767	67.7337	51.1835	62.6449	50.6784	57.1317	49.2692	46.41	34.1205	25.4361	31.2523	41.2496	26.5736	27.4668	6.07435	5.80311	5.69869	4.96669	5.03401	12.1791	12.385	12.2431	4.61706	4.25399	1.83947	1.85033	1.23814	0.770658	none	none	none
ENSMUSG00000012123	Crybg2	5478	0.115107	0.0658931	0.191177	0	0	0	0	0	0	0	0	0	0	0	0.0950771	0.168718	0	0	0	0.0450129	NA	NA	NA	NA	NA	NA	NA	NA	NA	none	none	none
ENSMUSG00000012126	Ubxn11	1455	2.74468	1.98467	2.39924	2.24977	1.10383	1.52194	0.73078	0.71897	0.386222	1.86062	1.46411	0.775569	0	0	0.536941	1.7554	1.39242	0.688843	1.24292	0.23754	8.97107	8.83333	8.14345	1.774	1.54267	0.33009	0.214868	0.0751505	0.13163	none	none	none
ENSMUSG00000012187	Mogat1	1008	0	0	0	0	0	0	0	0	0	1.34286	0.939275	0.559748	0	0	0	0	0	0	0.96147	0	NA	NA	NA	0.31034	0.172061	0	0.0128804	0	0	none	none	none
ENSMUSG00000012211	Tex22	570	0	0.316634	0	0	0	0	0	0	0	0	0	0.329957	0	0	0	0.144757	0	0	0.150541	0	NA	NA	NA	0	0.00958605	0.0774544	0	0	0.0411135	none	none	none
ENSMUSG00000012282	Wnt8a	1065	0	0	0	0	0	0	0	0	0	0	0	0	0	0	0	0	0	0	0	0	NA	NA	NA	0	0	0	0	0	0	none	none	none
ENSMUSG00000012296	Tjap1	1650	2.42031	2.84395	2.32726	2.2673	2.53078	1.78943	2.57766	1.05667	1.70289	2.18763	1.29108	2.62166	4.77725	3.51199	5.0505	1.81987	1.6762	1.4746	1.60096	2.44535	8.56578	9.05279	9.20876	2.31615	2.09085	0.831189	0.92351	0.597557	0.763124	none	none	none
ENSMUSG00000012350	Ehf	903	0.232763	0	0	0	0	0	0	0	0	0	0	0	0	0	0.28839	0.107805	0	0	0	0.132419	NA	NA	NA	0.0285692	0	0	0.00745204	0	0.00981948	none	none	none
ENSMUSG00000012396	Nanog	918	0	0	0	0	0	0	0	0	0	0.491503	0	0	0	0	0	0	0	0	0.218886	0	NA	NA	NA	0	0.0749621	0	0	0	0	none	none	none
ENSMUSG00000012405	Rpl15	615	0.341764	0.586931	0.567624	0	0.522301	0	0	0	0	0.733657	0	0.305814	0	0.819341	0.423441	0.583782	0.231556	0	0.429204	0.500048	13.974	13.9452	14.12	4.45549	4.11659	3.98728	3.55812	3.43277	2.9756	none	none	none
ENSMUSG00000012422	Tmem167	219	124.767	141.748	122.739	123.847	126.139	121.338	106.814	194.253	189.884	131.857	127.536	118.513	138.64	130	101.075	7.03068	6.96319	7.36326	6.98833	6.95696	13.5061	13.2022	13.4104	2.46989	1.76553	1.62514	0.855135	1.43903	1.83477	none	none	none
ENSMUSG00000012428	Steap4	1413	0.148751	0	0.247055	0	0	0	0	0	0	0.95796	0.502542	0.133104	0.206612	0.178307	0	0.178791	0	0	0.614665	0.174159	NA	NA	NA	0.111031	0.0191088	0.0496216	0.0294383	0.111147	0	none	none	none
ENSMUSG00000012429	Mplkip	537	2.73984	2.01655	5.85065	10.4499	5.98166	6.87283	5.94014	5.84415	10.4647	6.72178	11.4602	7.00467	7.06752	6.56846	6.3043	2.18132	3.13227	3.07319	3.23198	2.93485	10.1706	10.6194	10.1616	1.53605	1.78241	2.05633	2.27295	3.21913	3.1131	none	none	none
ENSMUSG00000012443	Kif11	3159	0.798422	0.399927	1.21557	0.592125	0.610095	3.27128	0	0.6623	0.533668	0.999809	0.749279	0.595364	3.04974	1.27609	0.65949	0.85171	1.31682	0.484041	0.833079	1.41239	NA	NA	NA	0.286881	0.415037	0.0146495	0	0	0.0262072	none	none	OPC
ENSMUSG00000012483	Rpa3	366	32.1594	35.0114	30.5214	16.6098	32.4726	22.1846	17.4309	50.4949	49.1325	70.8851	67.905	58.067	47.8595	30.2888	31.3069	5.06885	4.62969	5.32263	6.05786	5.22824	9.22223	9.07898	10.433	2.15704	2.50927	1.69667	2.3415	2.17031	3.03762	none	none	none
ENSMUSG00000012519	Mlkl	1419	0	0	0	0	0	0	0	0	0	0	0	0	0.822954	1.42042	0.550563	0	0	0	0	0.949582	NA	NA	NA	0.0285692	0	0	0.0334631	0.0653381	0.0516147	Cx3cr1	none	none
ENSMUSG00000012520	Phox2b	945	0	0	0	0	0	0	0	0.368995	0	0.23873	0.500947	0	0	0.266611	0	0	0	0.167356	0.317951	0.122832	NA	NA	NA	0	0	0.26608	0.0695518	0	0	none	none	none
ENSMUSG00000012535	Tnpo3	2790	36.2361	38.9425	34.6587	35.8685	38.3386	36.7748	30.4884	35.495	27.7955	26.603	19.1733	24.9419	19.0443	17.6995	16.3344	5.23314	5.2477	5.01166	4.61899	4.22441	12.8577	13.0202	12.7101	4.49442	4.2765	1.04907	0.653358	0.762232	1.14293	none	none	none
ENSMUSG00000012609	Ttll5	3987	3.05761	2.48971	3.06449	2.81493	2.17527	3.51761	36.0029	37.9574	31.431	2.48969	2.61216	2.31144	1.46447	2.84365	1.89417	1.95256	1.93958	5.17514	1.79539	1.61703	11.5277	11.6631	13.1404	3.65076	2.57531	1.47109	0.907989	0.115011	0.0938524	PV	none	none
ENSMUSG00000012640	Zfp715	2661	11.8481	12.9545	13.2499	16.3434	19.4347	13.5922	8.3912	7.99351	8.8696	6.10416	3.55802	5.23021	19.1995	17.5161	14.386	3.77443	4.12571	3.23544	2.57631	4.17264	11.4805	11.9429	11.5636	2.70929	1.66297	0.472228	0.0176741	0.783021	2.36517	none	none	none
ENSMUSG00000012705	Retn	345	1.21846	1.04627	0	0	0.931058	0	0	0	0	0	0	0.545146	0	0	0	0.811397	0.389955	0	0.240883	0	NA	NA	NA	0.111031	0.00958605	0.173527	0.363978	0	0.159558	none	none	none
ENSMUSG00000012777	Acp4	1460	0	0	0	0	0	0	0	0	0	0	0	0	0	0	0	0	0	0	0	0	NA	NA	NA	NA	NA	NA	NA	NA	NA	none	none	none
ENSMUSG00000012819	Cdh23	10065	0.125296	0.107589	0.138734	0.603994	0.925508	0	0.422567	1.31651	1.06081	0.0896571	0.0940675	0.0747443	4.23484	4.88125	4.03626	0.168479	0.59439	0.951062	0.119232	2.42871	NA	NA	NA	0.214125	0.0565835	0.0116041	0.0576337	0.10305	0.0907266	Cx3cr1	none	none
ENSMUSG00000012848	Rps5	615	198.906	238.881	207.751	204.541	260.628	194.437	229.946	293.702	192.8	247.243	211.681	240.064	337.514	312.169	232.046	7.75608	7.78705	7.90579	7.87034	8.20413	13.567	13.9601	13.6779	7.57168	7.48639	6.97951	8.15173	7.49519	6.31781	none	none	none
ENSMUSG00000012889	Podnl1	1680	0	0	0	0	0	0	0	0	0	0	0	0.223899	0	0	0	0	0	0	0.103844	0	NA	NA	NA	0	0	0	0.06915	0.333544	0	none	none	none
ENSMUSG00000013033	Adgrl1	4551	130.378	111.358	109.459	98.9516	85.1915	74.6089	65.6522	47.0451	42.3533	31.577	30.7379	28.5977	4.23384	8.58094	7.03828	6.88344	6.44709	5.71928	4.96828	2.92935	15.971	15.2005	15.2167	5.86641	5.09452	4.22931	2.20591	0.850834	0.643485	none	none	none
ENSMUSG00000013076	Amotl1	3018	2.2286	2.99008	2.31338	0.309895	0.319299	0.733739	4.22777	3.81283	4.09641	10.2409	10.1173	11.2172	6.77137	8.18119	5.69499	1.81175	0.540336	2.33505	3.52671	2.97866	8.92608	7.7874	10.3345	2.89142	3.03797	1.1228	0.873288	0.372803	0.401508	none	none	none
ENSMUSG00000013083	2200002J24Rik	333	0	0	0	0	0	0	0	0	0	0	0	0	0	0	0	0	0	0	0	0	NA	NA	NA	0	0.00958605	0	0	0	0	none	none	none
ENSMUSG00000013089	Etv5	1587	63.1746	47.3095	44.6535	29.4664	29.3486	21.3954	24.1199	12.7439	14.1639	45.916	40.8665	50.8408	79.8382	61.2802	69.5756	5.72007	4.79373	4.17067	5.55073	6.15444	13.4918	13.0371	12.0205	4.45418	5.02916	0.659674	1.75458	1.66906	1.62444	none	none	none
ENSMUSG00000013091	Tmem190	501	0	0	0	0	0	0	0	0	0	0	0	0	0	0	0	0	0	0	0	0	NA	NA	NA	0.485427	0.356144	0	0	0	0	none	none	none
ENSMUSG00000013150	Gfod2	1158	7.98629	7.32523	7.53646	11.711	6.6573	8.28657	12.8549	9.63594	8.73502	4.286	3.88364	4.71001	1.26055	1.95814	1.79908	3.10702	3.30523	3.51205	2.40414	1.41824	12.4227	12.465	12.6071	3.62527	3.14405	0.563555	0.187294	0.113968	0.0437261	none	none	none
ENSMUSG00000013155	Enkd1	1041	4.03813	5.89468	4.35942	4.94135	4.01133	4.25442	2.04281	3.34967	1.61946	3.25072	2.27375	3.43269	1.12178	0.726073	0.750479	2.52709	2.43359	1.73869	1.99484	0.900034	9.73062	9.8975	7.96773	2.11103	2.28096	2.28937	1.57354	1.19841	1.32965	none	none	none
ENSMUSG00000013158	4933405L10Rik	924	0	0	0	0	0	0	0	0	0	0.244155	0.256166	0	0	0	0	0	0	0	0.222525	0	NA	NA	NA	0.189034	0.172061	0	0.319167	0	0	none	none	none
ENSMUSG00000013160	Atp6v0d1	1056	608.063	647.237	611.236	498.186	607.753	601.138	457.132	414.742	315.566	319.172	294.751	288.525	187.717	164.386	164.24	9.2835	9.15488	8.63232	8.23753	7.43558	15.4595	15.3623	15.3032	7.27314	7.20594	2.90199	2.37804	2.46127	1.85729	none	none	none
ENSMUSG00000013236	Ptprs	5724	129.621	113.163	108.313	130.878	112.178	96.8457	72.2603	60.0053	52.229	55.5328	63.3095	53.1303	18.6672	24.2088	19.3356	6.88304	6.83669	5.96574	5.86602	4.44209	NA	NA	NA	5.76607	5.26729	2.76217	1.85838	1.06255	1.08836	none	none	none
ENSMUSG00000013275	Slc41a1	1539	10.3795	9.73355	7.71217	14.2811	14.4015	12.4702	11.7452	7.93017	5.84226	99.0938	126.885	154.469	9.10543	6.22092	6.43003	3.36108	3.87947	3.24882	6.99792	3.04477	11.268	11.7255	10.9527	4.06695	5.47854	1.83764	1.53164	1.43337	1.26097	GFAP	none	none
ENSMUSG00000013338	Fer1l4	5985	0	0	0	0	0	0	0	0	0	0	0	0	0	0	0	0	0	0	0	0	NA	NA	NA	0	0	0	0	0	0	none	none	none
ENSMUSG00000013353	4931406B18Rik	1104	0	0	0	0	0	0	0	0	0	0	0	0	0	0	0	0	0	0	0	0	NA	NA	NA	0	0	0	0	0	0	none	none	none
ENSMUSG00000013367	Iglon5	1011	7.48432	8.21181	5.52465	7.86323	3.81264	5.11078	31.5515	35.8703	23.3452	11.8267	11.0037	7.99925	0.577533	2.24285	1.28791	3.01321	2.72149	4.96605	3.49525	1.24454	11.6421	11.1252	13.9371	3.85599	3.18587	2.24412	0.955527	0.291163	0.0567368	none	none	none
ENSMUSG00000013415	Igf2bp1	1734	0	0	0	0	0	0	0	0	0	0	0	0	0	0	0	0	0	0	0	0	NA	NA	NA	0	0	0.017487	0.00609033	0	0	none	none	none
ENSMUSG00000013418	B4galnt2	1533	0	0	0	0	0	0	0	0	0	0	0	0	0	0	0	0	0	0	0	0	NA	NA	NA	0.0565835	0	0	0	0	0.0201998	none	none	none
ENSMUSG00000013419	Zfp651	2190	19.4829	15.9054	11.4769	15.3742	16.1341	12.8079	12.138	11.6234	7.95458	12.3616	14.9152	14.5136	2.13292	2.76107	1.90258	4.055	3.9793	3.53256	3.90015	1.70731	14.0628	13.9283	14.4311	3.80941	3.76483	4.63831	3.27598	1.62644	1.51774	none	none	none
ENSMUSG00000013465	Nelfb	1896	15.7417	17.1343	14.7295	12.332	12.8757	14.4047	14.5809	15.8166	11.8555	15.5873	13.7324	19.74	20.941	18.7366	15.7953	4.07626	3.82824	3.91498	4.11713	4.28473	13.3306	13.551	13.7683	4.39232	4.45374	3.27695	3.92104	3.43858	2.93204	none	none	none
ENSMUSG00000013483	Card14	3000	0	0	0	0.311754	0	0.246047	0	0	0	0	0	0	0	0	0	0	0.246023	0	0	0	NA	NA	NA	0.695994	1.26704	0.0301773	0.0249053	0	0.0261834	none	none	none
ENSMUSG00000013495	Tmem175	1500	24.5215	28.877	29.3235	24.0051	21.8426	24.6047	36.8605	28.1285	21.3542	28.1248	27.9303	32.9759	13.0401	16.9645	22.3958	4.83663	4.61378	4.89632	4.93908	4.20686	11.2632	10.9034	11.4982	3.58496	3.61196	0.971186	1.06166	1.88164	1.96861	none	none	none
ENSMUSG00000013523	Bcas1	1902	3.42572	2.46715	6.05675	0	0.675531	0.388087	2.23614	2.2	2.95454	9.25172	8.83571	4.54862	4.91176	5.43104	4.7921	2.31707	0.437802	1.79226	3.09514	2.59573	5.26635	5.71326	8.0234	5.06523	5.26379	1.0344	0.443834	0.0845565	0.0269548	none	OL	Olig
ENSMUSG00000013539	Tango2	831	76.1319	67.5447	60.492	33.764	32.0828	29.3125	89.5667	84.7624	48.689	12.4881	11.6782	16.069	24.5921	19.4039	26.0103	6.1097	5.03209	6.23533	3.84918	4.60499	14.259	13.888	15.186	5.43296	4.03445	2.18919	1.34799	1.14802	1.33437	none	none	none
ENSMUSG00000013584	Aldh1a2	1557	0.40498	0.695496	0.896825	0	0.412608	0	0	0.447914	0.72184	1.15915	0.912129	0.966348	0.750014	0.970895	1.83981	0.736187	0.185912	0.475	1.00902	1.12889	4.88723	5.20597	6.83676	1.37851	0.154886	0.11954	0.0596734	0	0	none	none	none
ENSMUSG00000013593	Ndufs2	1392	206.41	212.636	199.372	212.315	204.913	194.611	307.069	289.081	169.151	148.941	149.636	202.803	105.913	98.4622	96.7207	7.69446	7.6791	8.00057	7.3934	6.66342	15.3676	15.6274	16.5041	6.82909	7.41397	4.67382	4.55264	3.60396	3.43212	none	none	none
ENSMUSG00000013611	Snx31	1320	0.159231	0	0	0.354266	0	0	0	0	0	0	0	0	0	0	0	0.0746108	0.161035	0	0	0	2.30671	2.65949	2.52159	0.238787	0.00958605	0	0.00676634	0	0	none	none	none
ENSMUSG00000013622	Atraid	672	77.8809	78.4234	77.4022	90.4643	87.9517	81.2835	47.4681	77.835	87.8051	255.478	261.001	270.079	170.3	197.959	178.649	6.30199	6.45231	6.17065	8.03994	7.51808	12.6912	12.4399	12.9477	5.52168	6.49132	3.16369	3.98936	5.54442	4.80794	none	none	none
ENSMUSG00000013629	Cad	6678	3.27332	2.43236	2.40463	1.82067	2.26072	2.21067	1.27378	2.14087	0.841499	4.86468	4.67865	5.52003	6.99474	5.54601	6.12239	1.88886	1.63104	1.27424	2.59003	2.85221	9.38228	8.87269	9.12443	1.9855	2.76553	1.00804	0.912523	1.63527	0.850994	none	none	none
ENSMUSG00000013643	Lypd8	768	0	0	0	0	0.418249	0	0	0	0	0	0	0	0	0	0	0	0.188295	0	0	0	NA	NA	NA	0	0	0.0362584	0	0.0628349	0	none	none	none
ENSMUSG00000013646	Sh3bp5l	1179	9.27023	9.79711	7.9944	5.9495	5.44894	6.88682	19.8408	15.3795	11.9159	9.56742	10.2388	7.81654	7.92381	5.3424	5.30109	3.32489	2.82682	4.06282	3.35157	2.84581	12.2476	12.166	12.8454	4.23113	3.95047	3.08875	2.62671	1.82621	1.35798	none	none	none
ENSMUSG00000013653	1810065E05Rik	708	0	0	0	0	0	0	0	0	0	0	0	0	0	0	0	0	0	0	0	0	NA	NA	NA	0	0	0	0	0	0	none	none	none
ENSMUSG00000013662	Atad1	1086	175.928	206.24	237.869	241.566	288.088	293.626	347.575	377.277	498.306	315.133	291.404	224.27	130.111	109.038	134.285	7.69821	8.10552	8.67497	8.11861	6.97129	13.1208	12.5587	13.2857	5.29793	5.41819	0.751161	0.152077	1.02461	1.03165	none	none	none
ENSMUSG00000013663	Pten	1212	176.715	177.056	175.409	135.042	165.908	197.325	100.012	125.728	153.007	91.9523	73.4309	64.554	105.504	95.8315	93.6811	7.47081	7.3845	6.99151	6.27883	6.63429	13.6435	13.2239	12.7284	4.0635	3.14839	0.765038	0.0889113	0.570745	1.40581	none	none	none
ENSMUSG00000013668	4933402N03Rik	990	0	0	0	0	0	0	0	0	0	0	0	0	0	0	0	0	0	0	0	0	NA	NA	NA	0	0	0	0	0	0	none	none	none
ENSMUSG00000013698	Pea15a	393	450.319	436.278	427.257	464.061	481.414	454.53	646.629	533.255	573.392	2028.67	2228.45	2160.71	1004.34	885.342	944.257	8.77792	8.86934	9.19334	11.0636	9.88516	16.4818	16.7019	16.0651	7.95233	8.94433	5.87464	6.11948	4.22014	4.08984	none	none	none
ENSMUSG00000013701	Timm23	630	0.333626	0	0	0.742272	0	0	0	0.553493	0	0	0	0	0	0	0	0.15213	0.318952	0.244275	0	0	12.9386	13.3606	13.6486	0.678072	0.62293	0.452549	0.151877	0.51382	0.266437	none	none	none
ENSMUSG00000013707	Tnfaip8l2	555	3.02969	0.325191	0	0	0	0	0	0	0	0	0	0	332.973	291.442	291.854	1.0829	0	0	0	8.25938	NA	NA	NA	1.23879	1.08859	2.6183	7.63312	7.92103	6.9755	Cx3cr1	none	none
ENSMUSG00000013736	Trnt1	1305	34.1449	36.5111	38.7877	38.7005	42.8287	41.8563	35.8502	41.4166	42.6309	24.2023	19.7701	17.4384	20.8051	17.7618	20.953	5.2281	5.39672	5.35635	4.42427	4.38128	11.716	11.8502	12.3094	4.01436	3.59614	0.850413	0.259337	0.995291	1.06305	none	none	none
ENSMUSG00000013766	Ly6g6e	501	3.77577	1.44097	0.696784	2.80019	4.48803	2.94667	0	1.39202	0	0	1.41735	0.7508	2.9136	1.00578	0	1.57103	2.14131	0.549922	0.784685	1.20568	8.91968	9.64356	4.0276	1.47508	0.910733	2.85898	1.76664	2.50638	2.57407	none	none	none
ENSMUSG00000013787	Ehmt2	3792	30.1531	26.5582	27.3416	29.7202	27.9538	20.0497	18.5065	12.5061	10.8182	9.51897	12.1095	11.4075	19.1703	18.4044	13.8724	4.85886	4.74996	3.90146	3.58641	4.18182	13.9505	14.1588	13.419	5.12598	4.92916	4.13909	3.24031	2.77581	2.66102	none	none	none
ENSMUSG00000013822	Elof1	252	118.437	109.578	98.3544	109.485	90.501	82.0158	248.944	124.536	160.558	116.381	136.195	142.549	113.533	103.978	125.041	6.7786	6.56987	7.48392	7.05211	6.8478	NA	NA	NA	5.06005	4.80667	7.63003	6.8036	5.87012	5.04109	none	none	none
ENSMUSG00000013833	Med16	2598	12.9444	11.254	10.7495	10.4398	9.76751	6.25062	8.18541	7.51626	4.97495	7.03371	5.64867	9.77297	5.16912	6.30353	6.31494	3.66099	3.29562	2.98043	3.08493	2.79269	11.6701	11.7558	10.8211	3.98732	3.93168	3.11624	1.66885	2.02858	1.16691	none	none	none
ENSMUSG00000013846	St3gal1	1014	12.8515	10.5014	13.0822	11.0682	7.60272	8.73541	14.6805	14.0993	12.7465	3.55976	3.50144	2.96766	6.04615	6.21172	3.59549	3.71645	3.34134	3.89162	2.11868	2.65179	10.7846	10.0369	11.6493	2.25701	0.815575	0.234301	0.12071	0.175164	0.0885176	none	none	none
ENSMUSG00000013858	Tmem259	1725	30.2178	31.8065	26.5105	27.3801	21.7868	11.5535	36.3674	29.7154	25.7358	32.8264	30.7364	41.2131	16.9242	24.2454	20.6823	4.93129	4.40872	4.98214	5.16693	4.43412	12.515	12.0894	12.5847	5.25096	5.55008	6.91746	6.70143	6.62089	6.57203	none	none	none
ENSMUSG00000013878	Rnf170	861	0.976467	0.628854	0.405446	0.543125	0.373072	2.57192	2.46988	2.02497	0	0.786061	0.27491	0.436877	0	0	0	0.740069	1.11284	1.32094	0.584272	0	8.33488	8.21572	9.20094	2.02857	1.0612	0.955133	0.950865	0.425203	0.955464	none	none	none
ENSMUSG00000013921	Clip3	1644	446.578	402.679	366.076	310.616	300.113	264.456	534.229	357.821	315.5	137.089	148.008	173.89	25.9268	20.2294	17.266	8.66573	8.19342	8.65649	7.26674	4.46863	14.8074	14.4201	14.7316	7.7502	7.45269	5.07838	3.95537	1.44327	0.331836	none	none	none
ENSMUSG00000013928	Thap8	642	0	0	0	0	0	0	0	0	0	0	0.368687	0.292952	0	0	0	0	0	0	0.287527	0	NA	NA	NA	NA	NA	NA	NA	NA	NA	none	none	none
ENSMUSG00000013936	Myl2	531	0	0.339889	0	0	0	0	0	0.656687	0	2.12429	2.67455	3.18772	8.79677	5.69373	18.6362	0.154838	0	0.285575	1.8727	3.59003	NA	NA	NA	0.748461	1.07496	0.106773	1.00147	0.241844	1.01214	Cx3cr1	none	none
ENSMUSG00000013973	Dedd	957	27.4536	24.7054	21.5217	20.0343	23.1597	10.027	17.777	13.4816	13.5057	11.3153	14.5926	12.7742	22.8795	15.0063	15.5107	4.67583	4.22808	3.9929	3.7964	4.23257	10.9512	11.0683	10.7208	3.7845	3.4794	2.79295	2.86339	3.46086	3.498	none	none	none
ENSMUSG00000013974	Mcemp1	552	0	0	0.632408	0	0	0	1.92624	0	0	0	0	0	0	0	0	0.275964	0	0.715524	0	0	NA	NA	NA	0.333424	0.0285692	0.130157	0.340832	0.763177	0.107847	none	none	none
ENSMUSG00000013997	Nit1	972	28.1111	24.1384	24.781	34.1582	26.4374	31.895	24.0661	15.7848	19.6568	16.0148	16.3156	18.9623	25.53	20.218	20.6297	4.73752	4.99233	4.381	4.17772	4.53144	11.5983	11.8416	11.8386	4.13093	4.26303	3.12875	2.49878	3.52019	3.82498	none	none	none
ENSMUSG00000014030	Pax5	1176	0	0	0.296844	0	0	0	0	1.18606	0	0.191836	0	0	0.248251	0	0	0.136123	0	0.480629	0.0894242	0.1147	NA	NA	NA	0	0	0	0	0	0	none	none	none
ENSMUSG00000014039	Prdm15	3525	6.02231	5.47844	3.96129	6.36774	5.74086	4.60684	3.01641	2.96767	3.18838	1.6	0.940075	0.800321	3.47847	2.35866	1.25591	2.62153	2.71629	2.02059	1.07961	1.75033	9.06798	9.03072	8.08821	1.88753	1.20997	0.089078	0.0318522	0.110133	0.145237	none	none	none
ENSMUSG00000014074	Rnf168	1704	19.6123	23.5134	22.74	23.0522	25.4484	35.5209	16.2238	20.4637	28.0317	10.7239	7.91769	7.50536	10.2797	5.61854	7.79415	4.52075	4.85834	4.49653	3.28031	3.15339	13.3652	13.2423	12.8852	3.24489	2.63537	1.05718	0.832716	0.924003	1.16826	none	none	none
ENSMUSG00000014075	Tctex1d2	435	41.0706	41.075	48.9527	34.4004	37.6597	59.3907	34.2207	63.3273	98.1803	27.4869	29.9273	19.0237	30.201	37.6473	32.9262	5.48218	5.48597	6.04969	4.72679	5.11235	10.8903	10.9464	11.3681	3.0072	2.59614	0.205353	0.344788	0.46082	0.406847	none	none	none
ENSMUSG00000014077	Chp1	588	173.367	158.075	163.264	159.058	184.098	148.131	142.856	169.013	196.875	106.277	88.5602	113.549	73.4822	74.5559	67.3185	7.37419	7.36424	7.41432	6.6976	6.18558	15.4585	15.3971	15.2936	5.55152	4.99035	2.29946	1.85049	1.19232	1.15067	none	none	none
ENSMUSG00000014104	Sval2	435	0	0	0	0	0	0	0	0	0	0	0	0	0	0	0	0	0	0	0	0	NA	NA	NA	0	0	0	0	0	0	none	none	none
ENSMUSG00000014158	Trpv4	2616	0.0803458	0.0689913	0	0	0	0	0	0	0	0	0.271442	0.215683	3.45957	2.60037	1.8914	0.0700857	0	0	0.217075	1.86807	NA	NA	NA	0.163499	0.128733	0.117476	0.523134	0.434375	0.3373	Cx3cr1	none	none
ENSMUSG00000014164	Klhl3	1764	26.2135	23.5321	22.3623	28.3654	28.2247	29.2913	12.0554	8.3024	7.00848	3.45306	2.54946	2.87871	9.10253	6.85571	7.23378	4.64593	4.88885	3.33943	1.98565	3.12609	NA	NA	NA	2.79494	1.5656	0	0	0	0	none	none	none
ENSMUSG00000014177	Tvp23b	618	49.9954	58.1161	73.433	49.9412	72.2474	72.8587	75.7031	87.4573	85.475	229.98	234.016	234.638	68.4979	73.7904	59.8367	5.94286	6.04474	6.39023	7.86961	6.0954	10.2519	10.3781	11.0399	3.86196	4.51812	1.79682	1.15794	1.96387	1.97509	none	none	none
ENSMUSG00000014195	Dnajc7	1485	155.692	151.313	161.028	139.187	145.358	155.084	158.24	143.707	150.989	72.4653	66.3071	64.3383	85.7152	79.5713	91.0142	7.29472	7.20499	7.24772	6.10231	6.43352	13.9904	14.0197	13.9409	5.87578	6.04731	2.06688	2.34309	2.24839	2.38114	none	none	none
ENSMUSG00000014198	Zfp385c	1290	0	0	0	0	0	1.14441	72.5341	74.0651	53.1459	0.174883	0.733945	0.29159	0.452625	0.195308	0.807492	0	0.466203	6.07856	0.485571	0.570601	NA	NA	NA	2.36177	1.70487	0.41786	0.298236	0.14576	0.243769	PV	none	none
ENSMUSG00000014226	Cacybp	690	135.858	134.969	145.201	150.455	167.59	193.629	157.181	212.253	251.657	133.071	109.43	111.21	50.7727	54.7712	53.2155	7.12594	7.42255	7.70065	6.89365	5.75274	13.2452	13.2333	13.4773	4.76235	4.55786	2.54702	1.41586	2.0041	2.22269	none	none	none
ENSMUSG00000014232	Cluap1	1242	18.4462	20.4894	26.4206	22.2144	22.5006	30.3102	30.8198	16.2839	18.0983	17.9826	13.9122	13.7801	12.9282	12.3742	14.2579	4.51004	4.7009	4.50678	4.02014	3.82648	10.8674	11.0783	10.8139	3.6017	4.10378	0.656757	0.795705	1.11902	0.891433	none	none	none
ENSMUSG00000014243	Zswim7	459	12.3638	14.5486	19.0136	5.09402	6.29833	1.60815	9.2661	6.83727	12.243	16.7111	11.345	9.83401	2.54416	6.03795	4.53885	4.02757	2.41508	3.38526	3.76872	2.4259	10.6765	10.2954	11.361	3.20163	3.2459	1.32413	0.870797	1.06843	0.792467	none	none	none
ENSMUSG00000014245	Pigl	759	3.32308	3.32903	4.1394	1.23223	3.80887	5.83511	1.4009	9.18842	2.96154	3.26956	1.87113	1.98235	2.30785	1.99168	1.71552	2.20075	2.20958	2.46387	1.75461	1.58737	9.44019	9.37071	9.00098	2.02148	1.38589	0.00764768	0.0171146	0.0311721	0.0523484	none	none	none
ENSMUSG00000014294	Ndufa2	300	268.336	268.917	242.035	274.344	276.245	172.233	503.288	455.636	393.367	392.543	402.386	440.723	321.137	300.657	304.687	8.02659	7.91851	8.81942	8.68959	8.27532	13.3918	13.6186	14.3237	6.58105	6.78877	7.71095	8.41814	5.86428	5.9124	none	none	none
ENSMUSG00000014301	Pam16	378	0	0	0	0	0.849775	0	0	0	0	0	0.626184	0.995108	0	0	0	0	0.359812	0	0.623334	0	10.2487	10.6704	10.9458	0.910733	0.665999	2.9942	2.44364	1.837	1.89122	none	none	none
ENSMUSG00000014303	Glis2	1566	1.07374	0.691499	0.222918	2.68753	0.615354	0	0	2.00403	2.51192	5.04214	3.4764	6.24516	0	0.321772	0	0.733544	1.07105	1.32499	2.5659	0.14699	7.96255	7.75176	8.51133	1.79077	2.40236	0.512781	0.180935	0.0806992	0.0461229	none	none	none
ENSMUSG00000014313	Cox6c	231	414.91	479.721	386.869	398.802	325.387	428.186	1031.06	870.997	839.28	389.672	337.114	530.031	132.701	122.156	121.753	8.74203	8.58918	9.83728	8.71404	6.98341	14.9411	15.2912	16.2392	7.74362	7.52758	5.02416	4.69694	3.27922	3.54466	none	none	none
ENSMUSG00000014329	Bicc1	2934	0.0716376	0.430596	0.118981	0.318767	0.21896	0	1.4496	0.594241	0.766125	1.61472	1.04876	1.28204	0.0995034	0.343487	0.177516	0.271511	0.23786	0.953568	1.21112	0.271229	NA	NA	NA	0.748461	0.736966	0.0532335	0.0306038	0	0	none	none	none
ENSMUSG00000014349	Ube2z	1071	96.5554	92.8526	86.7018	86.0162	77.3795	95.1107	123.107	80.7449	84.4766	41.0756	41.1071	35.9995	89.6818	65.6333	66.8669	6.53973	6.44574	6.60154	5.33607	6.22999	12.4609	12.6918	12.6438	4.87184	4.75951	2.52777	2.84875	1.55214	1.60989	none	none	none
ENSMUSG00000014351	Gip	435	0	0	0	0	0	0	0	0	0	0	0	0	0	0	0	0	0	0	0	0	NA	NA	NA	0	0	0	0	0	0	none	none	none
ENSMUSG00000014353	Tmem87b	1668	31.1245	33.5427	35.16	48.5013	50.0695	58.4141	29.9607	43.065	59.2948	23.3985	23.6981	16.0112	18.7277	19.6362	21.3891	5.09912	5.73683	5.49527	4.46179	4.38665	10.922	10.3695	10.4633	3.11103	2.48199	0.740125	0.475127	0.793496	1.69581	none	none	none
ENSMUSG00000014355	Anapc1	5835	18.1187	17.7543	16.6917	23.8023	24.8274	24.668	15.4891	15.956	14.8313	15.9292	15.1713	14.5368	15.3601	12.1332	10.8897	4.21113	4.66861	4.03786	4.01903	3.78601	9.30566	9.45421	9.38269	3.23266	3.1088	0.51285	0.447011	0.481843	0.586328	none	none	none
ENSMUSG00000014361	Mertk	2985	1.97158	1.02787	0.818634	0.783302	1.0761	0.989135	1.06863	0.934541	0.376518	85.1006	84.6084	99.9919	343.681	374.587	316.338	1.1844	0.963112	0.84256	6.50621	8.43408	4.40372	7.26311	7.80641	3.19849	5.45198	0.0173409	0.0504433	0.281438	0.784723	Cx3cr1	none	none
ENSMUSG00000014402	Tsg101	1176	51.8312	60.3139	55.8067	60.8398	58.7255	63.3948	60.5783	51.0004	57.82	31.4612	29.3859	24.7889	49.4019	37.9206	40.9668	5.83248	5.95389	5.84464	4.88486	5.45164	13.2461	13.35	13.3134	4.12102	4.07553	1.57124	2.05747	1.79376	1.76779	none	none	none
ENSMUSG00000014418	Hps5	3381	0.621664	0.640572	0.413001	0.829869	0.570035	0.436641	1.25795	0.825083	0.332418	7.74018	8.611	8.62221	13.2113	12.5936	11.7076	0.640077	0.689014	0.85212	3.22102	3.75533	8.39694	8.75364	9.13542	1.85599	2.47335	0.248446	0.397919	0.591194	0.932558	none	none	none
ENSMUSG00000014426	Map3k4	4794	10.7416	9.56242	6.55361	11.0226	9.84952	11.8558	13.7513	12.2925	10.3154	4.79999	6.3692	7.10089	9.13463	7.88321	10.4297	3.31507	3.57402	3.71367	2.82579	3.34329	10.8271	11.2334	11.0052	3.19535	2.84398	0.37666	0.424814	0.337412	0.46948	none	none	none
ENSMUSG00000014444	Piezo1	7644	0.302463	0.141665	0.137005	0	0	0	0	0.0456176	0.0735155	0.236106	0.278686	0.295252	3.09359	3.8893	3.91783	0.255454	0	0.0561826	0.344845	2.21212	NA	NA	NA	0.443607	0.539366	0.154021	0.566311	0.773967	1.11586	Cx3cr1	none	none
ENSMUSG00000014453	Blk	1500	0	0	0	0	0	0	0	0	0	0	0	0	0	0	0	0	0	0	0	0	NA	NA	NA	0	0	0	0	0	0	none	none	none
ENSMUSG00000014470	Rnf166	714	16.1907	11.3749	11.7341	5.89451	8.09786	12.4057	14.8919	14.6513	12.5928	8.53108	11.6028	10.5364	22.8975	25.7593	22.2484	3.81761	3.29269	3.91124	3.48844	4.62264	10.4401	10.59	10.1339	3.73335	3.24894	3.17681	4.44975	3.43818	4.24622	none	none	none
ENSMUSG00000014496	Ankrd28	3252	23.2677	23.3094	21.5765	23.5829	19.7549	23.833	10.1359	6.96972	8.98571	15.8863	13.902	13.3018	4.30912	3.40888	4.08402	4.5679	4.54784	3.27755	3.94142	2.30276	11.7357	11.7368	10.9541	3.1177	2.87316	0.0765065	0.00953066	0.0189361	0.0723804	none	none	none
ENSMUSG00000014498	Ankrd52	3231	18.4099	16.0316	14.3698	9.26289	13.5207	10.509	29.2889	19.8579	13.2183	7.47111	7.69212	10.1285	8.04176	6.94005	4.51356	4.11023	3.59664	4.44549	3.23734	2.90659	NA	NA	NA	3.75061	2.98307	0.279493	0.114446	0.0519758	0.426683	none	none	none
ENSMUSG00000014503	Pkd2l2	1866	0.337917	0	0.187079	0	0.344282	0	0.56982	0	1.20461	0.2418	1.14163	0.806326	0.469361	0.13502	0.279117	0.232659	0.156734	0.670368	0.790703	0.372394	NA	NA	NA	2.89142	1.72828	0	0	0	0	none	none	none
ENSMUSG00000014504	Srp19	435	89.3889	101.65	117.166	98.9013	107.81	111.994	46.4423	100.201	108.515	96.9819	106.65	72.2037	72.4824	59.6565	53.2806	6.69676	6.74463	6.42715	6.53831	5.97284	12.9168	13.0067	13.0571	4.78346	4.64078	4.43118	4.68067	3.94086	3.8407	none	none	none
ENSMUSG00000014529	Tmbim7	909	0	0	0	0	0	0	0	0	0	0	0	0	0	0	0	0	0	0	0	0	NA	NA	NA	0	0	0	0	0	0	none	none	none
ENSMUSG00000014542	Clec4f	1647	0.127617	0	0	0	0	0	0	0	0	0	0	0	0	0	0	0.0601012	0	0	0	0	NA	NA	NA	0	0	0	0	0	0.0508792	none	none	none
ENSMUSG00000014543	Klra17	822	0	0	0	0	0	0	0	0	0	0	0	0	0	0	0.316808	0	0	0	0	0.144833	NA	NA	NA	0	0	0	0	0	0	none	none	none
ENSMUSG00000014547	Wdfy2	1203	3.84378	3.15054	2.03127	5.44209	5.07322	3.06792	13.2579	7.53634	7.94114	10.8768	11.0183	13.2888	35.1885	32.0432	34.6356	2.00307	2.46669	3.40306	3.66993	5.12746	NA	NA	NA	2.20789	1.72538	0.00539491	0.0109765	0.0132176	0.0567725	none	none	none
ENSMUSG00000014550	Rbsn	2352	23.1453	20.1814	21.8181	19.6834	21.1685	20.3993	11.3019	11.8606	13.3798	10.6469	10.4662	10.7951	11.2954	11.0334	10.2971	4.50557	4.42069	3.72036	3.54053	3.56989	11.8163	11.8964	11.6573	3.77189	3.68631	1.38686	1.22	1.23373	1.20822	none	none	none
ENSMUSG00000014551	Mrps25	516	39.9188	44.7705	58.1815	74.3135	50.4233	70.0949	80.3645	79.7416	81.6792	66.4557	61.4679	61.2339	31.6837	34.1789	36.8418	5.60358	6.04317	6.35041	6.00118	5.13893	12.9219	13.1118	13.2002	3.95606	3.80254	2.98344	2.2911	1.76642	1.65977	none	none	none
ENSMUSG00000014554	Dguok	834	11.8449	11.0366	9.62715	14.0177	17.3317	25.6668	22.9486	17.5605	12.8023	13.7957	13.9067	13.3051	62.6592	38.064	54.0192	3.56514	4.32232	4.23039	3.87471	5.71646	9.86477	10.7165	10.0523	2.76553	2.96471	2.76292	3.90886	4.13931	4.00523	Cx3cr1	none	none
ENSMUSG00000014592	Camta1	5049	62.152	55.0487	54.8973	71.0384	72.5263	73.6826	51.8059	43.8552	46.3007	13.1812	9.89169	6.74226	5.95566	10.4292	6.963	5.86706	6.19802	5.59457	3.45133	3.13465	15.693	15.986	16.0126	5.34908	4.09649	0.483394	0.122616	0.0217096	0.0144065	none	none	none
ENSMUSG00000014599	Csf1	1659	10.3889	8.81192	7.15433	8.45626	5.80859	8.00877	3.20459	1.89169	7.11333	31.6846	38.6649	32.4229	16.3657	15.6423	11.9299	3.29058	3.0746	2.34195	5.13986	3.96772	9.24156	8.78816	7.59492	2.58496	3.42761	1.14757	1.15843	1.58529	1.59551	none	none	Micro_1
ENSMUSG00000014601	Strip1	2514	34.6127	29.5777	28.4659	29.7617	31.0482	27.5996	30.0291	23.4409	17.6588	23.242	23.0672	23.7152	20.2061	16.0348	16.5738	4.99483	4.92931	4.627	4.60534	4.21761	14.1295	14.4589	13.5109	4.56925	4.80735	2.92852	2.58083	2.60582	2.16896	none	none	none
ENSMUSG00000014602	Kif1a	5376	319.538	289.421	271.687	235.555	247.902	209.113	235.362	199.776	143.415	93.0347	92.0196	94.9473	21.6676	35.805	23.9781	8.20236	7.85709	7.59881	6.5597	4.81508	16.4287	15.6996	16.7286	7.25229	6.7046	3.29447	1.96678	0.499665	0.161817	none	none	none
ENSMUSG00000014603	Alx3	1032	0.203667	0	0	0	0	0	0	0	0	0.437209	0	0.182244	0	0	0	0.0947618	0	0	0.270809	0	NA	NA	NA	0.111031	0.0285692	0.0777275	0.120097	0.0808632	0	none	none	none
ENSMUSG00000014606	Slc25a11	945	119.438	114.782	99.7397	96.9901	102.653	106.23	149.647	122.875	77.3057	67.3218	75.3925	91.3509	96.0785	90.1145	101.135	6.81147	6.68591	6.87786	6.30418	6.59658	12.954	13.2822	13.7105	5.80529	5.85782	5.41755	6.37547	5.93969	6.13937	none	none	none
ENSMUSG00000014609	Chrne	1485	0	0	0	0	0	0	0	0	0	0	0	0	0	0	0	0	0	0	0	0	NA	NA	NA	0.0285692	0.00958605	0.0957552	0	0	0	none	none	none
ENSMUSG00000014633	Cmc2	300	41.3363	40.9091	48.8725	23.3816	26.7679	41.828	102.784	87.1752	108.644	33.0879	33.9266	28.8382	34.06	26.0346	19.0972	5.48239	4.98455	6.65155	5.04225	4.77596	11.3873	10.6222	12.6254	3.11103	2.42939	3.74848	3.41111	2.15578	1.60206	none	none	none
ENSMUSG00000014668	Chfr	1995	7.48025	5.33754	5.94939	5.86004	5.47434	4.06996	4.79677	4.1949	4.78857	2.37473	2.72884	1.4141	10.2436	9.47171	7.70153	2.85912	2.61701	2.48373	1.66565	3.34184	11.97	11.6211	11.6178	2.91073	2.32577	0.31911	0.515439	0.330748	0.543925	none	none	none
ENSMUSG00000014686	Ceacam16	1281	0	0	0	0	0	0	0	0.544419	0	0	0	0	0	0	0	0	0	0.240587	0	0	NA	NA	NA	0.678072	0.214125	0	0.0374713	0	0.0640893	none	none	none
ENSMUSG00000014704	Hoxa2	1119	0	0	0	0	0	0	0	0.311618	0	1.00804	0.211526	0.672298	0	0	0.232722	0	0	0.142574	0.705422	0.107787	NA	NA	NA	0	0	0.453612	0.131634	0	0	none	none	none
ENSMUSG00000014725	Adam28	2382	0	0	0	0	0	0	0	0	0	0	0	0	0	0	0	0	0	0	0	0	NA	NA	NA	0	0	0	0.0196707	0	0.0231737	none	none	none
ENSMUSG00000014747	Ankrd53	1494	0	0	0	0	0	0	0	0	0	0	0	0	0	0	0	0	0	0	0	0	NA	NA	NA	0.604071	0.146221	0	0	0	0	none	none	none
ENSMUSG00000014748	Tex261	591	9.95799	11.2992	8.86013	30.8589	17.9359	11.2407	25.1878	97.353	72.2647	32.8284	42.4533	48.6896	82.9888	90.3771	70.0612	3.46455	4.39313	6.04298	5.4034	6.36005	11.1883	11.0396	10.9352	4.30743	4.28983	4.62654	5.52603	5.51659	4.94226	none	none	none
ENSMUSG00000014763	Fam120b	2361	32.0485	30.9593	28.0927	38.2265	37.686	36.5788	27.4716	32.4922	25.7056	12.5174	9.52404	12.9048	14.7146	14.2994	12.3535	4.97117	5.26668	4.8854	3.66092	3.88647	12.2144	12.6888	12.5033	3.98732	3.24082	1.27028	0.878526	1.34674	1.83417	none	none	none
ENSMUSG00000014767	Tbp	951	32.4891	32.4525	38.91	27.0449	30.0611	32.5993	26.8337	41.4334	34.2726	27.7552	17.9203	20.7654	22.7169	16.6905	13.9655	5.1545	4.94962	5.13668	4.53275	4.23197	11.0526	11.0578	10.7632	3.14078	2.81421	0.188161	0.241555	0.567864	0.774713	none	none	none
ENSMUSG00000014769	Psmb1	723	327.341	319.774	330.258	307.226	332.322	374.686	350.016	370.404	331.886	264.292	244.882	273.139	213.203	172.147	186.578	8.35223	8.40547	8.45848	8.03216	7.58227	14.8626	15.0762	14.9669	6.43962	6.80718	4.33034	4.56498	3.90261	3.29874	none	none	none
ENSMUSG00000014771	Pdcd2	1032	10.1834	12.5917	13.5306	13.5939	13.6952	20.0271	9.27283	16.2186	20.6921	11.586	4.58716	7.47199	13.2958	12.2068	9.08429	3.7117	4.06799	4.03514	3.15084	3.6472	10.0733	10.6554	10.7331	3.14078	3.30354	1.9117	1.78582	2.43468	2.41725	none	none	none
ENSMUSG00000014773	Dll1	2169	0.678328	0.915304	0.643779	1.29359	1.92522	2.72252	0	1.44689	2.33175	0.936098	0.218255	0.260132	0.538392	0.929266	0.600314	0.803891	1.57552	1.17603	0.557283	0.756446	7.99165	8.53773	8.35571	1.1375	0.831877	0.307948	0.207535	0.267857	0.0682996	none	none	none
ENSMUSG00000014776	Nol3	663	43.1148	35.9329	37.9101	23.9811	19.3795	20.0401	48.1124	42.0755	33.056	19.7357	24.2767	30.9204	1.76134	1.52004	3.14228	5.32142	4.46816	5.39511	4.6992	1.65133	10.7958	10.4383	11.9506	3.68257	3.23981	2.71331	0.86531	0.584793	0	none	OL	none
ENSMUSG00000014778	Fhod1	3594	0.116964	0.0502174	0	0	0.0893753	0	0	0.097023	0	1.19265	0.263436	0.889617	16.6523	14.7215	20.2884	0.0782371	0.0423527	0.0459196	0.833418	4.18751	NA	NA	NA	0.956057	0.847997	0.103173	0.23796	1.04755	1.39209	Cx3cr1	none	none
ENSMUSG00000014782	Plekhg4	3654	0	0	0	0	0	0	0	0	0	0	0.194333	0	0	0	0	0	0	0	0.0905521	0	NA	NA	NA	0.400538	0.0749621	0.0588086	0.0369415	0	0	none	none	none
ENSMUSG00000014786	Slc9a5	2697	8.26087	7.42804	9.57827	3.81457	4.16853	1.91583	9.46193	9.30903	6.66759	1.50567	0.877632	0.906556	0.649484	0.653923	0.386231	3.23609	2.10422	3.24481	1.06807	0.644514	11.163	9.22977	9.87856	2.64155	1.81284	1.75045	0.77971	0.10051	0.489661	none	none	none
ENSMUSG00000014791	Elmo3	2163	0.0971727	0	0	0	0	0	0.983157	0.322423	0.259802	1.14729	0.875441	0.869512	0.134971	0	0.240792	0.0459893	0	0.605773	0.973855	0.170251	NA	NA	NA	0.678072	0.879706	0.470516	0.181497	0	0.112194	none	none	none
ENSMUSG00000014813	Stc1	744	6.21514	7.76263	7.9765	2.51415	2.1587	6.94488	1.42915	1.87473	2.26594	1.51613	2.22699	0.505579	1.17719	0	0.700044	3.05625	2.28469	1.5143	1.27276	0.7011	9.46462	8.48415	7.70097	0.847997	0.294743	0.515232	0.050592	0.168881	0	none	none	none
ENSMUSG00000014837	4931428F04Rik	1404	8.08402	6.94158	9.44828	5.99527	5.71964	3.68019	17.4185	10.9279	8.80553	2.41025	2.19164	2.14331	0.623809	2.1534	0.556445	3.19503	2.61629	3.74244	1.69973	1.07807	11.4741	11.2761	11.68	3.49313	2.63691	2.15773	1.36749	0.971531	0.89488	none	none	none
ENSMUSG00000014846	Tppp3	531	28.8954	30.59	40.1025	12.3293	10.8886	9.73068	106.128	70.9222	136.52	113.012	106.982	121.842	12.6454	19.928	7.35639	5.09576	3.5829	6.72142	6.8448	3.83894	11.9846	10.7346	10.5463	5.28318	5.89901	6.42693	4.52271	2.63572	1.91864	none	OL	Olig
ENSMUSG00000014850	Msh3	3288	8.31022	8.4532	7.11343	11.3779	9.18315	12.5718	6.79105	5.93894	4.27276	1.98978	2.37561	2.23082	4.26194	2.37542	2.53446	3.16333	3.59027	2.73716	1.6775	2.02051	9.3928	9.39253	9.45583	2.5656	2.03328	0.0892335	0.0185714	0.028765	0.0626364	none	none	none
ENSMUSG00000014852	Adamts13	4281	0.441874	0.295111	0.570807	0	0.225098	0.862114	0	0	0	0.263489	0.0552902	0	0	0	0	0.521986	0.446155	0	0.14569	0	NA	NA	NA	0.263034	0.119909	0.0809437	0.0259108	0	0.016539	none	none	none
ENSMUSG00000014856	Tmem208	531	31.6662	34.3288	46.0193	27.3005	29.0364	30.5822	58.0702	67.6387	63.4975	71.801	85.5855	83.5891	50.0316	58.3607	62.2841	5.26071	4.90559	6.00155	6.34563	5.8553	10.8642	10.6428	11.5478	4.33771	5.11159	3.27758	4.42102	4.0807	3.96175	none	none	none
ENSMUSG00000014859	E2f4	1233	9.71656	9.51442	9.90926	12.8949	5.99184	5.3879	6.03649	8.20139	13.6728	6.22091	5.18315	9.15209	18.2316	14.7123	18.3749	3.42135	3.18453	3.36507	2.97307	4.17842	11.498	11.8289	11.628	3.75275	3.3627	2.46926	3.74051	3.52075	3.55143	none	none	none
ENSMUSG00000014867	Surf4	810	80.96	74.8663	69.8178	95.8355	79.3123	64.7013	144.397	109.776	112.391	125.055	151.662	162.999	203.639	241.994	221.836	6.252	6.33895	6.94472	7.20527	7.80406	13.5208	13.1383	12.6003	4.8268	5.50737	2.96574	4.17491	4.18982	3.92877	none	none	none
ENSMUSG00000014873	Surf2	774	48.337	43.8378	40.5917	40.4797	36.1056	49.5909	26.1013	38.294	36.3019	23.9007	26.9113	23.5702	27.9118	28.6452	27.2529	5.50002	5.42823	5.11127	4.68897	4.85483	11.3575	11.8324	12.0291	4.04264	3.76553	2.75522	3.2913	3.1927	4.22919	none	none	none
ENSMUSG00000014905	Dnajb9	669	130.384	119.511	137.757	127.218	161.808	162.193	227.279	200.672	362.035	313.614	292.599	220.686	164.954	149.135	162.322	7.02478	7.24228	8.04619	8.11183	7.32016	9.87253	9.26401	10.3515	4.14893	4.42582	2.18073	2.26259	3.80176	3.97013	none	none	none
ENSMUSG00000014907	Naf1	1794	11.3645	10.6639	12.6482	9.64456	6.80388	9.05191	4.14882	6.21986	12.2164	22.1324	21.6379	16.0399	7.81118	6.88151	6.8225	3.65063	3.24795	3.09227	4.38796	3.03064	11.2382	10.8316	10.4834	2.17632	2.64	0.284729	0.176796	0.6561	0.666976	none	none	none
ENSMUSG00000014932	Yes1	1626	2.45603	3.21891	3.86445	1.43798	4.14853	3.63169	7.19319	8.79258	7.6033	30.8014	28.2406	29.1482	22.4433	14.1004	15.5353	2.06343	2.026	3.1478	4.92585	4.19847	8.34997	8.2783	10.7648	2.05658	2.7866	0.141943	0.0285704	0.197108	0.34465	none	none	none
ENSMUSG00000014956	Ppp1cb	984	556.434	585.647	653.123	671.507	755.051	818.407	463.566	595.697	599.074	595.867	509.236	549.318	260.79	266.03	249.036	9.22738	9.54944	9.11317	9.10976	8.02025	15.0667	15.2399	14.875	6.02281	5.6745	0.840228	0.23215	0.446484	0.701166	none	none	none
ENSMUSG00000014959	Gorasp2	1356	71.9216	81.9885	56.6369	72.7656	80.3037	71.3102	53.3211	54.0023	60.0908	31.7769	29.6744	27.0462	46.9348	49.7949	42.4425	6.15345	6.244	5.82794	4.9307	5.56653	13.8212	14.1016	13.2807	5.59036	5.29572	2.33687	2.07048	2.52987	1.91153	none	none	none
ENSMUSG00000014980	Tsen15	507	13.6807	13.8832	10.3281	11.9905	20.2739	20.3826	27.2637	11.0044	22.1678	14.684	4.66859	10.7578	8.63736	8.94488	5.13642	3.76878	4.21327	4.40226	3.46425	3.09978	9.62567	9.91173	9.79461	2.4489	2.58976	4.04949	3.47995	3.71952	3.24701	none	none	none
ENSMUSG00000015001	Oc90	1458	0	0	0	0	0	0	0	0	0	0	0	0	0	0	0	0	0	0	0	0	NA	NA	NA	0	0	0	0	0	0	none	none	none
ENSMUSG00000015002	Efr3a	2541	63.2787	62.5043	54.1287	74.7179	84.823	88.3098	133.486	144.228	118.096	29.8314	24.8714	28.0522	36.7657	36.2899	34.2302	5.93004	6.38572	7.0546	4.83719	5.20014	13.6249	14.5332	15.1918	5.23189	4.09424	1.75819	0.534757	1.0499	0.962319	none	none	none
ENSMUSG00000015013	Trappc2l	420	139.122	158.566	162.077	169.238	195.023	147.628	108.86	128.687	119.08	91.8513	67.6278	76.1258	118.862	113.376	116.567	7.26917	7.42316	6.9054	6.31352	6.87367	12.8236	13.1424	12.944	5.5404	4.90977	4.60904	4.44148	3.32682	3.37646	none	none	none
ENSMUSG00000015016	Acsf3	1752	6.35832	6.07785	5.18054	6.67282	7.15033	6.31971	3.64139	12.5389	8.01873	9.52875	6.61996	12.9892	5.16566	5.89603	6.24286	2.78078	2.94753	3.18052	3.42124	2.75877	10.0276	10.1722	10.9911	3.13422	3.76341	1.04083	0.863148	0.784017	0.642024	none	none	none
ENSMUSG00000015023	Ddx19a	1437	8.92224	7.53575	8.98837	12.366	12.2942	19.5194	17.0185	18.6847	12.5139	21.5081	18.6129	23.1659	21.5351	19.9875	26.096	3.24521	3.97513	4.09359	4.46569	4.55701	11.2839	11.6133	11.2919	2.65535	3.28491	0.452605	1.19611	0.961791	0.995035	none	none	none
ENSMUSG00000015027	Galns	1563	10.758	8.42938	7.14706	9.87321	9.24803	9.91745	6.12256	5.35433	8.98837	6.9282	8.17764	7.58078	20.733	18.6986	14.1621	3.28956	3.41678	2.96749	3.09798	4.23761	9.31326	8.71722	9.51292	1.82375	1.57208	0.135721	0.668338	0.96613	0.926726	none	none	none
ENSMUSG00000015053	Gata2	1443	0	0	0	0	0	0	0	0.4833	0	0	0	0.260673	0.202317	0.523799	0	0	0	0.215492	0.120207	0.31271	NA	NA	NA	0.505891	0.0840643	0.465368	0.28898	0.189711	0.151193	none	none	none
ENSMUSG00000015083	C8g	609	1.38052	0.296357	1.14643	0.767867	1.05489	1.21206	0	2.29032	2.76824	0.740886	4.66399	2.16179	0	1.65483	0.427613	0.956878	1.00835	1.42556	1.81649	0.760559	NA	NA	NA	0.863938	0.900464	0.638283	0.676785	0.395716	0	none	none	none
ENSMUSG00000015085	Entpd2	1488	0.706266	0.363873	0.234603	0.314268	0	0	0	0.468684	0.377656	60.7967	59.3334	63.8294	0.392396	0.846597	0.350022	0.520964	0.143728	0.358524	5.96162	0.613222	NA	NA	NA	2.50589	5.66069	1.92635	0.581686	0	0	GFAP	AS	none
ENSMUSG00000015087	Rabl6	2178	34.3552	33.3948	25.6447	35.6413	34.3632	32.8741	30.7562	24.8157	22.4471	14.5014	14.6713	12.3484	17.0233	19.6653	19.4894	5.00592	5.1413	4.75523	3.89145	4.30203	14.2934	14.5723	14.1656	5.4614	4.91233	6.48481	5.68324	4.41007	4.48918	none	none	none
ENSMUSG00000015090	Ptgds	570	173.679	192.197	202.104	13.1265	22.5414	27.1947	249.965	271.619	225.767	470.593	504.124	247.468	333.942	402.674	467.836	7.57233	4.45642	7.96646	8.67382	8.65279	8.72341	9.42938	12.1498	8.87799	8.264	9.148	7.66447	5.6422	2.59236	none	none	EndoSM
ENSMUSG00000015092	Edf1	447	180.091	170.387	174.154	229.108	177.495	102.382	394.866	324.518	295.434	195.823	211.28	187.234	233.162	197.838	183.515	7.45843	7.41499	8.4063	7.63744	7.68537	14.2335	14.4166	14.4162	6.58767	7.11138	7.00233	7.31711	6.85958	5.79626	none	none	none
ENSMUSG00000015093	Clic3	714	0	0	0	0	0	0	0	0	0	0.315966	0	0.263411	0.408884	0	0	0	0	0	0.254746	0.184337	NA	NA	NA	0.545968	0.532733	0.593323	0.149795	0	0	none	none	none
ENSMUSG00000015094	Npdc1	1026	165.116	167.112	165.358	228.346	182.836	172.665	180.323	173.671	159.384	68.1636	75.6693	72.7738	9.67452	13.2604	11.1679	7.38251	7.61188	7.42732	6.19382	3.6285	13.9455	13.9381	13.118	6.88166	6.39541	5.92676	4.70634	2.52741	0.758235	none	none	none
ENSMUSG00000015095	Fbxw5	1722	25.022	20.2281	22.2995	18.7378	15.296	18.0035	14.2018	17.2123	6.85308	12.0529	12.7833	15.7276	5.08611	6.7303	4.99056	4.5556	4.19737	3.78196	3.8601	2.72297	13.5494	13.575	13.5818	4.99639	4.82612	5.35069	4.35605	3.72639	3.73779	none	none	none
ENSMUSG00000015112	Slc25a13	2031	0.413953	0.533179	1.03128	0.230247	0.316312	0	2.61764	3.43378	3.87363	0.999703	1.04888	1.01863	5.60599	2.97722	3.46196	0.730724	0.241457	2.10714	1.01607	2.32627	5.44644	5.79268	10.435	0.970854	0.925999	0.00514346	0.0110023	0.0277658	0.0388876	none	none	none
ENSMUSG00000015120	Ube2i	477	7.49086	7.56735	4.39106	10.7839	2.69363	7.73734	8.91643	2.19309	2.3562	3.78364	3.47355	5.91432	8.56855	11.092	13.6487	2.90363	3.01286	2.45643	2.43042	3.5973	14.8283	15.1645	14.3416	2.74846	2.35802	2.57945	2.2583	2.39938	2.16807	none	none	none
ENSMUSG00000015126	Tsr3	972	12.1094	13.369	14.3658	13.952	10.2445	15.1881	18.5965	16.861	6.93769	9.98023	11.6888	13.5445	5.40635	7.51695	5.8942	3.83606	3.8205	3.91951	3.67105	2.86245	10.5897	10.817	11.0026	3.42492	3.65382	4.2159	3.90479	4.31778	3.63203	none	none	none
ENSMUSG00000015127	Unkl	2184	7.89155	6.5284	5.75421	5.78115	3.52983	6.08359	7.30278	3.51255	2.83035	3.82197	4.55187	4.47799	3.34184	3.23009	2.02705	2.94948	2.61625	2.47211	2.40162	1.95096	10.4399	10.3255	10.4414	2.25701	1.67506	0.616788	0.211629	0.272033	0.177294	none	none	none
ENSMUSG00000015133	Lrrk1	6045	0.06954	0.0298563	0.0577484	0.0773583	0	0	0	0.115368	0	0.22392	0.352403	0.311126	10.6732	12.0034	14.4317	0.0736579	0.0367299	0.0544402	0.373861	3.74087	NA	NA	NA	0.356144	0.47854	0.0781545	0.424083	0.774514	0.634897	Cx3cr1	none	none
ENSMUSG00000015134	Aldh1a3	1539	0.136572	0.70363	0.453657	0.303854	0.208717	0.479624	0.690893	1.58603	1.09542	0.146588	0.615198	0.122206	0	0.327417	0.338423	0.517313	0.41222	1.08686	0.372578	0.289181	7.57115	6.83241	3.58181	0.464668	0.341037	0.0129792	0	0	0	none	none	none
ENSMUSG00000015143	Actn1	2679	58.3715	52.8172	44.9555	53.5882	47.3609	48.7686	7.54103	5.9874	4.61477	5.55789	5.12447	5.19507	15.8013	15.3294	13.9977	5.72923	5.66976	2.81716	2.65363	4.00386	13.2942	12.4952	10.8788	3.79286	3.18057	2.98822	1.31054	1.06159	0.770697	none	none	none
ENSMUSG00000015149	Sirt2	1170	38.444	28.5376	28.0465	28.7773	28.5524	27.7592	78.156	51.56	26.4166	126.104	154.561	194.988	144.474	137.387	151.13	5.03016	4.87593	5.72912	7.31788	7.18319	11.9061	11.9795	12.7003	6.10685	7.41577	3.28454	4.19625	3.26686	3.10083	none	OL	Olig
ENSMUSG00000015165	Hnrnpl	1846	135.037	130.912	129.348	152.499	145.121	128.755	85.8231	80.8472	60.5789	68.682	75.6508	83.8495	143.125	134.982	138.531	7.05274	7.16113	6.26209	6.26792	7.12804	13.6399	13.8064	13.5815	5.84348	6.22059	2.64489	2.58397	2.26958	1.64699	none	none	none
ENSMUSG00000015176	Nolc1	2109	45.6446	46.0403	52.1399	58.7588	52.3935	40.2496	36.2999	42.1615	50.8928	22.2498	24.9155	18.7273	44.5735	33.6886	37.414	5.61299	5.68558	5.4633	4.52131	5.30592	13.2604	13.4971	12.9067	4.11103	4.09761	3.30135	3.57108	2.70381	2.70213	none	none	none
ENSMUSG00000015189	Casd1	2394	50.7463	53.4508	48.8491	57.0377	51.6574	58.891	19.5424	32.3357	43.6605	26.2917	22.3449	15.0837	17.6824	25.3631	20.9943	5.70087	5.82939	5.03765	4.47509	4.48198	11.3233	10.7031	10.6921	4.34908	3.74057	0.691398	0.265419	1.22258	1.42613	none	none	none
ENSMUSG00000015202	Cnksr3	1668	0.75606	0.541011	0.209286	0	0	0	9.56191	7.73497	14.8237	7.57409	8.7981	8.56939	7.00103	5.73981	4.996	0.586999	0	3.54928	3.21938	2.78916	NA	NA	NA	2.79909	3.18375	0.180886	0.121884	0.098482	0.167751	none	none	Olig
ENSMUSG00000015214	Mtmr1	2016	26.0646	28.4688	32.5539	42.9126	45.5692	51.2599	11.0759	19.8912	16.446	20.7023	13.9717	16.7925	13.0332	8.87315	10.5923	4.90829	5.5723	4.07076	4.18234	3.56473	11.9491	12.4487	11.1354	3.27202	3.10992	0.542625	0.402481	0.380446	0.562408	none	none	none
ENSMUSG00000015217	Hmgb3	603	2.43995	2.39444	1.73676	0.775508	1.06539	1.22412	0	4.04794	2.79578	4.86367	3.14026	3.7428	0.484151	0	0.431868	1.67373	1.01555	1.71424	2.29736	0.384425	13.0842	11.8254	12.7846	1.41143	1.67807	2.65618	1.23044	0	0.494192	none	none	none
ENSMUSG00000015222	Map2	5970	498.282	564.117	672.859	650.297	627.903	643.432	248.1	312.838	442.314	190.645	183.371	100.37	38.4367	42.2866	38.1682	9.17846	9.3254	8.38981	7.31405	5.34449	14.1387	14.0353	13.2219	6.72574	6.12956	1.88411	0.700754	0.211638	0.0582911	none	none	none
ENSMUSG00000015224	Cyp2j9	1509	3.76076	2.39206	3.00739	0	0.425732	0.978319	3.52314	3.92837	4.84121	459.87	435.435	537.679	3.48242	4.17408	4.14181	2.01913	0.553869	2.34981	8.90286	2.3024	4.02218	4.01483	6.79412	4.37573	7.13134	1.14687	0.205363	0.200518	0.0387943	GFAP	none	none
ENSMUSG00000015242	Nipsnap3a	744	0	0	0	0	0	0	0	0	0	0	0	0	0	0	0	0	0	0	0	0	NA	NA	NA	0	0	0	0	0	0	none	none	none
ENSMUSG00000015243	Abca1	6786	3.96458	2.26067	3.03511	5.5818	5.68019	6.52645	9.87134	8.99243	10.6826	103.092	109.908	82.5082	144.853	159.24	161.561	2.03097	2.79275	3.43946	6.63666	7.28742	8.22886	9.07867	10.4357	2.19535	3.52105	0.0951847	0.0973271	0.800331	1.30284	none	none	none
ENSMUSG00000015247	Nipsnap3b	744	15.5378	20.6195	21.1143	28.2841	25.9044	35.7165	7.14573	13.1231	12.8403	26.3806	23.2243	24.7734	73.7705	66.3732	61.6038	4.32844	4.95272	3.58933	4.6889	6.09274	9.56012	10.1379	10.5021	2.72247	3.03914	1.13089	1.79266	2.37435	2.11157	none	none	none
ENSMUSG00000015289	Lage3	447	14.1064	17.7655	17.9621	8.36924	20.8394	4.95397	59.4678	27.3032	33.9435	25.2349	41.8324	34.9223	24.1653	29.3093	32.0423	4.13843	3.63082	5.36591	5.12914	4.88292	10.6723	11.0982	11.9175	3.16993	3.60011	3.3455	4.53095	2.81409	2.90558	none	none	none
ENSMUSG00000015290	Ubl4a	474	114.404	109.659	111.208	101.616	97.5843	101.222	240.024	176.557	187.318	65.205	75.903	72.2146	53.5844	39.8651	61.533	6.81708	6.66022	7.66035	6.17208	5.71866	NA	NA	NA	5.10601	4.61706	4.09887	3.94785	3.6289	3.49326	none	none	none
ENSMUSG00000015291	Gdi1	1344	702.805	647.261	671.425	667.348	723.69	751.323	821.989	552.109	406.412	234.832	204.292	240.972	112.302	143.595	128.658	9.39838	9.48204	9.21554	7.83098	7.0133	16.4939	16.43	16.6025	7.74766	7.33277	6.39657	4.40485	4.11706	5.26359	none	none	none
ENSMUSG00000015305	Sash1	3693	5.1792	4.34953	5.48258	11.9029	15.6563	10.9932	3.16711	2.64382	2.73901	143.924	139.724	156.653	8.69583	5.9354	5.85284	2.58587	3.7919	1.94485	7.20718	2.96865	10.3823	12.2307	11.8196	3.74846	5.79008	0.361545	0.115714	0.045737	0.0336453	GFAP	none	none
ENSMUSG00000015312	Gadd45b	483	14.7956	19.4307	18.0688	20.3318	9.31058	10.6977	13.2085	10.1073	5.81732	16.3478	10.2912	21.0271	3.02218	1.04326	0.539164	4.20412	3.85267	3.42103	4.07799	1.34191	10.337	9.47901	9.16087	3.4957	2.99156	5.25615	4.42246	2.6902	2.38158	none	none	none
ENSMUSG00000015314	Slamf6	1056	0.796154	0	0	0	0	0	0	0.330209	0	0	0	0	25.9873	31.4934	31.0724	0.339576	0	0.15065	0	4.93158	NA	NA	NA	0.0285692	0.0379679	0	0	0.13577	0.188363	Cx3cr1	none	none
ENSMUSG00000015316	Slamf1	1032	0.203667	0.174885	1.01479	0	0.62251	0	0	0	0	0	0	0.182244	5.65781	6.59165	5.80385	0.550358	0.272027	0	0.0850818	2.81101	NA	NA	NA	0.0565835	0	0.0312739	0.0580043	0.246508	0.271272	Cx3cr1	none	none
ENSMUSG00000015335	Zdhhc12	846	2.48445	2.34668	3.30108	3.86929	1.89843	2.61752	0	2.06088	0	5.06666	11.1914	7.11397	4.48612	4.46715	4.00167	1.89171	1.92413	0.754425	3.13597	2.41097	7.96435	7.28025	5.42398	2	3.08746	2.67879	3.64078	5.11947	3.98411	none	none	none
ENSMUSG00000015337	Endog	885	21.3747	21.0052	19.7225	14.2667	12.7034	20.8515	49.2595	31.127	13.9694	15.8047	23.536	27.6269	8.57685	3.13155	4.41383	4.43968	4.08241	5.02023	4.54365	2.67222	10.7748	11.2475	11.7852	4.08576	4.7588	4.95314	4.1962	2.97946	2.50322	none	none	none
ENSMUSG00000015340	Cybb	1713	0	0	0	0	0	0	0	0.407123	0.328052	0	0	0.219586	74.1361	77.0697	67.3464	0	0	0.316213	0.101913	6.20654	NA	NA	NA	0.0840643	0.0285692	0.202365	1.16305	1.26825	0.69257	Cx3cr1	none	Macrophage
ENSMUSG00000015341	Golga7	414	5.07692	3.9235	5.05926	13.5545	6.20705	7.13181	17.9782	12.6341	8.14424	17.9826	25.1562	33.6174	20.4501	17.6485	16.3546	2.50756	3.31679	3.79897	4.73256	4.25935	13.0248	12.8498	13.5365	4.37712	4.69228	1.37333	1.28159	1.03864	1.12233	none	none	none
ENSMUSG00000015342	Xk	1341	13.0092	15.4775	14.8382	14.2974	14.372	16.5132	34.0949	26.7831	36.0387	4.03758	5.82477	3.366	1.74164	2.63032	2.13615	3.94875	4.00548	5.05769	2.43548	1.6642	11.7947	11.3613	12.1662	3.08406	1.97085	0.339924	0.148094	0.139281	0.0625932	none	none	none
ENSMUSG00000015354	Pcolce2	1245	1.01294	0.869789	0.560786	0.375607	2.32204	1.77866	0	1.68049	1.3541	2.89927	3.42213	4.53194	0.937969	1.2142	0.20917	0.859575	1.31736	1.00829	2.2072	0.837632	6.10531	6.97745	6.59358	1.8953	2.28885	0.282861	0.115536	0.0146989	0.016366	none	none	none
ENSMUSG00000015355	Cd48	723	0.290712	0.249628	0	0	0.444281	0	0	0.482297	0	0	0.327382	0.520264	171.612	190.616	161.004	0.238925	0.19924	0.215077	0.359014	7.45459	NA	NA	NA	0.62293	0.400538	0.0739854	0.34999	2.09824	2.47214	Cx3cr1	none	none
ENSMUSG00000015357	Clpx	1905	32.6586	29.6539	33.901	27.9842	37.0957	36.8102	41.3034	38.0734	43.6583	31.3826	26.3411	31.3953	25.5929	23.1448	26.5201	5.0475	5.12777	5.39272	4.94046	4.7052	12.3293	12.625	12.8257	3.27798	3.76765	0.949983	0.680014	0.971888	1.10069	none	none	none
ENSMUSG00000015363	Trabd	1131	2.60175	5.10645	4.93848	2.4808	1.70406	7.1791	13.1618	4.93299	11.9247	3.59045	5.23204	5.6539	9.03448	9.5789	6.21683	2.38282	2.25942	3.46028	2.54237	3.21362	9.49892	9.94418	10.65	2.98914	2.9386	3.24277	3.49473	2.67907	2.67681	none	none	none
ENSMUSG00000015365	Mov10l1	3720	0	0	0	0	0	0	0	0	0	0	0	0	0	0	0	0	0	0	0	0	NA	NA	NA	0.0285692	0	0	0	0	0	none	none	none
ENSMUSG00000015377	Dennd6b	1758	13.1515	13.1408	10.3257	10.1081	7.85679	6.29814	9.67722	13.6862	14.0648	4.61979	4.84705	4.49327	1.32852	2.00641	1.77759	3.72312	3.18391	3.75233	2.49911	1.43519	NA	NA	NA	2.37851	1.81831	2.09587	0.851593	0.979339	1.21821	none	none	none
ENSMUSG00000015396	Cd83	591	17.7821	26.8737	21.2643	27.6939	20.1099	26.2284	17.9913	20.6506	33.2798	11.8335	10.4131	11.4564	79.037	92.5086	90.3305	4.52189	4.68243	4.64235	3.61286	6.46421	11.6259	11.5712	7.96829	3.774	2.43118	1.08975	1.77706	3.19125	2.9569	Cx3cr1	MG	Micro_1
ENSMUSG00000015401	Cltrn	669	0	0.269778	0	0	0	0	0	0	0	0	0	0	0	0	0	0.12423	0	0	0	0	NA	NA	NA	NA	NA	NA	NA	NA	NA	none	none	none
ENSMUSG00000015405	Ace2	2418	0.086925	0	0	0	0	0	0	0	0	0.0933001	0	0.155563	0.120737	0	0	0.0412079	0	0	0.114972	0.0569244	NA	NA	NA	0.333424	0	0	0	0	0	none	none	none
ENSMUSG00000015437	Gzmb	744	0	0	0	0	0	0	0	0	0	0	0	0	0	0	0	0	0	0	0	0	NA	NA	NA	0	0	0.345372	0.0941022	0	0	none	none	none
ENSMUSG00000015441	Gzmf	747	0	0	0	0	0	0	0	0	0	0	0	0	0	0	0	0	0	0	0	0	NA	NA	NA	0	0	0	0	0	0	none	none	none
ENSMUSG00000015443	Gzmn	747	0	0	0	0	0	0	0	0	0	0	0	0	0	0	0	0	0	0	0	0	NA	NA	NA	0	0	0	0	0	0	none	none	none
ENSMUSG00000015452	Ager	1209	0	0	0	0	0	0	0	0	0	0.1866	0.783118	0.777814	0	0	0	0	0	0	0.662215	0	NA	NA	NA	0.286881	0.936088	0.27716	0	1.50306	1.75343	none	none	none
ENSMUSG00000015461	Atf6b	2130	18.4528	16.2687	14.0947	24.15	19.3031	18.7135	22.963	24.3927	15.0382	9.10872	9.11229	12.715	19.874	25.313	19.9286	4.11037	4.4411	4.44612	3.49978	4.50495	13.9303	13.8982	13.8118	4.37712	4.65497	2.96939	3.8404	4.10177	2.88358	none	none	none
ENSMUSG00000015467	Egfl8	882	0	0	0.395793	0	0	0	0	0	0	0.511564	0.805093	0	0	0	0	0.178786	0	0	0.524952	0	NA	NA	NA	2.27501	2.52774	4.98216	2.19519	3.89923	4.00236	none	none	none
ENSMUSG00000015468	Notch4	5895	0.0713095	0.0918479	0	0	0	0	0	0	0	0.420966	0.321218	0.319042	0.841905	1.62409	1.19275	0.0764028	0	0	0.436953	1.15029	NA	NA	NA	0.422233	0.736966	0.242247	0.730778	1.73125	1.03511	none	none	none
ENSMUSG00000015474	Ppt2	909	1.61858	1.38984	0.384036	0.514446	1.06012	1.62407	9.35784	2.30165	3.70926	0.992738	1.04157	3.10356	5.45988	4.43472	4.2973	1.09141	1.04699	2.61422	1.43969	2.51869	10.5264	10.1517	10.5257	4.08066	4.48285	2.62648	4.27316	4.32495	3.50297	none	none	none
ENSMUSG00000015476	Prrt1	921	62.0741	69.1747	56.4759	119.827	80.5653	66.5209	68.1149	61.335	64.0663	13.4723	11.565	18.5829	7.29065	4.65049	3.95855	5.99038	6.49139	6.03354	3.95792	2.65533	12.9435	13.6654	11.9893	5.14893	4.03151	0.277199	0	0	0	none	none	none
ENSMUSG00000015478	Rnf5	543	25.9344	33.9025	30.2158	40.4764	24.8454	35.3438	19.5817	30.1822	34.1518	72.7071	86.3095	86.5909	49.4636	41.2952	49.8771	4.95501	5.11083	4.85658	6.37276	5.58131	13.1988	13.4424	13.4372	5.16993	5.94173	6.20134	6.19219	6.14421	5.30074	none	none	none
ENSMUSG00000015484	Fam163a	507	0.829131	1.06794	2.06562	2.76705	0	1.4559	10.486	3.43886	3.32516	17.3538	19.6081	18.1769	0.575824	0.993875	1.02728	1.21468	1.26763	2.75489	4.27647	0.899687	7.54872	9.33538	12.245	1.848	2.95358	0.135455	0.0442152	0.0058035	0	GFAP	none	none
ENSMUSG00000015488	Cacfd1	516	13.8494	11.1926	14.2071	9.96888	9.33764	12.8746	26.7882	29.0584	10.8906	17.0511	14.6789	18.9533	4.52625	2.44135	3.0281	3.81589	3.55177	4.53889	4.16144	2.115	12.0636	11.8063	12.4816	3.81762	3.7137	2.6092	1.6134	1.03955	0.781146	none	none	none
ENSMUSG00000015501	Hivep2	7293	47.8413	41.1298	38.4845	34.9457	47.1714	40.8898	17.9328	13.9136	16.6436	5.38247	4.64112	6.16345	2.72208	4.31831	4.21351	5.44245	5.3924	4.10126	2.6771	2.24832	14.5733	14.3285	13.283	4.06523	3.95977	2.00887	1.15119	0.195008	0.220251	none	none	none
ENSMUSG00000015519	2310057J18Rik	1014	0	0	0	0	0	0	0	0	0	0.222485	0	0	0	0	0	0	0	0	0.103211	0	NA	NA	NA	0	0	0	0	0	0	none	none	none
ENSMUSG00000015522	Arnt	2376	9.28846	9.03925	7.19923	9.05346	7.16515	10.252	9.39772	5.4301	6.14931	8.64039	8.16885	9.4196	34.8955	29.1606	26.3047	3.24929	3.29624	2.99862	3.28436	4.95978	NA	NA	NA	3.07382	2.20997	0.0696901	0.297107	0.279346	0.425035	none	none	none
ENSMUSG00000015533	Itga2	3537	0.0594245	0	0.0986964	0	0	0	0	0.197173	0.635513	0.574045	0.602283	0.372216	0.0825397	0.0712319	0.147253	0.0741039	0	0.353394	0.600442	0.137951	NA	NA	NA	0	0.0379679	0	0	0	0	none	none	none
ENSMUSG00000015536	Mocs2	570	60.4742	68.3929	64.9183	92.7058	86.7844	67.3393	87.6743	110.116	115.348	121.507	110.874	108.556	58.9007	51.7155	50.2558	6.03552	6.37984	6.71945	6.84104	5.77146	12.6942	12.9649	13.3937	4.34056	4.48714	2.22873	1.61145	1.36098	1.52255	none	none	none
ENSMUSG00000015542	Nat9	726	17.0811	13.4242	12.5018	12.2383	10.1762	9.15052	13.1812	15.3697	17.8029	8.70081	8.47677	9.32606	27.7466	28.1098	18.2937	3.93882	3.52628	4.04013	3.29786	4.68463	11.3053	11.3527	11.7471	3.21723	3.1188	3.76456	3.77053	3.64963	3.59502	none	none	none
ENSMUSG00000015568	Lpl	1425	23.1572	19.1247	24.7424	111.903	96.7026	80.2891	15.6695	15.1715	21.6894	8.86567	7.30855	6.20319	54.7009	41.0188	39.8391	4.54482	6.60434	4.21024	3.08051	5.52939	10.2229	12.0924	12.1106	2.0635	1.4957	0.740552	0.84299	1.23998	1.04862	none	none	Micro_1
ENSMUSG00000015575	Atp6v0e	315	12.0105	10.8862	13.2986	11.8763	9.17757	16.4032	10.1265	14.3908	14.2718	154.697	135.256	203.599	191.848	205.557	168.651	3.70765	3.75336	3.80009	7.37084	7.56746	9.2864	9.13368	9.91958	4.46597	6.12915	1.19179	3.31159	2.12818	2.21088	none	none	none
ENSMUSG00000015579	Nkx2-5	957	0	0	0	0	0	0	0	0	0	0	0	0	0	0	0	0	0	0	0	0	NA	NA	NA	0	0	0	0	0	0	none	none	none
ENSMUSG00000015597	Zfp318	6714	9.10988	8.95148	8.00711	7.66152	8.37245	7.47597	4.11758	4.72621	4.35233	3.02412	2.39729	1.98888	3.08727	2.40164	3.06418	3.27642	3.1435	2.43261	1.79498	1.94524	10.6567	10.371	11.3527	2.68257	2.07496	1.57153	0.523209	0.762187	1.4643	none	none	none
[truncated: 20,762 more rows]
