# Supplementary material for: Prions induce minor genome-wide translational changes in neurons compared to glia
Source: bioRxiv preprint, doi:10.1101/2020.06.26.172841, version 1 (2020-06-27)
Supplement: Supplementary File 4 [file 172841_file07.xlsx]

## Sheet: SupplementaryTable4
GeneID	MGIsymbol	CamKIIaCX_2wpi_Ctrl_1	CamKIIaCX_2wpi_Ctrl_2	CamKIIaCX_2wpi_Ctrl_3	CamKIIaCX_2wpi_PrD_1	CamKIIaCX_2wpi_PrD_2	CamKIIaCX_2wpi_PrD_3	CamKIIaCX_4wpi_Ctrl_1	CamKIIaCX_4wpi_Ctrl_2	CamKIIaCX_4wpi_Ctrl_3	CamKIIaCX_4wpi_PrD_1	CamKIIaCX_4wpi_PrD_2	CamKIIaCX_4wpi_PrD_3	CamKIIaCX_8wpi_Ctrl_1	CamKIIaCX_8wpi_Ctrl_2	CamKIIaCX_8wpi_Ctrl_3	CamKIIaCX_8wpi_PrD_1	CamKIIaCX_8wpi_PrD_2	CamKIIaCX_8wpi_PrD_3	CamKIIaCX_16wpi_Ctrl_1	CamKIIaCX_16wpi_Ctrl_2	CamKIIaCX_16wpi_Ctrl_3	CamKIIaCX_16wpi_PrD_1	CamKIIaCX_16wpi_PrD_2	CamKIIaCX_16wpi_PrD_3	CamKIIaCX_24wpi_Ctrl_1	CamKIIaCX_24wpi_Ctrl_2	CamKIIaCX_24wpi_Ctrl_3	CamKIIaCX_24wpi_PrD_1	CamKIIaCX_24wpi_PrD_2	CamKIIaCX_24wpi_PrD_3	CamKIIaCX_term_Ctrl_1	CamKIIaCX_term_Ctrl_2	CamKIIaCX_term_PrD_1	CamKIIaCX_term_PrD_2	CamKIIaCX_2wpi_Ctrl	CamKIIaCX_2wpi_PrD	CamKIIaCX_4wpi_Ctrl	CamKIIaCX_4wpi_PrD	CamKIIaCX_8wpi_Ctrl	CamKIIaCX_8wpi_PrD	CamKIIaCX_16wpi_Ctrl	CamKIIaCX_16wpi_PrD	CamKIIaCX_24wpi_Ctrl	CamKIIaCX_24wpi_PrD	CamKIIaCX_term_Ctrl	CamKIIaCX_term_PrD	baseMean_CamKIIaCX_2wpi	log2FC_CamKIIaCX_2wpi
ENSMUSG00000000001	Gnai3	6.92805	6.86068	6.8319	7.16115	6.85065	6.96189	6.78058	6.31179	6.75066	6.75296	6.64809	6.89144	6.65667	6.62422	6.59511	6.52154	6.66748	6.51265	7.12698	7.17558	7.08902	7.13924	7.09318	7.25073	7.54657	7.54762	7.50784	7.36852	7.4799	7.68856	7.35982	7.43042	7.39081	7.35708	6.87355	6.99123	6.61434	6.76416	6.64045	6.59471	7.13053	7.16105	7.53401	7.51233	7.39512	7.37394	126.103	0.25902
ENSMUSG00000000028	Cdc45	2.7309	2.71856	2.7434	2.68406	2.7237	2.75039	2.55336	2.57837	2.6251	2.63985	2.59604	2.65366	2.63295	2.66026	2.60822	2.66793	2.66566	2.65896	3.37474	3.34427	3.33272	3.33678	3.35296	3.39332	3.54397	3.55072	3.52676	3.60334	3.55618	3.53501	3.16291	3.18628	3.15983	3.17239	2.73095	2.71938	2.58561	2.62985	2.64661	2.64727	3.35058	3.36102	3.54049	3.56484	3.1746	3.16611	6.13008	-0.194129
ENSMUSG00000000049	Apoh	NA	NA	NA	NA	NA	NA	NA	NA	NA	NA	NA	NA	NA	NA	NA	NA	NA	NA	2.5237	2.54829	2.54099	2.53718	2.55665	2.57468	2.41169	2.44675	2.42997	2.37776	2.41851	2.43525	NA	NA	NA	NA	NA	NA	NA	NA	NA	NA	2.53766	2.55617	2.42947	2.4105	NA	NA	NA	NA
ENSMUSG00000000056	Narf	7.30485	7.39889	7.45671	7.35864	7.18356	7.42791	7.19285	7.16966	7.27936	7.16551	7.1387	7.44922	6.9938	7.03593	6.99246	6.91503	7.03805	7.24592	7.78657	7.70581	7.811	7.60501	7.59608	7.78487	7.63166	7.61497	7.68294	7.7611	7.75144	7.76942	7.59978	7.57387	7.58287	7.69056	7.38682	7.32337	7.21396	7.25115	7.01487	6.98185	7.76779	7.66198	7.64319	7.76065	7.58683	7.63671	164.793	-0.128619
ENSMUSG00000000058	Cav2	7.0919	7.09904	7.12625	7.11255	7.07433	6.93926	6.73757	6.99524	6.91824	6.8554	6.99087	6.75803	6.58389	6.64144	6.69847	6.80014	6.54768	6.7158	7.48704	7.3596	7.46716	7.39286	7.54982	7.44237	7.57705	7.61168	7.55647	7.74391	7.50123	7.5052	7.57905	7.50936	7.57705	7.49195	7.10573	7.04205	6.88368	6.8681	6.61266	6.6821	7.43793	7.46168	7.58174	7.58345	7.5442	7.5345	135.705	-0.153855
ENSMUSG00000000078	Klf6	7.61445	7.59749	7.66166	7.8022	7.69925	7.38857	7.21882	7.27926	7.0871	7.26279	7.13119	7.00376	7.26191	7.33777	7.2035	7.3563	7.25318	7.1651	8.17682	8.17055	8.03398	8.26855	8.22974	8.08084	8.25742	8.36975	8.03378	8.23336	8.01927	8.16489	8.21701	8.0396	8.17268	8.10417	7.62453	7.63	7.19506	7.13258	7.29984	7.27099	8.12712	8.19304	8.22032	8.13917	8.1283	8.13843	201.983	0.0173332
ENSMUSG00000000085	Scmh1	5.86953	5.9525	6.00234	6.20842	6.03683	5.91002	5.53223	5.38936	5.64771	5.41999	5.50317	5.55559	5.58243	5.63235	5.61992	5.73557	5.68271	5.63297	6.40506	6.41476	6.32767	6.43137	6.40562	6.43867	6.26203	6.3276	6.2462	6.26719	6.25275	6.32742	6.46137	6.46579	6.49502	6.54779	5.94146	6.05176	5.5231	5.49292	5.60739	5.6794	6.3825	6.42522	6.27861	6.28245	6.46358	6.5214	67.4509	0.343494
ENSMUSG00000000088	Cox5a	10.1308	10.1335	10.3208	10.3683	10.1251	10.2372	10.0988	9.80425	9.92145	10.087	9.9495	9.91354	9.89233	10.0309	9.89037	9.9921	9.88667	9.96061	10.6335	10.6832	10.6522	10.8112	10.6254	10.677	10.8418	11.0443	10.7761	10.7828	10.8459	10.8904	10.8131	10.8393	10.9584	10.7728	10.195	10.2435	9.94149	9.98335	9.96163	9.92305	10.6563	10.7045	10.8874	10.8397	10.8262	10.8656	1199.4	0.0664395
ENSMUSG00000000126	Wnt9a	4.12999	4.06147	4.12812	4.21412	4.15794	4.12724	4.61119	4.66249	4.45468	4.44066	4.46739	4.54002	4.23786	4.20696	4.25055	4.15916	4.19052	4.22052	4.99881	5.0357	5.05808	5.04464	5.02598	5.00832	4.87096	4.79853	4.84387	4.78269	4.81673	4.76547	4.72748	4.6284	4.74071	4.67997	4.10653	4.16644	4.57612	4.48269	4.22241	4.20008	5.03086	5.02632	4.83778	4.7883	4.67794	4.71034	18.7116	0.457434
ENSMUSG00000000127	Fer	6.69638	6.7873	6.9198	6.54316	6.8119	6.77555	6.66098	6.38824	6.66264	6.60223	6.51693	6.7368	6.94438	6.91847	6.88677	6.87628	6.79422	6.7413	7.28247	7.3495	7.25169	7.29318	7.32624	7.43153	7.52577	7.59399	7.40072	7.37182	7.36441	7.47439	7.36018	7.34514	7.37419	7.30097	6.80116	6.7102	6.57062	6.61866	6.93143	6.85242	7.29455	7.35032	7.50683	7.40354	7.35266	7.33758	106.692	-0.194256
ENSMUSG00000000131	Xpo6	7.99769	7.98044	7.95982	8.0594	8.06125	7.8416	7.68232	7.56978	7.65906	7.76579	7.67531	7.68646	7.76255	7.84981	7.82611	7.74814	7.78592	7.75244	8.3644	8.53094	8.3438	8.63824	8.53823	8.61184	8.63472	8.66138	8.54717	8.62283	8.50439	8.5864	8.5602	8.44038	8.58849	8.6225	7.97932	7.98742	7.63705	7.70919	7.80618	7.78672	8.41305	8.5961	8.61442	8.57121	8.50029	8.60549	254.808	0.0109575
ENSMUSG00000000134	Tfe3	6.5501	6.6562	6.66852	6.46038	6.56815	6.66668	6.37501	6.74476	6.49146	6.60073	6.66601	6.62668	6.34758	6.48156	6.4363	6.34971	6.42789	6.44501	7.23566	7.25427	7.32863	7.34045	7.2521	7.23847	7.33829	7.26994	7.31641	7.39976	7.4066	7.38539	7.20906	7.1588	7.24682	7.28588	6.62494	6.56507	6.53708	6.63114	6.41457	6.40463	7.27285	7.277	7.30821	7.39725	7.18393	7.26635	95.4731	-0.127647
ENSMUSG00000000142	Axin2	5.35729	5.30796	5.39829	5.36905	5.41951	5.3314	5.16384	5.07959	5.0928	5.03436	4.97486	5.20556	5.50814	5.58977	5.54237	5.54384	5.57372	5.57852	5.87581	5.85387	5.92304	5.97105	6.00823	5.9487	5.96333	6.09499	6.04321	6.04857	6.02647	6.03529	6.0013	6.04757	6.10213	6.01228	5.35452	5.37332	5.11208	5.07159	5.54896	5.55331	5.88424	5.97599	6.03384	6.03678	6.02443	6.05721	41.429	0.0851473
ENSMUSG00000000148	Brat1	5.35234	5.39702	5.29935	5.31568	5.38323	5.34493	5.1729	5.34408	5.31169	5.25077	5.21674	5.02703	4.74462	4.86872	4.87584	4.74037	4.78672	4.82828	5.67158	5.68717	5.63715	5.65518	5.76469	5.68755	5.74021	5.76761	5.72586	5.79867	5.72314	5.80528	5.68259	5.7396	5.78037	5.71094	5.34957	5.34795	5.27622	5.16485	4.80667	4.80098	5.6653	5.70248	5.74456	5.7757	5.7111	5.74566	40.2636	-0.00318879
ENSMUSG00000000149	Gna12	4.28395	4.28266	4.16312	4.2228	4.22613	4.28588	4.18656	4.35344	4.19043	4.16956	4.26487	4.29193	4.19324	4.22044	4.18347	4.15666	4.17777	4.31567	4.75653	4.6789	4.77863	4.71598	4.7674	4.72796	5.13612	5.20179	5.3355	5.16542	5.19377	5.18837	5.09216	5.11713	5.10832	5.10019	4.24324	4.24494	4.24348	4.24212	4.20684	4.17263	4.73802	4.73712	5.22447	5.18252	5.10465	5.10425	18.5751	0.00614421
ENSMUSG00000000167	Pih1d2	2.7876	2.74157	2.77508	2.78993	2.8246	2.79143	2.4969	2.50393	2.50767	2.5875	2.52204	2.53859	2.82122	2.76913	2.83152	2.77319	2.78556	2.80089	3.55019	3.52019	3.5364	3.49745	3.5443	3.49643	3.5369	3.57748	3.57211	3.55675	3.54972	3.58242	3.08667	3.0907	3.07715	3.06133	2.76809	2.80199	2.50283	2.54938	2.79517	2.79676	3.53559	3.51273	3.56217	3.56296	3.08868	3.06924	6.98013	0.628907
ENSMUSG00000000168	Dlat	9.07936	9.10773	9.13432	9.24496	9.03976	9.14418	9.01959	8.60418	8.815	8.93646	8.76424	8.75239	8.85996	8.88026	8.85467	8.76988	8.73285	8.83049	9.46429	9.43279	9.57726	9.40094	9.42813	9.51234	9.7166	9.71364	9.81639	9.55039	9.57092	9.73016	9.52817	9.6352	9.51064	9.38269	9.10713	9.14297	8.81292	8.8177	8.87011	8.7858	9.49145	9.44714	9.74888	9.61716	9.58169	9.44667	561.068	0.0489008
ENSMUSG00000000171	Sdhd	6.85143	6.8308	6.73177	6.65578	6.80109	6.63171	6.46445	6.92381	6.46637	6.52098	6.67988	6.45622	6.23651	6.43005	6.56103	6.4723	6.40985	6.33056	7.24631	7.15648	7.37676	7.27459	7.32336	7.25316	7.3964	7.46362	7.60122	7.62013	7.40923	7.46895	7.31937	7.51319	7.50242	7.41077	6.80467	6.6962	6.61821	6.55236	6.33328	6.48106	7.25985	7.2837	7.48708	7.49944	7.41628	7.45659	106.963	-0.259737
ENSMUSG00000000184	Ccnd2	6.90882	6.94625	6.82262	6.80309	6.83359	6.90989	6.50369	6.58555	7.11192	6.50122	6.67731	7.28213	6.42701	6.49404	6.87576	6.44218	6.69298	6.83036	6.76598	6.76104	6.96942	6.72109	6.70751	6.87973	6.99004	7.04278	7.14792	7.23469	7.31497	7.29112	7.17265	7.09675	7.30186	7.46765	6.89256	6.84886	6.73372	6.82022	6.46052	6.67031	6.83215	6.76944	7.06025	7.28026	7.1347	7.38475	116.249	-0.0977151
ENSMUSG00000000194	Gpr107	7.74247	7.84893	7.66981	7.60722	7.87447	7.70561	7.53996	7.52548	7.74691	7.6434	7.6546	7.45959	7.55579	7.63942	7.60095	7.62283	7.52614	7.53261	8.21045	8.2792	8.24612	8.22285	8.30078	8.28024	8.63385	8.55284	8.571	8.55088	8.50347	8.45635	8.50942	8.62602	8.52009	8.47546	7.75373	7.7291	7.60412	7.58586	7.59761	7.5833	8.24526	8.26795	8.5859	8.50357	8.56772	8.49778	213.195	-0.0274752
ENSMUSG00000000197	Nalcn	9.61166	9.59813	9.69266	9.79951	9.71917	9.68583	9.40652	9.30574	9.43644	9.41432	9.40671	9.40363	9.30174	9.38484	9.14441	9.30638	9.33919	9.06976	10.0807	9.99041	10.1005	10.1276	10.0976	10.089	10.3902	10.2193	10.307	10.2928	10.2775	10.2135	10.086	10.0873	9.98644	10.0395	9.63415	9.73484	9.3829	9.40822	9.34329	9.26333	10.0572	10.1047	10.3055	10.2613	10.0866	10.013	826.162	0.147258
ENSMUSG00000000202	Btbd17	NA	NA	NA	NA	NA	NA	3.05495	3.04957	2.97988	2.93215	2.95614	3.32503	2.15307	2.13047	2.13792	2.13155	2.13081	2.15646	2.71067	2.74344	2.72258	2.72625	2.70689	2.72796	3.07671	3.14063	3.09853	3.09607	3.09877	3.07626	3.00519	3.0327	3.03484	3.00358	NA	NA	3.02813	3.07111	2.14177	2.13343	2.72556	2.72037	3.10529	3.09037	3.01894	3.01921	NA	NA
ENSMUSG00000000214	Th	NA	NA	NA	NA	NA	NA	NA	NA	NA	NA	NA	NA	NA	NA	NA	NA	NA	NA	2.52606	2.54273	2.51981	2.54857	2.5118	2.64815	NA	NA	NA	NA	NA	NA	NA	NA	NA	NA	NA	NA	NA	NA	NA	NA	2.52953	2.56951	NA	NA	NA	NA	NA	NA
ENSMUSG00000000223	Drp2	8.3809	8.27862	8.31691	8.3641	8.20783	8.14965	8.03424	8.16921	8.05692	8.05668	8.04567	7.92524	8.02966	7.96196	8.15669	8.07438	8.10722	8.02777	8.58585	8.76409	8.65179	8.50978	8.68501	8.64418	8.59094	8.51836	8.56613	8.62408	8.58081	8.6701	8.68637	8.6476	8.6395	8.6444	8.32548	8.24052	8.08679	8.0092	7.99581	8.11276	8.66724	8.61299	8.55848	8.625	8.66699	8.64195	313.759	-0.165728
ENSMUSG00000000247	Lhx2	6.46396	6.33049	6.31917	6.24151	6.28081	6.32484	6.31314	6.52774	6.50606	6.21397	6.36677	6.77528	6.34636	6.16186	6.29896	6.28346	6.26646	6.22412	7.01933	6.92832	7.00981	6.97745	7.01834	7.02032	7.13008	7.20656	7.25329	7.39091	7.3594	7.2275	7.30088	7.24702	7.27805	7.34064	6.3712	6.28238	6.44898	6.45201	6.25411	6.28296	6.98582	7.00537	7.19664	7.32594	7.27395	7.30935	79.478	-0.248612
ENSMUSG00000000253	Gmpr	7.70368	7.64485	7.59831	7.66289	7.63065	7.61001	7.4632	7.44818	7.41844	7.5362	7.50666	7.20901	7.42687	7.4488	7.5475	7.55329	7.50795	7.59666	8.26384	8.14296	8.20645	8.23503	8.21259	8.14764	8.33766	8.43535	8.41444	8.41939	8.36936	8.44861	8.37422	8.41175	8.40977	8.42229	7.64894	7.63452	7.44327	7.41729	7.43783	7.53625	8.20442	8.19842	8.39581	8.41245	8.39298	8.41603	200.046	-0.03809
ENSMUSG00000000263	Glra1	3.37698	3.39961	3.40493	3.43231	3.42322	3.37952	3.06153	3.07226	3.09103	3.09267	3.10778	3.02383	3.4518	3.44197	3.44811	3.41696	3.43741	3.4544	3.97265	4.05805	4.05402	4.02024	4.07183	3.96536	4.45442	4.37992	4.30008	4.32971	4.37088	4.3846	3.47763	3.4656	3.45524	3.4747	3.39384	3.41168	3.07494	3.07476	3.44688	3.43416	4.02824	4.01915	4.37814	4.36173	3.47161	3.46497	10.9911	0.209549
ENSMUSG00000000266	Mid2	6.35246	6.47134	6.38185	6.73609	6.52933	6.43927	6.04147	5.76344	6.12795	6.20046	6.13052	6.07425	6.10196	6.30723	6.15274	6.2389	6.3421	6.2124	6.84208	6.8133	6.89683	6.80418	6.88436	6.9315	7.12657	7.15848	7.09154	7.20489	7.1607	7.19337	7.12602	7.05766	7.06783	7.02546	6.40188	6.56823	5.97762	6.13508	6.20459	6.24458	6.85074	6.87335	7.12553	7.18632	7.09184	7.04664	93.8964	0.428602
ENSMUSG00000000275	Trim25	NA	NA	NA	NA	NA	NA	NA	NA	NA	NA	NA	NA	NA	NA	NA	NA	NA	NA	2.54448	2.55308	2.52166	2.55974	2.57493	2.55698	2.91711	2.90851	2.90077	2.92798	2.93939	2.98413	3.52789	3.51172	3.55289	3.56408	NA	NA	NA	NA	NA	NA	2.53974	2.56388	2.9088	2.9505	3.51981	3.55848	NA	NA
ENSMUSG00000000276	Dgke	8.86976	8.93225	8.84595	9.0991	8.9295	8.84146	8.80178	8.76368	8.77533	8.82412	8.83313	8.99039	8.66422	8.65041	8.66607	8.69573	8.71757	8.66955	9.42541	9.42783	9.39439	9.36177	9.3682	9.46159	9.59254	9.48236	9.58062	9.61668	9.4807	9.62484	9.35602	9.46937	9.31996	9.36602	8.88266	8.95669	8.78026	8.88255	8.65732	8.69313	9.41588	9.39718	9.55184	9.57407	9.41269	9.34299	488.39	0.107957
ENSMUSG00000000278	Scpep1	6.17809	6.17668	6.1669	6.38329	6.15414	6.30297	6.32688	6.28972	6.07416	6.15004	6.24135	6.15784	6.05164	5.97228	5.9728	5.95603	5.86329	5.95659	6.92938	6.97949	6.91159	6.84206	6.93666	6.8508	7.07643	7.02623	7.19238	7.11172	7.24354	7.12251	6.86303	6.91789	6.89765	7.00541	6.17389	6.28013	6.23026	6.18308	6.01196	5.93071	6.94016	6.87651	7.09835	7.15925	6.89046	6.95153	77.3499	0.29936
ENSMUSG00000000282	Mnt	5.81156	5.73149	5.68267	5.79232	5.77985	5.74333	5.63688	5.69309	5.8007	5.63158	5.82378	5.9464	5.45038	5.54394	5.59764	5.49758	5.61622	5.66139	6.17615	6.07111	6.24288	6.06902	6.05694	6.15608	6.20584	6.19319	6.35834	6.38	6.48065	6.4348	6.36868	6.29333	6.38623	6.44798	5.74191	5.77183	5.71022	5.80059	5.49716	5.57048	6.16338	6.09401	6.25246	6.43182	6.331	6.4171	54.5122	0.0916956
ENSMUSG00000000290	Itgb2	2.95674	2.76761	2.7245	2.83314	2.81658	2.7285	NA	NA	NA	NA	NA	NA	NA	NA	NA	NA	NA	NA	2.26209	2.22962	2.24248	2.2516	2.25711	2.23027	2.46529	2.4818	2.49291	2.48422	2.48025	2.44843	3.99157	4.02249	4.0608	4.1777	2.81628	2.79274	NA	NA	NA	NA	2.24473	2.24633	2.48	2.47096	4.00703	4.11925	7.48221	-0.434545
ENSMUSG00000000295	Hddc2	5.76117	5.69079	5.8537	5.78844	5.89048	5.80471	5.61708	5.47125	5.14891	5.55477	5.41479	5.13194	5.44954	5.46567	5.50941	5.43501	5.54148	5.50616	6.15927	5.99733	6.01492	6.09785	6.02222	6.05275	6.26866	6.28537	6.33211	6.29411	6.29789	6.26136	6.06842	6.00892	6.03406	6.02988	5.76855	5.82787	5.41241	5.36716	5.45761	5.4953	6.05717	6.05761	6.29538	6.28445	6.03867	6.03197	55.9305	0.218519
ENSMUSG00000000296	Tpd52l1	6.64373	6.66677	6.60632	6.52916	6.6055	6.80759	6.47781	6.32813	6.424	6.48892	6.51655	6.20851	6.63151	6.60479	6.60229	6.60008	6.5929	6.56112	7.19264	7.25273	7.12683	7.30148	7.08843	7.2835	7.36511	7.33506	7.39212	7.40027	7.3641	7.39933	7.46962	7.29114	7.45398	7.49527	6.63894	6.64742	6.40998	6.40466	6.61815	6.59842	7.19073	7.22447	7.3641	7.3879	7.38038	7.47463	98.9366	0.0570232
ENSMUSG00000000301	Pemt	2.4356	2.45973	2.4439	2.46567	2.43657	2.46798	2.23018	2.16403	2.22199	2.23424	2.23011	2.24563	2.80437	2.79294	2.79922	2.81385	2.75111	2.81044	3.32789	3.35204	3.35983	3.29552	3.34245	3.30892	3.66658	3.70944	3.64319	3.63802	3.7082	3.64263	3.08476	3.05958	3.07019	3.0937	2.44641	2.45674	2.2054	2.23666	2.79866	2.78806	3.34658	3.31563	3.67307	3.66295	3.07217	3.08195	5.63932	0.22213
ENSMUSG00000000305	Cdh4	6.74334	6.72429	6.63936	6.77404	6.76942	6.80947	6.75409	7.03887	6.62585	6.78064	6.81853	6.66046	6.82534	6.73191	6.66824	6.64698	6.65391	6.63557	7.74974	7.63417	7.61288	7.6088	7.60881	7.55941	7.77496	7.64103	7.7146	7.72317	7.81738	7.49062	7.52036	7.50772	7.52815	7.54071	6.70233	6.78431	6.80627	6.75321	6.77862	6.65638	7.6656	7.59234	7.7102	7.67706	7.51404	7.53443	107.559	0.198451
ENSMUSG00000000308	Ckmt1	10.3996	10.4127	10.3379	10.7352	10.2772	10.3869	10.3168	10.2102	10.1496	10.2508	10.1861	9.98159	9.92125	10.0132	10.0709	10.0353	10.0219	10.0072	10.8579	10.777	10.885	10.8319	10.7917	10.7131	10.8528	10.9725	11.0332	10.7631	10.828	10.8512	10.8679	10.8563	10.8593	10.7481	10.3834	10.4664	10.2255	10.1395	9.96724	10.0427	10.84	10.7789	10.9528	10.8141	10.8621	10.8037	1392.4	0.135079
ENSMUSG00000000317	Bcl6b	NA	NA	NA	NA	NA	NA	NA	NA	NA	NA	NA	NA	NA	NA	NA	NA	NA	NA	NA	NA	NA	NA	NA	NA	1.60962	1.59481	1.63393	1.64534	1.6087	1.58665	NA	NA	NA	NA	NA	NA	NA	NA	NA	NA	NA	NA	1.61279	1.61356	NA	NA	NA	NA
ENSMUSG00000000318	Clec10a	NA	NA	NA	NA	NA	NA	NA	NA	NA	NA	NA	NA	NA	NA	NA	NA	NA	NA	NA	NA	NA	NA	NA	NA	1.64064	1.65522	1.60775	1.60603	1.65629	1.65032	NA	NA	NA	NA	NA	NA	NA	NA	NA	NA	NA	NA	1.63454	1.63755	NA	NA	NA	NA
ENSMUSG00000000325	Arvcf	6.00946	5.92285	5.8757	5.96246	5.80765	5.82459	5.75595	5.99523	5.88729	5.72731	5.71898	6.06146	5.70991	5.8129	5.85507	5.83329	5.85602	5.96023	6.34957	6.43598	6.47475	6.53327	6.35501	6.40384	6.44869	6.47716	6.41491	6.53505	6.5617	6.47934	6.56817	6.56765	6.66368	6.80219	5.93601	5.8649	5.87949	5.83591	5.7614	5.84813	6.4201	6.43071	6.44692	6.52536	6.56791	6.73293	60.8176	-0.267507
ENSMUSG00000000326	Comt	8.74355	8.65179	8.69108	8.65044	8.52265	8.6287	8.44214	8.76381	8.56101	8.43929	8.55929	8.46157	8.47691	8.37119	8.56446	8.49921	8.36472	8.43508	9.2658	9.20638	9.29416	9.1752	9.23058	9.13973	9.23851	9.30959	9.34305	9.38974	9.33434	9.23835	9.31562	9.32129	9.37566	9.42134	8.69547	8.60059	8.58899	8.48672	8.42405	8.47613	9.25545	9.18184	9.29705	9.32081	9.31846	9.3985	402.19	-0.164859
ENSMUSG00000000339	Rtca	8.1057	8.07001	8.19685	8.2555	8.05392	8.23156	8.13864	7.85848	8.0286	7.98614	7.991	7.94817	8.17059	8.0058	7.97448	7.94027	7.90064	7.76447	8.76454	8.62152	8.62419	8.60981	8.57754	8.65957	8.85505	8.8372	8.87326	8.65534	8.71735	8.88692	8.77136	8.81447	8.74848	8.80175	8.12419	8.18033	8.00858	7.9751	8.08819	7.93846	8.67008	8.61564	8.85517	8.7532	8.79291	8.77511	286.935	0.096214
ENSMUSG00000000340	Dbt	5.42842	5.37005	5.39396	5.56487	5.31849	5.53112	5.45295	5.20247	5.1792	5.19802	5.21701	5.25089	5.22972	5.26745	5.31962	5.31845	5.17733	5.09735	5.9501	5.88858	5.8346	5.84861	5.94674	5.9521	6.04974	6.17063	6.14885	6.11307	6.17693	6.21797	6.167	6.1889	6.22722	6.14989	5.39748	5.47149	5.27821	5.22197	5.24858	5.2718	5.89109	5.91582	6.12308	6.16932	6.17795	6.18856	45.297	0.302904
ENSMUSG00000000346	Dazap2	6.99108	7.01572	6.88941	7.06767	6.9487	7.00489	6.87651	6.94444	6.86023	6.86051	6.83413	6.9838	6.58948	6.66483	6.75651	6.69834	6.53741	6.70614	7.45506	7.41427	7.62246	7.43005	7.37038	7.50079	7.50776	7.75941	7.83735	7.70278	7.62574	7.63031	7.70291	7.66808	7.82792	7.79077	6.9654	7.00709	6.89373	6.89281	6.62716	6.66409	7.49726	7.43374	7.70151	7.65295	7.6855	7.80935	127.917	0.0769647
ENSMUSG00000000355	Mcts1	8.72095	8.90375	9.0401	9.04217	8.87959	8.99407	8.75224	7.925	8.4527	8.74534	8.54785	8.50678	8.79582	8.92314	8.66905	8.74178	8.64218	8.72203	9.31676	9.1668	9.24044	9.17614	9.17196	9.36378	9.63179	9.62247	9.51031	9.25498	9.39749	9.55743	9.31815	9.39265	9.14435	8.9489	8.88827	8.97195	8.37665	8.59999	8.85948	8.68434	9.24133	9.23729	9.58819	9.4033	9.3554	9.04663	492.45	0.122626
ENSMUSG00000000365	Rnf17	2.97793	3.04964	3.07063	3.05038	3.00764	3.0192	NA	NA	NA	NA	NA	NA	2.26207	2.31001	2.29651	2.27658	2.29124	2.26076	3.12051	3.15271	3.15546	3.12012	3.12051	3.16585	3.38428	3.4249	3.3835	3.36248	3.3732	3.41112	3.05837	3.07549	3.04429	3.04467	3.03273	3.02574	NA	NA	2.28604	2.28811	3.14289	3.13549	3.39756	3.38227	3.06693	3.04448	8.5558	-0.128425
ENSMUSG00000000374	Trappc10	8.29072	8.21106	8.21377	8.17843	8.26436	8.07523	7.86821	8.06683	8.14151	7.9393	7.83726	7.87736	8.24543	8.16676	8.1723	8.1596	8.15353	8.13307	8.65281	8.89676	8.8188	8.91533	8.82986	8.87243	8.91933	8.95691	8.75396	8.91099	8.87782	9.02278	8.90726	8.78388	8.9478	8.9428	8.23852	8.17267	8.02551	7.88464	8.20609	8.16181	8.78946	8.87254	8.87673	8.9372	8.84557	8.9453	295.644	-0.114453
ENSMUSG00000000378	Ccm2	5.50388	5.52064	5.3951	5.35841	5.48068	5.42393	5.42933	5.61456	5.60591	5.41114	5.40926	5.49428	5.65251	5.66915	5.5398	5.77796	5.70429	5.71117	6.26939	6.29587	6.31609	6.44149	6.293	6.20019	6.29067	6.22174	6.16805	6.36847	6.33634	6.24864	6.57367	6.51193	6.5324	6.65397	5.47321	5.421	5.54993	5.43823	5.66083	5.67402	6.29379	6.31156	6.22682	6.31782	6.5428	6.59319	42.5279	-0.202763
ENSMUSG00000000384	Tbrg4	6.60605	6.4382	6.5096	6.43155	6.56982	6.50774	6.22555	6.61659	6.22835	6.21005	6.51091	6.20059	6.35872	6.35557	6.39442	6.33094	6.39777	6.32713	6.95501	6.92262	6.98351	6.97686	7.09048	6.99437	7.07195	7.05765	7.23109	7.17321	7.0719	7.08601	6.96201	7.02763	7.02352	7.14193	6.51795	6.50304	6.35683	6.30718	6.35714	6.37437	6.95371	7.02057	7.12023	7.11038	6.99482	7.08273	90.475	-0.0259632
ENSMUSG00000000392	Fap	3.76722	3.76115	3.78973	3.78251	3.87465	3.80739	3.76307	3.79413	3.83643	3.84353	3.72104	3.71132	3.47361	3.51103	3.48383	3.47273	3.49399	3.44662	4.13804	4.08605	4.08964	4.11718	4.16699	4.16833	4.402	4.37344	4.40348	4.43781	4.32228	4.40278	3.93314	3.9335	4.01986	3.98549	3.7727	3.82152	3.79788	3.75863	3.49232	3.48352	4.10458	4.15084	4.39298	4.38762	3.93332	4.00267	13.7758	0.502044
ENSMUSG00000000399	Ndufa9	9.36263	9.41733	9.33699	9.54637	9.23474	9.32762	9.142	9.11651	9.00602	9.04626	9.12215	9.00584	9.02562	9.07954	9.02146	9.02752	8.98897	9.10361	9.74408	9.74918	9.85678	9.78312	9.86951	9.7614	10.008	9.94938	10.0778	9.96242	9.91089	10.0367	9.89581	9.95728	9.90492	9.86301	9.37232	9.36958	9.08818	9.05808	9.05258	9.01265	9.78335	9.80468	10.0117	9.97001	9.92654	9.88397	667.223	-0.0111071
ENSMUSG00000000402	Egfl6	NA	NA	NA	NA	NA	NA	NA	NA	NA	NA	NA	NA	NA	NA	NA	NA	NA	NA	NA	NA	NA	NA	NA	NA	2.01509	2.05641	2.09547	2.04261	2.04846	2.02106	NA	NA	NA	NA	NA	NA	NA	NA	NA	NA	NA	NA	2.05566	2.03738	NA	NA	NA	NA
ENSMUSG00000000416	Cttnbp2	8.28171	8.29206	8.21567	8.20049	8.29332	8.20135	8.22645	8.15696	8.25411	8.22144	8.03598	8.3625	8.39597	8.28444	8.21476	8.22775	8.37172	8.36294	8.88853	8.94594	8.75399	8.83537	8.82188	8.93248	8.9249	9.03921	8.97616	8.85187	8.81498	8.98653	8.99105	9.00099	8.93279	8.75091	8.26315	8.23172	8.21251	8.20664	8.34021	8.27141	8.86282	8.86324	8.98009	8.88446	8.99602	8.84185	303.497	-0.0511231
ENSMUSG00000000420	Galnt1	7.07226	7.08982	7.1172	7.07321	7.09723	7.13066	6.98709	6.91778	6.86855	6.99501	7.07748	7.00192	7.06587	7.06343	6.87538	7.09676	6.93878	7.09794	7.66278	7.65158	7.72203	7.67399	7.68226	7.74306	7.78723	7.8206	7.69325	7.80322	7.8068	7.88583	7.68585	7.7788	7.6638	7.66733	7.09309	7.10037	6.92447	7.0248	7.06465	6.97031	7.6788	7.69977	7.76703	7.83195	7.73232	7.66557	136.652	0.0245896
ENSMUSG00000000439	Mkrn2	5.89846	5.92217	5.88109	5.64194	5.88986	5.92855	5.84313	5.98036	5.86314	5.83345	5.98153	5.81374	5.8678	5.85151	5.95735	5.94598	5.96954	5.83527	6.71912	6.63789	6.70591	6.73703	6.7504	6.72514	6.60467	6.72476	6.72628	6.7035	6.72732	6.73882	6.69084	6.66221	6.68287	6.71116	5.90057	5.82012	5.89554	5.87624	5.85965	5.95762	6.68764	6.73752	6.68524	6.72321	6.67653	6.69702	55.8331	-0.23509
ENSMUSG00000000440	Pparg	3.979	3.95148	4.0031	4.02449	3.91247	4.01625	3.79502	3.7989	3.64201	3.84421	3.74892	3.76896	3.54373	3.69706	3.61532	3.63154	3.63518	3.67295	4.3011	4.26497	4.35506	4.23926	4.31046	4.35866	4.66553	4.56585	4.69147	4.6234	4.5815	4.63859	4.21486	4.17897	4.18987	4.18318	3.97786	3.9844	3.74531	3.78736	3.62039	3.62735	4.30705	4.3028	4.64095	4.6145	4.19692	4.18652	16.475	0.0539917
ENSMUSG00000000441	Raf1	6.73352	6.74042	6.57305	6.47947	6.81654	6.80781	6.78679	6.7719	6.81382	6.79233	6.73385	6.78595	6.74215	6.89095	6.69615	6.79008	6.80259	6.71846	7.40031	7.4025	7.4438	7.51741	7.57314	7.45933	7.61608	7.59607	7.71181	7.6453	7.63988	7.54666	7.43943	7.35108	7.4121	7.52557	6.68233	6.70127	6.79084	6.77071	6.81655	6.76294	7.41553	7.51663	7.64132	7.61061	7.39526	7.46883	101.548	0.0844302
ENSMUSG00000000489	Pdgfb	5.39829	5.42218	5.36414	5.29186	5.3477	5.38974	5.2683	5.62149	5.63806	5.38404	5.3643	5.58103	5.71088	5.65498	5.88691	5.67523	5.79365	5.86244	5.87241	5.85703	5.94023	5.92233	5.90454	5.96489	6.08883	6.05376	6.10981	6.23562	6.37704	6.29375	6.08248	6.06441	6.15063	6.20854	5.39487	5.3431	5.50929	5.44312	5.68293	5.78527	5.88989	5.93059	6.08413	6.30214	6.07345	6.17959	40.3766	-0.203578
ENSMUSG00000000530	Acvrl1	3.60906	3.622	3.59237	3.51978	3.57085	3.6457	2.3936	2.41796	2.36611	2.42029	2.40287	2.37732	3.58812	3.71572	3.64432	3.65385	3.73298	3.65029	3.86482	3.80229	3.84729	3.96394	3.86317	3.80651	4.40927	4.42271	4.44436	4.56884	4.51961	4.5371	4.55769	4.49846	4.49785	4.47256	3.60781	3.57878	2.39255	2.40016	3.65192	3.67705	3.83813	3.87787	4.42544	4.54185	4.52808	4.48521	11.1559	-0.301031
ENSMUSG00000000531	Grasp	7.72513	7.66308	7.55211	7.74501	7.72473	7.61565	7.55314	8.00074	8.00369	7.67645	7.74089	8.10018	7.50299	7.56458	7.68651	7.57318	7.64989	7.74056	8.12395	8.19817	8.20221	8.20432	8.19599	8.18935	8.16641	8.23627	8.34111	8.37649	8.49378	8.4078	8.50377	8.40988	8.55546	8.68117	7.64677	7.69513	7.85252	7.83917	7.53379	7.63653	8.17478	8.19656	8.24793	8.42602	8.45683	8.61832	205.11	0.0795497
ENSMUSG00000000532	Acvr1b	9.15891	9.07377	9.07934	9.05332	8.99861	9.00548	8.91477	9.14116	8.90337	8.95418	8.98403	8.82047	8.71266	8.74839	8.84909	8.80487	8.79125	8.96742	9.6094	9.61148	9.54978	9.58148	9.60415	9.51923	9.61311	9.59814	9.70756	9.717	9.64866	9.61498	9.71188	9.64754	9.76542	9.71587	9.104	9.01914	8.98643	8.91956	8.73052	8.81507	9.59022	9.56829	9.6396	9.66021	9.67971	9.74064	535.001	-0.141687
ENSMUSG00000000538	Tom1l2	9.85178	9.7081	9.72348	9.4347	9.76055	9.76432	9.61306	9.85273	9.64256	9.70195	9.65671	9.4955	9.76003	9.6854	9.73189	9.71804	9.62484	9.69728	10.5284	10.5399	10.503	10.5633	10.574	10.5587	10.4348	10.5632	10.3858	10.4999	10.5323	10.5624	10.5513	10.4396	10.6488	10.6289	9.76112	9.65319	9.70278	9.61805	9.72271	9.69159	10.5238	10.5653	10.4613	10.5315	10.4955	10.6389	838.573	-0.137697
ENSMUSG00000000552	Zfp385a	6.77266	6.67843	6.48506	6.40969	6.60026	6.63706	6.53848	6.86391	6.6995	6.58319	6.64466	6.64028	6.59913	6.72413	6.7713	6.6381	6.72597	6.82743	7.44804	7.3997	7.52382	7.41108	7.44929	7.37956	7.62547	7.60831	7.85427	7.7764	7.81529	7.75995	7.82393	7.82688	7.74407	7.79085	6.64538	6.549	6.70063	6.62271	6.66163	6.71179	7.45718	7.41331	7.69602	7.78388	7.8254	7.76746	95.2242	-0.241829
ENSMUSG00000000555	Itga5	2.37847	2.34379	2.36387	2.3226	2.34505	2.37423	2.23412	2.30863	2.25595	2.27558	2.33651	2.26443	2.41914	2.45017	2.40774	2.37962	2.3468	2.38303	3.06408	3.01598	3.03728	3.07637	3.05119	2.98887	3.71519	3.68299	3.73146	3.80703	3.86951	3.83302	4.05949	4.0405	3.97967	4.06574	2.36204	2.3473	2.26623	2.29218	2.43465	2.37805	3.03911	3.03881	3.70988	3.83652	4.05	4.02271	4.73056	-0.341261
ENSMUSG00000000560	Gabra2	8.54462	8.76766	8.84257	8.71065	8.87671	8.72896	8.72793	8.22974	8.59534	8.78564	8.61438	8.81305	8.67714	8.82571	8.63531	8.69736	8.65005	8.48558	9.31896	9.26181	9.19988	9.23771	9.28003	9.30092	9.87313	9.7457	9.70003	9.51767	9.53466	9.69999	9.46552	9.61806	9.22923	8.96866	8.71828	8.7721	8.51767	8.73769	8.75143	8.66091	9.26022	9.27289	9.77295	9.58411	9.54179	9.09895	431.293	0.0896852
ENSMUSG00000000563	Atp5pb	9.3953	9.48211	9.45899	9.5598	9.4774	9.31668	9.1269	8.70058	9.06708	9.14489	9.03165	9.0663	9.02753	9.21133	9.07514	9.11737	9.06635	9.06234	9.78388	9.76726	9.76794	9.74514	9.91703	9.77446	10.0152	10.1265	9.98986	9.91883	10.0321	10.1172	9.93844	9.98292	10.1528	9.91651	9.44547	9.45129	8.96485	9.08095	9.11943	9.08628	9.77303	9.81221	10.0438	10.0227	9.96068	10.0347	702.001	0.00370065
ENSMUSG00000000567	Sox9	4.51077	4.41776	4.43858	4.36841	4.35771	4.46901	4.84733	4.84078	4.867	4.89844	4.77121	4.83523	4.53627	4.53881	4.57966	4.56941	4.65308	4.64915	5.61551	5.6496	5.55224	5.59273	5.64459	5.54553	5.77902	5.75343	5.7006	5.931	5.95298	5.84325	5.83772	5.77476	5.73869	5.81722	4.4557	4.39838	4.8517	4.83496	4.53754	4.60071	5.60578	5.59429	5.74435	5.90908	5.80624	5.77795	20.8986	-0.38214
ENSMUSG00000000568	Hnrnpd	9.13282	9.14684	9.24261	9.21123	9.22752	9.27969	9.15407	8.68402	8.96853	9.0593	8.98834	8.73795	9.14939	9.15447	8.95149	9.07852	9.058	8.83233	9.79489	9.6892	9.70062	9.70756	9.65957	9.86045	10.0049	9.92658	9.90986	9.69699	9.81126	9.98722	9.74038	9.87383	9.74872	9.63818	9.17409	9.23948	8.93554	8.92853	9.15193	9.02934	9.72823	9.74253	9.9471	9.83182	9.80711	9.69345	591.811	0.107577
ENSMUSG00000000581	C1d	7.49564	7.63472	7.54928	7.54056	7.62985	7.57658	7.58136	7.29932	7.45431	7.47019	7.41333	7.36818	7.95304	7.6974	7.48805	7.58133	7.52524	7.57612	8.2694	8.19399	8.22154	8.27271	8.19426	8.30537	8.39468	8.3499	8.17679	8.19648	8.28132	8.34136	8.32814	8.38336	8.33745	8.28866	7.55988	7.58233	7.445	7.41723	7.82522	7.53154	8.22831	8.25745	8.30712	8.27306	8.35575	8.31306	189.98	0.0497558
ENSMUSG00000000594	Gm2a	6.51297	6.47655	6.55196	6.27173	6.43687	6.515	6.66488	6.5541	6.52734	6.63843	6.66533	6.56526	6.36343	6.40794	6.49812	6.52102	6.33461	6.41058	7.33456	7.27542	7.41004	7.3705	7.22283	7.27626	7.39004	7.31067	7.30519	7.4284	7.4251	7.38604	7.45025	7.35751	7.41794	7.4365	6.51383	6.40787	6.58211	6.62301	6.38568	6.45125	7.34001	7.28986	7.3353	7.41318	7.40388	7.42722	86.3914	-0.250026
ENSMUSG00000000600	Krit1	7.48791	7.54622	7.6757	7.68975	7.60023	7.67832	7.54134	7.12519	7.47744	7.52401	7.31288	7.34354	7.6473	7.50409	7.46884	7.56765	7.51618	7.327	8.02311	8.06138	7.96312	8.02583	8.15176	8.26815	8.49155	8.30145	8.1883	8.06236	8.26043	8.38228	8.33574	8.38814	7.98786	7.91436	7.56994	7.6561	7.38132	7.39348	7.57569	7.51756	8.01587	8.14858	8.3271	8.23502	8.36194	7.95111	197.598	0.164896
ENSMUSG00000000605	Clcn4	9.78797	9.81216	9.83469	9.80585	9.88763	9.80008	9.5883	9.85902	9.69693	9.71651	9.76411	9.80633	9.55572	9.51179	9.54707	9.56321	9.50586	9.61941	10.3364	10.3616	10.5254	10.3075	10.3553	10.3143	10.5255	10.4689	10.6444	10.5935	10.5559	10.5135	10.3521	10.4782	10.3726	10.4293	9.81161	9.83119	9.71475	9.76232	9.53375	9.53871	10.4078	10.3257	10.5462	10.5543	10.4152	10.401	905.053	0.0334577
ENSMUSG00000000627	Sema4f	6.88939	6.82251	6.79402	6.99322	6.7875	6.84697	6.6451	6.89985	6.62301	6.61705	6.75964	6.66589	6.47529	6.5342	6.56178	6.71736	6.67327	6.51538	7.38485	7.33435	7.38208	7.38156	7.49544	7.39553	7.56503	7.43849	7.60276	7.5308	7.51113	7.46824	7.42332	7.38622	7.4308	7.5228	6.83531	6.8759	6.72265	6.68086	6.50475	6.6508	7.36709	7.42418	7.53543	7.50339	7.40477	7.4768	117.932	0.0751688
ENSMUSG00000000628	Hk2	NA	NA	NA	NA	NA	NA	NA	NA	NA	NA	NA	NA	NA	NA	NA	NA	NA	NA	2.0885	2.0313	2.02921	2.05245	2.06102	2.0472	2.79297	2.75597	2.79521	2.81212	2.83887	2.80095	3.29239	3.27659	3.32138	3.37912	NA	NA	NA	NA	NA	NA	2.04967	2.05356	2.78138	2.81731	3.28449	3.35025	NA	NA
ENSMUSG00000000631	Myo18a	8.82984	8.68925	8.57673	8.52367	8.66458	8.52899	8.61722	8.9168	8.68544	8.53449	8.53398	8.6171	8.40261	8.26255	8.37095	8.48474	8.50269	8.5392	9.15524	9.2122	9.17681	9.1328	9.28487	9.07899	9.14659	8.91462	9.14605	9.21256	9.05078	8.96295	9.04744	9.14228	8.87458	9.25411	8.69861	8.57241	8.73982	8.56186	8.33258	8.45279	9.18142	9.16555	9.06909	9.07543	9.09486	9.06434	398.485	-0.211831
ENSMUSG00000000632	Sez6	10.5024	10.286	10.2561	10.2673	10.194	10.474	10.0295	10.4247	9.98589	10.037	10.2644	9.98218	9.7141	9.77366	9.90951	9.7799	10.0052	10.0447	11.0134	10.8607	11.1227	10.8917	10.8343	10.6118	10.9468	10.8391	11.3105	11.2347	11.2448	10.9891	11.1389	11.2106	11.0208	11.2135	10.3482	10.3118	10.1467	10.0945	9.74388	9.8982	10.9989	10.7793	11.0322	11.1562	11.1747	11.1172	1293.98	-0.0499887
ENSMUSG00000000682	Cd52	2.42773	2.42601	2.41237	2.47337	2.43862	2.424	1.74519	1.65157	1.64163	1.74329	1.64054	1.64323	2.10049	2.05668	2.09155	2.05678	2.06303	2.05343	2.46785	2.46002	2.47741	2.48202	2.5061	2.49428	3.16944	3.14465	3.09771	3.18084	3.18307	3.29606	3.50417	3.55382	3.559	3.56482	2.42204	2.44533	1.67946	1.67569	2.07859	2.07045	2.46843	2.49413	3.13727	3.21999	3.52899	3.56191	5.89849	0.492076
ENSMUSG00000000708	Kat2b	2.48566	2.49085	2.46271	2.47351	2.53065	2.46465	3.02512	3.07159	3.19058	3.00794	3.05039	3.22232	3.05313	2.96252	2.96048	2.97764	2.96711	2.93634	3.68237	3.68348	3.65418	3.62257	3.62284	3.6699	4.06188	3.99637	4.00027	4.02984	4.00487	4.01221	3.74488	3.73113	3.76374	3.80751	2.47974	2.4896	3.09576	3.09355	3.00783	2.96841	3.67334	3.63844	4.01951	4.01564	3.738	3.78563	5.43047	0.235099
ENSMUSG00000000711	Rab5b	6.51177	6.5906	6.66541	6.5081	6.5792	6.55964	6.26557	6.16664	6.28357	6.45132	6.31033	6.41411	6.114	6.4461	6.12314	6.24561	6.27131	6.25198	6.87749	6.87331	6.90955	6.8969	6.83658	6.9236	7.37195	7.24661	7.41849	7.19954	7.19262	7.17637	7.16109	7.18706	7.15174	7.12769	6.58926	6.54898	6.23859	6.39192	6.28005	6.21336	6.88678	6.8857	7.34568	7.18951	7.17408	7.13971	94.5629	-0.0946679
ENSMUSG00000000732	Icosl	NA	NA	NA	NA	NA	NA	NA	NA	NA	NA	NA	NA	NA	NA	NA	NA	NA	NA	NA	NA	NA	NA	NA	NA	NA	NA	NA	NA	NA	NA	2.81677	2.79957	2.82086	2.8601	NA	NA	NA	NA	NA	NA	NA	NA	NA	NA	2.80817	2.84048	NA	NA
ENSMUSG00000000738	Spg7	6.64749	6.68305	6.61052	6.66199	6.63582	6.52931	6.34637	6.79175	6.51943	6.49086	6.61519	6.5089	6.58213	6.35165	6.51518	6.33234	6.36897	6.33459	7.14101	7.14678	7.16909	7.12877	7.20177	7.21673	7.15502	7.21074	7.20472	7.26481	7.23343	7.22118	7.37157	7.21999	7.23763	7.27983	6.64702	6.60904	6.55252	6.53832	6.46689	6.4055	7.15229	7.18242	7.19016	7.23981	7.29578	7.25873	99.5008	-0.111169
ENSMUSG00000000740	Rpl13	2.43809	2.41086	2.40597	2.41573	2.44814	2.43402	2.51175	2.44463	2.56917	2.46019	2.5872	2.57459	3.63289	3.44738	3.47012	3.49255	3.50084	3.51865	3.13947	3.22019	3.1899	3.21551	3.16503	3.22843	2.9914	2.97471	2.97654	2.98543	3.04449	3.02139	3.38688	3.40052	3.38131	3.37289	2.41831	2.43263	2.50851	2.54066	3.54014	3.48784	3.18319	3.20299	2.98088	3.0171	3.3937	3.3771	5.2205	0.344161
ENSMUSG00000000743	Chmp1a	7.24689	7.16777	7.04025	7.01909	7.12897	7.25653	7.09861	7.2943	7.22316	6.94851	7.10591	6.79228	7.1458	6.92786	6.93844	6.9141	6.89607	7.00362	7.59268	7.60678	7.75342	7.68725	7.64578	7.58039	7.84337	7.77998	7.93959	7.91962	7.83869	7.77536	7.85594	7.90552	7.95786	7.9348	7.15164	7.13486	7.20536	6.9489	7.03683	6.9162	7.65096	7.63781	7.85432	7.84456	7.88073	7.94633	140.307	-0.0198128
ENSMUSG00000000751	Rpa1	8.03277	7.84068	7.88797	7.92786	7.85862	7.96921	7.75696	7.73144	7.7887	7.71225	7.73785	7.71016	7.64545	7.6391	7.63636	7.72526	7.52848	7.62695	8.52998	8.39073	8.42038	8.42015	8.46817	8.40468	8.46715	8.5667	8.56044	8.44276	8.49041	8.53194	8.65681	8.57197	8.66212	8.70607	7.92047	7.91856	7.75903	7.72009	7.64228	7.63003	8.44703	8.431	8.53143	8.48837	8.61439	8.68409	242.791	-0.00913842
ENSMUSG00000000753	Serpinf1	1.78839	1.77482	1.81949	1.84624	1.81979	1.8635	NA	NA	NA	NA	NA	NA	NA	NA	NA	NA	NA	NA	2.61338	2.63014	2.59403	2.62066	2.62219	2.60565	3.2601	3.28834	3.32699	3.35272	3.32928	3.24919	3.70025	3.68924	3.71761	3.70276	1.79423	1.84318	NA	NA	NA	NA	2.61252	2.61617	3.29181	3.3104	3.69474	3.71019	3.93511	1.74886
ENSMUSG00000000759	Tubgcp3	6.48873	6.48451	6.45923	6.25794	6.51944	6.44506	6.41548	6.37825	6.41159	6.37392	6.31647	6.334	6.45003	6.49902	6.50535	6.45545	6.57081	6.52923	7.21984	7.24727	7.25754	7.36355	7.33695	7.39892	7.16137	7.28269	7.15298	7.31383	7.2751	7.391	7.26282	7.09712	7.32958	7.26048	6.47749	6.40748	6.40177	6.34146	6.47453	6.51054	7.24155	7.36647	7.19901	7.32664	7.17997	7.29503	85.1028	-0.151691
ENSMUSG00000000766	Oprm1	4.72314	4.73193	4.73299	4.90943	4.74284	4.73861	4.52817	4.51628	4.39698	4.61837	4.47724	4.45046	4.33383	4.33781	4.2284	4.34298	4.33913	4.22798	5.41567	5.37941	5.39488	5.38791	5.38465	5.33251	5.71558	5.70323	5.71348	5.69769	5.85943	5.72355	5.50605	5.42296	5.4289	5.43494	4.72935	4.79696	4.48048	4.51536	4.33582	4.30351	5.39665	5.36836	5.71076	5.76022	5.46451	5.43192	29.2384	0.363173
ENSMUSG00000000776	Polr3d	5.71253	5.716	5.78325	6.0592	5.72565	5.70181	5.66173	5.84971	5.70929	5.6753	5.62463	5.98566	5.76442	5.56303	5.60105	5.51502	5.49463	5.62454	6.22359	6.23868	6.22512	6.20733	6.18416	6.10791	6.33787	6.32134	6.31808	6.35388	6.36036	6.30468	6.31458	6.29348	6.2743	6.32866	5.73726	5.82889	5.74024	5.76186	5.66372	5.5369	6.22913	6.16646	6.32576	6.33964	6.30403	6.30148	59.7168	0.331862
ENSMUSG00000000782	Tcf7	NA	NA	NA	NA	NA	NA	NA	NA	NA	NA	NA	NA	NA	NA	NA	NA	NA	NA	NA	NA	NA	NA	NA	NA	2.17563	2.17383	2.18481	2.14209	2.15722	2.16957	NA	NA	NA	NA	NA	NA	NA	NA	NA	NA	NA	NA	2.17809	2.15629	NA	NA	NA	NA
ENSMUSG00000000787	Ddx3x	10.2229	10.1282	10.3397	10.5107	10.1478	10.4131	10.2732	9.9064	9.81236	10.2249	10.0547	9.70863	10.1221	10.2925	10.1571	10.0858	10.2733	10.0478	10.8659	10.9963	10.9593	11.0442	10.9258	10.8602	10.9797	11.1452	10.8206	10.6197	10.8402	10.9846	10.7644	10.7432	10.6631	10.6503	10.2303	10.3572	9.99731	9.99606	10.2073	10.1721	10.9405	10.9434	10.9818	10.8148	10.7538	10.6567	1269.33	0.191149
ENSMUSG00000000792	Slc5a5	4.42534	4.53893	4.42865	4.32527	4.50829	4.49732	4.77966	5.00483	4.69257	4.70909	4.94564	4.7503	4.53179	4.51704	4.57893	4.56704	4.46739	4.55729	5.53786	5.62489	5.72827	5.62744	5.59499	5.53323	5.65563	5.58408	5.71631	5.76051	5.71869	5.69356	5.9189	5.93994	5.96117	5.95219	4.46431	4.44363	4.82569	4.80168	4.52441	4.53779	5.63034	5.58522	5.65201	5.72426	5.92942	5.95668	20.3846	-0.129096
ENSMUSG00000000794	Kcnn3	4.71364	4.73231	4.76471	4.72487	4.66478	4.73432	4.83163	4.72306	4.92106	4.68494	4.86624	4.90448	4.70382	4.69449	4.61405	4.60159	4.63158	4.77534	5.30079	5.20524	5.24918	5.18592	5.17476	5.18624	5.39583	5.355	5.44929	5.53396	5.50436	5.32398	5.68328	5.61218	5.6173	5.6815	4.73688	4.70799	4.82525	4.81856	4.69915	4.61574	5.25174	5.1823	5.40004	5.4541	5.64773	5.6494	26.5527	-0.170726
ENSMUSG00000000804	Usp32	8.79727	8.83182	8.83328	8.82198	8.85136	8.71671	8.65852	8.22054	8.62029	8.60317	8.36184	8.69516	8.74523	8.70244	8.65356	8.6394	8.70928	8.55988	9.17832	9.26559	9.24629	9.33854	9.29785	9.30296	9.61253	9.40433	9.25564	9.3416	9.42639	9.49202	9.42534	9.38461	9.21271	9.27048	8.82079	8.79668	8.49978	8.55339	8.72383	8.66741	9.23007	9.31311	9.42417	9.42	9.40498	9.24159	449.091	-0.0408344
ENSMUSG00000000805	Car4	6.39984	6.41262	6.4714	6.33746	6.48529	6.33777	6.36639	6.4588	6.55958	6.34301	6.35513	6.16264	6.1249	6.09271	6.03422	6.18348	6.08678	5.99192	6.95294	6.93611	6.90726	6.83962	6.85131	6.89402	6.93474	6.81841	6.91391	6.92341	6.88585	6.82108	6.95252	6.99716	7.05341	7.0285	6.42795	6.38684	6.46159	6.28693	6.10881	6.10149	6.93211	6.86165	6.88902	6.87678	6.97484	7.04095	84.3544	-0.0938789
ENSMUSG00000000811	Txnrd3	3.685	3.72411	3.73362	3.64198	3.74354	3.80468	3.93095	3.75122	3.80586	3.70737	3.71767	3.66176	3.83813	3.85126	3.76552	3.81552	3.82651	3.74917	4.85698	4.89397	4.82407	4.89482	4.79058	4.89218	4.49224	4.45604	4.47788	4.46892	4.49319	4.5707	4.30372	4.27501	4.33924	4.35223	3.71425	3.73007	3.82934	3.6956	3.8447	3.80251	4.85834	4.85919	4.47539	4.51093	4.28937	4.34573	12.2745	0.195374
ENSMUSG00000000823	Zfp512b	6.81376	6.6657	6.60673	6.54597	6.61905	6.74632	6.76477	6.843	6.50061	6.57848	6.7512	6.52599	6.59745	6.47919	6.43888	6.62765	6.66564	6.6465	7.52881	7.59595	7.47491	7.43215	7.4245	7.40054	7.36404	7.20561	7.37912	7.41521	7.34349	7.30347	7.22419	7.31119	7.22716	7.19052	6.6954	6.63711	6.70279	6.61856	6.53832	6.57739	7.53322	7.41906	7.31626	7.35405	7.26769	7.20884	100.51	-0.134661
ENSMUSG00000000826	Dnajc5	9.58168	9.47803	9.52738	9.17725	9.48004	9.66244	9.43937	9.68881	9.55203	9.40872	9.5223	9.42737	9.77156	9.45962	9.51131	9.5339	9.59568	9.54663	10.3349	10.4017	10.2114	10.4116	10.316	10.3552	10.2415	10.3404	10.2358	10.4206	10.4358	10.3005	10.3036	10.3778	10.3745	10.3837	9.52903	9.43991	9.56007	9.4528	9.61559	9.54696	10.316	10.3609	10.2725	10.3856	10.3407	10.3791	719.722	-0.0984604
ENSMUSG00000000827	Tpd52l2	7.34887	7.3337	7.36396	7.45815	7.41955	7.46284	7.14391	7.31114	7.22881	7.15308	7.24895	7.03377	7.00957	7.11956	7.34326	7.19738	7.17124	7.33376	7.86118	7.92302	7.87724	7.89058	7.83898	7.89271	7.95527	8.02146	8.05481	8.01021	7.88126	8.03386	8.03672	8.1196	8.26595	8.26998	7.34884	7.44685	7.22795	7.14527	7.06457	7.23729	7.88715	7.87409	8.01051	7.97511	8.07816	8.26797	169.673	0.201543
ENSMUSG00000000838	Fmr1	8.79789	8.77606	8.93515	8.82064	8.82962	8.93538	8.84036	8.32851	8.66819	8.84936	8.66638	8.69615	8.77676	8.72783	8.69059	8.69791	8.67114	8.57158	9.40401	9.29916	9.27675	9.23646	9.22052	9.41594	9.55381	9.3958	9.37744	9.33379	9.40415	9.52788	9.2445	9.41034	9.13557	8.97654	8.83637	8.86188	8.61235	8.73729	8.75229	8.68655	9.32664	9.29097	9.44235	9.42194	9.32742	9.05606	461.906	0.0488103
ENSMUSG00000000861	Bcl11a	9.13561	9.14438	9.09026	8.90104	9.08523	9.06094	8.76736	8.97995	8.83024	8.88151	8.85958	9.003	8.77206	8.76122	8.96784	8.83613	8.8291	8.87433	9.61206	9.57509	9.59571	9.52796	9.56736	9.59785	9.6725	9.6498	9.7191	9.7957	9.77438	9.79826	9.70938	9.79883	9.80196	9.85441	9.12342	9.01574	8.85919	8.91469	8.76664	8.87769	9.59429	9.56439	9.68046	9.78945	9.7541	9.82819	536.754	-0.153227
ENSMUSG00000000876	Pxmp4	4.65438	4.69734	4.57686	4.7296	4.61287	4.51689	4.09573	4.15745	4.20878	4.18188	4.24169	4.20682	4.34585	4.38043	4.4126	4.41204	4.36608	4.3361	5.13818	5.06986	5.1316	5.1653	5.2106	5.18148	5.0722	5.10098	5.07816	5.17385	5.12937	5.14781	5.05519	5.10535	5.09407	5.13886	4.64286	4.61979	4.15399	4.21013	4.36314	4.39691	5.11321	5.18579	5.08378	5.15034	5.08027	5.11646	26.1882	-0.154216
ENSMUSG00000000881	Dlg3	9.7146	9.71125	9.62905	9.65924	9.65194	9.71637	9.54952	9.82342	9.63593	9.65463	9.67574	9.64592	9.71638	9.47441	9.64042	9.53287	9.49754	9.6782	10.3475	10.3775	10.4673	10.1926	10.2993	10.2306	10.2959	10.2072	10.3588	10.2944	10.305	10.2334	10.2813	10.3126	10.2455	10.3094	9.68497	9.67585	9.66962	9.65876	9.5954	9.55695	10.3974	10.2408	10.2873	10.2776	10.2969	10.2774	820.586	-0.0135438
ENSMUSG00000000884	Gnb1l	2.41059	2.4192	2.45374	2.4244	2.43896	2.45954	2.42623	2.43527	2.36648	2.37224	2.40341	2.37779	2.77254	2.7304	2.7365	2.76899	2.76356	2.80132	2.96687	2.98346	2.96471	2.95885	2.95155	2.95265	3.162	3.14683	3.20379	3.1979	3.16742	3.14542	3.16772	3.20436	3.16533	3.18889	2.42784	2.44097	2.40932	2.38448	2.75147	2.75635	2.97168	2.95435	3.17087	3.17025	3.18604	3.17711	5.32999	0.325242
ENSMUSG00000000901	Mmp11	NA	NA	NA	NA	NA	NA	NA	NA	NA	NA	NA	NA	NA	NA	NA	NA	NA	NA	NA	NA	NA	NA	NA	NA	NA	NA	NA	NA	NA	NA	2.28385	2.3043	2.33795	2.28316	NA	NA	NA	NA	NA	NA	NA	NA	NA	NA	2.29407	2.31055	NA	NA
ENSMUSG00000000902	Smarcb1	8.89627	8.8948	8.82393	9.082	8.82144	8.9151	8.72338	8.73266	8.55449	8.64351	8.63652	8.53895	8.73189	8.65293	8.66832	8.59263	8.62503	8.76192	9.39892	9.30226	9.3006	9.41104	9.28236	9.31676	9.43751	9.59022	9.51624	9.36068	9.34064	9.43513	9.50828	9.44882	9.57554	9.54708	8.87167	8.93951	8.67017	8.60633	8.69241	8.62866	9.33393	9.33672	9.51466	9.37882	9.47855	9.56131	483.549	0.0983307
ENSMUSG00000000915	Hip1r	7.86519	7.64381	7.79202	7.62941	7.70735	7.91611	7.71503	8.02193	7.68242	7.72481	7.79981	7.57219	7.5426	7.60445	7.73335	7.62481	7.73337	7.82312	8.57425	8.65297	8.56833	8.62079	8.52511	8.43447	8.34212	8.49715	8.39747	8.57256	8.49385	8.48336	8.46105	8.42449	8.47693	8.43918	7.76701	7.75095	7.80646	7.69893	7.57353	7.69718	8.59852	8.52679	8.41225	8.51659	8.44277	8.45805	216.506	-0.00824045
ENSMUSG00000000916	Nsun5	3.34432	3.36766	3.38559	3.42295	3.36465	3.32012	3.2439	3.41081	3.3765	3.38978	3.40665	3.28321	3.09365	3.11382	3.20494	3.11825	3.0744	3.06662	3.68331	3.69974	3.7226	3.67001	3.77012	3.68893	4.25843	4.2184	4.33814	4.24933	4.18551	4.2182	3.78142	3.76649	3.75718	3.79987	3.36586	3.36924	3.34373	3.35988	3.10373	3.13253	3.70188	3.70969	4.27166	4.21768	3.77396	3.77853	11.133	0.0235325
ENSMUSG00000000934	Top1mt	3.69036	3.70009	3.63927	3.58089	3.64535	3.68904	3.79066	3.80851	3.78416	3.70761	3.79531	3.77915	3.15168	3.19626	3.20092	3.19589	3.17871	3.20524	4.6409	4.63546	4.65178	4.66039	4.59739	4.60435	4.42559	4.49041	4.48831	4.46916	4.43499	4.49761	4.47471	4.41204	4.45622	4.45871	3.67657	3.63843	3.79444	3.76069	3.17397	3.19184	4.64271	4.62071	4.4681	4.46725	4.44337	4.45747	11.6312	-0.398277
ENSMUSG00000000957	Mmp14	NA	NA	NA	NA	NA	NA	2.15929	2.20744	2.20647	2.11912	2.27954	2.41145	NA	NA	NA	NA	NA	NA	2.38996	2.37394	2.38378	2.39678	2.39271	2.37159	3.21191	3.25847	3.20626	3.27241	3.26524	3.23199	3.08585	3.06802	3.08664	3.07222	NA	NA	2.19107	2.27003	NA	NA	2.38256	2.38703	3.22554	3.25655	3.07694	3.07943	NA	NA
ENSMUSG00000000959	Oxa1l	6.85304	6.84296	6.77894	6.75117	6.83998	6.84463	6.74231	6.87481	6.77282	6.81067	6.8522	6.80381	6.85672	6.75811	6.72492	6.8135	6.815	6.84393	7.59518	7.48901	7.5171	7.45932	7.44987	7.47773	7.55391	7.53887	7.62067	7.52052	7.63795	7.53662	7.55339	7.68611	7.66992	7.71122	6.82498	6.81193	6.79665	6.82223	6.80742	6.78447	7.53376	7.4623	7.57115	7.56503	7.61975	7.69057	112.015	-0.0189357
ENSMUSG00000000976	Heatr6	5.01203	4.96926	4.93954	4.94815	4.99704	4.9752	4.37557	4.3847	4.50435	4.46641	4.38391	4.26459	4.69238	4.76798	4.75117	4.77181	4.75437	4.74915	5.47803	5.48724	5.44194	5.38391	5.49291	5.45793	5.77238	5.64623	5.68325	5.74621	5.69362	5.74185	5.50172	5.54338	5.47322	5.54915	4.97361	4.97346	4.42154	4.37164	4.73018	4.75911	5.46907	5.44491	5.70062	5.72723	5.52255	5.51118	31.052	0.00428653
ENSMUSG00000000983	Wfdc18	2.98063	3.0226	3.00495	2.99876	2.9637	3.03472	2.32192	2.26367	2.32288	2.29389	2.27927	2.23411	2.701	2.71876	2.81047	2.64112	2.66297	2.68885	3.3274	3.3045	3.36592	3.31439	3.28023	3.29273	3.29777	3.3118	3.32383	3.29272	3.2542	3.30485	3.02789	2.98947	3.02301	3.00859	3.00273	2.99906	2.30282	2.26909	2.70988	2.70486	3.33261	3.29578	3.31114	3.28392	3.00868	3.0158	7.99276	-0.0527048
ENSMUSG00000001014	Icam4	NA	NA	NA	NA	NA	NA	NA	NA	NA	NA	NA	NA	NA	NA	NA	NA	NA	NA	2.0326	1.99223	2.0509	2.01216	2.00258	2.02772	2.47866	2.47914	2.4335	2.50606	2.4352	2.44682	2.48647	2.51624	2.51432	2.49731	NA	NA	NA	NA	NA	NA	2.02524	2.01415	2.46377	2.46269	2.50135	2.50582	NA	NA
ENSMUSG00000001016	Ilf2	9.03275	9.08895	9.04168	9.16049	9.0166	9.10973	8.91476	8.76313	8.905	8.91932	8.90598	8.88185	8.95747	8.9877	8.96623	8.91039	8.94605	8.79525	9.63018	9.53459	9.70426	9.59555	9.56185	9.70252	9.76012	9.85129	9.76804	9.69381	9.75633	9.76326	9.82803	9.71686	9.7448	9.81994	9.05446	9.09561	8.86096	8.90238	8.97258	8.94089	9.62301	9.61998	9.79315	9.7378	9.77245	9.78237	541.035	0.0580349
ENSMUSG00000001017	Chtop	8.59502	8.57117	8.56454	8.4473	8.49501	8.6011	8.54203	8.38037	8.49491	8.50881	8.36883	8.4387	8.57437	8.46592	8.41864	8.5458	8.46143	8.57655	9.29844	9.20001	9.16115	9.27147	9.1618	9.08243	9.29874	9.3201	9.28816	9.27846	9.26962	9.26693	9.12041	9.22173	9.17294	9.16439	8.57691	8.51447	8.47243	8.43878	8.52015	8.47529	9.21987	9.1719	9.30233	9.27167	9.17107	9.16867	373.012	-0.0914856
ENSMUSG00000001018	Snapin	5.48371	5.41215	5.56929	5.79712	5.43471	5.53804	5.42633	5.52246	5.46782	5.5108	5.56589	5.82068	5.10814	4.97393	4.89077	5.03029	4.90107	4.96236	6.25184	6.21728	6.15072	6.26879	6.23178	6.15996	6.02448	5.93194	6.00699	6.09156	6.06298	6.09997	6.22512	6.28417	6.3079	6.26318	5.48839	5.58996	5.4722	5.63246	5.04104	4.94071	6.20661	6.22018	5.98781	6.08484	6.25464	6.28554	50.919	0.404578
ENSMUSG00000001025	S100a6	5.74235	5.87099	5.91368	5.87486	5.89502	5.8571	5.67295	5.68241	5.79818	5.85923	5.78624	5.71492	5.56089	5.55875	5.58693	5.55966	5.4208	5.42904	6.1794	6.20033	6.16161	6.16891	6.20836	6.31707	6.63679	6.66633	6.57034	6.38983	6.55186	6.46878	6.29649	6.43515	6.39367	6.54602	5.84234	5.87566	5.71785	5.7868	5.55982	5.52246	6.18044	6.23145	6.62449	6.47016	6.36582	6.46985	58.542	0.109436
ENSMUSG00000001034	Mapk7	3.43319	3.50938	3.40932	3.51538	3.45325	3.46985	3.15395	3.31606	3.12193	3.22153	3.22412	3.13743	3.39984	3.34778	3.43091	3.36582	3.32864	3.35567	4.48998	4.5356	4.51091	4.54475	4.52768	4.46732	4.23388	4.20042	4.25542	4.29868	4.24308	4.17144	4.11734	4.0818	4.12423	4.11852	3.45063	3.47949	3.19731	3.19436	3.37381	3.37512	4.51216	4.51325	4.22991	4.23773	4.09957	4.12137	11.628	0.309374
ENSMUSG00000001036	Epn2	8.47359	8.50503	8.34423	8.55484	8.33096	8.39901	8.23362	8.42202	8.43705	8.27747	8.16506	8.44085	8.05122	8.08927	8.18105	8.20682	8.25036	8.21852	8.99138	8.87372	8.98047	8.88311	8.78178	8.85429	8.95516	9.05296	9.05047	9.03186	9.10001	9.02083	9.25723	9.17292	9.217	9.23049	8.44095	8.42827	8.36423	8.29446	8.07024	8.21274	8.94853	8.83973	9.01953	9.0509	9.21507	9.22374	348.605	-0.04034
ENSMUSG00000001039	B9d1	4.90796	4.82197	4.86099	4.79598	4.79455	4.77619	5.04898	4.90838	4.88024	4.86374	4.88501	4.92699	4.35277	4.43335	4.5225	4.51478	4.38278	4.56679	5.514	5.38253	5.44201	5.42549	5.39788	5.34692	5.31829	5.39326	5.42336	5.45529	5.40948	5.36964	5.58084	5.55567	5.64044	5.66806	4.86364	4.78891	4.94587	4.89192	4.39306	4.47335	5.44618	5.3901	5.3783	5.41147	5.56825	5.65425	28.1557	-0.422546
ENSMUSG00000001052	Sec24b	8.34943	8.2451	7.96627	8.1635	8.24478	8.09516	7.91893	7.95066	7.97342	7.96158	7.90267	7.79172	7.79146	7.89211	7.89762	7.91041	7.99815	7.82625	8.64879	8.76291	8.68881	8.7804	8.90815	8.81425	8.73484	8.72001	8.77144	8.6834	8.73718	8.7272	8.81028	8.64489	8.71014	8.82159	8.18693	8.16782	7.94767	7.88532	7.84179	7.93539	8.70017	8.83427	8.7421	8.71593	8.72759	8.76587	291.216	-0.0545646
ENSMUSG00000001053	N4bp3	3.80182	3.86338	3.76403	3.69825	3.7319	3.8294	3.97471	4.10002	4.25369	3.9063	3.97466	4.24156	3.86716	3.93002	3.98338	3.82537	3.94042	4.04933	4.87253	4.83886	4.87776	4.91086	4.82957	4.88104	4.40578	4.4698	4.48364	4.43452	4.46719	4.56833	5.08002	5.08463	5.10983	5.23345	3.80974	3.75318	4.10947	4.04084	3.89859	3.91639	4.86305	4.87382	4.45307	4.49001	5.08232	5.17164	12.7286	-0.564501
ENSMUSG00000001054	Rmnd5b	7.33225	7.40558	7.37911	7.22786	7.35929	7.29377	7.2236	7.36813	7.37871	7.2235	7.15745	7.42291	7.18287	7.26276	7.24492	7.25328	7.17319	7.28542	7.97802	7.93838	7.95892	7.92402	7.97454	8.01826	7.92729	8.06152	7.96608	7.92333	7.85286	8.07943	8.02172	7.96457	8.04651	8.05849	7.37232	7.29364	7.32348	7.26795	7.22281	7.2238	7.95844	7.97227	7.98496	7.95187	7.99314	8.0525	160.281	-0.149839
ENSMUSG00000001056	Nhp2	6.43079	6.44708	6.32044	6.21559	6.38564	6.37862	6.21016	6.23264	6.32545	6.274	6.36306	6.20001	6.41798	6.36937	6.22778	6.307	6.30287	6.39172	7.16751	7.13044	7.12636	7.1753	7.18376	7.11047	6.9879	6.94111	7.03868	7.11998	7.1205	6.92799	7.06276	7.15435	7.15234	7.19073	6.39944	6.32662	6.25608	6.27902	6.39367	6.27922	7.14144	7.15651	6.98923	7.05615	7.10856	7.17153	80.6827	-0.18212
ENSMUSG00000001062	Vps9d1	5.85258	5.76237	5.75461	5.56695	5.77564	5.7506	6.04276	6.19911	6.07267	5.95813	5.96823	5.74419	5.93688	6.04042	6.09581	5.97048	5.92858	6.07862	6.76949	6.78421	6.71786	6.79471	6.77852	6.78002	6.898	7.07087	7.03809	7.03378	7.00271	7.04579	6.82536	6.73212	6.88562	6.82923	5.78985	5.69773	6.10485	5.89018	5.98865	5.99829	6.75719	6.78442	7.00232	7.02743	6.77874	6.85743	51.7308	-0.302011
ENSMUSG00000001065	Zfp276	3.90004	3.85798	3.90595	3.85417	3.8623	3.85915	3.7654	3.72427	3.74429	3.79577	3.61907	3.73682	3.64961	3.68671	3.67577	3.64983	3.62544	3.71597	3.99859	3.99964	4.00571	3.99795	4.08982	4.01564	4.36296	4.31862	4.29782	4.30918	4.35686	4.38201	4.55569	4.53904	4.54274	4.56591	3.88799	3.85854	3.74466	3.71722	3.66816	3.65035	4.00131	4.03447	4.32646	4.34935	4.54737	4.55432	14.4998	-0.275009
ENSMUSG00000001082	Mfsd10	4.67197	4.66693	4.61354	4.61026	4.59601	4.55716	4.70751	4.9404	4.52863	4.79797	4.9602	4.75357	4.37537	4.44874	4.40608	4.41095	4.43269	4.37519	5.59831	5.40723	5.56893	5.49173	5.54267	5.42244	5.55329	5.58597	5.67526	5.66669	5.60277	5.58163	5.17797	5.20277	5.25937	5.19607	4.65082	4.58781	4.72551	4.83725	4.41206	4.41658	5.52482	5.48561	5.60484	5.61703	5.19037	5.22772	24.5138	-0.408176
ENSMUSG00000001089	Luzp1	9.06054	9.07226	9.14992	9.00572	9.14374	9.10597	8.96382	8.70288	9.09035	8.92982	8.85369	9.17701	8.99318	8.85638	8.9331	8.9342	8.85537	8.79423	9.53707	9.56077	9.39526	9.51235	9.55668	9.63902	9.8555	9.75921	9.64327	9.66677	9.70649	9.75596	9.61774	9.76146	9.49472	9.4815	9.09424	9.08514	8.91902	8.98684	8.92478	8.90756	9.4977	9.56935	9.75266	9.70974	9.6896	9.48811	544.53	-0.00109767
ENSMUSG00000001098	Kctd10	7.38256	7.46708	7.43028	7.50751	7.33598	7.40376	7.35836	7.17962	7.2124	7.22099	7.11673	7.31035	7.21913	7.19082	7.16641	7.21433	7.14309	7.15505	7.87916	7.78925	7.89466	7.89715	7.81284	7.92561	8.05323	8.06514	8.04376	7.9425	8.04343	8.15385	8.18693	8.14044	8.08587	8.22587	7.42664	7.41575	7.25013	7.21603	7.20498	7.17461	7.85436	7.87853	8.05404	8.04659	8.16369	8.15587	172.866	-0.0392491
ENSMUSG00000001100	Poldip2	7.07935	7.10476	7.02303	6.69735	7.13701	7.07265	7.10434	7.3407	7.01075	7.13133	7.11634	6.99117	6.88648	6.96172	6.946	6.96815	6.98603	6.95235	7.83036	7.84411	7.81591	7.68149	7.8482	7.69424	7.79175	7.81463	7.87538	7.84571	7.8014	7.86874	7.84342	7.87224	7.9392	7.91017	7.06905	6.969	7.15193	7.07962	6.9241	6.96672	7.83013	7.74131	7.82725	7.83862	7.85783	7.92469	127.344	-0.178391
ENSMUSG00000001103	Sebox	NA	NA	NA	NA	NA	NA	NA	NA	NA	NA	NA	NA	NA	NA	NA	NA	NA	NA	2.31601	2.32448	2.33211	2.31207	2.35475	2.31434	NA	NA	NA	NA	NA	NA	2.5696	2.5547	2.55172	2.55629	NA	NA	NA	NA	NA	NA	2.3242	2.32705	NA	NA	2.56215	2.554	NA	NA
ENSMUSG00000001105	Ift20	6.90191	7.09717	7.1689	6.90635	6.99787	7.05046	7.04888	6.9058	6.83452	7.09068	6.97121	6.85765	6.76831	6.88008	6.70654	6.83081	6.82402	6.78349	7.57944	7.58626	7.52794	7.43688	7.46468	7.48115	7.71084	7.69218	7.67027	7.67497	7.65544	7.67243	7.35808	7.35137	7.30266	7.25762	7.056	6.98489	6.92974	6.97318	6.8242	6.78712	7.56455	7.46091	7.6911	7.66761	7.35473	7.28014	129.467	-0.154496
ENSMUSG00000001119	Col6a1	5.26273	5.26237	5.26289	5.3435	5.20691	5.24361	5.09451	5.22646	5.41828	5.14487	5.35419	5.2803	4.99671	4.91338	4.99279	4.98613	5.02625	4.94207	5.71636	5.64993	5.68161	5.71131	5.74472	5.70087	6.0275	6.10893	6.00591	6.1671	6.1419	6.01323	6.19743	6.23991	6.1878	6.31153	5.26266	5.26467	5.24642	5.25979	4.95505	5.00173	5.68263	5.71897	6.04745	6.10741	6.21867	6.24967	39.552	-0.0116865
ENSMUSG00000001120	Pcbp3	7.88477	7.91199	7.7925	7.61936	7.84774	7.75589	7.6847	7.91239	7.67611	7.67776	7.73141	7.69324	7.58115	7.62404	7.63732	7.66577	7.71168	7.80925	8.55566	8.43625	8.42912	8.43488	8.5153	8.43615	8.44612	8.49274	8.54066	8.61813	8.56412	8.54643	8.53514	8.51578	8.53741	8.57592	7.86309	7.741	7.75773	7.7008	7.60259	7.67159	8.47368	8.46211	8.49317	8.57623	8.52546	8.55667	221.934	-0.209774
ENSMUSG00000001123	Lgals9	NA	NA	NA	NA	NA	NA	NA	NA	NA	NA	NA	NA	NA	NA	NA	NA	NA	NA	NA	NA	NA	NA	NA	NA	2.51197	2.4931	2.49449	2.51404	2.52629	2.49875	3.4293	3.45947	3.51862	3.5627	NA	NA	NA	NA	NA	NA	NA	NA	2.49985	2.51303	3.44438	3.54066	NA	NA
ENSMUSG00000001127	Araf	8.48313	8.48779	8.34895	8.59653	8.46372	8.47463	8.24087	8.53891	8.34438	8.31578	8.41109	8.33154	8.25577	8.24136	8.25737	8.28728	8.2438	8.28095	9.02802	9.00878	9.1114	9.15191	9.14006	9.01353	9.08602	9.21388	9.22171	9.29158	9.24363	9.12614	9.32152	9.23614	9.44253	9.49256	8.43996	8.51163	8.37472	8.3528	8.24856	8.26282	9.0494	9.10183	9.17387	9.22045	9.27883	9.46754	358.291	0.105295
ENSMUSG00000001134	Uxt	NA	NA	NA	NA	NA	NA	2.35145	2.37555	2.26725	2.40661	2.32436	2.28121	2.37651	2.39938	2.4103	2.40336	2.4051	2.40841	2.69783	2.74733	2.66747	2.7316	2.694	2.72141	3.07554	3.07669	3.07874	3.1441	3.12904	3.07508	3.05796	3.05032	3.06611	3.09551	NA	NA	2.33142	2.33739	2.38795	2.40626	2.70421	2.71567	3.07699	3.11607	3.05414	3.08081	NA	NA
ENSMUSG00000001138	Cnnm3	5.73719	5.79505	5.74551	5.77233	5.77866	5.70272	5.56573	5.68453	5.61952	5.60991	5.57079	5.63616	5.34488	5.42795	5.38423	5.32947	5.33997	5.40914	6.25677	6.31535	6.21925	6.23259	6.32896	6.22797	6.45172	6.46637	6.51216	6.46827	6.46376	6.41583	6.43688	6.47294	6.5208	6.38508	5.75925	5.75124	5.62326	5.60562	5.38641	5.35122	6.26379	6.26317	6.47675	6.44929	6.45491	6.45294	54.2656	-0.0361292
ENSMUSG00000001143	Lman2l	6.32143	6.36812	6.30909	6.4318	6.28023	6.29716	6.42489	6.35094	6.27964	6.25683	6.26871	6.36185	6.32387	6.18301	6.22245	6.23973	6.18358	6.24577	6.97557	6.97188	7.04876	7.0353	7.03835	6.83207	7.17107	7.13605	7.04266	7.15345	7.1848	6.9505	7.21318	7.23823	7.06962	7.16333	6.33288	6.3364	6.35183	6.2958	6.25344	6.21526	6.99874	6.96857	7.11659	7.09625	7.2257	7.11648	82.1089	-0.0130043
ENSMUSG00000001150	Mcm3ap	7.62363	7.61727	7.51472	7.44857	7.56215	7.47019	7.19963	7.36591	7.44537	7.24565	7.27324	7.21824	7.38904	7.43782	7.58935	7.39744	7.58869	7.44357	8.05262	8.2488	7.92688	8.19442	8.18783	8.17845	8.12277	8.13948	8.10384	8.05788	8.08293	8.22958	8.42098	8.09541	8.35036	8.30318	7.5852	7.49364	7.33697	7.24571	7.41343	7.52516	8.0761	8.1869	8.12203	8.12346	8.25819	8.32677	185.3	-0.178032
ENSMUSG00000001151	Pcnt	6.721	6.57937	6.70411	6.77604	6.71861	6.60063	6.56247	6.47342	6.25814	6.28529	6.28768	6.33027	6.76383	6.62566	6.72966	6.60369	6.53361	6.72748	7.22381	7.29558	7.20227	7.25554	7.29745	7.22324	7.27256	7.37152	7.1462	7.29755	7.20136	7.26098	7.65088	7.46832	7.59654	7.62122	6.66816	6.69843	6.43134	6.30108	6.69474	6.62232	7.24055	7.25874	7.26343	7.25329	7.5596	7.60888	104.478	0.0631402
ENSMUSG00000001156	Mxd1	5.86032	5.79302	5.68548	5.68005	5.6996	5.83975	5.53184	5.80797	5.79127	5.54167	5.68466	5.62339	5.96634	5.82697	5.95802	5.92068	5.89081	5.86766	6.5215	6.60432	6.53314	6.73106	6.53875	6.58601	6.43812	6.50292	6.46545	6.42523	6.5592	6.39197	6.69757	6.63448	6.67741	6.6695	5.77961	5.7398	5.71036	5.61657	5.89665	5.92317	6.55299	6.61861	6.46883	6.4588	6.66603	6.67345	53.2931	-0.131206
ENSMUSG00000001157	Gmcl1	6.28419	6.35325	6.39883	6.39388	6.44073	6.35191	6.20296	6.06603	6.18874	6.19546	6.2216	6.15498	6.24797	6.08696	6.01909	6.07059	6.14159	6.05934	6.90038	6.90115	6.80934	6.84368	6.87725	6.94259	6.98379	6.79412	6.84386	6.87111	6.9057	6.94165	6.75954	6.81968	6.7965	6.75765	6.34542	6.39551	6.15258	6.19068	6.16746	6.07709	6.87029	6.88784	6.87392	6.90615	6.78961	6.77708	83.2882	0.142099
ENSMUSG00000001158	Snrnp27	7.12147	7.10596	7.20368	6.9524	7.10433	7.17251	6.89383	7.00659	6.88661	6.95296	6.87494	6.88695	6.71265	6.81126	6.84353	6.85751	6.90253	6.90605	7.63555	7.76308	7.65779	7.69707	7.61921	7.63169	7.63827	7.70525	7.61528	7.53627	7.6389	7.61129	7.69089	7.65483	7.68552	7.64739	7.1437	7.07641	6.92901	6.90495	6.76196	6.86786	7.68547	7.64932	7.65293	7.59549	7.67286	7.66646	136.852	-0.117279
ENSMUSG00000001166	Oas1c	NA	NA	NA	NA	NA	NA	NA	NA	NA	NA	NA	NA	NA	NA	NA	NA	NA	NA	2.39001	2.41486	2.374	2.38702	2.40763	2.38569	2.19051	2.23307	2.22546	2.2093	2.20625	2.18984	2.3344	2.31608	2.32866	2.33874	NA	NA	NA	NA	NA	NA	2.39296	2.39345	2.21635	2.2018	2.32524	2.3337	NA	NA
ENSMUSG00000001173	Ocrl	7.92958	8.16173	8.05146	8.4243	8.12116	7.98419	7.93071	7.6797	7.79311	7.85994	7.73676	7.93218	7.86647	7.97051	7.9499	7.91297	8.00216	7.90451	8.42463	8.50865	8.43961	8.45453	8.57857	8.70373	8.79071	8.74515	8.76281	8.58445	8.62526	8.85086	8.73304	8.66719	8.57195	8.5691	8.04759	8.17655	7.80117	7.84296	7.91849	7.95501	8.45763	8.57894	8.76623	8.68686	8.70012	8.57052	284.723	0.229885
ENSMUSG00000001175	Calm1	13.8911	13.9786	14.2475	14.029	13.9704	14.1709	14.0383	13.6048	13.7866	13.9705	13.8573	13.7715	13.9729	13.9065	13.9176	13.9912	13.8433	13.8233	14.5556	14.4617	14.5474	14.4775	14.4074	14.5681	14.7652	14.8417	14.655	14.4534	14.5908	14.6412	14.6353	14.7539	14.6683	14.3806	14.0391	14.0568	13.8099	13.8664	13.9397	13.9174	14.5215	14.4843	14.754	14.5618	14.6946	14.5245	17046.7	0.0147559
ENSMUSG00000001211	Agpat3	7.54508	7.61144	7.57301	7.38925	7.57114	7.58832	7.68285	7.83503	7.60464	7.68609	7.70317	7.66397	7.46746	7.45507	7.44841	7.53346	7.42571	7.51587	8.40708	8.32222	8.362	8.23323	8.43303	8.34783	8.3119	8.37612	8.33172	8.33419	8.38237	8.37511	8.3785	8.41798	8.47333	8.50236	7.57651	7.51624	7.70751	7.68441	7.46126	7.46919	8.36377	8.33803	8.33991	8.36389	8.39824	8.48784	185.493	-0.0919248
ENSMUSG00000001227	Sema6b	8.05308	7.96387	7.84897	7.54552	7.9054	7.75278	7.78965	7.97386	7.75802	7.7599	7.83839	7.63116	7.51497	7.53954	7.58114	7.54874	7.63595	7.51538	8.26709	8.40506	8.49508	8.41475	8.51605	8.33503	8.50363	8.40218	8.62953	8.63365	8.53788	8.47689	8.40819	8.37138	8.49287	8.55032	7.95531	7.73457	7.84051	7.74315	7.52726	7.58861	8.38907	8.42195	8.51178	8.54947	8.38979	8.52159	229.416	-0.386917
ENSMUSG00000001229	Dpp9	8.39166	8.36891	8.29019	8.32646	8.37479	8.18243	8.19491	8.42318	8.25419	8.2124	8.08071	8.22616	8.03417	8.22525	8.11342	8.14601	8.23498	8.30825	8.94547	9.03144	8.96325	8.92	9.01612	8.87575	8.9072	8.91681	8.9543	8.9435	8.9239	8.94792	8.90467	8.85175	8.82146	8.8384	8.35025	8.29456	8.29076	8.17309	8.12971	8.1648	8.98006	8.93729	8.9261	8.93844	8.87821	8.82993	320.945	-0.100208
ENSMUSG00000001240	Ramp2	3.66284	3.66181	3.68232	3.62242	3.61472	3.67025	3.94239	3.90673	3.81152	3.93019	3.92665	3.85163	3.87509	3.93347	3.91982	3.96293	3.89236	3.96149	4.92549	4.89242	4.90613	4.91185	4.93186	4.90949	4.96748	5.08889	5.13337	5.05318	5.06277	5.09836	4.95393	5.00667	4.97757	5.06852	3.66899	3.6358	3.88688	3.90282	3.90428	3.92504	4.90801	4.91773	5.06325	5.07144	4.9803	5.02304	12.2616	-0.346712
ENSMUSG00000001247	Lsr	NA	NA	NA	NA	NA	NA	NA	NA	NA	NA	NA	NA	NA	NA	NA	NA	NA	NA	NA	NA	NA	NA	NA	NA	1.79631	1.82758	1.80947	1.8579	1.83769	1.80159	NA	NA	NA	NA	NA	NA	NA	NA	NA	NA	NA	NA	1.81112	1.83239	NA	NA	NA	NA
ENSMUSG00000001248	Gramd1a	7.63935	7.71756	7.62174	7.88161	7.6515	7.57052	7.3972	7.64644	7.44352	7.48575	7.42986	7.55515	7.39567	7.44155	7.50309	7.49744	7.43393	7.56659	8.15094	8.24209	8.24821	8.35631	8.30338	8.22116	8.33589	8.33344	8.27431	8.36072	8.28057	8.34435	8.39008	8.22038	8.46898	8.41462	7.65955	7.70121	7.49572	7.49025	7.41861	7.47816	8.21375	8.29362	8.31455	8.32855	8.30523	8.4418	208.915	0.0640833
ENSMUSG00000001260	Gabrg1	6.38664	6.41847	6.41221	6.88935	6.35851	6.5955	6.10909	5.73002	6.06575	5.95578	6.40641	6.30538	6.0067	6.07315	5.91369	6.00644	6.00034	5.91094	6.71812	6.67677	6.41972	6.59445	6.37682	6.67547	7.14908	6.93605	7.09714	6.96646	6.99142	6.94847	6.90689	6.96471	6.8763	6.86706	6.40578	6.61445	5.96829	6.22253	6.03992	5.97349	6.60487	6.54891	7.06076	6.96878	6.9358	6.87168	98.6668	0.584686
ENSMUSG00000001270	Ckb	11.0806	10.913	10.8864	10.6451	10.7818	10.8536	10.7894	11.3055	10.915	10.7476	10.9693	10.8588	10.7418	10.8239	10.9068	10.9044	10.9005	11.0078	11.7228	11.6998	11.7882	11.8148	11.7171	11.5345	11.4684	11.8679	11.7014	11.7737	11.7835	11.6238	11.8131	11.706	12.1108	12.0542	10.96	10.7602	11.0033	10.8586	10.7829	10.9039	11.7369	11.6888	11.6792	11.727	11.7596	12.0825	1870.08	-0.2811
ENSMUSG00000001280	Sp1	4.6856	4.58522	4.70292	4.58231	4.71787	4.69802	4.6287	4.62922	4.64107	4.6806	4.61828	4.66823	4.47017	4.47958	4.50238	4.50561	4.55759	4.47442	5.29143	5.33359	5.34017	5.2996	5.28231	5.2831	5.57325	5.62165	5.63866	5.59072	5.5448	5.61467	5.51241	5.53169	5.49752	5.41458	4.65791	4.66606	4.633	4.6557	4.47487	4.52186	5.32173	5.28834	5.61119	5.58339	5.52205	5.45605	24.5399	0.0733873
ENSMUSG00000001285	Myg1	6.24279	6.22384	6.21935	6.1874	6.10621	6.28262	6.19462	6.45916	6.358	6.13544	6.27039	6.17689	5.92321	6.0356	5.98269	6.00413	5.92788	5.98187	6.92633	6.85515	6.93969	6.96352	7.01162	6.92955	6.9302	7.0533	7.01101	7.00146	6.97127	7.07269	6.98757	6.95449	7.02578	6.95127	6.22866	6.19208	6.33726	6.19424	5.9794	5.97157	6.90706	6.96823	6.99817	7.01514	6.97103	6.98853	73.9452	-0.0986063
ENSMUSG00000001288	Rarg	2.92213	2.88425	2.92318	2.85505	2.93209	2.89245	2.56303	2.46802	2.52886	2.51602	2.54426	2.53904	2.81456	2.77604	2.76363	2.83612	2.74622	2.80579	3.14362	3.13625	3.15729	3.15371	3.1736	3.11645	3.60964	3.56735	3.59716	3.58993	3.61323	3.55979	3.49475	3.5337	3.50142	3.53774	2.90985	2.8932	2.51997	2.5331	2.7953	2.78199	3.14572	3.14792	3.59138	3.58765	3.51423	3.51958	6.94918	-0.263644
ENSMUSG00000001289	Pfdn5	7.34457	7.33145	7.30574	6.9739	7.33769	7.37775	7.29258	7.51031	7.39313	7.33085	7.44547	7.23287	7.20968	7.21815	7.2043	7.19171	7.29617	7.46856	8.03999	8.05366	8.14486	8.09095	8.0475	8.03034	8.08428	8.05837	8.05528	8.16522	8.21424	8.1136	8.10009	8.06197	8.17385	8.19209	7.32725	7.22978	7.39867	7.3364	7.21391	7.23073	8.0795	8.05626	8.06598	8.16436	8.08103	8.18297	153.115	-0.156612
ENSMUSG00000001300	Efnb2	7.89144	7.81056	7.95525	7.64898	7.85163	7.83428	7.69043	7.57789	7.72451	7.71989	7.74885	7.6845	7.46727	7.58276	7.55202	7.52582	7.62153	7.59972	8.3978	8.35754	8.2814	8.30266	8.37362	8.37078	8.55834	8.43621	8.5644	8.55206	8.44715	8.44715	8.45947	8.49328	8.54498	8.40545	7.88575	7.7783	7.66427	7.71775	7.52501	7.56646	8.34558	8.34902	8.51965	8.48212	8.47637	8.47521	226.875	-0.175797
ENSMUSG00000001305	Rrp15	3.8815	3.87508	3.8008	3.88019	3.80843	3.86363	3.65265	3.66656	3.69652	3.73369	3.83252	3.72484	3.92309	3.88665	3.89263	3.87725	3.91603	3.80686	4.46096	4.57224	4.53456	4.5291	4.51197	4.52302	4.62201	4.63748	4.62797	4.55463	4.64281	4.62123	4.68502	4.71347	4.63087	4.67379	3.85246	3.85075	3.67191	3.76368	3.90487	3.8953	4.52259	4.52137	4.62915	4.60622	4.69925	4.65233	14.7419	-0.0368181
ENSMUSG00000001313	Rnd2	3.03927	3.05386	3.06177	2.98477	3.02388	3.04986	2.85892	2.99824	2.85179	2.93411	2.97295	2.91521	2.7278	2.70097	2.72818	2.68168	2.74545	2.8058	3.62918	3.63013	3.62424	3.58364	3.6253	3.65058	3.88653	3.91219	3.93343	3.96145	3.98717	3.87094	4.19029	4.14813	4.2206	4.19674	3.05163	3.0195	2.90298	2.94076	2.71439	2.71844	3.62785	3.61984	3.91072	3.93985	4.16921	4.20867	7.60558	-0.49308
ENSMUSG00000001323	Srr	9.01406	9.1452	9.21201	9.29445	9.1277	9.09233	8.92552	8.69217	8.80006	8.94435	8.84797	8.66245	8.91126	8.97815	8.90309	8.92939	8.83548	8.83907	9.60365	9.47399	9.45828	9.41286	9.55823	9.60728	9.74956	9.81984	9.83258	9.61381	9.53282	9.75971	9.65756	9.66454	9.69902	9.44634	9.12376	9.17149	8.80592	8.81826	8.94471	8.88932	9.51197	9.52612	9.80066	9.63544	9.66105	9.57268	571.394	0.0647321
ENSMUSG00000001333	Sync	2.02735	2.01707	1.95595	1.97393	2.01144	2.0075	NA	NA	NA	NA	NA	NA	NA	NA	NA	NA	NA	NA	2.54394	2.48824	2.54566	2.49249	2.48072	2.51101	2.43028	2.41205	2.44193	2.38	2.39491	2.41831	2.73676	2.71638	2.71282	2.72905	2.00012	1.99762	NA	NA	NA	NA	2.52595	2.49474	2.42809	2.39774	2.72657	2.72094	3.60095	-0.0877618
ENSMUSG00000001334	Fndc5	5.84893	5.85023	5.82625	5.76743	5.82231	5.94149	5.92115	6.05415	5.76114	5.77662	5.90553	5.88318	5.53975	5.68771	5.72542	5.82431	5.66967	5.76128	6.64941	6.55234	6.49919	6.40778	6.50586	6.50998	6.41035	6.36456	6.32056	6.50527	6.46716	6.39006	6.427	6.39252	6.44113	6.43602	5.8418	5.84374	5.91215	5.85511	5.61373	5.7398	6.56698	6.47454	6.36516	6.45416	6.40976	6.43857	56.5208	0.0336849
ENSMUSG00000001366	Fbxo9	7.21234	7.23372	7.19638	7.61322	7.25429	7.12587	6.66664	6.65383	6.68694	6.66257	6.64358	6.44289	7.04951	6.95099	6.91348	7.06834	6.98327	7.01955	7.46743	7.55563	7.51851	7.72382	7.6413	7.59425	7.55914	7.55964	7.48871	7.44415	7.52003	7.48226	7.38623	7.47438	7.64098	7.45887	7.21415	7.33112	6.66914	6.58301	7.00025	6.98836	7.51386	7.65312	7.53583	7.48215	7.4303	7.54992	161.674	0.261298
ENSMUSG00000001376	Vps50	9.67635	9.63745	9.70795	9.97363	9.67533	9.80473	9.40449	9.01597	9.50116	9.4537	9.26634	9.4657	9.64822	9.60754	9.57939	9.53801	9.55593	9.50562	10.025	10.2473	10.1189	10.1692	10.1795	10.2702	10.3599	10.2998	10.2779	10.1814	10.2271	10.3341	10.2456	10.1769	10.1258	10.0956	9.67392	9.8179	9.30721	9.39525	9.62788	9.55777	10.1304	10.2063	10.3125	10.2475	10.2113	10.1107	866.937	0.21483
ENSMUSG00000001380	Hars	8.57502	8.51348	8.5865	8.58647	8.51482	8.5856	8.37881	8.4898	8.38752	8.30728	8.32045	8.36093	8.42932	8.33982	8.33951	8.4075	8.41894	8.34063	9.08888	9.06529	9.17306	9.11648	9.09542	9.16953	9.0893	9.13926	9.12641	9.01447	9.12504	9.14484	9.25454	9.20736	9.3326	9.31689	8.55834	8.5623	8.41871	8.32955	8.38457	8.38865	9.10907	9.12714	9.11832	9.09478	9.23095	9.32475	378.114	0.00415956
ENSMUSG00000001383	Zmat2	9.6667	9.69002	9.79484	9.18132	9.65084	9.73503	9.62815	9.68262	9.62387	9.69279	9.6343	9.46626	9.7411	9.51603	9.49536	9.61539	9.46161	9.59642	10.3258	10.2716	10.335	10.2964	10.1834	10.2669	10.3234	10.3166	10.3141	10.3643	10.4371	10.3143	10.4278	10.3267	10.3814	10.4162	9.71719	9.52239	9.64488	9.59778	9.62856	9.52412	10.3108	10.2489	10.318	10.3719	10.3773	10.3988	794.972	-0.249769
ENSMUSG00000001415	Smg5	7.32534	7.37414	7.36394	7.15775	7.51747	7.25205	7.21356	7.29905	7.15359	7.26789	7.17517	7.22135	7.46392	7.55981	7.48587	7.32983	7.57856	7.53426	8.09415	8.17816	8.13331	8.28533	8.21118	8.11252	8.05551	8.17028	8.17031	8.18139	8.16145	8.08983	8.11409	8.11562	8.13651	8.15941	7.35448	7.30909	7.22206	7.22147	7.51186	7.46475	8.1352	8.20301	8.13203	8.14422	8.11485	8.14796	160.189	-0.0537719
ENSMUSG00000001416	Cct3	9.40534	9.41635	9.4263	9.4316	9.39731	9.38425	9.26851	9.04328	9.21575	9.25792	9.16332	9.19328	9.16038	9.35926	9.21732	9.24645	9.28234	9.14733	9.91597	9.8462	9.83813	9.89555	9.96108	9.96	10.1166	10.2865	10.0946	9.99511	10.0405	10.1626	10.1642	10.0256	10.2908	10.0473	9.41599	9.40439	9.17585	9.20484	9.25982	9.2487	9.86677	9.93887	10.1659	10.0661	10.0949	10.1691	680.778	-0.0212662
ENSMUSG00000001418	Glmp	6.15646	6.28519	6.0845	6.19499	6.10704	6.08853	6.00923	6.21101	6.04036	6.07839	6.15365	6.22279	5.76272	5.84338	5.93025	5.83449	5.86414	5.91785	6.63969	6.57321	6.7546	6.63341	6.60754	6.43436	6.91481	6.91585	7.05572	7.0131	7.03631	6.91821	6.97592	6.92425	7.03072	7.08758	6.17538	6.13019	6.08686	6.15161	5.80305	5.87629	6.65583	6.55844	6.96212	6.98921	6.95009	7.05915	71.8589	-0.166124
ENSMUSG00000001419	Mef2d	9.71624	9.6093	9.53008	9.16831	9.53332	9.47452	9.31203	9.56515	9.64158	9.38944	9.46397	9.5395	9.52712	9.34199	9.56684	9.38797	9.44472	9.54506	10.1335	10.1056	10.0927	10.1533	10.1334	10.1179	10.2272	10.2486	10.2085	10.2926	10.3238	10.2172	10.346	10.334	10.391	10.497	9.61854	9.39205	9.50625	9.4643	9.43456	9.46651	10.1106	10.1349	10.2281	10.2779	10.34	10.444	731.635	-0.32134
ENSMUSG00000001424	Snd1	9.09692	8.97339	9.01168	9.15617	8.99193	9.00728	8.83378	9.03251	8.87563	8.89241	8.82317	8.71297	8.60944	8.82533	8.78469	8.8962	8.77835	8.82298	9.41689	9.49548	9.47513	9.5152	9.45497	9.45563	9.50466	9.66725	9.59865	9.54875	9.45328	9.51475	9.66363	9.64387	9.76527	9.73017	9.02733	9.05179	8.91397	8.80951	8.71739	8.81975	9.4625	9.47527	9.59019	9.50559	9.65375	9.74772	528.839	0.0270658
ENSMUSG00000001435	Col18a1	NA	NA	NA	NA	NA	NA	NA	NA	NA	NA	NA	NA	NA	NA	NA	NA	NA	NA	NA	NA	NA	NA	NA	NA	NA	NA	NA	NA	NA	NA	2.21488	2.23672	2.23778	2.21402	NA	NA	NA	NA	NA	NA	NA	NA	NA	NA	2.2258	2.2259	NA	NA
ENSMUSG00000001436	Slc19a1	4.85079	4.93147	5.02615	4.96204	4.90037	4.9761	4.56811	4.73483	4.64302	4.65904	4.72844	4.43264	4.67273	4.68012	4.75651	4.69435	4.6533	4.71352	5.32131	5.38267	5.378	5.25344	5.37062	5.33536	5.41238	5.47588	5.40676	5.4674	5.50587	5.56431	5.64971	5.65051	5.66433	5.69503	4.93614	4.94617	4.64865	4.6067	4.67643	4.70138	5.36066	5.31981	5.43167	5.51253	5.65011	5.67968	31.3223	0.0452854
ENSMUSG00000001440	Kpnb1	9.81006	9.7813	9.76025	9.7847	9.79681	9.84455	9.74121	9.59883	9.71846	9.72607	9.64717	9.64851	9.60387	9.69447	9.63476	9.63731	9.65739	9.57252	10.3676	10.3959	10.3873	10.3872	10.4388	10.4018	10.4532	10.4628	10.4559	10.4068	10.4382	10.4339	10.4007	10.4597	10.4198	10.3406	9.78387	9.80868	9.68617	9.67391	9.64917	9.64316	10.3836	10.4093	10.4573	10.4263	10.4302	10.3802	889.206	0.0397796
ENSMUSG00000001441	Npepps	9.85704	9.98232	9.94225	10.2516	10.0266	9.84234	9.78637	9.33427	9.74021	9.7372	9.47549	9.6188	9.91314	9.95224	9.74193	9.75984	9.82125	9.62981	10.2999	10.4432	10.3885	10.4986	10.4559	10.5363	10.6825	10.7079	10.5775	10.4724	10.5201	10.7324	10.6531	10.5956	10.6145	10.5442	9.9272	10.0402	9.62028	9.6105	9.93269	9.77434	10.3772	10.4969	10.656	10.575	10.6243	10.5793	1024.81	0.17345
ENSMUSG00000001445	Mrpl10	6.64987	6.74788	6.48744	6.68526	6.7291	6.53569	6.50527	6.64794	6.47077	6.43797	6.60503	6.26423	6.35492	6.46925	6.45244	6.43857	6.51723	6.40124	7.28578	7.33755	7.40414	7.45572	7.37237	7.35053	7.38049	7.4518	7.38885	7.62267	7.45249	7.39281	7.54398	7.4637	7.59172	7.57477	6.6284	6.65002	6.54133	6.43574	6.41208	6.46941	7.34249	7.39287	7.40705	7.48933	7.50384	7.58324	100.673	0.038766
ENSMUSG00000001467	Cyp51	8.09659	8.22921	8.27372	8.24381	8.34455	8.38521	8.25726	7.74223	8.27652	8.23261	8.3353	8.55168	8.35853	8.24905	8.32716	8.09131	8.28006	8.30905	8.86265	8.80756	8.85489	8.8069	8.80345	8.99	9.23511	9.09752	9.13581	9.06949	9.25248	9.30913	8.94219	9.13227	8.87126	8.64901	8.19984	8.32452	8.092	8.3732	8.30379	8.23284	8.8417	8.86678	9.15615	9.21037	9.03723	8.76014	308.187	0.231259
ENSMUSG00000001472	Tcf25	10.6679	10.7129	10.7001	10.6539	10.6791	10.6894	10.5273	10.7228	10.5137	10.5372	10.6237	10.4993	10.5448	10.4455	10.568	10.465	10.5311	10.5887	11.2498	11.301	11.3426	11.1751	11.231	11.2563	11.3201	11.2743	11.4067	11.2651	11.2536	11.3415	11.1982	11.245	11.1675	11.1611	10.6936	10.6741	10.5879	10.5534	10.4951	10.5214	11.2978	11.2208	11.3337	11.2867	11.2216	11.1643	1644.92	-0.0265181
ENSMUSG00000001482	Def8	6.80473	6.67069	6.64234	6.76795	6.70699	6.68914	6.45781	6.81713	6.55929	6.42731	6.57704	6.60179	6.50545	6.55574	6.64823	6.59723	6.553	6.70525	7.42013	7.32435	7.31165	7.36816	7.34485	7.34982	7.3773	7.46607	7.43846	7.52695	7.44642	7.43427	7.46428	7.42468	7.45188	7.50836	6.70592	6.72136	6.61141	6.53538	6.53059	6.59949	7.35204	7.35427	7.42728	7.46922	7.44448	7.48012	105.803	0.0199813
ENSMUSG00000001506	Col1a1	2.96208	2.97572	2.95128	2.89652	2.95538	2.92435	3.38959	3.31598	3.60098	3.46228	3.50857	3.40708	2.41876	2.40125	2.43724	2.4575	2.44284	2.41262	3.95343	3.99927	3.90119	3.90555	3.9285	3.88344	4.2097	4.29579	4.21572	4.25371	4.34335	4.33471	4.02584	3.99078	4.07405	4.05464	2.96303	2.92542	3.43552	3.45931	2.41001	2.44586	3.95129	3.90583	4.2404	4.31059	4.00831	4.06435	7.10614	-0.629157
ENSMUSG00000001507	Itga3	6.46346	6.39243	6.38822	6.23431	6.41018	6.43681	6.27153	6.60493	6.25723	6.16628	6.28609	6.22323	6.01741	6.07743	6.18068	6.12932	6.23642	6.12899	7.11795	7.16279	7.16664	7.14294	7.22852	7.13391	7.01379	7.06118	7.17208	7.29044	7.08393	7.18927	7.13711	7.16021	7.22733	7.35858	6.4147	6.36043	6.3779	6.2252	6.04742	6.18214	7.14913	7.16846	7.08235	7.18788	7.14866	7.29295	82.0905	-0.118363
ENSMUSG00000001518	Itfg2	5.31301	5.17532	5.27673	5.11071	5.25104	5.26919	5.26667	5.44706	5.26685	5.22973	5.20817	5.36798	5.08857	5.08589	5.08109	4.9865	5.05587	5.02575	5.98846	6.0099	6.06198	6.04112	6.06576	6.03954	6.01735	5.99072	6.15126	6.10606	6.11232	6.00284	6.26274	6.21655	6.25179	6.34124	5.25502	5.21031	5.32686	5.26863	5.08723	5.04115	6.02011	6.04881	6.05311	6.07374	6.23965	6.29652	36.3653	-0.178461
ENSMUSG00000001520	Nrip2	NA	NA	NA	NA	NA	NA	NA	NA	NA	NA	NA	NA	NA	NA	NA	NA	NA	NA	NA	NA	NA	NA	NA	NA	1.99478	2.02801	2.02002	1.98696	2.00226	2.01412	NA	NA	NA	NA	NA	NA	NA	NA	NA	NA	NA	NA	2.01427	2.00111	NA	NA	NA	NA
ENSMUSG00000001521	Tulp3	3.3698	3.40379	3.32869	3.35836	3.36313	3.42656	3.46954	3.49904	3.56527	3.53826	3.48582	3.5815	3.56394	3.5163	3.49962	3.51093	3.50841	3.57919	4.29359	4.251	4.19692	4.25504	4.23986	4.20713	4.49842	4.44577	4.47584	4.51242	4.53404	4.53487	4.48339	4.50302	4.51982	4.45136	3.36743	3.38268	3.51128	3.53519	3.54012	3.50632	4.24717	4.23401	4.47335	4.52711	4.4932	4.48559	10.0842	0.198807
ENSMUSG00000001524	Gtf2h4	5.65164	5.93257	5.91205	5.6853	5.8636	5.69838	5.80729	5.96798	5.83923	5.62799	5.79385	5.85677	5.74883	5.70207	5.71077	5.70666	5.76721	5.79811	6.48261	6.48705	6.56233	6.48102	6.55805	6.44316	6.58223	6.49788	6.52268	6.62652	6.71125	6.66917	6.61796	6.57915	6.55337	6.65719	5.83209	5.74909	5.8715	5.75954	5.72545	5.72821	6.51066	6.49408	6.53427	6.66898	6.59856	6.60528	54.9908	-0.2968
ENSMUSG00000001525	Tubb5	11.7492	11.7625	11.7965	11.7167	11.7034	11.8497	11.7376	11.7794	11.7207	11.7527	11.7262	11.7619	11.3998	11.5269	11.6454	11.5915	11.6502	11.6833	12.4171	12.2998	12.4009	12.3023	12.3068	12.2739	12.3345	12.4109	12.4419	12.3103	12.3556	12.3675	12.2513	12.3631	12.3701	12.165	11.7694	11.7566	11.7459	11.7469	11.4634	11.6291	12.3726	12.2943	12.3958	12.3445	12.3072	12.2676	3478.55	-0.01368
ENSMUSG00000001542	Ell2	6.39735	6.32597	6.41706	6.16283	6.48922	6.40675	6.69763	6.46208	6.5976	6.64307	6.3804	6.48934	6.68342	6.77107	6.68391	6.7592	6.75106	6.71374	7.17834	7.22295	7.19698	7.24822	7.2981	7.32924	7.30197	7.25566	7.23399	7.26923	7.2317	7.28528	7.17238	7.10094	7.09103	7.0354	6.38013	6.35293	6.58577	6.50427	6.72725	6.73139	7.19942	7.29185	7.26387	7.26207	7.13666	7.06321	80.7114	-0.0303659
ENSMUSG00000001552	Jup	8.00502	7.86849	7.8902	7.48697	7.80251	7.95221	7.9186	7.95024	7.90362	7.86617	7.81924	8.07563	7.86996	7.89008	7.87197	7.82611	7.99909	7.98919	8.74021	8.63773	8.60129	8.69826	8.68185	8.52747	8.65082	8.83075	8.73602	8.76293	8.848	8.77692	8.95142	8.86565	9.03239	9.0584	7.92123	7.74723	7.92415	7.92035	7.88002	7.89906	8.65974	8.63586	8.7392	8.79595	8.90853	9.0454	227.277	-0.283162
ENSMUSG00000001555	Fkbp10	NA	NA	NA	NA	NA	NA	NA	NA	NA	NA	NA	NA	NA	NA	NA	NA	NA	NA	NA	NA	NA	NA	NA	NA	2.43675	2.4431	2.45396	2.48937	2.47636	2.42836	2.61692	2.62743	2.6168	2.63871	NA	NA	NA	NA	NA	NA	NA	NA	2.4446	2.4647	2.62218	2.62775	NA	NA
ENSMUSG00000001569	Nom1	7.3702	7.25901	7.33451	7.66206	7.28009	7.32171	7.07932	7.12007	7.06935	6.96377	7.15128	6.95564	7.07676	7.1335	7.15088	7.09638	7.02653	7.20705	7.83264	7.7563	7.7914	7.71398	7.78617	7.82453	7.75569	7.82591	7.8476	7.76004	7.728	7.74174	7.8508	7.87522	7.66757	7.69258	7.32124	7.42129	7.08958	7.02356	7.10513	7.09126	7.79345	7.77489	7.80973	7.74326	7.86301	7.68008	171.409	0.203593
ENSMUSG00000001576	Ergic1	8.77666	8.85527	8.82858	8.6137	8.78075	8.78424	8.72755	8.8879	8.71667	8.77918	8.87459	8.45259	8.56463	8.71504	8.65425	8.66256	8.72828	8.63124	9.52597	9.39558	9.45869	9.44061	9.52654	9.50521	9.61946	9.58801	9.59541	9.70612	9.64858	9.58161	9.46613	9.59977	9.41162	9.45191	8.82017	8.72623	8.77737	8.70212	8.63983	8.6817	9.46008	9.49079	9.60096	9.64544	9.53295	9.43177	436.769	-0.134633
ENSMUSG00000001627	Ifrd1	6.07872	6.09153	6.19977	6.28384	6.2081	6.22371	5.90559	5.8409	6.14838	5.96092	5.88884	6.10144	5.77156	5.7835	5.71523	5.78823	5.68763	5.60654	6.30269	6.35224	6.34846	6.48675	6.41604	6.49748	6.94371	6.76325	6.80334	6.86363	6.7865	6.76379	6.6059	6.63298	6.62572	6.56254	6.12334	6.23855	5.96495	5.98373	5.77753	5.73036	6.33446	6.46675	6.83677	6.80464	6.61944	6.59413	74.3293	0.334477
ENSMUSG00000001630	Stk38l	4.77644	4.69554	4.76081	4.60035	4.8077	4.74792	4.30388	4.23124	4.35978	4.3496	4.29347	4.20456	4.96236	4.87774	4.88305	4.85632	4.76675	4.83809	5.47925	5.54771	5.4803	5.64322	5.53372	5.58573	5.59745	5.59492	5.49828	5.58459	5.69285	5.66338	5.65837	5.62491	5.64251	5.72929	4.74426	4.71866	4.2983	4.28255	4.92005	4.83537	5.50242	5.58756	5.56355	5.64694	5.64164	5.6859	25.1525	-0.120013
ENSMUSG00000001632	Brpf1	6.55321	6.64845	6.60386	6.55246	6.50783	6.51331	6.39519	6.4486	6.55591	6.43995	6.45057	6.61556	6.43651	6.49241	6.66409	6.46835	6.61102	6.64974	7.14885	7.15897	7.14927	7.19027	7.25509	7.21488	7.15913	7.0751	7.24545	7.2895	7.32401	7.23863	7.19388	7.20282	7.15042	7.1992	6.60184	6.52454	6.46657	6.50203	6.46446	6.58115	7.15236	7.22008	7.15989	7.28405	7.19835	7.17481	94.6645	-0.212677
ENSMUSG00000001642	Akr1b3	3.56408	3.57788	3.55823	3.54158	3.51507	3.49831	3.51373	3.69787	3.52152	3.50637	3.52844	3.45492	3.22161	3.25846	3.23089	3.20827	3.23945	3.22335	4.17924	4.17297	4.18096	4.20746	4.1726	4.16919	4.22444	4.24018	4.19393	4.22235	4.24838	4.26054	4.07579	4.07397	4.15887	4.1	3.56673	3.51832	3.57771	3.49658	3.24004	3.2262	4.17772	4.18308	4.21952	4.24375	4.07488	4.12944	11.6955	-0.588509
ENSMUSG00000001663	Gstt1	4.62077	4.55394	4.49946	4.4008	4.5637	4.57978	5.00495	5.17229	4.90592	4.97266	4.91459	5.11652	4.5234	4.42171	4.55786	4.43024	4.48802	4.46993	5.29821	5.30739	5.28381	5.3644	5.38066	5.29148	5.662	5.73134	5.60776	5.78857	5.66273	5.67967	5.59379	5.52307	5.55924	5.55578	4.55806	4.51476	5.02772	5.00126	4.47255	4.49204	5.29647	5.34551	5.66704	5.71032	5.55843	5.55751	21.5855	-0.269589
ENSMUSG00000001666	Ddt	4.92611	4.8723	4.88176	4.91673	4.8067	4.93542	4.80949	4.86051	4.7515	4.74975	4.95876	4.71455	4.68152	4.61449	4.60532	4.70463	4.67927	4.67373	5.61095	5.67679	5.71037	5.64083	5.60065	5.60536	5.685	5.8468	5.81452	5.8777	5.75211	5.81457	5.76886	5.73929	5.9192	5.83666	4.89339	4.88628	4.80717	4.80768	4.648	4.66307	5.66604	5.61561	5.7821	5.81479	5.75408	5.87793	30.0735	-0.0402639
ENSMUSG00000001674	Ddx18	4.21084	4.20282	4.22265	4.27821	4.28553	4.1842	4.14094	4.14683	4.2475	4.14182	4.1107	4.22769	4.34987	4.25696	4.40331	4.32929	4.37766	4.28837	4.98512	4.96632	5.03611	4.97205	4.93899	4.9872	5.0966	5.09535	4.99644	5.03171	5.08136	5.09756	5.1252	5.16253	5.02606	5.13721	4.2121	4.24931	4.17842	4.16007	4.30341	4.37009	4.99585	4.96608	5.0628	5.07021	5.14386	5.08163	19.4675	0.2765
ENSMUSG00000001687	Ubl3	8.58125	8.68615	8.51938	8.48092	8.65596	8.65944	8.41648	8.648	8.40594	8.43548	8.54477	8.43497	8.42614	8.53946	8.37901	8.55279	8.47708	8.36945	9.30175	9.23002	9.18283	9.34669	9.35111	9.20749	9.34172	9.49522	9.2741	9.48661	9.49533	9.42485	9.31098	9.36346	9.33844	9.22029	8.5956	8.59877	8.49014	8.47174	8.4828	8.46963	9.2382	9.30176	9.37035	9.46893	9.33722	9.27937	386.693	0.0194932
ENSMUSG00000001700	Gramd3	NA	NA	NA	NA	NA	NA	NA	NA	NA	NA	NA	NA	NA	NA	NA	NA	NA	NA	2.16852	2.1608	2.13968	2.13901	2.17848	2.16306	3.14104	3.17143	3.11968	3.13566	3.15415	3.11612	3.33917	3.35582	3.36643	3.35416	NA	NA	NA	NA	NA	NA	2.15633	2.16019	3.14405	3.13531	3.3475	3.3603	NA	NA
ENSMUSG00000001707	Eef1e1	6.61291	6.48475	6.56476	6.67049	6.62672	6.49865	6.00871	6.09862	6.24376	6.12992	6.25135	6.13625	6.27433	6.35154	6.17263	6.22769	6.22684	6.21876	7.07603	7.07733	7.0596	7.03616	7.18179	7.01636	7.23293	7.34549	7.16537	7.18588	7.19946	7.22811	7.36607	7.42193	7.3884	7.26094	6.55414	6.59862	6.11703	6.17251	6.31293	6.20905	7.07099	7.07811	7.24793	7.20449	7.394	7.32467	97.0446	0.103471
ENSMUSG00000001729	Akt1	7.12482	7.03757	6.92516	7.04657	7.03935	6.91952	6.82368	7.20012	6.84772	6.93106	6.99551	7.06404	7.02739	6.9196	6.87536	6.95961	6.96063	6.96409	7.83721	7.84776	7.62591	7.75947	7.91374	7.73395	7.59294	7.74651	7.58789	7.86811	7.74314	7.78313	7.95157	7.86014	7.9264	7.93504	7.02918	7.00181	6.95717	6.99687	6.9735	6.93186	7.77029	7.80238	7.64244	7.79812	7.90586	7.93072	130.089	-0.079622
ENSMUSG00000001741	Il16	NA	NA	NA	NA	NA	NA	NA	NA	NA	NA	NA	NA	NA	NA	NA	NA	NA	NA	NA	NA	NA	NA	NA	NA	NA	NA	NA	NA	NA	NA	2.69858	2.71528	2.72001	2.72629	NA	NA	NA	NA	NA	NA	NA	NA	NA	NA	2.70693	2.72315	NA	NA
ENSMUSG00000001750	Tcirg1	NA	NA	NA	NA	NA	NA	1.56968	1.67524	1.51591	1.49884	1.55352	1.6654	NA	NA	NA	NA	NA	NA	NA	NA	NA	NA	NA	NA	2.48333	2.48382	2.44784	2.47707	2.46489	2.45151	2.85623	2.85105	2.91247	2.88926	NA	NA	1.58695	1.57259	NA	NA	NA	NA	2.47167	2.46449	2.85364	2.90087	NA	NA
ENSMUSG00000001751	Naglu	4.15152	4.10678	4.14185	4.06717	4.1239	4.16211	4.01493	3.98472	3.75903	3.84495	3.92572	3.8932	3.84271	3.88868	3.86466	3.87484	3.87683	3.89534	4.72708	4.67287	4.70815	4.62565	4.67638	4.63076	4.75374	4.69584	4.7338	4.76871	4.71914	4.71106	4.91521	4.88129	5.0086	4.99944	4.13338	4.11773	3.91956	3.88796	3.86569	3.87211	4.7027	4.64426	4.72779	4.73297	4.89825	5.00402	16.7716	-0.101586
ENSMUSG00000001755	Coasy	5.5996	5.73188	5.71358	5.74539	5.66869	5.73591	5.57016	5.49168	5.49292	5.43269	5.42002	5.36312	5.72746	5.77261	5.70441	5.80245	5.79026	5.82114	6.35709	6.25628	6.22243	6.36054	6.32605	6.38444	6.62382	6.67779	6.47751	6.60194	6.5189	6.60976	6.53553	6.49821	6.56381	6.48836	5.68169	5.71666	5.51825	5.40527	5.75004	5.7657	6.2786	6.35701	6.59304	6.57687	6.51687	6.52608	52.7199	0.116384
ENSMUSG00000001763	Tspan33	6.09897	6.14167	6.09497	6.08082	6.10173	6.05701	5.97325	6.18116	6.18076	6.01823	6.17169	5.90068	5.76525	5.84324	5.80461	5.74707	5.78922	5.78068	6.46993	6.50089	6.64263	6.46625	6.54532	6.41626	6.84451	6.68727	6.75743	6.84428	6.79529	6.6659	6.74558	6.7528	6.67949	6.66447	6.11187	6.07985	6.11173	6.0302	5.80424	5.7803	6.53782	6.47594	6.76307	6.76849	6.74919	6.67198	68.2282	-0.101354
ENSMUSG00000001767	Crnkl1	7.39958	7.33185	7.38301	7.36521	7.37048	7.58299	7.32233	7.12167	7.36859	7.31488	7.18059	7.40467	7.3187	7.16965	7.19413	7.20737	7.2812	7.11506	7.84662	7.95285	7.8685	7.80052	7.91893	7.91693	7.88448	7.84346	7.78589	7.73139	7.90099	8.03521	7.93689	7.86256	7.8305	7.86855	7.37148	7.43956	7.27086	7.30005	7.24418	7.22757	7.88932	7.87879	7.83794	7.8892	7.89972	7.84953	169.731	0.164383
ENSMUSG00000001768	Rin2	4.84362	4.87177	4.77579	4.97173	4.76296	4.91711	4.74163	4.72901	4.87131	4.83609	4.82276	4.86691	5.11487	5.12679	5.15073	5.05845	5.25081	5.25395	5.61376	5.62949	5.66234	5.63536	5.68747	5.73066	5.75783	5.8575	5.81658	5.84706	5.96973	5.96761	5.97363	6.01266	6.12476	6.07742	4.8304	4.88393	4.78065	4.84192	5.12083	5.15333	5.6352	5.6845	5.81064	5.92813	5.99315	6.10109	30.5622	0.279415
ENSMUSG00000001773	Folh1	2.04725	2.04433	2.0142	1.99367	2.00474	2.01049	3.02906	2.85129	2.98813	2.90538	2.92533	3.18997	NA	NA	NA	NA	NA	NA	2.8966	2.94478	2.88908	2.87938	2.85402	2.87691	3.66065	3.64928	3.70591	3.72835	3.67305	3.70818	4.00219	3.98426	4.00601	4.0038	2.03526	2.00297	2.95616	3.00689	NA	NA	2.91015	2.8701	3.67195	3.70319	3.99323	4.0049	3.71652	-1.05004
ENSMUSG00000001774	Chordc1	8.27816	8.43268	8.5467	8.39835	8.47062	8.46191	8.45965	7.80276	8.40382	8.41249	8.11809	8.74036	8.30943	8.30194	8.28577	8.2719	8.34009	8.18441	8.90858	8.84441	8.88165	8.81474	8.73112	8.82707	9.30335	9.20368	9.14015	8.89951	9.11043	9.25064	9.10503	9.44712	8.89293	8.82753	8.41918	8.44362	8.22207	8.42365	8.30568	8.29925	8.87821	8.79098	9.21573	9.08686	9.27607	8.86023	346.229	0.0431346
ENSMUSG00000001783	Rtcb	8.64508	8.66866	8.69927	8.80587	8.64639	8.58301	8.611	8.4624	8.54769	8.57518	8.42884	8.52351	8.48829	8.47478	8.45076	8.48178	8.49831	8.46285	9.19014	9.13729	9.12049	9.16969	9.25656	9.22521	9.28287	9.44294	9.43607	9.28208	9.2504	9.30102	9.37272	9.26662	9.42484	9.4862	8.671	8.67842	8.54036	8.50918	8.48154	8.47695	9.14931	9.21715	9.38729	9.27783	9.31967	9.45552	411.415	-2.95776e-05
ENSMUSG00000001785	Pwp1	6.52678	6.53254	6.50475	6.97456	6.48253	6.56285	6.08043	5.99695	6.1262	6.11515	6.1588	6.02735	6.05095	6.1022	6.11507	6.13946	6.20896	6.24407	6.87071	6.78298	6.78547	6.74265	6.83159	6.68415	6.83623	6.91156	7.01862	6.81639	6.83522	6.8491	7.0003	6.98846	7.0601	7.09259	6.52136	6.67331	6.06786	6.10043	6.07657	6.1545	6.81306	6.7528	6.92214	6.83357	6.99438	7.07635	104.032	0.419969
ENSMUSG00000001786	Fbxo7	6.60119	6.6144	6.57982	6.49854	6.56272	6.61414	6.4771	6.45707	6.30734	6.42569	6.55228	6.28136	6.41476	6.42736	6.55251	6.4495	6.50883	6.52751	7.21576	7.22591	7.33748	7.30112	7.31732	7.26447	7.22673	7.29768	7.30912	7.28979	7.28795	7.16394	7.35352	7.39647	7.38192	7.36613	6.59847	6.55847	6.41384	6.41978	6.42106	6.50361	7.25972	7.2943	7.27784	7.24723	7.375	7.37402	94.6264	-0.0876439
ENSMUSG00000001794	Capns1	8.38351	8.31018	8.25192	8.25403	8.31963	8.37507	8.15542	8.51625	8.15802	8.18134	8.31277	8.11136	8.30304	8.09913	8.05904	8.16707	8.18516	8.34456	9.03746	9.03747	9.15365	9.15081	9.02479	8.90072	9.05991	9.03503	9.14435	9.21481	9.2277	9.0553	9.11316	9.11467	9.31572	9.33823	8.3152	8.31624	8.27656	8.20182	8.20108	8.13709	9.07619	9.02544	9.07976	9.16594	9.11392	9.32698	318.138	0.00976372
ENSMUSG00000001802	Lrp3	6.46481	6.29346	6.32296	6.25482	6.22557	6.36581	6.30867	6.55143	6.26998	6.27374	6.30265	6.42134	6.25226	6.08932	6.17214	6.12659	6.11595	6.37258	6.86325	6.97064	6.91685	6.9975	6.92349	6.85585	7.01571	6.94949	6.94778	7.05091	6.98965	7.04543	6.94594	6.95049	7.00158	7.16207	6.36041	6.28207	6.37669	6.33258	6.17079	6.13823	6.91691	6.92562	6.97099	7.02866	6.94822	7.08182	79.543	-0.219533
ENSMUSG00000001829	Clpb	7.65175	7.6403	7.69169	7.68213	7.53252	7.62357	7.4159	7.5836	7.33732	7.4301	7.40215	7.33274	7.31135	7.3728	7.39965	7.36279	7.45007	7.54299	8.26121	8.29058	8.18381	8.28924	8.13361	8.17262	8.25989	8.35404	8.30014	8.24437	8.30139	8.3041	8.40475	8.33146	8.35311	8.35909	7.66125	7.61274	7.4456	7.38833	7.34208	7.40417	8.2452	8.19849	8.30469	8.28329	8.3681	8.3561	200.074	-0.105752
ENSMUSG00000001833	2007-09-01	11.7421	11.798	12.0165	12.0321	11.8468	11.9219	11.8285	11.063	11.6407	11.758	11.5319	11.6939	11.9651	11.8051	11.6124	11.7999	11.6765	11.5303	12.3782	12.3334	12.2638	12.3778	12.2879	12.5168	12.5745	12.5257	12.4069	12.2185	12.3195	12.5594	12.4975	12.5232	12.3102	12.2211	11.8522	11.9336	11.5108	11.6613	11.8851	11.6963	12.3251	12.3942	12.5024	12.3658	12.5104	12.2657	3823.84	0.107234
ENSMUSG00000001844	Zdhhc4	4.10081	4.06103	3.98978	4.0642	4.02428	4.05151	3.56946	3.61478	3.49557	3.48398	3.60557	3.53815	3.78165	3.70459	3.71525	3.72755	3.71576	3.74436	4.39376	4.36527	4.37545	4.44883	4.36295	4.39538	4.64129	4.56507	4.67388	4.60611	4.62736	4.53291	4.58712	4.56933	4.61679	4.5923	4.05054	4.04666	3.55994	3.54256	3.74312	3.71952	4.37816	4.40239	4.62675	4.5888	4.57822	4.60454	16.6784	-0.0536422
ENSMUSG00000001847	Rac1	9.89286	10.0106	9.80316	10.3953	9.97237	9.83205	9.66758	9.59486	9.67391	9.66385	9.66111	9.53017	9.39904	9.52357	9.52947	9.54693	9.46034	9.61285	10.3415	10.229	10.2207	10.3928	10.359	10.2861	10.5464	10.5681	10.6608	10.5816	10.4827	10.5186	10.4891	10.4952	10.5736	10.5265	9.90221	10.0666	9.64545	9.61838	9.4613	9.51225	10.2637	10.346	10.5918	10.5276	10.4922	10.5501	1037.34	0.267679
ENSMUSG00000001855	Nup214	7.62539	7.44745	7.32102	7.69218	7.57574	7.39229	7.14412	7.089	7.26606	7.08069	7.10085	6.85511	7.23063	7.40592	7.42523	7.28894	7.35454	7.31478	7.98606	8.16988	7.92351	8.14605	8.15568	8.15746	8.08427	8.18897	7.97242	8.06971	8.01852	8.1126	8.08533	7.85252	8.13394	8.08304	7.46462	7.5534	7.1664	7.01222	7.31827	7.35623	8.02648	8.15306	8.08189	8.06694	7.96893	8.10849	186.185	0.159248
ENSMUSG00000001870	Ltbp1	3.18894	3.14732	3.16367	3.08938	3.11621	3.15859	3.59389	3.62642	3.52219	3.5013	3.47448	3.65093	3.42569	3.40983	3.40151	3.47323	3.45112	3.51015	4.21299	4.29669	4.24086	4.27139	4.26223	4.26638	4.53067	4.6047	4.54781	4.54451	4.60088	4.4944	4.14976	4.1185	4.1724	4.18841	3.16664	3.1214	3.58083	3.54224	3.41776	3.44195	4.25018	4.26667	4.56106	4.5466	4.13413	4.1804	8.20572	-0.668366
ENSMUSG00000001891	Ugp2	8.13326	8.18124	8.2554	8.47819	8.24911	8.19802	8.09828	7.62696	7.84874	8.14741	7.86866	8.19056	8.03563	8.0996	7.8861	8.02998	7.85929	7.83398	8.68594	8.58171	8.52437	8.6063	8.58591	8.69847	9.08199	9.1231	8.89992	8.76716	8.778	8.98423	8.61249	8.6676	8.53077	8.35362	8.18997	8.30844	7.85799	8.06887	8.06762	7.92512	8.59734	8.63023	9.035	8.84313	8.64004	8.4422	309.408	0.196584
ENSMUSG00000001901	Kcnh6	3.6334	3.60928	3.57618	3.68467	3.60949	3.59945	3.40251	3.6093	3.47116	3.47912	3.47959	3.43725	3.31207	3.32883	3.34926	3.36557	3.38887	3.3959	4.41403	4.35019	4.38958	4.31996	4.3712	4.34682	4.31287	4.31259	4.31742	4.34871	4.3718	4.32325	4.36964	4.29954	4.3776	4.39067	3.60629	3.6312	3.49432	3.46532	3.32045	3.3679	4.3846	4.34599	4.31429	4.34792	4.33459	4.38413	13.1157	0.240039
ENSMUSG00000001909	Trmt1	6.38709	6.43117	6.38281	6.46502	6.31798	6.29101	6.2373	6.40893	6.26717	6.21586	6.09896	6.22503	6.29716	6.12078	6.21799	6.23759	6.19945	6.34227	6.87734	6.91989	6.88429	6.90107	6.90205	6.91433	6.99867	6.9534	7.08015	7.05308	7.05425	7.02555	7.13043	7.12547	7.18077	7.10727	6.40035	6.358	6.30447	6.17995	6.20897	6.21834	6.89384	6.90582	7.01074	7.04429	7.12795	7.14402	84.6201	-0.142532
ENSMUSG00000001910	Nacc1	7.52307	7.42198	7.529	7.63046	7.4913	7.37327	6.9846	7.1306	7.33498	7.04594	7.07234	7.06447	7.16899	7.41477	7.3682	7.37545	7.28787	7.43394	7.98941	8.17256	7.99165	8.32682	8.23127	8.04589	8.06161	8.10709	8.07339	8.14056	8.06114	8.03766	8.22582	8.04092	8.21899	8.32975	7.49135	7.49834	7.15006	7.06092	7.29188	7.34384	8.05121	8.20133	8.0807	8.07979	8.13337	8.27437	183.033	-0.000745463
ENSMUSG00000001911	Nfix	9.74124	9.57741	9.72352	9.7495	9.6702	9.63875	9.4824	9.63918	9.44463	9.45452	9.38017	9.53305	9.48769	9.37593	9.65033	9.56808	9.46711	9.58488	10.1522	10.2314	10.3268	10.237	10.2964	10.2405	10.2184	10.1756	10.2487	10.294	10.1866	10.1691	10.2063	10.2091	10.0818	10.156	9.68073	9.68615	9.52207	9.45591	9.43181	9.56184	10.2368	10.258	10.2142	10.2166	10.2077	10.1189	824.679	0.000768412
ENSMUSG00000001924	Uba1	11.4996	11.4748	11.4085	11.5377	11.4557	11.3621	11.2463	11.1366	11.2093	11.2551	11.0928	11.0959	11.1542	11.3513	11.2347	11.2545	11.3017	11.2055	11.8164	11.9356	11.9034	11.9693	12.0293	12.0045	12.034	12.2204	12.0587	11.9508	11.9399	12.1259	12.0654	11.9074	12.2013	12.1132	11.461	11.4518	11.1974	11.1479	11.2528	11.2636	11.8851	12.001	12.1044	12.0055	11.9864	12.1572	2815.05	-0.0147358
ENSMUSG00000001930	Vwf	1.99681	1.93936	1.92114	1.9256	1.96412	1.95191	2.0953	2.2533	2.23198	2.17197	2.13604	2.1196	NA	NA	NA	NA	NA	NA	2.10508	2.12162	2.09647	2.07448	2.11657	2.09623	3.32641	3.33241	3.32638	3.31328	3.28298	3.33517	2.94475	2.93086	2.94719	2.95419	1.95243	1.94721	2.19353	2.14254	NA	NA	2.10772	2.09576	3.3284	3.31048	2.9378	2.95069	3.51997	-0.172525
ENSMUSG00000001942	Siae	6.68805	6.63288	6.72649	6.78784	6.79257	6.82324	6.55586	6.67523	6.55894	6.58306	6.53996	6.43896	6.36522	6.31506	6.31956	6.36216	6.22483	6.2295	7.46517	7.25363	7.37621	7.33269	7.40424	7.29729	7.33643	7.26569	7.31182	7.32854	7.32876	7.22372	7.09631	7.08098	7.13377	6.94624	6.68247	6.80122	6.59668	6.52066	6.34014	6.30219	7.365	7.34474	7.30465	7.29367	7.08864	7.04001	107.994	0.297935
ENSMUSG00000001943	Vsig2	2.18259	2.16409	2.23074	2.27098	2.17255	2.16901	NA	NA	NA	NA	NA	NA	NA	NA	NA	NA	NA	NA	3.28514	3.26247	3.29646	3.22828	3.29715	3.25124	2.89304	2.90432	2.89757	2.89568	2.90658	2.82416	3.09776	3.12887	3.16491	3.14252	2.19247	2.20418	NA	NA	NA	NA	3.28136	3.25889	2.89831	2.87547	3.11332	3.15371	5.67781	0.302177
ENSMUSG00000001946	Esam	4.15895	4.19264	4.13395	4.15387	4.17782	4.2007	4.12294	4.02135	3.9603	4.1052	4.0354	4.05783	3.71884	3.73664	3.7531	3.72983	3.75549	3.753	4.51106	4.6156	4.58905	4.61158	4.56164	4.57749	5.0315	5.01778	5.09931	5.06057	4.99676	5.00667	4.80318	4.75963	4.78914	4.76052	4.16185	4.17747	4.03486	4.06614	3.72774	3.74614	4.5719	4.58357	5.04953	5.02134	4.7814	4.77483	17.727	0.128579
ENSMUSG00000001948	Spa17	3.69182	3.6604	3.6707	3.7555	3.67663	3.70826	3.18602	3.05316	3.16359	3.10245	3.03444	3.12987	3.4651	3.45156	3.52311	3.48419	3.44386	3.46018	4.37225	4.30772	4.29739	4.3099	4.3367	4.33868	4.27501	4.29861	4.33666	4.29584	4.29193	4.28357	4.39152	4.36383	4.38522	4.39181	3.6743	3.71347	3.13426	3.08892	3.45833	3.48372	4.32579	4.32843	4.30343	4.29045	4.37767	4.38851	13.7542	0.381791
ENSMUSG00000001962	Fam50a	6.89069	6.7284	6.79287	6.97232	6.82181	6.98246	6.75873	6.62101	6.50437	6.74956	6.67514	6.41877	6.43509	6.39838	6.36315	6.46217	6.42024	6.39705	7.37714	7.2648	7.27247	7.19164	7.2509	7.3131	7.36668	7.35833	7.38135	7.27893	7.27686	7.409	7.51027	7.48505	7.52792	7.60595	6.80399	6.92553	6.62804	6.61449	6.41673	6.41519	7.3048	7.25188	7.36878	7.3216	7.49766	7.56693	118.588	0.281371
ENSMUSG00000001964	Emd	7.44334	7.39858	7.34552	7.35649	7.41639	7.38915	7.44491	7.36388	7.2376	7.38715	7.35016	7.19628	7.14154	7.31639	7.18279	7.22602	7.31461	7.12831	8.02549	7.83213	7.95109	7.94416	7.96724	7.93556	8.22709	8.22023	8.25828	8.17298	8.14385	8.24566	8.10645	8.10595	8.19891	8.02175	7.39581	7.38734	7.3488	7.3112	7.22897	7.24114	7.93624	7.94899	8.2352	8.1875	8.1062	8.11033	167.479	-0.014201
ENSMUSG00000001983	Taco1	6.59985	6.57625	6.58951	6.7194	6.52868	6.4846	6.37127	6.12719	6.20244	6.24278	6.12993	6.00196	6.30551	6.3621	6.22052	6.37376	6.35394	6.27447	6.91246	7.07966	6.98039	6.98709	6.99518	6.96719	7.26064	7.22077	7.25514	7.09646	7.19007	7.17094	7.33593	7.15803	7.22238	7.15367	6.58854	6.57756	6.23364	6.12489	6.33381	6.31608	6.99084	6.98316	7.24552	7.15249	7.24698	7.18803	98.1031	-0.0505782
ENSMUSG00000001985	Grik3	7.79307	7.64332	7.6954	7.87128	7.64158	7.74315	7.36766	7.65284	7.53854	7.38595	7.42236	7.36848	7.2039	7.2624	7.31085	7.32388	7.33826	7.16772	8.32607	8.19068	8.3167	8.3445	8.25909	8.25068	8.36015	8.26574	8.3481	8.41508	8.47389	8.3867	8.51122	8.60243	8.35736	8.41794	7.7106	7.752	7.51968	7.39226	7.23315	7.32433	8.27782	8.28476	8.32466	8.42522	8.55683	8.38765	215.158	0.0636188
ENSMUSG00000001986	Gria3	11.0898	11.0387	11.0587	11.1945	11.0863	11.0688	10.9144	10.6388	10.8636	10.8797	10.7887	10.7027	11.0163	10.9267	10.8282	10.9135	10.8388	10.704	11.5294	11.6557	11.4991	11.6139	11.6196	11.6457	11.8316	11.6635	11.653	11.6987	11.6073	11.7413	11.6583	11.7152	11.5657	11.5855	11.0624	11.1165	10.8056	10.7904	10.9715	10.8602	11.5614	11.6264	11.716	11.6824	11.6867	11.5756	2182.73	0.0741201
ENSMUSG00000001995	Sipa1l2	6.95655	6.85535	6.87636	6.67566	6.93134	6.78475	6.71424	6.84848	6.80584	6.63479	6.61972	7.04772	6.84514	6.70816	6.77141	6.82156	6.74528	6.74247	7.29701	7.42934	7.39491	7.38804	7.4773	7.4919	7.57351	7.37328	7.47959	7.59132	7.48129	7.46093	7.59127	7.49138	7.45067	7.61098	6.89609	6.79725	6.78952	6.76741	6.77665	6.77942	7.37376	7.45241	7.47546	7.51118	7.54132	7.53083	113.677	-0.206298
ENSMUSG00000001998	Ap4e1	4.93109	4.94655	4.96284	5.01393	5.04677	4.95733	4.47822	4.27801	4.51522	4.58589	4.47564	4.45293	4.80504	4.85518	4.80832	4.78059	4.72086	4.74241	5.25112	5.32833	5.24574	5.39355	5.29645	5.41704	5.49904	5.59167	5.46148	5.40751	5.47667	5.53289	5.42765	5.39106	5.34362	5.3945	4.94682	5.00601	4.42382	4.50482	4.83011	4.76992	5.27506	5.36901	5.5174	5.47236	5.40936	5.36906	32.0485	0.301105
ENSMUSG00000001999	Blvra	6.60625	6.65572	6.7573	6.61246	6.72168	6.65477	6.64016	6.4561	6.42341	6.50805	6.34642	6.32453	6.44893	6.46148	6.34339	6.42374	6.31417	6.3627	7.20919	7.07396	7.12378	7.09938	7.18213	7.0963	7.34972	7.45024	7.32367	7.23841	7.27976	7.38893	7.36788	7.3758	7.24891	7.28074	6.67309	6.66297	6.50656	6.393	6.45521	6.36043	7.13564	7.12594	7.37455	7.30237	7.37184	7.26483	101.398	-0.0114693
ENSMUSG00000002006	Pdzd4	7.11098	6.90542	7.13537	7.26362	7.12542	6.88088	6.92433	6.78785	6.94064	6.74214	6.6709	6.93219	7.22879	7.04997	6.94049	7.04961	6.84822	7.03644	7.4166	7.57144	7.48479	7.64832	7.61692	7.62259	7.621	7.70575	7.55357	7.52749	7.59065	7.65384	7.71968	7.54906	7.75954	7.80837	7.05059	7.08997	6.88428	6.78174	7.13938	6.94611	7.49094	7.62928	7.62678	7.59066	7.63437	7.78395	138.84	0.0859253
ENSMUSG00000002007	Srpk3	2.56964	2.56495	2.51679	2.54189	2.55339	2.58164	2.10929	2.18113	2.12957	2.16182	2.18893	2.0979	2.62573	2.61028	2.61099	2.62659	2.68068	2.69684	2.95738	2.98968	2.99583	2.95569	2.97922	2.98969	2.75641	2.82734	2.84806	2.78412	2.79664	2.76829	2.41317	2.40695	2.44479	2.42361	2.55046	2.55897	2.14	2.14955	2.618	2.63942	2.98097	2.97487	2.81061	2.78302	2.41006	2.4342	5.63997	0.184634
ENSMUSG00000002010	Idh3g	9.57531	9.61925	9.65593	9.67865	9.52841	9.62205	9.51533	9.25792	9.33846	9.40726	9.39045	9.20161	9.27184	9.43971	9.31528	9.36438	9.46671	9.35724	10.0972	10.0683	10.1079	10.0418	10.1009	10.1115	10.2842	10.4094	10.3188	10.1091	10.1638	10.2677	10.2016	10.0985	10.1995	10.0999	9.61683	9.6097	9.37057	9.33311	9.35578	9.38212	10.0911	10.0847	10.3375	10.1802	10.1501	10.1497	785.044	-0.0159854
ENSMUSG00000002012	Pnck	7.73262	7.83485	7.63151	7.8842	7.70251	7.6356	7.55398	7.50709	7.3629	7.41664	7.5815	7.46172	7.3113	7.40572	7.38173	7.4693	7.37477	7.34461	8.14364	8.04207	8.07049	8.13056	8.07692	8.12156	8.35096	8.5454	8.66427	8.34271	8.39342	8.52165	8.69158	8.47852	8.75056	8.62102	7.73299	7.74077	7.47466	7.48662	7.35851	7.4086	8.0854	8.10968	8.52021	8.41926	8.58505	8.68579	216.161	-0.00851089
ENSMUSG00000002014	Ssr4	7.82965	7.82479	7.83521	7.88851	7.83722	7.88104	7.65334	7.57888	7.84302	7.82875	7.80135	7.65697	7.45521	7.65216	7.7572	7.65197	7.63689	7.59659	8.36354	8.30335	8.39629	8.27488	8.31816	8.29096	8.50574	8.62733	8.62427	8.59245	8.56729	8.52778	8.36468	8.58654	8.50405	8.41798	7.82988	7.86892	7.69175	7.76235	7.55368	7.68202	8.3544	8.29467	8.58578	8.56251	8.47561	8.46101	231.201	0.0702387
ENSMUSG00000002015	Bcap31	8.07152	8.18928	8.32355	8.17052	8.29967	8.19261	8.14853	8.12867	8.10204	8.24621	8.12739	8.29923	8.39189	8.14423	8.10931	8.10256	8.08903	7.90188	8.81926	8.83847	8.86147	8.72448	8.78457	8.82206	8.9847	8.9069	8.89223	8.86127	8.88826	8.93044	8.81289	8.93189	8.7372	8.71698	8.19478	8.22093	8.12641	8.22428	8.26806	8.1003	8.83973	8.77703	8.92794	8.89333	8.87239	8.72709	296.569	0.0515246
ENSMUSG00000002017	Fam98a	6.6814	6.68278	6.68413	6.89754	6.69963	6.64884	6.59868	6.28544	6.56711	6.53764	6.43689	6.28275	6.70613	6.59256	6.59889	6.6416	6.66514	6.72757	7.05746	7.1632	7.09303	7.07804	7.1518	7.14016	7.16698	7.24916	7.14538	7.04789	7.12645	7.13763	7.21308	7.39926	7.32149	7.24659	6.68277	6.74867	6.48374	6.41909	6.64934	6.63521	7.10456	7.12333	7.18717	7.10399	7.30617	7.28404	108.027	0.144507
ENSMUSG00000002028	Kmt2a	8.50697	8.31265	8.27902	8.11546	8.36722	8.1091	8.03351	7.95236	8.37889	7.94171	7.9099	8.40299	8.19753	8.15606	8.12947	8.13056	8.14523	8.16468	8.80508	8.88923	8.76729	8.8792	8.8274	8.84824	8.90705	8.77424	8.8382	8.89779	8.80433	8.84549	9.12233	9.10167	9.03244	9.07275	8.36621	8.19726	8.12159	8.08487	8.1768	8.13508	8.82053	8.85161	8.83983	8.8492	9.112	9.05259	312.317	-0.284486
ENSMUSG00000002031	Ift46	6.93395	6.92615	6.88268	6.84499	6.92554	6.94178	6.86258	6.79465	6.61262	6.78327	6.84165	6.72731	6.75069	6.70285	6.74679	6.61176	6.73327	6.70138	7.42403	7.48671	7.42454	7.36755	7.33281	7.3788	7.47879	7.56652	7.63061	7.59471	7.53823	7.56409	7.56388	7.43055	7.53799	7.56278	6.91426	6.9041	6.75662	6.78408	6.72677	6.69727	7.44509	7.35972	7.55864	7.56568	7.49722	7.55039	119.386	-0.0102632
ENSMUSG00000002032	Tmem25	7.58737	7.62798	7.4661	7.52617	7.51681	7.55992	7.31748	7.66097	7.26745	7.36661	7.47679	7.32437	7.07778	7.08595	7.20609	7.25892	7.04779	7.17863	8.13283	8.0427	8.22739	8.14949	8.2507	8.21119	8.17444	8.23603	8.32678	8.29878	8.28581	8.13247	8.07689	8.17623	8.1362	8.07384	7.56048	7.5343	7.4153	7.38925	7.08187	7.17094	8.13431	8.20379	8.24575	8.23902	8.12656	8.10502	186.897	-0.0591743
ENSMUSG00000002043	Trappc6a	3.05305	3.01977	2.99237	2.98808	2.99524	3.03852	3.35584	3.5795	3.36646	3.36548	3.47332	3.42385	2.80012	2.81813	2.84429	2.84534	2.7991	2.82468	4.16898	4.07756	4.1508	4.19026	4.16007	4.17097	4.05149	4.08864	4.05041	4.11013	4.09161	4.04395	4.37606	4.3468	4.38946	4.37653	3.02173	3.00728	3.43393	3.42088	2.80913	2.82958	4.13245	4.17377	4.06351	4.0819	4.36143	4.383	7.70833	-0.223188
ENSMUSG00000002052	Supt6	9.92081	9.72898	9.75269	9.77134	9.87403	9.6425	9.47801	9.64686	9.68416	9.47566	9.44988	9.44118	9.81439	9.78705	9.68851	9.75277	9.78805	9.66244	10.2859	10.5406	10.2075	10.5728	10.5632	10.5404	10.3919	10.5065	10.1955	10.4507	10.3023	10.4877	10.6292	10.233	10.6632	10.6787	9.80083	9.76262	9.60301	9.45557	9.80072	9.74311	10.3447	10.5588	10.3646	10.4135	10.4311	10.6709	883.533	-0.0575632
ENSMUSG00000002055	Spag5	3.66398	3.64707	3.68769	3.66127	3.62344	3.57966	3.44102	3.49959	3.53195	3.5376	3.50479	3.40923	3.79898	3.81925	3.84964	3.77275	3.77519	3.76057	4.2344	4.27323	4.2838	4.26916	4.26201	4.267	4.44277	4.40209	4.39076	4.39069	4.35711	4.4411	4.69521	4.65138	4.67935	4.69937	3.66625	3.62146	3.49086	3.48387	3.80912	3.79919	4.26381	4.26606	4.41187	4.3963	4.6733	4.68936	12.8759	-0.50999
ENSMUSG00000002058	Unc119	5.48371	5.5589	5.51466	5.39691	5.538	5.46322	5.26543	5.33944	5.43184	5.35217	5.41067	5.2392	5.32004	5.30732	5.4412	5.38239	5.48067	5.39596	5.99315	6.0608	6.13194	5.99474	6.00638	5.91876	6.03196	6.04866	6.14933	6.14646	6.06675	6.05819	6.09702	6.07954	6.12767	6.1605	5.51909	5.46604	5.34557	5.33401	5.31368	5.43475	6.06196	5.9733	6.07665	6.09047	6.08828	6.14408	43.9538	-0.189982
ENSMUSG00000002059	Rab34	2.6769	2.63919	2.66338	2.67579	2.65993	2.68939	2.80974	2.83647	2.6804	2.78277	2.8245	2.74422	2.72124	2.72896	2.75734	2.69121	2.76464	2.78063	3.39856	3.41519	3.43257	3.444	3.38783	3.40375	3.65016	3.69912	3.68499	3.71032	3.73189	3.68562	3.7055	3.7119	3.73518	3.75259	2.65983	2.67504	2.77554	2.78383	2.7251	2.73773	3.41544	3.41186	3.67809	3.70927	3.7087	3.74388	6.47248	0.299106
ENSMUSG00000002064	Sdf2	8.04333	7.99269	7.9155	7.92669	7.87132	7.97127	7.93384	7.77337	7.89917	7.85474	7.9208	7.93488	7.8317	7.72902	7.86919	7.77408	7.84007	7.84487	8.54806	8.56604	8.61083	8.54617	8.50664	8.50648	8.81072	8.61886	8.69975	8.68122	8.71158	8.62237	8.67966	8.67378	8.65219	8.7079	7.98384	7.92309	7.86879	7.90347	7.78036	7.82778	8.57498	8.51976	8.70978	8.67172	8.67672	8.68004	247.868	-0.116223
ENSMUSG00000002068	Ccne1	6.87372	7.04451	6.88154	6.88066	6.97946	6.97575	6.83099	6.66893	6.98463	6.82974	6.91115	6.72642	6.64404	6.78847	6.73974	6.6201	6.73747	6.65054	7.49275	7.52176	7.55067	7.46761	7.4138	7.49293	7.58431	7.48697	7.70543	7.47584	7.50005	7.59965	7.42156	7.53578	7.49355	7.48455	6.93325	6.94529	6.82819	6.82244	6.71626	6.6991	7.52173	7.45811	7.59223	7.52518	7.47867	7.48905	122.164	0.0326154
ENSMUSG00000002083	Bbc3	3.43742	3.45746	3.44808	3.47695	3.4305	3.44752	3.31093	3.32437	3.27818	3.37029	3.26947	3.27473	2.77552	2.80023	2.80049	2.77369	2.78562	2.84445	4.07504	4.09154	4.0472	4.14318	4.05125	4.04635	4.1553	4.12423	4.12885	4.1234	4.09824	4.0974	3.91727	3.95327	3.98061	3.95352	3.44765	3.45165	3.30449	3.30483	2.78788	2.7866	4.07126	4.08026	4.13613	4.10634	3.93527	3.96707	11.2856	0.0318795
ENSMUSG00000002100	Mybpc3	2.6705	2.72085	2.6907	2.74252	2.7005	2.73951	2.34394	2.29568	2.35368	2.40094	2.39271	2.38051	2.00401	1.97418	1.94108	1.93792	1.98975	1.98104	2.41674	2.41713	2.42434	2.41383	2.42739	2.42399	NA	NA	NA	NA	NA	NA	NA	NA	NA	NA	2.69402	2.72751	2.3311	2.39139	1.98909	1.95625	2.4194	2.42174	NA	NA	NA	NA	6.93875	0.613638
ENSMUSG00000002102	Psmc3	9.96649	9.85385	9.89131	9.83026	9.79559	9.85639	9.83421	9.91033	9.77073	9.78012	9.70116	9.58868	9.7728	9.61719	9.63137	9.76495	9.71538	9.8206	10.4722	10.4352	10.416	10.4513	10.4198	10.3898	10.2871	10.4688	10.3458	10.3332	10.3232	10.3552	10.4376	10.4499	10.6334	10.5614	9.90389	9.82741	9.83842	9.68999	9.695	9.7039	10.4411	10.4203	10.3672	10.3372	10.4438	10.5974	933.773	-0.115792
ENSMUSG00000002103	Acp2	8.34035	8.26118	8.33662	8.47987	8.35207	8.3768	8.11321	8.04694	7.9203	8.14469	8.12673	7.99121	7.93722	8.03509	7.89999	7.99943	7.98397	8.0207	8.81235	8.80262	8.79636	8.72463	8.90441	8.74692	9.04048	9.00301	9.08147	9.08887	8.97757	8.96882	8.92619	9.11304	9.0803	9.03683	8.31271	8.40291	8.02682	8.08754	7.98615	7.96113	8.80378	8.79198	9.04165	9.01175	9.01962	9.05857	330.4	0.145575
ENSMUSG00000002105	Slc39a13	3.67654	3.63504	3.66304	3.74466	3.62503	3.59761	3.46105	3.50717	3.461	3.42486	3.62257	3.60723	3.35549	3.35378	3.40164	3.35892	3.41272	3.34445	3.97059	3.99448	3.95958	3.95359	4.01883	3.9805	4.16363	4.1497	4.28811	4.20759	4.21883	4.21119	3.919	3.9006	3.92304	3.89871	3.65821	3.65577	3.47641	3.55155	3.35464	3.39109	3.97489	3.98431	4.20048	4.21254	3.9098	3.91088	13.8815	-0.0403761
ENSMUSG00000002107	Celf2	10.9954	10.9953	11.0144	11.1145	10.9706	11.0348	10.8595	10.8564	10.7797	10.8896	10.8345	10.7363	10.8671	10.8046	10.83	10.8339	10.8725	10.826	11.5979	11.4585	11.5429	11.5815	11.5055	11.5301	11.6516	11.7415	11.6893	11.6369	11.6962	11.6832	11.7126	11.7424	11.835	11.7501	11.0017	11.0399	10.8319	10.8201	10.8358	10.8455	11.5331	11.5391	11.6941	11.6721	11.7275	11.7926	2080.95	0.0523021
ENSMUSG00000002109	Ddb2	4.21663	4.15005	4.12608	4.05298	4.22021	4.19075	3.5034	3.47461	3.3944	3.50343	3.42173	3.45248	3.72642	3.75227	3.79327	3.77675	3.7969	3.74281	4.57606	4.46106	4.45194	4.52058	4.51559	4.55017	4.79991	4.85234	4.93555	4.89289	4.8966	4.87917	4.69272	4.78717	4.80865	4.76894	4.16425	4.15464	3.45747	3.45921	3.73935	3.78897	4.49635	4.52878	4.8626	4.88955	4.73995	4.7888	16.5709	-0.0580132
ENSMUSG00000002111	Spi1	NA	NA	NA	NA	NA	NA	NA	NA	NA	NA	NA	NA	NA	NA	NA	NA	NA	NA	NA	NA	NA	NA	NA	NA	NA	NA	NA	NA	NA	NA	2.70543	2.71804	2.76019	2.77906	NA	NA	NA	NA	NA	NA	NA	NA	NA	NA	2.71173	2.76962	NA	NA
ENSMUSG00000002129	Sf3a1	8.26795	8.28029	8.1852	8.26185	8.27757	8.20682	8.01525	7.99619	8.00197	7.99269	8.07568	8.20582	7.98443	8.04042	8.03292	8.04217	8.01497	8.10588	8.73635	8.75161	8.71518	8.63631	8.76624	8.74303	8.95471	8.99967	8.93161	8.95279	9.03145	8.9462	8.98678	9.05495	9.03116	8.94132	8.24448	8.24875	8.00447	8.0914	8.01243	8.03002	8.73438	8.71519	8.962	8.97681	9.02087	8.98624	304.01	0.00180672
ENSMUSG00000002147	Stat6	5.44423	5.34925	5.40423	5.51601	5.47526	5.341	5.30125	5.34485	5.47133	5.40151	5.26556	5.39274	5.21922	5.2879	5.28509	5.27422	5.27252	5.26427	5.89794	5.94982	6.01396	5.96773	5.94522	5.92756	6.23444	6.32489	6.30578	6.31533	6.2704	6.29965	6.42766	6.38824	6.45114	6.5215	5.39923	5.44409	5.37248	5.35327	5.25356	5.27728	5.95391	5.94683	6.28837	6.29512	6.40795	6.48632	44.3326	0.172681
ENSMUSG00000002190	Clgn	5.68961	5.59705	5.59311	5.64564	5.69084	5.66624	5.35808	5.26126	5.13057	5.37529	5.32211	5.37213	5.71844	5.62269	5.55855	5.55895	5.64452	5.60119	6.25093	6.21531	6.22926	6.23303	6.3643	6.24157	6.54505	6.4068	6.46903	6.32595	6.3863	6.45202	6.16588	6.0795	5.8809	5.91882	5.62659	5.66757	5.24997	5.35651	5.67056	5.58734	6.23184	6.27963	6.47363	6.38809	6.12269	5.89986	50.0959	0.153236
ENSMUSG00000002205	Vrk3	5.04513	5.00224	5.05217	4.81869	5.04386	5.04005	4.91163	4.91839	4.93794	4.85143	4.96213	4.8235	5.31455	5.37953	5.40769	5.29624	5.34451	5.27477	5.84343	5.87712	5.85748	5.8936	5.91786	5.80799	5.91781	5.88408	5.8626	5.95331	5.99337	5.9156	6.18105	6.09301	6.2665	6.19726	5.03318	4.96754	4.92265	4.87902	5.34704	5.34948	5.85934	5.87315	5.88816	5.95409	6.13703	6.23188	30.0807	-0.312004
ENSMUSG00000002210	Smg9	7.07541	6.989	7.10172	6.95611	7.10009	7.07617	6.80554	6.99625	6.81682	6.84175	6.99462	6.81208	7.02053	6.93427	7.05307	6.9636	6.99644	7.04362	7.74352	7.7875	7.82674	7.64138	7.74693	7.64851	7.6552	7.71151	7.66002	7.73023	7.67864	7.71146	7.75284	7.85978	7.87679	7.82764	7.05538	7.04412	6.87287	6.88282	6.9774	7.00437	7.78592	7.67894	7.67558	7.70677	7.80631	7.85222	131.687	-0.00253586
ENSMUSG00000002221	Paxip1	6.30359	6.31574	6.26029	6.26076	6.19648	6.36349	6.11684	6.24544	6.05717	6.10218	6.0688	5.99031	6.04383	6.11683	6.12545	6.11375	6.21937	6.27431	7.06053	6.95186	6.92343	6.94831	6.99577	6.88436	6.9725	7.07582	6.98959	7.05803	7.03014	7.05037	7.01526	7.05784	7.14622	7.1647	6.29321	6.27358	6.13982	6.05376	6.08033	6.15285	6.97861	6.94281	7.01264	7.04618	7.03655	7.15546	77.7106	-0.0481735
ENSMUSG00000002222	Rmnd5a	7.97415	7.9349	8.16907	7.92183	8.1123	7.99742	7.80055	7.43965	7.90975	7.79373	7.56342	7.73829	8.19035	8.02109	7.94658	7.96339	8.00435	7.96242	8.58178	8.63899	8.50717	8.69816	8.65633	8.64864	8.6328	8.75339	8.54095	8.60158	8.64738	8.68418	8.72223	8.72495	8.69872	8.58149	8.02604	8.01052	7.71665	7.69848	8.10572	7.97144	8.57598	8.66771	8.64238	8.64438	8.72359	8.64011	259.592	-0.0149489
ENSMUSG00000002233	Rhoc	2.61891	2.63967	2.60629	2.59523	2.67894	2.66386	3.13424	3.17836	3.11858	3.03687	3.07388	3.08773	2.96906	2.98643	2.94612	2.99643	2.98361	3.01013	3.78204	3.78309	3.76208	3.78967	3.79494	3.75573	3.57641	3.63322	3.66315	3.62104	3.6602	3.63768	3.92542	3.93162	4.01804	3.98899	2.62162	2.64601	3.14373	3.06616	2.97774	2.97539	3.77574	3.78011	3.62426	3.63964	3.92852	4.00351	5.67896	0.53063
ENSMUSG00000002250	Ppard	4.17609	4.19308	4.24855	4.29063	4.18758	4.22179	4.18066	4.15069	4.1114	3.94908	4.09589	4.13839	4.36365	4.27238	4.33729	4.27853	4.30643	4.35718	4.6651	4.73988	4.71269	4.78259	4.75045	4.69587	4.60104	4.65088	4.65683	4.71638	4.70746	4.68349	4.76492	4.82673	4.80032	4.81192	4.20591	4.23333	4.14758	4.06112	4.31801	4.30742	4.70589	4.74297	4.63625	4.70244	4.79583	4.80612	19.7007	0.191824
ENSMUSG00000002265	Peg3	10.4505	10.4727	10.4385	10.3381	10.4191	10.3776	10.3758	10.2219	10.4095	10.2898	10.2077	10.4836	10.2816	10.3429	10.3346	10.2426	10.4269	10.2533	10.8998	10.9949	10.8666	10.9665	10.9063	10.8602	11.0922	11.0691	10.9068	10.88	11.0294	11.0528	11.1346	11.163	10.8542	10.8802	10.4539	10.3783	10.3357	10.327	10.3122	10.3347	10.9204	10.911	11.0227	10.9874	11.1488	10.8672	1366.58	-0.106331
ENSMUSG00000002274	Metrn	NA	NA	NA	NA	NA	NA	NA	NA	NA	NA	NA	NA	NA	NA	NA	NA	NA	NA	NA	NA	NA	NA	NA	NA	2.20804	2.20458	2.22472	2.23527	2.24772	2.18857	2.59112	2.60017	2.59704	2.63015	NA	NA	NA	NA	NA	NA	NA	NA	2.21245	2.22385	2.59565	2.61359	NA	NA
ENSMUSG00000002279	Lmf1	5.29764	5.34919	5.40266	5.17798	5.34159	5.44249	5.47818	5.59805	5.48978	5.4974	5.46276	5.53168	5.01819	5.10042	5.06744	5.09638	5.15116	5.2112	5.94221	5.89761	5.99088	5.89105	5.97666	5.88291	6.10644	6.08678	6.11103	6.20793	6.15346	6.09722	6.01633	6.02457	5.95204	5.97327	5.34983	5.32069	5.522	5.49728	5.05931	5.10499	5.94356	5.91687	6.10142	6.15287	6.02045	5.96265	38.8169	-0.0889168
ENSMUSG00000002280	Ciao3	6.29194	6.13241	6.23206	6.16694	6.16328	6.25343	6.19734	6.23685	6.16656	5.9756	6.10563	5.94879	6.16567	6.10093	6.23003	6.21329	6.16145	6.21638	7.03047	6.93817	6.98202	6.99553	6.86496	6.87245	6.80353	6.87648	6.8508	6.98707	6.90317	6.89507	7.036	7.01647	7.03666	7.05392	6.2188	6.19455	6.20025	6.01	6.1333	6.20159	6.98355	6.91098	6.84361	6.92844	7.02623	7.04529	73.6307	-0.0661421
ENSMUSG00000002297	Dbf4	2.16144	2.17886	2.18515	2.15397	2.21448	2.20098	2.27749	2.1791	2.10796	2.21341	2.14781	2.26161	NA	NA	NA	NA	NA	NA	2.97171	2.98829	2.98889	2.97173	2.97771	2.95962	3.01274	2.99705	2.99906	3.00701	3.02627	3.03459	2.6902	2.70083	2.72096	2.68888	2.17515	2.18981	2.18818	2.20761	NA	NA	2.98296	2.96969	3.00295	3.02262	2.69552	2.70492	4.19002	0.442312
ENSMUSG00000002307	Daxx	6.06175	5.94225	5.96546	5.91554	6.07969	5.91174	5.97992	6.01464	5.9821	5.89682	5.94513	6.13445	5.85315	5.81371	5.86257	5.9073	5.80736	6.07187	6.51776	6.38242	6.49884	6.49381	6.51798	6.46724	6.67955	6.64454	6.7721	6.71923	6.70515	6.6893	6.77152	6.78125	6.73306	6.7652	5.98982	5.96899	5.99222	5.99213	5.83343	5.85908	6.46634	6.49301	6.69873	6.70456	6.77639	6.74913	62.5527	-0.0503567
ENSMUSG00000002308	Cd320	5.68365	5.72514	5.64688	5.90404	5.62177	5.59415	5.32934	5.48901	5.31807	5.42483	5.49251	5.27797	5.26434	5.30527	5.44359	5.34795	5.31956	5.33749	6.20123	6.23302	6.30246	6.13517	6.20759	6.14999	6.20475	6.23222	6.12857	6.20985	6.1906	6.19059	6.18746	6.24412	6.2687	6.23034	5.68522	5.70665	5.37881	5.39844	5.28481	5.37036	6.24557	6.16425	6.18851	6.19702	6.21579	6.24952	55.0967	0.0744849
ENSMUSG00000002319	Ipo4	6.70004	6.67038	6.82696	6.79631	6.68822	6.7162	6.63232	6.79064	6.77462	6.71239	6.77593	6.64189	6.73742	6.77909	6.78963	6.70637	6.83156	6.91568	7.46616	7.47648	7.48756	7.39343	7.4292	7.27721	7.29458	7.39532	7.4035	7.44698	7.53515	7.2958	7.53135	7.43523	7.43028	7.46786	6.73246	6.73358	6.73253	6.71007	6.75826	6.77585	7.47673	7.36661	7.36447	7.42598	7.48329	7.44907	107.705	-0.00913609
ENSMUSG00000002320	Tm9sf1	6.25482	6.31122	6.29019	6.17199	6.43691	6.23176	6.14116	6.28381	6.1828	6.08185	6.29205	5.9896	6.21051	6.12055	6.00602	6.02731	6.07248	6.19768	6.92699	6.9557	7.03493	7.00786	7.00484	6.95062	7.02037	7.06419	7.03894	7.067	7.04635	7.02643	6.98517	6.98414	7.03218	7.00798	6.28541	6.28022	6.20259	6.12117	6.16553	6.03527	6.97254	6.98777	7.04117	7.04659	6.98465	7.02008	76.9106	0.021348
ENSMUSG00000002324	Rec8	2.54717	2.55315	2.59683	2.5215	2.53931	2.59286	2.53167	2.57463	2.58797	2.49468	2.52869	2.55763	2.81392	2.80828	2.75632	2.79556	2.83684	2.81997	3.39018	3.41445	3.45105	3.37477	3.42501	3.37268	2.88334	2.86441	2.89426	2.9276	2.93759	2.91004	3.26943	3.24924	3.32116	3.28432	2.56572	2.55122	2.56476	2.527	2.8111	2.79624	3.41856	3.39082	2.88067	2.92508	3.25934	3.30274	5.51317	-0.288027
ENSMUSG00000002325	Irf9	2.14457	2.13602	2.13202	2.23137	2.12369	2.18181	1.63138	1.72355	1.62	1.69862	1.72017	1.68221	NA	NA	NA	NA	NA	NA	2.25448	2.27112	2.28481	2.27649	2.25479	2.28443	4.15205	4.16884	4.15403	4.21349	4.40764	4.39561	4.82003	4.84808	5.16544	5.16482	2.13754	2.17896	1.65831	1.70033	NA	NA	2.27014	2.27191	4.15831	4.33891	4.83406	5.16513	5.42061	1.06658
ENSMUSG00000002326	Gmpr2	6.28418	6.41303	6.49434	6.46431	6.43122	6.44089	5.89645	5.97755	5.96801	5.86964	5.92409	5.80483	5.84571	5.97569	5.9619	5.90906	5.86415	5.96309	6.64902	6.55716	6.74479	6.55179	6.5786	6.55854	6.95111	6.98769	6.88155	6.85872	6.89856	6.80367	6.9859	7.05041	6.92316	6.97055	6.39718	6.44547	5.94734	5.86619	5.9107	5.91171	6.65032	6.56298	6.94012	6.85365	7.01816	6.94686	86.7363	0.124336
ENSMUSG00000002329	Mdp1	6.296	6.22211	6.26576	6.18866	6.19698	6.23921	6.03402	6.2086	6.03994	5.9945	6.12022	6.01646	6.24812	6.17145	6.26189	6.25182	6.1243	6.20105	6.83555	6.77319	6.80556	6.78451	6.84045	6.87019	6.97956	7.03576	7.01106	6.99943	6.92273	6.88487	6.86324	6.86565	6.95056	7.00553	6.26129	6.20828	6.09419	6.04373	6.20979	6.21267	6.80477	6.83172	7.00879	6.93568	6.86444	6.97805	74.8718	-0.14963
ENSMUSG00000002332	Dhrs1	7.95325	7.83479	7.82543	7.71662	7.80516	7.83747	7.80243	7.89316	7.64365	7.71882	7.67537	7.57922	7.54525	7.59202	7.59379	7.56435	7.5183	7.62435	8.35843	8.27373	8.31861	8.30163	8.32096	8.28368	8.46307	8.50708	8.52495	8.47665	8.44924	8.54024	8.5405	8.55417	8.64023	8.57105	7.87116	7.78642	7.77975	7.6578	7.56863	7.55881	8.31692	8.30209	8.49837	8.48871	8.54733	8.60564	226.509	-0.149305
ENSMUSG00000002341	Ncan	9.81777	9.60613	9.7245	9.72846	9.64119	9.6236	9.4457	9.79646	9.57	9.44926	9.50823	9.51195	9.14351	9.23682	9.27285	9.31014	9.26203	9.39989	10.1022	10.0592	10.0905	10.0982	10.1603	10.0027	10.2701	10.1257	10.2923	10.3884	10.352	10.1595	10.1857	10.255	10.3616	10.4821	9.71613	9.66442	9.60405	9.48981	9.19017	9.28168	10.084	10.0871	10.2293	10.3	10.2204	10.4218	828.883	-0.0877646
ENSMUSG00000002342	Tmem161a	5.23043	5.07173	5.07117	5.14099	5.03035	5.04498	4.75637	4.9649	4.65962	4.78012	4.91431	4.81112	4.49644	4.60906	4.65178	4.6214	4.63695	4.71395	5.58236	5.51919	5.68448	5.57688	5.68644	5.53971	5.71253	5.66669	5.7692	5.79911	5.73519	5.70606	5.74922	5.80202	5.76936	5.75288	5.12445	5.07211	4.79363	4.83518	4.55275	4.63671	5.59535	5.60101	5.71614	5.74679	5.77562	5.76112	35.0247	-0.283027
ENSMUSG00000002343	Armc6	7.1718	7.08885	6.97506	7.15629	6.92458	7.04455	6.90939	7.02972	6.78899	6.93407	6.8905	6.72453	6.749	6.78752	6.86807	6.78464	6.83161	7.00564	7.41847	7.4404	7.53768	7.42637	7.37571	7.38767	7.54196	7.63183	7.67212	7.59244	7.60379	7.59738	7.51398	7.59996	7.64456	7.5155	7.07857	7.04181	6.90937	6.8497	6.76826	6.82811	7.46552	7.39658	7.61531	7.59787	7.55697	7.58003	135.27	-0.106278
ENSMUSG00000002345	Borcs8	5.10582	5.16174	5.07426	5.10261	5.11778	5.04838	5.18872	5.36715	5.13302	5.1616	5.17328	5.08637	4.9967	4.98857	5.0131	5.08388	5.0451	5.18209	5.57936	5.62696	5.64629	5.60771	5.67836	5.56927	5.98277	6.07507	6.04671	6.04011	5.96491	6.0332	6.03429	6.03408	6.14633	6.13861	5.11394	5.08959	5.22963	5.14042	4.99263	5.04736	5.61754	5.61845	6.03485	6.01274	6.03419	6.14247	34.3429	-0.126965
ENSMUSG00000002346	Slc25a42	5.63775	5.49332	5.49949	5.36923	5.53209	5.52178	5.45843	5.58897	5.51338	5.41323	5.47413	5.60534	5.38808	5.42107	5.49232	5.35289	5.35527	5.54001	5.98168	5.89294	6.14826	5.95081	6.04383	5.90944	6.1241	6.05083	6.111	6.11836	6.11025	6.05321	6.16546	6.11152	6.10452	6.10124	5.54352	5.47436	5.52026	5.49757	5.40457	5.40016	6.00763	5.96803	6.09531	6.09394	6.13849	6.10288	44.0505	-0.255946
ENSMUSG00000002365	Snx9	4.52828	4.56743	4.62166	4.57104	4.47595	4.54511	4.12747	4.203	4.21222	4.19487	4.1695	4.21052	4.39348	4.3105	4.35332	4.31352	4.34228	4.31234	4.73173	4.74067	4.72692	4.67358	4.72691	4.70539	5.07802	5.05314	5.06825	5.06058	5.06296	5.03555	5.5788	5.58332	5.51966	5.54533	4.57246	4.5307	4.1809	4.19163	4.35199	4.33637	4.73311	4.70196	5.06647	5.05303	5.58106	5.53249	23.933	-0.278646
ENSMUSG00000002372	Ranbp3	8.33879	8.28467	8.26619	8.29701	8.22807	8.2742	8.19141	8.3635	8.26166	8.27164	8.35413	8.14299	8.24407	8.05657	8.17102	8.17058	8.17406	8.19764	9.02432	8.94702	8.97609	9.04501	8.94481	8.84351	8.8715	8.90747	8.92952	8.9805	8.9781	8.89371	9.05587	9.02023	9.00324	9.16219	8.29655	8.26643	8.27219	8.25626	8.15032	8.17188	8.98248	8.94444	8.90283	8.95077	9.03805	9.08271	311.511	-0.059685
ENSMUSG00000002379	Ndufa11	8.21666	8.201	7.96557	8.07873	8.11301	7.95387	7.85736	8.10849	7.88859	7.93469	8.10751	8.18979	7.69674	7.74308	7.91031	7.91304	7.93843	8.07186	8.60078	8.43854	8.78161	8.61534	8.69116	8.4056	8.66519	8.79502	8.90674	8.89973	8.82145	8.74656	8.82887	8.69404	9.09025	9.03259	8.12774	8.04854	7.95148	8.07733	7.71991	7.92059	8.60698	8.5707	8.78898	8.82258	8.76145	9.06142	273.311	-0.158345
ENSMUSG00000002393	Nr2f6	4.21597	4.13127	4.09574	4.18558	4.16529	4.13558	3.74854	3.97842	3.72881	3.90604	3.85606	4.03208	3.70738	3.82701	3.71715	3.78022	3.8067	3.81537	4.55868	4.54581	4.55786	4.5449	4.5886	4.49358	4.74771	4.79469	4.80945	4.83172	4.71275	4.6873	4.69507	4.70718	4.75085	4.78793	4.14766	4.16215	3.81859	3.93139	3.76719	3.76802	4.55412	4.54236	4.78395	4.74392	4.70112	4.76939	18.1767	0.0924571
ENSMUSG00000002395	Use1	5.97348	6.06068	6.00109	6.0202	6.07631	5.98036	6.00184	6.24127	6.15227	5.93518	6.10141	5.96867	6.08088	6.05035	6.13726	6.03566	6.15943	6.20069	6.77113	6.78587	6.7739	6.84877	6.71806	6.78299	6.61426	6.59107	6.72723	6.75423	6.68103	6.73551	6.70532	6.89154	6.83355	6.89794	6.01175	6.02562	6.13179	6.00175	6.06561	6.11079	6.77697	6.78328	6.64419	6.72359	6.79843	6.86574	64.9064	0.0443288
ENSMUSG00000002396	Ocel1	3.40077	3.46585	3.48139	3.60815	3.4811	3.4802	2.7405	2.73259	2.77908	2.72515	2.86611	2.68409	3.24441	3.17387	3.17025	3.14315	3.17842	3.14951	3.90052	3.91699	3.92651	3.91789	3.87933	3.83633	3.96276	3.9547	3.98473	4.07479	4.04826	3.97801	4.18645	4.18782	4.14808	4.19277	3.44934	3.52315	2.75072	2.75845	3.20914	3.16394	3.91468	3.87785	3.9674	4.03369	4.18713	4.17043	12.9494	0.828326
ENSMUSG00000002409	Dyrk1b	5.42771	5.36132	5.38053	5.21592	5.35005	5.24263	5.41733	5.61141	5.61538	5.31693	5.4411	5.45446	5.4638	5.30649	5.38533	5.31285	5.29124	5.30838	6.16722	6.14763	6.19616	6.22534	6.25161	6.24192	5.92767	6.03579	5.99907	6.08375	6.09958	6.0082	6.20689	6.14124	6.28988	6.25595	5.38985	5.26954	5.54804	5.40417	5.38514	5.32981	6.17034	6.23962	5.98751	6.06384	6.17406	6.27292	39.1445	-0.503842
ENSMUSG00000002413	Braf	9.1036	9.06062	9.11705	9.06038	9.15373	9.13251	8.87909	8.63883	8.87859	8.89981	8.92196	8.83416	9.11313	8.99767	9.03077	8.98867	8.98123	8.89393	9.65053	9.68396	9.64356	9.70802	9.72478	9.76421	9.95526	9.84455	9.84039	9.81672	9.92561	9.85864	9.75924	9.74994	9.72376	9.6867	9.09376	9.11554	8.79884	8.88531	9.0554	9.00022	9.65935	9.73233	9.88007	9.86699	9.75459	9.70523	550.302	0.0439101
ENSMUSG00000002416	Ndufb2	6.55582	6.4421	6.5289	6.19351	6.56114	6.45319	6.58376	6.95987	6.71696	6.66692	6.86216	6.61202	6.64168	6.57663	6.5144	6.65155	6.62722	6.51378	7.68132	7.84599	7.73638	7.78307	7.76261	7.55538	7.51135	7.54347	7.36193	7.74995	7.66148	7.5189	7.65553	7.70095	7.57087	7.72041	6.50894	6.40261	6.75353	6.7137	6.60916	6.59773	7.75456	7.70035	7.47225	7.64345	7.67824	7.64564	85.6444	-0.247334
ENSMUSG00000002428	Hltf	6.81486	6.7864	6.93977	7.20504	6.86656	6.93254	6.65438	6.33519	6.60969	6.55884	6.37588	6.54438	6.60882	6.43109	6.39775	6.36097	6.46799	6.52408	7.10222	7.23166	7.14718	7.15933	7.20913	7.16276	7.35488	7.26621	7.22069	7.19932	7.23695	7.25	7.05793	7.10366	7.00945	6.91796	6.84701	7.00138	6.53309	6.49303	6.51996	6.4089	7.16035	7.17707	7.28059	7.22876	7.08079	6.96371	126.951	0.35235
ENSMUSG00000002455	Prpf6	8.4115	8.4121	8.24656	8.35694	8.27239	8.39733	8.12171	8.34133	8.3661	8.21866	8.32878	7.98459	8.18672	8.07475	8.20972	8.11094	8.22725	8.34417	8.90284	9.0098	8.95585	8.94655	8.96556	8.90132	8.73082	8.83301	8.96828	8.851	8.9362	8.8429	9.02023	8.93051	8.96151	9.15381	8.35672	8.34222	8.27638	8.17734	8.13074	8.18264	8.95616	8.93781	8.84404	8.8767	8.97537	9.05766	326.78	-0.0331028
ENSMUSG00000002458	Rgs19	5.70508	5.70048	5.6555	5.6636	5.62913	5.65934	5.68559	5.7681	5.67591	5.66155	5.7492	5.76084	5.65942	5.62039	5.61714	5.64783	5.69578	5.86706	6.41607	6.35673	6.37315	6.39993	6.36682	6.25918	6.42465	6.32914	6.48997	6.48321	6.46356	6.35102	6.41262	6.42454	6.42679	6.48879	5.68702	5.65069	5.70987	5.72386	5.63991	5.65358	6.38198	6.34197	6.41459	6.4326	6.41858	6.45779	50.8054	-0.141282
ENSMUSG00000002459	Rgs20	6.5588	6.57523	6.53734	6.36983	6.6105	6.60888	6.5136	6.30456	6.30763	6.48699	6.43457	6.46359	6.47688	6.57228	6.44724	6.58416	6.47373	6.51673	7.25753	7.20177	7.22049	7.15926	7.24839	7.1484	7.52853	7.52365	7.5266	7.3591	7.50703	7.40921	7.33305	7.38013	7.15381	7.14938	6.55712	6.52974	6.37526	6.46172	6.52458	6.50171	7.2266	7.18535	7.52626	7.42511	7.35659	7.1516	91.4678	-0.0313606
ENSMUSG00000002475	Abhd3	5.63237	5.6179	5.53795	5.49452	5.50752	5.57035	5.69795	5.5573	5.78441	5.58674	5.68579	5.78221	5.43823	5.54256	5.52299	5.54445	5.55419	5.58315	6.4932	6.36274	6.42656	6.4322	6.55817	6.44497	6.69757	6.72044	6.78449	6.82158	6.75272	6.75771	6.47543	6.64388	6.59332	6.59027	5.59607	5.52413	5.67989	5.68491	5.49039	5.54054	6.4275	6.47845	6.73417	6.77734	6.55966	6.5918	46.4037	-0.274569
ENSMUSG00000002477	Snrpd1	7.15246	7.31722	7.42594	7.1743	7.28568	7.53013	7.00911	6.50151	6.88085	7.02203	6.97243	6.74475	7.3396	7.26835	7.11464	7.24825	7.16187	7.15281	7.66891	7.61488	7.68227	7.62303	7.52308	7.76136	8.12023	8.12811	7.97475	7.70979	7.89204	8.05063	7.89387	7.94577	7.81337	7.80608	7.29854	7.33004	6.79716	6.91307	7.30397	7.17492	7.65535	7.63582	8.07437	7.88416	7.91982	7.80972	159.376	0.0945331
ENSMUSG00000002486	Tchp	3.4036	3.38919	3.45408	3.30356	3.32181	3.33225	3.51682	3.62	3.44745	3.5634	3.56934	3.52869	3.4465	3.41351	3.44292	3.47767	3.44271	3.39411	4.04807	4.07947	4.08455	4.04849	4.07123	4.04609	4.45695	4.39317	4.40656	4.40565	4.44339	4.3689	4.82871	4.8266	4.81686	4.84795	3.41562	3.31921	3.52809	3.55381	3.43001	3.45443	4.07069	4.05527	4.41889	4.40598	4.82765	4.83241	9.77945	-1.33125
ENSMUSG00000002489	Tiam1	8.72226	8.8655	8.78979	8.74128	8.69942	8.6875	8.45317	8.71166	8.72926	8.63901	8.65583	8.76608	8.3454	8.50054	8.50854	8.33994	8.54142	8.61872	9.28966	9.27867	9.12619	9.21105	9.24371	9.29855	9.33662	9.2768	9.29897	9.43712	9.36832	9.30787	9.42282	9.41806	9.49809	9.48664	8.79252	8.7094	8.63137	8.68697	8.42297	8.4633	9.2315	9.2511	9.30413	9.3711	9.42044	9.49236	431.553	-0.144859
ENSMUSG00000002496	Tsc2	9.05737	8.96301	8.83689	9.11585	8.90306	8.72261	8.64047	8.93817	8.70553	8.69082	8.58293	8.60859	8.74158	8.9585	8.9149	8.79846	8.99286	8.96787	9.54434	9.83974	9.53123	9.75115	9.78649	9.67659	9.62982	9.70194	9.56159	9.751	9.60793	9.70642	9.7824	9.51983	9.74643	9.77878	8.95242	8.91384	8.76139	8.62745	8.85004	8.90207	9.63844	9.73808	9.63112	9.68845	9.65112	9.7626	495.194	-0.0685371
ENSMUSG00000002504	Slc9a3r2	4.83243	4.70148	4.77906	4.76313	4.75992	4.75508	5.00365	5.30741	5.08517	5.05926	5.18651	5.18907	5.03664	4.9638	5.07183	5.07409	5.09778	5.07075	5.68422	5.68738	5.67215	5.62938	5.63809	5.65685	5.62019	5.71172	5.82534	5.80064	5.81292	5.76012	5.74223	5.68869	5.6916	5.69025	4.77099	4.75938	5.13207	5.14495	5.00022	5.08123	5.68125	5.64144	5.71908	5.79123	5.71546	5.69092	27.2971	-0.0732408
ENSMUSG00000002524	Puf60	9.49636	9.51057	9.48179	9.53378	9.50212	9.50209	9.40486	9.67797	9.3359	9.41119	9.51748	9.28833	9.27814	9.27811	9.31177	9.39221	9.37567	9.32422	10.2564	10.1071	10.2145	10.0862	10.0945	10.0512	10.3028	10.19	10.2857	10.2622	10.2952	10.1969	10.1961	10.2057	10.3198	10.213	9.49624	9.51266	9.47291	9.40567	9.27813	9.35988	10.1927	10.0773	10.2595	10.2514	10.2009	10.2664	726.735	0.021955
ENSMUSG00000002546	Golga2	8.21174	8.28317	8.29014	8.10813	8.20656	8.39803	8.14741	8.27666	8.24589	8.19518	8.24937	8.0282	8.17647	8.0051	8.08025	8.02644	8.12876	8.25455	8.96554	8.84747	8.95102	8.87754	8.73638	8.88499	8.88389	8.85681	9.00919	9.02933	9.03232	8.89302	9.02962	9.02828	8.92272	9.06022	8.26168	8.23757	8.22332	8.15758	8.09078	8.07849	8.92134	8.83297	8.91663	8.98489	9.02895	8.99147	303.87	-0.0137002
ENSMUSG00000002550	Uck1	4.17802	4.17069	4.04319	4.08641	4.13606	4.11481	4.12315	4.42078	4.0632	4.02887	4.15066	3.99349	4.44778	4.4077	4.44048	4.45964	4.42851	4.56463	4.9249	4.8656	4.86709	4.79203	4.91119	4.74089	4.74944	4.82379	4.78248	4.89738	4.90535	4.84256	4.80275	4.8286	4.87117	4.79706	4.13063	4.11243	4.20238	4.05767	4.42774	4.44288	4.88586	4.8147	4.78524	4.88176	4.81567	4.83412	16.8676	-0.158956
ENSMUSG00000002578	Ikzf4	3.83913	3.82618	3.80909	3.767	3.7603	3.82951	3.83243	3.86437	3.9412	3.81287	3.88828	3.93816	3.66853	3.67367	3.72784	3.66893	3.73075	3.7494	4.24797	4.24178	4.28001	4.23525	4.28327	4.24229	4.69494	4.67606	4.80024	4.73095	4.73736	4.7746	4.47221	4.46172	4.52854	4.49408	3.8248	3.7856	3.87934	3.87977	3.6711	3.70917	4.25659	4.2536	4.72374	4.74764	4.46696	4.51131	13.5145	-0.37605
ENSMUSG00000002580	Mien1	7.44725	7.49986	7.5254	7.38241	7.4499	7.41365	7.50378	7.41917	7.30826	7.41305	7.40737	7.36592	7.26958	7.36162	7.32152	7.26057	7.30681	7.42914	8.03228	8.08942	8.0333	7.92514	7.9346	7.90887	8.26958	8.24997	8.19695	8.23129	8.24698	8.27944	7.96462	8.08964	7.9574	7.93597	7.49084	7.41532	7.4104	7.39545	7.3156	7.2963	8.05167	7.92287	8.23884	8.25257	8.02713	7.94668	174.695	-0.145999
ENSMUSG00000002602	Axl	2.66292	2.6582	2.66264	2.61429	2.65573	2.66657	3.3399	3.25974	3.24705	3.072	3.20666	3.36442	NA	NA	NA	NA	NA	NA	3.74867	3.68122	3.69016	3.67655	3.65895	3.71135	4.22833	4.29007	4.28656	4.38355	4.29889	4.29229	4.80767	4.82091	4.85857	4.95823	2.66126	2.64553	3.28223	3.21436	NA	NA	3.70668	3.68228	4.26832	4.32491	4.81429	4.9084	5.80772	-0.293746
ENSMUSG00000002603	Tgfb1	NA	NA	NA	NA	NA	NA	NA	NA	NA	NA	NA	NA	NA	NA	NA	NA	NA	NA	NA	NA	NA	NA	NA	NA	2.09034	2.11483	2.07799	2.09169	2.10582	2.10117	2.52235	2.52838	2.55573	2.57851	NA	NA	NA	NA	NA	NA	NA	NA	2.09439	2.09956	2.52537	2.56712	NA	NA
ENSMUSG00000002608	Ccdc97	6.97322	6.86119	6.81174	6.84295	6.88081	6.80941	6.56579	6.79774	6.55333	6.59677	6.6451	6.30203	6.61606	6.5525	6.73852	6.61102	6.67454	6.82715	7.58011	7.44909	7.50635	7.48478	7.53215	7.42555	7.51352	7.47007	7.65301	7.67258	7.61827	7.47598	7.5597	7.6403	7.5859	7.6304	6.88205	6.84439	6.63895	6.51463	6.58428	6.67469	7.51185	7.48083	7.54553	7.58894	7.6	7.60815	116.33	-0.0967757
ENSMUSG00000002617	Zfp40	5.70417	5.863	5.89485	6.0081	5.98651	5.88944	5.73306	5.44728	5.68381	5.94714	5.66119	5.48926	6.05993	5.99268	5.88989	5.91377	5.90394	5.83941	6.20909	6.30593	6.32307	6.3938	6.37523	6.42305	6.82223	6.62017	6.5679	6.46593	6.56537	6.68243	6.2969	6.28797	6.12108	6.07142	5.82067	5.96135	5.62138	5.6992	6.0263	5.90253	6.27936	6.39736	6.6701	6.57124	6.29243	6.09625	61.4908	0.454437
ENSMUSG00000002625	Akap8l	6.83013	6.87373	6.74957	6.85141	6.71726	6.72531	6.80914	6.76005	6.88516	6.82369	6.69772	6.90448	6.43449	6.42133	6.44068	6.4496	6.41857	6.46782	7.21864	7.04898	7.24446	7.11573	7.1874	7.20797	7.36037	7.28559	7.43632	7.39554	7.30728	7.2879	7.42796	7.37373	7.31291	7.29223	6.81781	6.76466	6.81812	6.80863	6.42791	6.43628	7.17069	7.17037	7.36076	7.33024	7.40084	7.30257	111.759	-0.154833
ENSMUSG00000002633	Shh	3.37952	3.31101	3.29731	3.29964	3.27151	3.32354	3.43874	3.54256	3.4794	3.5011	3.42013	3.4264	3.04232	3.02287	3.01946	3.02548	3.07914	2.97427	4.17639	4.11759	4.15759	4.15914	4.12032	4.0912	4.40688	4.38665	4.3666	4.42808	4.37932	4.40772	4.35391	4.32298	4.35863	4.38078	3.32928	3.29823	3.4869	3.44921	3.0326	3.04136	4.15052	4.12356	4.38671	4.40504	4.33844	4.3697	9.77041	-0.423414
ENSMUSG00000002635	Pdcd2l	5.89563	5.9417	5.81942	5.80971	5.93529	5.96743	5.85473	5.81917	5.90393	5.98297	5.74049	5.81322	5.56172	5.70805	5.60777	5.66782	5.63231	5.55387	6.4378	6.43679	6.49575	6.45815	6.42984	6.47501	6.40014	6.54366	6.61751	6.46986	6.47933	6.36519	6.51117	6.50277	6.69988	6.71382	5.88558	5.90415	5.85928	5.84556	5.63489	5.63596	6.45678	6.45433	6.52044	6.43813	6.50697	6.70685	58.4327	0.0818604
ENSMUSG00000002658	Gtf2f1	7.78647	7.91668	7.86095	7.8417	7.71088	7.80801	7.78887	7.63476	7.73996	7.71054	7.65338	7.76414	7.67197	7.55899	7.5552	7.69133	7.67196	7.73188	8.35526	8.25506	8.30614	8.31943	8.10744	8.29693	8.3698	8.4018	8.48086	8.30139	8.44033	8.37345	8.34202	8.42115	8.34596	8.35493	7.8547	7.78686	7.7212	7.70936	7.61548	7.6395	8.30549	8.24127	8.41749	8.37172	8.38159	8.35044	226.947	-0.139481
ENSMUSG00000002660	Clpp	5.5343	5.70019	5.63513	5.58222	5.67492	5.72037	5.65891	5.71497	5.61919	5.6564	5.68044	5.56088	5.79837	5.66298	5.78993	5.68204	5.82592	5.96457	6.11603	6.14888	6.19984	6.20335	6.21588	6.12731	6.41796	6.45171	6.50254	6.40992	6.45319	6.37121	6.5257	6.45495	6.62257	6.53772	5.62321	5.65917	5.66436	5.63257	5.73067	5.76596	6.15492	6.18218	6.4574	6.41144	6.49033	6.58015	49.3396	0.148169
ENSMUSG00000002661	Alkbh7	5.85524	5.84156	5.72992	6.06257	5.78566	5.83576	5.58571	5.7395	5.5812	5.56383	5.69466	5.70784	5.33216	5.38295	5.30938	5.3282	5.36138	5.43024	6.15792	6.1379	6.23061	6.24596	6.26817	6.25342	6.39876	6.42622	6.46174	6.44371	6.36478	6.42726	6.19629	6.22367	6.15637	6.1956	5.8089	5.89466	5.63547	5.65545	5.35756	5.33298	6.17547	6.25585	6.4289	6.41192	6.20998	6.17599	60.9366	0.274325
ENSMUSG00000002679	Med6	6.83809	6.75179	6.70034	6.82746	6.83271	6.84083	6.61256	6.39524	6.747	6.67494	6.65762	6.6316	6.60592	6.58453	6.51641	6.57197	6.5213	6.41722	7.0986	7.09556	7.10032	7.12496	7.05855	7.13571	7.49901	7.41349	7.50868	7.44679	7.36528	7.43637	7.35193	7.32525	7.28635	7.34539	6.76341	6.83367	6.58493	6.65472	6.59522	6.53656	7.09816	7.10641	7.47373	7.41615	7.33859	7.31587	111.748	0.164685
ENSMUSG00000002688	Prkd1	3.26989	3.1952	3.24426	3.21892	3.20298	3.24631	3.09069	3.10178	3.05566	3.19987	3.069	3.25226	2.91493	2.87771	2.90926	2.86502	2.88574	2.82069	4.03391	4.05803	3.99932	4.08446	4.02575	4.08567	4.31418	4.34725	4.27692	4.37196	4.30878	4.32597	4.2045	4.20042	4.18056	4.18368	3.23645	3.22274	3.08271	3.17371	2.89632	2.88667	4.03042	4.0653	4.31278	4.33557	4.20246	4.18212	9.31039	-0.189843
ENSMUSG00000002699	Lcp2	1.71267	1.73319	1.66117	1.66271	1.64274	1.68473	NA	NA	NA	NA	NA	NA	2.0935	2.02695	2.01418	2.04137	2.07464	2.03024	2.08643	2.10312	2.09414	2.09931	2.10757	2.10562	3.00697	3.00708	3.03695	3.02623	3.07677	3.04414	3.16172	3.17643	3.18001	3.1827	1.70234	1.66339	NA	NA	2.06023	2.04339	2.09456	2.10417	3.017	3.04905	3.16908	3.18136	2.92098	-1.7345
ENSMUSG00000002718	Cse1l	9.98149	10.1356	10.1804	10.4009	10.154	10.1713	9.97976	9.41754	9.91417	9.97986	9.81095	9.86753	9.85828	10.0004	9.81978	9.8866	9.87971	9.6744	10.602	10.5035	10.5175	10.4468	10.5463	10.6373	10.8703	10.8512	10.8301	10.5569	10.6783	10.8828	10.5941	10.6764	10.4531	10.3042	10.0992	10.2421	9.77049	9.88611	9.92934	9.86203	10.541	10.5435	10.8505	10.706	10.6352	10.3787	1163.54	0.205551
ENSMUSG00000002728	Naa20	6.96293	6.95632	6.76513	6.73447	6.81989	6.79605	6.63576	6.32905	6.59744	6.67197	6.69059	6.67178	6.54162	6.52642	6.54863	6.67461	6.65503	6.67633	7.29366	7.21269	7.24004	7.31953	7.27316	7.19913	7.46678	7.31694	7.545	7.44846	7.40548	7.40353	7.31044	7.27306	7.15027	7.25787	6.89479	6.78347	6.52075	6.67811	6.53402	6.62609	7.24879	7.26394	7.4429	7.41916	7.29175	7.20407	113.619	-0.270745
ENSMUSG00000002731	Prkra	5.94637	5.83854	5.86259	5.89431	5.87707	6.01872	5.7609	5.62835	5.38992	5.71404	5.84039	5.59073	5.54747	5.64713	5.56443	5.70365	5.67991	5.66327	6.44194	6.47224	6.39845	6.34409	6.39008	6.46257	6.53656	6.86457	6.68155	6.62473	6.61861	6.71864	6.589	6.68992	6.6855	6.61322	5.8825	5.93003	5.59306	5.71505	5.5973	5.64933	6.43754	6.39891	6.69423	6.65399	6.63946	6.64936	59.9694	0.169917
ENSMUSG00000002732	Fkbp7	3.40556	3.38707	3.46395	3.47757	3.40753	3.40774	2.76165	2.75139	2.81529	2.84938	2.89657	2.81363	2.86038	2.93165	2.88878	2.92506	2.91569	2.87695	4.11388	4.06205	4.06938	4.09373	4.10546	4.11663	3.84711	3.85746	3.86139	3.85952	3.81972	3.89172	4.09259	4.0893	4.09124	4.11033	3.41886	3.43095	2.77611	2.85319	2.89602	2.90984	4.08177	4.10527	3.85532	3.85698	4.09095	4.10078	11.5732	0.128297
ENSMUSG00000002733	Plekha3	4.74507	4.65456	4.65289	4.67433	4.59531	4.67469	4.5943	4.61905	4.67641	4.63263	4.67742	4.48732	4.56413	4.53321	4.4973	4.51228	4.51514	4.45641	5.55053	5.48335	5.42392	5.51516	5.50134	5.51835	5.43651	5.3812	5.41136	5.39691	5.50709	5.40842	5.35289	5.39585	5.36169	5.46861	4.68418	4.64811	4.62992	4.59913	4.54867	4.50824	5.48593	5.51162	5.40969	5.43747	5.37437	5.41515	25.5651	-0.230267
ENSMUSG00000002741	Ykt6	7.80462	7.78674	7.78613	7.87428	7.77144	7.70941	7.52627	7.49916	7.42067	7.49896	7.5988	7.38694	7.47721	7.47446	7.49475	7.49094	7.42387	7.51416	8.25906	8.30253	8.34163	8.30072	8.27147	8.33575	8.23147	8.41119	8.2705	8.19606	8.33251	8.29367	8.42486	8.36351	8.47952	8.40541	7.7925	7.78504	7.48203	7.4949	7.47584	7.46985	8.30107	8.30265	8.30439	8.27408	8.39419	8.44246	222.569	-0.0293724
ENSMUSG00000002748	Baz1b	9.36508	9.27928	9.31852	9.46694	9.44721	9.21386	9.10829	8.95008	9.215	9.07623	8.84587	9.13128	9.28668	9.26818	9.25157	9.26108	9.29924	9.29141	9.78766	9.928	9.5887	9.90223	9.87089	10.0367	10.03	10.0883	9.84384	9.90261	9.92485	10.0837	10.0988	10.003	9.98736	9.93886	9.32096	9.376	9.09112	9.01779	9.27743	9.27063	9.76812	9.9366	9.98736	9.97038	10.0509	9.96311	655.899	0.0849695
ENSMUSG00000002763	Pex6	5.47765	5.39392	5.4383	5.28073	5.41317	5.28035	5.47056	5.73909	5.31903	5.40961	5.38068	5.50147	5.31865	5.24302	5.26776	5.32173	5.08568	5.11865	6.00658	6.09294	6.08514	6.08436	6.15875	6.05851	5.92543	6.05108	5.98826	5.9937	5.8573	5.90597	6.03594	6.01281	6.05515	6.02803	5.43662	5.32475	5.50956	5.43059	5.28084	5.22506	6.06155	6.10054	5.98826	5.91899	6.02438	6.04159	40.7983	-0.456061
ENSMUSG00000002767	Mrpl2	6.99559	7.02255	6.89939	6.82655	6.96603	6.98073	6.98489	7.06256	6.8893	7.02727	6.97298	6.82894	6.85125	6.75177	6.74484	6.79475	6.61495	6.92957	7.66589	7.66564	7.70825	7.64158	7.68046	7.69646	7.64037	7.53837	7.76156	7.75092	7.64979	7.58253	7.65535	7.64594	7.72301	7.71878	6.97251	6.92444	6.97892	6.94307	6.80151	6.71818	7.67993	7.67283	7.64677	7.66108	7.65065	7.7209	122.162	-0.093421
ENSMUSG00000002768	Mea1	7.22896	7.3017	7.25672	6.98461	7.24335	7.33645	7.32067	7.58805	7.40616	7.36663	7.43196	7.44456	7.4296	7.28683	7.37868	7.41201	7.38794	7.63575	8.0126	8.12411	8.08047	8.05762	8.04415	8.02279	7.88687	8.01472	8.00892	8.1142	8.09243	7.94952	8.30722	8.12625	8.34167	8.29919	7.26246	7.18814	7.43829	7.41438	7.35822	7.39288	8.07239	8.04152	7.97017	8.05205	8.21673	8.32043	147.737	-0.115626
ENSMUSG00000002771	Grin2d	NA	NA	NA	NA	NA	NA	NA	NA	NA	NA	NA	NA	NA	NA	NA	NA	NA	NA	2.27013	2.27862	2.29463	2.29219	2.3041	2.28265	2.7952	2.79472	2.8152	2.81432	2.84169	2.80168	3.1658	3.17598	3.14633	3.18068	NA	NA	NA	NA	NA	NA	2.28112	2.29298	2.80171	2.81923	3.17089	3.1635	NA	NA
ENSMUSG00000002778	Kdelr1	7.85381	8.06864	7.86044	7.99658	7.8333	7.90804	7.64886	7.69699	7.6885	7.85036	7.8149	7.60329	7.38176	7.55142	7.68856	7.63486	7.60058	7.52397	8.39242	8.24924	8.45375	8.20777	8.36115	8.26688	8.70741	8.62692	8.78051	8.63944	8.59854	8.68781	8.39042	8.47217	8.48581	8.34864	7.92763	7.91264	7.67812	7.75618	7.46659	7.64133	8.36514	8.2786	8.70495	8.64193	8.4313	8.41723	244.05	-0.049138
ENSMUSG00000002781	Tmem143	6.07398	6.11358	6.01563	5.93526	6.03562	5.99174	5.90881	5.84576	5.85445	5.94945	5.69833	5.77944	5.60253	5.73981	5.77293	5.7014	5.66639	5.82711	6.6846	6.60945	6.69496	6.53584	6.73259	6.60097	7.03572	7.06513	7.09556	6.99345	6.93638	7.06601	6.79963	6.78423	6.79567	6.76746	6.06773	5.98754	5.86967	5.80907	5.67117	5.71357	6.663	6.62313	7.06547	6.99862	6.79193	6.78157	64.1853	-0.244792
ENSMUSG00000002797	Ggct	5.28251	5.29488	5.27698	5.23851	5.29455	5.45436	5.31399	5.35809	5.29492	5.32967	5.38038	5.34643	5.42156	5.36789	5.41435	5.43998	5.49964	5.56042	6.16498	6.10637	6.09242	6.12793	6.0856	6.19304	6.08586	6.10354	6.00667	6.00747	6.03074	6.18576	6.14373	6.20644	6.15042	6.023	5.28479	5.32914	5.32233	5.35216	5.39472	5.45133	6.12126	6.13552	6.06536	6.07466	6.17509	6.08671	38.8785	0.229059
ENSMUSG00000002799	Jag2	5.18723	5.17431	5.06523	5.28308	5.0199	5.14834	5.15325	5.23467	5.10728	4.98898	5.18445	4.8922	4.96815	4.94801	5.01857	4.96791	5.04417	4.98025	5.79951	5.84584	5.89201	5.86082	5.8612	5.79389	5.98982	5.93069	6.07215	6.12976	5.99867	6.03486	6.15315	6.10528	6.12997	6.20599	5.14226	5.15044	5.16507	5.02188	4.95808	5.01022	5.84579	5.83864	5.99755	6.05443	6.12921	6.16798	37.3961	0.030172
ENSMUSG00000002803	Btbd6	6.10028	5.98625	6.0094	5.83295	6.00871	6.0351	6.01404	6.42412	6.04721	6.10671	6.11043	5.97844	6.10865	6.08045	6.12708	6.08863	6.18194	6.04506	6.85626	6.87093	6.9343	6.90575	6.8212	6.8252	6.8399	6.90982	6.89915	7.00199	6.92192	6.88538	6.87816	6.84909	6.96002	6.93102	6.03198	5.95892	6.16179	6.06519	6.09455	6.13255	6.88717	6.85072	6.88296	6.93643	6.86363	6.94552	62.1175	-0.206256
ENSMUSG00000002804	Nudt14	5.18796	5.20147	5.04882	5.3137	5.17987	5.1626	4.92928	4.87586	4.95338	4.95983	5.03528	4.88585	4.4903	4.60873	4.56562	4.59585	4.5669	4.48034	5.51049	5.47422	5.57162	5.50485	5.51047	5.44984	5.62545	5.57338	5.6565	5.5833	5.63681	5.54565	5.67062	5.64977	5.72385	5.66996	5.14608	5.21872	4.91951	4.96032	4.54951	4.57612	5.51878	5.48839	5.61844	5.58858	5.6602	5.6969	38.0634	0.30262
ENSMUSG00000002808	Epdr1	9.79324	9.95896	10.085	9.93587	10.0414	10.0639	9.97305	9.66361	9.7487	9.98482	9.82441	9.87736	9.50658	9.69568	9.65502	9.62357	9.69071	9.66067	10.5442	10.2914	10.4365	10.2078	10.2468	10.3418	10.8934	10.6202	10.8401	10.5778	10.651	10.6981	10.36	10.6162	10.2593	10.0561	9.94575	10.0137	9.79512	9.89553	9.60113	9.65643	10.424	10.2655	10.7846	10.6423	10.4881	10.1577	1013.77	0.100541
ENSMUSG00000002812	Flii	7.51512	7.3937	7.19115	7.27513	7.27397	7.29539	7.2499	7.38612	7.1351	7.08811	7.14146	7.11169	7.07387	7.0479	7.2007	7.06716	7.1609	7.11361	7.97138	8.05745	7.94771	7.92511	8.0261	7.99471	7.94903	8.16139	7.94734	8.1354	8.05141	7.99046	8.23163	8.11802	8.20167	8.17488	7.36666	7.2815	7.25704	7.11375	7.06089	7.14292	7.99218	7.98197	8.01925	8.05909	8.17482	8.18828	160.454	-0.200348
ENSMUSG00000002814	Top3a	3.89812	3.82785	3.83009	3.79054	3.90873	3.8733	3.52625	3.65651	3.52309	3.46679	3.46214	3.47224	3.32836	3.32494	3.32149	3.364	3.30918	3.31428	4.34694	4.34094	4.3044	4.35295	4.35471	4.38216	4.31965	4.31591	4.28818	4.25003	4.24787	4.31212	4.61217	4.64309	4.5746	4.62239	3.85202	3.85752	3.56862	3.46706	3.32665	3.33156	4.33076	4.36327	4.30792	4.27001	4.62763	4.5985	13.6675	0.0756615
ENSMUSG00000002820	Atg4d	4.27489	4.35375	4.27809	4.60038	4.27818	4.26382	3.94198	3.91771	3.89139	3.91546	3.90708	3.97904	4.09685	4.08527	4.09909	4.07762	4.13313	4.12335	4.65785	4.70231	4.64164	4.65211	4.64062	4.70555	4.81097	4.8669	4.77343	4.83979	4.79003	4.80021	4.95862	4.98799	5.06525	5.08855	4.30224	4.38079	3.91703	3.93386	4.09106	4.10328	4.66726	4.66609	4.8171	4.81001	4.9733	5.0769	24.1581	0.627201
ENSMUSG00000002825	Qtrt1	4.34017	4.43029	4.45542	4.44975	4.30939	4.37633	4.4176	4.63596	4.41913	4.46324	4.55783	4.40572	4.13769	4.09309	4.09398	4.05677	4.04854	4.08826	5.04979	4.92655	5.01378	4.99827	5.01243	4.95833	4.66195	4.69767	4.7588	4.72678	4.72573	4.71405	4.9495	4.9593	5.02393	4.97918	4.40863	4.37849	4.4909	4.4756	4.11539	4.06643	4.99671	4.98968	4.70614	4.72219	4.9544	5.00156	22.0032	-0.228126
ENSMUSG00000002833	Hdgfl2	8.5575	8.5333	8.4484	8.39147	8.4	8.47113	8.41512	8.63135	8.51271	8.49077	8.45984	8.32462	8.41784	8.13725	8.23646	8.28659	8.31191	8.30283	9.18491	9.06008	9.07661	9.12745	8.90025	8.98722	9.06923	9.01649	9.2142	9.07804	9.12203	9.01259	9.08582	9.17885	8.98404	9.11912	8.51307	8.42087	8.51973	8.42508	8.27755	8.27832	9.1072	9.00497	9.09997	9.07089	9.13233	9.05158	353.505	-0.155022
ENSMUSG00000002835	Chaf1a	3.87187	3.8146	3.93545	3.92841	3.83061	3.88709	3.4962	3.40604	3.39243	3.42872	3.44999	3.42986	4.10304	3.99073	4.00158	4.02259	4.04464	4.12555	4.19611	4.21239	4.15395	4.19138	4.2261	4.21235	4.25308	4.31749	4.20508	4.36154	4.21029	4.23549	4.41864	4.44336	4.42795	4.40848	3.87397	3.88204	3.43155	3.43619	4.04688	4.02294	4.18748	4.20994	4.25855	4.26911	4.431	4.41821	15.5901	0.0611425
ENSMUSG00000002844	Adprh	9.10589	9.16489	9.26131	9.17611	9.06949	9.27358	9.06276	9.00116	8.80834	9.07949	8.88537	8.88314	8.91498	8.81845	9.03137	8.95684	8.84525	9.17684	9.60933	9.58206	9.61357	9.51469	9.46963	9.56682	9.73623	9.68447	9.79893	9.64305	9.59378	9.61698	9.7059	9.6612	9.65953	9.68452	9.17736	9.17306	8.95742	8.94933	8.86671	8.94449	9.60165	9.51705	9.73988	9.61794	9.68355	9.67202	579.829	-0.00258291
ENSMUSG00000002845	Tmem39a	2.04704	2.07977	2.08269	2.03737	2.05658	2.07833	2.37614	2.31478	2.31426	2.32078	2.36416	2.36206	2.60793	2.57339	2.59006	2.59261	2.56362	2.53163	2.61766	2.57793	2.60403	2.58311	2.59584	2.58625	3.4422	3.48249	3.47703	3.45374	3.43118	3.47763	3.21337	3.21195	3.18738	3.20518	2.06983	2.05743	2.33506	2.349	2.59066	2.5821	2.59987	2.5884	3.46724	3.45419	3.21266	3.19628	3.87936	-0.351111
ENSMUSG00000002846	Timmdc1	6.05392	6.02482	6.21337	5.92151	6.12349	6.15896	5.86579	5.80063	5.68077	5.79586	5.93119	5.69714	5.78385	5.80365	5.92621	5.92648	5.87308	5.91202	6.6738	6.74826	6.75419	6.77915	6.7483	6.65341	6.87626	6.81459	6.802	6.81368	6.91094	6.78301	6.65735	6.68994	6.62689	6.62946	6.09737	6.06799	5.78239	5.80806	5.79375	5.90859	6.72542	6.72695	6.83095	6.83588	6.67364	6.62817	66.5501	-0.0615157
ENSMUSG00000002870	Mcm2	4.15878	4.1109	4.07623	4.05757	4.0448	4.09551	3.96922	4.10576	3.92071	3.97285	3.94393	3.84071	4.09554	4.09758	4.15702	4.12749	4.11619	4.10496	4.83742	4.95011	4.85829	4.84917	4.87672	4.84169	4.93659	4.94312	4.87167	4.93117	4.94855	4.99654	4.89117	4.80742	4.8472	4.86899	4.1153	4.06596	3.99856	3.91916	4.09656	4.13356	4.88194	4.85586	4.91712	4.95875	4.8493	4.85809	16.6282	-0.41492
ENSMUSG00000002871	Tpra1	5.20914	5.26711	5.21079	5.00447	5.19545	5.22676	5.17588	5.22999	5.23906	5.2182	5.20188	5.487	4.97055	4.98672	5.04135	5.03659	4.90579	5.09351	5.90564	5.88498	6.02728	5.8589	5.91022	5.8066	5.8565	5.85717	6.09237	5.94401	5.99666	5.92744	6.03221	6.04333	6.06614	6.08499	5.22901	5.14223	5.21498	5.30236	4.97863	4.99458	5.9393	5.85857	5.93535	5.95604	6.03777	6.07557	34.4061	-0.377171
ENSMUSG00000002881	Nab1	4.83984	4.8013	4.81601	4.62753	4.8248	4.80495	4.92107	4.67051	4.91443	4.73436	4.88477	5.07909	4.75556	4.8069	4.79467	4.75481	4.87737	4.74547	5.63956	5.62418	5.55195	5.55609	5.56202	5.66242	5.7574	5.82834	5.70808	5.78143	5.81819	5.8489	5.60218	5.72561	5.64738	5.62221	4.81905	4.75243	4.83534	4.89941	4.78123	4.80895	5.60523	5.59351	5.76461	5.81618	5.66389	5.6348	25.8242	-0.358547
ENSMUSG00000002885	Adgre5	NA	NA	NA	NA	NA	NA	NA	NA	NA	NA	NA	NA	NA	NA	NA	NA	NA	NA	2.64268	2.61849	2.59677	2.65969	2.6433	2.65593	3.03538	3.02982	2.99468	2.9871	3.072	3.04907	2.74218	2.78594	2.79123	2.77066	NA	NA	NA	NA	NA	NA	2.61932	2.65298	3.01996	3.03606	2.76406	2.78095	NA	NA
ENSMUSG00000002897	Il17ra	6.55271	6.55863	6.60252	6.4538	6.66541	6.40937	6.44441	6.51155	6.58692	6.2822	6.36287	6.41586	6.10142	6.21497	6.125	6.18674	6.2391	6.30716	7.1381	7.13112	7.11217	7.04892	7.23342	7.03651	7.31882	7.34442	7.43035	7.41673	7.31227	7.3355	7.30572	7.35327	7.26389	7.33414	6.57129	6.50953	6.5143	6.35365	6.15819	6.18362	7.12713	7.10628	7.36453	7.35483	7.32949	7.29902	92.6638	-0.13524
ENSMUSG00000002900	Lamb1	6.14329	6.09291	6.09128	6.06783	6.12638	6.09128	5.83557	5.84281	5.7638	5.89929	5.70608	5.96	5.91138	5.82188	5.86126	5.92827	5.96208	5.93633	6.45482	6.45416	6.32018	6.47965	6.45615	6.36372	6.75945	6.79844	6.79988	6.96014	6.90632	6.80172	7.03251	7.05466	7.12298	7.10187	6.10916	6.09517	5.81406	5.85513	5.86663	5.9172	6.40972	6.43317	6.78592	6.88939	7.04358	7.11242	68.2734	-0.0362687
ENSMUSG00000002908	Kcnn1	4.51841	4.44507	4.46273	4.47319	4.47048	4.43928	4.31437	4.36317	4.26165	4.19549	4.32388	4.26745	4.43181	4.37586	4.43899	4.35661	4.38304	4.38365	5.08998	5.0922	5.21614	5.05541	5.0646	5.04367	5.1027	5.05065	5.17767	5.11833	5.20085	5.12663	5.09336	5.02635	4.99456	5.09971	4.4754	4.46098	4.31306	4.26227	4.40383	4.39288	5.13277	5.05456	5.11034	5.14861	5.05985	5.04713	22.2345	-0.104989
ENSMUSG00000002910	Arrdc2	2.93079	2.98517	2.89907	2.85563	2.89892	2.84282	3.66227	3.7378	3.82864	3.68972	3.75503	3.70087	3.11448	3.04021	3.10616	3.06674	3.04929	3.1434	3.89493	3.828	3.84404	3.82473	3.83585	3.82667	3.80411	3.83177	3.78384	3.83977	3.80752	3.73662	3.629	3.62199	3.69183	3.61499	2.93834	2.86579	3.7429	3.71521	3.07734	3.07406	3.85566	3.82908	3.80658	3.79463	3.62549	3.65341	6.9333	-1.37652
ENSMUSG00000002944	Cd36	2.07927	2.14189	2.10256	2.07021	2.06178	2.12696	2.17079	2.12491	2.21848	2.21406	2.19745	2.12749	NA	NA	NA	NA	NA	NA	2.55282	2.55312	2.59822	2.56627	2.59197	2.59774	3.09797	3.11744	3.13815	3.15856	3.11196	3.09765	3.26285	3.20395	3.22411	3.21498	2.10791	2.08632	2.17139	2.17967	NA	NA	2.56805	2.58533	3.11786	3.12272	3.2334	3.21955	3.94841	-0.634386
ENSMUSG00000002949	Timm44	6.98053	7.02485	6.91092	6.79449	6.90015	7.07218	6.87933	6.84907	6.81492	6.72879	6.91506	6.74187	7.10218	6.84624	7.03055	6.86048	7.16789	6.96253	7.40658	7.36945	7.461	7.39335	7.28028	7.44644	7.46079	7.42096	7.4995	7.45366	7.57652	7.60355	7.59224	7.64624	7.63643	7.69903	6.9721	6.92228	6.84777	6.79524	6.97421	7.01964	7.41234	7.37336	7.46042	7.54458	7.61924	7.66773	122.006	-0.0851125
ENSMUSG00000002957	Ap2a2	10.7797	10.7993	10.7396	10.8141	10.8242	10.7677	10.6144	10.5167	10.6401	10.5911	10.5288	10.4637	10.6912	10.7044	10.6739	10.6925	10.6951	10.598	11.327	11.3964	11.2747	11.4995	11.4	11.4026	11.4597	11.5425	11.3847	11.4388	11.327	11.4356	11.4012	11.2919	11.5434	11.4648	10.7729	10.802	10.5904	10.5279	10.6978	10.6872	11.3327	11.434	11.4623	11.4005	11.3465	11.5041	1768.32	0.0404284
ENSMUSG00000002963	Pnkp	5.16474	5.02743	5.0527	5.00542	5.09303	5.18088	4.95154	4.95085	4.79801	4.84496	4.87113	4.79671	5.13526	5.01206	5.11766	5.06362	5.10064	5.2217	5.6957	5.79019	5.74306	5.7009	5.72552	5.62614	5.68223	5.68733	5.70423	5.74127	5.7114	5.76331	5.82196	5.77677	5.90232	5.88254	5.08162	5.09311	4.90014	4.8376	5.07366	5.09397	5.74298	5.68418	5.69126	5.73866	5.79936	5.89243	33.0983	0.0758532
ENSMUSG00000002968	Med25	6.21897	6.34572	6.07489	5.93535	6.33622	6.13331	6.28415	6.51426	6.35956	6.34841	6.41589	6.38261	6.15711	6.20753	6.26755	6.18241	6.17215	6.37365	6.91933	6.97581	7.04645	6.9482	7.02973	6.93546	7.11842	7.18526	7.25476	7.21849	7.07747	7.1463	7.11868	7.17139	7.14245	7.1024	6.21319	6.13496	6.38599	6.3823	6.18232	6.20737	6.98053	6.97113	7.18615	7.14742	7.14504	7.12243	70.2564	-0.214108
ENSMUSG00000002980	Bcam	3.38191	3.30034	3.32964	3.29628	3.33492	3.36621	3.18919	3.29239	3.18169	3.26234	3.22419	3.15829	2.6829	2.72386	2.73328	2.72493	2.71935	2.71226	3.9377	3.96173	3.94903	3.96284	3.91748	3.93721	4.39817	4.3459	4.30745	4.45489	4.37786	4.38284	3.92066	3.97783	3.96976	3.95158	3.3373	3.33247	3.22109	3.21494	2.70338	2.72585	3.94949	3.93918	4.35051	4.40519	3.94925	3.96067	9.62646	-0.0483863
ENSMUSG00000002981	Clptm1	10.064	9.9948	9.9889	9.97123	9.99957	10.0303	9.74054	10.0553	9.82702	9.80785	9.88201	9.65885	9.63088	9.68061	9.67111	9.70262	9.60264	9.53021	10.6046	10.5417	10.6338	10.578	10.6742	10.5135	10.6483	10.6254	10.7565	10.7341	10.651	10.5824	10.6102	10.6365	10.4779	10.6289	10.0159	10.0004	9.8743	9.7829	9.65574	9.65879	10.5934	10.5886	10.6767	10.6558	10.6234	10.5534	1029.71	-0.0208615
ENSMUSG00000002983	Relb	3.48875	3.45225	3.5137	3.57944	3.50916	3.49917	2.99402	3.10719	3.24366	2.96867	3.04735	3.09701	3.70233	3.63166	3.66535	3.6379	3.78568	3.63945	3.62357	3.64778	3.62071	3.62898	3.62093	3.61438	3.83044	3.84788	3.84281	3.84258	3.89451	3.87237	4.0649	4.03052	4.03711	4.06059	3.4849	3.52926	3.11496	3.03768	3.66699	3.69631	3.63069	3.62143	3.84037	3.86982	4.04771	4.04885	12.4143	0.488079
ENSMUSG00000002984	Tomm40	7.41868	7.36157	7.32254	7.18703	7.20919	7.24744	7.18059	7.60283	7.47572	7.31836	7.37029	7.35513	7.17302	7.1729	7.15917	7.24199	7.12423	7.28579	7.9477	8.01518	8.14624	8.02608	8.1372	7.87842	8.01744	8.04334	8.00926	8.12542	8.09532	8.03968	7.99647	8.0875	8.25333	8.18999	7.3676	7.21455	7.41971	7.34793	7.17296	7.17513	8.03637	8.0139	8.02334	8.08681	8.04198	8.22166	156.009	-0.322088
ENSMUSG00000002985	Apoe	9.25754	8.80521	8.92689	9.01002	8.89158	9.21108	9.933	9.77347	9.79128	9.25506	9.70879	10.774	8.84069	8.56885	8.76329	8.7845	8.55308	8.85969	9.80105	9.72769	9.5997	9.6638	9.64306	9.75086	10.0757	10.3412	10.2701	10.6951	10.429	10.2414	10.6293	10.5356	11.1796	11.5067	8.99655	9.03756	9.83258	9.91263	8.70477	8.70029	9.70948	9.68591	10.229	10.4552	10.5824	11.3432	524.924	0.053262
ENSMUSG00000002996	Hbp1	4.8845	4.94112	4.82302	4.94598	4.91063	4.88964	4.82272	4.83593	4.90975	5.01334	4.99719	5.05576	5.14768	5.09981	5.12251	5.0242	4.96416	5.03529	5.5479	5.50531	5.50973	5.55765	5.49318	5.63224	5.67181	5.65962	5.76004	5.62941	5.66057	5.64385	5.80838	5.80082	5.78682	5.78371	4.88288	4.91542	4.85614	5.02209	5.12374	5.03696	5.52098	5.56102	5.69716	5.64461	5.8046	5.78527	30.3655	0.149753
ENSMUSG00000002997	Prkar2b	8.23714	8.2964	8.33904	8.39191	8.18116	8.39159	8.03309	7.9394	7.99195	8.10877	8.03056	7.94637	8.09377	8.04812	8.02084	8.07158	8.18876	8.11813	8.70617	8.70614	8.75929	8.72637	8.69742	8.67198	8.95756	8.88086	9.03538	8.71271	8.89195	8.93809	8.92911	8.9413	8.80167	8.76506	8.29086	8.32155	7.98815	8.02857	8.07095	8.09373	8.72387	8.69859	8.95793	8.84759	8.9352	8.78336	318.722	0.0516693
ENSMUSG00000003031	Cdkn1b	6.77236	6.81974	6.86123	6.5932	6.83785	6.92222	6.82791	6.71323	6.52028	6.67108	6.66623	6.49896	6.51558	6.49378	6.51283	6.57697	6.50977	6.79274	7.28633	7.16403	7.21599	7.17514	7.22037	7.18372	7.46831	7.36055	7.47564	7.38151	7.42587	7.36306	7.2366	7.26034	7.29925	7.29557	6.81778	6.78442	6.68714	6.61209	6.50468	6.53319	7.22212	7.19308	7.43483	7.39015	7.24847	7.29741	109.767	-0.0349038
ENSMUSG00000003033	Ap1m1	7.94781	7.93765	7.91604	8.07129	7.81325	7.84358	7.77577	7.85167	7.71929	7.69736	7.75687	7.55805	7.50837	7.69966	7.50236	7.63946	7.51149	7.54894	8.43137	8.34697	8.37947	8.36118	8.46341	8.38346	8.58439	8.60273	8.62149	8.49876	8.4697	8.55667	8.68175	8.63674	8.6675	8.68391	7.93384	7.90937	7.78224	7.67076	7.60401	7.5511	8.38594	8.40268	8.60287	8.50838	8.65924	8.6757	245.38	-0.0642077
ENSMUSG00000003037	Rab8a	6.83355	6.74444	6.8738	6.90798	6.81967	6.81096	6.4355	6.39922	6.45561	6.59518	6.67195	6.56779	6.43518	6.47435	6.47684	6.51099	6.33654	6.56827	7.30511	7.14792	7.15304	7.25271	7.23152	7.29491	7.46202	7.4062	7.5086	7.4236	7.38771	7.44483	7.46348	7.49387	7.3768	7.43199	6.81726	6.84621	6.43011	6.61164	6.45476	6.44146	7.20202	7.25971	7.45894	7.41871	7.47868	7.40439	115.258	0.0575821
ENSMUSG00000003038	Hmgn2	NA	NA	NA	NA	NA	NA	2.1667	2.25099	2.25355	2.18019	2.32152	2.35496	2.23433	2.22691	2.17177	2.2184	2.19667	2.19906	3.12291	3.12346	3.16369	3.15754	3.14274	3.1406	3.05553	3.08321	3.05765	3.14043	3.12511	3.0433	2.73945	2.76505	2.74972	2.74977	NA	NA	2.22375	2.28556	2.23062	2.19561	3.13669	3.14696	3.06546	3.10295	2.75225	2.74974	NA	NA
ENSMUSG00000003039	Fam32a	5.98947	5.98042	6.0243	5.87002	6.09863	5.99972	5.98526	6.10387	6.00553	6.01675	6.01572	5.95389	5.99626	5.8599	5.91746	5.98423	5.99045	6.08024	6.68685	6.71137	6.72039	6.66959	6.59199	6.7037	6.56918	6.44606	6.55839	6.59107	6.78782	6.50041	6.72036	6.70621	6.56553	6.6473	5.99806	5.98946	6.03155	5.99545	5.92808	5.96405	6.7062	6.65509	6.52455	6.62644	6.71329	6.60641	62.47	0.0103933
ENSMUSG00000003062	Stard3nl	6.31145	6.4179	6.29362	6.24695	6.39947	6.33378	6.23679	6.14313	6.33088	6.17542	6.2159	6.13563	6.34972	6.41994	6.31977	6.3907	6.33006	6.44439	6.88308	6.9026	6.99694	6.99768	6.95241	6.92703	7.01513	6.98069	7.01107	6.9889	7.02204	6.93951	6.8389	6.9342	7.01887	6.93197	6.34099	6.32673	6.23693	6.17565	6.38483	6.34684	6.92754	6.95904	7.0023	6.98348	6.88655	6.97542	79.663	-0.0250624
ENSMUSG00000003068	Stk11	6.37365	6.25015	6.22942	6.05345	6.27495	6.17116	6.0559	6.50978	6.32388	6.02909	6.21551	6.28262	6.10425	6.01274	6.11617	6.08275	6.03393	6.08123	6.95381	6.94501	7.01512	6.98513	7.15559	6.94094	6.94508	6.96841	7.01614	7.04138	6.94251	6.88661	7.06309	6.89158	7.0138	7.09172	6.28441	6.16652	6.29652	6.17574	6.05849	6.07762	6.97131	7.02722	6.97654	6.95683	6.97733	7.05276	73.2454	-0.324972
ENSMUSG00000003070	Efna2	2.97657	2.96813	2.92638	2.95815	2.89674	3.02705	3.12503	3.15342	3.16261	3.05496	3.0797	3.09398	2.86442	2.81128	2.8435	2.81545	2.87219	2.84368	3.62835	3.66045	3.68696	3.66578	3.6295	3.66445	3.51601	3.54707	3.53219	3.61534	3.56028	3.52159	3.69861	3.73709	3.74104	3.77423	2.95702	2.96065	3.14702	3.07622	2.83785	2.84371	3.65859	3.65324	3.53176	3.56574	3.71785	3.75764	7.75205	0.0812538
ENSMUSG00000003072	Atp5d	9.83986	9.76002	9.64785	10.0852	9.62546	9.89351	9.66093	9.82349	9.6769	9.65816	9.76876	9.60604	9.35177	9.3685	9.70678	9.45488	9.45373	9.83189	10.2721	10.1818	10.436	10.2057	10.1456	10.0174	10.1935	10.3158	10.4357	10.247	10.2642	10.1725	10.2537	10.2795	10.4183	10.4374	9.74924	9.86806	9.72044	9.67765	9.36014	9.53846	10.2966	10.1229	10.315	10.2279	10.2666	10.4279	910.378	0.186904
ENSMUSG00000003099	Ppp5c	9.15284	9.10939	8.98422	9.14607	9.10063	9.05965	9.03784	9.23956	8.98871	8.96773	9.07233	8.96498	8.87109	9.01047	9.02765	9.05186	9.06651	9.06622	9.81156	9.88527	9.76481	9.90381	9.81721	9.81697	9.8157	9.86948	9.78154	9.92624	9.8427	9.90411	9.83325	9.90632	9.94928	9.93542	9.08215	9.10212	9.0887	9.00168	8.94078	9.04868	9.82054	9.846	9.82224	9.89102	9.86979	9.94235	547.105	0.0206406
ENSMUSG00000003119	Cdk12	7.29403	7.34517	7.34157	7.11157	7.42537	7.44338	7.1479	7.04688	7.15473	7.14513	7.27376	7.29183	7.3455	7.3248	7.23587	7.23593	7.38941	7.29672	7.96804	8.04603	8.06271	8.06572	7.91545	7.96538	8.03244	7.77027	7.95014	7.95167	7.9878	7.93943	7.92134	8.13791	7.87046	7.92863	7.32693	7.32677	7.1165	7.23691	7.33515	7.28707	8.02559	7.98218	7.91762	7.95964	8.02963	7.89955	158.946	0.0470996
ENSMUSG00000003123	Lipe	3.84576	3.8183	3.83062	3.90571	3.8227	3.75045	3.25649	3.33085	3.29523	3.1733	3.27074	3.2329	2.97958	2.99408	2.95172	2.93659	3.05219	2.95005	4.10205	4.03471	4.06117	4.10742	4.0486	4.08181	4.18626	4.16659	4.21361	4.19152	4.23965	4.23727	4.3926	4.36346	4.40123	4.40358	3.83156	3.82629	3.29419	3.22565	2.98683	2.98017	4.06598	4.07928	4.18882	4.22281	4.37803	4.40241	15.3235	-0.0632533
ENSMUSG00000003131	Pafah1b2	9.48559	9.71283	9.63916	9.58632	9.74659	9.58537	9.60865	9.42326	9.47055	9.69735	9.63008	9.62975	9.60493	9.69162	9.48856	9.58877	9.62224	9.59445	10.3023	10.2543	10.2089	10.3012	10.2427	10.2792	10.5055	10.5922	10.5438	10.4227	10.3956	10.4533	10.2605	10.4371	10.3801	10.309	9.61252	9.63942	9.50082	9.65239	9.64828	9.56652	10.2551	10.2743	10.5472	10.4239	10.3488	10.3445	792.38	0.0432475
ENSMUSG00000003134	Tbc1d8	6.00884	5.92856	5.86127	5.82702	5.94994	5.92219	5.4383	5.66847	5.37325	5.43157	5.40593	5.38083	5.82041	5.92634	5.79621	5.81476	5.86785	5.83822	6.50241	6.57974	6.56268	6.63168	6.55252	6.48099	6.39564	6.3177	6.35922	6.37841	6.43875	6.35927	6.65341	6.59797	6.51055	6.61042	5.93289	5.89972	5.49334	5.40611	5.87338	5.82627	6.54828	6.55506	6.35752	6.39214	6.62569	6.56049	59.3266	-0.0978773
ENSMUSG00000003135	Cnot11	7.73023	7.73657	7.72546	7.76966	7.73476	7.69348	7.58054	7.53362	7.60255	7.62011	7.64224	7.74741	7.47073	7.40405	7.44245	7.443	7.51059	7.32874	8.1595	8.15294	8.172	8.14387	8.24652	8.11425	8.54644	8.48965	8.53735	8.40751	8.42547	8.47142	8.35231	8.37122	8.27649	8.32737	7.73075	7.73263	7.57224	7.66992	7.43739	7.46535	8.16148	8.16821	8.52448	8.4348	8.36176	8.30193	213.107	-0.00415998
ENSMUSG00000003153	Slc2a3	9.42295	9.37795	9.34418	9.29679	9.28566	9.35795	9.11778	9.22435	9.36232	9.17369	9.31811	9.43819	9.0701	8.95508	9.14824	9.02068	8.98311	9.0112	9.79512	9.61951	9.81694	9.72206	9.76733	9.73123	9.90581	9.91753	10.0711	10.0734	10.0487	9.94101	9.93975	10.0908	9.99523	10.1263	9.38169	9.31347	9.23482	9.31	9.01259	9.05068	9.74385	9.74021	9.96482	10.021	10.0153	10.0608	651.47	-0.104436
ENSMUSG00000003154	Foxj2	6.93768	6.96734	6.80292	6.77176	6.91493	6.82482	6.70028	6.93791	6.84264	6.70497	6.74546	6.7706	6.70853	6.69201	6.61192	6.74346	6.6839	6.66797	7.43347	7.44375	7.5049	7.48402	7.52031	7.50006	7.55084	7.66972	7.63767	7.71523	7.693	7.53492	7.44091	7.50912	7.43633	7.57191	6.90264	6.83717	6.82694	6.74034	6.70027	6.67976	7.4607	7.50147	7.61941	7.64772	7.47501	7.50412	115.974	-0.148831
ENSMUSG00000003161	Sri	7.48057	7.43721	7.31707	7.28873	7.4198	7.37485	7.32523	7.4103	7.41696	7.36703	7.47726	7.56685	7.23611	7.17163	7.20892	7.17909	7.14361	7.31376	8.0598	7.97665	7.99509	7.96574	8.00256	8.00151	8.05189	8.11977	8.09772	8.03815	8.05861	8.11252	8.1414	8.10746	8.2717	8.17532	7.41162	7.36113	7.38416	7.47038	7.20387	7.17721	8.01052	7.98994	8.08979	8.06976	8.12443	8.22351	166.355	-0.0966982
ENSMUSG00000003166	Dgcr2	NA	NA	NA	NA	NA	NA	NA	NA	NA	NA	NA	NA	NA	NA	NA	NA	NA	NA	2.10657	2.13997	2.15213	2.14596	2.12247	2.10424	NA	NA	NA	NA	NA	NA	NA	NA	NA	NA	NA	NA	NA	NA	NA	NA	2.13289	2.12422	NA	NA	NA	NA	NA	NA
ENSMUSG00000003184	Irf3	4.88373	4.83083	4.85135	5.03309	4.83579	4.84581	4.38736	4.41148	4.36441	4.29336	4.37531	4.17746	4.07342	4.12518	4.13584	4.16309	4.15117	4.09033	5.12143	5.09017	5.09508	5.05423	5.08968	5.04985	5.61903	5.63824	5.60879	5.64281	5.57881	5.57361	5.55283	5.62439	5.52957	5.46445	4.85531	4.9049	4.38775	4.28204	4.0993	4.15003	5.10223	5.06459	5.62202	5.59841	5.58861	5.49701	31.666	0.247496
ENSMUSG00000003198	Zfp959	3.55318	3.50909	3.57277	3.55657	3.64606	3.51222	3.51673	3.41202	3.6357	3.59746	3.49094	3.59879	3.48744	3.55456	3.46259	3.53886	3.52183	3.49666	3.87955	3.84151	3.89362	3.88678	3.87395	3.96548	4.3461	4.2297	4.29269	4.15695	4.20374	4.25734	4.26392	4.25608	4.2484	4.21001	3.54501	3.57162	3.52148	3.56239	3.521	3.50776	3.87156	3.90874	4.28949	4.20601	4.26	4.22921	11.909	0.321164
ENSMUSG00000003199	Mpnd	6.64464	6.56676	6.49668	6.35518	6.50711	6.56889	6.63568	7.08863	6.85317	6.81	6.89353	6.9214	6.69904	6.47134	6.65378	6.47741	6.46511	6.64839	7.22303	7.28633	7.25875	7.25131	7.22032	7.13264	7.3178	7.31976	7.5377	7.6553	7.49486	7.21436	7.52746	7.4328	7.49855	7.49283	6.56936	6.47706	6.85916	6.87498	6.58519	6.5321	7.25603	7.20142	7.39175	7.45484	7.48013	7.49569	90.3014	-0.221137
ENSMUSG00000003200	Sh3gl1	6.52665	6.50786	6.42884	6.41237	6.48342	6.41269	6.29144	6.50406	6.50688	6.14684	6.45019	6.48766	6.04324	6.02482	6.09017	6.1194	6.15089	6.10844	6.95429	6.94148	6.97335	6.96922	6.85931	6.93313	7.02884	7.17251	7.08839	7.03261	7.09207	7.15529	7.20678	7.24203	7.27343	7.31021	6.48779	6.43616	6.43413	6.36156	6.03403	6.12015	6.95637	6.92055	7.09658	7.09332	7.22441	7.29182	87.587	-0.138223
ENSMUSG00000003206	Ebi3	NA	NA	NA	NA	NA	NA	NA	NA	NA	NA	NA	NA	NA	NA	NA	NA	NA	NA	2.11896	2.11133	2.11767	2.08126	2.07339	2.09394	2.54588	2.49865	2.50925	2.57332	2.5602	2.56269	2.80241	2.78369	2.77774	2.77727	NA	NA	NA	NA	NA	NA	2.11598	2.08286	2.51793	2.5654	2.79305	2.77751	NA	NA
ENSMUSG00000003208	Yju2	4.07512	4.1627	4.14444	4.01164	4.01226	4.13883	4.35489	4.37653	4.41917	4.37796	4.43599	4.56882	4.46145	4.30441	4.26628	4.31459	4.2383	4.36233	5.19363	5.09268	5.23421	5.15057	5.18288	5.14962	5.13111	5.10594	5.07511	5.18599	5.1726	5.12066	5.11211	5.18951	5.08124	5.07904	4.12742	4.05424	4.38353	4.46092	4.38293	4.27306	5.17351	5.16102	5.10405	5.15975	5.15081	5.08014	16.2491	-0.600141
ENSMUSG00000003226	Ranbp2	10.3259	10.3559	10.4167	10.5113	10.5146	10.2818	10.1509	9.49383	10.1112	10.0911	9.76375	10.0232	10.146	10.2664	9.92983	10.1356	10.0856	9.73605	10.6623	10.7291	10.5134	10.639	10.7262	10.7588	11.1334	10.9954	10.8498	10.7289	10.7703	11.031	10.9097	10.9611	10.6738	10.6104	10.3662	10.4359	9.91866	9.95934	10.2062	10.0504	10.6349	10.708	10.9929	10.8434	10.9354	10.6421	1358.43	0.104427
ENSMUSG00000003228	Grk5	4.24267	4.23275	4.22658	4.31743	4.21298	4.26209	4.08561	3.96503	4.0376	4.084	4.0328	4.01208	4.18223	4.16191	4.15505	4.17645	4.19883	4.117	4.90234	4.88311	4.91669	4.91026	4.96686	4.83462	4.69639	4.74936	4.67569	4.69599	4.80415	4.7522	4.98211	5.04916	4.94414	4.96497	4.234	4.26417	4.02941	4.04296	4.17207	4.17678	4.90071	4.90391	4.70714	4.75078	5.01563	4.95455	19.9201	0.206829
ENSMUSG00000003233	Dvl3	7.26981	7.30985	7.19875	7.31998	7.17674	7.13598	7.07937	7.51163	7.2853	7.15441	7.3204	7.18281	7.08173	7.05113	7.15385	7.12227	7.23141	7.17472	7.73171	7.7693	7.8375	7.58753	7.75596	7.69635	7.67514	7.60024	7.8382	7.87474	7.88017	7.75236	7.59381	7.67436	7.71011	7.70781	7.25947	7.2109	7.2921	7.21921	7.06643	7.16918	7.7795	7.67994	7.70453	7.83576	7.63409	7.70896	152.158	-0.128817
ENSMUSG00000003234	Abcf3	7.92309	7.90877	7.86177	7.89519	7.881	7.91357	7.72831	7.87061	7.79732	7.7761	7.82917	7.82076	7.57604	7.62596	7.75097	7.60848	7.62795	7.64229	8.39418	8.44505	8.36079	8.36208	8.38266	8.39613	8.45155	8.53363	8.57883	8.55449	8.4922	8.47099	8.62065	8.63775	8.6684	8.71083	7.89787	7.89659	7.79875	7.80868	7.601	7.66247	8.4	8.38029	8.52134	8.50589	8.6292	8.68961	238.35	-0.00413423
ENSMUSG00000003235	Eif2b5	7.12362	7.04365	6.96652	7.03829	7.11098	6.98334	6.96169	6.91938	7.1244	6.86434	6.82211	6.80045	6.88541	7.01688	7.04527	6.99921	6.87871	7.10762	7.61689	7.6884	7.6997	7.73167	7.73465	7.56646	7.93712	7.76491	7.78266	7.80916	7.74915	7.81977	7.97801	7.83757	7.9158	8.0078	7.04459	7.0442	7.00183	6.82897	6.95114	6.9744	7.66833	7.67759	7.82823	7.79269	7.90779	7.9618	132.094	-0.00450239
ENSMUSG00000003269	Cyth2	9.2737	9.33723	9.32427	9.08004	9.37615	9.33128	9.23413	9.47447	9.33174	9.35196	9.32655	9.44017	9.34495	9.22928	9.18674	9.27161	9.14941	9.23498	10.2481	10.0409	9.96765	9.99405	10.0643	10.0707	10.2608	9.97678	10.1802	10.1368	10.1985	10.1668	10.0802	10.1652	10.0045	10.0252	9.31173	9.26249	9.34678	9.3729	9.28712	9.20259	10.0855	10.043	10.1393	10.1674	10.1227	10.0148	624.786	-0.0493716
ENSMUSG00000003271	Sult2b1	5.55901	5.55925	5.64285	5.3589	5.69345	5.61064	5.34315	5.48776	5.46499	5.48218	5.43995	5.51543	5.64845	5.57665	5.5912	5.59378	5.4956	5.52292	6.14197	6.1173	6.09981	6.11429	6.09914	6.19231	6.4739	6.35063	6.435	6.30781	6.41354	6.35782	6.32664	6.32619	6.37322	6.38173	5.58704	5.55433	5.43197	5.47919	5.61255	5.56019	6.1197	6.13525	6.41984	6.35972	6.32641	6.37747	45.5526	-0.0907462
ENSMUSG00000003273	Car11	8.2014	8.15466	8.10554	8.02904	8.11633	8.11852	7.97739	8.34085	7.93941	8.03752	8.14364	7.78591	7.81526	7.88466	7.91023	7.95264	7.87702	8.07179	8.91051	8.73888	8.82502	8.8828	8.87711	8.62227	8.83412	8.83035	8.83734	9.01845	8.93674	8.694	8.689	8.83544	8.7876	8.81536	8.15387	8.08796	8.08589	7.98902	7.84996	7.9133	8.8248	8.79406	8.83394	8.88306	8.76222	8.80148	277.548	-0.109131
ENSMUSG00000003279	Dlgap1	10.8905	10.7566	10.7349	10.6811	10.8259	10.7019	10.6297	10.865	10.6146	10.658	10.5805	10.693	10.7513	10.6862	10.6848	10.7793	10.7232	10.8016	11.4639	11.4953	11.3107	11.4624	11.5351	11.5388	11.5667	11.5719	11.506	11.5726	11.4287	11.5234	11.5464	11.4337	11.5328	11.5153	10.794	10.7363	10.7031	10.6439	10.7187	10.7291	11.4233	11.5121	11.5482	11.5082	11.49	11.524	1743.21	-0.0805704
ENSMUSG00000003282	Plag1	NA	NA	NA	NA	NA	NA	NA	NA	NA	NA	NA	NA	NA	NA	NA	NA	NA	NA	2.0168	2.00889	2.02835	2.02136	2.01637	2.02805	2.17544	2.14628	2.17613	2.14241	2.14861	2.16091	2.73111	2.76544	2.72478	2.72369	NA	NA	NA	NA	NA	NA	2.01801	2.02193	2.16595	2.15064	2.74828	2.72423	NA	NA
ENSMUSG00000003299	Mrpl4	6.85222	6.80911	6.74319	6.85093	6.64193	6.72106	6.54464	6.8358	6.67173	6.64124	6.6839	6.4506	6.24242	6.35945	6.39729	6.36694	6.40727	6.36554	7.13956	7.19653	7.26471	7.14222	7.19395	7.05415	7.27221	7.19113	7.42196	7.34799	7.36273	7.22666	7.26852	7.36168	7.18003	7.23465	6.80151	6.73797	6.68406	6.59191	6.30093	6.3905	7.20027	7.13011	7.2951	7.31246	7.3151	7.20734	110.583	-0.180079
ENSMUSG00000003308	Keap1	7.21465	7.19891	7.08398	7.10722	7.2096	7.07384	6.88482	7.18337	6.846	6.87723	6.86969	6.8548	6.98731	6.96816	6.97101	7.02139	6.84137	7.0643	7.59009	7.70208	7.68338	7.65469	7.72533	7.75118	7.63837	7.76753	7.7578	7.71452	7.68304	7.75534	7.73645	7.67259	7.90227	7.81276	7.16585	7.13022	6.9714	6.86724	6.97774	6.94459	7.65852	7.7104	7.72124	7.71764	7.70452	7.85752	141.516	-0.0774992
ENSMUSG00000003309	Ap1m2	NA	NA	NA	NA	NA	NA	NA	NA	NA	NA	NA	NA	NA	NA	NA	NA	NA	NA	1.91799	1.89368	1.92978	1.92238	1.91103	1.9409	2.54928	2.52946	2.5498	2.5683	2.572	2.55467	NA	NA	NA	NA	NA	NA	NA	NA	NA	NA	1.91381	1.92477	2.54285	2.56499	NA	NA	NA	NA
ENSMUSG00000003316	Glg1	11.2685	11.1724	11.2297	11.2029	11.2056	11.3542	11.1418	11.1548	11.0689	11.0861	11.1032	10.8878	10.9086	10.8542	10.8085	10.9497	10.9491	10.671	11.8192	11.8102	11.798	11.7539	11.8345	11.7267	11.9858	11.7613	11.9046	11.8935	11.8717	11.7845	11.7566	11.9297	11.7359	11.8176	11.2236	11.2542	11.1218	11.0257	10.8814	10.9024	11.8091	11.7717	11.8839	11.8499	11.8432	11.7768	2420.06	0.0482721
ENSMUSG00000003344	Btbd2	7.2425	7.29265	7.16163	6.99748	7.18811	7.17918	7.19329	7.46518	7.15129	7.14584	7.25458	7.46269	6.97822	7.09627	7.16468	7.00318	7.1274	7.09968	7.75787	7.85562	7.90293	7.76577	7.85559	7.76663	7.72881	7.83708	7.81786	7.9243	7.97793	7.89176	7.94105	7.92517	8.05777	8.05696	7.23226	7.12159	7.26992	7.2877	7.03724	7.09842	7.8388	7.796	7.79458	7.93133	7.93311	8.05737	143.075	-0.218206
ENSMUSG00000003345	Csnk1g2	6.48261	6.46665	6.36232	6.25681	6.38082	6.27176	6.33393	6.44092	6.60328	6.34709	6.23828	6.43178	6.79927	6.66041	6.57469	6.69462	6.64036	6.77988	6.98248	7.06302	7.12218	7.22693	7.26559	7.02553	7.09404	7.01396	6.80776	7.04585	7.09161	6.93228	7.00724	6.96225	7.06706	7.14653	6.43719	6.30313	6.45938	6.33905	6.72984	6.63656	7.05589	7.17268	6.97192	7.02324	6.98475	7.10679	81.7355	-0.368536
ENSMUSG00000003346	Abhd17a	6.82493	6.90742	6.85117	7.05226	6.72896	6.70436	6.34619	6.6935	6.42625	6.3713	6.44669	6.53464	6.50773	6.41433	6.50391	6.4168	6.24821	6.44386	6.95799	7.05126	7.11914	7.10807	7.14729	6.94758	7.11174	7.28545	7.14153	7.2748	7.18584	7.08387	6.99074	7.08498	7.22584	7.38131	6.86117	6.82853	6.48865	6.45088	6.46103	6.38964	7.0428	7.06765	7.17957	7.1815	7.03786	7.30357	118.832	-0.0901926
ENSMUSG00000003348	Mob3a	3.84691	3.90959	3.86568	3.84924	3.87408	3.86236	3.35832	3.47996	3.44557	3.35607	3.51114	3.42579	3.69787	3.70424	3.79965	3.7047	3.74387	3.85401	4.27006	4.27888	4.34212	4.31373	4.28983	4.27878	4.48526	4.5499	4.60378	4.56634	4.51704	4.59903	4.63785	4.56793	4.68343	4.6528	3.87406	3.86189	3.42795	3.431	3.70106	3.74941	4.29702	4.29411	4.54631	4.5608	4.60289	4.66812	14.3539	-0.113182
ENSMUSG00000003352	Cacnb3	8.66038	8.58731	8.63866	8.51699	8.66688	8.5627	8.50448	8.64008	8.53011	8.55355	8.46987	8.58394	8.54855	8.58076	8.68266	8.60246	8.60143	8.78727	9.30494	9.36014	9.3295	9.38933	9.37027	9.31782	9.3665	9.33879	9.18613	9.34724	9.29237	9.26786	9.2633	9.2073	9.2479	9.26899	8.62878	8.58219	8.55822	8.53579	8.56466	8.62885	9.33153	9.35914	9.29714	9.30249	9.2353	9.25844	389.019	-0.0651089
ENSMUSG00000003354	Ccdc65	5.86431	5.94005	5.94981	6.05849	5.84748	5.93885	5.73161	5.59588	5.62068	5.62195	5.65513	5.57515	5.51025	5.53597	5.57821	5.56665	5.60297	5.64811	6.44008	6.44978	6.35066	6.36479	6.3767	6.34375	6.17343	6.27418	6.19704	6.18268	6.15995	6.33638	6.38543	6.40304	6.37769	6.41909	5.91806	5.94827	5.64939	5.61741	5.52311	5.58261	6.41351	6.36175	6.21488	6.22634	6.39424	6.39839	63.0679	0.0822394
ENSMUSG00000003355	Fkbp11	1.96587	1.92928	1.92365	1.96599	1.90728	1.95286	NA	NA	NA	NA	NA	NA	NA	NA	NA	NA	NA	NA	2.23001	2.23038	2.23857	2.23575	2.22087	2.22053	2.11518	2.14049	2.09421	2.10794	2.09682	2.12765	2.67789	2.63094	2.62671	2.66998	1.9396	1.94204	NA	NA	NA	NA	2.23299	2.22572	2.11663	2.1108	2.65441	2.64834	4.15361	0.0557289
ENSMUSG00000003360	Ddx23	8.24208	8.13885	8.30148	8.18209	8.26139	8.1491	7.94463	8.17449	8.15118	7.9942	8.11451	7.98284	7.94651	7.92687	7.91697	7.98174	7.92319	7.89977	8.85113	8.87021	8.76744	8.95156	8.77612	8.78431	8.89353	8.81403	8.84103	8.93292	8.86073	8.73779	8.86043	8.86935	8.85568	8.94451	8.22747	8.19753	8.0901	8.03051	7.93669	7.94064	8.82959	8.83733	8.84953	8.84381	8.86489	8.90009	297.035	-0.0489997
ENSMUSG00000003363	Pld3	12.756	12.6506	12.5968	12.4449	12.6122	12.7406	12.4209	12.8719	12.6296	12.4977	12.6908	12.5076	12.3778	12.2947	12.5032	12.4299	12.3896	12.4948	13.3182	13.2392	13.4268	13.2708	13.3014	13.1215	13.276	13.2449	13.48	13.5118	13.4628	13.2667	13.2602	13.3186	13.2175	13.3317	12.6678	12.5992	12.6408	12.5654	12.3362	12.4409	13.3281	13.2313	13.3336	13.4138	13.2894	13.2746	6379.95	-0.0868182
ENSMUSG00000003378	Grik5	7.68706	7.62631	7.57861	7.37753	7.47517	7.5471	7.22495	7.59338	7.48864	7.34096	7.37397	7.20493	7.3464	7.13901	7.43081	7.29523	7.35313	7.34285	7.92723	8.07109	8.07713	8.0631	7.99967	7.96624	7.95583	7.98266	8.1257	8.1196	8.15203	8.00641	8.02142	7.9383	8.06694	8.1711	7.63066	7.4666	7.43566	7.30662	7.2427	7.35973	8.02515	8.00967	8.0214	8.09268	7.97986	8.11902	186.172	-0.310652
ENSMUSG00000003380	Rabac1	8.75535	8.64153	8.48626	8.43936	8.51359	8.64096	8.46728	8.90183	8.53188	8.54225	8.69622	8.48468	8.42834	8.25005	8.47372	8.48018	8.35058	8.61768	9.24009	9.06996	9.34863	9.20388	9.15172	9.09275	9.07957	9.24455	9.43024	9.47669	9.40964	9.25421	9.38409	9.37974	9.52025	9.43074	8.62771	8.5313	8.63367	8.57439	8.33919	8.43483	9.21956	9.14945	9.25145	9.38018	9.38192	9.47549	382.847	-0.157775
ENSMUSG00000003382	Etv3	5.01235	4.97566	5.04171	4.92711	4.90509	4.98208	4.98035	4.95108	5.12621	5.00231	4.91928	5.08678	4.92968	4.94888	5.08491	5.01607	5.05407	5.08835	5.68333	5.70537	5.77597	5.75537	5.70789	5.74867	5.87818	5.80688	5.82413	5.72496	5.94335	5.94308	5.97285	5.95528	5.96793	6.0086	5.00991	4.93809	5.01921	5.00279	4.93928	5.05168	5.72156	5.73731	5.8364	5.87046	5.96406	5.98826	31.0605	-0.362043
ENSMUSG00000003402	Prkcsh	8.59395	8.47116	8.47472	8.23638	8.49498	8.57938	8.42082	8.74095	8.65616	8.42046	8.56021	8.52995	8.20746	7.94007	8.22682	8.16578	8.11059	8.15553	9.04518	9.01364	9.20429	8.95276	9.05597	8.93892	9.10345	8.93619	9.22196	9.23764	9.28476	9.04791	9.21209	9.28439	9.26326	9.35619	8.51328	8.43691	8.60598	8.50354	8.07376	8.16773	9.08771	8.98255	9.0872	9.1901	9.24824	9.30972	355.163	-0.097022
ENSMUSG00000003410	Elavl3	8.22598	8.21083	8.11416	8.07719	8.0649	8.24195	7.99693	8.21628	8.06914	8.07208	8.05095	8.04947	7.8929	7.9553	8.07241	8.01185	8.05018	8.05802	8.78897	8.77291	8.82641	8.69053	8.70345	8.67627	8.81926	9.02104	8.88539	8.95386	9.01183	8.82342	8.88632	8.90206	8.96464	8.81589	8.18366	8.12801	8.09412	8.0575	7.9241	8.04481	8.7961	8.69008	8.90857	8.9297	8.89419	8.89027	284.867	-0.0893985
ENSMUSG00000003411	Rab3b	7.44398	7.40952	7.37086	7.10265	7.22847	7.45855	7.29842	7.49992	7.29083	7.24998	7.34522	7.38659	7.06311	7.04792	7.03278	6.98626	7.05498	7.00131	8.00864	7.89634	8.19422	8.15033	7.95005	7.92856	8.06073	8.05311	8.25799	8.33355	8.21102	8.00279	8.60131	8.37269	8.65297	8.72133	7.40812	7.26322	7.36306	7.32726	7.05552	7.02467	8.03306	8.00964	8.12394	8.18245	8.487	8.68715	160.189	-0.264569
ENSMUSG00000003418	St8sia6	NA	NA	NA	NA	NA	NA	NA	NA	NA	NA	NA	NA	NA	NA	NA	NA	NA	NA	NA	NA	NA	NA	NA	NA	NA	NA	NA	NA	NA	NA	2.29324	2.28223	2.28224	2.29185	NA	NA	NA	NA	NA	NA	NA	NA	NA	NA	2.28773	2.28704	NA	NA
ENSMUSG00000003420	Fcgrt	NA	NA	NA	NA	NA	NA	NA	NA	NA	NA	NA	NA	1.67243	1.6743	1.6188	1.68421	1.63112	1.62057	3.04467	3.02124	3.02248	3.04653	3.02785	3.05065	3.34387	3.34909	3.34291	3.39541	3.3565	3.29231	3.56177	3.52167	3.51609	3.50791	NA	NA	NA	NA	1.67336	1.64471	3.02946	3.04168	3.34529	3.34807	3.54172	3.512	NA	NA
ENSMUSG00000003421	Nosip	7.23448	7.13623	7.2297	7.41959	7.1157	7.20296	7.09889	7.30983	6.83996	7.05424	6.99585	6.63888	6.79122	6.80515	6.92418	6.91498	6.80822	6.99687	7.88955	7.77366	7.86522	7.81261	7.7132	7.65251	7.65982	7.81304	7.76542	7.72083	7.63529	7.63477	7.95914	7.78285	8.06838	7.98829	7.20014	7.24608	7.08289	6.89632	6.79819	6.88246	7.84281	7.72611	7.74609	7.66363	7.87099	8.02833	153.029	0.0843609
ENSMUSG00000003423	Pih1d1	7.00349	6.92546	6.94379	7.03822	6.93573	6.92803	6.97466	7.18605	6.80642	6.87327	6.83791	6.96596	6.93413	6.86919	6.84369	6.83022	6.83607	6.97576	7.50792	7.59122	7.56971	7.45639	7.48725	7.47739	7.69436	7.75843	7.71798	7.63713	7.6188	7.52956	7.67034	7.57253	7.7098	7.79534	6.95758	6.96733	6.98904	6.89238	6.90166	6.83666	7.55628	7.47368	7.72359	7.59516	7.62143	7.75257	125.855	0.00605049
ENSMUSG00000003429	Rps11	7.12193	7.30575	7.32081	7.13527	7.28615	7.22718	7.39236	7.06919	7.50045	7.26967	7.34685	7.67221	7.30245	7.38959	7.31011	7.37835	7.39772	7.42096	7.9717	7.90692	7.83192	7.89797	7.98913	7.95903	8.02633	8.01662	8.01059	8.02735	8.02391	8.07765	7.88225	8.08595	7.99949	7.97471	7.2495	7.2162	7.32067	7.42958	7.34602	7.36206	7.90351	7.94871	8.01785	8.04297	7.9841	7.9871	149.921	-0.0593379
ENSMUSG00000003435	Supt5	9.5668	9.50106	9.44894	9.59193	9.44928	9.42743	9.37351	9.51228	9.3497	9.30718	9.29321	9.37496	9.32209	9.22095	9.21957	9.26528	9.28092	9.29504	10.1231	9.97598	10.0541	10.0148	10.0507	10.0201	10.118	10.0368	10.193	10.0692	10.0516	10.0678	10.1674	10.047	10.0283	10.1411	9.5056	9.48954	9.41183	9.32512	9.27152	9.25526	10.0511	10.0286	10.1159	10.0629	10.1072	10.0847	725.337	-0.0355601
ENSMUSG00000003437	Paf1	8.25366	8.25248	8.15675	8.40448	8.25717	8.28724	8.05134	7.95846	8.11437	8.16574	8.05378	7.92348	8.077	8.08982	8.12417	8.11195	8.10797	7.89583	8.71058	8.72156	8.67407	8.66016	8.68814	8.75812	8.91005	8.96508	8.88227	8.77539	8.88168	8.94284	8.96905	9.0562	9.00282	9.0848	8.22096	8.3163	8.04139	8.04767	8.08341	8.11469	8.70207	8.70214	8.91913	8.86664	9.01263	9.04381	310.843	0.151207
ENSMUSG00000003438	Timm50	6.15538	6.19097	6.19234	6.12999	6.08972	6.19522	6.1346	6.14747	6.2424	6.16188	6.19982	6.31775	6.20881	6.00853	6.02812	6.11156	6.03053	6.07798	6.5716	6.57108	6.58028	6.57523	6.59824	6.59714	6.86046	6.85642	6.88677	6.79243	6.84256	6.72409	6.73307	6.74778	6.72985	6.70864	6.17956	6.13831	6.17483	6.22648	6.10867	6.05674	6.57432	6.5902	6.86788	6.78636	6.74043	6.71925	71.2215	-0.118448
ENSMUSG00000003444	Med29	3.77308	3.8307	3.79781	3.8639	3.85275	3.88694	3.10673	3.10139	3.11769	3.23201	3.12313	3.07135	3.48405	3.39611	3.44105	3.44001	3.46141	3.44639	4.19926	4.19326	4.15161	4.17211	4.1578	4.19352	4.25805	4.27394	4.26219	4.30861	4.28187	4.23141	4.45629	4.41758	4.49882	4.51394	3.80053	3.86786	3.1086	3.14217	3.44008	3.44749	4.18138	4.17448	4.26473	4.27396	4.43694	4.50638	14.6368	0.633663
ENSMUSG00000003452	Bicd1	7.76124	7.8365	7.79775	7.46502	7.82588	7.8401	7.77676	7.48123	7.71748	7.7119	7.66023	7.54074	7.87235	7.61657	7.6935	7.69279	7.68195	7.53076	8.28237	8.31203	8.23988	8.32948	8.25836	8.43745	8.41079	8.39765	8.28752	8.30173	8.49781	8.5864	8.3536	8.44876	8.24647	8.28857	7.7985	7.71033	7.65849	7.63762	7.74446	7.68941	8.2781	8.34176	8.36532	8.46198	8.40118	8.26752	214.283	-0.121637
ENSMUSG00000003458	Ncstn	8.85524	8.79741	8.81735	8.60713	8.82522	8.84715	8.71636	8.7939	8.65156	8.80206	8.80801	8.73697	8.60643	8.57814	8.49335	8.50573	8.56467	8.39569	9.42063	9.36539	9.45186	9.32767	9.48047	9.30227	9.56962	9.50801	9.61835	9.60146	9.53807	9.52253	9.34421	9.47086	9.42433	9.34758	8.82333	8.75983	8.72061	8.78235	8.59229	8.52125	9.41263	9.37014	9.56533	9.55402	9.40753	9.38596	442.286	-0.0772873
ENSMUSG00000003464	Pex19	7.87264	7.96918	7.8977	7.77651	7.94857	7.78118	7.69629	7.9654	7.79564	7.83123	7.86316	7.86926	7.71223	7.77069	7.64094	7.68288	7.81523	7.75918	8.51957	8.45619	8.54782	8.53164	8.58201	8.47255	8.50444	8.60243	8.57359	8.62845	8.54309	8.55311	8.55577	8.58832	8.72699	8.62866	7.91317	7.83542	7.81911	7.85455	7.74146	7.71301	8.50786	8.52873	8.56015	8.57488	8.57204	8.67783	234.133	-0.132592
ENSMUSG00000003469	Phyhip	11.0993	11.1659	11.1095	10.8965	11.0759	11.0325	10.9744	11.0591	10.9349	10.9862	10.9471	11.0592	10.7556	10.8495	10.893	10.9228	10.8584	10.95	11.5741	11.4154	11.5525	11.3833	11.4298	11.451	11.6823	11.6624	11.7907	11.5745	11.6061	11.6654	11.5266	11.6162	11.5272	11.4303	11.1249	11.0016	10.9895	10.9975	10.8025	10.8914	11.514	11.4214	11.7118	11.6153	11.5714	11.4788	2144.15	-0.167019
ENSMUSG00000003500	Impdh1	7.95264	7.98702	7.89652	7.6841	7.88417	7.82624	7.77576	8.03974	7.9966	7.77749	7.79857	7.93542	7.90575	7.77849	7.97944	7.91333	7.88303	8.12573	8.55746	8.61217	8.54089	8.49211	8.65408	8.45622	8.59674	8.57575	8.60223	8.6663	8.54087	8.59739	8.69054	8.62865	8.64415	8.59982	7.94539	7.79817	7.93737	7.83716	7.84212	7.92527	8.57017	8.53413	8.59157	8.60152	8.6596	8.62199	233.058	-0.253911
ENSMUSG00000003518	Dusp3	8.86067	8.80036	8.75373	8.80754	8.79756	8.81692	8.72848	9.05556	8.55902	8.63944	8.74499	8.56712	8.4663	8.6868	8.79244	8.76537	8.69746	8.79946	9.40675	9.35839	9.38687	9.49843	9.4484	9.28394	9.3652	9.53795	9.48617	9.50754	9.52035	9.46059	9.44716	9.46654	9.49001	9.48112	8.80492	8.80734	8.78102	8.65052	8.57655	8.75176	9.384	9.41026	9.46311	9.49616	9.45685	9.48556	447.754	0.00102831
ENSMUSG00000003526	Prodh	3.28344	3.22245	3.23595	3.24719	3.24253	3.17308	3.40101	3.40229	3.30451	3.20577	3.25994	3.4454	2.57958	2.54126	2.59725	2.56545	2.5161	2.57635	3.15808	3.17475	3.13856	3.15229	3.13933	3.10854	3.67149	3.63406	3.73459	3.74643	3.68359	3.67318	4.48069	4.41125	4.58708	4.53905	3.24728	3.22093	3.36927	3.3037	2.56042	2.5596	3.15713	3.13339	3.68005	3.70106	4.44597	4.56307	9.64412	-0.382401
ENSMUSG00000003527	Ess2	6.04657	6.01313	5.99722	6.00641	5.98575	5.95823	5.93411	6.01606	6.04951	6.02113	5.99146	6.11329	5.78433	5.77469	5.75882	5.79018	5.77059	5.82421	6.69668	6.67188	6.72042	6.66964	6.60902	6.71662	6.66625	6.7258	6.78942	6.8246	6.75585	6.68913	6.88658	6.8647	6.95808	6.91484	6.01897	5.98346	5.9999	6.04196	5.77951	5.7732	6.69633	6.66509	6.72716	6.75653	6.87564	6.93646	64.1616	-0.123013
ENSMUSG00000003528	Slc25a1	5.60871	5.57088	5.55869	5.48682	5.58068	5.49946	5.38847	5.50931	5.34136	5.41514	5.3447	5.42467	5.48197	5.37288	5.41241	5.34527	5.34177	5.49577	5.99639	5.99381	6.00392	6.08171	6.00684	6.1396	6.32739	6.29113	6.31002	6.35305	6.36008	6.43135	6.36937	6.32329	6.38633	6.39885	5.57943	5.52232	5.41305	5.39484	5.42743	5.36648	5.99804	6.07605	6.30952	6.3815	6.34633	6.39259	46.1674	-0.210495
ENSMUSG00000003531	Dgcr6	5.81681	5.76444	5.7982	5.97615	5.77048	5.84734	5.6579	5.95607	5.61865	5.78552	5.63001	5.90583	5.68494	5.59446	5.70711	5.62784	5.5411	5.62804	6.21386	6.3662	6.33188	6.28401	6.27443	6.26592	6.10128	6.18913	6.26391	6.30327	6.18606	6.03323	6.35277	6.35389	6.3307	6.37471	5.79315	5.86466	5.74421	5.77379	5.6397	5.62535	6.30398	6.27479	6.18478	6.17419	6.35333	6.35271	59.0496	0.227092
ENSMUSG00000003534	Ddr1	6.46613	6.48067	6.47015	6.33384	6.46613	6.47439	6.35773	6.68513	6.52175	6.39751	6.43254	6.3968	6.11581	6.24512	6.26281	6.18409	6.14354	6.16236	7.1446	7.03011	7.03854	6.98317	7.03963	7.06654	7.16965	7.07769	7.26955	7.29804	7.2026	7.16519	7.26504	7.30189	7.43406	7.52969	6.47232	6.42479	6.52153	6.40895	6.18047	6.19681	7.07108	7.02978	7.1723	7.22194	7.28346	7.48188	86.0556	-0.102754
ENSMUSG00000003541	Ier3	4.62908	4.59621	4.64174	4.5062	4.62617	4.61509	4.54697	4.58469	4.47369	4.53423	4.58907	4.59087	4.57803	4.64112	4.63838	4.57983	4.79079	4.7726	4.92079	4.87333	4.90153	4.91487	4.9495	4.88507	5.54016	5.5564	5.56647	5.52062	5.45623	5.59724	5.30544	5.38627	5.33942	5.27739	4.62234	4.58248	4.53511	4.57139	4.60958	4.66967	4.89855	4.91648	5.55434	5.52469	5.34586	5.3084	23.2136	-0.219996
ENSMUSG00000003545	Fosb	5.07786	5.01631	5.02201	4.9719	5.14678	5.06026	5.44964	5.65761	5.86995	5.41843	5.55864	5.98125	4.85514	4.80922	4.85625	4.79245	4.92292	5.0006	5.19248	5.18797	5.27899	5.19068	5.16462	5.21389	5.87104	5.76638	5.90199	5.8136	6.03233	5.94378	6.13327	6.23589	6.01234	6.13311	5.03873	5.05965	5.65907	5.65278	4.83218	4.85721	5.21981	5.18973	5.84647	5.9299	6.18458	6.07272	32.2196	0.133208
ENSMUSG00000003546	Klc4	5.61975	5.62021	5.50198	5.70705	5.42187	5.36249	5.48366	5.35455	5.30421	5.27561	5.25846	5.31561	5.16348	5.12106	5.2245	5.24321	5.16769	5.28793	5.97058	5.93864	5.95556	5.94199	5.91683	5.98466	6.03368	6.07556	6.11155	6.05845	6.05224	6.04987	6.50393	6.40219	6.44005	6.40142	5.58065	5.49714	5.38081	5.28323	5.14227	5.2118	5.95493	5.94782	6.0736	6.05352	6.45306	6.42074	49.4117	-0.320591
ENSMUSG00000003549	Ercc1	5.90248	5.85494	5.84334	5.78658	5.78127	5.88722	5.88073	5.79389	5.73063	5.86172	5.82841	6.03881	5.67323	5.62016	5.74686	5.70804	5.66964	5.79243	6.45221	6.46711	6.45706	6.41735	6.42083	6.33569	6.85752	6.78845	6.99539	6.78501	6.81589	6.6924	6.57488	6.71513	6.65093	6.72121	5.86692	5.81835	5.80175	5.90965	5.6467	5.70818	6.45879	6.39129	6.88045	6.76443	6.645	6.68607	56.7694	-0.154867
ENSMUSG00000003559	As3mt	2.71225	2.72014	2.67059	2.64785	2.6536	2.72297	2.39449	2.43416	2.47919	2.4527	2.45622	2.37489	1.77591	1.82751	1.7986	1.78315	1.83385	1.79239	3.28506	3.34071	3.27457	3.28685	3.29486	3.28559	3.48552	3.53528	3.45736	3.52175	3.44996	3.54143	3.77917	3.74522	3.84511	3.79831	2.70099	2.67481	2.43595	2.42794	1.80171	1.8052	3.30011	3.2891	3.49272	3.50438	3.76219	3.82171	5.90554	-0.511583
ENSMUSG00000003573	Homer3	NA	NA	NA	NA	NA	NA	NA	NA	NA	NA	NA	NA	NA	NA	NA	NA	NA	NA	1.94486	1.91219	1.94643	1.94203	1.90051	1.93436	1.84191	1.84567	1.84649	1.87809	1.86655	1.87966	2.4078	2.41645	2.42435	2.41836	NA	NA	NA	NA	NA	NA	1.93449	1.92563	1.84469	1.87476	2.41212	2.42135	NA	NA
ENSMUSG00000003575	Crtc1	8.76755	8.61689	8.52261	8.44947	8.59971	8.34505	8.45273	8.63513	8.48315	8.30532	8.28872	8.35849	8.1477	8.45423	8.47701	8.42483	8.43676	8.54103	9.09714	9.10293	9.08883	9.07901	9.23347	9.02432	9.02784	9.13645	9.10936	9.23161	9.12309	9.05287	9.19348	9.16305	9.35013	9.36743	8.63568	8.46474	8.52367	8.31751	8.30096	8.4462	9.0963	9.11227	9.09121	9.13586	9.17827	9.35878	376.968	-0.287848
ENSMUSG00000003581	Rnf215	5.15827	5.25924	5.21033	5.61649	5.09991	5.16256	4.68462	4.74707	5.01509	4.7335	4.71935	4.60214	4.59602	4.66023	4.6281	4.63465	4.62965	4.5937	5.42459	5.38124	5.54363	5.37293	5.37909	5.34896	5.68341	5.57402	5.70744	5.77024	5.72831	5.69781	5.65067	5.67558	5.70181	5.63621	5.20928	5.29299	4.81559	4.68499	4.62812	4.6308	5.44982	5.367	5.65496	5.73212	5.66312	5.66901	44.3374	0.491977
ENSMUSG00000003585	Sec14l2	7.31291	7.21111	7.19537	7.14078	7.19631	7.1381	6.94103	7.17127	7.11957	6.93113	7.05653	7.07697	6.96864	6.84289	6.9652	6.90469	6.97179	6.80339	7.84752	7.78542	7.75056	7.80585	7.77855	7.82627	7.88609	7.93907	7.84148	7.95158	7.90083	7.88266	7.9131	7.89006	7.98325	8.1453	7.2398	7.1584	7.07729	7.02155	6.90576	6.94723	7.7945	7.80355	7.88888	7.91169	7.90158	8.06428	146.514	-0.176966
ENSMUSG00000003604	Aven	3.95713	3.91276	3.93958	4.00641	3.90002	3.90585	4.07627	4.24625	4.12415	4.12941	4.0978	4.17044	4.23661	4.18949	4.24032	4.20286	4.16921	4.21933	5.01497	5.10549	5.02569	4.96678	5.04746	5.12208	5.0747	5.07703	5.04675	5.09712	5.10468	5.07661	4.52343	4.61056	4.5793	4.56793	3.93649	3.93743	4.14889	4.13255	4.21305	4.20413	5.04872	5.04544	5.06616	5.0928	4.56699	4.57361	16.3034	-0.0146629
ENSMUSG00000003617	Cp	3.40913	3.35986	3.34029	3.50584	3.36405	3.28754	2.8328	2.7934	2.84129	2.87736	2.80121	2.78405	2.24532	2.23427	2.24005	2.26473	2.23392	2.19034	3.84146	3.87301	3.77291	3.82455	3.81427	3.87241	4.32833	4.34595	4.30954	4.35671	4.34432	4.30581	4.73493	4.74183	4.78048	4.83691	3.36976	3.38581	2.8225	2.82087	2.23979	2.24623	3.82913	3.83708	4.32794	4.33561	4.73838	4.80869	12.1897	0.246256
ENSMUSG00000003623	Crot	5.93423	5.88803	5.97829	5.92983	5.88008	5.95548	5.9094	5.74523	5.79761	5.83042	5.85694	5.97243	5.77243	5.81692	5.82804	5.84259	5.77003	5.66816	6.48779	6.45963	6.47251	6.63878	6.51246	6.57398	6.72618	6.82642	6.71555	6.61618	6.68372	6.87201	6.68168	6.6308	6.6443	6.59254	5.93352	5.9218	5.81741	5.88659	5.79467	5.81356	6.47331	6.57507	6.75605	6.72397	6.65624	6.61842	61.0884	-0.037061
ENSMUSG00000003644	Rps6ka1	4.44114	4.5121	4.53444	4.41349	4.52731	4.57729	4.33154	4.37997	4.2797	4.27296	4.37164	4.22148	4.3756	4.3902	4.46471	4.36285	4.41867	4.53511	5.17296	5.20221	5.20144	5.1557	5.17898	5.18089	5.43391	5.53195	5.34482	5.5182	5.4179	5.46112	5.14904	5.23987	5.19919	5.18801	4.49589	4.50603	4.3304	4.28869	4.3829	4.41541	5.1922	5.17186	5.43689	5.46574	5.19445	5.1936	21.7027	0.0966418
ENSMUSG00000003657	Calb2	4.48474	4.67145	4.43823	4.53924	4.4547	4.80417	4.0486	4.19415	4.05376	3.96887	4.54694	4.03779	3.7687	3.84665	3.77231	3.77973	4.00322	3.78814	4.8736	4.89691	4.828	4.90279	4.7704	5.09125	5.00708	5.08404	5.22359	5.10757	5.16159	5.21518	5.77297	5.64996	5.66937	5.65282	4.53148	4.59937	4.09884	4.18454	3.80767	3.85175	4.86617	4.92148	5.10491	5.16145	5.71147	5.66109	23.8415	0.452471
ENSMUSG00000003660	Snrnp200	10.286	10.2011	10.1873	10.4521	10.2199	10.0923	10.0312	10.06	10.0409	9.94378	9.86863	9.82661	9.98015	10.0351	10.017	9.98114	10.0282	9.87536	10.6545	10.6745	10.6142	10.7584	10.8043	10.7783	10.7901	10.864	10.7775	10.6937	10.645	10.7869	10.9284	10.7108	10.8641	10.9183	10.2248	10.2548	10.044	9.87968	10.0076	10.0088	10.6477	10.7804	10.8105	10.7085	10.8196	10.8912	1218.67	0.0460905
ENSMUSG00000003662	Ciao1	7.0871	7.10737	6.98441	7.35114	7.02441	6.91274	6.83481	7.05801	6.94362	6.9082	6.87521	6.9239	6.50992	6.60282	6.6629	6.55425	6.56957	6.70361	7.32546	7.27328	7.51251	7.27434	7.35879	7.32663	7.57982	7.66798	7.69855	7.624	7.52817	7.68411	7.57746	7.56284	7.79097	7.72714	7.05963	7.0961	6.94548	6.90244	6.55637	6.59557	7.37041	7.31992	7.64878	7.61209	7.57015	7.75906	140.352	0.0822663
ENSMUSG00000003665	Has1	2.14098	2.10887	2.12544	2.10638	2.16771	2.15425	NA	NA	NA	NA	NA	NA	NA	NA	NA	NA	NA	NA	2.21783	2.251	2.27406	2.25712	2.21957	2.23297	2.58552	2.59388	2.63304	2.5611	2.57536	2.60118	2.64062	2.64375	2.65606	2.65658	2.12509	2.14278	NA	NA	NA	NA	2.24763	2.23655	2.60415	2.57921	2.64218	2.65632	4.04138	0.539276
ENSMUSG00000003680	Taf6l	5.58441	5.58907	5.6125	5.69995	5.55319	5.55052	5.4097	5.65882	5.56949	5.53239	5.55811	5.41103	5.31044	5.27221	5.16075	5.4018	5.26313	5.31545	6.17267	6.23216	6.14021	6.16987	6.14953	6.22899	6.32238	6.32364	6.31997	6.39669	6.3926	6.40142	6.18288	6.20761	6.2845	6.2088	5.59533	5.60122	5.546	5.50051	5.29133	5.27523	6.18168	6.1828	6.322	6.3969	6.19524	6.24665	49.9638	0.00101176
ENSMUSG00000003721	Insig2	6.57609	6.66948	6.81453	6.79614	6.7227	6.69204	6.48805	6.33034	6.57427	6.51322	6.54369	6.49186	6.24382	6.30288	6.24012	6.30691	6.19459	6.26359	7.08388	6.91025	7.02839	7.02009	6.9231	6.93386	7.50951	7.38331	7.45779	7.34687	7.40686	7.33345	7.23139	7.34672	7.10618	7.13087	6.6867	6.73696	6.46422	6.51626	6.27335	6.24721	7.00751	6.95901	7.4502	7.36239	7.28906	7.11853	106.676	0.110846
ENSMUSG00000003731	Kpna6	8.60823	8.69318	8.59703	8.54373	8.66491	8.56694	8.40522	8.36733	8.44206	8.43393	8.32488	8.43661	8.49663	8.51662	8.6467	8.48347	8.45291	8.47875	9.00184	9.07795	8.98892	9.0774	9.12242	9.13818	9.17546	9.39619	9.15628	9.10939	9.14166	9.3553	9.27519	9.15461	9.27135	9.18455	8.63281	8.59186	8.40487	8.39847	8.50663	8.52769	9.0229	9.11266	9.24264	9.20211	9.2149	9.22795	390.952	-0.0619482
ENSMUSG00000003746	Man1a	7.461	7.59563	7.59549	7.53536	7.65653	7.64869	7.46022	7.21138	7.21346	7.40734	7.36314	7.24761	7.53381	7.60745	7.57799	7.72555	7.58351	7.57489	8.19036	8.11736	8.2364	8.13314	8.18799	8.15424	8.34339	8.21201	8.3654	8.28205	8.19034	8.19137	8.10024	8.20076	8.01165	8.05649	7.55071	7.61353	7.29502	7.33936	7.57063	7.62901	8.18137	8.15846	8.30693	8.22126	8.1505	8.03407	191.55	0.139482
ENSMUSG00000003752	Itpkc	4.64447	4.55571	4.54217	4.53565	4.50147	4.58833	4.1729	4.40884	4.51075	4.15869	4.21969	4.30715	4.30443	4.33107	4.34683	4.33416	4.43782	4.41331	4.9891	4.93578	4.92656	4.96393	4.99	4.92003	5.05065	5.10658	5.18105	5.08697	5.21148	5.21477	5.39589	5.39462	5.43948	5.43075	4.58078	4.54182	4.36416	4.22851	4.31775	4.37294	4.95048	4.95798	5.11276	5.17107	5.39526	5.43512	23.3291	-0.249641
ENSMUSG00000003762	Coq8b	4.82082	4.75498	4.72799	4.74308	4.66586	4.7439	4.2345	4.29535	4.34157	4.25927	4.29215	4.18468	4.67837	4.58279	4.63438	4.64953	4.60671	4.69595	5.33027	5.3262	5.34961	5.34816	5.28982	5.32014	5.49249	5.45909	5.50313	5.45955	5.60103	5.45026	5.59477	5.59358	5.58949	5.64053	4.76793	4.71762	4.29047	4.24537	4.63058	4.63021	5.33536	5.31937	5.4849	5.50362	5.59417	5.61501	26.841	-0.305133
ENSMUSG00000003778	Brd8	8.3514	8.41369	8.35411	8.57365	8.33619	8.36543	8.13743	8.15082	8.10956	8.09609	8.25285	7.97246	8.1643	8.19142	8.21969	8.10301	8.15013	8.23956	8.96833	8.90855	8.84702	8.80912	8.90922	8.93221	8.9594	8.93368	9.06534	8.96647	8.95371	8.98128	8.94645	8.74159	8.82858	8.95092	8.37307	8.42509	8.1326	8.10714	8.17786	8.15761	8.90797	8.88352	8.98614	8.96715	8.84402	8.88975	341.004	0.0740015
ENSMUSG00000003808	Farsa	6.35451	6.26531	6.1922	6.30621	6.22314	6.31561	6.18276	6.29771	6.32247	6.27078	6.26551	5.98318	6.08153	6.0818	6.02946	6.07692	6.01026	6.1367	6.96358	6.8898	6.98379	6.94838	6.95032	6.93771	6.86255	7.01061	7.0537	7.00743	6.95389	6.98472	6.98779	7.09705	7.12236	7.16977	6.27067	6.28166	6.26765	6.17316	6.08166	6.03888	6.94572	6.94547	6.97562	6.98201	7.04242	7.14606	77.936	0.0184266
ENSMUSG00000003809	Gcdh	5.58686	5.54876	5.44531	5.43491	5.50492	5.55864	5.55686	5.77487	5.58947	5.62354	5.46255	5.51345	5.6862	5.53218	5.6268	5.57436	5.59757	5.69085	6.17733	6.13635	6.111	6.10886	6.2142	6.07582	6.18217	6.25012	6.12135	6.32592	6.2896	6.18261	6.46964	6.44136	6.42991	6.39013	5.52698	5.49949	5.6404	5.53318	5.60919	5.59958	6.14156	6.13296	6.18455	6.26604	6.4555	6.41002	44.6707	-0.0984538
ENSMUSG00000003810	Mast2	7.44446	7.41342	7.38579	7.56919	7.48261	7.17093	7.02526	6.84783	7.07822	6.92882	6.89229	6.97643	7.46057	7.45478	7.2006	7.43415	7.23875	7.36591	7.69218	7.966	7.8267	7.99736	8.17069	7.89293	8.10788	8.01188	7.72124	7.96447	7.8785	7.94914	8.00293	7.88277	8.0198	8.04887	7.41456	7.40758	6.98377	6.93251	7.45768	7.29117	7.82829	8.02033	7.947	7.9307	7.94285	8.03433	173.826	-0.00958788
ENSMUSG00000003812	Dnase2a	NA	NA	NA	NA	NA	NA	NA	NA	NA	NA	NA	NA	NA	NA	NA	NA	NA	NA	NA	NA	NA	NA	NA	NA	1.9138	1.92797	1.93875	1.94122	1.91278	1.91229	2.56427	2.58388	2.62388	2.60977	NA	NA	NA	NA	NA	NA	NA	NA	1.92684	1.9221	2.57407	2.61682	NA	NA
ENSMUSG00000003813	Rad23a	7.93902	7.93291	7.954	7.98739	7.88699	7.92954	7.69237	8.00642	7.71803	7.75716	7.82174	7.74834	7.6376	7.64804	7.6936	7.67629	7.65791	7.81803	8.49998	8.46673	8.55151	8.5254	8.48328	8.34358	8.4884	8.43728	8.52579	8.60727	8.61709	8.48222	8.56018	8.63118	8.60374	8.70845	7.94198	7.93464	7.80561	7.77575	7.64282	7.67593	8.50607	8.45075	8.48382	8.56886	8.59568	8.6561	246.087	-0.0226057
ENSMUSG00000003814	Calr	11.4501	11.4803	11.4641	11.4871	11.5433	11.522	11.5875	11.5488	11.634	11.4466	11.4367	11.6611	11.5352	11.4903	11.2781	11.5486	11.4242	11.2253	12.2907	12.1086	12.1226	12.2023	12.2508	12.1445	12.5659	12.5854	12.4182	12.351	12.347	12.402	12.3624	12.493	12.2385	12.1366	11.4649	11.5174	11.5901	11.5148	11.5127	11.417	12.174	12.1992	12.5232	12.3667	12.4277	12.1876	2879.78	0.0758149
ENSMUSG00000003847	Nfat5	8.80137	8.89462	8.81476	8.78903	8.8472	8.88665	8.73076	8.40003	8.74385	8.72333	8.63544	8.83478	8.73729	8.7728	8.67982	8.64026	8.74759	8.52716	9.39252	9.28256	9.38224	9.38595	9.36251	9.39227	9.57562	9.48805	9.54532	9.41391	9.52341	9.53067	9.47395	9.52782	9.31656	9.377	8.83692	8.84096	8.62488	8.73118	8.75504	8.68922	9.35244	9.38024	9.53633	9.48933	9.50088	9.34678	457.561	0.0132504
ENSMUSG00000003848	Nob1	6.83781	6.82021	6.91833	7.13819	6.78882	6.88121	6.7064	6.39363	6.70982	6.5791	6.5564	6.59417	6.33886	6.34358	6.41446	6.43582	6.54932	6.42024	7.28797	7.29818	7.28564	7.25284	7.17854	7.25695	7.19392	7.24292	7.33121	7.2753	7.24098	7.28435	7.24349	7.29667	7.29517	7.29939	6.85878	6.93607	6.60328	6.57655	6.34122	6.46653	7.2906	7.22944	7.25602	7.26688	7.27008	7.29728	123.654	0.173471
ENSMUSG00000003849	Nqo1	2.89311	2.84617	2.84487	2.80023	2.85364	2.83113	2.70852	2.66392	2.73344	2.63387	2.69238	2.78071	2.58668	2.6004	2.56789	2.56618	2.57251	2.62065	3.37786	3.40217	3.39293	3.37203	3.39226	3.36403	3.43506	3.43985	3.46965	3.45474	3.48649	3.43181	3.84392	3.8891	3.8417	3.86882	2.86138	2.82833	2.70196	2.70232	2.59354	2.56886	3.39099	3.3761	3.44819	3.45768	3.86651	3.85526	6.63481	-0.591015
ENSMUSG00000003863	Ppfia3	9.34998	9.22528	9.24521	9.21382	9.24981	9.29962	9.12368	9.32559	9.13914	9.09826	8.98672	8.99996	9.19133	8.9899	9.09676	9.06027	9.10994	9.26144	9.77356	9.84753	9.8121	9.85437	9.74177	9.75344	9.71063	9.70227	9.76356	9.76351	9.69441	9.68064	9.83883	9.69426	9.90687	9.93351	9.27349	9.25442	9.19614	9.02831	9.09062	9.08899	9.81106	9.78319	9.72548	9.71285	9.76655	9.92019	614.761	-0.0262023
ENSMUSG00000003865	Gys1	4.75358	4.73467	4.7476	4.59739	4.69508	4.69126	4.75195	4.77939	4.90113	4.68049	4.6819	4.86755	4.52633	4.52094	4.70121	4.59684	4.58387	4.62499	5.43606	5.53088	5.56365	5.55215	5.50467	5.4683	5.67738	5.67579	5.71261	5.71896	5.69527	5.77195	5.66521	5.6806	5.61051	5.73182	4.74528	4.66124	4.81082	4.74331	4.52364	4.6273	5.51019	5.50837	5.68859	5.72873	5.67291	5.67116	24.8815	-0.477934
ENSMUSG00000003868	Ruvbl2	6.54653	6.63697	6.636	6.55032	6.59583	6.66097	6.31608	6.40354	6.39541	6.43429	6.39405	6.55392	6.36094	6.30121	6.35172	6.35528	6.29215	6.43997	6.90921	7.00703	7.08387	6.96819	6.94485	6.97919	7.10883	7.13912	7.21394	7.12533	7.15081	7.16819	7.23411	7.27041	7.26654	7.30526	6.6065	6.60237	6.37168	6.46075	6.33107	6.33305	7.00004	6.96408	7.15396	7.14811	7.25226	7.2859	96.7887	0.00391487
ENSMUSG00000003872	Lin7b	8.10691	8.04761	8.15919	8.04143	7.98279	8.20118	7.83812	8.10215	8.01526	7.97288	7.91321	7.97702	7.5721	7.65533	7.73819	7.73926	7.77015	7.97426	8.37785	8.39651	8.64171	8.43297	8.38784	8.34136	8.43689	8.41936	8.50767	8.5287	8.42716	8.50826	8.34789	8.40465	8.36711	8.33993	8.10457	8.07513	7.98518	7.95437	7.61371	7.7492	8.47202	8.38739	8.45464	8.48804	8.37627	8.35352	272.794	-0.039143
ENSMUSG00000003873	Bax	4.8256	4.87006	4.72817	4.73517	4.8235	4.7127	4.83344	5.10153	4.84453	4.68024	4.79752	4.97411	4.47071	4.48274	4.48074	4.45722	4.47036	4.53981	5.4631	5.45272	5.49707	5.44734	5.50847	5.4503	5.3617	5.35886	5.42548	5.44284	5.57564	5.48246	5.48415	5.47133	5.62319	5.49995	4.80795	4.75712	4.9265	4.81729	4.47672	4.46944	5.47096	5.4687	5.38202	5.50031	5.47774	5.56157	26.9439	-0.289933
ENSMUSG00000003923	Tfam	7.20963	7.29544	7.31387	7.02673	7.40292	7.34592	7.11395	6.87286	7.05438	7.20073	7.0993	7.03951	7.40397	7.2105	7.16387	7.15042	7.18889	7.13919	8.06831	7.80467	7.90956	7.81326	7.83175	8.01026	8.02635	7.88143	7.96463	7.86391	7.84926	7.94982	7.85074	7.97625	7.65713	7.74353	7.27298	7.25852	7.01373	7.11318	7.30724	7.16772	7.92751	7.88509	7.95747	7.88766	7.91349	7.70033	152.3	0.0172517
ENSMUSG00000003929	Zfp81	5.78824	5.76452	5.90354	5.72265	5.8888	5.80337	5.49312	5.15801	5.21167	5.45028	5.36366	5.46476	5.89581	5.89868	5.72262	5.80312	5.81647	5.75155	6.28056	6.41349	6.30443	6.45302	6.44732	6.5574	6.50057	6.58817	6.45542	6.36521	6.42022	6.55401	6.46675	6.5095	6.4432	6.40293	5.81877	5.80494	5.2876	5.42624	5.89725	5.78074	6.33283	6.48591	6.51472	6.44648	6.48812	6.42307	55.479	-0.0225844
ENSMUSG00000003934	Efnb3	5.50667	5.51473	5.36899	5.28743	5.41848	5.38061	5.26587	5.41409	5.3929	5.2618	5.64165	5.45099	5.14449	5.19736	5.12549	5.16874	5.20103	5.23589	5.97458	5.8753	5.92062	5.77407	5.77784	5.8615	6.26366	6.28686	6.51303	6.4774	6.37655	6.21783	6.51174	6.54635	6.46936	6.51593	5.46346	5.36217	5.35762	5.45148	5.17093	5.16509	5.9235	5.80447	6.35452	6.35726	6.52905	6.49264	41.1897	-0.413232
ENSMUSG00000003948	Mmd	5.77217	5.80749	6.05051	5.90727	5.88496	5.83627	5.86206	5.63891	5.68433	5.84497	5.69872	5.64776	5.78881	5.91715	5.90634	5.86381	5.84414	5.8517	6.48231	6.45995	6.69052	6.36152	6.54181	6.47564	6.75778	6.7286	6.82825	6.62549	6.66934	6.73665	6.57478	6.6104	6.48511	6.4798	5.87672	5.87616	5.72843	5.73048	5.85298	5.87143	6.54426	6.45966	6.77155	6.67716	6.59259	6.48245	60.0573	-0.0213481
ENSMUSG00000003949	Hlf	9.52675	9.46893	9.4784	9.59446	9.46325	9.49118	9.23594	9.42969	9.40518	9.22065	9.26568	9.48939	9.29754	9.00504	9.24184	9.23068	9.23057	9.14426	9.94685	9.86065	9.9259	9.84148	9.93322	9.93226	9.9197	9.9076	10.0354	10.0512	10.1146	9.96315	10.0489	9.98289	10.1172	10.1865	9.49136	9.5163	9.35694	9.32524	9.15129	9.23436	9.91113	9.90232	9.95422	10.043	10.0159	10.1519	727.866	0.0301412
ENSMUSG00000003955	Fam162a	7.13788	7.14188	7.01589	7.13056	7.09968	7.20348	6.76065	6.99495	6.98533	6.99552	6.96676	6.95111	7.08837	6.96583	7.04841	6.99274	6.9799	6.98282	7.70076	7.66623	7.56693	7.66091	7.64176	7.64616	7.62319	7.77655	7.58543	7.71975	7.7257	7.78677	7.90866	7.84959	7.9292	7.91264	7.09855	7.14458	6.91364	6.97113	7.0271	7.00702	7.64464	7.64961	7.66172	7.74408	7.87913	7.92092	139.434	0.0995169
ENSMUSG00000003970	Rpl8	9.02729	9.13473	9.00321	9.05105	9.05076	9.07127	9.01588	9.13628	9.12995	9.04808	8.99127	9.38019	8.82491	8.9323	8.92882	8.84483	8.96176	9.06445	9.57742	9.56432	9.61291	9.53037	9.55032	9.45951	9.74895	9.87714	9.94049	9.81403	9.84847	9.82832	9.60209	9.80545	9.67554	9.63406	9.05508	9.05769	9.09404	9.13984	8.87861	8.9118	9.58488	9.5134	9.85553	9.83027	9.70377	9.6548	532.636	0.000913646
ENSMUSG00000003974	Grm3	9.77806	9.74057	9.80514	9.86633	9.87864	9.92436	9.71089	9.33319	9.49266	9.73616	9.5577	9.57237	9.63203	9.5959	9.63409	9.65897	9.76084	9.59195	10.3354	10.3853	10.4814	10.3592	10.4514	10.3146	10.467	10.3197	10.3606	10.3414	10.2702	10.4028	10.1645	10.2409	10.0566	10.0694	9.77459	9.88977	9.51225	9.62208	9.61396	9.68464	10.4007	10.3751	10.3824	10.3382	10.2027	10.063	913.631	0.176183
ENSMUSG00000003992	Ssbp2	8.40328	8.38	8.42922	7.8556	8.30817	8.26739	8.24711	8.10109	8.13051	8.22542	8.25156	8.09916	8.33477	8.30356	8.34411	8.251	8.32089	8.22057	9.0391	8.93735	8.90475	8.99806	8.9033	9.05265	9.12743	9.14768	9.19607	9.15569	9.12686	9.09964	9.05305	9.00665	8.96463	8.93184	8.40417	8.14372	8.15957	8.19205	8.31917	8.30533	8.9604	8.98467	9.15706	9.1274	9.02985	8.94823	310.177	-0.407524
ENSMUSG00000004018	Fancl	4.56958	4.63313	4.63077	4.6725	4.68708	4.64631	4.84884	4.63846	4.81662	4.81313	4.76298	4.67379	4.5128	4.69676	4.59795	4.61335	4.71428	4.70236	5.33021	5.39261	5.44754	5.38067	5.30787	5.43669	5.63301	5.61374	5.65046	5.63914	5.56905	5.61878	5.42821	5.42984	5.43627	5.47172	4.61116	4.66863	4.76797	4.74997	4.60478	4.64186	5.39012	5.37508	5.6324	5.60899	5.42903	5.454	25.4108	0.343597
ENSMUSG00000004031	Brinp2	8.36948	8.33374	8.32769	8.29614	8.33678	8.31405	8.15145	8.41347	8.40784	8.1994	8.19851	8.22515	8.14983	8.08086	8.27138	8.20615	8.12221	8.2498	8.93086	9.02871	8.90672	8.95765	9.00962	8.90537	8.86973	8.89233	8.86345	9.07633	9.0485	8.93001	9.03523	8.96142	9.06293	9.14487	8.34364	8.31566	8.32425	8.20769	8.11534	8.19991	8.95543	8.95755	8.87517	9.01828	8.99833	9.1039	321.361	-0.045582
ENSMUSG00000004032	Gstm5	8.61584	8.66911	8.72387	8.65592	8.53895	8.6631	8.63876	8.51218	8.62813	8.55878	8.68799	8.61832	8.42088	8.44765	8.53931	8.50227	8.41446	8.41064	9.06701	9.05965	9.13054	9.14902	9.10854	9.16773	9.24661	9.42881	9.31764	9.26503	9.26826	9.37158	9.34385	9.34104	9.49014	9.49956	8.66961	8.61932	8.59302	8.6217	8.43426	8.48535	9.08573	9.14176	9.33102	9.30163	9.34244	9.49485	401.116	-0.0866491
ENSMUSG00000004035	Gstm7	4.23836	4.34254	4.28277	4.25094	4.27337	4.40754	4.30209	4.32391	4.16439	4.41631	4.41821	4.29592	4.53377	4.52454	4.43111	4.48344	4.48555	4.41618	4.94888	5.02166	5.01088	5.05311	5.04559	4.99455	5.18476	5.1691	5.13177	5.11984	5.24342	5.23983	5.43693	5.39899	5.55186	5.44297	4.28789	4.31062	4.26346	4.37681	4.52915	4.4667	4.99381	5.03108	5.16188	5.20103	5.41796	5.49741	19.1495	0.189794
ENSMUSG00000004040	Stat3	7.43015	7.38541	7.47892	7.36449	7.41748	7.47042	7.45797	7.32871	7.41158	7.39449	7.39007	7.57818	7.32618	7.27105	7.2262	7.38933	7.3273	7.38151	8.04071	8.04836	8.01479	7.93189	8.0314	8.04799	8.35804	8.44291	8.38217	8.29196	8.35288	8.34678	8.28201	8.22714	8.43575	8.48138	7.4315	7.41746	7.39942	7.45425	7.29862	7.31428	8.03462	8.00376	8.39437	8.33054	8.25457	8.45856	171.31	-0.014132
ENSMUSG00000004044	Cavin1	4.71762	4.66003	4.64247	4.7959	4.66949	4.60536	4.44886	4.69498	4.54586	4.54383	4.4685	4.55093	4.59795	4.51994	4.51362	4.51947	4.47387	4.50466	5.4108	5.42655	5.4022	5.37695	5.44551	5.52239	5.53241	5.6122	5.62288	5.62182	5.51005	5.46438	5.53312	5.56601	5.56672	5.62228	4.67337	4.69025	4.56323	4.52109	4.55895	4.50232	5.41318	5.44828	5.58916	5.53208	5.54956	5.5945	27.2781	0.0814897
ENSMUSG00000004054	Map3k11	3.25258	3.2031	3.231	3.26882	3.28073	3.30404	3.70315	3.77743	3.67337	3.65786	3.6672	3.66605	3.89698	3.8207	3.90464	3.79063	3.83914	3.87893	4.29941	4.37597	4.39097	4.36587	4.39132	4.343	4.52218	4.48537	4.55624	4.54346	4.55814	4.54915	4.44265	4.38667	4.40029	4.43189	3.22889	3.28453	3.71799	3.6637	3.85884	3.8448	4.35545	4.36673	4.52126	4.55025	4.41466	4.41609	9.72556	0.759813
ENSMUSG00000004056	Akt2	5.58806	5.60188	5.49364	5.4152	5.60039	5.5319	5.79901	6.03091	5.67927	5.6784	5.66476	5.80472	5.74746	5.72952	5.68606	5.74502	5.79503	5.89273	6.58504	6.52317	6.54759	6.5064	6.62688	6.47995	6.54248	6.51809	6.62526	6.60948	6.65492	6.50711	6.10908	6.26551	6.13687	6.18008	5.5612	5.51583	5.83639	5.71596	5.73849	5.74204	6.55193	6.53774	6.56194	6.5905	6.18729	6.15848	45.012	-0.153959
ENSMUSG00000004069	Dnaja3	7.88326	7.84644	7.75272	7.94804	7.83252	7.83775	7.5578	7.59047	7.68043	7.5735	7.65094	7.46863	7.76098	7.79663	7.7162	7.74724	7.65194	7.76827	8.49353	8.50684	8.48406	8.47433	8.51394	8.52562	8.52511	8.4729	8.49912	8.49075	8.47949	8.52402	8.51699	8.45037	8.51404	8.5021	7.82748	7.87277	7.60957	7.56436	7.7788	7.70513	8.49481	8.50463	8.49905	8.49809	8.48368	8.50807	232.287	0.0675349
ENSMUSG00000004070	Hmox2	8.77987	8.77417	8.844	8.65914	8.80724	8.87206	8.72345	8.69636	8.64481	8.66227	8.69681	8.61303	8.68162	8.69986	8.58857	8.63776	8.59027	8.6244	9.35524	9.35412	9.36177	9.42707	9.24399	9.37677	9.53593	9.53626	9.48626	9.44757	9.49226	9.5039	9.46142	9.54579	9.55673	9.42836	8.79934	8.77948	8.68821	8.65737	8.69074	8.60554	9.35704	9.34927	9.51948	9.48124	9.5036	9.49254	441.86	-0.0101589
ENSMUSG00000004071	Cdip1	9.87687	9.87981	9.90452	9.82727	9.82839	9.76888	9.87988	9.90019	9.73609	9.80902	9.78153	9.86435	9.31969	9.64764	9.61672	9.60341	9.67559	9.79869	10.5397	10.321	10.3961	10.299	10.3316	10.1405	10.5854	10.4965	10.7362	10.5523	10.6373	10.5155	10.4574	10.6123	10.5784	10.5082	9.88707	9.80818	9.83872	9.8183	9.48367	9.63191	10.419	10.257	10.606	10.5684	10.5348	10.5433	922.051	-0.119808
ENSMUSG00000004085	Map3k20	3.27327	3.28475	3.30993	3.24854	3.2132	3.2332	2.96925	2.96145	3.01187	3.03458	3.04049	3.03281	3.18734	3.18718	3.25074	3.20298	3.26148	3.1706	4.34663	4.26006	4.25039	4.3115	4.23341	4.24939	4.21629	4.21774	4.15467	4.2072	4.23216	4.1574	4.11384	4.14305	4.12372	4.14295	3.28932	3.23165	2.98086	3.03596	3.18726	3.2384	4.28569	4.26477	4.19623	4.19892	4.12844	4.13333	9.56418	-0.835803
ENSMUSG00000004096	Cwc15	8.06697	8.03687	8.16685	8.14533	7.99065	8.14573	7.98871	7.67917	7.96399	7.98416	7.89714	7.95775	8.18915	7.95689	7.98903	7.97572	7.99193	7.91515	8.68387	8.64128	8.60629	8.65888	8.5183	8.76534	8.87444	8.81103	8.68555	8.79661	8.83718	8.80307	8.69063	8.74424	8.55613	8.63247	8.09023	8.0939	7.87729	7.94635	8.07302	7.98556	8.64381	8.64751	8.79034	8.81228	8.71743	8.5943	274.365	0.003505
ENSMUSG00000004099	Dnmt1	8.32337	8.36794	8.25862	8.36469	8.28873	8.29398	8.07267	8.20432	8.15735	8.10371	8.02219	8.11449	8.1956	8.1951	8.11173	8.13653	8.2215	8.21856	8.90513	8.9992	8.77299	8.97784	9.05308	9.00459	8.93264	8.89341	8.91354	8.95581	8.92855	8.95619	8.96051	8.85064	8.89445	8.97119	8.31664	8.3158	8.14478	8.08013	8.19535	8.15658	8.89244	9.01184	8.9132	8.94685	8.90558	8.93282	319.509	-0.0136572
ENSMUSG00000004100	Ppan	5.35117	5.34248	5.31257	5.20323	5.2556	5.27665	5.39428	5.62048	5.41101	5.27514	5.34369	5.43151	5.1444	5.18644	5.19476	5.2015	5.18772	5.24806	6.02179	5.92027	5.89702	5.96844	5.98836	5.91146	5.66553	5.67468	5.64991	5.88484	5.7575	5.71499	6.06605	6.11513	6.05479	6.07116	5.33541	5.24516	5.47526	5.35011	5.16542	5.19466	5.94636	5.95609	5.66337	5.78578	6.09059	6.06298	38.16	-0.384614
ENSMUSG00000004110	Cacna1e	10.8821	10.7118	10.6616	10.7649	10.8404	10.7288	10.4365	10.6798	10.4862	10.4728	10.5552	10.4238	10.3307	10.4032	10.3605	10.3563	10.3733	10.3228	11.2483	11.1763	11.1578	11.1723	11.3531	11.1834	11.3865	11.2586	11.3839	11.4319	11.3294	11.2337	11.2938	11.3309	11.1896	11.3012	10.7518	10.778	10.5342	10.4839	10.367	10.3634	11.1941	11.2363	11.343	11.3317	11.3124	11.2454	1744.3	0.0332717
ENSMUSG00000004113	Cacna1b	9.22249	9.10445	9.03792	8.9074	9.15615	9.16189	8.95419	9.18315	8.95608	8.9651	8.98764	8.82548	8.77594	8.59759	8.7112	8.72251	8.71129	8.85552	9.54357	9.51991	9.52868	9.45194	9.63948	9.53218	9.73419	9.61621	9.74028	9.71068	9.60006	9.51268	9.42923	9.42911	9.45762	9.53687	9.12162	9.07514	9.03114	8.92607	8.68677	8.715	9.53072	9.5412	9.69689	9.60781	9.42917	9.49724	548.225	-0.0542181
ENSMUSG00000004127	Trmt10a	3.62176	3.68483	3.72112	3.59285	3.66515	3.73745	3.85821	3.80423	3.82802	3.7192	3.76274	3.87368	3.9944	3.93601	3.91988	3.95172	3.91122	3.9611	4.17073	4.26138	4.25671	4.17876	4.20793	4.19818	4.98356	4.91779	4.86242	4.95385	4.88358	4.84726	4.52171	4.57823	4.46439	4.48936	3.67591	3.66515	3.83015	3.7852	3.9652	3.92761	4.22961	4.19496	4.92126	4.8949	4.54997	4.47688	11.9214	-0.0986352
ENSMUSG00000004151	Etv1	6.54322	6.45339	6.44297	6.39506	6.45574	6.47804	6.59257	6.53011	6.44652	6.48741	6.44985	6.43339	6.37355	6.53111	6.50761	6.52909	6.45845	6.47536	7.24986	7.07418	7.26625	7.14406	7.07043	7.02483	7.20061	7.42328	7.54742	7.41091	7.37479	7.47629	7.27829	7.34925	7.04775	7.03903	6.47986	6.44295	6.52307	6.45688	6.45233	6.49838	7.19676	7.07977	7.39044	7.42066	7.31377	7.04339	87.362	-0.0904206
ENSMUSG00000004187	Kifc2	7.66907	7.65543	7.42905	7.41907	7.58835	7.55728	7.50674	8.02601	7.547	7.44025	7.65298	7.6438	7.63372	7.57283	7.7487	7.66738	7.61528	7.92328	8.36482	8.43867	8.44355	8.28783	8.28688	8.38374	8.24948	8.36968	8.62191	8.53142	8.49248	8.52644	8.49746	8.3294	8.47457	8.39866	7.58452	7.52156	7.69325	7.57901	7.60328	7.67712	8.41568	8.31948	8.41369	8.51678	8.41343	8.43662	186.872	-0.121281
ENSMUSG00000004207	Psap	13.9328	13.9426	13.8931	13.6749	13.9514	13.9332	13.8269	14.0305	13.8318	13.8394	13.9855	13.839	13.632	13.5941	13.6029	13.6459	13.615	13.6064	14.6163	14.4564	14.6157	14.4493	14.5679	14.4481	14.6234	14.4982	14.7674	14.7049	14.6955	14.5632	14.4904	14.6482	14.5693	14.687	13.9228	13.8531	13.8964	13.888	13.6131	13.6212	14.5628	14.4885	14.6297	14.6545	14.5693	14.6281	15214.4	-0.0855543
ENSMUSG00000004221	Ikbkg	6.99803	6.96337	6.92135	7.01307	6.85705	7.04087	6.89799	6.8531	6.81906	6.88829	6.86214	6.65463	6.74795	6.76354	6.67681	6.69406	6.74382	6.82889	7.53124	7.43742	7.55176	7.56936	7.46997	7.5397	7.58637	7.52321	7.50338	7.56491	7.55602	7.54758	7.55479	7.67075	7.6834	7.65829	6.96091	6.97033	6.85671	6.80169	6.75575	6.7049	7.50681	7.52635	7.53765	7.55617	7.61277	7.67085	125.838	0.0177817
ENSMUSG00000004233	Wars2	4.2372	4.16615	4.22848	4.31684	4.21606	4.17724	3.65202	3.69692	3.62216	3.62955	3.64546	3.54223	4.00448	3.96024	3.93553	3.94174	3.94864	3.85946	4.35429	4.40719	4.39913	4.33215	4.40903	4.4231	5.04664	5.09811	5.04632	5.07572	5.05182	5.10035	4.86465	4.89883	4.90529	4.88464	4.21061	4.23671	3.65703	3.60575	3.98236	3.94197	4.38687	4.38809	5.06369	5.07596	4.88174	4.89497	20.0514	0.178765
ENSMUSG00000004264	Phb2	7.38572	7.29605	7.10944	6.9183	7.23259	7.09749	7.20989	7.39363	7.15533	7.27248	7.28597	7.17928	7.07582	7.11217	7.1604	7.13	7.26506	7.09315	7.859	7.93321	7.81157	7.82049	7.94069	7.86047	8.01567	8.07913	8.16008	8.16232	8.10326	8.18932	8.10483	8.0751	8.20973	8.21008	7.26374	7.08279	7.25295	7.24591	7.094	7.18515	7.86792	7.87388	8.08496	8.15163	8.08996	8.20991	143.076	-0.379372
ENSMUSG00000004266	Ptpn6	NA	NA	NA	NA	NA	NA	NA	NA	NA	NA	NA	NA	NA	NA	NA	NA	NA	NA	NA	NA	NA	NA	NA	NA	2.13748	2.11688	2.10828	2.16477	2.11926	2.12122	2.82305	2.82379	2.86045	2.88999	NA	NA	NA	NA	NA	NA	NA	NA	2.12088	2.13508	2.82342	2.87522	NA	NA
ENSMUSG00000004267	Eno2	12.2285	12.1484	12.1336	12.0305	12.0597	12.142	12.0243	12.2281	11.9607	11.9571	12.0131	11.8843	11.8148	11.8588	12.0344	12.0011	11.9998	12.0777	12.7466	12.6303	12.7087	12.6677	12.69	12.6429	12.6833	12.932	12.7796	12.7927	12.7986	12.8048	12.8577	12.7589	13.0893	12.9429	12.1702	12.0774	12.0711	11.9515	11.8368	12.0118	12.6952	12.6668	12.7983	12.7987	12.8083	13.0161	4469.61	-0.127678
ENSMUSG00000004268	Emg1	5.52453	5.4302	5.47372	5.38203	5.55986	5.4798	5.35681	5.61145	5.47904	5.34772	5.55568	5.50605	5.41799	5.43641	5.4036	5.37344	5.42487	5.44435	6.3765	6.53269	6.31296	6.30275	6.40004	6.3099	6.34262	6.34256	6.33418	6.36838	6.43615	6.2131	6.48908	6.49087	6.46715	6.4092	5.47615	5.4739	5.48243	5.46982	5.4272	5.40064	6.40739	6.33756	6.33979	6.33921	6.48997	6.43818	43.4724	0.0195722
ENSMUSG00000004270	Lpcat3	4.73629	4.63509	4.71244	4.63752	4.7408	4.72779	4.66975	4.62611	4.55004	4.61047	4.64391	4.54484	4.24805	4.34807	4.30558	4.35897	4.39531	4.22932	5.43524	5.37122	5.44164	5.46316	5.41751	5.44394	5.64986	5.64227	5.57991	5.59791	5.5399	5.53557	5.40874	5.40257	5.44309	5.44327	4.69461	4.70204	4.6153	4.59974	4.29806	4.35329	5.41603	5.44154	5.62401	5.55779	5.40565	5.44318	25.3179	0.0658065
ENSMUSG00000004285	Atp6v1f	8.33905	8.50869	8.53815	8.46693	8.54412	8.53088	8.41995	8.07752	8.30583	8.51179	8.50372	8.25485	8.30236	8.51044	8.27126	8.373	8.50119	8.23948	9.16561	8.95126	8.89923	8.97224	9.05809	9.00152	9.51812	9.17828	9.42942	9.13917	9.14171	9.38851	9.09648	9.37462	8.88459	8.91918	8.46196	8.51398	8.26777	8.42345	8.4064	8.38182	9.00537	9.01062	9.37527	9.22313	9.23555	8.90189	359.774	0.0922521
ENSMUSG00000004317	Clcn5	4.77599	4.77811	4.73469	4.74029	4.76614	4.78797	4.21838	4.19655	4.24639	4.16377	4.40046	4.26516	4.35418	4.36491	4.35408	4.3287	4.45433	4.36129	5.16337	5.19908	5.15733	5.10816	5.15736	5.19274	5.40228	5.33529	5.41406	5.34433	5.31239	5.33952	5.1979	5.18515	5.25689	5.26382	4.76293	4.7648	4.22044	4.27646	4.35955	4.37904	5.17326	5.15275	5.38388	5.33208	5.19153	5.26035	26.8093	0.0173366
ENSMUSG00000004319	Clcn3	9.51254	9.46648	9.61212	9.7482	9.59943	9.59405	9.34453	9.11945	9.41201	9.39641	9.38013	9.35671	9.48664	9.37359	9.28526	9.35588	9.33378	9.11676	10.0441	10.0934	10.1901	10.0369	10.1067	10.1163	10.2338	10.039	10.2369	10.1708	10.1766	10.1031	10.0958	10.1114	9.89135	10.0152	9.53038	9.64723	9.292	9.37775	9.43011	9.32497	10.1092	10.0867	10.1699	10.1502	10.1036	9.95326	775.066	0.170769
ENSMUSG00000004347	Pde1c	3.51473	3.54819	3.4868	3.70982	3.5835	3.57222	2.58432	2.59258	2.5633	2.58189	2.66469	2.522	3.13135	3.19419	3.13124	3.12868	3.22108	3.19646	4.00209	4.02636	3.94035	4.07049	3.99165	3.95128	4.48037	4.49959	4.43833	4.47168	4.59055	4.49687	5.03219	5.00478	4.99605	4.99451	3.51657	3.62185	2.58007	2.58953	3.16277	3.16033	3.9896	4.00447	4.47276	4.5197	5.01848	4.99528	13.749	1.12018
ENSMUSG00000004356	Utp20	7.14794	7.14332	7.10608	7.26367	7.22906	6.99273	6.68814	6.49972	6.72188	6.81361	6.66623	6.66762	7.00361	7.12708	6.90506	7.05013	7.04703	6.87194	7.53902	7.61565	7.50705	7.58668	7.62604	7.63915	7.84202	7.96272	7.71183	7.82914	7.74739	7.90057	7.72625	7.7195	7.6173	7.70695	7.13245	7.16182	6.63658	6.71582	7.06535	7.00074	7.55391	7.61729	7.83886	7.8257	7.72287	7.66212	143.947	0.0593849
ENSMUSG00000004360	9330159F19Rik	2.35066	2.33937	2.31047	2.38438	2.33211	2.33725	2.22366	2.24722	2.37255	2.34557	2.31494	2.37196	2.19551	2.20988	2.16944	2.14391	2.1954	2.18707	2.64785	2.65633	2.67371	2.66236	2.67894	2.67895	3.07622	3.12323	3.09899	3.07028	3.06563	3.09708	3.28394	3.30172	3.3105	3.26444	2.3335	2.35125	2.28114	2.34416	2.20269	2.16958	2.6593	2.67342	3.09948	3.07766	3.29283	3.28747	5.57683	0.386231
ENSMUSG00000004364	Cul3	10.0724	10.1748	10.2194	10.2631	10.252	10.2319	10.0353	9.46324	9.97422	10.0676	9.94902	10.0811	10.2858	10.1796	10.0884	10.15	10.0437	9.96209	10.7227	10.7609	10.658	10.7702	10.6384	10.8847	10.9652	10.8742	10.7406	10.6769	10.8013	10.9165	10.8427	10.8188	10.6361	10.5288	10.1555	10.249	9.82427	10.0326	10.2327	10.094	10.7139	10.7644	10.86	10.7983	10.8307	10.5825	1181.11	0.134866
ENSMUSG00000004366	Sst	6.59555	6.38986	6.29792	6.33135	6.16502	6.48031	6.27828	6.76436	6.33072	6.10839	6.45025	6.16766	6.29604	6.14152	6.25085	6.16144	6.44823	6.34975	7.58375	7.33763	7.84796	7.57588	7.4769	7.25712	7.61408	7.78045	7.66051	8.06499	7.96773	7.73928	8.24862	7.93115	8.09226	8.28867	6.42778	6.32556	6.45779	6.2421	6.21878	6.28684	7.58978	7.43663	7.68501	7.924	8.08989	8.19047	83.6667	-0.283216
ENSMUSG00000004383	Large1	9.29049	9.24824	9.14809	9.50832	9.2178	9.30332	9.20172	9.28302	9.2014	9.19857	9.17125	9.13578	9.01942	9.21486	9.24193	9.11973	9.06377	9.22102	9.98184	10.0029	10.1099	9.92501	10.0635	9.91328	10.105	9.97099	10.1013	10.0521	10.084	9.8969	9.84998	9.904	9.84406	9.8021	9.22894	9.34315	9.22871	9.16853	9.11714	9.14181	10.0315	9.96725	10.0591	10.011	9.87699	9.82308	630.752	0.169227
ENSMUSG00000004393	Ddx56	7.28389	7.28301	7.17479	7.38579	7.14746	7.30081	7.18408	7.08547	7.01679	7.15497	7.07625	7.0928	7.05264	7.00415	7.05244	6.99232	7.07487	7.21125	7.82961	7.56458	7.74324	7.66966	7.62949	7.73806	7.82991	7.8126	7.86738	7.8193	7.82276	7.82338	7.83732	7.76343	7.84369	7.76223	7.24723	7.27802	7.09545	7.10801	7.0284	7.03988	7.71248	7.67907	7.83663	7.82181	7.80038	7.80296	155.62	0.0494167
ENSMUSG00000004394	Tmed4	7.19611	7.13768	7.06808	7.00324	7.13029	7.18044	7.19572	7.39355	7.30628	7.11986	7.26102	7.31529	6.8238	6.90912	6.91112	6.90738	6.9135	6.98679	7.75886	7.84297	7.85132	7.74008	7.83647	7.77554	8.00347	7.93893	7.98683	8.03608	8.04234	7.93873	8.10526	8.1445	8.15255	8.11067	7.13396	7.10466	7.29852	7.23206	6.86646	6.91067	7.81772	7.78403	7.97641	8.00571	8.12488	8.13161	137.806	-0.0451957
ENSMUSG00000004415	Col26a1	2.19259	2.19341	2.19479	2.17674	2.24511	2.23129	2.10656	2.17835	2.07334	2.09082	2.13365	2.06149	NA	NA	NA	NA	NA	NA	2.8562	2.83238	2.89305	2.8639	2.89646	2.84719	2.62166	2.67492	2.60209	2.64922	2.64473	2.63587	3.1731	3.18466	3.16342	3.1535	2.1936	2.21772	2.11942	2.09532	NA	NA	2.86054	2.86918	2.63289	2.64327	3.17888	3.15846	4.23958	0.700873
ENSMUSG00000004446	Bid	5.4577	5.49931	5.56541	5.62783	5.43692	5.47514	5.282	5.41426	5.35379	5.44872	5.49167	5.0994	5.32272	5.4096	5.25273	5.38644	5.27817	5.24992	6.18187	6.13412	6.0919	6.27265	6.16048	6.19197	6.21373	6.43204	6.25606	6.19634	6.25019	6.27174	6.11639	6.07677	6.12872	6.12899	5.50747	5.5133	5.35002	5.3466	5.36616	5.30578	6.13596	6.20837	6.30061	6.23943	6.09658	6.12886	47.4888	0.00409784
ENSMUSG00000004451	Ralb	4.95093	4.98935	4.91101	4.93862	4.92775	4.91423	4.84637	5.01183	4.96725	4.85642	4.88631	4.9574	4.96783	4.88003	4.9611	4.94184	4.90656	4.91139	5.45669	5.54274	5.48787	5.51839	5.46422	5.44466	5.51777	5.55774	5.51237	5.5955	5.58932	5.52529	5.65975	5.67882	5.68254	5.68706	4.95043	4.92687	4.94182	4.90004	4.92393	4.9365	5.49576	5.47576	5.52929	5.57004	5.66928	5.6848	30.6287	-0.134269
ENSMUSG00000004455	Ppp1cc	1.60913	1.65752	1.59972	1.65338	1.60968	1.60729	NA	NA	NA	NA	NA	NA	NA	NA	NA	NA	NA	NA	NA	NA	NA	NA	NA	NA	NA	NA	NA	NA	NA	NA	NA	NA	NA	NA	1.62212	1.62345	NA	NA	NA	NA	NA	NA	NA	NA	NA	NA	3.4399	0.00930386
ENSMUSG00000004460	Dnajb11	8.21689	8.22944	8.24377	8.28095	8.32228	8.30808	8.24432	8.22705	8.48066	8.24744	8.2534	8.64206	8.22034	8.11981	8.0278	8.17292	8.17803	7.95245	8.84271	8.80993	8.9023	8.96997	8.81705	8.81434	8.9706	8.90783	8.88095	8.85542	8.93781	8.83412	8.9537	9.06788	8.85308	8.8955	8.23003	8.30377	8.31734	8.38097	8.17008	8.12625	8.85165	8.86712	8.91979	8.87578	9.01079	8.87429	308.435	0.134253
ENSMUSG00000004462	Tbccd1	4.50985	4.47209	4.53037	4.67385	4.5219	4.41552	4.20076	4.28754	4.39399	4.18092	4.29558	4.09414	4.37098	4.36032	4.31735	4.32373	4.34322	4.2509	4.8996	4.95063	4.98897	4.90462	4.95337	4.89042	5.0251	5.10355	5.10413	5.10223	5.09099	5.13607	4.90356	4.87922	4.97821	4.94328	4.5041	4.53709	4.2941	4.19021	4.36565	4.3281	4.9464	4.91614	5.07759	5.10977	4.89139	4.96075	25.2989	0.219317
ENSMUSG00000004473	Clec11a	2.5301	2.58274	2.54522	2.60845	2.55074	2.6184	2.4172	2.44167	2.41057	2.44383	2.4155	2.40169	2.33462	2.35201	2.37847	2.38211	2.3526	2.34419	3.57449	3.54372	3.61064	3.60518	3.53938	3.57145	3.64693	3.66362	3.6494	3.64267	3.65111	3.67822	2.88933	2.8812	2.90283	2.89901	2.55269	2.59253	2.42315	2.42034	2.34331	2.37106	3.57628	3.572	3.65332	3.65733	2.88526	2.90092	6.39133	0.803819
ENSMUSG00000004500	Zfp324	4.27779	4.26475	4.26614	4.25429	4.20137	4.25837	4.2477	4.08264	4.28305	4.13561	4.19085	4.02132	4.33832	4.23344	4.25858	4.20842	4.18264	4.34545	4.57133	4.67415	4.65295	4.56755	4.69839	4.60086	4.83579	4.91874	4.94118	4.99086	4.96646	4.9632	5.01668	4.97235	4.93327	4.98911	4.26956	4.23801	4.20446	4.11593	4.28588	4.21655	4.63281	4.62226	4.89857	4.97351	4.99451	4.96119	19.1283	-0.244415
ENSMUSG00000004508	Gab2	4.62496	4.53933	4.53441	4.44913	4.65626	4.58364	5.02209	5.01085	5.02671	4.89814	5.02128	4.8163	4.75921	4.75366	4.71631	4.70872	4.70767	4.84194	5.83021	5.87595	5.81924	5.90662	5.78714	5.87918	5.64616	5.6629	5.63896	5.72864	5.7635	5.66118	5.89054	5.88182	5.94083	6.03496	4.56623	4.56301	5.01988	4.91191	4.75643	4.7109	5.8418	5.85764	5.64934	5.71777	5.88618	5.9879	22.327	0.00586512
ENSMUSG00000004530	Coro1c	7.62641	7.65468	7.55851	7.40294	7.60021	7.69356	7.52552	7.68909	7.60152	7.49152	7.61556	7.55345	7.53604	7.47036	7.50714	7.50497	7.48135	7.42748	8.29807	8.35961	8.36635	8.40698	8.36425	8.34385	8.30137	8.46952	8.4339	8.43181	8.52956	8.41156	8.55696	8.57321	8.69156	8.63815	7.6132	7.56557	7.60538	7.55351	7.5032	7.49782	8.34134	8.37169	8.40159	8.45764	8.56509	8.66485	191.041	-0.0609511
ENSMUSG00000004535	Tax1bp1	10.2267	10.2985	10.2963	10.4749	10.3012	10.3771	10.2549	9.78362	10.1019	10.1582	10.0335	10.2344	10.2946	10.1698	10.0035	10.0923	10.1222	9.98968	10.8875	10.8212	10.7667	10.7189	10.6773	10.8189	10.9832	10.8951	10.8235	10.6455	10.8047	10.9523	10.8973	10.9605	10.7048	10.7058	10.2738	10.3844	10.0468	10.142	10.2322	10.0727	10.8251	10.7384	10.9006	10.8008	10.9289	10.7053	1291.81	0.157407
ENSMUSG00000004558	Ndrg2	7.93089	7.75011	7.83929	7.89769	7.83239	8.05126	8.4315	8.21175	8.21936	7.8347	8.25413	9.01183	7.52524	7.4912	7.61951	7.51588	7.59524	7.48295	8.55778	8.45976	8.39995	8.46832	8.58799	8.55627	8.89187	9.05065	8.9207	9.18507	8.9606	8.94326	9.12944	9.05322	9.45708	9.54997	7.84009	7.92711	8.28754	8.36689	7.50822	7.57688	8.4725	8.53752	8.95441	9.02964	9.09133	9.50353	237.497	0.171294
ENSMUSG00000004561	Mettl17	4.041	3.99763	4.02976	3.90369	3.98261	4.04451	4.03864	4.00327	3.91055	4.02142	3.9134	4.07218	3.76194	3.82801	3.79507	3.85575	3.85552	3.81327	4.90873	4.80538	4.8515	4.7886	4.94194	4.83503	4.75151	4.77319	4.75515	4.8638	4.82712	4.83988	4.89997	4.89453	4.90495	4.89339	4.0228	3.97694	3.98415	4.00233	3.79498	3.83545	4.8552	4.85519	4.75995	4.8436	4.89725	4.89917	14.9014	-0.382145
ENSMUSG00000004562	Arhgef40	3.30101	3.25762	3.20458	3.18207	3.25567	3.23964	2.95032	2.89416	2.99782	2.96026	2.99831	2.907	2.96227	2.96465	2.99461	3.05574	3.0021	2.96296	4.03266	4.04146	3.9706	3.96187	4.00508	3.97534	4.26084	4.29967	4.27942	4.3195	4.30023	4.3291	4.4812	4.44873	4.47869	4.49168	3.25441	3.22579	2.94743	2.95519	2.96346	3.01748	4.01491	3.98076	4.27998	4.31628	4.46497	4.48518	8.67482	-0.399065
ENSMUSG00000004565	Pnpla6	6.85064	6.89027	6.70127	6.58363	6.93006	6.77101	6.74738	6.99917	6.82205	6.70976	6.73772	6.837	6.65709	6.62016	6.7672	6.61436	6.62397	6.76937	7.54801	7.40989	7.46349	7.46909	7.55821	7.42021	7.52271	7.56959	7.53726	7.65272	7.53494	7.55226	7.65095	7.6231	7.63483	7.53845	6.81406	6.76157	6.8562	6.76149	6.63862	6.66851	7.4738	7.48251	7.54319	7.57997	7.63702	7.58664	108.772	-0.0967865
ENSMUSG00000004567	Mcoln1	8.21325	8.19712	8.32429	8.10607	8.21856	8.1992	7.97067	8.23304	8.04972	7.995	8.15573	8.08033	7.49949	7.74365	7.86065	7.81374	7.71092	7.66088	8.72844	8.65294	8.75641	8.64263	8.77823	8.63466	8.7259	8.72087	8.88436	8.96116	8.85743	8.75185	8.82032	8.85419	8.8624	8.9384	8.24488	8.17461	8.08447	8.07702	7.62157	7.7951	8.7126	8.68518	8.77704	8.85681	8.83725	8.9004	295.597	-0.110138
ENSMUSG00000004568	Arhgef18	7.50406	7.53615	7.57107	7.67489	7.50699	7.40733	7.24042	7.4397	7.39617	7.32329	7.19486	7.33346	7.29863	7.22735	7.29191	7.24604	7.27609	7.381	7.86754	7.98387	7.83532	8.03319	7.98778	7.9652	8.08826	8.1632	8.02736	8.10921	8.0668	8.14623	8.18547	8.10907	8.23248	8.20393	7.53709	7.52973	7.35877	7.28387	7.26299	7.27135	7.89558	7.99539	8.09294	8.10741	8.14727	8.21821	187.958	-0.0311828
ENSMUSG00000004591	Pkn2	5.78825	5.76428	5.8639	5.85559	5.76569	5.8357	5.59922	5.29182	5.39537	5.5555	5.50155	5.32164	5.8982	5.69964	5.81733	5.79922	5.72651	5.72318	6.3577	6.46462	6.32948	6.46173	6.44461	6.51397	6.69184	6.63931	6.54138	6.48157	6.61646	6.66132	6.38131	6.36341	6.32171	6.25863	5.80548	5.819	5.4288	5.45956	5.79892	5.78102	6.38393	6.47344	6.62418	6.58645	6.37236	6.29017	56.9812	0.0408351
ENSMUSG00000004609	Cd33	NA	NA	NA	NA	NA	NA	NA	NA	NA	NA	NA	NA	NA	NA	NA	NA	NA	NA	NA	NA	NA	NA	NA	NA	NA	NA	NA	NA	NA	NA	2.33248	2.33065	2.35586	2.38892	NA	NA	NA	NA	NA	NA	NA	NA	NA	NA	2.33156	2.37239	NA	NA
ENSMUSG00000004610	Etfb	3.97249	3.92086	3.86206	3.80056	3.90887	3.87448	3.80301	3.94628	3.76666	3.88759	3.8489	3.80437	3.49313	3.53276	3.50763	3.54444	3.49656	3.52373	4.37424	4.46434	4.46959	4.42567	4.44421	4.37999	4.59555	4.59592	4.5534	4.5515	4.58186	4.59583	4.48202	4.47024	4.47473	4.4768	3.91847	3.8613	3.83865	3.84695	3.51294	3.51621	4.43606	4.41662	4.58162	4.5764	4.47613	4.47577	13.721	-0.538812
ENSMUSG00000004626	Stxbp2	3.53909	3.65541	3.5789	3.50579	3.58208	3.61045	3.37039	3.38659	3.20981	3.32737	3.26997	3.19249	3.28107	3.31346	3.33316	3.29425	3.35358	3.27457	4.43751	4.38741	4.3844	4.44777	4.40822	4.37256	4.39104	4.45462	4.4765	4.44997	4.49405	4.45972	4.65261	4.61746	4.61938	4.71779	3.59113	3.56611	3.32226	3.26328	3.29727	3.327	4.40311	4.40951	4.44072	4.46791	4.63504	4.66858	11.0615	-0.281016
ENSMUSG00000004631	Sgce	7.27672	7.41677	7.48011	7.38972	7.32118	7.30662	7.16717	6.89959	7.16485	7.29972	7.15409	7.07729	7.06013	7.15056	6.85171	6.98523	7.07252	6.89063	7.65804	7.69002	7.61898	7.7468	7.82542	7.76965	8.09833	8.06915	8.09712	7.92762	8.02386	8.10128	7.71034	7.9734	7.7564	7.78307	7.3912	7.33917	7.0772	7.17704	7.10534	6.96982	7.65568	7.78062	8.0882	8.01758	7.84187	7.76973	165.942	-0.121263
ENSMUSG00000004633	Chn2	6.43281	6.31715	6.44718	6.3496	6.4463	6.54834	6.25835	6.07321	6.19522	6.25802	6.22795	6.17306	6.25022	6.3463	6.2202	6.29644	6.44971	6.20961	6.98065	7.16155	7.02393	7.08241	7.04265	7.07299	7.28296	7.16141	7.10084	7.16748	7.31327	7.25973	7.20108	7.17483	7.23789	7.19689	6.39905	6.44808	6.1756	6.21968	6.29826	6.32212	7.05537	7.06602	7.18174	7.24683	7.18795	7.21739	85.359	0.161624
ENSMUSG00000004637	Wwox	6.077	6.05959	6.17052	6.46599	6.18252	6.07801	5.77067	5.86207	5.74566	5.75273	5.82001	5.99566	5.70337	5.7108	5.77511	5.80266	5.81867	5.62618	6.74993	6.82741	6.79788	6.83103	6.84498	6.70065	6.72118	6.70055	6.7694	6.72207	6.68317	6.75849	6.72878	6.69435	6.70239	6.76978	6.10237	6.24217	5.7928	5.85613	5.70708	5.79882	6.79174	6.79222	6.73038	6.72124	6.71157	6.73608	77.3908	0.423094
ENSMUSG00000004642	Slbp	7.05871	7.02539	7.03565	6.91253	7.07999	7.196	6.94365	6.84856	6.74246	6.90842	6.98083	6.74979	7.06134	6.99531	7.11034	7.10224	7.06299	6.98638	7.86387	7.73703	7.77436	7.73501	7.58232	7.77563	7.72977	7.76249	7.68244	7.71643	7.81519	7.78908	7.70456	7.72973	7.72961	7.72109	7.03992	7.06284	6.84489	6.87968	7.02832	7.09186	7.79175	7.69765	7.7249	7.77357	7.71714	7.72535	131.434	0.0906058
ENSMUSG00000004661	Arid3b	2.49986	2.51516	2.52137	2.50653	2.57178	2.49671	2.20527	2.14721	2.1661	2.15421	2.18476	2.11444	2.93102	2.91027	2.88226	2.91006	3.02544	2.90162	3.07382	3.05087	3.03365	3.03436	3.03323	3.0215	3.54851	3.53321	3.5007	3.50437	3.46557	3.53799	3.00365	3.03255	3.00154	3.00767	2.51213	2.52501	2.17286	2.15114	2.92064	2.93925	3.05278	3.0297	3.52747	3.50265	3.0181	3.0046	5.61204	0.306664
ENSMUSG00000004667	Polr2e	8.37684	8.31215	8.39116	8.37334	8.33425	8.40551	8.26413	8.44989	8.23901	8.35327	8.29353	8.02815	8.20928	8.13323	8.17303	8.27168	8.15235	8.36406	9.09888	8.99112	9.04494	9.04814	8.91954	8.83007	8.98819	8.92277	9.06097	9.0357	9.10081	8.9454	8.96	8.98078	8.99737	9.13632	8.36005	8.37103	8.31768	8.22498	8.17126	8.19902	9.04498	8.93258	8.99064	9.0273	8.97039	9.06685	330.173	0.0202066
ENSMUSG00000004677	Myo9b	4.03385	3.97474	4.01801	4.06548	4.02038	4.0391	4.07829	4.07365	3.98212	3.99585	3.94927	3.98998	3.49051	3.47447	3.45771	3.44675	3.45753	3.38563	4.44988	4.45129	4.42	4.55099	4.48944	4.49814	4.69153	4.80411	4.70278	4.70571	4.80006	4.68601	4.61035	4.61481	4.66627	4.67319	4.00887	4.04165	4.04469	3.97837	3.48249	3.454	4.44039	4.51286	4.7328	4.73059	4.61258	4.66973	16.847	0.266877
ENSMUSG00000004698	Hdac9	8.09737	8.07519	8.08608	8.34323	8.03156	8.16304	8.03253	8.05477	7.9952	8.0664	8.08403	8.21893	8.05705	8.00424	8.02994	7.97566	7.96573	7.95832	8.72878	8.78024	8.79861	8.74806	8.70239	8.68665	8.67085	8.54132	8.76617	8.6836	8.70654	8.62885	8.62088	8.6512	8.42323	8.44892	8.08621	8.17928	8.0275	8.12312	8.03065	7.99044	8.76921	8.71237	8.65944	8.67299	8.63604	8.43608	285.016	0.156034
ENSMUSG00000004730	Adgre1	2.22228	2.18254	2.16065	2.23294	2.20391	2.1194	NA	NA	NA	NA	NA	NA	NA	NA	NA	NA	NA	NA	1.76849	1.74439	1.76842	1.73018	1.7165	1.72671	3.00482	3.01564	2.95183	3.04878	3.04222	3.01536	3.80608	3.83337	3.88783	3.98431	2.18849	2.18541	NA	NA	NA	NA	1.76043	1.72446	2.99077	3.03545	3.81973	3.93607	5.16828	-0.0264984
ENSMUSG00000004748	Mtfp1	7.81358	7.69416	7.74887	7.79921	7.62287	7.69193	7.54611	7.94009	7.62729	7.58588	7.66125	7.62322	7.48981	7.33361	7.49847	7.39179	7.43072	7.51184	8.34282	8.10168	8.24459	8.18189	8.16997	8.07613	8.2199	8.23218	8.45697	8.36186	8.36867	8.30322	8.39667	8.437	8.59238	8.58209	7.7522	7.70467	7.7045	7.62345	7.41171	7.44032	8.2297	8.14266	8.30302	8.34458	8.41683	8.58724	213.613	-0.107932
ENSMUSG00000004768	Rab23	6.27876	6.22558	6.35327	6.31654	6.26734	6.2971	6.21607	5.99936	6.2011	6.12616	5.98967	6.08514	6.30596	6.19725	6.23353	6.25204	6.1545	6.18777	6.73342	6.77751	6.81356	6.75458	6.74188	6.78775	6.82357	6.85604	6.74311	6.76122	6.81406	6.91955	6.83285	6.80479	6.79561	6.88184	6.28587	6.29366	6.13884	6.06699	6.2516	6.21336	6.77483	6.7614	6.80757	6.83161	6.81882	6.83873	78.8544	0.0186506
ENSMUSG00000004771	Rab11a	9.88341	10.0326	10.1635	10.2626	10.0294	10.0184	10.0392	9.33831	9.77639	10.094	9.85732	9.94784	9.76408	9.98328	9.76993	9.78409	9.73571	9.70263	10.465	10.3029	10.3435	10.2454	10.2963	10.4273	10.8732	10.8253	10.7808	10.3862	10.442	10.759	10.5174	10.6466	10.4708	10.1872	10.0265	10.1035	9.71798	9.9664	9.87368	9.76324	10.3705	10.323	10.8264	10.5291	10.582	10.329	1081.06	0.106903
ENSMUSG00000004788	Eif2b2	6.96802	6.94872	6.86062	6.67526	6.86982	7.03229	7.06184	7.13067	6.73125	6.95354	6.85363	7.02336	6.57582	6.66069	6.78133	6.75617	6.81869	6.83748	7.49562	7.43385	7.41132	7.4576	7.44346	7.43239	7.53315	7.62196	7.68863	7.6505	7.67498	7.61086	7.54638	7.60092	7.60572	7.69602	6.92579	6.85912	6.97459	6.94351	6.61826	6.7854	7.44693	7.44448	7.61458	7.64544	7.57365	7.65087	116.949	-0.116354
ENSMUSG00000004789	Dlst	8.62506	8.71608	8.76201	8.8362	8.79894	8.70562	8.69541	8.41199	8.55111	8.64614	8.50961	8.61602	8.46499	8.50329	8.426	8.51607	8.46692	8.51822	9.23921	9.13671	9.24387	9.16061	9.18429	9.17591	9.41416	9.34923	9.42916	9.33569	9.25665	9.39633	9.26716	9.33624	9.22868	9.2057	8.70105	8.78025	8.55283	8.59059	8.48414	8.46966	9.2066	9.1736	9.39752	9.32955	9.3017	9.21719	430.081	0.123898
ENSMUSG00000004791	Pgf	NA	NA	NA	NA	NA	NA	2.22474	2.26707	2.27271	2.23746	2.23602	2.27584	2.29093	2.26919	2.29003	2.33155	2.32672	2.2741	2.69506	2.71176	2.6551	2.68542	2.70889	2.68469	2.90171	2.86935	2.87128	2.86251	2.89098	2.87716	2.78753	2.82666	2.80903	2.80391	NA	NA	2.25484	2.24977	2.28006	2.3161	2.68731	2.693	2.88078	2.87688	2.80709	2.80647	NA	NA
ENSMUSG00000004798	Ulk2	7.76411	7.81163	7.84603	7.88392	7.88306	7.64509	7.48474	7.21836	7.45972	7.46993	7.36038	7.72301	7.7706	7.76325	7.62709	7.70118	7.72418	7.63322	8.14398	8.2738	8.24257	8.37127	8.37018	8.42418	8.54028	8.38074	8.23097	8.42544	8.33582	8.39129	8.38773	8.35756	8.37801	8.35228	7.80726	7.80402	7.38761	7.51777	7.76693	7.68415	8.22011	8.38854	8.38399	8.38418	8.37265	8.36514	225.749	-0.00799947
ENSMUSG00000004815	Dgkq	6.03082	6.01701	5.87362	5.86024	5.92951	5.89207	5.98094	6.14093	5.8078	5.93349	5.93895	5.93577	5.55493	5.65501	5.75343	5.77107	5.78899	5.90688	6.51711	6.63884	6.66239	6.49602	6.57894	6.5383	6.47117	6.49651	6.65483	6.66189	6.61403	6.55921	6.57612	6.56622	6.64663	6.71759	5.97381	5.89394	5.97656	5.93607	5.60497	5.77116	6.60611	6.53775	6.54084	6.61171	6.57117	6.68211	60.3064	-0.267321
ENSMUSG00000004843	Chmp2b	8.15817	8.25303	8.34388	8.29528	8.16486	8.35475	7.99102	7.94708	8.07315	8.13259	8.07815	8.19051	8.31372	8.17109	8.09376	8.18236	8.0439	8.04136	8.73678	8.64026	8.63172	8.62493	8.59409	8.7484	8.97817	8.82467	8.80357	8.81743	8.78199	8.89489	8.82795	8.94137	8.66378	8.69242	8.25169	8.27163	8.00375	8.13375	8.2424	8.10668	8.66959	8.65581	8.8688	8.83144	8.88466	8.6781	308.51	0.0357413
ENSMUSG00000004846	Plod3	6.39095	6.29246	6.29183	6.32241	6.29125	6.32949	6.12544	6.24355	6.32602	6.13086	6.11468	6.32504	5.93171	5.98576	6.15252	5.91945	6.03003	5.90402	6.73993	6.7349	6.78674	6.70528	6.86608	6.78924	6.99517	6.82958	7.02306	7.05304	7.02458	7.02124	7.07862	7.14317	7.0548	7.14216	6.32508	6.31438	6.23167	6.19019	5.95873	6.034	6.75386	6.78687	6.94927	7.03295	7.1109	7.09848	79.9553	-0.0365175
ENSMUSG00000004849	Ap1s1	9.66824	9.82281	9.79855	9.50014	9.76946	9.62954	9.58401	9.63465	9.5146	9.69087	9.66846	9.4677	9.53142	9.64037	9.55569	9.40064	9.43411	9.66671	10.29	10.1154	10.0789	10.3291	10.2302	10.1948	10.4964	10.4511	10.4653	10.4672	10.4508	10.3621	10.3196	10.4244	10.4682	10.5242	9.7632	9.63305	9.57776	9.60901	9.5859	9.46348	10.1614	10.2514	10.4709	10.4267	10.372	10.4962	832.981	-0.181072
ENSMUSG00000004865	Srpk1	8.07558	8.1535	8.16712	7.96917	8.14241	8.22607	8.04742	7.92139	8.27289	8.08621	7.90028	8.0949	8.18144	8.04119	8.09517	8.02763	8.06819	8.14238	8.76475	8.72409	8.67152	8.73237	8.74438	8.83083	8.97248	8.9368	8.87607	8.81535	8.86385	8.92878	8.79447	8.79304	8.65021	8.56945	8.13206	8.11255	8.08057	8.02713	8.11131	8.06366	8.72012	8.76919	8.92845	8.86933	8.79376	8.60983	277.708	-0.00556906
ENSMUSG00000004880	Lbr	4.20488	4.3167	4.32345	4.20031	4.25562	4.3141	4.4976	4.46306	4.31199	4.36283	4.43692	4.40907	4.41992	4.30223	4.28354	4.24731	4.31867	4.35991	5.06859	5.06406	5.02604	5.01224	5.08596	5.06307	4.96137	4.93946	4.95423	4.96326	4.94673	4.94364	5.00516	4.98503	5.0298	4.97777	4.28168	4.25668	4.42422	4.40294	4.36108	4.28317	5.0529	5.05376	4.95169	4.95121	4.9951	5.00378	18.59	-0.174104
ENSMUSG00000004885	Crabp2	NA	NA	NA	NA	NA	NA	NA	NA	NA	NA	NA	NA	NA	NA	NA	NA	NA	NA	NA	NA	NA	NA	NA	NA	NA	NA	NA	NA	NA	NA	2.30731	2.28157	2.3068	2.31164	NA	NA	NA	NA	NA	NA	NA	NA	NA	NA	2.29444	2.30922	NA	NA
ENSMUSG00000004891	Nes	2.8538	2.86251	2.85883	2.80188	2.82955	2.87281	2.87598	2.7698	2.62591	2.75501	2.62114	2.68973	2.64389	2.70307	2.65473	2.66634	2.69131	2.69563	3.80586	3.8536	3.81074	3.88685	3.83049	3.83238	3.77594	3.82219	3.77608	3.65663	3.69316	3.74207	2.48751	2.49316	2.46482	2.47419	2.85838	2.83475	2.75723	2.68863	2.67348	2.67079	3.8234	3.84991	3.7914	3.69729	2.49034	2.46951	6.64528	-0.401002
ENSMUSG00000004892	Bcan	6.01789	5.91912	5.87253	5.81094	5.95301	6.09338	6.6364	6.55042	6.46016	6.34106	6.4624	7.21043	5.67778	5.73992	5.9205	5.79402	5.69961	5.67888	6.68353	6.60603	6.72981	6.67628	6.75364	6.6903	7.24411	7.39898	7.28618	7.51594	7.23876	7.2107	7.46194	7.32261	7.47725	7.53321	5.93651	5.95244	6.54899	6.6713	5.70885	5.80471	6.67312	6.70674	7.30976	7.3218	7.39227	7.50523	60.2293	0.0848768
ENSMUSG00000004894	Hapln2	NA	NA	NA	NA	NA	NA	NA	NA	NA	NA	NA	NA	NA	NA	NA	NA	NA	NA	NA	NA	NA	NA	NA	NA	2.46263	2.44265	2.45343	2.49002	2.47726	2.45763	NA	NA	NA	NA	NA	NA	NA	NA	NA	NA	NA	NA	2.4529	2.47497	NA	NA	NA	NA
ENSMUSG00000004895	Prcc	6.14155	6.25281	6.22454	6.0216	6.21982	6.24785	6.10958	6.29117	6.27498	6.17481	6.07291	6.25563	6.17099	5.95354	6.10252	6.18394	5.9713	6.09402	6.93177	6.90364	6.9838	7.0768	7.00751	6.93697	6.83204	6.96316	6.86492	6.87976	6.95681	6.73088	7.05479	7.08086	7.13092	7.09349	6.2063	6.16309	6.22524	6.16778	6.06227	6.08592	6.93973	7.00709	6.88671	6.85582	7.06782	7.11221	71.0932	-0.0943143
ENSMUSG00000004896	Rrnad1	5.09299	5.11326	5.10996	5.20112	5.10512	5.10266	4.6804	4.87339	4.81538	4.8233	4.83839	4.73406	4.89004	4.88302	4.89854	4.76332	4.9135	4.94731	5.45995	5.47594	5.54985	5.58992	5.54211	5.56053	5.48027	5.55179	5.58845	5.5592	5.54843	5.47429	5.6193	5.64051	5.64861	5.67475	5.1054	5.1363	4.78973	4.79859	4.88653	4.85845	5.49525	5.56419	5.54017	5.5273	5.62991	5.66168	35.9017	0.126884
ENSMUSG00000004897	Hdgf	7.45564	7.41603	7.48385	7.2404	7.45268	7.44983	7.45681	7.76844	7.42529	7.44022	7.53459	7.49621	7.64494	7.40591	7.48998	7.49556	7.52113	7.57641	8.3293	8.32426	8.30747	8.34585	8.26678	8.33538	8.27361	8.29072	8.34289	8.37083	8.39558	8.25536	8.30682	8.35528	8.32954	8.2974	7.45184	7.38097	7.55018	7.49034	7.52542	7.50223	8.32034	8.31601	8.3024	8.34059	8.33105	8.31347	169.349	-0.111904
ENSMUSG00000004902	Slc25a18	3.56974	3.50729	3.44122	3.47468	3.47425	3.5143	4.04225	4.01511	4.26007	3.91357	4.02186	4.24863	3.76831	3.70343	3.68218	3.69459	3.72348	3.73121	4.59749	4.62795	4.6101	4.58236	4.61785	4.60875	5.21264	5.30709	5.16859	5.42246	5.428	5.40158	5.98465	5.95831	6.2991	6.37175	3.50608	3.48774	4.10581	4.06135	3.73587	3.70008	4.61185	4.60299	5.22944	5.41735	5.97148	6.33542	10.9477	-0.229352
ENSMUSG00000004929	Thop1	7.94878	7.91182	7.68204	7.61567	7.75247	7.74389	7.66638	7.78382	7.64282	7.64063	7.53754	7.38518	7.42413	7.60432	7.67826	7.54674	7.66065	7.74742	8.26516	8.40587	8.25376	8.32007	8.31515	8.22642	8.25095	8.47297	8.24727	8.33978	8.43561	8.38163	8.42433	8.32682	8.53154	8.53557	7.84755	7.70401	7.69767	7.52111	7.51423	7.62855	8.30827	8.28721	8.32373	8.38567	8.37557	8.53356	218.645	-0.274312
ENSMUSG00000004931	Apba3	3.80693	3.74849	3.77117	3.76098	3.7439	3.66546	3.46827	3.48262	3.495	3.42582	3.49433	3.54686	3.48525	3.44493	3.44123	3.51545	3.52177	3.45457	4.31084	4.31205	4.36909	4.3377	4.39708	4.36275	4.51937	4.51617	4.49701	4.57635	4.54117	4.4952	4.86163	4.88922	4.89374	5.04502	3.77553	3.72345	3.48196	3.48901	3.46509	3.49282	4.33066	4.36585	4.51085	4.53757	4.87543	4.96938	13.7355	-0.552119
ENSMUSG00000004933	Matk	7.53538	7.48359	7.3209	7.49257	7.33585	7.43915	7.23178	7.70045	7.26091	7.23694	7.35767	7.19639	7.23611	7.21618	7.40033	7.30706	7.18371	7.27708	8.03319	8.00643	8.19097	8.10009	8.10034	8.00256	7.97231	8.02367	8.1243	8.1828	8.05009	7.97282	8.31048	8.18674	8.39374	8.44407	7.44662	7.42253	7.39771	7.26367	7.22614	7.29703	8.07686	8.06767	8.04009	8.06857	8.24861	8.41891	174.195	-0.0706804
ENSMUSG00000004934	Pias4	6.26639	6.26137	6.11459	6.25571	6.17558	6.18516	6.00337	6.28443	6.16966	6.08582	6.06329	5.96565	5.74005	5.86625	5.96723	5.88468	5.99419	5.89696	6.66164	6.78427	6.7296	6.74472	6.7271	6.69272	6.75103	6.92532	6.82818	6.88394	6.86659	6.89698	6.93931	6.90396	6.88368	6.93102	6.21412	6.20548	6.15249	6.03825	5.80315	5.9487	6.72517	6.72151	6.83484	6.8825	6.92163	6.90735	74.618	-0.0496554
ENSMUSG00000004936	Map2k1	10.6375	10.6195	10.5371	10.7093	10.5176	10.6349	10.4415	10.5514	10.4757	10.4885	10.4755	10.357	10.3785	10.3663	10.4649	10.4468	10.4394	10.5257	11.1404	11.1915	11.1343	11.1482	11.1134	11.2058	11.2228	11.2565	11.3372	11.222	11.1889	11.2454	11.2164	11.18	11.2337	11.136	10.598	10.6206	10.4895	10.4404	10.3724	10.4504	11.1554	11.1558	11.2722	11.2188	11.1982	11.1849	1566.17	0.0289929
ENSMUSG00000004937	Sgta	8.73991	8.7834	8.66165	9.0155	8.69573	8.62739	8.59629	8.79183	8.49273	8.57514	8.67739	8.57352	8.36264	8.46142	8.56549	8.50943	8.50333	8.66827	9.34049	9.20714	9.36066	9.32419	9.28905	9.20965	9.34719	9.48358	9.39263	9.41932	9.35635	9.30331	9.38355	9.41733	9.56468	9.48579	8.72832	8.77954	8.62695	8.60868	8.41203	8.52608	9.30276	9.2743	9.4078	9.35966	9.40044	9.52523	438.651	0.079967
ENSMUSG00000004945	Tmem242	5.8627	5.85897	5.84889	6.02028	5.7874	5.79846	5.58897	5.48381	5.40481	5.62115	5.6107	5.61509	5.81585	5.75276	5.82699	5.7323	5.75325	5.80699	6.38974	6.44203	6.55447	6.36468	6.37252	6.34981	6.43625	6.41763	6.55158	6.41363	6.48446	6.42156	6.34309	6.30446	6.35211	6.29584	5.85685	5.86871	5.49253	5.61565	5.78431	5.77085	6.46208	6.36234	6.46849	6.43988	6.32377	6.32397	60.6017	0.0202489
ENSMUSG00000004947	Dtx2	4.25278	4.2118	4.20094	4.08387	4.16678	4.24045	4.18613	4.27524	4.29038	4.16913	4.27259	4.25969	3.92893	3.9976	3.99492	3.98851	3.95115	3.93813	4.66767	4.69102	4.66869	4.69326	4.68133	4.71249	4.71956	4.74894	4.83258	4.74111	4.79547	4.74921	4.75597	4.69004	4.7609	4.71866	4.22184	4.1637	4.25058	4.2338	3.96327	3.97819	4.67579	4.69569	4.76703	4.76193	4.723	4.73978	17.0082	-0.440068
ENSMUSG00000004952	Rasa4	2.55859	2.54898	2.6332	2.53316	2.59466	2.55515	2.17035	2.1957	2.07313	2.06556	2.07996	2.06139	NA	NA	NA	NA	NA	NA	2.88655	2.92002	2.90196	2.98927	2.89849	2.93674	2.77747	2.7181	2.7291	2.73008	2.74259	2.74419	3.21436	3.21459	3.22226	3.26834	2.58026	2.56099	2.14639	2.06897	NA	NA	2.90284	2.9415	2.74156	2.73896	3.21448	3.2453	5.63851	-0.405775
ENSMUSG00000004961	Syt5	10.2139	10.2407	10.1879	10.0001	10.1959	10.1378	10.0255	10.1394	10.0769	10.0014	10.1472	10.0422	10.1899	9.9589	10.0739	10.0348	10.0033	10.1516	10.8781	10.7608	10.7199	10.7268	10.7397	10.7929	10.8994	10.7509	10.9992	10.9265	10.8902	10.822	10.8865	10.9521	10.8461	10.8459	10.2142	10.1112	10.0806	10.0636	10.0744	10.0373	10.7863	10.7531	10.8832	10.8796	10.9193	10.846	1147.27	-0.138836
ENSMUSG00000004980	Hnrnpa2b1	10.5867	10.612	10.7163	10.4341	10.6554	10.7596	10.6937	10.3913	10.5808	10.645	10.5415	10.5154	10.744	10.6559	10.4619	10.6439	10.5605	10.5192	11.257	11.1837	11.1608	11.2288	11.164	11.301	11.363	11.3966	11.2316	11.1352	11.2812	11.4032	11.3178	11.3937	11.3345	11.1209	10.6383	10.6164	10.5553	10.5673	10.7	10.5554	11.2005	11.2313	11.3304	11.2732	11.3557	11.2277	1586.89	-0.0137794
ENSMUSG00000004994	Ccdc130	5.28726	5.20239	5.27212	5.03178	5.20694	5.15184	5.17454	5.19031	4.89613	5.08447	4.96424	4.93971	5.27119	5.19654	5.21803	5.17753	5.1529	5.08395	5.86856	5.80442	5.82135	5.86901	5.90229	5.84837	5.98228	6.09215	5.99438	5.99065	5.94805	5.90955	5.95384	5.95328	5.96471	5.93766	5.25392	5.13019	5.08699	4.99614	5.23386	5.18282	5.83144	5.87322	6.02293	5.94942	5.95356	5.95119	35.009	-0.5525
ENSMUSG00000004996	Mri1	4.80862	4.89413	4.84801	4.79424	4.89727	4.8495	4.86049	4.99058	4.90097	4.91325	4.89157	4.88853	4.54264	4.58878	4.66562	4.55039	4.52441	4.60405	5.55166	5.57386	5.55817	5.6149	5.58647	5.62137	5.32092	5.44377	5.50098	5.49772	5.45759	5.42212	5.43527	5.43997	5.52181	5.59537	4.85025	4.847	4.91735	4.89778	4.56571	4.58014	5.56123	5.60758	5.42189	5.45914	5.43762	5.55859	28.1572	-0.000741699
ENSMUSG00000005034	Prkacb	10.9064	10.8601	10.9045	10.6804	10.9159	10.9282	10.8526	10.8183	10.8275	10.8193	10.8802	10.7628	10.823	10.7556	10.7766	10.7459	10.6722	10.6504	11.5434	11.4983	11.5438	11.4503	11.4977	11.4895	11.5719	11.493	11.5514	11.5861	11.6156	11.576	11.5955	11.6196	11.534	11.5316	10.8903	10.8415	10.8328	10.8208	10.7893	10.7315	11.5285	11.4792	11.5388	11.5926	11.6076	11.5328	1869.63	-0.0545055
ENSMUSG00000005043	Sgsh	3.44836	3.41894	3.38738	3.51779	3.42313	3.4579	3.67981	3.93698	3.80821	3.75839	3.81035	3.71748	3.0636	3.08742	3.14362	3.08334	3.07046	3.12946	4.50138	4.47359	4.49841	4.49449	4.49191	4.49713	4.33596	4.39224	4.38163	4.37939	4.36	4.34524	4.36114	4.39997	4.40796	4.40032	3.41823	3.46627	3.80833	3.76207	3.07551	3.09914	4.49113	4.49451	4.36994	4.36154	4.38055	4.40414	11.8202	0.543089
ENSMUSG00000005045	Chd5	9.55948	9.35795	9.29501	9.17596	9.32999	9.27449	9.30724	9.55457	9.3941	9.35107	9.21285	9.41585	9.41407	9.26446	9.3684	9.33974	9.41245	9.4326	10.0265	10.2665	10.1026	10.3373	10.1962	10.0891	10.0759	10.0024	9.99645	10.1964	10.1399	10.0365	10.1939	10.0705	10.1231	10.1675	9.40415	9.26014	9.41863	9.32659	9.33927	9.37353	10.1319	10.2075	10.0249	10.1242	10.1322	10.1453	646.701	-0.223681
ENSMUSG00000005054	Cstb	6.81623	6.9395	6.78149	7.16679	6.84286	6.87318	6.76723	6.72958	6.67206	6.78278	6.80121	6.64992	6.49811	6.54615	6.46427	6.55734	6.36932	6.41124	7.16927	7.08767	7.22764	7.14317	7.13867	7.14383	7.70832	7.66272	7.79715	7.55058	7.69969	7.68998	7.71293	7.83295	7.74387	7.71088	6.84574	6.96094	6.72296	6.74464	6.52213	6.46364	7.16153	7.14189	7.72273	7.64675	7.77294	7.72738	124.38	0.255793
ENSMUSG00000005057	Sh2b2	2.82724	2.85362	2.87882	2.95729	2.86889	2.89979	3.05911	3.05532	3.01807	2.97609	3.05613	3.06024	3.22694	3.17545	3.17613	3.1909	3.21562	3.24343	3.43226	3.4487	3.45899	3.41961	3.37773	3.40806	3.3744	3.37974	3.37357	3.41813	3.38702	3.34293	3.95252	3.93284	3.95227	3.97056	2.85323	2.90866	3.04416	3.03082	3.20119	3.19422	3.44665	3.4018	3.3759	3.3827	3.94268	3.96141	8.43188	0.906236
ENSMUSG00000005069	Pex5	7.48666	7.65383	7.55683	7.61359	7.56873	7.47361	7.37844	7.48243	7.54305	7.41784	7.43882	7.35749	7.31891	7.45014	7.39544	7.46329	7.43273	7.37792	8.06897	8.09721	8.04881	7.97435	8.10698	8.03357	8.15683	8.2796	8.09416	8.04729	8.10142	8.16768	8.23551	8.18292	8.27878	8.27812	7.56577	7.55197	7.46797	7.40472	7.38453	7.43048	8.07166	8.0383	8.17686	8.10547	8.20922	8.27845	189.723	-0.0425299
ENSMUSG00000005078	Jkamp	7.47249	7.42342	7.37086	7.54136	7.31909	7.39771	7.10625	7.2662	7.30389	7.31419	7.35771	7.21501	7.27964	7.19017	7.26354	7.2342	7.21828	7.27674	7.92461	8.06904	8.15265	8.12409	8.19895	8.00829	8.10601	8.04656	8.26258	8.34776	8.12338	8.08723	8.03396	8.05964	8.02056	8.03106	7.42226	7.41938	7.22545	7.29563	7.23491	7.23867	8.04877	8.11045	8.13838	8.18613	8.0468	8.02581	173.388	-0.0265449
ENSMUSG00000005087	Cd44	4.07082	3.99333	3.88186	4.02958	4.01153	3.93336	3.76112	3.79248	3.83157	3.83295	3.77628	3.87736	4.10163	4.05616	4.10373	4.15013	4.13769	4.09708	4.61225	4.61375	4.62032	4.61113	4.69972	4.73169	5.25445	5.2637	5.23661	5.25823	5.22633	5.1748	5.40816	5.31705	5.44653	5.52283	3.982	3.99149	3.79505	3.82886	4.07889	4.13052	4.61544	4.68085	5.25159	5.21979	5.36261	5.48468	16.3757	0.0576012
ENSMUSG00000005089	Slc1a2	11.9226	11.7934	11.9587	11.9935	11.8808	12.023	12.1239	11.9838	11.9693	11.9753	11.966	12.3534	11.5607	11.6497	11.675	11.7249	11.6835	11.5525	12.5988	12.5639	12.7471	12.5206	12.6186	12.3893	12.8173	12.815	12.8806	12.8895	12.8161	12.7882	12.6721	12.763	12.6199	12.6139	11.8916	11.9658	12.0257	12.0982	11.6052	11.6945	12.6366	12.5095	12.8377	12.8313	12.7176	12.6169	3908.85	0.1027
ENSMUSG00000005102	Eif2ak4	5.92718	5.90077	5.88418	6.06932	5.90093	5.86886	5.90235	5.96014	5.97289	5.84731	5.88799	6.00606	5.61546	5.65596	5.67146	5.61764	5.72107	5.49674	6.55588	6.52933	6.56722	6.5482	6.56589	6.5534	6.65707	6.5925	6.57108	6.63618	6.60637	6.59337	6.49347	6.51048	6.41365	6.46221	5.90404	5.94637	5.94513	5.91378	5.63571	5.67006	6.55081	6.55583	6.60688	6.61197	6.50198	6.43793	62.8771	0.117138
ENSMUSG00000005103	Wdr1	9.91193	9.96478	9.91457	10.0493	9.84853	9.9269	9.84716	9.87419	9.81235	9.80185	9.82687	9.89893	9.72057	9.78175	9.74114	9.78784	9.74249	9.68479	10.5206	10.4887	10.5489	10.4656	10.5286	10.4904	10.5596	10.6923	10.6506	10.4731	10.5706	10.6016	10.613	10.5738	10.6003	10.6092	9.93043	9.94157	9.84456	9.84255	9.75116	9.75715	10.5194	10.4949	10.6342	10.5485	10.5934	10.6048	982.675	0.01021
ENSMUSG00000005124	Ccn4	2.52969	2.494	2.52004	2.46869	2.48781	2.52505	3.05892	3.20107	3.17568	3.10945	3.17241	3.16268	2.6347	2.67435	2.68158	2.62982	2.71948	2.75684	2.97697	2.94547	2.96688	2.96989	2.96048	2.9721	3.26021	3.25624	3.24973	3.22992	3.31136	3.23778	3.06809	3.05014	3.03251	3.08822	2.51458	2.49385	3.14522	3.14818	2.65452	2.67696	2.96311	2.96749	3.2554	3.25969	3.05911	3.06037	5.2617	-0.444984
ENSMUSG00000005125	Ndrg1	5.85655	5.72397	5.73751	5.77621	5.84217	5.90236	5.73912	5.84566	5.82393	5.76247	5.77058	5.61941	5.46109	5.54476	5.59343	5.54249	5.48779	5.5404	6.21192	6.07792	6.21299	6.16624	6.1102	6.18757	6.49078	6.63412	6.5296	6.62978	6.48019	6.48256	6.86799	6.82089	6.98769	7.03512	5.77267	5.84025	5.8029	5.71749	5.50292	5.54124	6.16761	6.15467	6.5515	6.53084	6.84444	7.0114	55.7105	0.24558
ENSMUSG00000005142	Man2b1	8.12372	7.88397	7.91749	7.95452	7.95915	7.85829	7.71217	7.89036	7.76359	7.73669	7.68028	7.65151	7.6583	7.61431	7.62703	7.59831	7.6515	7.58661	8.38526	8.53164	8.53165	8.42963	8.60504	8.43689	8.59825	8.58487	8.69652	8.76531	8.66354	8.69566	8.76091	8.72478	8.90636	8.99526	7.97506	7.92399	7.78871	7.68949	7.63631	7.62562	8.48285	8.49052	8.62655	8.70817	8.74285	8.95081	248.304	-0.108329
ENSMUSG00000005148	Klf5	6.19937	6.16491	6.11402	6.00169	6.2028	6.26965	5.99484	5.99727	6.06583	5.99155	6.0941	5.95613	5.8933	5.81863	6.08301	5.99673	5.87377	5.87299	6.75018	6.68359	6.81239	6.77217	6.72951	6.96303	6.99757	6.86941	6.96059	7.0662	7.06841	6.89822	6.97029	6.96507	7.0079	7.06357	6.15943	6.15805	6.01932	6.01393	5.85596	5.9845	6.74872	6.82157	6.94252	7.01094	6.96768	7.03574	69.7584	0.035208
ENSMUSG00000005150	Wdr83	5.45152	5.27109	5.26207	5.27819	5.40487	5.4516	5.13847	5.36759	5.11274	5.02205	5.15447	5.14944	5.1262	5.06104	5.14933	5.11367	5.23385	5.26148	6.10704	6.09944	6.10704	6.15424	6.07034	5.99825	6.01288	6.06448	6.11236	6.15357	6.15267	5.93895	6.31511	6.23158	6.27747	6.32469	5.32822	5.37822	5.20626	5.10866	5.09362	5.16562	6.10451	6.07428	6.06324	6.08173	6.27334	6.30108	40.1273	0.219221
ENSMUSG00000005161	Prdx2	9.30138	9.3186	9.30078	9.40579	9.22298	9.39143	9.23505	9.35942	9.17657	9.16672	9.35488	9.0424	9.18903	9.04019	9.18094	9.08628	9.1741	9.13589	9.7775	9.7949	9.97677	9.81142	9.68439	9.72386	9.80169	9.83325	9.89024	9.89654	9.86234	9.77722	9.89045	10.0051	10.0688	10.0862	9.30692	9.34007	9.25701	9.188	9.11461	9.14711	9.84972	9.73989	9.84173	9.84537	9.94775	10.0775	642.852	0.0486492
ENSMUSG00000005198	Polr2a	9.21061	9.2488	9.24055	9.08464	9.29809	9.12398	8.96881	8.96562	9.07751	8.91867	8.793	8.88729	8.96243	9.145	8.97997	8.97669	9.11743	9.13085	9.61677	9.84496	9.57744	9.84515	9.75756	9.81512	9.76327	9.81563	9.7447	9.71007	9.76049	9.92275	9.92748	9.65515	9.92218	9.86806	9.23332	9.16891	9.00398	8.86632	9.05372	9.02469	9.67972	9.80594	9.77453	9.79777	9.79131	9.89512	588.673	-0.0854602
ENSMUSG00000005204	Senp3	6.7227	6.68184	6.54988	6.66483	6.66363	6.50899	6.32271	6.43838	6.41005	6.3209	6.37488	6.78494	6.43491	6.53865	6.34337	6.37727	6.49978	6.44195	7.16776	7.19939	7.22229	7.26155	7.2848	7.11756	7.26018	7.32294	7.2944	7.49044	7.41597	7.27292	7.27094	7.27939	7.26715	7.26267	6.65148	6.61248	6.39038	6.49357	6.48678	6.40681	7.19648	7.2213	7.29251	7.39311	7.27516	7.26491	99.8926	-0.115924
ENSMUSG00000005225	Plekha8	3.74115	3.80547	3.71169	3.89772	3.71546	3.75049	3.30751	3.35369	3.51011	3.33476	3.36579	3.49925	3.44537	3.46415	3.4898	3.45958	3.44953	3.48754	3.93195	3.90976	3.93788	3.95697	3.9499	3.94239	4.07981	4.0108	4.02316	4.09293	4.10356	4.06197	4.0507	4.08652	4.0408	4.07453	3.75277	3.78789	3.39044	3.39993	3.45476	3.4663	3.92653	3.94975	4.03792	4.08615	4.06861	4.05766	15.351	0.339089
ENSMUSG00000005237	Dnah2	2.1956	2.18703	2.18351	2.28327	2.21766	2.20267	NA	NA	NA	NA	NA	NA	NA	NA	NA	NA	NA	NA	1.93532	1.96043	1.9399	1.96542	1.95845	1.96352	2.1609	2.14127	2.1329	2.12799	2.15086	2.14637	2.31115	2.32426	2.33461	2.35088	2.18871	2.23453	NA	NA	NA	NA	1.94521	1.96246	2.14502	2.14174	2.3177	2.34275	5.56518	1.12986
ENSMUSG00000005262	Ufd1	8.19006	8.24989	8.23085	8.23392	8.06666	8.18638	8.13435	7.87806	8.21889	8.20093	8.11047	8.13279	7.97116	8.02249	8.0127	8.02055	7.89424	7.89075	8.91834	8.67505	8.76051	8.70632	8.7354	8.79528	9.01484	8.99972	9.0417	8.84112	8.89276	9.00549	9.02711	9.05685	9.09541	8.99236	8.2236	8.16232	8.0771	8.14806	7.99682	7.97583	8.78463	8.74567	9.01876	8.91312	9.04198	9.04388	293.802	-0.118393
ENSMUSG00000005267	Zfp287	5.64867	5.52275	5.54415	5.62973	5.53509	5.60852	5.42615	5.27194	5.48652	5.43088	5.37851	5.51128	5.57936	5.50977	5.42022	5.41486	5.52162	5.30461	6.06128	6.01131	5.96289	6.0993	6.11794	6.1515	6.25029	6.40891	6.26979	6.29623	6.32488	6.38039	6.43134	6.40717	6.42675	6.56563	5.57186	5.59111	5.39487	5.44022	5.54457	5.45223	6.01183	6.12291	6.30966	6.33383	6.41926	6.49619	48.5985	0.0590019
ENSMUSG00000005268	Prlr	2.29876	2.29208	2.36869	2.41143	2.29947	2.38621	NA	NA	NA	NA	NA	NA	2.48612	2.51332	2.44757	2.47451	2.48383	2.48723	2.31606	2.33288	2.31237	2.32198	2.3272	2.29404	3.02025	2.98935	2.95379	3.01525	2.99339	2.99811	3.31628	3.33287	3.32841	3.34253	2.31984	2.3657	NA	NA	2.49972	2.46864	2.32044	2.31441	2.9878	3.00225	3.32457	3.33547	6.116	1.07784
ENSMUSG00000005299	Letm1	8.2596	8.26542	8.18311	8.26859	8.27697	8.10529	8.11303	8.33298	8.20971	8.1429	8.19219	8.31941	8.10892	8.12776	8.13689	8.19006	8.15328	8.18921	8.8913	8.83749	8.92302	8.87815	8.82495	8.88587	8.9794	8.93176	8.95205	8.99711	9.02696	8.99192	9.00339	9.06992	9.06943	9.11104	8.23604	8.21695	8.21858	8.21817	8.11834	8.16008	8.88393	8.86299	8.9544	9.00533	9.03666	9.09023	300.61	-0.0405533
ENSMUSG00000005312	Ubqln1	10.4441	10.4247	10.5227	10.7451	10.4563	10.5188	10.3256	10.2598	10.3082	10.3023	10.3145	10.4315	10.3544	10.2133	10.2691	10.2576	10.2131	10.2751	11.0283	10.9894	11.0662	11.0283	10.9617	11.0034	11.1029	11.146	11.1306	11.0381	11.1095	11.0184	11.0533	11.1221	11.0808	10.9653	10.4638	10.5734	10.2978	10.3494	10.2839	10.2466	11.028	10.9978	11.1265	11.0554	11.0877	11.023	1477.84	0.159208
ENSMUSG00000005338	Cadm3	12.0545	12.0701	12.0834	11.9765	12.0514	12.1422	11.9976	12.0975	11.9456	12.0532	12.0747	11.9178	11.7887	11.7735	11.8196	11.8306	11.8449	11.7578	12.6972	12.5905	12.6837	12.5632	12.6048	12.6001	12.801	12.7231	12.8715	12.8168	12.7706	12.7552	12.6695	12.693	12.5962	12.6079	12.0693	12.0567	12.0136	12.0152	11.7811	11.8317	12.6571	12.5894	12.7985	12.7809	12.6812	12.602	4282.15	-0.0122556
ENSMUSG00000005354	Txn2	8.29897	8.253	8.25115	8.22581	8.17566	8.36482	8.07424	8.10326	8.08327	8.10168	8.1468	8.18754	7.98415	7.93096	8.06978	7.9666	7.93354	8.0119	8.8399	8.8284	8.96305	8.77398	8.76645	8.78805	8.83583	8.94881	8.95816	8.9077	8.92745	8.80011	8.97645	8.93412	8.95705	8.98128	8.26771	8.25543	8.08692	8.14534	7.95756	7.98998	8.87712	8.77616	8.91427	8.87842	8.95529	8.96917	306.962	-0.0114779
ENSMUSG00000005357	Slc1a6	5.80699	5.87599	5.71292	5.80713	5.7442	5.84141	5.6494	5.70537	5.64935	5.66322	5.96619	5.7469	5.31464	5.28059	5.38041	5.28854	5.23218	5.25757	6.37366	6.29144	6.33879	6.34945	6.30055	6.2603	6.44976	6.36334	6.50122	6.47584	6.46134	6.38723	6.40438	6.34875	6.33017	6.38538	5.79864	5.79758	5.66804	5.7921	5.29761	5.30037	6.33463	6.30343	6.4381	6.44147	6.37656	6.35778	55.7288	-0.0160779
ENSMUSG00000005360	Slc1a3	7.80225	7.51874	7.59352	7.99953	7.59227	7.74234	8.54277	8.13366	8.37893	7.96497	8.26309	9.13594	7.41317	7.42261	7.27796	7.58771	7.35638	7.3776	8.5369	8.404	8.3714	8.28147	8.24978	8.54625	8.96605	9.22283	9.0864	9.23392	9.06344	9.14035	9.22384	9.10437	9.46104	9.59763	7.63817	7.77804	8.35179	8.45467	7.41789	7.40735	8.43744	8.35917	9.09176	9.14591	9.16411	9.52934	216.124	0.261814
ENSMUSG00000005362	Crbn	9.03041	9.121	9.06736	9.42929	9.00436	9.07963	9.01819	8.5838	8.84088	8.93988	8.82948	8.76531	9.03501	8.97325	8.91917	8.94927	8.90152	8.86253	9.68587	9.56086	9.54931	9.63378	9.57728	9.73334	9.82683	9.74758	9.71408	9.56291	9.63214	9.83798	9.71046	9.60298	9.53869	9.41446	9.07292	9.1711	8.81429	8.84489	9.00413	8.92332	9.59868	9.64813	9.76283	9.67768	9.65672	9.47658	566.921	0.15971
ENSMUSG00000005370	Msh6	7.09308	7.09375	7.10756	7.10969	7.06118	6.95221	6.85413	6.70756	6.81463	6.82946	6.63387	6.85335	6.63664	6.82224	6.76209	6.74428	6.78745	6.69149	7.37815	7.3884	7.38109	7.46938	7.50443	7.45826	7.71339	7.59327	7.59969	7.55029	7.56197	7.6718	7.49843	7.47194	7.47494	7.62618	7.09813	7.04103	6.79211	6.77223	6.72944	6.76461	7.38255	7.47736	7.63545	7.59469	7.48518	7.55056	135.211	-0.140864
ENSMUSG00000005371	Fbxo11	10.0807	10.0866	10.1398	10.0865	10.0983	10.1173	9.92899	9.47184	9.95359	9.93896	9.76186	9.89496	10.0595	9.94521	9.81672	9.93844	9.93208	9.6693	10.62	10.5029	10.5554	10.5244	10.5134	10.5548	10.7672	10.6545	10.6503	10.5065	10.5927	10.6505	10.6344	10.6992	10.4045	10.4225	10.1024	10.1007	9.78481	9.86526	10.0024	9.89575	10.5595	10.5309	10.6907	10.5832	10.6668	10.4135	1098.77	-0.000531054
ENSMUSG00000005374	Tbl2	6.26556	6.2768	6.1399	6.09698	6.19101	6.2859	6.15404	6.47624	6.30317	6.2078	6.1303	6.36697	6.15578	6.07042	6.22461	6.16116	6.23631	6.24465	6.73411	6.67542	6.73178	6.67268	6.69454	6.64848	6.81426	6.79861	6.80016	6.88199	6.86025	6.82827	6.96495	6.9549	6.97821	7.07737	6.22742	6.1913	6.31115	6.23502	6.1131	6.20736	6.71377	6.6719	6.80435	6.85684	6.95992	7.02779	72.6976	-0.0886588
ENSMUSG00000005378	Bud23	6.12366	6.039	5.91072	5.74472	5.93718	6.01205	5.87107	6.16917	5.90896	5.98396	5.92524	5.89036	6.01979	5.78953	5.9342	5.89964	5.8352	5.80928	6.6064	6.68785	6.77785	6.72615	6.69893	6.59544	6.72196	6.74203	6.84242	6.80388	6.78773	6.70014	6.85529	6.82183	6.86974	6.91805	6.02446	5.89798	5.98306	5.93318	5.90466	5.88968	6.6907	6.6735	6.76881	6.76392	6.83856	6.8939	60.2275	-0.397248
ENSMUSG00000005397	Nid1	NA	NA	NA	NA	NA	NA	2.59322	2.45513	2.45237	2.45079	2.51463	2.64437	NA	NA	NA	NA	NA	NA	2.18034	2.1806	2.22166	2.17536	2.20735	2.2044	2.88295	2.86692	2.89666	2.91872	2.84781	2.84466	3.09973	3.11427	3.09748	3.13203	NA	NA	2.50024	2.5366	NA	NA	2.1942	2.1957	2.88218	2.8704	3.107	3.11475	NA	NA
ENSMUSG00000005410	Mcm5	5.59286	5.41503	5.37653	5.35003	5.57801	5.45846	5.37656	5.51612	5.48395	5.4087	5.37715	5.32627	5.30632	5.30203	5.24487	5.2497	5.2964	5.38212	6.01894	5.99929	6.01113	6.01891	5.97715	5.96375	6.09605	6.07693	6.14243	6.1367	6.11315	6.06799	6.26413	6.188	6.14551	6.15861	5.46147	5.46216	5.45888	5.37071	5.30417	5.26366	6.00978	5.9866	6.10514	6.10595	6.22606	6.15206	42.9683	0.0127156
ENSMUSG00000005413	Hmox1	3.70246	3.7185	3.6904	3.7759	3.68708	3.71935	3.97827	3.86169	4.0971	3.95131	3.94278	3.98553	3.48622	3.5553	3.61541	3.61971	3.56879	3.5858	4.23487	4.17741	4.16918	4.15362	4.17077	4.20526	4.56299	4.5601	4.5242	4.5916	4.59847	4.60867	4.92169	4.95301	4.98708	5.022	3.70379	3.72745	3.97902	3.95987	3.52076	3.6013	4.19382	4.17655	4.5491	4.59958	4.93735	5.00454	13.9101	0.217121
ENSMUSG00000005417	Mprip	8.62954	8.40015	8.22392	8.49331	8.43166	8.22199	8.37172	8.83159	8.57897	8.23188	8.35436	8.47797	8.72358	8.76441	8.52331	8.49583	8.73293	8.78212	9.18952	9.49577	9.04444	9.40598	9.39981	9.50081	9.18935	9.39612	9.09676	9.2152	9.08502	9.36777	9.57155	9.17471	9.76246	9.57337	8.41787	8.38232	8.5941	8.35474	8.744	8.58403	9.24324	9.43553	9.22741	9.22266	9.37313	9.66791	342.445	-0.0837037
ENSMUSG00000005442	Cic	8.08031	8.03099	7.87277	7.89048	8.08306	7.92568	7.66038	8.06666	7.796	7.69392	7.79725	7.90107	7.74511	7.80589	7.75529	7.73813	7.70562	7.98848	8.44225	8.53705	8.58826	8.47736	8.56383	8.49399	8.58697	8.65159	8.75711	8.77649	8.66172	8.58918	8.62446	8.64711	8.7536	8.62883	7.99469	7.96641	7.84101	7.79741	7.7755	7.73301	8.52252	8.51173	8.66522	8.67579	8.63579	8.69122	252.258	-0.0450242
ENSMUSG00000005447	Pafah1b3	5.74472	5.91526	5.86569	5.85874	5.89697	5.89052	5.86344	5.77579	5.80163	5.864	5.8196	5.92026	5.72539	5.8034	5.7612	5.91464	5.78781	5.78687	6.6716	6.66668	6.68676	6.62111	6.62993	6.59547	6.75665	6.81463	6.70405	6.63854	6.7514	6.67062	6.75845	6.76216	6.76648	6.71135	5.84189	5.88207	5.81362	5.86795	5.76439	5.82122	6.67501	6.6155	6.75844	6.68685	6.7603	6.73891	58.2891	0.134246
ENSMUSG00000005469	Prkaca	9.79183	9.76739	9.76258	9.57319	9.74834	9.72836	9.5518	9.65472	9.58798	9.59401	9.63785	9.41039	9.50344	9.54029	9.56935	9.56912	9.70341	9.57481	10.283	10.2058	10.2959	10.3692	10.3849	10.2672	10.4095	10.4137	10.3936	10.4465	10.4241	10.4919	10.4394	10.4179	10.4321	10.4679	9.77394	9.6833	9.59817	9.54742	9.52187	9.61396	10.2615	10.3404	10.4056	10.4542	10.4287	10.45	848.395	-0.121788
ENSMUSG00000005481	Ddx39	5.27491	5.27082	5.19184	5.26097	5.20828	5.21763	4.7953	4.96095	4.97593	4.89837	4.96641	4.79074	4.88706	4.93887	4.92943	4.89517	4.91649	5.07271	5.82817	5.78304	5.80032	5.84926	5.72725	5.73319	6.03234	5.98882	6.03718	5.99239	5.99827	6.01704	5.76785	5.83892	5.75425	5.78045	5.24585	5.22896	4.91073	4.88517	4.91297	4.9137	5.80384	5.7699	6.01944	6.00257	5.80338	5.76735	37.9837	-0.0940576
ENSMUSG00000005483	Dnajb1	8.08008	8.08763	7.94142	8.04065	7.98687	7.97108	7.7508	8.07819	8.06622	7.8824	7.96398	8.52645	7.93873	7.80635	8.05797	7.91817	7.95923	7.89014	8.54658	8.55747	8.49039	8.54397	8.59534	8.59053	8.62388	8.59941	8.59256	8.63243	8.69657	8.60176	8.80877	8.88332	8.80816	8.79699	8.03638	7.99954	7.96507	8.12428	7.87254	7.97846	8.53148	8.57662	8.60528	8.64358	8.84604	8.80257	259.767	-0.082148
ENSMUSG00000005501	Usp40	2.55245	2.54216	2.55603	2.51817	2.57918	2.58114	3.10677	2.93688	3.06407	3.04731	2.93239	3.04606	3.20149	3.1815	3.2018	3.18696	3.16934	3.129	3.61123	3.61995	3.61411	3.63368	3.5691	3.62993	3.82562	3.79085	3.80299	3.82176	3.87485	3.9318	3.35517	3.31106	3.31093	3.31274	2.55021	2.5595	3.03591	3.00859	3.19149	3.18604	3.6151	3.6109	3.80649	3.87614	3.33312	3.31183	5.42012	0.237274
ENSMUSG00000005505	Kbtbd4	7.21683	7.35894	7.22315	7.2076	7.39168	7.16269	7.1094	7.00226	7.05994	7.10754	7.01347	7.30007	6.79444	6.98925	6.95271	6.99224	6.83366	6.86747	7.73088	7.72064	7.70654	7.64399	7.79046	7.74167	7.78531	7.86351	7.82016	7.75126	7.66283	7.77319	7.85471	7.80813	7.83696	7.8646	7.26631	7.25399	7.0572	7.14036	6.89185	6.9262	7.71935	7.72537	7.82299	7.72909	7.83142	7.85078	153.24	-0.0149021
ENSMUSG00000005506	Celf1	9.9804	10.0167	9.93926	10.1055	9.98275	9.99688	9.74636	9.69085	9.76403	9.83036	9.76661	9.71823	9.75581	9.80321	9.83961	9.77793	9.73304	9.69477	10.5235	10.4138	10.4223	10.5201	10.5206	10.4346	10.6478	10.5993	10.6528	10.5459	10.6455	10.5838	10.5502	10.6099	10.6048	10.4895	9.97877	10.0284	9.73375	9.77174	9.77951	9.78353	10.4532	10.4918	10.6333	10.5917	10.5801	10.5471	1028.97	0.0665261
ENSMUSG00000005510	Ndufs3	8.49972	8.35977	8.37681	8.94062	8.19903	8.39176	8.00349	8.0135	8.11624	8.00192	8.07574	7.98921	7.89972	8.02879	8.25961	8.00719	7.9042	8.15739	8.83952	8.67685	8.98882	8.71854	8.67877	8.71189	8.76731	8.84615	8.88741	8.72056	8.92958	8.81328	8.99469	9.03063	9.03567	9.12718	8.4121	8.51047	8.04441	8.02229	7.96425	8.057	8.83507	8.70306	8.83362	8.82114	9.01266	9.08142	369.356	0.262565
ENSMUSG00000005514	Por	8.41204	8.40943	8.34791	8.28576	8.43464	8.37241	8.29244	8.63281	8.40447	8.29044	8.26587	8.51733	8.26164	8.2775	8.37643	8.27939	8.3777	8.36607	9.02524	9.01767	9.02208	9.08376	9.04511	9.02024	9.17991	9.24983	9.14303	9.16332	9.18415	9.10944	9.29508	9.18697	9.41892	9.43571	8.38979	8.36427	8.44324	8.35788	8.26957	8.34451	9.02166	9.0497	9.19092	9.1523	9.24103	9.42732	331.62	-0.0305232
ENSMUSG00000005533	Igf1r	7.88164	7.7831	7.78981	7.85326	7.8394	7.68274	7.67258	7.87157	7.79812	7.58594	7.67185	7.74712	7.62492	7.53456	7.48014	7.64157	7.43013	7.53909	8.35505	8.51389	8.37371	8.46746	8.62461	8.51403	8.79579	8.66686	8.62613	8.73727	8.66624	8.67378	8.71451	8.70208	8.74865	8.72315	7.81818	7.7918	7.78076	7.6683	7.57974	7.51728	8.41421	8.53537	8.69626	8.69243	8.70829	8.7359	224.803	-0.0591725
ENSMUSG00000005534	Insr	7.96626	7.76008	7.74524	7.87496	7.9	7.81342	7.51187	7.74457	7.5945	7.59292	7.69218	7.54735	7.44988	7.51184	7.53605	7.48275	7.51324	7.45787	8.43466	8.51868	8.40794	8.42026	8.50165	8.42164	8.56402	8.51081	8.61724	8.66539	8.5718	8.52884	8.54704	8.56252	8.54493	8.65692	7.82386	7.86279	7.61698	7.61082	7.48086	7.51068	8.45376	8.44785	8.56403	8.58868	8.55478	8.60092	230.738	0.0615622
ENSMUSG00000005566	Trim28	9.18149	9.16834	9.06187	9.12532	9.17019	9.10038	8.89676	9.03992	8.97699	8.88802	8.95533	8.90285	8.89545	8.88443	9.01243	8.90898	9.01602	8.95143	9.57053	9.68375	9.77678	9.64395	9.72675	9.67229	9.67063	9.78137	9.80622	9.76216	9.75576	9.75803	9.71589	9.76082	9.85002	9.90679	9.13723	9.13196	8.97122	8.9154	8.88994	8.97914	9.67702	9.68099	9.75274	9.75865	9.73835	9.87841	562.288	-0.0109832
ENSMUSG00000005575	Ube2m	9.46141	9.52887	9.60079	9.40607	9.52796	9.55986	9.40927	9.33967	9.25984	9.41957	9.50621	9.21403	9.11945	9.36526	9.36359	9.33801	9.27275	9.33817	10.1145	10.1083	10.1465	10.0748	10.0614	10.048	10.2655	10.1804	10.3082	10.1283	10.1907	10.1713	10.0672	10.1523	10.0119	9.98188	9.53036	9.49797	9.33626	9.37993	9.24235	9.32478	10.1231	10.0614	10.2514	10.1634	10.1097	9.99688	731.352	-0.0376736
ENSMUSG00000005580	Adcy9	8.69024	8.68889	8.52331	8.47155	8.81047	8.58236	8.30273	8.79663	8.50613	8.39782	8.48847	8.64115	8.37702	8.3049	8.36848	8.43026	8.34015	8.24958	9.23402	9.19018	9.14447	9.16933	9.20287	9.26343	9.37897	9.28453	9.42171	9.44761	9.28392	9.31405	9.29522	9.2375	9.31505	9.42464	8.63415	8.62146	8.53516	8.50914	8.34096	8.37963	9.18956	9.21188	9.36174	9.34853	9.26636	9.36985	395.967	0.00117595
ENSMUSG00000005583	Mef2c	12.0762	12.0689	12.1807	11.9334	12.1318	12.1281	12.0042	11.9028	11.8799	12.0617	11.9833	11.8487	11.9986	11.9149	11.9565	12.0107	11.9577	11.9093	12.6374	12.6836	12.6398	12.5624	12.6517	12.6328	12.7419	12.6175	12.6872	12.6495	12.598	12.684	12.5561	12.5808	12.5659	12.4281	12.1086	12.0644	11.929	11.9646	11.9567	11.975	12.6536	12.6156	12.6822	12.6438	12.5684	12.497	4358.3	-0.0545515
ENSMUSG00000005609	Ctr9	8.10663	8.22416	8.16698	8.06936	8.2603	8.12877	8.01724	7.96223	8.04299	8.03323	7.8249	8.02287	8.18927	7.99666	7.92461	8.02892	8.01564	7.86411	8.68323	8.60383	8.55599	8.65637	8.61022	8.70152	8.89937	8.80528	8.73291	8.64088	8.73235	8.83013	8.9116	8.79324	8.71262	8.72858	8.16592	8.15281	8.00749	7.96034	8.09297	7.98972	8.61435	8.65604	8.81252	8.73445	8.85242	8.7206	285.407	-0.00744767
ENSMUSG00000005610	Eif4g2	10.4854	10.6213	10.7326	10.877	10.6286	10.784	10.654	10.4101	10.5087	10.6499	10.6491	10.6206	10.5766	10.5102	10.5252	10.4277	10.5389	10.5517	11.2814	11.2954	11.3197	11.1564	11.078	11.2011	11.5625	11.2665	11.5628	11.3222	11.4371	11.4238	11.1743	11.3934	10.8006	10.8228	10.6131	10.7632	10.5243	10.6399	10.5434	10.4973	11.2988	11.1452	11.4639	11.3944	11.2839	10.8117	1664.05	0.21257
ENSMUSG00000005615	Pcyt1a	5.97971	5.84826	5.96224	6.11408	5.8568	5.87205	5.48386	5.46158	5.53571	5.50451	5.43806	5.51668	5.66812	5.5015	5.5544	5.62504	5.59377	5.54818	6.3406	6.21917	6.16082	6.25595	6.249	6.34002	6.37567	6.32932	6.40846	6.29188	6.42824	6.32398	6.54656	6.55355	6.44675	6.53448	5.93007	5.94764	5.49372	5.48642	5.58481	5.59107	6.24019	6.28166	6.37115	6.34803	6.55005	6.49062	64.2888	0.042296
ENSMUSG00000005621	Zfp592	5.7785	5.78864	5.77337	5.67835	5.83517	5.83441	5.90351	5.73238	5.95985	5.77533	5.84	6.1442	5.96013	5.97763	5.99958	5.90103	6.09953	5.9471	6.63609	6.7111	6.62728	6.75656	6.6425	6.74944	6.68252	6.65752	6.55838	6.67037	6.66144	6.69448	6.72338	6.84542	6.84731	6.75714	5.78017	5.78264	5.86525	5.91984	5.96888	6.00005	6.65816	6.71616	6.6328	6.67543	6.7844	6.80223	53.7926	0.0417373
ENSMUSG00000005625	Psmd4	8.94174	8.90083	9.01496	8.58375	8.83184	8.97367	8.8611	9.08095	8.96152	8.82085	8.89659	8.74107	8.81216	8.72079	8.75571	8.79844	8.75338	8.87669	9.59426	9.53544	9.61165	9.61219	9.54366	9.56971	9.51761	9.64792	9.58428	9.57295	9.66204	9.5456	9.72175	9.69112	9.76478	9.85782	8.95251	8.79642	8.96786	8.8195	8.76648	8.76918	9.58045	9.57518	9.58327	9.59353	9.70644	9.8113	470.271	-0.217553
ENSMUSG00000005656	Snx6	7.42256	7.511	7.52894	7.74673	7.48126	7.60552	7.43685	7.14396	7.37472	7.42303	7.40421	7.32301	7.40229	7.37482	7.29837	7.30408	7.33703	7.26065	7.85244	7.99979	8.00756	7.89666	7.81248	8.01341	8.21358	8.26523	8.12162	8.02747	8.12156	8.25532	8.0369	8.06328	7.98239	8.06634	7.4875	7.61117	7.31851	7.38341	7.38856	7.31316	7.95326	7.90751	8.20014	8.13478	8.05009	8.02437	191.145	0.234378
ENSMUSG00000005667	Mthfd2	3.6366	3.58314	3.66123	3.65915	3.66454	3.64514	3.66552	3.55744	3.81741	3.68744	3.71681	3.5358	3.59383	3.60218	3.55807	3.60139	3.64824	3.55069	4.36453	4.35851	4.33237	4.41905	4.35992	4.36344	4.39676	4.43949	4.33628	4.34121	4.41956	4.47247	3.95825	3.96288	3.97499	4.00932	3.62699	3.65628	3.68012	3.64669	3.59801	3.60256	4.3518	4.3808	4.39084	4.41108	3.96057	3.99216	12.8087	0.311873
ENSMUSG00000005672	Kit	7.02999	6.87519	7.10131	7.05772	6.95144	6.93257	6.80834	6.72902	6.53146	6.76333	6.60892	6.57034	6.60177	6.53563	6.56352	6.61864	6.56502	6.45165	7.39732	7.31098	7.66702	7.48039	7.37104	7.54103	7.69189	7.65186	7.88446	7.9241	7.80587	7.68529	7.69142	7.71263	7.68332	7.708	7.00217	6.98058	6.68961	6.64753	6.5687	6.58239	7.45844	7.46415	7.74274	7.80509	7.70202	7.69566	128.939	-0.0661864
ENSMUSG00000005674	Tomm40l	5.93023	5.86356	6.08542	5.7732	5.84298	5.89443	5.93484	6.21353	6.15114	5.97968	5.94082	6.16449	5.77035	5.69704	5.81984	5.67134	5.73662	5.98793	6.6167	6.65687	6.66394	6.65547	6.73065	6.54881	6.76546	6.81679	6.72187	6.81746	6.82863	6.77353	6.74848	6.72837	6.77156	6.77904	5.95974	5.83687	6.09984	6.02833	5.73369	5.7426	6.64584	6.64498	6.76804	6.80654	6.73843	6.7753	59.007	-0.40364
ENSMUSG00000005682	Pan2	4.97171	4.87355	4.94686	4.88918	4.97008	4.9351	4.62723	4.67844	4.4892	4.46992	4.65064	4.65683	4.68439	4.74992	4.71762	4.6523	4.67413	4.77137	5.56868	5.55305	5.47958	5.51206	5.49281	5.51836	5.52291	5.46556	5.48873	5.44002	5.5296	5.56738	5.63565	5.65376	5.71591	5.72788	4.93071	4.93145	4.59829	4.59247	4.71716	4.68135	5.53377	5.50775	5.4924	5.51233	5.6447	5.7219	30.0888	0.0185056
ENSMUSG00000005683	Cs	9.86331	9.85347	9.94337	9.87556	9.79517	9.92798	9.85934	9.72674	9.69906	9.85823	9.6912	9.75514	9.54711	9.5659	9.60311	9.64231	9.58612	9.57059	10.3728	10.3911	10.3852	10.4099	10.3904	10.4187	10.416	10.6509	10.4593	10.4114	10.3321	10.5182	10.4429	10.4312	10.6213	10.485	9.88672	9.86624	9.76171	9.76819	9.5565	9.61051	10.383	10.4063	10.5087	10.4206	10.437	10.5531	941.126	-0.0292454
ENSMUSG00000005686	Ampd3	4.72046	4.66552	4.72824	4.70842	4.7103	4.69158	4.40627	4.49368	4.5356	4.47568	4.39304	4.41111	4.44816	4.53248	4.431	4.50357	4.46563	4.55368	5.3635	5.37266	5.3755	5.3082	5.33822	5.39561	5.63971	5.78326	5.75546	5.8462	5.7374	5.82189	5.55933	5.57969	5.60135	5.55484	4.70474	4.70343	4.47852	4.42661	4.49032	4.46674	5.37055	5.34734	5.72614	5.80183	5.56951	5.5781	26.2113	-0.00831694
ENSMUSG00000005687	Bcas2	7.94087	7.9823	8.09274	7.93295	7.87187	8.18714	7.8809	7.74717	7.79772	7.79528	7.89341	7.44109	8.07896	7.84966	7.9066	8.01276	7.87958	7.86056	8.70848	8.73014	8.7188	8.67452	8.49181	8.61544	8.68396	8.76864	8.66125	8.73908	8.82874	8.7666	8.7904	8.85593	8.75904	8.73098	8.0053	7.99732	7.8086	7.70993	7.96431	7.93298	8.71914	8.59393	8.70462	8.77814	8.82316	8.74501	257.177	0.00959672
ENSMUSG00000005698	Ctcf	8.24779	8.3315	8.42786	8.38112	8.48611	8.50891	8.26163	8.16054	8.33695	8.18878	8.24613	8.49868	8.49078	8.25747	8.23359	8.23552	8.34584	8.35585	8.95028	9.01761	9.03888	8.85813	8.90482	8.91797	9.03301	8.95624	9.00026	8.93656	9.05444	9.04222	8.88821	9.01347	8.8215	8.90684	8.33572	8.45871	8.25304	8.3112	8.37412	8.27165	9.00226	8.89364	8.9965	9.01107	8.95084	8.86417	338.428	0.224164
ENSMUSG00000005699	Pard6a	5.11926	5.00259	4.93741	4.78021	4.88614	5.01809	4.90264	5.19429	5.03509	4.96832	5.04132	5.04776	4.9125	4.80597	4.93613	4.8444	4.7241	4.87354	5.59212	5.63976	5.67559	5.66955	5.58958	5.63485	5.5922	5.6011	5.58337	5.63984	5.65084	5.66229	5.88852	5.90221	5.88006	5.97336	5.01975	4.89481	5.04401	5.01913	4.85923	4.83488	5.63583	5.63133	5.59222	5.65099	5.89536	5.92671	29.2814	-0.657377
ENSMUSG00000005716	Pvalb	4.5187	4.5662	4.57395	4.70168	4.52216	4.71697	4.60685	4.82022	4.54813	4.53125	4.57423	4.42799	4.567	4.54457	4.55156	4.51002	4.58871	4.69481	5.94179	5.79558	5.85718	5.9001	5.85735	5.74549	5.89446	6.13533	5.87574	6.13248	6.0427	6.09494	6.48618	6.38419	6.5465	6.46691	4.55295	4.64694	4.6584	4.51116	4.55579	4.5501	5.86485	5.83432	5.96851	6.09004	6.43518	6.5067	25.8227	0.581878
ENSMUSG00000005718	Tfap4	2.40446	2.43431	2.39368	2.41459	2.34755	2.40055	2.45136	2.51257	2.51968	2.48031	2.56875	2.56676	2.43492	2.40938	2.3976	2.37164	2.40271	2.37079	3.14738	3.16407	3.16115	3.17504	3.13115	3.12582	3.82384	3.82007	3.80684	3.73969	3.78109	3.80941	4.00204	3.97994	3.98982	3.97604	2.41082	2.38756	2.49454	2.53861	2.42215	2.39065	3.15753	3.144	3.81691	3.77673	3.99099	3.98293	5.47498	-0.583053
ENSMUSG00000005732	Ranbp1	8.77753	8.74339	8.79293	8.52721	8.74783	8.85779	8.84082	8.65382	8.82716	8.80749	8.71169	8.69956	8.69799	8.52533	8.53254	8.71875	8.5842	8.57108	9.33468	9.32285	9.26919	9.30232	9.09365	9.28153	9.34567	9.20241	9.33792	9.19034	9.25963	9.27935	9.32109	9.37242	9.29553	9.26673	8.77128	8.71094	8.77393	8.73958	8.61166	8.61183	9.3089	9.22584	9.29533	9.24311	9.34676	9.28113	427.383	-0.0659446
ENSMUSG00000005774	Rfx5	4.74438	4.75557	4.746	4.75072	4.72648	4.78468	4.87371	4.80753	4.89659	4.80792	5.00615	4.79272	4.80687	4.78736	4.81405	4.81927	4.76004	5.00836	5.57189	5.61278	5.60757	5.59482	5.52927	5.59658	5.79436	5.63548	5.70608	5.76418	5.67164	5.62982	5.57364	5.55137	5.54994	5.57314	4.74865	4.75396	4.85928	4.86893	4.79712	4.79778	5.59741	5.57356	5.71197	5.68855	5.56251	5.56154	26.9214	0.0334282
ENSMUSG00000005779	Psmb4	9.67578	9.60967	9.58925	9.85074	9.5908	9.61266	9.46114	9.59928	9.53508	9.51834	9.65142	9.47577	9.30082	9.37756	9.4445	9.37729	9.44217	9.40389	10.1982	10.1435	10.2549	10.1874	10.2085	10.1492	10.27	10.3751	10.4532	10.3316	10.3364	10.3026	10.3248	10.3223	10.3939	10.4132	9.6249	9.68473	9.53183	9.54851	9.33919	9.42132	10.1989	10.1817	10.3661	10.3235	10.3235	10.4035	811.855	0.0840588
ENSMUSG00000005802	Slc30a4	7.4957	7.48825	7.43645	7.53794	7.58739	7.62276	7.24064	7.08771	7.3705	7.30421	7.3193	7.29011	7.22365	7.31784	7.18004	7.41083	7.33051	7.10981	8.13135	8.03919	8.15532	8.10256	8.21882	8.18555	8.25906	8.22487	8.14233	8.20174	8.156	8.16529	8.12608	8.26787	8.03634	8.04409	7.47347	7.5827	7.23295	7.30454	7.27074	7.30713	8.10862	8.16898	8.20876	8.17435	8.19697	8.04021	184.979	0.227027
ENSMUSG00000005803	Sqor	NA	NA	NA	NA	NA	NA	NA	NA	NA	NA	NA	NA	NA	NA	NA	NA	NA	NA	NA	NA	NA	NA	NA	NA	2.0503	2.05523	2.09467	2.07792	2.04066	2.06979	2.55047	2.57891	2.60449	2.56728	NA	NA	NA	NA	NA	NA	NA	NA	2.06673	2.06279	2.56469	2.58589	NA	NA
ENSMUSG00000005804	Bloc1s6	6.71006	6.73862	6.89382	6.9522	6.89969	6.81666	6.78785	6.75194	6.75842	6.81995	6.78077	6.56033	6.65479	6.55874	6.50199	6.58487	6.52353	6.58605	7.46221	7.3328	7.43732	7.33976	7.2954	7.37209	7.37223	7.33165	7.30773	7.31735	7.37358	7.32679	7.33437	7.29797	7.29179	7.29415	6.78083	6.88952	6.76607	6.72035	6.60677	6.53679	7.41078	7.33575	7.3372	7.33924	7.31617	7.29297	116.538	0.250219
ENSMUSG00000005813	Metap1	7.85592	7.84915	7.85502	7.67717	7.7264	7.83843	7.55379	7.62618	7.74986	7.73155	7.579	7.7953	7.63401	7.61558	7.78386	7.67203	7.71498	7.603	8.33126	8.2977	8.26768	8.27311	8.24909	8.14869	8.48812	8.47771	8.48412	8.46931	8.52051	8.50345	8.42976	8.57983	8.4986	8.54204	7.85336	7.74733	7.64328	7.70195	7.6248	7.72362	8.29888	8.22363	8.48332	8.49776	8.50479	8.52032	222.036	-0.183509
ENSMUSG00000005823	Gpr108	5.59008	5.56389	5.56945	5.4178	5.60237	5.50488	5.55536	5.57373	5.55514	5.48914	5.64742	5.60305	5.23323	5.30356	5.30501	5.29911	5.13806	5.24467	6.19159	6.17282	6.22093	6.0917	6.25498	6.22153	6.43284	6.41291	6.47027	6.58118	6.45926	6.42182	6.55142	6.60663	6.52655	6.57471	5.57447	5.50835	5.56141	5.57987	5.26839	5.24739	6.19511	6.18941	6.43867	6.48742	6.57902	6.55063	45.2385	-0.22808
ENSMUSG00000005846	Rsl1d1	8.8207	8.96851	9.04303	8.98312	8.9836	9.02031	8.84244	8.36772	8.61434	8.87452	8.65084	8.73116	8.86147	8.70548	8.6607	8.69794	8.71375	8.6353	9.30153	9.21241	9.27369	9.18767	9.08178	9.31564	9.57255	9.45352	9.51355	9.26912	9.3661	9.46729	9.33108	9.38153	9.19186	9.11133	8.94408	8.99568	8.60816	8.75217	8.78347	8.6908	9.26254	9.19503	9.51321	9.3675	9.3563	9.15159	502.958	0.0811476
ENSMUSG00000005871	Apc	10.1447	10.1705	10.214	10.2503	10.3073	10.1552	9.97087	9.52828	10.0097	9.94562	9.82388	9.97237	9.99615	10.0892	9.97681	9.88677	10.0957	9.98412	10.5442	10.7044	10.519	10.7195	10.629	10.7618	10.6477	10.5837	10.4883	10.4944	10.5118	10.6215	10.5503	10.4954	10.5514	10.4577	10.1764	10.2376	9.83628	9.91396	10.0427	9.98644	10.5892	10.7034	10.5732	10.5426	10.5228	10.5045	1184.36	0.0915913
ENSMUSG00000005873	Reep5	9.89277	9.94301	10.0003	9.65928	9.87865	10.0343	9.90062	10.0476	9.81412	9.85422	9.97923	9.82388	9.85828	9.6747	9.73381	9.75957	9.69881	9.82888	10.6347	10.5362	10.5866	10.5587	10.4619	10.5302	10.6456	10.584	10.6873	10.7851	10.7216	10.6098	10.5755	10.754	10.5717	10.5635	9.94536	9.8574	9.92079	9.88578	9.76649	9.73073	10.5858	10.5169	10.6389	10.7055	10.6647	10.5676	959.538	-0.105081
ENSMUSG00000005881	Ergic3	8.32596	8.38896	8.23277	8.44474	8.37533	8.41849	8.3088	8.49715	8.33729	8.28911	8.39745	8.33864	7.90936	8.09953	8.19813	8.0755	8.2056	8.15582	9.03834	8.95995	9.03445	8.90417	8.97913	8.93323	9.15516	9.05645	9.19717	9.1393	9.19824	9.08189	9.01372	9.03568	9.09464	9.08943	8.3159	8.41285	8.38108	8.34173	8.00444	8.15974	9.01091	8.93884	9.13626	9.13981	9.0247	9.09203	331.15	0.156393
ENSMUSG00000005882	Uqcc1	6.83645	6.63794	6.60151	6.76997	6.77004	6.68261	6.44132	6.52684	6.58968	6.33589	6.49101	6.2528	6.7118	6.60108	6.57644	6.64171	6.65416	6.6442	7.55975	7.44116	7.4916	7.49731	7.59303	7.47426	7.39295	7.45354	7.40154	7.58953	7.50947	7.47106	7.46641	7.60903	7.49663	7.57316	6.69197	6.74088	6.51928	6.3599	6.65644	6.6241	7.4975	7.52153	7.41601	7.52336	7.53772	7.5349	106.218	0.10225
ENSMUSG00000005886	Ncoa2	8.93344	8.92744	8.97127	8.43337	8.96603	8.83807	8.81695	8.7404	8.90416	8.79538	8.72769	8.88055	8.91917	8.87013	8.87054	8.88184	8.91722	8.85428	9.57736	9.71059	9.50216	9.74194	9.682	9.69149	9.7437	9.65057	9.53095	9.75659	9.68459	9.688	9.65658	9.63759	9.63373	9.67533	8.94405	8.74582	8.8205	8.80121	8.89465	8.88987	9.5967	9.70514	9.64174	9.70973	9.64709	9.65453	462.203	-0.272239
ENSMUSG00000005892	Trh	2.71966	2.80295	2.76832	2.73248	2.73879	2.74216	3.27134	3.18446	3.25694	3.10493	3.47053	3.26789	2.97844	2.93905	2.90888	2.89654	2.89116	3.05239	3.73999	3.63487	3.59829	3.62117	3.58549	3.69307	3.89569	3.84742	4.07669	3.96454	3.93949	4.00001	4.49148	4.47408	4.50122	4.57459	2.76365	2.73781	3.23758	3.28112	2.95874	2.89886	3.65772	3.63324	3.93993	3.96802	4.48278	4.5379	6.53778	-0.503816
ENSMUSG00000005893	Nr2c2	8.56457	8.56054	8.60666	8.63421	8.51888	8.61901	8.43483	8.40023	8.37568	8.44271	8.49472	8.2647	8.40583	8.42885	8.49481	8.50032	8.42607	8.63876	9.26727	9.35799	9.21204	9.2497	9.17711	9.34061	9.29337	9.27032	9.38309	9.35271	9.30693	9.2533	9.35063	9.22365	9.30024	9.28398	8.57725	8.5907	8.40358	8.40071	8.41734	8.47373	9.2791	9.2558	9.31559	9.30432	9.28714	9.29211	384.752	0.0183395
ENSMUSG00000005897	Nr2c1	5.65857	5.64348	5.67597	5.63708	5.6593	5.68643	5.38389	5.47592	5.29099	5.31526	5.45805	5.29031	5.54958	5.48673	5.29683	5.41299	5.39951	5.22429	6.23808	6.24223	6.1551	6.17275	6.19683	6.21044	6.34748	6.36372	6.19236	6.26138	6.20183	6.26726	6.25243	6.31856	6.22688	6.24312	5.65934	5.66093	5.3836	5.35454	5.51815	5.36978	6.2118	6.19334	6.30119	6.24349	6.2855	6.235	50.3179	0.0158821
ENSMUSG00000005899	Smpd4	6.74966	6.72322	6.81698	7.10566	6.88549	6.69523	6.34425	6.40441	6.16522	6.45547	6.42423	6.15069	6.38562	6.47727	6.42754	6.37723	6.28106	6.35722	7.2678	7.11662	7.21336	7.20628	7.20122	7.21441	7.23417	7.3126	7.43345	7.29737	7.1646	7.24409	7.17794	6.95434	7.29736	7.23944	6.76328	6.89546	6.30463	6.34347	6.43144	6.36194	7.19926	7.2073	7.32674	7.23535	7.06614	7.2684	119.078	0.319649
ENSMUSG00000005907	Pex1	6.05677	6.14814	6.04283	6.27472	6.07548	6.03054	5.53894	5.74641	5.65303	5.62652	5.62071	5.59855	5.87971	5.86943	5.90727	5.78047	5.90369	5.83637	6.53734	6.49959	6.48622	6.57957	6.57094	6.62038	6.72457	6.82083	6.59174	6.6497	6.74426	6.7386	6.566	6.56739	6.59288	6.48232	6.08258	6.12692	5.64613	5.61526	5.87457	5.86381	6.50771	6.5903	6.71238	6.71085	6.5667	6.5376	71.4004	0.113815
ENSMUSG00000005917	Otx1	3.68943	3.56412	3.6035	3.61434	3.61881	3.62493	3.85357	3.96848	3.7508	3.84894	3.93172	3.86216	2.8623	2.85201	2.87133	2.85782	2.88891	2.89391	4.2806	4.33436	4.3853	4.33213	4.26387	4.29664	4.42576	4.46756	4.53649	4.46176	4.38312	4.43	4.47054	4.50596	4.47757	4.39919	3.61901	3.61936	3.85762	3.88094	2.85716	2.87269	4.33342	4.29755	4.4766	4.42496	4.48825	4.43838	12.2749	-0.00859011
ENSMUSG00000005936	Kctd20	7.5152	7.68328	7.78039	7.73005	7.72304	7.43866	7.37742	7.06183	7.29788	7.51895	7.28198	7.62116	7.34105	7.48304	7.32406	7.31214	7.26073	7.34843	7.92275	7.73703	7.80523	7.71837	7.82139	7.82991	8.25006	8.2495	8.29936	8.05276	8.05267	8.33462	8.1143	8.16777	7.94181	7.90657	7.65962	7.63058	7.24571	7.47403	7.41205	7.29898	7.82167	7.78989	8.26631	8.14668	8.14104	7.92419	203.405	-0.0601019
ENSMUSG00000005949	Ctns	4.84657	4.94914	4.76816	4.89349	4.92218	4.94605	4.57394	4.47692	4.46293	4.52712	4.49265	4.44988	4.39387	4.4858	4.424	4.4461	4.45993	4.36223	5.38417	5.43197	5.41358	5.36663	5.34749	5.3569	5.79432	5.7112	5.78093	5.82975	5.81991	5.69337	5.56125	5.59267	5.57498	5.59904	4.85462	4.92057	4.5046	4.48989	4.43984	4.44335	5.40991	5.35701	5.76215	5.78101	5.57696	5.58701	29.6009	0.334824
ENSMUSG00000005951	Shpk	3.17345	3.16544	3.16421	3.44545	3.14154	3.1456	2.84792	2.89078	2.79106	2.93112	2.82035	2.85249	2.78708	2.78373	2.81673	2.85434	2.84404	2.85978	3.5002	3.4459	3.52178	3.48961	3.4765	3.4429	3.51707	3.54003	3.54322	3.54509	3.52991	3.57183	3.65285	3.62447	3.63343	3.6272	3.1677	3.2442	2.84325	2.86799	2.7854	2.83837	3.48929	3.46967	3.53344	3.54894	3.63866	3.63032	12.6972	1.16378
ENSMUSG00000005958	Ephb3	6.64283	6.56103	6.49877	6.48533	6.52051	6.52002	6.17413	6.16909	6.47891	6.29221	6.34173	6.55431	6.2217	6.40522	6.55962	6.40895	6.53762	6.47112	6.80922	6.96457	6.98952	6.84355	7.0559	7.09192	7.12558	7.05827	7.10179	7.11644	7.11362	7.26635	7.035	7.0893	7.04237	7.13924	6.56754	6.50862	6.27404	6.39608	6.31346	6.50206	6.92111	6.99712	7.09521	7.16547	7.06215	7.09081	92.3654	-0.15708
ENSMUSG00000005968	Tuft1	2.23436	2.19545	2.19741	2.25529	2.18514	2.19165	NA	NA	NA	NA	NA	NA	NA	NA	NA	NA	NA	NA	3.12275	3.12341	3.14776	3.12402	3.11352	3.11895	2.84018	2.85058	2.83423	2.82557	2.86992	2.82009	2.88139	2.9059	2.92302	2.90332	2.20908	2.2107	NA	NA	NA	NA	3.13131	3.11883	2.84167	2.83853	2.89365	2.91317	5.22781	0.0096801
ENSMUSG00000005973	Rcn1	5.7967	5.76473	5.8773	5.67296	5.64084	5.89981	5.64184	5.82417	5.52759	5.64243	5.71354	5.70665	5.48191	5.55605	5.43309	5.51235	5.46956	5.5139	6.36313	6.37815	6.38071	6.36486	6.35616	6.24069	6.44124	6.34316	6.46325	6.54551	6.53302	6.48415	6.53371	6.49818	6.43003	6.48678	5.81291	5.73787	5.66453	5.68754	5.51898	5.47167	6.374	6.32057	6.41588	6.52089	6.51595	6.4584	54.1786	-0.229896
ENSMUSG00000005981	Trap1	8.38636	8.36731	8.43586	8.36039	8.37603	8.40822	8.28591	8.22557	8.25091	8.25308	8.19647	8.26734	8.21583	8.34649	8.18651	8.29762	8.23139	8.16512	8.9708	9.04002	8.97035	9.03504	9.03541	8.98793	9.10916	9.21748	9.08414	9.04943	9.02155	9.15806	9.1438	9.06028	9.17938	9.05375	8.39651	8.38155	8.25413	8.23896	8.28116	8.2385	8.99372	9.01946	9.13693	9.07635	9.10204	9.11657	335.082	-0.020388
ENSMUSG00000005982	Naa60	6.61332	6.59337	6.52988	6.48868	6.63525	6.39566	6.39494	6.2066	6.29489	6.51774	6.46247	6.60479	6.57642	6.62601	6.62655	6.53732	6.62868	6.93098	7.17261	7.03888	7.12367	7.07684	7.1703	7.09061	7.2871	7.26125	7.31147	7.4014	7.2807	7.32754	7.28767	7.28712	7.15801	7.0987	6.57886	6.50653	6.29881	6.52833	6.60121	6.59752	7.11172	7.11258	7.28661	7.33655	7.2874	7.12835	93.0155	-0.177803
ENSMUSG00000005983	1700037C18Rik	4.48449	4.56502	4.54951	4.5401	4.45597	4.50961	4.13424	4.08765	4.07033	4.10348	4.14796	4.03221	4.14042	4.04725	4.2051	4.06532	4.09834	4.15916	4.74442	4.83421	4.94605	4.86924	4.83319	4.80563	4.65455	4.74518	4.68249	4.71894	4.60478	4.67601	5.02785	5.04265	5.13383	5.1123	4.53301	4.50189	4.09741	4.09455	4.09383	4.12292	4.84156	4.83602	4.69407	4.66658	5.03525	5.12306	23.3113	-0.21793
ENSMUSG00000005986	Ankrd13d	6.7828	6.6313	6.61607	6.51656	6.59088	6.61801	6.42147	6.98167	6.48229	6.50289	6.61686	6.40352	6.85473	6.72554	6.83662	6.82687	6.73082	6.74539	7.43538	7.49604	7.52021	7.47255	7.59299	7.42752	7.39726	7.43692	7.47471	7.62929	7.44695	7.37423	7.49286	7.40024	7.52452	7.53882	6.67672	6.57515	6.62848	6.50776	6.79014	6.7981	7.48387	7.49769	7.4363	7.48349	7.44655	7.53167	97.8233	-0.254717
ENSMUSG00000006005	Tpr	9.778	9.90411	9.84173	9.71836	9.88046	10.0003	9.74151	9.37013	9.6976	9.76752	9.62078	9.76953	9.94332	9.59349	9.62288	9.66726	9.72631	9.42907	10.4023	10.3206	10.2562	10.2739	10.2306	10.4793	10.6195	10.4332	10.4454	10.3628	10.5188	10.4998	10.4663	10.4966	10.2656	10.3243	9.84128	9.86639	9.60308	9.71928	9.76841	9.67215	10.3264	10.3279	10.4994	10.4605	10.4814	10.295	926.965	0.0551717
ENSMUSG00000006010	Odr4	6.95775	6.99088	7.09578	7.1357	6.9911	7.00355	6.78296	6.4862	6.62687	6.72223	6.72031	6.49155	6.71089	6.77723	6.72979	6.83009	6.66108	6.57593	7.50335	7.40459	7.44313	7.49369	7.53842	7.51311	7.70719	7.76617	7.77817	7.68725	7.73443	7.72831	7.50263	7.52722	7.5237	7.44697	7.0148	7.04345	6.63201	6.6447	6.74406	6.74032	7.45035	7.51507	7.75051	7.71666	7.51492	7.48534	132.545	0.0497846
ENSMUSG00000006014	Prg4	NA	NA	NA	NA	NA	NA	NA	NA	NA	NA	NA	NA	1.93251	1.86874	1.89877	1.90493	1.84522	1.84615	2.38679	2.34647	2.3445	2.36036	2.35173	2.35021	3.29368	3.35152	3.23778	3.28056	3.29052	3.25338	3.74989	3.71901	3.78552	3.74116	NA	NA	NA	NA	1.90063	1.88298	2.35925	2.3541	3.29433	3.27482	3.73445	3.76334	NA	NA
ENSMUSG00000006019	Dhx34	4.41249	4.41314	4.4341	4.40846	4.46135	4.40049	3.91635	3.96211	3.91192	3.96647	3.96175	3.84733	4.13722	4.2018	4.20698	4.24174	4.15482	4.21408	5.05192	5.06788	5.04927	5.09276	5.02223	5.06203	5.19474	5.13134	5.17617	5.19194	5.13471	5.14628	5.28122	5.20331	5.3113	5.28251	4.41991	4.42343	3.93013	3.92518	4.16951	4.20118	5.05635	5.05901	5.16742	5.15764	5.24227	5.29691	21.3129	0.0345635
ENSMUSG00000006021	Kptn	5.75433	5.70715	5.72464	5.75776	5.70351	5.6387	5.76356	5.83687	5.68159	5.64325	5.69083	5.63154	5.44566	5.4913	5.54054	5.60036	5.47665	5.59434	6.23566	6.17336	6.22548	6.16662	6.09384	6.17342	6.24142	6.40511	6.28409	6.27707	6.28741	6.35978	6.54475	6.43223	6.63384	6.52522	5.72871	5.69999	5.76067	5.65521	5.46848	5.53918	6.2115	6.14463	6.3102	6.30809	6.48849	6.57953	53.2015	-0.119542
ENSMUSG00000006024	Napa	10.4109	10.372	10.4064	10.2629	10.3733	10.4332	10.2246	10.6021	10.2664	10.2084	10.3303	10.1255	10.1901	10.0529	10.1835	10.2251	10.1544	10.235	10.9702	10.9852	10.9884	11.0356	11.0095	10.953	10.9172	10.9712	10.9833	11.1008	11.0612	10.9639	10.9156	10.9829	11.0961	11.1368	10.3964	10.3565	10.3644	10.2214	10.1215	10.1877	10.9813	10.9994	10.9572	11.042	10.9493	11.1164	1329.61	-0.0477046
ENSMUSG00000006050	Sra1	7.51789	7.63662	7.47255	7.60851	7.49423	7.46042	7.5132	7.54318	7.38534	7.40224	7.3831	7.3987	7.29695	7.26812	7.38766	7.38587	7.30186	7.35584	8.02667	8.02531	8.06102	7.92486	8.00606	7.91633	8.04039	8.17505	8.24014	8.10436	8.16871	8.00967	8.17775	8.05005	8.24235	8.23691	7.54235	7.52105	7.48057	7.39468	7.28254	7.35846	8.03767	7.94908	8.15186	8.09425	8.1139	8.23963	186.416	-0.0651214
ENSMUSG00000006057	Atp5g1	3.2397	3.28281	3.32001	3.31813	3.24121	3.29594	3.27941	3.13901	3.15635	3.1042	3.15051	3.18337	3.3116	3.28237	3.27011	3.27361	3.32022	3.30512	3.84473	3.86873	3.82968	3.84414	3.82525	3.85631	3.67009	3.77003	3.64202	3.74568	3.71361	3.69752	3.89916	3.83702	3.8812	3.84577	3.28084	3.28509	3.19159	3.14603	3.29699	3.28798	3.84772	3.8419	3.69405	3.71894	3.86809	3.86349	10.309	0.0444533
ENSMUSG00000006058	Snf8	6.43831	6.44604	6.61504	6.23706	6.44708	6.58977	6.49068	6.55173	6.46794	6.49477	6.45431	6.18615	6.72981	6.50464	6.58163	6.51304	6.64825	6.63297	7.10484	7.15438	7.19178	7.16754	7.08731	7.24853	7.19656	7.1499	7.29864	7.15576	7.24736	7.08415	7.24405	7.19329	7.24183	7.29478	6.49979	6.42464	6.50345	6.37841	6.61722	6.58097	7.15033	7.16779	7.21503	7.16243	7.21867	7.2683	86.6579	-0.168676
ENSMUSG00000006095	Tbcb	8.14804	8.21784	8.19442	7.90062	8.19995	8.13337	8.05532	8.23443	8.15095	8.14642	8.05523	8.31574	7.99039	8.01189	8.132	8.10146	7.99313	8.06087	8.87263	8.81862	8.78478	8.91381	8.91396	8.69126	8.8471	8.96453	8.97882	8.97408	8.91944	8.94501	8.94393	8.91201	9.04094	8.92843	8.18677	8.07798	8.1469	8.17247	8.00114	8.07553	8.82534	8.83968	8.93015	8.94618	8.92797	8.98469	279.373	-0.159748
ENSMUSG00000006127	Inpp5k	7.24765	7.21355	7.21826	7.59642	7.16094	7.13465	6.83779	6.82907	6.70911	6.71442	6.81313	6.49266	6.913	6.93838	6.9107	6.95132	6.91876	6.76604	7.58138	7.51043	7.56925	7.67943	7.6991	7.78792	7.73858	7.86046	7.75493	7.74266	7.66307	7.802	7.87264	7.74953	8.01462	7.98455	7.22649	7.29734	6.79199	6.6734	6.92569	6.92693	7.55368	7.72215	7.78466	7.73591	7.81108	7.99959	160.39	0.165466
ENSMUSG00000006134	Crkl	6.71372	6.79437	6.62943	6.61379	6.62516	6.77609	6.71673	6.59143	6.94152	6.71531	6.65679	6.69511	6.71913	6.68649	6.75232	6.56914	6.7112	6.76221	7.40053	7.49062	7.46885	7.30907	7.34985	7.46887	7.48008	7.52083	7.52657	7.48626	7.59778	7.57219	7.76297	7.66785	7.81116	7.7981	6.7125	6.67168	6.74989	6.68907	6.70281	6.67755	7.45333	7.37593	7.50916	7.55207	7.71541	7.80463	102.628	-0.0928235
ENSMUSG00000006154	Eps8l1	2.14317	2.09946	2.1735	2.17673	2.16371	2.17753	2.53792	2.61122	2.55357	2.83184	2.73515	2.57549	2.70439	2.65758	2.66928	2.7227	2.6961	2.70015	3.30809	3.2236	3.31194	3.18708	3.23577	3.21116	3.70864	3.67133	3.6923	3.84349	3.78824	3.68157	3.00875	2.96441	2.97766	2.99499	2.13871	2.17266	2.56757	2.71416	2.68099	2.69603	3.28121	3.21134	3.69075	3.7711	2.98658	2.98633	4.81737	0.923028
ENSMUSG00000006169	Clint1	7.99251	7.93266	8.0979	8.0091	7.98931	8.05596	7.95955	7.83682	7.91631	7.8255	7.86287	8.04089	7.86023	7.78104	7.79517	7.79709	7.89927	7.74934	8.44603	8.48918	8.58342	8.4752	8.42946	8.44927	8.59114	8.56052	8.5577	8.47918	8.55478	8.54345	8.61765	8.56615	8.52908	8.46524	8.00769	8.01812	7.90423	7.90975	7.82064	7.83051	8.50621	8.45131	8.56978	8.52581	8.5919	8.49716	258.854	0.0220778
ENSMUSG00000006179	Prss16	NA	NA	NA	NA	NA	NA	NA	NA	NA	NA	NA	NA	NA	NA	NA	NA	NA	NA	2.47401	2.47441	2.4928	2.47122	2.47109	2.49238	2.82399	2.88712	2.82432	2.8259	2.83889	2.89836	NA	NA	NA	NA	NA	NA	NA	NA	NA	NA	2.48041	2.47823	2.84514	2.85438	NA	NA	NA	NA
ENSMUSG00000006191	Cdkal1	6.20178	6.41109	6.37417	6.3739	6.40617	6.42811	6.2477	5.8393	6.1054	6.07718	6.14437	6.06938	6.20467	6.20262	6.09401	6.1323	6.18146	6.09329	7.00813	6.99573	6.90817	7.0703	6.90582	7.06385	7.08476	7.27215	7.02239	6.97915	7.0658	7.06461	7.11635	7.15579	7.11462	7.03124	6.32901	6.40273	6.06413	6.09698	6.20365	6.13592	6.97068	7.01332	7.12643	7.03652	7.13607	7.07293	82.971	0.202803
ENSMUSG00000006205	Htra1	7.08988	6.93587	7.08428	6.88824	7.06582	7.16497	7.61993	7.37625	7.53494	7.27853	7.41414	7.9441	6.89318	6.87243	6.91006	6.99392	6.82526	6.79918	7.82654	7.88654	7.91303	7.809	7.93969	7.89339	8.21515	8.24917	8.11512	8.26714	8.13626	8.16835	8.20814	8.2077	8.40958	8.47378	7.03668	7.03968	7.51038	7.54559	6.88281	6.90974	7.87537	7.88069	8.19314	8.19058	8.20792	8.44168	130.423	0.0399559
ENSMUSG00000006215	Zbtb17	5.97406	5.94517	5.90154	6.09867	6.01384	5.84254	5.78944	5.82148	5.86235	5.67867	5.71156	5.85892	5.91841	5.83882	5.95325	5.82466	5.90821	5.94764	6.33731	6.35256	6.39349	6.45826	6.44122	6.42248	6.5465	6.56875	6.45862	6.50434	6.53895	6.43597	6.60865	6.4991	6.54267	6.5809	5.94026	5.98501	5.82442	5.74971	5.87861	5.89537	6.36112	6.44065	6.52462	6.49308	6.55388	6.56179	64.4699	0.133994
ENSMUSG00000006235	Epor	3.39415	3.3661	3.35568	3.44636	3.39628	3.39558	3.04218	3.13827	3.19768	3.11095	3.20532	3.20071	2.99646	3.07032	3.06217	3.04536	3.03995	3.03374	3.72222	3.69981	3.79108	3.7031	3.73673	3.6819	3.86227	3.8059	3.85329	3.85932	3.89453	3.80894	3.79036	3.76091	3.7453	3.84618	3.37198	3.41274	3.12604	3.17232	3.03339	3.04916	3.7377	3.70724	3.84048	3.85426	3.77563	3.79574	11.1778	0.476998
ENSMUSG00000006241	Ccdc159	3.36023	3.44823	3.33207	3.37522	3.41315	3.42723	3.32854	3.5092	3.42783	3.47892	3.44691	3.39184	3.45612	3.39348	3.41346	3.36354	3.41253	3.45166	3.94159	3.95036	3.96365	3.95834	3.94694	3.93008	4.00161	4.07921	3.99036	4.06816	3.99738	4.02001	4.09935	4.05258	4.07589	4.08954	3.38018	3.4052	3.42185	3.43923	3.4248	3.39651	3.95186	3.94512	4.02373	4.02852	4.07597	4.08272	10.1915	0.302675
ENSMUSG00000006262	Mob1b	7.31266	7.24638	7.33106	7.55093	7.28086	7.34831	7.08402	6.8241	7.04203	7.09212	6.99097	6.988	6.9558	7.1158	6.87087	7.02267	6.91293	6.83624	7.64439	7.62568	7.67544	7.69469	7.66315	7.71731	8.18443	8.06664	8.06515	7.88382	7.86247	8.07365	7.89388	7.809	7.75485	7.6531	7.2967	7.39337	6.98338	7.02369	7.0358	6.93549	7.6485	7.69172	8.10541	7.93998	7.85144	7.70398	166.34	0.187063
ENSMUSG00000006273	Atp6v1b2	12.1609	12.2051	12.1797	12.3578	12.1215	12.1716	12.0695	11.9934	11.9982	12.0828	12.0602	11.9108	11.9026	12.0004	11.9728	11.9265	11.949	11.8898	12.69	12.6495	12.7073	12.6793	12.6751	12.7102	12.7823	12.8763	12.8049	12.7501	12.766	12.8551	12.8413	12.8073	12.981	12.8736	12.1819	12.217	12.0204	12.0179	11.9515	11.9494	12.6823	12.6882	12.8212	12.7904	12.8243	12.9273	4716.89	0.0516666
ENSMUSG00000006276	Eps15l1	7.94577	7.9677	7.87091	7.60887	7.8818	7.92401	7.68185	7.85187	7.81639	7.74684	7.79799	7.799	7.69308	7.67443	7.8154	7.68526	7.66747	7.70707	8.33478	8.44103	8.46055	8.41905	8.31828	8.40738	8.32045	8.4344	8.41542	8.41515	8.40799	8.52706	8.42044	8.43175	8.44535	8.53968	7.92813	7.80489	7.78337	7.78127	7.68375	7.72271	8.41212	8.38157	8.39009	8.45007	8.42609	8.49252	231.809	-0.194165
ENSMUSG00000006281	Tep1	4.26143	4.18479	4.24168	4.22841	4.26507	4.17296	4.12848	4.0696	3.98342	4.11991	3.97543	4.06337	3.98883	4.10197	4.13159	4.06958	4.13011	4.05029	4.73797	4.79786	4.77653	4.84034	4.8089	4.82479	4.92428	4.8499	4.88001	4.92641	4.83519	4.93313	4.80427	4.72469	4.88678	4.81868	4.2293	4.22215	4.0605	4.0529	4.0454	4.11043	4.77079	4.82467	4.88473	4.89824	4.76448	4.85273	18.862	-0.0533592
ENSMUSG00000006288	Ttc5	6.06513	6.0432	6.04403	5.94984	6.00059	5.89156	6.06284	6.1214	6.1218	6.05194	6.05185	6.142	5.70934	5.82051	5.89527	5.74308	5.95464	5.90226	6.703	6.78429	6.7408	6.69794	6.64477	6.60871	6.42505	6.41786	6.45927	6.59791	6.55034	6.51342	6.64404	6.6492	6.73662	6.67395	6.05078	5.94733	6.10201	6.08193	5.76492	5.86433	6.7427	6.65047	6.43406	6.55389	6.64662	6.70529	63.641	-0.332383
ENSMUSG00000006289	Osgep	5.32619	5.36287	5.26317	5.22329	5.20666	5.35321	5.48744	5.38714	5.3797	5.38358	5.47713	5.52871	5.11798	5.14777	5.05398	5.14293	5.19652	5.13679	5.83415	5.88007	5.83329	5.93616	5.87701	5.8136	6.09729	6.05435	6.03636	6.04364	6.03255	6.04029	6.23005	6.27925	6.21662	6.2209	5.31741	5.26105	5.41809	5.46314	5.13287	5.13114	5.84917	5.87559	6.06267	6.03883	6.25465	6.21876	38.3479	-0.233642
ENSMUSG00000006299	Aamp	8.8305	8.71405	8.82199	8.92769	8.71005	8.74499	8.53362	8.67575	8.58892	8.56166	8.55265	8.53145	8.39613	8.42228	8.54677	8.50037	8.55364	8.71023	9.19994	9.22628	9.34427	9.20376	9.27744	9.15026	9.3099	9.25921	9.41904	9.27367	9.26447	9.33524	9.35486	9.3503	9.36203	9.44535	8.78885	8.79424	8.59943	8.54859	8.40921	8.53359	9.25683	9.21049	9.32938	9.29113	9.35258	9.40369	446.344	-0.0034962
ENSMUSG00000006301	Tmbim1	3.32706	3.32824	3.3488	3.50002	3.34871	3.37711	3.49732	3.49886	3.4246	3.37025	3.39134	3.5139	3.54246	3.48356	3.50855	3.48321	3.50849	3.51513	3.83374	3.79601	3.87271	3.81613	3.80815	3.87169	4.34227	4.48465	4.41816	4.45436	4.41979	4.4342	4.74246	4.69739	4.72693	4.79186	3.3347	3.40861	3.47359	3.42516	3.51301	3.50008	3.83415	3.83199	4.41502	4.43612	4.71993	4.7594	12.1395	0.889519
ENSMUSG00000006304	Arpc2	9.99457	10.0159	10.0381	10.2004	10.0993	9.8999	9.91867	9.66274	9.87245	9.86059	9.77959	9.82832	9.95034	9.88693	9.71531	9.86685	9.85657	9.72342	10.4582	10.4824	10.3783	10.5224	10.4708	10.5154	10.6382	10.6575	10.4872	10.4747	10.5747	10.6757	10.5622	10.6638	10.6679	10.5708	10.0162	10.0665	9.81795	9.82283	9.91864	9.81291	10.4396	10.5029	10.5943	10.575	10.613	10.6193	1060.03	0.0753669
ENSMUSG00000006307	Kmt2b	6.05876	5.95719	5.86707	5.95618	5.93217	5.85581	5.73933	5.88822	6.05532	5.80623	5.87578	6.25352	5.74292	5.82302	5.87459	5.77355	5.8636	5.83499	6.24649	6.36748	6.26935	6.37204	6.35437	6.38831	6.47385	6.45946	6.57376	6.51406	6.54462	6.61483	6.61416	6.61357	6.68532	6.73637	5.961	5.91472	5.89429	5.97851	5.78297	5.83725	6.29444	6.37157	6.50236	6.55784	6.61387	6.71085	61.6902	-0.174791
ENSMUSG00000006315	Tmem147	7.20613	7.34855	7.31877	7.17063	7.28698	7.2627	7.14679	7.15788	6.91996	7.21713	7.13432	6.94002	6.80782	7.03414	6.97712	6.86631	6.8061	6.89797	7.72577	7.60096	7.87724	7.55298	7.67284	7.6058	8.10563	8.1094	8.23629	8.14754	8.03267	8.1188	7.92335	7.94719	7.84856	7.85944	7.29115	7.2401	7.07488	7.09716	6.92098	6.88318	7.73466	7.61054	8.15044	8.09967	7.93527	7.854	153.092	-0.09583
ENSMUSG00000006333	Rps9	7.83509	7.87328	7.93233	7.70355	7.7523	7.97331	7.67193	7.82017	7.66884	7.67182	7.69451	7.99232	7.55274	7.58443	7.66144	7.69113	7.73247	7.87263	8.10497	8.18626	8.40007	8.25681	8.12937	8.09454	8.2109	8.36222	8.39748	8.31144	8.26461	8.31505	8.34128	8.42213	8.34044	8.28671	7.88023	7.80972	7.72031	7.78622	7.56858	7.69501	8.23043	8.16024	8.32353	8.29704	8.38171	8.31357	229.4	-0.104282
ENSMUSG00000006335	Tfpt	5.55652	5.5599	5.54348	5.48005	5.52024	5.59661	5.55627	5.86204	5.75522	5.55605	5.699	5.69026	5.61977	5.54393	5.54497	5.51417	5.56106	5.51474	6.27923	6.37479	6.28472	6.27382	6.26921	6.32235	6.37706	6.43736	6.47831	6.56193	6.51055	6.43657	6.57474	6.52002	6.64314	6.60499	5.5533	5.5323	5.72451	5.64844	5.58185	5.54007	6.31292	6.28846	6.43091	6.50302	6.54738	6.62407	45.8554	-0.062036
ENSMUSG00000006342	Susd2	6.4639	6.46065	6.22251	6.33567	6.2387	6.43676	6.30767	6.25855	6.22624	6.19992	6.40468	6.09838	5.79446	5.96136	5.92037	5.87215	5.94456	5.90266	6.90531	6.9429	6.94668	6.79946	6.95517	6.97214	7.1555	7.1235	7.21444	7.21863	7.06386	7.01875	6.80782	6.65512	6.56058	6.63071	6.38235	6.33704	6.26415	6.23433	5.87791	5.91236	6.93163	6.90893	7.16448	7.10041	6.73147	6.59564	82.1939	-0.137682
ENSMUSG00000006356	Crip2	9.08751	8.99753	8.99646	9.0828	8.91065	8.98696	8.73758	8.92266	8.91627	8.85421	8.84022	8.90293	8.69147	8.58783	8.77169	8.77865	8.67805	8.86641	9.51322	9.34749	9.51738	9.45527	9.4165	9.27233	9.30524	9.48338	9.57218	9.39517	9.4762	9.35351	9.50516	9.40557	9.44863	9.47501	9.02717	8.99347	8.85883	8.86579	8.63965	8.7428	9.45936	9.38137	9.4536	9.40829	9.45537	9.46182	517.526	-0.0649527
ENSMUSG00000006360	Crip1	NA	NA	NA	NA	NA	NA	NA	NA	NA	NA	NA	NA	NA	NA	NA	NA	NA	NA	NA	NA	NA	NA	NA	NA	NA	NA	NA	NA	NA	NA	2.40175	2.3763	2.42646	2.38892	NA	NA	NA	NA	NA	NA	NA	NA	NA	NA	2.38903	2.40769	NA	NA
ENSMUSG00000006362	Cbfa2t3	5.29045	5.25835	5.10312	5.16879	5.10706	5.1402	5.12329	5.24782	5.62649	5.09002	5.2874	5.5344	5.12311	5.24439	5.37835	5.17951	5.3736	5.27838	5.60601	5.53006	5.63	5.61577	5.6348	5.69816	5.71014	5.73159	5.81466	5.81726	5.89344	5.87502	6.01061	6.0259	6.20564	6.1607	5.21731	5.13868	5.33253	5.30394	5.18375	5.31049	5.58869	5.64957	5.75213	5.86191	6.01826	6.18317	36.1766	-0.394314
ENSMUSG00000006369	Fbln1	2.63101	2.51537	2.5271	2.51456	2.54134	2.57767	3.19325	3.12309	3.11701	3.07963	3.29041	3.22061	2.65055	2.68908	2.66659	2.67166	2.69345	2.63138	3.53712	3.46766	3.47428	3.50357	3.49677	3.48509	4.10951	4.07215	4.14466	4.1824	4.1342	4.07777	4.59913	4.59105	4.6541	4.64633	2.55783	2.54452	3.14445	3.19688	2.66981	2.67723	3.49302	3.49515	4.10877	4.13146	4.59509	4.65022	5.41906	-0.309835
ENSMUSG00000006373	Pgrmc1	9.61224	9.62403	9.61891	9.6955	9.5533	9.64882	9.43093	9.81846	9.45152	9.44168	9.66461	9.40363	9.2778	9.27778	9.44784	9.29374	9.34153	9.49176	10.1403	10.144	10.318	10.1497	10.107	10.0186	10.2095	10.1281	10.3209	10.404	10.3574	10.1539	10.2699	10.2823	10.3094	10.384	9.61839	9.63254	9.56697	9.50331	9.27779	9.36104	10.2007	10.0918	10.2195	10.3051	10.2761	10.3467	791.428	0.0165633
ENSMUSG00000006378	Gcat	4.95632	5.02709	5.0307	4.96789	4.89528	4.95389	5.20105	5.07957	5.09856	5.07942	5.10713	5.38554	4.79533	4.85623	4.94256	4.92518	4.83169	4.74696	5.84057	5.77807	5.80375	5.74893	5.78854	5.72423	6.00228	5.90082	6.05906	5.92194	5.96819	6.01118	5.90389	5.90025	6.05593	5.9784	5.0047	4.93902	5.12639	5.1907	4.82578	4.89981	5.80747	5.7539	5.98739	5.9671	5.90207	6.01716	31.5356	-0.34938
ENSMUSG00000006386	Tek	NA	NA	NA	NA	NA	NA	NA	NA	NA	NA	NA	NA	NA	NA	NA	NA	NA	NA	1.78293	1.77501	1.80306	1.77739	1.81084	1.79132	NA	NA	NA	NA	NA	NA	NA	NA	NA	NA	NA	NA	NA	NA	NA	NA	1.787	1.79318	NA	NA	NA	NA	NA	NA
ENSMUSG00000006390	Elovl1	NA	NA	NA	NA	NA	NA	NA	NA	NA	NA	NA	NA	NA	NA	NA	NA	NA	NA	NA	NA	NA	NA	NA	NA	2.57242	2.58994	2.58249	2.58298	2.5623	2.57794	2.76294	2.75445	2.7612	2.77269	NA	NA	NA	NA	NA	NA	NA	NA	2.58162	2.57441	2.7587	2.76694	NA	NA
ENSMUSG00000006392	Med8	5.92492	5.91016	5.9248	5.73536	5.83352	5.92464	5.85337	5.86775	5.9141	5.85739	5.92524	6.08184	5.96541	5.79567	5.84048	5.85049	5.81762	5.75079	6.55536	6.5913	6.66791	6.62966	6.62685	6.6347	6.66535	6.64201	6.74457	6.70492	6.62293	6.58282	6.57608	6.64638	6.59965	6.57232	5.91996	5.83118	5.87841	5.95482	5.88054	5.8362	6.60485	6.6304	6.68398	6.63689	6.61123	6.58598	57.2571	-0.26896
ENSMUSG00000006395	Hyi	2.43985	2.42989	2.42511	2.46039	2.45029	2.4715	2.39146	2.45126	2.47856	2.40727	2.50684	2.46601	NA	NA	NA	NA	NA	NA	3.27738	3.26991	3.33859	3.32083	3.28979	3.32149	3.71782	3.73337	3.70961	3.81608	3.78331	3.73752	3.29523	3.3394	3.32363	3.29912	2.43162	2.46073	2.44042	2.46004	NA	NA	3.29529	3.31071	3.72027	3.77897	3.31731	3.31138	5.60649	0.653113
ENSMUSG00000006398	Cdc20	NA	NA	NA	NA	NA	NA	NA	NA	NA	NA	NA	NA	1.12271	1.083	1.07893	1.06284	1.12855	1.06874	1.95935	1.95959	1.9793	1.98099	1.96037	1.97901	2.32642	2.36914	2.3616	2.37108	2.34208	2.32623	NA	NA	NA	NA	NA	NA	NA	NA	1.10285	1.09011	1.96608	1.97346	2.35239	2.34646	NA	NA	NA	NA
ENSMUSG00000006403	Adamts4	3.80785	3.83601	3.75056	3.69666	3.81823	3.76887	3.95576	3.98906	3.78029	3.97554	3.97816	3.88009	3.91872	3.96105	3.90129	3.89463	3.9628	3.91054	4.73922	4.86893	4.79007	4.81027	4.868	4.76823	5.16189	5.1591	5.21076	5.18449	5.17226	5.12766	4.93432	4.89951	4.95414	5.00728	3.79814	3.76125	3.90837	3.9446	3.93989	3.91957	4.79941	4.8155	5.17725	5.16147	4.91691	4.98071	12.6677	-0.359161
ENSMUSG00000006411	Nectin4	3.20465	3.1406	3.09003	3.09023	3.18324	3.15902	3.13078	3.28052	3.19286	3.14694	3.24551	3.12969	3.20038	3.09574	3.16189	3.20398	3.11672	3.09762	4.04918	3.99651	4.0257	4.06025	4.04988	4.05701	3.59425	3.65182	3.68161	3.6466	3.61514	3.61018	3.80612	3.7913	3.77156	3.84064	3.14509	3.14416	3.20139	3.17405	3.14806	3.16086	4.0238	4.05571	3.64256	3.62397	3.79871	3.8061	8.10462	-0.0157826
ENSMUSG00000006412	Pfdn2	7.11501	7.01741	7.03128	7.06538	7.11205	7.16858	7.09141	7.27817	7.2364	7.05738	7.08411	7.06693	7.24878	6.97273	7.04672	7.05964	6.8983	6.90881	7.80923	7.83971	7.88739	7.92976	7.70992	7.80195	7.781	7.83933	7.75332	7.95542	7.90631	7.73455	7.93485	7.90979	8.03149	8.195	7.05457	7.11533	7.20199	7.06948	7.11076	7.00155	7.84544	7.81388	7.79122	7.86543	7.92232	8.11325	135.675	0.146221
ENSMUSG00000006418	Rnf114	5.19013	5.21607	5.25308	5.10596	5.16856	5.28127	5.19101	5.23441	5.23037	5.16884	5.08416	5.13471	5.35579	5.28695	5.28178	5.28316	5.25711	5.41135	6.0077	6.05171	6.02893	6.01209	5.95388	5.98201	6.23032	6.20757	6.22051	6.35191	6.21612	6.14564	6.32306	6.30175	6.37943	6.36207	5.21976	5.18526	5.2186	5.12924	5.32137	5.27402	6.02945	5.98266	6.21947	6.23789	6.3124	6.37075	35.8167	-0.125532
ENSMUSG00000006423	C330007P06Rik	3.53552	3.57253	3.54209	3.46758	3.60074	3.51288	3.32769	3.2796	3.26467	3.23514	3.33569	3.2962	3.57688	3.56056	3.54707	3.60278	3.5254	3.54184	4.34652	4.30447	4.33516	4.25883	4.30517	4.24386	4.20776	4.20445	4.14646	4.31039	4.33086	4.23098	4.45324	4.47701	4.46314	4.4805	3.55005	3.52707	3.29065	3.28901	3.56872	3.55842	4.32872	4.26929	4.18622	4.29074	4.46513	4.47182	10.7706	-0.24051
ENSMUSG00000006435	Neurl1a	6.7996	6.86799	6.78519	6.53319	6.84411	6.76207	6.69636	6.98382	6.9142	6.73519	6.73043	6.99934	6.68047	6.8115	6.93427	6.76052	6.76332	6.96894	7.40943	7.45512	7.41514	7.54767	7.51741	7.4235	7.48769	7.67064	7.65232	7.71263	7.62752	7.5921	7.5578	7.541	7.58631	7.59973	6.8176	6.71312	6.86479	6.82165	6.74599	6.81937	7.42657	7.4962	7.60355	7.64408	7.5494	7.59302	106.711	-0.216633
ENSMUSG00000006442	Srm	7.5707	7.61795	7.44547	7.47769	7.48538	7.44578	7.20398	7.37468	7.32806	7.25123	7.30671	7.39258	7.15574	7.22316	7.10573	7.20804	7.20703	7.3938	7.86215	7.78324	7.82752	7.84406	7.81068	7.78761	8.07874	7.90431	8.18414	8.13918	8.1733	8.06474	8.03489	8.06594	7.95266	7.93978	7.54471	7.46962	7.30224	7.31684	7.18945	7.1736	7.8243	7.81411	8.05573	8.12574	8.05041	7.94622	181.853	-0.162924
ENSMUSG00000006456	Rbm14	6.3688	6.46291	6.29179	6.58747	6.31327	6.25669	6.25839	6.29077	6.14956	6.29578	6.2218	6.17541	5.92218	6.16737	6.12748	6.05403	6.07521	6.1296	6.82213	6.88751	6.92672	6.75209	6.81785	6.66775	6.95079	7.15465	7.19674	6.99844	6.95726	7.06079	7.07467	7.15085	7.07309	6.99221	6.3745	6.38581	6.2329	6.231	6.04478	6.08557	6.87879	6.7459	7.10073	7.0055	7.11276	7.03265	86.7681	0.0174991
ENSMUSG00000006457	Actn3	2.27334	2.25493	2.28475	2.28991	2.28395	2.24201	1.80743	1.9054	1.82436	1.83243	1.8347	1.88523	NA	NA	NA	NA	NA	NA	2.89264	2.91714	2.90902	2.89079	2.94718	2.90856	3.04113	3.07074	3.06453	3.04388	3.02234	3.01377	2.66418	2.68218	2.68488	2.66287	2.27101	2.27195	1.84573	1.85079	NA	NA	2.90627	2.91551	3.0588	3.02666	2.67318	2.67387	5.12031	0.0121899
ENSMUSG00000006463	Zdhhc24	2.52318	2.53334	2.5665	2.60193	2.61113	2.55825	3.02861	3.09318	3.11963	3.0035	2.91962	3.18953	2.59002	2.60028	2.62673	2.62578	2.56899	2.61641	3.19038	3.22288	3.22296	3.21738	3.18199	3.18815	3.4222	3.40978	3.484	3.45016	3.38684	3.43011	3.65933	3.65687	3.68505	3.73371	2.54101	2.59044	3.08047	3.03755	2.59515	2.60717	3.21207	3.19584	3.43866	3.42237	3.6581	3.70938	6.45317	1.02599
ENSMUSG00000006464	Bbs1	6.06932	5.99193	5.95122	5.95569	6.0112	5.91955	5.88032	6.10726	5.96362	5.88147	5.87235	5.97413	5.7337	5.83792	5.96887	5.93266	5.94246	5.79154	6.44178	6.52567	6.54072	6.47114	6.532	6.52009	6.61559	6.67868	6.69425	6.68244	6.74319	6.69999	6.76281	6.6831	6.86229	6.77879	6.00416	5.96214	5.98374	5.90932	5.78581	5.948	6.50272	6.50774	6.66284	6.70854	6.72296	6.82054	62.9919	-0.138538
ENSMUSG00000006471	Ndor1	1.97395	1.96638	1.95352	1.94525	1.99206	1.98767	NA	NA	NA	NA	NA	NA	1.97556	1.97969	1.98185	2.00766	1.98512	2.00999	2.73378	2.69367	2.70171	2.72601	2.7248	2.70136	2.63169	2.64083	2.64281	2.63383	2.63787	2.59866	NA	NA	NA	NA	1.96462	1.97499	NA	NA	1.97762	1.99154	2.70972	2.71739	2.63844	2.62345	NA	NA	3.57374	0.360271
ENSMUSG00000006476	Nsmf	8.23578	8.14891	8.19212	7.83781	8.33183	7.97207	7.921	7.80962	8.02957	7.86988	7.81303	8.0841	8.18278	8.12499	8.10635	8.23907	8.15457	8.35929	8.53441	8.72442	8.62664	8.90843	8.90043	8.60998	8.75245	8.76921	8.61329	8.81248	8.66434	8.65756	8.76623	8.71605	8.92533	8.94709	8.19227	8.04724	7.92006	7.92234	8.15389	8.16666	8.62849	8.80628	8.71165	8.71146	8.74114	8.93621	278.784	-0.211196
ENSMUSG00000006494	Pdk1	7.68608	7.69865	7.65493	7.87864	7.70635	7.53437	7.52677	7.3417	7.48531	7.56391	7.44248	7.306	7.55726	7.66123	7.5335	7.63749	7.56969	7.53396	8.35778	8.3738	8.23908	8.45052	8.42683	8.36648	8.59913	8.61384	8.48169	8.50954	8.41107	8.4902	8.34831	8.35766	8.38074	8.32565	7.67989	7.70645	7.45126	7.43746	7.60925	7.58023	8.32355	8.41461	8.56489	8.47027	8.35298	8.35319	210.617	0.0405646
ENSMUSG00000006498	Ptbp1	3.44239	3.44699	3.33511	3.32953	3.38899	3.41935	3.1752	3.08992	3.04129	3.15649	3.15056	3.18545	3.31838	3.35846	3.41315	3.34514	3.34325	3.40221	3.92218	3.96069	3.86676	3.85583	3.94239	3.87168	4.40067	4.41613	4.36057	4.48834	4.47457	4.54667	4.52339	4.53274	4.59886	4.55083	3.40817	3.37929	3.10214	3.16417	3.33842	3.36718	3.91654	3.88997	4.39245	4.50319	4.52807	4.57485	9.62404	-0.375501
ENSMUSG00000006517	Mvd	5.56754	5.55611	5.52251	5.322	5.58541	5.46531	5.74544	6.04143	5.91244	5.74581	5.95701	5.98345	5.49905	5.59022	5.69545	5.60261	5.47645	5.6759	6.26342	6.32967	6.33353	6.35914	6.45933	6.34146	6.4323	6.53116	6.43952	6.54281	6.50057	6.5382	6.22002	6.17032	6.32766	6.1767	5.54872	5.45757	5.89977	5.89542	5.54464	5.5915	6.30887	6.38664	6.46766	6.52719	6.19517	6.25218	43.4626	-0.328932
ENSMUSG00000006519	Cyba	NA	NA	NA	NA	NA	NA	NA	NA	NA	NA	NA	NA	NA	NA	NA	NA	NA	NA	NA	NA	NA	NA	NA	NA	NA	NA	NA	NA	NA	NA	3.09404	3.09981	3.11826	3.13202	NA	NA	NA	NA	NA	NA	NA	NA	NA	NA	3.09693	3.12514	NA	NA
ENSMUSG00000006522	Itih3	3.03073	2.96749	2.95496	2.92569	2.91401	3.0537	3.99231	3.8852	4.01456	3.76821	4.03031	4.22572	2.49149	2.47994	2.42638	2.47176	2.49596	2.46599	3.11889	3.07974	3.05331	3.09562	3.12027	3.16027	4.04634	4.02767	3.96079	4.04401	4.08484	4.03569	4.92737	4.88377	5.08054	5.12053	2.98439	2.96447	3.96402	4.00808	2.48571	2.4647	3.08398	3.12538	4.0116	4.05485	4.90557	5.10053	7.28685	-0.308577
ENSMUSG00000006526	Stimate	4.19909	4.25386	4.24831	4.24963	4.3426	4.34611	4.58353	4.64576	4.34591	4.51212	4.55166	4.50422	4.45774	4.37588	4.27279	4.24622	4.3176	4.25409	5.00113	4.98226	5.01901	5.05643	4.94866	4.98825	5.16842	5.13794	5.21135	5.15819	5.19688	5.09635	4.67939	4.68542	4.63625	4.72482	4.23375	4.31278	4.52507	4.52267	4.41681	4.27887	5.0008	4.99778	5.17257	5.15047	4.6824	4.68053	19.1093	0.610821
ENSMUSG00000006527	Sfmbt1	6.89368	6.94689	6.95876	7.00061	7.0236	6.85939	6.70927	6.60283	6.53734	6.63654	6.60726	6.36792	6.76365	6.89153	6.77109	6.87531	6.83911	6.85111	7.4356	7.48892	7.43463	7.53259	7.60084	7.53264	7.68825	7.72646	7.61833	7.6978	7.6121	7.72892	7.59362	7.59256	7.67041	7.68661	6.93311	6.9612	6.61648	6.53724	6.82759	6.8285	7.45305	7.55535	7.67768	7.67961	7.59309	7.67851	124.426	0.062471
ENSMUSG00000006567	Atp7b	NA	NA	NA	NA	NA	NA	2.28803	2.27903	2.21943	2.16841	2.15946	2.34472	2.06668	2.07917	2.0778	2.06874	2.02679	2.08551	2.38951	2.35746	2.38127	2.37046	2.37754	2.38091	2.49384	2.52953	2.50373	2.45154	2.50036	2.49905	2.62102	2.61504	2.58091	2.60164	NA	NA	2.26216	2.2242	2.07292	2.05778	2.37608	2.37631	2.50903	2.48365	2.61803	2.59127	NA	NA
ENSMUSG00000006575	Rundc3a	8.47695	8.42276	8.45743	8.34731	8.32453	8.2498	8.17014	8.43521	8.10023	8.11652	8.04972	7.96067	8.49878	8.38745	8.38193	8.41243	8.30789	8.51071	8.88084	9.06367	8.90646	9.05624	9.14174	8.99154	8.97823	9.10782	8.89596	9.04134	8.94989	9.08094	9.11532	9.03106	9.26325	9.19402	8.45238	8.30721	8.2352	8.0423	8.44311	8.36742	8.95032	9.06318	8.994	9.02406	9.07319	9.22864	333.948	-0.257587
ENSMUSG00000006576	Slc4a3	7.90923	7.84612	7.88846	7.61204	7.95148	7.77623	7.97688	8.2113	7.9171	7.93041	7.97921	8.12507	7.93279	7.81913	7.90209	7.9016	7.94539	8.19544	8.6419	8.70947	8.63603	8.56826	8.55784	8.53775	8.63078	8.57484	8.72232	8.73526	8.72803	8.6209	8.71827	8.71832	8.65221	8.67977	7.88127	7.77992	8.03509	8.01156	7.87596	7.91636	8.66246	8.55462	8.64265	8.69473	8.71829	8.66599	226.512	-0.153831
ENSMUSG00000006585	Cdt1	2.41722	2.4297	2.41993	2.37981	2.40967	2.42177	2.48704	2.63781	2.51363	2.53312	2.5481	2.4707	2.67572	2.70794	2.68143	2.71645	2.67592	2.70128	3.76611	3.75172	3.774	3.7309	3.7975	3.74584	3.47461	3.51539	3.45587	3.51058	3.47146	3.49246	3.58783	3.53591	3.56928	3.59545	2.42229	2.40375	2.54616	2.51731	2.69183	2.69126	3.76394	3.75808	3.48196	3.4915	3.56187	3.58237	4.90726	-0.42245
ENSMUSG00000006586	Runx1t1	7.32569	7.40659	7.33116	7.28857	7.34658	7.37174	6.96596	7.06843	7.17025	7.06071	7.04185	6.98309	6.96251	6.96861	7.11512	7.0356	7.1603	7.07982	7.81767	7.8542	7.84447	7.7577	7.7704	7.77699	7.85643	7.86827	7.88955	8.02127	8.12158	7.93524	7.89236	7.98929	7.78174	7.98626	7.35448	7.33563	7.06821	7.02855	6.96556	7.10367	7.83878	7.76836	7.87142	8.02603	7.94082	7.884	161.933	-0.0310433
ENSMUSG00000006589	Aprt	6.35519	6.37087	6.4274	6.70004	6.26402	6.36889	6.29478	6.40772	6.23941	6.23365	6.37587	6.3581	6.24609	6.37329	6.48549	6.36528	6.46279	6.58927	6.99859	6.89408	7.01824	6.9531	6.88672	6.91876	7.00044	7.07065	7.15051	7.07063	7.07944	7.07422	6.99001	7.04242	7.09109	7.06483	6.38449	6.44432	6.31397	6.32254	6.30969	6.43785	6.9703	6.91953	7.07387	7.07476	7.01622	7.07796	90.4978	0.178034
ENSMUSG00000006599	Gtf2h1	6.70993	6.7296	6.66024	6.88748	6.65021	6.68921	6.44203	6.24178	6.42017	6.49753	6.23292	6.74286	6.5098	6.44223	6.40114	6.40832	6.48369	6.46331	7.16434	7.16166	7.1498	7.13626	7.11854	7.25133	7.1884	7.12167	7.07505	7.13831	7.15843	7.09499	7.15519	7.21858	7.16011	7.18134	6.69992	6.7423	6.368	6.4911	6.47602	6.43105	7.1586	7.16871	7.12837	7.13058	7.18689	7.17072	108.081	0.0825861
ENSMUSG00000006611	Hfe	1.9199	1.85996	1.89314	1.89529	1.87401	1.92501	NA	NA	NA	NA	NA	NA	NA	NA	NA	NA	NA	NA	2.19268	2.20949	2.2037	2.20661	2.20552	2.17949	2.748	2.69424	2.76129	2.73362	2.75367	2.71916	3.12095	3.13552	3.14439	3.13061	1.891	1.89811	NA	NA	NA	NA	2.20196	2.19721	2.73451	2.73548	3.12823	3.1375	3.7548	0.235515
ENSMUSG00000006638	Abhd1	NA	NA	NA	NA	NA	NA	NA	NA	NA	NA	NA	NA	NA	NA	NA	NA	NA	NA	1.85201	1.88508	1.88059	1.86381	1.87515	1.8567	NA	NA	NA	NA	NA	NA	NA	NA	NA	NA	NA	NA	NA	NA	NA	NA	1.87256	1.86522	NA	NA	NA	NA	NA	NA
ENSMUSG00000006641	Slc5a6	5.03608	4.94966	5.0265	4.97493	4.98645	5.05025	4.72073	4.86962	4.95667	4.70355	4.86778	4.88592	4.32579	4.34862	4.45888	4.30287	4.40818	4.37112	5.46698	5.46358	5.43971	5.4637	5.30342	5.38708	5.46573	5.45136	5.48147	5.47037	5.52014	5.46592	5.53209	5.53123	5.54338	5.48904	5.00408	5.00388	4.849	4.81909	4.33721	4.38998	5.45675	5.38473	5.46619	5.48547	5.53166	5.51621	31.8361	0.0115218
ENSMUSG00000006651	Aplp1	12.2648	12.1515	12.0382	11.8717	12.0879	12.1154	12.0136	12.5792	12.1628	12.0906	12.2424	12.1844	11.9645	11.869	12.0641	11.9669	11.9652	12.1319	12.9004	12.8783	12.9788	12.764	12.8222	12.6803	12.932	12.7695	13.0971	13.0868	13.0641	12.828	12.9089	13.0272	12.9262	13.0802	12.1515	12.025	12.2518	12.1725	11.9168	11.9987	12.9191	12.7555	12.9329	12.993	12.9681	13.0032	4377.38	-0.171824
ENSMUSG00000006673	Qrich1	9.21214	9.14256	9.14776	9.00573	9.25212	9.11465	8.98239	8.94891	9.02653	8.95949	8.96121	8.87332	8.89398	9.06954	8.93996	9.07876	8.98832	8.9297	9.6849	9.76573	9.70005	9.86983	9.84739	9.78834	9.85919	9.84194	9.80091	9.79182	9.85398	9.7415	9.83826	9.81403	9.8797	9.83523	9.16749	9.12417	8.98594	8.93134	8.98176	9.00234	9.71689	9.83519	9.83401	9.79577	9.82615	9.85746	566.277	-0.0492045
ENSMUSG00000006675	P4htm	8.74543	8.70867	8.63086	8.75725	8.5398	8.71678	8.49065	8.95854	8.65495	8.4995	8.67062	8.68982	8.47474	8.43738	8.56862	8.4856	8.48124	8.57225	9.34891	9.38136	9.33972	9.26844	9.29691	9.28254	9.32586	9.31468	9.45121	9.52572	9.51251	9.39673	9.47369	9.43355	9.50281	9.53502	8.69498	8.67128	8.70138	8.61998	8.45606	8.51182	9.35666	9.28263	9.36392	9.47832	9.45362	9.51891	413.055	-0.0476744
ENSMUSG00000006676	Usp19	9.07384	9.01884	8.92834	9.23919	8.97501	8.85441	8.72029	8.97411	8.72434	8.65818	8.6732	8.55278	8.52982	8.58009	8.62223	8.59854	8.5817	8.64654	9.44236	9.40898	9.49753	9.43344	9.48561	9.33309	9.60444	9.55834	9.51813	9.55567	9.51052	9.37262	9.53021	9.51239	9.47613	9.43009	9.00701	9.02287	8.80625	8.62805	8.55496	8.60082	9.44962	9.41738	9.5603	9.47961	9.5213	9.45311	523.939	0.0207327
ENSMUSG00000006678	Pola1	4.1366	4.18197	4.09201	4.32107	4.11328	4.08285	3.3354	3.21571	3.3258	3.37062	3.28769	3.35481	3.84573	3.78565	3.73112	3.82644	3.70888	3.72562	4.31941	4.31328	4.33284	4.38906	4.28507	4.31047	4.61194	4.5765	4.5906	4.4939	4.5634	4.55827	4.22854	4.29851	4.25855	4.25799	4.13686	4.1724	3.2923	3.3377	3.81569	3.75548	4.32184	4.3282	4.59301	4.53852	4.26352	4.25827	20.1427	0.296254
ENSMUSG00000006699	Cdc42	10.3062	10.3806	10.4801	10.5542	10.4298	10.4204	10.2333	9.68669	10.1534	10.3147	10.1866	10.1907	10.3167	10.3336	10.1354	10.3116	10.1791	10.0023	10.908	10.8548	10.773	10.9556	10.8497	11.0552	11.1179	11.0702	10.9385	10.8666	10.8652	11.0282	10.9028	10.9457	10.9427	10.7407	10.389	10.4681	10.0245	10.2307	10.3252	10.2087	10.8453	10.9535	11.0422	10.92	10.9243	10.8417	1383.63	0.109785
ENSMUSG00000006705	Pknox1	5.3275	5.46231	5.50683	5.41855	5.42561	5.39312	5.22707	5.27149	5.15447	5.19906	5.03882	5.28858	5.41472	5.45972	5.40451	5.42508	5.34333	5.34278	5.83476	5.88672	5.87759	5.89723	5.84932	5.87906	6.29916	6.27649	6.29557	6.26504	6.27006	6.25861	6.29487	6.46885	6.20349	6.16149	5.43221	5.41243	5.21768	5.17549	5.43722	5.39097	5.86635	5.8752	6.29041	6.26457	6.38186	6.18249	43.1658	-0.0890865
ENSMUSG00000006711	D130043K22Rik	8.94744	8.82268	8.91141	8.88186	8.82925	8.90551	8.85488	8.95128	8.79567	8.76299	8.74005	8.77071	8.42413	8.39528	8.65673	8.59521	8.44963	8.54683	9.45084	9.49228	9.4612	9.39336	9.56449	9.3203	9.64465	9.53873	9.62527	9.64541	9.59419	9.5064	9.4317	9.57601	9.53504	9.51254	8.89384	8.87221	8.86728	8.75792	8.4097	8.56719	9.46811	9.42605	9.60289	9.582	9.50386	9.52379	472.655	-0.0366321
ENSMUSG00000006715	Gmnn	4.1969	4.23255	4.24696	4.18885	4.2237	4.30338	4.02089	3.95434	3.94088	4.10477	4.02509	3.98421	4.56389	4.49862	4.50059	4.52442	4.52761	4.54946	4.72681	4.79934	4.76706	4.75286	4.71588	4.75062	5.04619	5.01521	5.00772	4.99493	4.92381	5.04631	5.01623	5.11112	5.05465	5.00985	4.22547	4.23865	3.97204	4.03802	4.53126	4.51754	4.76441	4.73979	5.02304	4.98835	5.06367	5.03225	18.3111	0.12783
ENSMUSG00000006717	Acot13	8.59131	8.61176	8.75683	8.83242	8.63007	8.72554	8.71455	8.35038	8.42676	8.58268	8.60393	8.50384	8.53207	8.51127	8.41264	8.492	8.39875	8.3639	9.16349	9.16435	9.16405	9.25062	9.05156	9.17023	9.51331	9.50648	9.53976	9.29456	9.41726	9.50679	9.57895	9.5173	9.52232	9.51822	8.6533	8.72934	8.49723	8.56348	8.52167	8.43447	9.16396	9.15747	9.51985	9.4062	9.54813	9.52027	417	0.116956
ENSMUSG00000006720	Zfp184	3.37721	3.36043	3.44217	3.40838	3.42285	3.40484	3.52628	3.49003	3.51489	3.5178	3.53136	3.74552	3.79654	3.7867	3.79643	3.77613	3.76905	3.74401	4.11637	4.04144	4.07544	4.09711	4.11893	4.07993	4.23889	4.26303	4.19952	4.1565	4.31925	4.31022	4.39789	4.4595	4.41919	4.40446	3.39327	3.41202	3.5104	3.59822	3.79162	3.78054	4.07775	4.09866	4.23381	4.26199	4.4287	4.41182	10.7808	0.236883
ENSMUSG00000006728	Cdk4	5.96329	5.90504	5.95363	6.01054	5.92715	5.87278	5.70325	5.54563	5.43959	5.56017	5.51755	5.75777	5.30384	5.47655	5.40797	5.32202	5.39854	5.39245	6.36728	6.27108	6.39884	6.39889	6.34721	6.33402	6.39921	6.45793	6.43562	6.42985	6.39369	6.41007	6.51956	6.58842	6.74699	6.71529	5.94065	5.93682	5.56282	5.61183	5.39019	5.37618	6.34573	6.36004	6.43092	6.4112	6.55399	6.73114	62.4576	-0.0296459
ENSMUSG00000006731	B4galnt1	7.91889	7.9514	7.84201	7.6929	7.82607	7.85027	7.7077	8.01912	7.8958	7.74905	7.89144	7.95626	7.56549	7.64984	7.75422	7.79876	7.70566	7.75391	8.42241	8.47638	8.6264	8.45634	8.57878	8.39684	8.5382	8.52801	8.69314	8.67953	8.60319	8.57504	8.58407	8.60337	8.60327	8.66753	7.9041	7.78975	7.87421	7.86559	7.60767	7.75288	8.50839	8.47732	8.58645	8.61925	8.59372	8.6354	229.039	-0.198318
ENSMUSG00000006732	Mettl1	4.9561	4.93532	4.91248	4.97316	4.95395	4.99229	4.68495	4.91816	4.80633	4.85347	4.80161	4.63039	4.49633	4.49416	4.43915	4.46118	4.48437	4.42651	5.47784	5.43406	5.50265	5.5338	5.5077	5.46912	5.64249	5.65019	5.57944	5.68939	5.59065	5.6006	5.51473	5.4605	5.48295	5.5097	4.93463	4.97313	4.80315	4.76182	4.49524	4.46157	5.47151	5.50354	5.62404	5.62688	5.48761	5.49632	31.1961	0.195179
ENSMUSG00000006736	Tspan31	6.87839	7.08355	6.85026	6.94053	7.08028	6.9427	6.9099	6.83548	6.75901	6.87201	6.86916	7.03601	6.5539	6.73333	6.72242	6.63034	6.72522	6.70024	7.41915	7.37479	7.44499	7.39996	7.40252	7.25107	7.6923	7.67285	7.82738	7.63045	7.67026	7.65329	7.47513	7.47104	7.49922	7.49381	6.9374	6.98784	6.8348	6.92572	6.64362	6.69266	7.41298	7.35118	7.73084	7.65134	7.47309	7.49651	124.906	0.112625
ENSMUSG00000006740	Kif5b	9.54028	9.60171	9.76429	9.61701	9.6855	9.61695	9.43228	9.07829	9.45815	9.42412	9.25889	9.33733	9.76417	9.64941	9.45849	9.5476	9.57332	9.47197	10.0841	10.1572	9.95293	10.1405	10.028	10.2755	10.417	10.4525	10.1502	10.1555	10.2264	10.416	10.2815	10.2696	10.2538	10.19	9.63543	9.63982	9.32291	9.34011	9.70679	9.52647	10.0647	10.148	10.3399	10.266	10.2756	10.2219	798.427	0.00592244
ENSMUSG00000006763	Saal1	5.24783	5.27508	5.34066	5.36485	5.30035	5.20254	5.21614	5.35588	5.1794	5.327	5.35453	5.56761	5.16852	5.15283	5.22411	5.12341	5.11833	5.18806	5.78951	5.80507	5.84394	5.78961	5.87838	5.82486	5.87435	5.8596	5.87095	5.85404	5.87261	5.80267	5.94626	5.96022	5.90825	5.88957	5.28786	5.28925	5.25047	5.41638	5.16067	5.15528	5.81284	5.83095	5.8683	5.84311	5.95324	5.89891	40.3706	-0.00711736
ENSMUSG00000006782	Cnp	7.03712	6.80731	7.04892	6.80735	6.90247	7.19387	6.81065	6.90976	6.70704	6.79317	6.87303	6.86418	6.66303	6.67693	6.64551	6.71359	6.6357	6.76902	7.43413	7.49387	7.37956	7.4205	7.45517	7.51811	7.84158	8.11188	7.91141	8.07355	7.94357	7.95118	8.218	7.99512	8.28885	8.33899	6.96445	6.9679	6.80915	6.84346	6.66998	6.66493	7.43585	7.46459	7.95496	7.98943	8.10656	8.31392	124.952	0.04017
ENSMUSG00000006784	Ttc25	3.01445	3.0846	3.05103	3.0094	3.0506	3.00996	3.04701	3.19698	2.97607	3.05624	3.03341	3.04457	2.83852	2.88753	2.80699	2.84151	2.83305	2.86986	3.78273	3.77635	3.76589	3.72518	3.75261	3.67389	3.81532	3.87589	3.81075	3.81145	3.77191	3.89479	3.88153	3.89419	3.87281	3.90569	3.05002	3.02332	3.07336	3.04474	2.86303	2.82719	3.77499	3.71723	3.83398	3.82605	3.88786	3.88925	7.89547	-0.421709
ENSMUSG00000006800	Sulf2	9.06793	8.85066	8.88976	8.6381	8.8063	8.98371	8.75612	8.92944	8.76254	8.69327	8.73116	8.78656	8.79326	8.67212	8.72173	8.76838	8.73004	8.62456	9.71347	9.67351	9.7811	9.63437	9.69216	9.34582	9.72086	9.55035	9.68974	9.66989	9.7092	9.59835	9.67235	9.77119	9.60921	9.67141	8.93612	8.80937	8.81603	8.737	8.73269	8.74005	9.72269	9.55745	9.65365	9.65914	9.72177	9.64031	469.977	-0.184072
ENSMUSG00000006818	Sod2	9.68113	9.71652	9.75587	9.70932	9.72487	9.75801	9.55351	9.3858	9.49383	9.45293	9.48428	9.30574	9.53954	9.53493	9.49437	9.58699	9.55908	9.48678	10.29	10.2022	10.2068	10.3229	10.2074	10.2845	10.4352	10.4524	10.4142	10.2862	10.3676	10.4222	10.3734	10.4076	10.3759	10.3708	9.71784	9.73074	9.47771	9.41432	9.53723	9.54681	10.233	10.2716	10.4339	10.3587	10.3905	10.3733	846.012	0.0225585
ENSMUSG00000006850	Tmco6	4.4476	4.41071	4.40222	4.35357	4.45876	4.39163	4.03561	4.2387	4.24235	4.15719	4.11543	4.19039	3.99575	4.10201	4.04704	4.00361	4.07058	4.11008	4.73651	4.83696	4.79065	4.74527	4.78693	4.77924	4.92196	4.93259	4.96263	4.97159	5.01909	4.96032	4.9801	5.06135	5.01044	4.99977	4.42017	4.40132	4.17222	4.15434	4.04888	4.04041	4.78804	4.77048	4.93906	4.98367	5.02072	5.00511	20.5671	-0.10948
ENSMUSG00000006906	Stambp	7.19403	7.30458	7.3822	7.38021	7.35459	7.25101	7.24992	6.902	7.15568	7.0553	7.01153	7.00829	7.06686	7.04582	6.97098	6.9936	6.93638	6.98838	7.73583	7.73941	7.75141	7.82931	7.59661	7.80432	7.88172	7.95451	7.89027	7.81466	7.82531	7.92798	7.98499	7.98884	7.95933	7.98039	7.2936	7.3286	7.10253	7.02504	7.05634	6.96699	7.74222	7.74341	7.90884	7.85598	7.98692	7.96986	160.368	0.0649135
ENSMUSG00000006920	Ezh1	7.9621	7.98197	7.94798	7.83194	7.93794	7.93845	7.9442	7.77252	7.97754	7.79818	7.83108	7.9828	8.06104	7.9489	8.03112	8.10911	8.03345	7.97564	8.65621	8.7673	8.51128	8.70857	8.73013	8.79766	8.76565	8.69065	8.63692	8.72453	8.66689	8.71089	8.87533	8.81361	8.73571	8.76068	7.96402	7.90278	7.89809	7.87069	8.00497	8.05789	8.64493	8.74545	8.69774	8.70077	8.84447	8.7482	243.442	-0.0986281
ENSMUSG00000006930	Hap1	8.35707	8.53053	8.33435	8.5099	8.28248	8.40728	8.22592	8.54148	8.16835	8.24019	8.52513	8.16573	8.07731	8.18127	8.19429	8.13245	8.27507	8.31054	9.05729	8.96515	8.96477	9.03487	8.88032	8.93881	9.04523	9.21233	9.28665	9.27496	9.25329	9.24504	9.59362	9.36077	9.46454	9.6756	8.40732	8.39989	8.31192	8.31035	8.12929	8.20061	8.99574	8.95133	9.1814	9.25776	9.4772	9.57007	341.306	-0.0297447
ENSMUSG00000006931	P3h4	3.65279	3.59699	3.61392	3.67277	3.56621	3.68399	3.93065	3.99086	3.96112	3.93173	3.95907	3.89676	3.69593	3.56894	3.65901	3.73008	3.70088	3.66629	4.652	4.47256	4.58481	4.52965	4.62239	4.54259	4.61291	4.63427	4.70289	4.58991	4.66191	4.59	4.68924	4.67363	4.65625	4.77449	3.62123	3.64099	3.96088	3.92919	3.63244	3.69666	4.56979	4.56488	4.65002	4.61394	4.68143	4.71537	12.9778	0.21134
ENSMUSG00000006932	Ctnnb1	11.4024	11.4641	11.2115	11.3501	11.2829	11.2512	11.2196	11.2066	11.1745	11.2107	11.1677	11.089	10.9159	11.1094	11.0666	10.9635	11.063	11.1036	11.8046	11.6639	11.7801	11.6268	11.7161	11.6701	11.8102	11.9455	11.967	11.7531	11.7962	11.936	11.8853	11.8809	11.9849	11.8899	11.3593	11.2947	11.2002	11.1558	11.0126	11.031	11.7495	11.671	11.9076	11.8284	11.8831	11.9374	2577.64	-0.100526
ENSMUSG00000006941	Eif1b	8.29171	8.20748	8.14883	7.98178	8.13469	8.21977	8.14176	8.19063	8.24991	8.06034	8.2465	8.35362	8.28563	8.07614	8.23085	8.14976	8.30666	8.23778	8.76226	8.79222	8.78383	8.69136	8.7141	8.85521	8.752	8.83411	8.8612	8.85486	8.97146	8.85634	8.92137	8.88168	8.95156	9.05612	8.21601	8.11208	8.1941	8.22015	8.18089	8.22909	8.77944	8.75356	8.81577	8.89422	8.90152	9.00384	285.809	-0.163249
ENSMUSG00000006958	Chrd	4.21746	4.17744	4.16789	4.08381	4.19885	4.16255	4.25943	4.37208	4.21399	4.20602	4.18395	4.26689	3.8757	3.82837	3.88332	3.85881	3.83621	3.89624	4.91069	4.98116	4.98831	4.84608	4.86232	4.93	5.05286	5.11742	5.11056	5.12934	5.11752	5.13439	5.192	5.20164	5.24966	5.30642	4.18759	4.14841	4.28183	4.21896	3.85204	3.85945	4.96005	4.87947	5.09361	5.12709	5.19682	5.27804	16.9533	-0.289367
ENSMUSG00000006998	Psmd2	9.11088	9.05328	9.02422	8.9586	9.13728	8.95262	8.88933	9.01604	8.98959	8.9156	8.85364	8.88259	9.01212	9.00677	8.97375	8.93647	9.01966	9.01075	9.51084	9.67439	9.63515	9.81167	9.72801	9.74826	9.65637	9.78893	9.53405	9.73942	9.63708	9.72424	9.73213	9.59652	9.86905	9.90445	9.06279	9.01617	8.96499	8.88394	9.00944	8.97663	9.6068	9.76265	9.65978	9.70025	9.66433	9.88675	526.379	-0.0636902
ENSMUSG00000007021	Syngr3	8.70708	8.70202	8.59154	8.46206	8.52796	8.76056	8.5301	8.77311	8.49791	8.63221	8.66245	8.56255	8.41276	8.47531	8.69232	8.42634	8.50886	8.7051	9.32166	9.25889	9.38807	9.19936	9.17582	9.05252	9.26172	9.31238	9.52609	9.54296	9.45289	9.28532	9.35199	9.46958	9.3789	9.37351	8.66688	8.58353	8.60037	8.61907	8.44403	8.54251	9.32288	9.14257	9.36673	9.42706	9.41078	9.3762	394.873	-0.116427
ENSMUSG00000007029	Vars	7.33545	7.02532	7.10275	7.16343	7.08612	7.19438	6.8548	7.04275	6.94757	6.84284	6.94062	6.96034	6.71994	6.77917	6.92705	6.7674	6.8783	6.77727	7.7015	7.86643	7.81201	7.76443	7.74629	7.75689	7.57443	7.66423	7.73028	7.75219	7.71878	7.61427	7.65041	7.57475	7.69008	7.79461	7.1545	7.14798	6.94837	6.9146	6.74955	6.85758	7.79331	7.75587	7.65631	7.69508	7.61258	7.74234	143.216	-0.0327667
ENSMUSG00000007034	Slc44a4	NA	NA	NA	NA	NA	NA	NA	NA	NA	NA	NA	NA	NA	NA	NA	NA	NA	NA	2.21506	2.17544	2.17433	2.15284	2.17433	2.19725	2.21103	2.19991	2.21075	2.22998	2.17572	2.19492	NA	NA	NA	NA	NA	NA	NA	NA	NA	NA	2.18828	2.17481	2.20723	2.20021	NA	NA	NA	NA
ENSMUSG00000007036	Abhd16a	8.30534	8.31585	8.26397	8.22203	8.1876	8.23114	8.06379	8.41529	8.11286	8.13528	8.30807	8.11645	8.06121	7.92354	8.12844	7.9583	7.89897	8.12893	8.85804	8.67402	8.90206	8.62756	8.76235	8.75177	8.80619	8.80273	8.98199	8.90463	8.77685	8.94495	8.64254	8.70499	8.74099	8.78448	8.29505	8.21359	8.19731	8.1866	7.99238	7.99524	8.81137	8.71389	8.86363	8.87548	8.67377	8.76273	305.266	-0.14645
ENSMUSG00000007038	Neu1	7.63597	7.56906	7.3624	7.68104	7.46382	7.44276	7.36599	7.91597	7.45234	7.35626	7.62448	7.41897	7.34131	7.24062	7.52118	7.41296	7.31694	7.53219	8.15589	8.22679	8.37085	8.28727	8.23324	8.10376	8.12151	8.09427	8.38248	8.36296	8.33171	8.19768	8.25227	8.17936	8.44616	8.55063	7.52248	7.52921	7.5781	7.46657	7.29097	7.41703	8.25118	8.20809	8.19942	8.29745	8.21581	8.4984	187.422	-0.0144395
ENSMUSG00000007039	Ddah2	NA	NA	NA	NA	NA	NA	2.26415	2.25274	2.2734	2.28491	2.28069	2.29826	NA	NA	NA	NA	NA	NA	2.81806	2.79453	2.78106	2.80325	2.73705	2.7687	3.13087	3.20283	3.15974	3.22508	3.17824	3.19557	3.65746	3.70421	3.66891	3.72218	NA	NA	2.26343	2.28795	NA	NA	2.79788	2.76966	3.16448	3.19963	3.68083	3.69554	NA	NA
ENSMUSG00000007041	Clic1	2.42068	2.41088	2.40025	2.5025	2.45217	2.43663	1.81536	1.87647	1.81364	1.79377	1.84842	1.87426	1.90922	1.94155	1.96164	1.92217	1.95602	1.93653	2.82155	2.86986	2.85778	2.81867	2.87155	2.83449	3.48864	3.51785	3.52972	3.53328	3.60325	3.60415	4.02667	4.02315	4.06849	4.10438	2.4106	2.46377	1.83516	1.83882	1.92539	1.94661	2.84973	2.84157	3.51207	3.58023	4.02491	4.08643	6.24906	1.1445
ENSMUSG00000007050	Lsm2	5.47675	5.40567	5.45231	5.2435	5.41729	5.472	5.5849	5.58742	5.49502	5.4665	5.57667	5.50003	5.48791	5.45273	5.52873	5.45503	5.32597	5.41444	6.31197	6.23992	6.23327	6.29128	6.23242	6.19517	6.51658	6.45324	6.48354	6.51072	6.53991	6.48156	6.44081	6.49676	6.52041	6.53762	5.44491	5.37759	5.55578	5.5144	5.47032	5.43658	6.26172	6.23963	6.48446	6.51073	6.46878	6.52901	40.7828	-0.245428
ENSMUSG00000007080	Pole	3.18717	3.16176	3.16615	3.10469	3.17288	3.16516	2.94402	2.86812	2.91699	2.88884	2.94778	2.99176	3.02982	3.05483	3.06177	2.9857	3.08152	2.96486	4.06023	4.06907	4.00842	4.06309	4.07327	4.03551	3.80091	3.82638	3.88215	3.77156	3.81295	3.8964	3.75105	3.691	3.76249	3.79597	3.17169	3.14758	2.90971	2.9428	3.04233	3.043	4.04591	4.05729	3.83648	3.82697	3.72103	3.77923	8.25837	-0.333235
ENSMUSG00000007097	Atp1a2	8.84007	8.60204	8.60919	8.44696	8.63355	8.84199	9.44459	9.29342	9.36257	8.94084	9.31584	10.3389	8.42284	8.21187	8.29445	8.39003	8.27336	8.32594	9.48065	9.36169	9.37133	9.32863	9.32374	9.33945	9.7651	9.98495	9.90984	10.2853	10.0759	9.92882	9.97665	9.95435	10.3211	10.4274	8.68377	8.64083	9.36686	9.53187	8.31735	8.31928	9.40456	9.33061	9.88663	10.0967	9.9655	10.3742	406.275	-0.0482348
ENSMUSG00000007207	Stx1a	10.5683	10.4893	10.5386	10.3267	10.4555	10.5127	10.4556	10.6494	10.462	10.4274	10.5228	10.4036	10.3825	10.3018	10.3699	10.4386	10.3359	10.3633	11.2073	11.1942	11.0545	11.1254	11.1213	11.072	11.1346	11.1622	11.0983	11.1923	11.1383	11.1373	11.1606	11.1807	11.1451	11.0875	10.532	10.4316	10.5223	10.4513	10.3422	10.3815	11.152	11.1062	11.1317	11.156	11.1706	11.1163	1431.86	-0.13496
ENSMUSG00000007216	Zfp775	3.25171	3.21692	3.26742	3.2172	3.21908	3.19463	2.8771	3.06704	2.9865	2.98647	2.99515	2.97053	3.48454	3.48784	3.44444	3.47652	3.47347	3.58503	3.37721	3.39365	3.39994	3.37056	3.40569	3.39926	3.27338	3.30103	3.34875	3.39007	3.35093	3.28101	3.98158	3.91429	3.92824	3.96641	3.24535	3.2103	2.97688	2.98405	3.48619	3.46481	3.39027	3.39184	3.30772	3.34067	3.94794	3.94732	9.3451	-0.501479
ENSMUSG00000007279	Scube2	NA	NA	NA	NA	NA	NA	NA	NA	NA	NA	NA	NA	NA	NA	NA	NA	NA	NA	2.12923	2.10492	2.11829	2.12666	2.10535	2.12391	1.86133	1.86431	1.92325	1.90668	1.86936	1.90831	2.70533	2.70264	2.70958	2.72102	NA	NA	NA	NA	NA	NA	2.11748	2.11864	1.88296	1.89478	2.70399	2.7153	NA	NA
ENSMUSG00000007338	Mrpl49	6.52064	6.39089	6.45412	6.27805	6.40367	6.6251	6.3791	6.27182	6.47701	6.45402	6.41026	6.25165	6.33992	6.42016	6.41051	6.34481	6.38277	6.35851	7.14172	7.17724	7.16741	7.11686	7.10487	7.14345	7.24603	7.29162	7.23499	7.2916	7.2401	7.32393	7.28752	7.30056	7.33526	7.26013	6.45522	6.43561	6.37598	6.37198	6.38004	6.37936	7.16213	7.12173	7.25755	7.28521	7.29404	7.29769	85.856	-0.0109082
ENSMUSG00000007411	Mark3	8.56542	8.55203	8.66775	8.76726	8.67004	8.5782	8.40925	8.27508	8.44119	8.5254	8.32529	8.46144	8.50045	8.45303	8.36389	8.34683	8.46733	8.44208	9.00286	9.00265	8.95905	9.07639	8.96107	9.08586	9.12308	9.15514	8.96371	8.92669	8.98535	9.12995	9.01821	9.09674	9.02212	9.00917	8.59507	8.67183	8.37517	8.43738	8.47674	8.39269	8.98819	9.04111	9.08064	9.014	9.05748	9.01565	400.185	0.119059
ENSMUSG00000007415	Gatad1	6.99784	7.049	7.04381	6.83388	7.04829	7.18113	6.88361	6.85858	6.96738	6.94215	7.05277	7.03701	6.78142	6.90162	6.85362	6.89256	6.93338	6.87038	7.73064	7.669	7.68792	7.60886	7.63158	7.65549	7.93014	7.56857	7.66947	7.70002	7.75031	7.66638	7.62193	7.7505	7.47476	7.49887	7.03021	7.0211	6.90319	7.01064	6.84152	6.89319	7.69585	7.63198	7.72273	7.70557	7.68622	7.48681	128.754	0.0255368
ENSMUSG00000007440	Pcdha11	6.05084	6.10262	5.89975	6.02356	6.10427	5.95663	6.17318	6.15539	6.09011	6.185	5.93409	5.98309	6.16171	6.15647	6.23836	6.18575	6.15075	6.16278	6.97909	7.03375	6.93195	7.0189	7.0417	6.928	7.19067	7.24037	7.06358	7.25329	7.17444	7.04726	6.7311	6.6393	6.4891	6.52146	6.01774	6.02815	6.13956	6.03406	6.15909	6.19162	6.98159	6.9962	7.16487	7.15833	6.6852	6.50528	65.119	0.0229199
ENSMUSG00000007458	M6pr	7.69601	7.55212	7.6405	7.68692	7.65207	7.75484	7.63263	7.59061	7.54584	7.51635	7.6058	7.53666	7.55824	7.41386	7.51311	7.4984	7.3962	7.44133	8.36338	8.43148	8.41816	8.13945	8.29304	8.29939	8.40375	8.36083	8.48634	8.44653	8.42653	8.41602	8.38283	8.47624	8.40603	8.52472	7.62954	7.69794	7.58969	7.55294	7.48605	7.46924	8.40434	8.24396	8.41697	8.42969	8.42953	8.46537	203.531	0.135796
ENSMUSG00000007564	Ppp2r1a	11.5597	11.596	11.4254	11.452	11.4369	11.4286	11.398	11.6019	11.408	11.4054	11.4372	11.3877	11.03	11.2416	11.3259	11.2984	11.2978	11.3513	12.1043	11.9929	12.1491	11.9122	12.0756	11.9794	12.0221	12.2321	12.2035	12.0878	12.1417	12.13	12.1134	12.0915	12.3646	12.2012	11.527	11.4392	11.4693	11.4101	11.1358	11.3074	12.0821	11.989	12.1526	12.1198	12.1024	12.2829	2867.82	-0.128323
ENSMUSG00000007570	Fance	2.54197	2.5762	2.5374	2.62674	2.53281	2.57647	2.7308	2.74077	2.69972	2.7084	2.74134	2.64212	2.83758	2.77858	2.83756	2.78913	2.83481	2.80553	4.04387	4.0226	4.01659	4.00639	4.0298	3.98826	3.75578	3.8134	3.89381	3.84775	3.82307	3.77159	3.70369	3.73754	3.71932	3.76233	2.55186	2.57867	2.72377	2.69728	2.80808	2.8205	4.02769	4.00815	3.821	3.81414	3.72062	3.74082	6.69841	0.522445
ENSMUSG00000007589	Tinf2	4.12777	4.17494	4.10215	4.12039	4.1066	4.16959	4.10425	3.99732	3.97908	4.02395	3.98414	3.83131	4.39064	4.35391	4.40325	4.3501	4.47644	4.3935	5.05324	5.11802	5.14837	5.15123	5.04742	5.12789	4.89929	4.81137	4.81767	4.89496	4.81782	4.83691	4.83892	4.8395	4.79758	4.84259	4.13495	4.13219	4.02688	3.94647	4.37228	4.40993	5.10654	5.10885	4.84278	4.8499	4.83921	4.82009	17.3288	-0.021301
ENSMUSG00000007594	Hapln4	8.64356	8.39911	8.32117	8.39511	8.37171	8.41926	8.27657	8.89049	8.29444	8.22555	8.47121	8.29375	7.99532	8.00384	8.24075	8.04986	8.09728	8.29025	8.9841	8.97383	9.31512	9.0358	9.13666	8.77424	9.13797	9.22976	9.24814	9.2807	9.14366	8.95727	9.0777	9.14043	9.06629	9.03528	8.45461	8.39536	8.48717	8.33017	7.99958	8.1293	9.09101	8.98223	9.20529	9.12721	9.10907	9.05079	345.085	-0.118509
ENSMUSG00000007603	Dus3l	6.85596	6.75409	6.78124	6.99797	6.78593	6.76288	6.50729	6.72289	6.58294	6.63736	6.59554	6.64669	6.4288	6.58129	6.60633	6.65125	6.73982	6.78008	7.37247	7.25659	7.37434	7.12225	7.26183	7.16573	7.38186	7.44042	7.46733	7.35628	7.39672	7.41989	7.3268	7.47794	7.41133	7.40321	6.7971	6.84893	6.60438	6.62653	6.50504	6.6658	7.33447	7.18327	7.42987	7.39096	7.40237	7.40727	116.095	0.103728
ENSMUSG00000007610	Gtpbp3	5.0515	5.09643	5.05339	5.10075	5.10444	5.04827	5.02686	5.20446	5.00264	4.87262	5.07755	5.08679	4.88787	4.82789	4.94175	4.90407	4.87896	4.93036	5.66996	5.75479	5.84725	5.72065	5.75264	5.62908	5.55166	5.57245	5.66798	5.64101	5.54741	5.53092	5.79157	5.86233	5.76556	5.86217	5.06711	5.08449	5.07799	5.01232	4.85788	4.90826	5.75733	5.70079	5.59736	5.57311	5.82695	5.81386	34.0364	0.0762589
ENSMUSG00000007613	Tgfbr1	4.4929	4.41879	4.35012	4.39278	4.43206	4.34056	4.20364	4.2523	4.28312	4.1253	4.18192	4.23451	4.30165	4.264	4.29879	4.23945	4.40837	4.26525	4.91517	4.95168	4.8978	4.90058	4.88252	4.90614	5.16213	5.11476	5.12969	5.17815	5.23373	5.19948	5.46272	5.54845	5.57078	5.56603	4.4206	4.38847	4.24636	4.18058	4.28283	4.31554	4.92155	4.89641	5.13553	5.20379	5.50558	5.56841	21.044	-0.234994
ENSMUSG00000007617	Homer1	9.88032	9.83591	9.94781	9.70725	9.97374	9.80466	9.78621	9.54063	10.089	9.82172	9.50043	10.2946	10.0182	9.99987	9.72358	9.97832	9.90007	9.75649	10.3368	10.3885	10.3623	10.5483	10.4999	10.2877	10.8602	10.8051	10.4465	10.5072	10.8098	10.7574	10.6431	10.9998	10.4823	10.436	9.88801	9.82855	9.80529	9.87226	10.0091	9.86733	10.3625	10.4453	10.7039	10.6915	10.8215	10.4591	929.788	-0.0720762
ENSMUSG00000007646	Rad51c	3.90753	3.87758	3.77859	3.86	3.90284	3.80214	3.71149	3.63542	3.74974	3.7631	3.78832	3.6559	4.10505	4.17033	4.03419	4.16068	4.11556	4.1749	4.53633	4.45099	4.51825	4.43664	4.4856	4.52681	4.95414	5.03438	4.87538	4.83249	4.95918	5.00094	4.83827	4.87555	4.85408	4.7951	3.85457	3.855	3.69889	3.73577	4.13769	4.10348	4.50186	4.48301	4.95463	4.93087	4.85691	4.82459	14.4843	-0.00685539
ENSMUSG00000007653	Gabrb2	11.041	11.0711	11.2287	11.2147	11.0493	11.2302	10.9669	10.6718	10.8038	10.9205	10.862	10.7162	10.828	10.852	10.7579	10.907	10.7009	10.6589	11.5291	11.4935	11.6743	11.5261	11.6723	11.5947	11.8385	11.7269	11.7678	11.6243	11.6007	11.5943	11.4844	11.6096	11.4015	11.4433	11.1136	11.1648	10.8142	10.8329	10.84	10.7886	11.5656	11.5977	11.7777	11.6065	11.547	11.4224	2263.8	0.0715774
ENSMUSG00000007655	Cav1	2.59606	2.61577	2.59993	2.56295	2.59717	2.63258	1.94305	2.00306	1.93767	2.04448	1.99242	2.02293	2.73033	2.70822	2.726	2.73442	2.73262	2.68004	3.0642	3.05693	3.0361	3.04855	3.05398	3.07562	3.7547	3.78961	3.77636	3.75887	3.74309	3.7601	3.96226	3.97093	3.94698	3.96955	2.60392	2.59757	1.96126	2.01994	2.71927	2.73101	3.05241	3.05938	3.77356	3.75402	3.9666	3.95827	5.57675	-0.10406
ENSMUSG00000007656	Arpp19	10.2654	10.2642	10.5701	10.0519	10.3413	10.4963	10.3504	10.165	10.1858	10.4011	10.236	10.1476	10.5397	10.3789	10.3826	10.3144	10.3527	10.3885	10.9914	11.036	11.0195	10.9759	10.9639	11.0588	11.0354	11.1055	10.8739	10.7876	10.9411	10.977	10.9684	10.908	10.9177	10.6537	10.3666	10.2965	10.2337	10.2615	10.4593	10.3499	11.0156	10.9995	11.0049	10.9019	10.9382	10.7857	1301.68	-0.0874212
ENSMUSG00000007659	Bcl2l1	7.23009	7.16834	7.18487	7.17523	7.18116	7.19859	7.0953	7.33466	7.34141	7.13564	7.22459	7.12591	7.19902	7.04456	7.15237	7.08804	7.19747	7.21239	7.96138	8.13129	8.04902	8.13062	8.03032	7.96147	7.92643	7.97584	7.97471	8.11351	8.09801	7.91756	7.99029	7.92008	8.09989	8.18001	7.19443	7.18499	7.25712	7.16204	7.12179	7.14596	8.04723	8.0408	7.959	8.04303	7.95518	8.13995	145.837	-0.0189047
ENSMUSG00000007670	Khsrp	8.64767	8.6547	8.56479	8.45251	8.60523	8.51115	8.44376	8.62645	8.44494	8.41602	8.36625	8.52007	8.34354	8.2274	8.26185	8.29684	8.35152	8.40206	9.20722	9.09722	9.29763	9.12179	9.1741	9.02198	9.20008	9.18463	9.28989	9.26968	9.34931	9.22133	9.20633	9.33144	9.26322	9.19148	8.62239	8.52297	8.50505	8.43411	8.28547	8.3034	9.20069	9.10596	9.22487	9.28011	9.26889	9.22735	380.157	-0.156407
ENSMUSG00000007682	Dio2	2.83041	2.8562	2.80511	2.83412	2.84966	2.80834	3.30853	3.30429	3.34715	3.27326	3.31752	3.48178	2.86705	2.85411	2.81944	2.8476	2.84614	2.92743	3.43199	3.4563	3.43176	3.43427	3.47297	3.46462	4.1167	4.12979	4.16804	4.11386	4.19894	4.09269	4.0349	3.99175	4.04202	4.01995	2.83057	2.83071	3.31999	3.35752	2.86058	2.83773	3.44002	3.45728	4.13818	4.13517	4.01333	4.03098	7.1156	-0.00820527
ENSMUSG00000007721	Ccdc124	7.25141	7.14572	7.21529	6.88018	7.07699	7.27227	7.27253	7.50158	7.15309	7.2205	7.25725	7.13856	6.94962	6.86898	6.96466	7.007	7.00496	7.09329	7.92866	7.90458	7.97918	7.83769	7.84517	7.82832	7.76957	7.89976	7.91312	7.84586	7.87569	7.78536	7.84782	7.89876	7.9324	7.97511	7.20414	7.07648	7.30907	7.20544	6.9093	6.9922	7.93747	7.83706	7.86081	7.83564	7.87329	7.95375	139.463	-0.237114
ENSMUSG00000007739	Cct4	9.8523	9.96073	9.8823	9.96368	9.83067	9.98319	9.82102	9.2927	9.72757	9.844	9.65556	9.88616	9.80821	9.76133	9.69568	9.66908	9.74358	9.64676	10.2935	10.2736	10.385	10.274	10.2674	10.3846	10.6093	10.6843	10.5522	10.3225	10.5115	10.6708	10.5672	10.549	10.441	10.2595	9.89844	9.92585	9.61376	9.79524	9.78477	9.70278	10.3174	10.3087	10.6153	10.5016	10.5581	10.3502	965.624	0.0388343
ENSMUSG00000007777	0610009B22Rik	5.66155	5.81599	5.83617	5.70142	5.82223	5.87798	5.81296	5.61136	5.67563	5.69131	5.7287	5.88791	5.75984	5.71251	5.67905	5.6519	5.66578	5.71128	6.33979	6.46963	6.5004	6.45446	6.42919	6.46248	6.66779	6.68803	6.58576	6.53277	6.57412	6.55286	6.37161	6.38496	6.45434	6.39035	5.77123	5.80054	5.69998	5.76931	5.73617	5.66558	6.43661	6.44871	6.64719	6.55325	6.37829	6.42234	54.5055	0.12265
ENSMUSG00000007783	Cpt1c	8.32993	8.37234	8.23505	8.47772	8.36961	8.15353	8.13097	8.46419	8.2644	8.22791	8.24323	8.38254	7.96843	8.10711	8.2658	8.18511	8.13005	8.11256	8.89476	8.84095	8.89058	8.80965	9.00044	8.84988	8.97966	8.97631	9.1093	9.11913	9.07738	9.00298	9.10133	8.981	9.13375	9.14575	8.31244	8.33362	8.28652	8.28456	8.03777	8.19365	8.87543	8.88666	9.02176	9.0665	9.04117	9.13975	323.942	0.0280026
ENSMUSG00000007805	Twist2	1.81707	1.81065	1.82767	1.85447	1.84795	1.805	NA	NA	NA	NA	NA	NA	1.55242	1.5487	1.59172	1.58841	1.53071	1.54305	2.15451	2.17098	2.17123	2.14132	2.15377	2.17089	2.21365	2.15723	2.17742	2.19865	2.18695	2.20102	2.32585	2.35675	2.34271	2.30683	1.81846	1.83581	NA	NA	1.55056	1.57028	2.16557	2.15533	2.18277	2.19554	2.3413	2.32477	3.93163	0.563047
ENSMUSG00000007812	Zfp655	7.77463	7.88091	7.94922	7.72394	7.94691	8.00799	7.80909	7.26778	7.62325	7.78029	7.642	7.57313	7.97453	7.84908	7.77654	7.71223	7.78657	7.76849	8.41204	8.36955	8.36173	8.30648	8.21705	8.49732	8.56133	8.40474	8.47642	8.34541	8.45987	8.68341	8.40882	8.4659	8.25809	8.21933	7.86825	7.89295	7.56671	7.66514	7.91181	7.75844	8.38111	8.34028	8.48083	8.49623	8.43736	8.23871	235.106	0.0780627
ENSMUSG00000007815	Rhoa	7.96336	7.92438	7.74053	7.85911	7.83815	7.78317	7.65074	7.98801	7.77792	7.63078	7.79183	7.94925	7.51031	7.60916	7.62681	7.66348	7.57501	7.66349	8.36092	8.30618	8.4695	8.50252	8.52409	8.37019	8.6006	8.62412	8.74969	8.79686	8.7692	8.74778	8.8079	8.68276	8.81984	8.94906	7.87609	7.82681	7.80556	7.79062	7.55973	7.62177	8.37886	8.4656	8.65814	8.77128	8.74533	8.88445	231.59	-0.110537
ENSMUSG00000007817	Zmiz1	8.81387	8.7457	8.59672	8.53942	8.70441	8.50712	8.54535	8.71571	8.75783	8.52928	8.47023	8.74588	8.39363	8.51647	8.55624	8.53838	8.54194	8.49002	9.31254	9.33484	9.31629	9.35889	9.44577	9.29855	9.46288	9.45699	9.43771	9.44388	9.43548	9.35049	9.5066	9.38927	9.39597	9.49889	8.71877	8.58365	8.67296	8.58179	8.45505	8.54552	9.32123	9.36774	9.45253	9.40995	9.44793	9.44743	403.019	-0.22323
ENSMUSG00000007827	Ankrd26	6.76289	6.80896	6.87606	6.64678	6.88258	6.85931	6.86358	6.53104	6.78119	6.79474	6.66149	6.61433	6.8098	6.80764	6.81448	6.81394	6.78513	6.81898	7.3914	7.27948	7.18583	7.27073	7.29361	7.34879	7.68066	7.49344	7.50936	7.42022	7.54962	7.65288	7.32163	7.42959	7.26418	7.28119	6.81597	6.79622	6.72527	6.69019	6.80872	6.80452	7.28557	7.30438	7.56115	7.54091	7.37561	7.27269	110.516	-0.0100931
ENSMUSG00000007833	Aldh16a1	3.65195	3.64264	3.62633	3.64867	3.61171	3.60236	3.32406	3.55952	3.37322	3.35734	3.37341	3.35416	3.49916	3.45015	3.51893	3.48907	3.45916	3.44267	4.34965	4.29152	4.32111	4.35864	4.30376	4.28244	4.32591	4.2949	4.27371	4.36902	4.26847	4.39225	4.81191	4.81657	4.89877	4.83759	3.64031	3.62091	3.41893	3.36163	3.47465	3.48905	4.32076	4.31494	4.29817	4.34325	4.81424	4.86818	12.6268	-0.23114
ENSMUSG00000007836	Hnrnpa0	8.61862	8.70738	8.46935	8.95536	8.59855	8.3617	8.31785	8.59976	8.21204	8.34839	8.39643	8.25974	7.82897	8.02258	8.19466	8.01944	8.06577	8.39449	8.81379	8.593	9.09613	8.58018	8.65309	8.54239	8.88689	8.95601	9.38859	8.95857	8.96301	9.00192	8.77568	8.92672	8.88788	8.86353	8.59845	8.63854	8.37655	8.33486	7.92577	8.09329	8.83431	8.59188	9.07716	8.9745	8.8512	8.8757	404.382	0.0876292
ENSMUSG00000007837	Prrg2	2.77599	2.77195	2.79744	2.73905	2.80275	2.80407	2.79548	2.8229	2.65384	2.79537	2.79559	2.8172	2.24994	2.18794	2.19186	2.19584	2.17205	2.24548	3.45801	3.46667	3.49216	3.46198	3.43135	3.44702	3.25506	3.21792	3.19243	3.23423	3.21205	3.24727	3.21633	3.25654	3.25249	3.27761	2.78179	2.78196	2.75741	2.80272	2.21894	2.18658	3.47228	3.44678	3.22181	3.23118	3.23643	3.26505	6.37229	0.03692
ENSMUSG00000007850	Hnrnph1	9.52772	9.53427	9.49536	9.8101	9.55501	9.52944	9.46606	9.09871	9.41945	9.40427	9.30213	9.53289	9.46497	9.5381	9.31879	9.48615	9.3676	9.24788	10.1096	10.0398	10.1197	10.2032	10.0195	10.0613	10.3831	10.4938	10.3884	10.1309	10.2894	10.2924	10.4682	10.5784	10.3713	10.2136	9.51912	9.63151	9.32808	9.4131	9.50154	9.39084	10.0897	10.0947	10.4218	10.2376	10.5233	10.2925	770.061	0.166103
ENSMUSG00000007867	Ift43	4.81763	4.84793	4.82377	4.66909	4.84238	4.84154	4.67653	4.63343	4.57589	4.4849	4.63179	4.60074	4.32007	4.28728	4.32576	4.3202	4.24375	4.4025	5.36374	5.33266	5.37032	5.38861	5.42515	5.3683	5.41208	5.43611	5.43131	5.48479	5.37745	5.49554	5.44622	5.53986	5.55095	5.45809	4.82978	4.78434	4.62861	4.57248	4.30367	4.29657	5.35557	5.39402	5.4265	5.45259	5.49304	5.50452	26.3962	-0.224776
ENSMUSG00000007872	Id3	NA	NA	NA	NA	NA	NA	2.19798	2.09047	2.17131	2.07145	2.23888	2.23217	NA	NA	NA	NA	NA	NA	2.0029	2.01985	2.00112	2.05119	2.0191	2.04278	3.0686	3.11407	3.08874	3.16251	3.07499	3.13418	3.65287	3.66353	3.70405	3.71154	NA	NA	2.15325	2.18083	NA	NA	2.00796	2.03769	3.09047	3.12389	3.6582	3.7078	NA	NA
ENSMUSG00000007877	Tcap	3.7018	3.64924	3.65076	3.59277	3.69661	3.72947	3.37779	3.48235	3.45154	3.37939	3.42465	3.37777	3.3381	3.36868	3.4173	3.39547	3.34789	3.34203	3.925	3.81721	3.83923	3.92201	3.88424	3.85553	3.99755	4.05691	4.1119	4.12603	4.06302	4.03728	3.30726	3.29017	3.29228	3.34367	3.66727	3.67295	3.43723	3.39394	3.35339	3.38689	3.86048	3.88726	4.05545	4.07544	3.29872	3.31798	11.7686	0.0870661
ENSMUSG00000007880	Arid1a	9.3002	9.24756	9.20225	9.1332	9.37017	9.14072	9.06055	9.13389	9.13561	9.18915	9.0584	9.15459	8.87027	9.16105	9.02121	8.97334	9.13984	9.02155	9.84331	9.85127	9.79616	9.7631	9.84595	9.79503	9.95646	9.94066	9.99329	9.98575	9.89969	9.94578	9.89888	9.85657	9.78058	9.81275	9.25	9.2147	9.11002	9.13405	9.01566	9.04479	9.83025	9.80136	9.96347	9.94374	9.87773	9.79666	602.202	-0.0403618
ENSMUSG00000007888	Crlf1	NA	NA	NA	NA	NA	NA	NA	NA	NA	NA	NA	NA	NA	NA	NA	NA	NA	NA	NA	NA	NA	NA	NA	NA	2.4312	2.4176	2.49497	2.46757	2.45527	2.48213	2.43275	2.44286	2.44333	2.42564	NA	NA	NA	NA	NA	NA	NA	NA	2.44793	2.46832	2.43781	2.43448	NA	NA
ENSMUSG00000007891	Ctsd	8.01077	7.93715	7.82358	7.79325	7.85059	7.89226	7.62537	7.68093	7.60598	7.56245	7.76543	7.53002	7.65825	7.46427	7.62399	7.56157	7.56602	7.53052	8.38294	8.49668	8.45046	8.44942	8.52592	8.36417	8.50313	8.5412	8.67057	8.66384	8.64808	8.6736	8.53681	8.50766	8.87252	8.8194	7.92383	7.84537	7.63743	7.6193	7.56126	7.58386	8.44336	8.4465	8.57163	8.66184	8.52224	8.84596	235.707	-0.144456
ENSMUSG00000007892	Rplp1	4.79785	4.7228	4.75235	4.58001	4.7554	4.79454	4.89653	5.18984	5.04836	4.79245	4.88984	4.92982	4.91564	5.04325	4.99997	5.10619	4.98689	5.15931	5.53685	5.61637	5.63478	5.5992	5.57961	5.527	5.41081	5.47738	5.3267	5.33811	5.41257	5.38213	5.46495	5.50409	5.58549	5.52949	4.75767	4.70998	5.04491	4.8707	4.97945	5.03102	5.596	5.56861	5.40496	5.37761	5.48452	5.55749	24.8968	-0.257177
ENSMUSG00000007908	Hmgcll1	5.54127	5.62413	5.51139	5.75289	5.59862	5.67916	5.38251	5.2872	5.25959	5.32872	5.25369	5.43994	5.09785	5.09223	5.16561	5.01849	5.12728	5.15319	5.81538	5.80665	5.77993	5.78713	5.71148	5.85944	5.9691	5.90953	5.93344	5.96576	6.0891	6.12026	6.1238	6.1539	6.14167	6.13697	5.55893	5.67689	5.30976	5.34078	5.09504	5.10379	5.80065	5.78602	5.93736	6.05837	6.13885	6.13932	51.0281	0.41842
ENSMUSG00000007944	Ttc9b	8.01847	7.89369	7.85829	7.58795	7.70757	7.92351	7.86152	8.37951	8.13732	7.94585	8.1187	7.99944	8.01305	7.78847	7.9079	7.75749	7.8216	7.9551	8.67608	8.76915	8.78212	8.71522	8.65779	8.62211	8.54689	8.64187	8.57813	8.73597	8.68237	8.54109	8.59386	8.53285	8.6452	8.72016	7.92348	7.73968	8.12611	8.02133	7.90076	7.829	8.74245	8.66504	8.58896	8.65314	8.56336	8.68268	227.273	-0.317801
ENSMUSG00000007950	Abhd8	8.33826	8.26234	8.27553	8.16942	8.19545	8.09755	7.89781	8.58139	8.22786	7.98825	8.16048	8.29953	8.02665	8.02863	8.36152	8.13745	8.1418	8.34712	8.83552	8.96322	8.89391	8.9553	8.90313	8.78127	8.94368	8.9494	8.96981	9.15891	9.10443	8.8737	9.017	8.95318	9.07896	9.25894	8.29204	8.15414	8.23569	8.14942	8.02764	8.21359	8.89755	8.8799	8.9543	9.04568	8.98509	9.16895	299.213	-0.246983
ENSMUSG00000007987	Ift22	7.68499	7.75095	7.74547	7.99929	7.69164	7.7672	7.56931	7.33102	7.28068	7.53869	7.55129	7.37359	7.37203	7.48614	7.3825	7.51077	7.38299	7.39069	7.98584	8.07522	7.923	8.10398	8.05759	8.00439	8.33098	8.2058	8.38491	8.27917	8.17634	8.2244	8.31077	8.29191	8.18448	8.23289	7.72714	7.81937	7.39367	7.48786	7.42908	7.42542	7.99469	8.05532	8.30723	8.22664	8.30134	8.20869	223.182	0.162488
ENSMUSG00000007989	Fzd3	8.19813	8.31132	8.22518	8.05922	8.31512	8.28095	8.06513	7.97655	8.16178	8.09078	8.26557	8.08407	8.09828	8.09138	8.14241	8.09098	8.08916	8.02022	9.00029	8.98888	9.02503	8.90155	8.99696	8.96447	9.09981	8.95737	9.1555	9.12817	9.06187	9.03827	8.79862	8.89832	8.73872	8.66817	8.24488	8.21843	8.06782	8.14681	8.09483	8.10752	9.00474	8.95433	9.07089	9.0761	8.84847	8.70344	299.515	-0.0185869
ENSMUSG00000008035	Mid1ip1	5.5893	5.58567	5.47214	5.3491	5.49639	5.56666	5.52048	5.77055	5.60979	5.51181	5.7275	5.56268	5.48114	5.39626	5.34288	5.34981	5.47693	5.48163	6.10901	6.0667	6.08391	6.13802	6.05735	6.0531	6.50549	6.4286	6.55389	6.57653	6.49425	6.44878	6.52982	6.58713	6.50286	6.58784	5.54904	5.47072	5.63361	5.60066	5.4387	5.38987	6.08654	6.08283	6.496	6.50652	6.55848	6.54535	43.7467	-0.286664
ENSMUSG00000008036	Ap2s1	10.1931	10.2955	10.377	10.5441	10.2113	10.3431	10.0468	9.8342	9.96185	10.0605	10.069	10.0103	9.73715	10.0029	9.9407	9.92672	9.76755	9.82667	10.6446	10.5037	10.5118	10.5537	10.5372	10.5608	11.0091	10.8762	10.9942	10.7864	10.7631	10.8303	10.855	10.8581	10.741	10.7524	10.2885	10.3661	9.94761	10.0466	9.87004	9.87833	10.5534	10.5505	10.9598	10.7933	10.8566	10.7467	1295.79	0.113793
ENSMUSG00000008090	Fgfrl1	NA	NA	NA	NA	NA	NA	2.41426	2.47429	2.36871	2.32061	2.40708	2.41842	NA	NA	NA	NA	NA	NA	2.41058	2.43501	2.45447	2.39786	2.42253	2.41428	3.5453	3.55874	3.534	3.57328	3.63483	3.636	3.72057	3.67913	3.74826	3.77165	NA	NA	2.41909	2.38204	NA	NA	2.43335	2.41156	3.54601	3.61471	3.69985	3.75996	NA	NA
ENSMUSG00000008129	4930432K21Rik	4.46239	4.45772	4.42795	4.41387	4.34057	4.46309	4.39645	4.48179	4.19744	4.36858	4.41899	4.29872	4.37194	4.19359	4.29311	4.24099	4.26171	4.25106	5.40424	5.30461	5.25332	5.30433	5.2457	5.29913	5.13106	5.10497	5.14997	5.22418	5.10952	5.11918	4.85789	4.86928	4.88261	4.84123	4.44935	4.40584	4.35856	4.3621	4.28276	4.26527	5.32072	5.28305	5.12867	5.15096	4.86358	4.86192	21.4041	-0.294278
ENSMUSG00000008136	Fhl2	8.6043	8.37858	8.52526	8.35909	8.4667	8.48537	8.41984	8.61049	8.4686	8.40225	8.43729	8.25318	8.08407	8.25659	8.20233	8.19597	8.1461	8.1718	9.14044	9.00558	9.07273	9.05442	9.11739	9.01996	8.95538	9.10036	9.0525	9.01767	9.04482	9.00342	9.07592	9.09262	9.12784	9.21702	8.50271	8.43705	8.49964	8.36424	8.17033	8.18147	9.07292	9.06392	9.03608	9.02197	9.08427	9.17243	354.559	-0.104312
ENSMUSG00000008140	Emc10	8.78412	8.69602	8.63102	9.0141	8.75	8.62932	8.49431	8.89493	8.41379	8.54627	8.58966	8.31472	8.19645	8.19965	8.39617	8.26759	8.14379	8.49916	9.20386	9.0891	9.33246	9.05455	9.04845	9.02995	9.32295	9.28256	9.52665	9.43587	9.36506	9.3065	9.25404	9.29807	9.24838	9.21415	8.70372	8.79781	8.60101	8.48355	8.19805	8.26918	9.20847	9.04432	9.37739	9.36915	9.27605	9.23126	437.886	0.14942
ENSMUSG00000008153	Clstn3	12.037	11.8598	11.8297	11.9409	11.9365	11.8569	11.7744	12.0049	11.7394	11.7562	11.7662	11.7871	11.5239	11.6399	11.646	11.6341	11.6881	11.5575	12.4501	12.5	12.5251	12.5235	12.6635	12.3558	12.6726	12.6575	12.6263	12.7343	12.5824	12.5403	12.6186	12.6189	12.6463	12.6752	11.9088	11.9114	11.8395	11.7698	11.5819	11.6561	12.4917	12.5143	12.6522	12.619	12.6187	12.6608	3857.11	-0.0018199
ENSMUSG00000008167	Fbxw9	4.03999	3.95678	3.912	3.98289	3.96461	3.91193	3.84177	3.93036	4.01406	3.78649	3.86391	3.79626	3.66666	3.71446	3.71146	3.73308	3.73268	3.74056	4.42885	4.47449	4.44242	4.45846	4.47441	4.44124	4.1661	4.21164	4.19953	4.22506	4.28422	4.16765	4.5475	4.56085	4.58825	4.54249	3.96959	3.95314	3.92873	3.81555	3.69056	3.72574	4.44859	4.45804	4.19242	4.22565	4.55418	4.56537	15.854	-0.171932
ENSMUSG00000008200	Fnbp4	6.72481	6.63612	6.73179	6.80167	6.81564	6.85937	6.6544	6.65479	6.45422	6.74376	6.53491	6.33697	6.58699	6.61868	6.41881	6.53198	6.50158	6.55133	7.3957	7.22405	7.32243	7.30273	7.28877	7.31521	7.31448	7.2373	7.36755	7.28894	7.22026	7.24257	7.45735	7.44374	7.30144	7.46645	6.69757	6.82556	6.5878	6.53855	6.60283	6.48413	7.31406	7.30224	7.30644	7.25059	7.45055	7.38395	109.446	0.320477
ENSMUSG00000008206	Cers4	7.4702	7.40142	7.42301	7.22493	7.32421	7.38177	7.28393	7.35673	7.23054	7.28161	7.44246	7.08988	6.99468	7.05604	7.12125	7.09988	6.98544	7.12739	7.88307	7.86103	7.95346	7.8446	7.93076	7.802	8.16406	8.0709	8.28302	8.14504	8.1463	7.99298	7.90707	7.98103	7.90328	7.88896	7.43155	7.3103	7.2904	7.27132	7.02536	7.06886	7.89919	7.85912	8.17266	8.09477	7.94405	7.89612	164.354	-0.231949
ENSMUSG00000008226	Scrn3	7.18254	7.35188	7.35652	7.44941	7.34366	7.38944	7.19429	6.95468	7.07554	7.139	7.05445	6.92259	7.39096	7.47523	7.28104	7.31078	7.34189	7.13186	7.95594	7.9851	7.844	7.93564	7.97772	8.02157	8.23705	8.2343	7.94286	7.91955	8.0699	8.23455	8.08987	8.09867	7.93583	7.84412	7.29698	7.39417	7.07484	7.03868	7.4331	7.31124	7.92835	7.97831	8.13807	8.07467	8.09427	7.88998	164.694	0.19065
ENSMUSG00000008301	Phax	7.83851	7.76659	7.89579	7.65536	7.67974	7.86221	7.61565	7.52531	7.5961	7.69153	7.67034	7.36737	7.68739	7.56997	7.74103	7.63358	7.62279	7.65774	8.34795	8.30805	8.30715	8.39768	8.30985	8.42745	8.44736	8.33689	8.40934	8.39125	8.36506	8.30237	8.4937	8.55826	8.40031	8.485	7.83363	7.73243	7.57902	7.57642	7.62868	7.6658	8.32105	8.37832	8.39786	8.35289	8.52598	8.44266	219.861	-0.17186
ENSMUSG00000008305	Tle1	6.95511	7.0363	6.90425	6.98677	6.92319	7.00173	6.85399	6.91124	6.80871	6.90491	6.95501	6.90286	6.94219	6.91848	7.00013	6.91198	7.01301	6.87972	7.72571	7.74624	7.6708	7.54309	7.69788	7.68631	7.63515	7.68895	7.71295	7.71695	7.76001	7.73514	7.67961	7.50035	7.55803	7.59288	6.96522	6.97057	6.85798	6.92093	6.93034	6.97504	7.71425	7.64243	7.67902	7.73737	7.58998	7.57546	125.45	0.00298995
ENSMUSG00000008318	Relt	5.16671	5.18536	5.27024	5.02132	5.1322	5.15503	5.387	5.55188	5.41311	5.4621	5.43753	5.24245	5.27694	5.17595	5.17897	5.22027	5.17882	5.1954	6.16808	6.15036	6.18598	6.0448	6.00724	5.98107	6.12784	5.99344	6.20441	6.18873	6.1492	6.10437	6.28517	6.33812	6.31392	6.36586	5.20744	5.10285	5.45066	5.38069	5.22645	5.19269	6.16814	6.01104	6.10856	6.14744	6.31164	6.33989	34.3942	-0.470941
ENSMUSG00000008333	Snrpb2	7.17199	7.25926	7.38396	7.17128	7.37024	7.37163	7.36059	6.9194	7.01518	7.32724	7.24585	7.27277	7.55635	7.41994	7.20694	7.47826	7.32312	7.29369	7.92761	8.01502	7.83038	7.97983	7.80174	8.06272	8.11875	8.12226	8.08674	7.9711	7.94982	8.22846	7.86525	7.94755	7.84415	7.72659	7.27174	7.30438	7.09839	7.28195	7.48814	7.33611	7.92434	7.9481	8.10925	8.04979	7.9064	7.78537	155.825	0.095197
ENSMUSG00000008348	Ubc	9.4706	9.46412	9.42041	9.25991	9.40802	9.44832	9.41442	9.33391	9.24009	9.30586	9.2167	9.22501	9.38109	9.41468	9.39954	9.37332	9.40936	9.15288	10.2141	10.1772	10.0114	10.1503	10.1949	10.2478	10.3315	10.5462	10.1206	10.3557	10.2738	10.3289	10.5552	10.4704	10.6412	10.4639	9.45171	9.37208	9.32947	9.24919	9.39788	9.39407	10.1343	10.1977	10.3328	10.3195	10.5128	10.5526	680.775	-0.106762
ENSMUSG00000008373	Prpf31	7.03498	6.88843	7.03192	6.87563	6.94291	7.07797	6.7298	6.68538	6.63866	6.75873	6.86005	6.36756	6.70559	6.78715	6.7072	6.86829	6.72834	6.84267	7.43483	7.37705	7.51306	7.41617	7.49206	7.51293	7.52705	7.68372	7.53099	7.44365	7.46602	7.50411	7.33015	7.37952	7.47013	7.43834	6.98511	6.9655	6.68461	6.66211	6.74637	6.76794	7.44165	7.47372	7.58059	7.47126	7.35484	7.45423	125.2	-0.0225394
ENSMUSG00000008384	Sertad1	5.06309	5.06795	5.03092	4.92684	5.0346	5.16013	5.22206	5.4706	5.37564	5.14359	5.27065	5.57575	5.04693	4.96463	5.21608	5.03553	5.06819	5.14631	5.27759	5.30011	5.40029	5.23842	5.30905	5.30128	5.73579	5.75963	5.91467	5.807	5.86899	5.76618	5.80296	5.84513	5.74019	5.81007	5.05399	5.04052	5.3561	5.33	5.00578	5.1066	5.326	5.28292	5.80336	5.81406	5.82404	5.77513	31.6782	-0.0279762
ENSMUSG00000008398	Elk3	2.3447	2.36845	2.38582	2.33211	2.37192	2.38363	2.12097	2.19319	2.14522	2.13351	2.15374	2.09298	2.67963	2.67941	2.63871	2.67165	2.70809	2.71292	2.77756	2.73802	2.7688	2.7435	2.77509	2.75114	2.80323	2.88408	2.8234	2.83099	2.79299	2.77928	3.05249	3.0214	3.03219	3.04445	2.36632	2.36255	2.15313	2.12674	2.67952	2.67282	2.76146	2.75658	2.8369	2.80109	3.03695	3.03832	4.78172	-0.0630222
ENSMUSG00000008429	Herpud2	7.85794	7.95528	7.93533	7.68313	7.85815	8.052	7.74029	7.58223	7.66814	7.82932	7.8228	7.86661	7.83565	7.78217	7.8556	7.74984	7.87888	7.7006	8.62392	8.49157	8.57808	8.59327	8.49499	8.45152	8.62173	8.56393	8.55402	8.591	8.65871	8.59805	8.48109	8.49909	8.40571	8.40136	7.91618	7.86443	7.66355	7.83958	7.80891	7.82811	8.56452	8.51326	8.57989	8.61592	8.49009	8.40353	236.318	-0.0576079
ENSMUSG00000008435	Rdh13	4.8866	4.78347	4.75346	4.69421	4.83264	4.76532	4.37981	4.58351	4.38713	4.36385	4.3962	4.3024	4.57491	4.57728	4.74793	4.6599	4.61183	4.70963	5.35247	5.32846	5.37833	5.37844	5.28831	5.34913	5.33262	5.37255	5.47222	5.36872	5.46498	5.46698	5.38561	5.45801	5.48172	5.45644	4.80784	4.76406	4.45015	4.35415	4.57609	4.67322	5.35309	5.33863	5.39246	5.43356	5.42181	5.46908	26.515	-0.234962
ENSMUSG00000008475	Arpc5	7.36273	7.43735	7.52705	7.48335	7.41521	7.40652	7.40935	7.45377	7.49747	7.41376	7.4772	7.81343	7.41349	7.30095	7.36602	7.52104	7.38018	7.31585	7.94497	7.81266	7.92399	7.95689	7.79241	7.86917	8.04341	8.25959	8.13812	8.17957	8.18342	8.10936	8.09962	8.25652	8.29228	8.19203	7.44238	7.43503	7.45353	7.56813	7.35722	7.42241	7.89388	7.87282	8.14704	8.15745	8.17807	8.24216	174.578	-0.0245144
ENSMUSG00000008489	Elavl2	8.82258	8.85161	8.82406	8.78336	8.79648	8.8821	8.78047	8.44666	8.70579	8.81368	8.73972	8.64844	8.7693	8.78939	8.73511	8.79772	8.81884	8.62713	9.51397	9.48288	9.47046	9.4671	9.40314	9.50081	9.50983	9.51291	9.51479	9.43753	9.51355	9.53196	9.49675	9.53901	9.4196	9.18842	8.83275	8.82065	8.64431	8.73395	8.77935	8.78389	9.4891	9.45702	9.51251	9.49435	9.51788	9.30401	453.701	-0.0127622
ENSMUSG00000008496	Pou2f2	NA	NA	NA	NA	NA	NA	NA	NA	NA	NA	NA	NA	NA	NA	NA	NA	NA	NA	2.09771	2.04947	2.04512	2.04394	2.06373	2.06862	1.97644	1.98204	1.99283	1.95103	2.00024	1.97673	NA	NA	NA	NA	NA	NA	NA	NA	NA	NA	2.0641	2.05876	1.98377	1.976	NA	NA	NA	NA
ENSMUSG00000008540	Mgst1	2.22941	2.27502	2.25213	2.40926	2.24189	2.30386	1.98586	1.89081	2.03887	1.92424	1.98152	2.05119	NA	NA	NA	NA	NA	NA	2.23786	2.20579	2.23247	2.21774	2.22092	2.26053	3.00535	3.04269	3.00831	3.04977	2.99492	3.03419	2.78965	2.79315	2.80491	2.82252	2.25219	2.31834	1.97185	1.98565	NA	NA	2.22537	2.23306	3.01879	3.02629	2.7914	2.81372	6.54596	1.58977
ENSMUSG00000008575	Nfib	8.28279	8.31977	8.34175	8.02588	8.2371	8.37578	8.20111	8.00575	8.06291	8.14492	8.13552	8.11359	8.14929	8.13173	8.27712	8.24906	8.21743	8.23572	9.00127	9.00114	8.96939	8.95956	8.95788	9.05118	8.97849	8.97266	9.00167	8.971	8.98366	9.11183	9.08192	9.11195	9.01868	9.03656	8.31477	8.21292	8.08992	8.13134	8.14051	8.24787	8.9906	8.98954	8.98427	9.02216	9.09693	9.02762	306.479	-0.140854
ENSMUSG00000008604	Ubqln4	8.34046	8.30146	8.40163	8.42227	8.34091	8.20373	8.15622	8.33725	8.24148	8.24253	8.13238	8.19266	7.98764	8.03678	8.02154	8.06748	8.11591	7.96359	8.94336	8.79308	8.92447	8.77908	8.89613	8.65687	9.0332	9.06195	9.04525	9.09925	9.05662	8.93155	8.98901	9.00456	9.00424	8.99391	8.34785	8.3223	8.24498	8.18919	8.01221	8.06831	8.88697	8.77736	9.0468	9.02914	8.99678	8.99908	325.108	-0.0538509
ENSMUSG00000008658	Rbfox1	10.3676	10.3344	10.2711	10.342	10.3329	10.3386	10.1867	10.2495	10.197	10.1962	10.3012	10.2925	10.0667	10.1507	10.1237	10.1771	10.1083	10.103	10.9977	10.8921	10.9421	10.9687	10.9422	10.8622	11.0322	10.9774	11.0724	10.9653	11.0215	10.997	10.9044	10.9758	10.8174	10.8812	10.3244	10.3378	10.2111	10.2633	10.1087	10.1364	10.944	10.9243	11.0273	10.9946	10.9401	10.8493	1288.64	0.0173602
ENSMUSG00000008668	Rps18	3.73996	3.69157	3.64543	3.6234	3.62988	3.73735	3.83861	3.94575	3.90779	3.92428	3.9147	4.01017	3.88547	3.80815	3.9743	3.87466	3.82471	3.87441	4.3656	4.38901	4.41369	4.32112	4.35614	4.40737	4.34174	4.28451	4.33995	4.36271	4.4063	4.34634	4.65386	4.65709	4.66479	4.6848	3.69232	3.66354	3.89738	3.94971	3.84681	3.89122	4.38944	4.36154	4.32207	4.37179	4.65547	4.6748	12.1058	-0.290791
ENSMUSG00000008682	Rpl10	NA	NA	NA	NA	NA	NA	NA	NA	NA	NA	NA	NA	NA	NA	NA	NA	NA	NA	1.64076	1.61632	1.63741	1.61939	1.60386	1.60724	NA	NA	NA	NA	NA	NA	NA	NA	NA	NA	NA	NA	NA	NA	NA	NA	1.63149	1.61017	NA	NA	NA	NA	NA	NA
ENSMUSG00000008683	Rps15a	5.6639	5.82062	5.68276	5.68505	5.77503	5.68289	5.70161	5.53757	5.72224	5.71421	5.64745	5.88583	6.38868	6.19874	6.1129	6.16843	6.31992	6.12502	6.53597	6.55079	6.48217	6.43911	6.46109	6.60112	6.67954	6.75814	6.63621	6.49743	6.53481	6.71405	6.50178	6.68043	6.61949	6.64652	5.72243	5.71433	5.65381	5.74916	6.29371	6.20042	6.52298	6.50044	6.6913	6.5821	6.5911	6.633	52.3114	-0.0308722
ENSMUSG00000008690	Ncaph2	7.48574	7.40303	7.4844	7.09836	7.42269	7.35098	7.28139	7.5622	7.405	7.3036	7.28474	7.38782	7.51473	7.41666	7.42163	7.40722	7.50581	7.50954	8.0478	8.10905	7.97802	8.12891	8.17532	8.05533	8.15586	8.30508	8.1195	8.2354	8.18049	8.23724	8.15954	8.11338	8.28063	8.28034	7.45772	7.29068	7.4162	7.32538	7.46569	7.44489	8.04495	8.11985	8.19348	8.21771	8.13646	8.28048	164.284	-0.306875
ENSMUSG00000008730	Hipk1	8.35785	8.31917	8.31744	8.22203	8.40022	8.21772	7.99328	8.03393	8.17963	8.04269	8.01183	8.22142	8.14776	8.26338	8.20721	8.26034	8.2117	8.21367	8.75136	8.95846	8.80205	8.98158	9.03735	8.88875	9.04619	8.9844	8.87142	8.99748	9.05667	9.04405	8.98405	8.94732	8.99805	9.01696	8.33149	8.27999	8.06895	8.09198	8.20557	8.22641	8.83729	8.96923	8.96734	9.03273	8.96568	9.00751	316.121	-0.075468
ENSMUSG00000008734	Gprc5b	5.91627	5.84368	5.9424	5.81516	5.73997	5.86985	5.97662	5.95336	6.06512	5.85193	6.03091	6.11939	5.44139	5.49352	5.51008	5.53909	5.41813	5.62523	6.61313	6.54648	6.53459	6.49367	6.5906	6.68398	6.73698	6.7917	6.90221	6.92821	6.98562	6.88574	6.95057	6.95148	6.92051	6.92141	5.90079	5.80833	5.99837	6.00074	5.46745	5.4891	6.56473	6.58942	6.8103	6.93319	6.95102	6.92096	57.7956	-0.311893
ENSMUSG00000008763	Man1a2	8.0122	8.11101	8.26039	8.13068	8.1532	8.12959	7.99288	7.76304	7.8889	8.05859	7.84493	8.05412	8.10471	8.09762	7.92679	8.01476	8.03429	7.82622	8.69513	8.80532	8.74537	8.78313	8.84031	8.73775	8.9057	8.82598	8.71773	8.73848	8.77817	8.75923	8.69819	8.74703	8.61236	8.64544	8.12786	8.13782	7.88161	7.98588	8.10116	7.99194	8.74861	8.78706	8.81647	8.75863	8.72261	8.6289	281.76	0.0153481
ENSMUSG00000008822	Acyp1	7.74254	7.92518	8.01636	8.12074	7.96033	8.01156	7.74937	7.05338	7.5705	7.79304	7.59981	7.5513	7.45031	7.73723	7.46537	7.56581	7.54981	7.40632	8.10737	7.90897	8.0725	7.96547	7.99104	8.07065	8.70911	8.63903	8.69296	8.31497	8.36285	8.69981	8.17888	8.23402	8.03871	7.97519	7.8947	8.03087	7.45775	7.64805	7.59377	7.52699	8.02961	8.00905	8.68037	8.45921	8.20645	8.00695	253.516	0.235419
ENSMUSG00000008855	Hdac5	7.08258	6.91673	6.91058	6.71107	7.00061	6.62439	6.55527	6.49694	6.77664	6.58393	6.53255	6.94095	6.70875	6.84704	6.72115	6.73934	6.78873	6.86238	7.09084	7.13782	7.18129	7.28874	7.45606	7.22207	7.2858	7.45754	7.28215	7.37887	7.38722	7.34615	7.66138	7.68701	7.92672	7.79186	6.96996	6.77869	6.60962	6.68581	6.7779	6.74974	7.13665	7.32229	7.34183	7.37075	7.67419	7.85929	117.444	-0.42594
ENSMUSG00000008859	Rala	7.37094	7.43879	7.52534	7.20851	7.49313	7.42425	7.42662	7.14496	7.19721	7.39408	7.18833	7.2153	7.44061	7.44203	7.336	7.44849	7.29126	7.33537	8.17025	8.16409	8.05444	8.1056	8.09694	8.19953	8.32444	8.2953	8.09183	8.15041	8.22891	8.21591	8.07342	8.1455	8.08886	8.0393	7.44503	7.3753	7.25626	7.2659	7.44132	7.35858	8.12959	8.13402	8.23719	8.19841	8.10946	8.06408	168.793	-0.108316
ENSMUSG00000008892	Vdac3	7.63486	7.71095	7.90325	7.62958	7.68552	7.63731	7.65535	7.2844	7.53485	7.69921	7.34536	7.52675	7.2607	7.51397	7.31224	7.49066	7.35029	7.39051	8.23519	8.14467	8.119	8.23423	8.12053	8.24023	8.47977	8.40223	8.31981	8.37608	8.28564	8.4277	8.19617	8.27695	8.07751	8.09019	7.74969	7.6508	7.49153	7.52377	7.38734	7.3844	8.16628	8.19833	8.4006	8.36314	8.23656	8.08385	208.652	-0.193635
ENSMUSG00000008958	Vps72	6.03441	5.97858	5.99942	6.28148	5.92824	5.95355	5.62737	5.61862	5.77435	5.75887	5.65689	5.48446	5.62893	5.66092	5.59566	5.70745	5.69659	5.76489	6.26904	6.29557	6.30781	6.39523	6.30799	6.32684	6.39168	6.30487	6.34063	6.30792	6.2682	6.24384	6.53996	6.59904	6.50486	6.57488	6.00414	6.05442	5.67345	5.63341	5.64493	5.66657	6.29081	6.34336	6.34572	6.27332	6.5695	6.53987	69.5107	0.163098
ENSMUSG00000008976	Gabpa	5.99073	6.02131	5.98237	5.83948	6.1225	5.92322	5.86722	5.69787	5.99938	5.80626	5.81846	5.74181	5.73154	5.72437	5.57898	5.66984	5.73378	5.61153	6.55898	6.48719	6.37891	6.53483	6.47427	6.4943	6.67326	6.73061	6.76096	6.56939	6.80968	6.64874	6.75369	6.81985	6.79274	6.69074	5.99813	5.96173	5.85482	5.78884	5.72796	5.66087	6.47503	6.50113	6.72161	6.67594	6.78677	6.74174	61.7682	-0.0775706
ENSMUSG00000008999	Bmp7	2.66961	2.69709	2.68196	2.83923	2.65968	2.6761	2.53447	2.45427	2.4911	2.61381	2.54788	2.543	2.28599	2.28926	2.30579	2.27804	2.27825	2.31497	2.98862	2.98925	2.99778	2.9895	2.97993	2.96843	3.38729	3.40901	3.41194	3.39862	3.45452	3.40165	3.05053	3.04131	3.02484	3.02519	2.68289	2.725	2.49328	2.56823	2.28762	2.28736	2.99188	2.97929	3.40275	3.41826	3.04592	3.02501	8.37706	0.810839
ENSMUSG00000009013	Dynll1	10.5274	10.5359	10.5216	10.5282	10.3928	10.6317	10.3704	10.1189	10.4211	10.364	10.475	10.3157	10.4962	10.2985	10.3112	10.384	10.271	10.1784	11.1607	11.1875	11.2744	11.1787	11.0915	11.0944	11.2485	11.2012	11.1414	11.2793	11.307	11.1367	11.3057	11.3387	11.2693	11.3461	10.5283	10.5175	10.3035	10.3849	10.3973	10.3221	11.2075	11.1215	11.197	11.241	11.3222	11.3077	1474.52	-0.00986073
ENSMUSG00000009030	Pdcl	6.56718	6.58968	6.69857	6.6804	6.58091	6.67771	6.58421	6.32632	6.49275	6.54746	6.35588	6.59794	6.71266	6.70524	6.66373	6.68968	6.60078	6.69431	7.22959	7.34333	7.20319	7.17163	7.22594	7.22115	7.53838	7.48772	7.34735	7.40264	7.42135	7.39126	7.45328	7.46661	7.44031	7.37907	6.61848	6.64634	6.46776	6.50043	6.70895	6.6514	7.2587	7.20624	7.45782	7.40508	7.45995	7.40969	100.213	0.0673352
ENSMUSG00000009035	Tmem184b	7.46556	7.31487	7.30356	7.56714	7.30094	7.27783	6.98871	7.51138	7.17621	7.05227	7.31382	7.13294	7.15971	7.02646	7.19525	6.98176	6.99268	7.16077	7.92233	7.91042	8.03125	7.90529	7.96417	7.86088	7.84317	7.78864	7.89362	8.01118	7.95928	7.83564	7.79588	7.76851	7.91523	7.88419	7.36133	7.38197	7.22543	7.16634	7.09308	7.05657	7.95466	7.91011	7.84181	7.93537	7.78219	7.89971	169.323	0.0229721
ENSMUSG00000009073	Nf2	5.67507	5.69496	5.75583	5.66877	5.6211	5.63511	5.87218	5.87295	5.83514	5.76414	5.85604	5.85304	6.01317	5.85218	5.90243	5.86697	5.93269	5.90429	6.66562	6.578	6.66082	6.69258	6.64971	6.65716	6.57206	6.6588	6.59318	6.65277	6.60115	6.72757	6.68546	6.61954	6.7798	6.65366	5.70862	5.64166	5.86009	5.82441	5.93267	5.9007	6.63482	6.66648	6.60801	6.6605	6.6525	6.71673	51.2885	-0.254203
ENSMUSG00000009075	Cabp7	4.27084	4.20654	4.23452	4.33584	4.2	4.21928	3.89447	3.95501	3.80699	3.88934	3.80446	3.86156	4.39401	4.36822	4.38846	4.46614	4.35663	4.41667	5.13978	5.10763	5.14382	5.16813	5.15068	5.10359	5.31994	5.54391	5.29611	5.3229	5.38577	5.36686	5.06002	5.08007	5.07014	5.15683	4.2373	4.25171	3.88549	3.85178	4.38112	4.40374	5.13041	5.1408	5.38665	5.35851	5.07004	5.11348	20.2475	0.0864493
ENSMUSG00000009076	Zmat5	5.62096	5.59575	5.66321	5.57384	5.64513	5.54585	5.3827	5.26415	5.6035	5.42214	5.31122	5.56627	5.24941	5.22745	5.16602	5.29942	5.19901	5.23342	6.06984	5.99093	6.07278	6.04596	6.09925	6.01422	6.12129	6.30738	6.29499	6.14064	6.20641	6.2194	6.30075	6.39149	6.45681	6.37606	5.62664	5.58827	5.41678	5.43321	5.23843	5.22148	6.04451	6.05314	6.24122	6.18882	6.34612	6.41644	48.5397	-0.135994
ENSMUSG00000009079	Ewsr1	8.15972	7.97902	7.70046	7.80708	7.93884	7.86868	7.7539	7.95426	7.84367	7.81749	7.85788	7.72053	7.75949	7.70836	7.64701	7.74526	7.67898	7.56	8.74382	8.56907	8.56173	8.60049	8.70461	8.46515	8.46315	8.48496	8.47407	8.55733	8.48757	8.35304	8.52665	8.51684	8.66568	8.69671	7.9464	7.87153	7.85061	7.79863	7.73393	7.69042	8.62487	8.59008	8.47406	8.46598	8.52175	8.6812	241.464	-0.163679
ENSMUSG00000009090	Ap1b1	10.3445	10.25	10.2226	10.4242	10.1877	10.2742	10.1363	10.1854	10.0256	10.064	10.0273	9.90549	9.9082	9.95631	9.95541	9.95056	9.9113	10.0357	10.7178	10.6694	10.7389	10.7508	10.7281	10.6272	10.778	10.9117	10.8007	10.7807	10.7686	10.7975	10.825	10.8237	10.9676	10.9868	10.2724	10.2954	10.1158	9.99895	9.93226	9.93909	10.7087	10.702	10.8301	10.7822	10.8244	10.9772	1251.93	0.0286633
ENSMUSG00000009112	Bcl2l13	6.64038	6.53987	6.47484	6.4323	6.61351	6.50494	6.47283	6.65972	6.61193	6.50616	6.65038	6.85206	6.592	6.48062	6.46441	6.49891	6.53516	6.60354	7.23351	7.20188	7.20247	7.25018	7.19039	7.19808	7.27431	7.20541	7.31138	7.22492	7.32896	7.29122	7.26766	7.38782	7.37281	7.34314	6.5517	6.51692	6.58149	6.66954	6.53631	6.49949	7.21262	7.21288	7.2637	7.2817	7.32774	7.35798	91.6513	-0.0770015
ENSMUSG00000009207	Lnpk	9.13514	9.22596	9.33052	9.30689	9.34616	9.36808	9.25524	8.83825	9.13988	9.25558	9.15396	9.32579	9.13021	9.09509	9.08577	9.01479	9.02125	8.81591	9.60093	9.58775	9.66947	9.56113	9.61806	9.73061	10.1026	10.0684	9.96705	9.83596	9.85853	10.0985	9.80851	9.89276	9.63749	9.41512	9.23054	9.34038	9.07779	9.24511	9.11265	9.0406	9.61938	9.6366	10.046	9.93099	9.85063	9.5263	626.316	0.17361
ENSMUSG00000009216	Fam163b	6.77758	6.73342	6.61448	6.56353	6.61093	6.70571	6.64709	7.23092	6.89951	6.60218	7.02627	6.9356	6.95314	6.83208	6.92986	6.83052	6.88782	7.25615	7.66601	7.76121	7.67816	7.65556	7.58497	7.60526	7.46381	7.39877	7.5192	7.64662	7.68295	7.47047	7.54941	7.56082	7.55983	7.52052	6.70849	6.62672	6.92584	6.85468	6.89261	6.88273	7.70179	7.61527	7.46059	7.60002	7.55512	7.54017	100.618	-0.198508
ENSMUSG00000009281	Rarres2	NA	NA	NA	NA	NA	NA	2.1619	2.13293	2.15321	2.11388	2.15093	2.17526	NA	NA	NA	NA	NA	NA	NA	NA	NA	NA	NA	NA	2.29327	2.30877	2.31976	2.32076	2.30033	2.29456	3.03663	3.04549	3.08399	3.1146	NA	NA	2.14935	2.14669	NA	NA	NA	NA	2.30727	2.30522	3.04106	3.09929	NA	NA
ENSMUSG00000009291	Pttg1ip	3.25554	3.2122	3.22215	3.17269	3.19062	3.18379	3.77626	3.73814	3.63466	3.71834	3.68467	3.7195	3.29113	3.32903	3.32377	3.29728	3.32267	3.34996	4.47747	4.50824	4.45378	4.51859	4.42465	4.41478	4.39499	4.31452	4.38718	4.41617	4.41039	4.42048	4.94852	4.9278	4.9286	4.93647	3.22996	3.18237	3.71635	3.7075	3.31008	3.31457	4.47983	4.45267	4.36556	4.41568	4.93816	4.93254	8.85628	-0.690316
ENSMUSG00000009292	Trpm2	5.93563	5.91707	5.96295	5.8756	5.91065	5.83482	5.59987	5.79506	5.69062	5.57531	5.52233	5.7376	5.69588	5.79501	5.69324	5.65586	5.70369	5.74927	6.49896	6.53506	6.50142	6.62828	6.63457	6.43898	6.53297	6.53926	6.43719	6.55485	6.46297	6.48463	6.71709	6.61281	6.73568	6.72203	5.93855	5.87369	5.69518	5.61175	5.74544	5.68426	6.51181	6.56728	6.50314	6.50082	6.66495	6.72885	59.7979	-0.214808
ENSMUSG00000009293	Ube2g2	5.55392	5.48089	5.50616	5.56839	5.55441	5.52022	5.31185	5.41616	5.27308	5.33299	5.40398	5.44475	5.3729	5.51102	5.48569	5.40215	5.51677	5.60826	6.10879	6.04961	5.9594	6.04369	6.11882	6.09569	6.179	6.36779	6.22661	6.1339	6.22052	6.19862	6.29063	6.37358	6.40237	6.31143	5.51366	5.54768	5.3337	5.39391	5.44196	5.4682	6.03926	6.08607	6.2578	6.18435	6.3321	6.3569	46.7492	0.124721
ENSMUSG00000009376	Met	5.64742	5.61001	5.60124	5.58441	5.63072	5.64696	5.51214	5.53962	5.5457	5.50768	5.50135	5.42414	5.29463	5.25777	5.22233	5.30559	5.2651	5.26527	5.85018	5.98511	5.94721	5.91865	5.97346	5.80878	5.75557	5.76866	5.81179	5.77358	5.86478	5.84544	5.81542	5.91791	5.84528	5.89158	5.61956	5.6207	5.53248	5.47772	5.2762	5.26434	5.9275	5.9003	5.77868	5.82793	5.86666	5.86843	48.7106	0.0150845
ENSMUSG00000009394	Syn2	11.4341	11.4792	11.4492	11.7804	11.3886	11.4245	11.2847	11.186	11.2604	11.3263	11.163	11.248	11.1169	11.1783	11.1561	11.1862	11.1412	11.1284	11.8307	11.7454	11.8669	11.8384	11.8276	11.8536	12.0406	12.1058	12.0514	11.9403	11.9112	12.0575	11.9873	11.9818	11.9906	11.9754	11.4542	11.5312	11.2437	11.2458	11.1476	11.1612	11.8143	11.8399	12.0659	11.9696	11.9845	11.983	2908.12	0.122643
ENSMUSG00000009406	Elk1	5.61604	5.62055	5.39116	5.30238	5.45592	5.49497	5.20995	5.48211	5.32078	5.37102	5.31987	5.31973	5.48019	5.4954	5.47403	5.49249	5.52788	5.57279	6.41165	6.60681	6.37422	6.4993	6.51925	6.51096	6.24526	6.40966	6.31985	6.42499	6.43262	6.32375	6.69067	6.6717	6.75059	6.74108	5.54259	5.41776	5.33761	5.33688	5.48779	5.49813	6.46423	6.50984	6.32492	6.39379	6.68118	6.74584	42.8212	-0.509099
ENSMUSG00000009418	Nav1	8.43152	8.39457	8.19604	8.52136	8.26896	8.29527	8.23806	8.34567	8.21035	8.22026	8.11138	8.33107	8.043	8.18025	8.16113	8.04921	8.40451	8.19601	8.68848	8.85859	8.72626	8.81203	8.79022	8.79176	8.85272	8.89202	8.87893	8.84184	8.90145	8.94686	9.04769	8.85262	8.95859	8.95486	8.34071	8.36186	8.26469	8.22091	8.11162	8.20495	8.75778	8.79801	8.87456	8.89672	8.95016	8.95673	330.549	0.0155539
ENSMUSG00000009470	Tnpo1	5.85733	5.96092	6.00729	5.71803	5.91976	5.95853	6.11388	5.98029	6.0142	6.04526	5.91869	6.19104	5.85905	5.93467	5.95013	5.84672	5.82032	5.69211	6.68223	6.80236	6.65962	6.66732	6.64945	6.79517	6.92977	6.97329	6.87515	6.79143	6.83704	6.91552	6.69899	6.73336	6.68802	6.69365	5.94184	5.86544	6.03612	6.05166	5.89686	5.87239	6.71473	6.70398	6.92607	6.848	6.71617	6.69084	58.171	-0.224201
ENSMUSG00000009535	Rnmt	8.65749	8.7945	8.92925	8.81923	8.85729	8.84494	8.75107	8.11094	8.48353	8.59461	8.52303	8.62442	8.7486	8.65416	8.55833	8.57885	8.55564	8.56226	9.20013	9.27017	9.20724	9.14393	9.07769	9.29293	9.45036	9.3566	9.36509	9.07833	9.28551	9.45631	9.31287	9.32044	9.20468	9.16165	8.79375	8.84048	8.44851	8.58069	8.70138	8.56427	9.22585	9.17152	9.39068	9.27338	9.31666	9.18316	452.817	0.0735984
ENSMUSG00000009549	Srp14	7.68563	7.69382	7.7511	7.59306	7.63294	7.59371	7.48942	7.66667	7.42995	7.49543	7.61003	7.22602	7.77367	7.45365	7.49148	7.53242	7.46147	7.48448	8.323	8.34425	8.35591	8.3055	8.28444	8.25275	8.39494	8.36287	8.36004	8.56057	8.50808	8.29385	8.55431	8.46299	8.59407	8.64716	7.71018	7.60657	7.52868	7.44382	7.61366	7.49512	8.34105	8.2809	8.37262	8.45417	8.50865	8.62062	201.753	-0.198326
ENSMUSG00000009555	Cdk9	6.89941	6.8246	6.83493	6.67867	6.9171	6.81276	6.69304	6.91097	6.70357	6.64727	6.77236	6.44716	6.92701	6.69914	6.7786	6.75792	6.78016	6.91527	7.45696	7.45571	7.50379	7.481	7.43193	7.44456	7.43527	7.42652	7.36193	7.55864	7.4515	7.38125	7.52706	7.62454	7.62139	7.73199	6.85298	6.80284	6.7692	6.62226	6.81308	6.77223	7.47215	7.4525	7.40791	7.4638	7.5758	7.67669	112.172	-0.0890205
ENSMUSG00000009563	Tor2a	4.74798	4.72897	4.6714	4.7714	4.65519	4.63818	4.2119	4.40538	4.13941	4.32504	4.33586	4.335	4.38139	4.3409	4.38561	4.30234	4.36646	4.34754	5.04998	5.08741	5.23644	5.14038	5.12533	5.03381	5.47078	5.5621	5.61156	5.54984	5.4796	5.45679	5.45901	5.48364	5.4811	5.53533	4.71612	4.68826	4.25223	4.33197	4.36114	4.35147	5.12461	5.09984	5.54815	5.49541	5.47132	5.50821	26.9902	-0.192352
ENSMUSG00000009566	Fpgs	2.64671	2.62319	2.57934	2.68407	2.62886	2.58468	2.4583	2.41218	2.47272	2.47314	2.4998	2.48127	2.7687	2.8079	2.81809	2.82241	2.81482	2.7973	3.46599	3.42773	3.49522	3.4285	3.43076	3.46193	3.3291	3.28909	3.34615	3.35682	3.35723	3.30717	3.68107	3.65081	3.72054	3.74932	2.61641	2.63254	2.44773	2.48474	2.7883	2.81844	3.46298	3.4404	3.32144	3.34041	3.66594	3.73493	6.90937	0.300211
ENSMUSG00000009569	Mrtfb	10.7825	10.7492	10.7091	10.7524	10.7852	10.6995	10.4719	10.5707	10.6013	10.4822	10.4611	10.5589	10.5952	10.6329	10.6725	10.5368	10.6974	10.6216	11.4067	11.4667	11.2243	11.4054	11.4356	11.4071	11.4468	11.4949	11.435	11.4512	11.5264	11.5214	11.5228	11.4545	11.493	11.5221	10.7469	10.7457	10.548	10.5007	10.614	10.6356	11.3659	11.4161	11.4589	11.4996	11.4886	11.5075	1718.57	-0.00249328
ENSMUSG00000009575	Cbx5	8.68962	8.61936	8.83624	8.46864	8.5908	8.93093	8.71638	8.34665	8.72126	8.62745	8.55803	8.52006	8.97586	8.70749	8.78946	8.79884	8.68612	8.70898	9.33593	9.47776	9.42672	9.48999	9.23897	9.47892	9.42423	9.47495	9.28912	9.24283	9.43133	9.40081	9.43364	9.51847	9.36926	9.34122	8.71507	8.66346	8.59476	8.56852	8.84167	8.75814	9.41347	9.40263	9.3961	9.35832	9.47605	9.35524	415.257	-0.0488457
ENSMUSG00000009585	Apobec3	NA	NA	NA	NA	NA	NA	NA	NA	NA	NA	NA	NA	NA	NA	NA	NA	NA	NA	NA	NA	NA	NA	NA	NA	NA	NA	NA	NA	NA	NA	2.35859	2.34929	2.39714	2.40914	NA	NA	NA	NA	NA	NA	NA	NA	NA	NA	2.35394	2.40314	NA	NA
ENSMUSG00000009614	Sardh	NA	NA	NA	NA	NA	NA	1.78132	1.73063	1.826	1.83402	1.73687	1.78217	NA	NA	NA	NA	NA	NA	2.1724	2.18901	2.16939	2.15093	2.18377	2.15729	2.80628	2.79917	2.75352	2.79184	2.78753	2.83685	2.76955	2.75965	2.79409	2.77946	NA	NA	1.77932	1.78435	NA	NA	2.17693	2.164	2.78632	2.80541	2.7646	2.78678	NA	NA
ENSMUSG00000009621	Vav2	2.15487	2.13497	2.11796	2.08577	2.05847	2.12599	2.93076	3.02952	3.05796	2.86924	2.85422	3.06906	2.68623	2.65247	2.65137	2.69802	2.65613	2.69338	3.28964	3.32977	3.29285	3.29941	3.31378	3.32052	3.46091	3.47683	3.42604	3.45648	3.46524	3.44328	3.06725	3.06394	3.06807	3.03617	2.13593	2.09008	3.00608	2.93084	2.66935	2.6685	3.30409	3.31123	3.45459	3.455	3.0656	3.05212	4.00805	-1.4639
ENSMUSG00000009628	Tex15	NA	NA	NA	NA	NA	NA	NA	NA	NA	NA	NA	NA	NA	NA	NA	NA	NA	NA	2.37549	2.37599	2.35526	2.36516	2.34264	2.35497	2.22225	2.20268	2.20396	2.22421	2.17847	2.20788	2.80034	2.81681	2.77595	2.76301	NA	NA	NA	NA	NA	NA	2.36892	2.35425	2.20963	2.20352	2.80857	2.76948	NA	NA
ENSMUSG00000009630	Ppp2cb	9.56391	9.554	9.59244	9.87387	9.53647	9.50126	9.25995	8.96098	9.34067	9.32692	9.2119	9.21527	9.21859	9.32487	9.21524	9.30232	9.23066	9.21673	9.97109	9.94171	10.0104	10.0653	10.0698	10.0064	10.1847	10.1288	10.1076	10.049	10.0829	10.0811	10.072	10.0933	10.0209	10.1298	9.57012	9.6372	9.1872	9.25136	9.27173	9.2494	9.97438	10.0472	10.1403	10.071	10.0827	10.0754	787.457	0.105242
ENSMUSG00000009633	G0s2	NA	NA	NA	NA	NA	NA	NA	NA	NA	NA	NA	NA	NA	NA	NA	NA	NA	NA	NA	NA	NA	NA	NA	NA	2.09129	2.10486	2.09626	2.13574	2.1563	2.10917	NA	NA	NA	NA	NA	NA	NA	NA	NA	NA	NA	NA	2.09747	2.13374	NA	NA	NA	NA
ENSMUSG00000009640	Dmap1	7.09358	7.09424	6.97541	6.94072	7.17172	7.14849	7.11779	7.20451	6.9225	7.11232	7.20194	7.41016	7.09123	7.06101	7.08297	7.02264	7.17914	7.31584	7.82847	7.73787	7.83934	7.74134	7.79567	7.75228	7.82951	7.83173	7.89523	7.796	7.87333	7.8928	7.8607	7.86418	7.86234	7.78278	7.05441	7.08698	7.0816	7.24147	7.07612	7.09492	7.80189	7.7631	7.85216	7.85404	7.86244	7.82256	133.185	0.101162
ENSMUSG00000009647	Mcu	7.19717	7.20335	7.22186	7.18842	7.16025	7.16631	7.02	6.77221	6.93172	7.02587	7.03299	6.84981	6.987	7.03003	6.96631	6.98662	7.13963	7.04751	7.71606	7.78806	7.65616	7.81912	7.75444	7.77023	7.86257	7.80781	7.74641	7.811	7.82693	7.76766	7.78182	7.72877	7.77148	7.81368	7.20746	7.17166	6.90798	6.96956	7.00851	7.03085	7.72009	7.78126	7.8056	7.80186	7.75529	7.79258	146.065	-0.0813781
ENSMUSG00000009681	Bcr	8.49818	8.44324	8.42123	8.47815	8.39249	8.26245	8.04306	8.26339	8.23707	8.05884	8.00089	8.10828	8.3226	8.29338	8.37863	8.26289	8.4274	8.52366	8.92539	9.05924	8.89786	9.12294	9.00121	8.9494	9.02161	9.09568	8.96929	9.13974	9.0708	9.03546	9.37145	9.17801	9.25736	9.44518	8.45422	8.3777	8.18117	8.056	8.30799	8.3563	8.96083	9.02452	9.02886	9.082	9.27473	9.35127	343.429	-0.144279
ENSMUSG00000009687	Fxyd5	2.26628	2.32187	2.32857	2.26108	2.27597	2.29789	2.66055	2.75209	2.63903	2.61962	2.66195	2.67405	2.74679	2.76036	2.74229	2.72994	2.73817	2.69662	3.49794	3.49873	3.48915	3.55276	3.49863	3.52242	3.98928	4.01908	3.94565	4.0477	3.95421	3.96552	4.21558	4.27561	4.28217	4.289	2.30557	2.27832	2.68389	2.65187	2.75358	2.7368	3.49527	3.5246	3.98467	3.98914	4.2456	4.28559	4.58237	-0.709544
ENSMUSG00000009731	Kcnd1	5.3632	5.46424	5.36929	5.30752	5.28987	5.38562	5.15713	5.21011	5.11456	5.18167	5.187	4.99109	4.93805	5.04965	5.14806	5.03767	5.07021	5.12144	5.71482	5.75556	5.84434	5.76028	5.72738	5.76036	5.76172	5.81956	5.8371	5.80323	5.84994	5.79676	5.78296	5.7104	5.78751	5.84237	5.39891	5.32767	5.1606	5.11992	4.99385	5.08531	5.77158	5.74934	5.80613	5.81665	5.74668	5.81494	40.5739	-0.299315
ENSMUSG00000009733	Tfcp2	6.07176	5.91553	5.9573	5.79084	6.02081	6.04925	5.69163	5.76481	5.75257	5.83615	5.68546	5.46431	5.84037	5.91143	5.91839	5.9168	5.78781	5.8414	6.50643	6.4416	6.46626	6.47271	6.57543	6.53303	6.56418	6.55414	6.54805	6.58147	6.57873	6.58157	6.71541	6.70105	6.80403	6.79451	5.98153	5.95363	5.73634	5.66197	5.8759	5.87434	6.47143	6.52706	6.55546	6.58059	6.70823	6.79927	60.8349	-0.0594397
ENSMUSG00000009734	Pou6f2	3.02802	2.99605	3.02555	2.94753	2.9793	3.00605	3.0927	2.96503	2.99451	3.06867	2.9809	2.96327	3.01556	3.09965	3.06186	2.9871	3.04009	2.97801	4.13186	4.08758	4.1737	4.11095	4.11208	4.10989	3.722	3.72876	3.73197	3.77397	3.78009	3.78839	3.4209	3.43329	3.44133	3.41277	3.01654	2.97763	3.01742	3.00428	3.05761	3.02968	4.13105	4.11097	3.72758	3.78082	3.42709	3.42705	7.42437	-0.625815
ENSMUSG00000009739	Pou6f1	5.9395	5.94484	5.91513	5.81023	6.10999	5.79865	5.65553	6.06237	5.67221	5.75258	5.79511	5.76226	5.88621	5.82284	5.95491	6.01623	5.86241	6.027	6.75337	6.67438	6.74376	6.726	6.77438	6.64947	6.57979	6.72754	6.5855	6.49271	6.61539	6.5068	6.53632	6.48808	6.64576	6.617	5.93316	5.90629	5.7967	5.76998	5.85452	5.94452	6.72384	6.71662	6.63094	6.5383	6.5122	6.63138	59.8022	-0.0428043
ENSMUSG00000009741	Ubp1	7.19252	7.24544	7.28122	7.2426	7.16147	7.27341	7.01204	6.74274	7.13044	7.2102	7.06652	7.32904	6.78217	6.88194	7.01827	6.86571	7.06175	7.04996	7.62047	7.58387	7.66636	7.56174	7.52979	7.59738	7.66649	7.6642	7.8119	7.67505	7.74393	7.74006	7.69055	7.66234	7.47262	7.52359	7.23973	7.22583	6.96174	7.20192	6.83206	6.98191	7.62356	7.56297	7.7142	7.71968	7.67644	7.49811	150.806	-0.0301992
ENSMUSG00000009828	Ick	4.65381	4.61905	4.66326	4.56184	4.59995	4.59033	4.3143	4.3081	4.44232	4.3346	4.29864	4.41891	4.48119	4.44051	4.52581	4.40348	4.47321	4.46523	5.25723	5.24673	5.2503	5.18722	5.18174	5.1875	5.36759	5.31043	5.28914	5.39696	5.41631	5.2894	5.37087	5.37681	5.37127	5.40081	4.64538	4.58404	4.35491	4.35072	4.46085	4.4675	5.25142	5.18549	5.32238	5.36756	5.37384	5.38604	23.969	-0.371114
ENSMUSG00000009863	Sdhb	9.85503	9.94731	10.0109	9.89205	9.88861	9.92938	9.82863	9.68847	9.63024	9.90513	9.78174	9.64479	9.66056	9.76518	9.67513	9.72721	9.67798	9.71395	10.5643	10.4272	10.3462	10.3915	10.3978	10.4869	10.657	10.585	10.712	10.5282	10.5133	10.6079	10.5493	10.6525	10.5917	10.4963	9.93774	9.90335	9.71578	9.77722	9.71287	9.69344	10.4459	10.4254	10.6514	10.5498	10.6009	10.544	970.05	-0.0513415
ENSMUSG00000009894	Snap47	11.1259	11.182	11.0915	11.219	11.0662	11.1141	11.0479	11.0867	10.971	11.0227	10.9232	10.9397	10.8037	10.8619	10.9076	10.8934	10.8009	10.9258	11.6028	11.6115	11.6581	11.5734	11.5543	11.5576	11.6536	11.8727	11.7593	11.5951	11.6288	11.732	11.7754	11.7473	11.9407	11.8162	11.1331	11.1331	11.0352	10.9619	10.8328	10.8673	11.6241	11.5618	11.7619	11.652	11.7614	11.8784	2249.68	-0.00345578
ENSMUSG00000009905	Kdsr	6.7344	6.84859	6.92023	6.71745	6.69196	6.84483	6.81102	6.69053	6.78407	6.73676	6.70195	6.70727	6.68497	6.61893	6.66521	6.55036	6.61778	6.68638	7.45771	7.44902	7.48535	7.40544	7.32394	7.43626	7.42505	7.44748	7.40025	7.38078	7.46883	7.48563	7.3764	7.37284	7.49857	7.45775	6.83441	6.75141	6.76187	6.71533	6.65195	6.61112	7.46403	7.38854	7.42426	7.44508	7.37462	7.47816	110.702	-0.191915
ENSMUSG00000009907	Vps4b	7.71154	7.73788	7.77829	8.04427	7.75864	7.70683	7.61668	7.27814	7.53334	7.52342	7.48797	7.64775	7.47311	7.5282	7.41433	7.36425	7.55194	7.50156	8.16971	8.08095	7.96664	8.07767	8.02157	8.09386	8.33357	8.23755	8.31921	8.05164	8.22698	8.39127	8.20231	8.23976	8.18071	8.03086	7.74257	7.83658	7.47605	7.55305	7.50066	7.4435	8.07243	8.06437	8.29678	8.2233	8.22103	8.10579	226.47	0.168534
ENSMUSG00000009927	Rps25	4.0032	4.02162	4.0081	4.04472	4.05493	4.03331	4.17352	4.52355	4.23328	4.19521	4.39692	4.38976	4.28476	4.14497	4.16792	4.09956	4.12314	4.13179	5.03043	5.09404	5.08008	5.05485	4.97935	5.05458	4.89456	4.85191	4.87407	4.96405	4.94644	4.94286	5.08404	5.0661	5.07197	5.11124	4.01098	4.04432	4.31011	4.3273	4.21486	4.13021	5.06818	5.02959	4.87351	4.95112	5.07507	5.0916	16.5118	0.28134
ENSMUSG00000009995	Taz	6.25262	6.17	6.11346	6.06616	6.10331	6.17304	5.73439	5.91871	5.97881	5.86048	6.01599	5.67045	6.1667	6.16377	6.19337	5.97554	6.2041	6.22555	6.84453	6.84025	6.91861	6.74077	6.88388	6.84149	6.92322	6.85912	7.01933	7.00858	6.95118	6.86803	7.02233	7.01795	6.96398	7.01667	6.17869	6.11417	5.8773	5.84897	6.16523	6.12434	6.86779	6.82205	6.93389	6.9426	7.02014	6.99033	69.9512	-0.188445
ENSMUSG00000010025	Aldh3a2	7.47543	7.51701	7.50323	7.57734	7.45384	7.46465	7.32119	7.35349	7.26276	7.46668	7.23069	7.16349	7.52291	7.45478	7.46763	7.4911	7.46914	7.38616	8.14623	8.07565	8.03614	8.09057	8.11943	8.08319	8.39301	8.40538	8.28676	8.35764	8.32453	8.40002	8.35715	8.34937	8.42101	8.22139	7.49855	7.49861	7.31248	7.28695	7.48884	7.47596	8.08601	8.09773	8.36171	8.36073	8.35326	8.3212	182.076	-0.0151984
ENSMUSG00000010044	Zmynd10	2.09405	2.08545	2.05808	2.11633	2.0754	2.13601	NA	NA	NA	NA	NA	NA	NA	NA	NA	NA	NA	NA	1.97224	2.02116	2.00824	1.9833	2.00973	2.00218	2.06083	2.07605	2.08702	2.05329	2.05107	2.07163	NA	NA	NA	NA	2.07919	2.10925	NA	NA	NA	NA	2.00055	1.9984	2.07463	2.05866	NA	NA	4.50715	0.833671
ENSMUSG00000010045	Tmem115	6.22908	6.12138	6.26234	6.12331	6.114	6.32939	5.91269	6.18315	6.12743	5.89923	6.09554	5.93956	5.7063	5.7198	5.73224	5.81138	5.80341	5.77343	6.77129	6.81523	6.87252	6.86327	6.79715	6.77391	6.7823	6.83285	6.89495	6.83027	6.91782	6.73929	6.71069	6.7431	6.67129	6.6901	6.20426	6.1889	6.07442	5.97811	5.71305	5.78234	6.81968	6.81144	6.8367	6.82913	6.72689	6.6807	72.9978	-0.0190968
ENSMUSG00000010047	Hyal2	3.76491	3.78379	3.74452	3.8057	3.68775	3.69663	3.85504	3.98344	3.84589	3.8399	3.87208	3.82987	3.06451	3.12802	3.08547	3.12349	3.07137	3.10807	4.35816	4.35215	4.38953	4.39661	4.32881	4.3306	4.43789	4.45746	4.39671	4.45173	4.44616	4.44646	4.43182	4.4815	4.50005	4.53933	3.76441	3.73003	3.89479	3.84728	3.09627	3.09344	4.36661	4.35201	4.43069	4.44811	4.45666	4.51969	14.2561	-0.379074
ENSMUSG00000010048	Ifrd2	NA	NA	NA	NA	NA	NA	NA	NA	NA	NA	NA	NA	NA	NA	NA	NA	NA	NA	2.16442	2.17274	2.21387	2.17639	2.18637	2.20786	NA	NA	NA	NA	NA	NA	NA	NA	NA	NA	NA	NA	NA	NA	NA	NA	2.18368	2.19021	NA	NA	NA	NA	NA	NA
ENSMUSG00000010054	Tusc2	6.06639	6.0682	6.04501	6.04166	5.96124	5.95665	5.81501	6.0123	6.04483	5.82118	5.96134	5.9673	5.59441	5.6137	5.73122	5.67502	5.59954	5.76281	6.43121	6.53795	6.70413	6.59889	6.46012	6.44283	6.52163	6.55431	6.59955	6.51507	6.5718	6.46891	6.54985	6.5509	6.57949	6.65914	6.05987	5.98651	5.95738	5.91661	5.60406	5.66859	6.55776	6.50061	6.5585	6.51859	6.55037	6.61931	65.4513	-0.251586
ENSMUSG00000010057	Nprl2	7.15886	7.1405	7.00434	6.93279	7.01068	6.97589	6.95007	7.12312	7.02536	6.95323	7.00158	6.99024	6.85695	6.89995	7.0193	6.89334	6.99851	7.00398	7.76745	7.73345	7.69655	7.74637	7.83126	7.72817	7.78706	7.85726	7.86393	7.81102	7.82567	7.89175	7.90601	7.90806	7.95632	7.9953	7.10124	6.97312	7.03285	6.98169	6.87845	6.97038	7.73248	7.7686	7.83608	7.84281	7.90704	7.97581	130.525	-0.290571
ENSMUSG00000010064	Slc38a3	5.0757	4.95741	5.03452	5.26657	4.99928	5.15	5.43066	5.44619	5.32377	5.28247	5.44492	5.97851	4.6992	4.60467	4.58431	4.63301	4.65847	4.63331	5.77554	5.69272	5.69805	5.73548	5.74193	5.68694	6.16954	6.24634	6.22398	6.4397	6.4056	6.21134	6.43691	6.43451	6.57177	6.64907	5.02254	5.13861	5.40021	5.56863	4.65194	4.62527	5.7221	5.72145	6.21329	6.35221	6.43571	6.61042	36.7523	0.551113
ENSMUSG00000010066	Cacna2d2	6.6025	6.50426	6.63019	6.51028	6.46898	6.85313	6.11376	6.35576	6.21671	6.2262	6.5833	6.28295	6.11964	6.31056	6.24451	6.16048	6.44634	6.3094	7.18962	7.11161	7.0391	7.24908	7.08522	6.92544	7.25647	7.24932	7.39045	7.4991	7.51711	7.32641	7.87305	7.68912	7.51623	7.6088	6.57898	6.6108	6.22874	6.36415	6.2151	6.28377	7.11344	7.08658	7.29875	7.44754	7.78109	7.56252	96.9737	0.129525
ENSMUSG00000010067	Rassf1	5.40109	5.45862	5.46933	5.61246	5.38627	5.48771	5.32403	5.54091	5.17573	5.34795	5.3825	5.16851	5.32736	5.3033	5.38959	5.23602	5.3416	5.33481	5.7578	5.82296	5.83757	5.80371	5.82914	5.83086	5.96099	6.13424	6.18731	6.09385	6.14331	6.19865	5.87171	6.00307	5.99143	5.88496	5.44301	5.49548	5.34689	5.29965	5.31533	5.3224	5.80611	5.82124	6.09418	6.14527	5.93739	5.9382	46.4785	0.1959
ENSMUSG00000010086	Rnf112	9.66503	9.60737	9.55334	9.42609	9.53093	9.52119	9.52149	9.80952	9.33781	9.46599	9.49672	9.26738	9.29921	9.44657	9.4396	9.48361	9.35151	9.56513	10.2122	10.1721	10.2922	10.2132	10.1949	10.0303	10.1645	10.2563	10.3245	10.2686	10.1878	10.2177	10.2263	10.2033	10.2853	10.2886	9.60858	9.49274	9.55627	9.41003	9.37289	9.4249	10.2255	10.1461	10.2484	10.2247	10.2148	10.287	750.233	-0.170404
ENSMUSG00000010095	Slc3a2	9.21807	9.12035	8.98408	8.95389	9.10324	9.13574	8.93413	9.03856	9.01927	8.98655	9.01546	9.06606	8.86305	8.80045	8.88088	8.83031	8.92861	8.81555	9.73861	9.61688	9.78262	9.73757	9.72053	9.62987	9.72798	9.74703	9.78081	9.82776	9.83473	9.87529	9.71205	9.74325	9.879	9.96384	9.1075	9.06429	8.99732	9.02269	8.83175	8.87993	9.7127	9.69599	9.75194	9.84593	9.72765	9.92142	543.603	-0.0616666
ENSMUSG00000010097	Nxf1	7.36947	7.45346	7.41919	7.20644	7.4556	7.27768	7.24415	7.25415	7.48636	7.34207	7.16972	7.52933	7.25074	7.23456	7.15008	7.1719	7.10941	7.19321	7.87557	7.83415	7.83512	7.77746	7.86149	7.8405	8.15205	8.11805	8.08524	8.09208	7.98315	7.99821	8.14264	8.20461	8.00154	8.00915	7.41404	7.31324	7.32822	7.34704	7.24265	7.1438	7.84828	7.82648	8.11845	8.02448	8.17362	8.00534	163.631	-0.182989
ENSMUSG00000010110	Stx5a	7.60262	7.66314	7.59133	7.93386	7.59163	7.55331	7.30248	7.30026	7.22719	7.40544	7.33906	7.14001	7.00618	7.09519	7.12771	7.15159	7.08306	7.26802	7.9638	7.96519	7.91829	7.85819	7.92514	7.90675	8.19309	8.31332	8.31164	8.09879	8.2204	8.19242	8.15691	8.18626	8.03942	8.04809	7.61903	7.69294	7.27664	7.29484	7.05068	7.12079	7.94909	7.89669	8.27269	8.17053	8.17158	8.04376	207.333	0.137573
ENSMUSG00000010154	Spire2	4.20996	4.05875	4.07506	4.02242	4.16402	4.08323	4.19392	4.1441	4.12394	4.12221	4.15872	4.36471	3.74839	3.72575	3.79133	3.7171	3.72536	3.74307	4.86006	4.93859	4.86836	4.88054	4.90894	4.86185	4.66497	4.64486	4.69969	4.72282	4.70808	4.81639	4.73819	4.71909	4.72799	4.77807	4.11459	4.08989	4.15398	4.21521	3.73707	3.74459	4.889	4.88378	4.66984	4.7491	4.72864	4.75303	16.2953	-0.203173
ENSMUSG00000010175	Prox1	2.47568	2.51167	2.49995	2.44828	2.459	2.50508	2.01525	2.0393	1.97413	1.98915	2.09604	2.06012	2.73033	2.77004	2.75025	2.83523	2.75553	2.74805	2.86849	2.79746	2.81872	2.80233	2.82264	2.86352	3.14768	3.15741	3.18719	3.23245	3.20934	3.15604	3.86512	3.81558	3.81411	3.94109	2.49577	2.47079	2.00956	2.04844	2.75019	2.78034	2.82822	2.8295	3.16409	3.19927	3.84035	3.8776	5.17486	-0.554965
ENSMUSG00000010277	2610507B11Rik	8.21611	8.12156	8.26971	8.3704	8.34415	7.97763	7.90602	7.76546	7.96455	7.85404	7.66934	7.77621	7.9618	8.06167	7.93523	8.11638	7.97551	7.97589	8.52461	8.61356	8.49087	8.77047	8.8996	8.69341	8.83595	8.85064	8.51905	8.74972	8.66042	8.6255	8.70757	8.5687	8.82541	8.77338	8.20246	8.23073	7.87867	7.76653	8.01174	8.00904	8.54301	8.78783	8.73521	8.67854	8.63814	8.7994	302.542	0.0608527
ENSMUSG00000010290	AI597479	6.13641	6.27669	6.24048	6.33893	6.21898	6.3106	6.21347	6.09362	6.0143	6.07848	6.16961	6.0901	6.29116	6.06154	5.94325	6.13853	6.20006	6.03301	6.9583	6.94148	6.87163	6.85062	6.91991	6.88668	6.90769	6.73916	6.72952	6.80835	6.88163	6.72746	6.85236	7.03083	6.8936	6.84625	6.21786	6.2895	6.10713	6.11273	6.17635	6.09395	6.92381	6.88574	6.79212	6.80581	6.9416	6.86992	77.6726	0.195403
ENSMUSG00000010307	Tmem86a	4.54547	4.55774	4.50665	4.77662	4.43692	4.56282	4.34202	4.35275	4.37318	4.23278	4.39217	4.15253	3.76765	3.76395	3.81478	3.7759	3.76884	3.77618	4.72049	4.602	4.665	4.61569	4.60673	4.60233	5.13056	5.11516	5.11577	5.14022	5.07655	5.06769	4.78662	4.77618	4.7158	4.75942	4.53662	4.59212	4.35598	4.25916	3.7658	3.7865	4.66249	4.60825	5.1205	5.09482	4.7814	4.73761	26.8122	0.391393
ENSMUSG00000010311	Optc	NA	NA	NA	NA	NA	NA	1.48204	1.52798	1.61402	1.47331	1.58331	1.64005	NA	NA	NA	NA	NA	NA	NA	NA	NA	NA	NA	NA	2.54453	2.55116	2.59032	2.55482	2.59244	2.56703	2.54462	2.5311	2.51011	2.51948	NA	NA	1.54135	1.56556	NA	NA	NA	NA	2.562	2.57143	2.53786	2.5148	NA	NA
ENSMUSG00000010358	Ifi35	NA	NA	NA	NA	NA	NA	NA	NA	NA	NA	NA	NA	NA	NA	NA	NA	NA	NA	NA	NA	NA	NA	NA	NA	2.47372	2.53529	2.49033	2.47506	2.5143	2.52479	2.36406	2.37724	2.39774	2.39804	NA	NA	NA	NA	NA	NA	NA	NA	2.49978	2.50472	2.37065	2.39789	NA	NA
ENSMUSG00000010362	Rdm1	NA	NA	NA	NA	NA	NA	NA	NA	NA	NA	NA	NA	NA	NA	NA	NA	NA	NA	NA	NA	NA	NA	NA	NA	1.63081	1.58218	1.59245	1.62401	1.5876	1.5844	NA	NA	NA	NA	NA	NA	NA	NA	NA	NA	NA	NA	1.60181	1.59867	NA	NA	NA	NA
ENSMUSG00000010376	Nedd8	7.48034	7.33904	7.37177	7.03773	7.51165	7.50681	7.53481	7.73265	7.54299	7.40743	7.62044	7.43181	7.99789	7.53675	7.5897	7.53645	7.58616	7.62911	8.33994	8.45043	8.47127	8.63887	8.36357	8.46993	8.13117	8.21428	8.08761	8.34916	8.44261	8.26759	8.54691	8.5444	8.5986	8.62027	7.39705	7.35206	7.60348	7.48656	7.76732	7.57077	8.42055	8.49079	8.14436	8.35312	8.54565	8.60944	164.269	-0.0413333
ENSMUSG00000010392	Gosr1	6.51271	6.44518	6.47964	6.40473	6.53919	6.46444	6.48791	6.36314	6.3994	6.35843	6.42487	6.3284	6.72453	6.62783	6.48726	6.56162	6.61245	6.48333	7.20753	7.1964	7.15793	7.24832	7.25967	7.2752	7.20144	7.25202	7.11471	7.26144	7.30268	7.33193	7.36223	7.31825	7.36027	7.35271	6.47918	6.46945	6.41682	6.37057	6.67618	6.55378	7.18729	7.26106	7.18939	7.29869	7.34024	7.35649	88.1736	-0.00716485
ENSMUSG00000010406	Mrpl52	5.65912	5.68462	5.66691	5.45721	5.55896	5.65255	5.47656	5.52209	5.45684	5.49072	5.55117	5.37691	5.52944	5.49491	5.47311	5.42648	5.48833	5.38733	6.35996	6.29453	6.24863	6.36584	6.20801	6.28391	6.26836	6.25693	6.18395	6.21374	6.20513	6.23439	6.34525	6.34089	6.32694	6.35927	5.67022	5.55624	5.48516	5.47293	5.51218	5.46264	6.30104	6.28592	6.23641	6.21775	6.34307	6.34311	47.3521	-0.402265
ENSMUSG00000010453	Kansl3	7.25687	7.20455	7.11445	6.92374	7.08729	7.08226	6.86771	7.1394	7.07064	6.94881	7.01562	6.82129	6.91597	6.90394	6.97084	6.86877	7.06623	6.93097	7.73811	7.76243	7.70853	7.76181	7.90132	7.78872	7.83973	7.85572	7.84699	7.84548	7.84023	7.85701	7.91082	7.96551	8.00863	8.04815	7.19195	7.0311	7.02592	6.92857	6.90996	6.96861	7.73635	7.81728	7.84748	7.84757	7.93816	8.02839	136.854	-0.33994
ENSMUSG00000010461	Eya4	NA	NA	NA	NA	NA	NA	NA	NA	NA	NA	NA	NA	NA	NA	NA	NA	NA	NA	2.30661	2.28245	2.31254	2.30434	2.29607	2.29468	2.67551	2.69256	2.74073	2.7117	2.66545	2.67992	3.34371	3.31252	3.32554	3.28386	NA	NA	NA	NA	NA	NA	2.30053	2.29836	2.70293	2.68569	3.32811	3.3047	NA	NA
ENSMUSG00000010505	Myt1	4.37616	4.35532	4.30083	4.33023	4.44547	4.35663	4.33701	4.50799	4.32715	4.2108	4.41755	4.28775	4.08996	4.2279	4.20538	4.07992	4.13853	4.10656	5.08175	5.10434	5.09379	5.05579	5.02074	5.10135	5.00269	5.0384	5.00011	5.00405	5.05391	5.10078	5.16911	5.1972	5.16107	5.1963	4.3441	4.37744	4.39071	4.30537	4.15893	4.14128	5.09329	5.05929	5.01373	5.05291	5.18315	5.17868	20.125	0.250742
ENSMUSG00000010517	Faf1	7.67121	7.69715	7.66219	7.72403	7.68071	7.70434	7.60519	7.41172	7.42682	7.45205	7.48207	7.30786	7.44995	7.45874	7.40586	7.50557	7.55118	7.36665	8.19689	8.20203	8.15496	8.14662	8.1636	8.22993	8.35096	8.46379	8.29448	8.17699	8.34172	8.3624	8.226	8.20799	8.16343	8.11911	7.67685	7.70303	7.48125	7.41399	7.45435	7.48754	8.18463	8.18005	8.36974	8.2937	8.217	8.14127	206.93	0.045404
ENSMUSG00000010538	Tsacc	NA	NA	NA	NA	NA	NA	NA	NA	NA	NA	NA	NA	NA	NA	NA	NA	NA	NA	2.29227	2.28461	2.28078	2.26311	2.30186	2.28631	2.87164	2.90701	2.94606	2.92495	2.88674	2.91564	2.37395	2.3811	2.40159	2.3962	NA	NA	NA	NA	NA	NA	2.28589	2.28376	2.90824	2.90911	2.37752	2.39889	NA	NA
ENSMUSG00000010554	Mettl16	6.28736	6.28433	6.2377	6.28678	6.2313	6.30897	6.28089	6.09067	6.4542	6.33549	6.1545	6.59505	6.32991	6.25088	6.40785	6.29734	6.28592	6.3548	6.6812	6.74606	6.77871	6.77563	6.74881	6.73303	7.10356	7.10172	7.10233	7.08984	7.16545	7.18235	7.15725	7.22517	7.06372	6.89785	6.2698	6.27568	6.27525	6.36168	6.2904	6.33037	6.73532	6.75249	7.10254	7.14588	7.19121	6.98078	77.4739	0.0128213
ENSMUSG00000010592	Dazl	3.2201	3.28315	3.28162	3.34268	3.25046	3.32203	3.16886	3.11928	3.17266	3.1761	3.17877	3.05402	2.92164	2.89875	2.90007	2.85704	2.8961	2.93425	3.67378	3.76664	3.73425	3.67622	3.73983	3.68388	4.15307	4.18312	4.17093	4.19671	4.14838	4.21156	3.98985	3.99164	3.99442	3.99165	3.26162	3.30506	3.1536	3.1363	2.9102	2.8844	3.72489	3.69998	4.16904	4.18555	3.99075	3.99304	10.5687	0.555748
ENSMUSG00000010607	Pigyl	5.06725	4.96122	5.04842	4.96648	5.0984	4.97055	4.92946	5.0684	4.99017	4.98178	4.94346	4.91128	5.19901	5.0909	5.11544	5.05472	5.05148	5.2439	5.62865	5.69416	5.6495	5.65926	5.65322	5.64281	5.76139	5.74892	5.79234	5.91318	5.84917	5.75481	5.69613	5.79646	5.76409	5.6524	5.02563	5.01181	4.99601	4.94551	5.14496	5.07388	5.65743	5.65176	5.76755	5.83905	5.7463	5.70824	31.9858	-0.0500544
ENSMUSG00000010608	Rbm25	8.80018	8.88075	8.9891	8.74872	8.91374	9.08295	8.86917	8.66658	8.70099	8.86562	8.78365	8.75316	8.90534	8.78346	8.76455	8.75691	8.84851	8.72729	9.47314	9.53792	9.43756	9.44093	9.40022	9.59238	9.70515	9.46606	9.49785	9.52786	9.57367	9.62485	9.57409	9.61494	9.27379	9.26437	8.89001	8.91514	8.74558	8.80081	8.8444	8.78999	9.48287	9.47784	9.55636	9.57546	9.59451	9.26908	479.686	0.0662627
ENSMUSG00000010609	Psen2	5.45758	5.45336	5.46416	5.60071	5.48933	5.53933	5.276	5.47302	5.55353	5.39351	5.53865	5.36845	4.85642	4.93981	5.01403	4.95282	4.9307	4.91752	5.94256	5.9159	6.08794	5.90339	5.91236	5.91147	6.09478	5.99967	6.20269	6.23528	6.06062	6.11662	6.1867	6.20997	6.18332	6.23213	5.45836	5.54312	5.43418	5.43354	4.89811	4.96585	5.98213	5.90907	6.09905	6.13751	6.19834	6.20772	46.689	0.320042
ENSMUSG00000010660	Plcd1	4.82972	4.71776	4.7118	4.81746	4.77751	4.8132	4.39683	4.48396	4.44669	4.50459	4.49282	4.41478	4.28177	4.33604	4.37778	4.3368	4.31162	4.37109	5.08191	5.11107	5.07306	5.02568	5.04897	5.07131	5.30052	5.35652	5.31622	5.3104	5.34076	5.31939	5.41073	5.38501	5.37574	5.32847	4.75309	4.80272	4.4425	4.47073	4.30891	4.34207	5.08868	5.04865	5.32442	5.32352	5.39787	5.35211	27.9465	0.262771
ENSMUSG00000010663	Fads1	7.08437	7.02516	6.99217	6.77831	7.09519	7.11876	7.04642	7.20499	7.1898	7.18391	7.15361	7.41901	6.80739	6.95292	6.92947	6.92798	6.87132	7.14554	7.75776	7.67075	7.68335	7.73745	7.75955	7.72386	8.00319	8.14757	8.14733	8.17984	8.05266	8.12196	7.95534	7.94512	8.07001	7.98355	7.0339	6.99742	7.14707	7.25218	6.88015	6.90959	7.70395	7.74029	8.09936	8.11815	7.95023	8.02678	127.382	-0.0372704
ENSMUSG00000010721	Lmbr1	7.12662	7.21181	7.10568	7.0781	7.16847	7.1852	6.94843	6.73118	6.97996	7.02957	6.92905	6.83088	6.81559	6.74737	6.81646	6.77337	6.77783	6.74023	7.38563	7.33575	7.44479	7.32404	7.36917	7.40791	7.77804	7.61999	7.6775	7.63669	7.66434	7.70532	7.40453	7.38917	7.33581	7.29894	7.14804	7.14392	6.88652	6.92983	6.78148	6.78922	7.38872	7.36704	7.69184	7.66878	7.39685	7.31738	140.835	0.0023389
ENSMUSG00000010755	Cars	7.71859	7.58951	7.66079	7.65773	7.61012	7.67407	7.43184	7.57185	7.58739	7.58756	7.49535	7.27451	7.53635	7.46134	7.58839	7.4793	7.45721	7.47591	8.22711	8.34197	8.33803	8.38617	8.31066	8.32715	8.28425	8.32536	8.30122	8.28077	8.27207	8.31314	8.27348	8.14138	8.22622	8.30506	7.6563	7.64731	7.53036	7.45247	7.49885	7.5083	8.30237	8.34133	8.30361	8.28866	8.20743	8.26564	201.439	-0.0204761
ENSMUSG00000010797	Wnt2	3.77564	3.77232	3.7925	3.77067	3.67304	3.77447	4.00244	4.10427	4.14862	3.96047	4.00277	3.97476	3.50694	3.54069	3.54043	3.66468	3.61954	3.50103	4.79219	4.67054	4.71599	4.80207	4.78098	4.71466	4.69757	4.7887	4.75849	4.66036	4.69786	4.67903	4.48744	4.45409	4.46352	4.42858	3.78015	3.73939	4.08511	3.97933	3.52382	3.60822	4.72624	4.7659	4.74825	4.67908	4.47076	4.44605	13.8092	-0.415913
ENSMUSG00000010803	Gabra1	12.3092	12.349	12.4495	12.6816	12.4087	12.4193	12.2578	11.8605	12.0841	12.2689	12.1408	12.198	12.2007	12.0908	12.0831	12.2436	12.0703	11.9205	12.8637	12.8124	12.8679	12.7863	12.8871	12.8964	13.0918	13.0021	13.0159	12.8914	12.8918	12.9739	12.8611	12.9845	12.737	12.6707	12.3692	12.5032	12.0675	12.2025	12.1457	12.1323	12.848	12.8566	13.0366	12.919	12.9228	12.7039	5580.05	0.191197
ENSMUSG00000010825	Grid2ip	3.22296	3.24272	3.16915	3.2435	3.1979	3.15458	2.73553	2.79238	2.669	2.68621	2.68009	2.63077	3.19611	3.17874	3.1301	3.2289	3.17858	3.21632	3.65076	3.7289	3.65963	3.67133	3.70959	3.65896	4.05447	4.06791	4.08933	4.03599	4.09373	4.01263	3.92807	3.87322	3.91001	3.87459	3.21161	3.19866	2.7323	2.66569	3.18743	3.1792	3.67976	3.67996	4.07057	4.04745	3.90065	3.8923	9.69041	-0.210294
[truncated: 12,670 more rows]
[truncated: 22 more columns]
