# Supplementary material for: Prions induce minor genome-wide translational changes in neurons compared to glia
Source: bioRxiv preprint, doi:10.1101/2020.06.26.172841, version 1 (2020-06-27)
Supplement: Supplementary File 5 [file 172841_file08.xlsx]

## Sheet: SupplementaryTable5
GeneID	MGIsymbol	CamKIIaHC_2wpi_Ctrl_1	CamKIIaHC_2wpi_Ctrl_2	CamKIIaHC_2wpi_Ctrl_3	CamKIIaHC_2wpi_PrD_1	CamKIIaHC_2wpi_PrD_2	CamKIIaHC_2wpi_PrD_3	CamKIIaHC_4wpi_Ctrl_1	CamKIIaHC_4wpi_Ctrl_2	CamKIIaHC_4wpi_Ctrl_3	CamKIIaHC_4wpi_PrD_1	CamKIIaHC_4wpi_PrD_2	CamKIIaHC_4wpi_PrD_3	CamKIIaHC_8wpi_Ctrl_1	CamKIIaHC_8wpi_Ctrl_2	CamKIIaHC_8wpi_Ctrl_3	CamKIIaHC_8wpi_PrD_1	CamKIIaHC_8wpi_PrD_2	CamKIIaHC_8wpi_PrD_3	CamKIIaHC_16wpi_Ctrl_1	CamKIIaHC_16wpi_Ctrl_2	CamKIIaHC_16wpi_Ctrl_3	CamKIIaHC_16wpi_PrD_1	CamKIIaHC_16wpi_PrD_2	CamKIIaHC_16wpi_PrD_3	CamKIIaHC_24wpi_Ctrl_1	CamKIIaHC_24wpi_Ctrl_2	CamKIIaHC_24wpi_Ctrl_3	CamKIIaHC_24wpi_PrD_1	CamKIIaHC_24wpi_PrD_2	CamKIIaHC_24wpi_PrD_3	CamKIIaHC_term_Ctrl_1	CamKIIaHC_term_Ctrl_2	CamKIIaHC_term_Ctrl_3	CamKIIaHC_term_PrD_1	CamKIIaHC_term_PrD_2	CamKIIaHC_term_PrD_3	CamKIIaHC_2wpi_Ctrl	CamKIIaHC_2wpi_PrD	CamKIIaHC_4wpi_Ctrl	CamKIIaHC_4wpi_PrD	CamKIIaHC_8wpi_Ctrl	CamKIIaHC_8wpi_PrD	CamKIIaHC_16wpi_Ctrl	CamKIIaHC_16wpi_PrD	CamKIIaHC_24wpi_Ctrl	CamKIIaHC_24wpi_PrD	CamKIIaHC_term_Ctrl	CamKIIaHC_term_PrD
ENSMUSG00000000001	Gnai3	6.55537	6.6317	6.56574	6.57457	6.5541	6.62715	6.62164	6.41933	6.63097	6.57595	6.7995	6.56133	6.2146	6.27654	6.34441	6.12403	6.28406	6.19397	6.04011	6.16511	6.21903	6.09783	6.15047	6.0102	6.79814	6.85767	6.92848	6.99819	6.95365	7.07653	7.89304	7.71888	7.61916	7.82465	7.69556	7.69493	6.58427	6.58527	6.55731	6.64559	6.24557	6.25083	6.14142	6.08616	6.86143	7.00946	7.74369	7.73838
ENSMUSG00000000028	Cdc45	2.76151	2.72347	2.76735	2.72005	2.75452	2.71038	2.07492	2.08998	2.02818	2.05368	2.03239	2.11869	2.13267	2.12525	2.0852	2.11463	2.13623	2.11337	NA	NA	NA	NA	NA	NA	2.79767	2.7384	2.82308	2.73316	2.78061	2.76817	3.56697	3.54838	3.55863	3.52649	3.56958	3.59281	2.75078	2.72832	2.06436	2.06825	2.12896	2.11202	NA	NA	2.78638	2.76064	3.558	3.56296
ENSMUSG00000000049	Apoh	NA	NA	NA	NA	NA	NA	1.90336	1.9008	1.91053	2.02419	2.17284	1.92801	NA	NA	NA	NA	NA	NA	NA	NA	NA	NA	NA	NA	NA	NA	NA	NA	NA	NA	1.70482	1.66688	1.65393	1.64817	1.647	1.71498	NA	NA	1.9049	2.04168	NA	NA	NA	NA	NA	NA	1.67521	1.67005
ENSMUSG00000000056	Narf	6.85792	6.81141	6.84496	6.79959	6.86708	6.91128	6.72478	6.57336	6.45123	6.62215	6.42082	6.55566	6.45301	6.45927	6.59372	6.57366	6.61828	6.5246	6.31164	6.24537	6.21703	6.26545	6.1906	6.14379	6.6422	6.73318	6.76678	6.77002	6.79355	6.73848	7.52384	7.65772	7.59257	7.45838	7.30998	7.3966	6.8381	6.85932	6.58313	6.53288	6.45614	6.59522	6.25802	6.19995	6.71406	6.76735	7.59138	7.38832
ENSMUSG00000000058	Cav2	5.27594	5.40993	5.19067	5.17958	5.40906	5.4357	5.48936	5.22768	5.25157	5.42938	5.57261	5.66706	4.87131	4.70342	4.73323	4.9749	4.78509	4.77636	4.65641	4.64211	4.53736	4.45273	4.36985	4.59719	5.15862	4.79649	4.9154	4.70736	4.65793	4.8616	5.53482	5.09018	5.38458	5.24693	5.089	5.1699	5.29218	5.34145	5.32287	5.55635	4.78736	4.83107	4.61196	4.47325	4.95683	4.7423	5.33653	5.16861
ENSMUSG00000000078	Klf6	6.27615	6.28083	6.33406	6.26632	6.28627	6.2675	5.67309	5.93501	5.71864	5.97072	5.5359	5.81754	5.81493	5.70658	5.79234	5.82255	5.74856	5.86389	5.83428	5.85748	5.88223	5.76855	5.84493	6.0211	6.48364	6.43341	6.38419	6.24346	6.20432	6.26557	7.08597	7.15865	7.12717	7.00311	7.01253	6.89284	6.29701	6.27336	5.77558	5.77472	5.76076	5.78782	5.85799	5.87819	6.43375	6.23778	7.12393	6.9695
ENSMUSG00000000085	Scmh1	5.42528	5.41636	5.5193	5.37774	5.44397	5.35004	5.10455	4.92017	5.03687	5.0592	5.07703	4.98768	5.26078	5.11962	5.17453	5.13429	5.10751	5.23994	4.96169	4.92308	5.03968	4.89827	5.06114	4.97402	5.17843	5.22865	5.01762	5.13886	5.13263	5.13063	6.24135	6.25924	6.32682	6.38855	6.27186	6.33201	5.45365	5.39058	5.02053	5.0413	5.1902	5.13878	4.97482	4.97781	5.14156	5.13404	6.2758	6.33081
ENSMUSG00000000088	Cox5a	9.88853	9.91384	9.8523	9.96248	9.86076	9.93671	9.41592	9.59012	9.54709	9.37985	9.47354	9.54682	9.66033	9.51096	9.49904	9.51283	9.52207	9.70104	9.64761	9.47666	9.67187	9.5695	9.57369	9.56242	10.0294	9.98925	9.86533	9.9077	9.87569	9.91779	10.8041	10.7793	10.9449	10.8097	10.7503	10.7718	9.88489	9.91998	9.51771	9.46674	9.58565	9.51131	9.59871	9.56854	9.96133	9.90039	10.8428	10.7773
ENSMUSG00000000120	Ngfr	NA	NA	NA	NA	NA	NA	NA	NA	NA	NA	NA	NA	NA	NA	NA	NA	NA	NA	1.95372	1.99444	2.03288	1.96974	1.95617	2.05302	2.36969	2.35769	2.35441	2.32456	2.33218	2.36733	2.86295	2.83157	2.91697	2.83527	2.81543	2.78771	NA	NA	NA	NA	NA	NA	1.99368	1.99298	2.36059	2.34135	2.87049	2.81281
ENSMUSG00000000126	Wnt9a	NA	NA	NA	NA	NA	NA	2.31631	2.27201	2.30228	2.23937	2.30415	2.27849	NA	NA	NA	NA	NA	NA	NA	NA	NA	NA	NA	NA	1.66012	1.61034	1.60444	1.64665	1.62733	1.60534	2.74543	2.76462	2.7562	2.74446	2.76192	2.75447	NA	NA	2.29687	2.274	NA	NA	NA	NA	1.62497	1.62644	2.75541	2.75361
ENSMUSG00000000127	Fer	7.10756	7.08338	7.13061	7.13228	7.12197	7.02806	6.76405	6.83726	6.82881	7.06005	6.92368	6.64907	6.82782	6.85619	6.73313	6.73654	6.71702	6.72128	6.2591	6.45303	6.39598	6.45403	6.49249	6.29172	7.07619	7.03833	7.00229	7.03673	7.14019	7.10964	8.01217	7.86779	7.8591	8.09495	7.94933	8.05005	7.10719	7.0941	6.81004	6.8776	6.84201	6.72889	6.36937	6.41275	7.03894	7.09552	7.91302	8.03144
ENSMUSG00000000131	Xpo6	7.59153	7.6678	7.54573	7.63296	7.53898	7.54252	7.23403	7.13974	7.18572	6.91661	7.02341	7.15159	7.38596	7.28822	7.33078	7.26769	7.28101	7.27952	6.87024	7.09316	7.07691	7.08261	7.06762	7.08334	7.6757	7.52192	7.54307	7.64656	7.58061	7.70177	8.48594	8.4401	8.5024	8.53554	8.4902	8.64192	7.60169	7.57149	7.18649	7.03054	7.33709	7.29316	7.01344	7.07786	7.58023	7.64298	8.47614	8.55589
ENSMUSG00000000134	Tfe3	5.8927	5.97691	5.96375	6.01654	5.9503	5.94345	5.50252	5.48055	5.45171	5.45685	5.37014	5.58347	5.42478	5.55317	5.49788	5.41764	5.59418	5.51886	5.59562	5.62242	5.56813	5.54498	5.62334	5.58351	5.82842	5.84651	5.91937	6.02014	5.98515	5.94993	6.5922	6.83518	6.70016	6.65175	6.818	6.75086	5.94445	5.9701	5.47826	5.47015	5.48897	5.50324	5.59539	5.58394	5.86477	5.98507	6.70918	6.74021
ENSMUSG00000000142	Axin2	4.10445	4.11861	4.17153	4.16079	4.10255	4.16126	4.12896	3.9926	4.03624	4.09157	3.96928	4.03176	4.03581	4.08618	4.09258	4.12882	4.12286	4.08797	3.90652	3.90909	3.84314	3.84667	3.94219	3.90933	4.29776	4.26283	4.24831	4.25993	4.26634	4.25119	5.31889	5.23621	5.4226	5.31322	5.34661	5.23784	4.13153	4.14153	4.0526	4.03087	4.06099	4.11475	3.88625	3.89939	4.26963	4.25916	5.3259	5.29922
ENSMUSG00000000148	Brat1	4.74608	4.79971	4.69557	4.7251	4.70689	4.6621	3.85999	3.96392	3.98169	3.87278	3.81721	3.93323	4.51735	4.43486	4.41142	4.44495	4.44513	4.46624	3.90803	3.9048	3.91415	3.97333	3.99992	3.94402	4.35321	4.41636	4.5098	4.41697	4.46276	4.38628	5.42392	5.52274	5.46941	5.55752	5.62262	5.52932	4.74712	4.69803	3.9352	3.87441	4.47611	4.43383	3.90899	3.97242	4.42646	4.422	5.47202	5.56982
ENSMUSG00000000149	Gna12	3.84664	3.82181	3.78417	3.80536	3.80462	3.81442	3.6983	3.62303	3.5708	3.69145	3.61472	3.56719	3.41014	3.38799	3.40032	3.39203	3.47641	3.39191	3.40647	3.45618	3.49423	3.4779	3.52523	3.47052	3.52492	3.56587	3.54547	3.54914	3.56521	3.57112	5.20138	5.18382	5.17872	5.067	5.22525	5.23325	3.81754	3.80813	3.63071	3.62445	3.39907	3.42292	3.45229	3.49122	3.54542	3.56183	5.18797	5.17517
ENSMUSG00000000167	Pih1d2	NA	NA	NA	NA	NA	NA	NA	NA	NA	NA	NA	NA	2.1168	2.10957	2.11194	2.08996	2.10402	2.0773	NA	NA	NA	NA	NA	NA	2.48919	2.51238	2.56212	2.4794	2.50795	2.51493	2.97193	2.99601	3.05282	3.02229	3.03025	3.01248	NA	NA	NA	NA	2.11319	2.10197	NA	NA	2.52123	2.50076	3.00692	3.02168
ENSMUSG00000000168	Dlat	8.92024	8.94009	8.95076	8.9407	8.93798	9.16605	8.64642	8.83427	8.90019	8.80647	8.78555	8.8581	8.6714	8.67778	8.77516	8.66359	8.6977	8.76317	8.55211	8.55936	8.6405	8.57915	8.53333	8.34628	9.15862	9.29269	9.34465	9.33599	9.27885	9.36198	10.1396	10.0869	10.0325	10.0393	10.2115	10.0733	8.93703	9.01491	8.79363	8.8167	8.67459	8.71215	8.58399	8.48625	9.26532	9.32561	10.0863	10.108
ENSMUSG00000000171	Sdhd	6.15786	6.11429	6.15065	6.21132	6.13054	6.12058	5.6304	5.63066	5.62279	5.42782	5.29853	5.63252	5.77258	5.87767	5.80631	5.86912	5.7567	5.77945	5.68256	5.72278	5.7225	5.92169	5.84427	5.95185	6.13602	6.37658	6.41534	6.37927	6.2445	6.15887	7.25541	7.51571	7.31904	7.25644	7.29605	7.26933	6.14093	6.15415	5.62795	5.45295	5.82513	5.81071	5.70928	5.90594	6.30932	6.26088	7.36339	7.27394
ENSMUSG00000000184	Ccnd2	6.58464	6.58745	6.63796	6.52982	6.41775	6.64825	6.37217	6.2563	6.2686	6.29861	6.32055	6.29204	6.53359	6.44383	6.70574	6.70404	6.65016	6.52784	6.5942	6.37673	6.70271	6.65949	6.57515	6.51266	6.55103	6.743	6.81006	6.7072	6.86008	6.73478	7.69606	8.04599	7.7854	7.78903	7.84223	7.84043	6.60335	6.53194	6.29902	6.30373	6.48871	6.68665	6.55788	6.58243	6.70136	6.76735	7.84248	7.8239
ENSMUSG00000000194	Gpr107	7.29954	7.34704	7.29677	7.27668	7.28461	7.2747	7.2491	7.16521	7.11831	7.26146	7.16703	7.20485	6.91653	7.02477	7.0145	7.00067	6.97119	7.01549	6.94012	6.81865	6.91904	6.83806	6.81725	6.79791	7.42642	7.54131	7.52623	7.49773	7.43972	7.56128	8.31291	8.27844	8.2551	8.30212	8.27746	8.25561	7.31445	7.27866	7.17754	7.21111	6.97065	6.99545	6.8926	6.81774	7.49799	7.49958	8.28215	8.2784
ENSMUSG00000000197	Nalcn	9.43271	9.42787	9.4025	9.50608	9.43674	9.53176	9.1426	9.08803	9.25907	9.06595	9.19467	9.27045	9.04262	9.01296	9.06161	8.98504	9.03018	9.02073	9.01486	9.07215	9.01366	8.97096	8.9877	8.96898	9.63045	9.6637	9.72933	9.62366	9.57757	9.63769	10.2911	10.236	10.2748	10.1349	10.0145	10.1574	9.42103	9.49153	9.16323	9.17703	9.02779	9.02561	9.03355	8.97588	9.67449	9.61297	10.2673	10.1022
ENSMUSG00000000202	Btbd17	NA	NA	NA	NA	NA	NA	NA	NA	NA	NA	NA	NA	NA	NA	NA	NA	NA	NA	NA	NA	NA	NA	NA	NA	NA	NA	NA	NA	NA	NA	2.00458	1.984	2.03988	2.00701	2.03409	2.01873	NA	NA	NA	NA	NA	NA	NA	NA	NA	NA	2.00949	2.01994
ENSMUSG00000000216	Scnn1g	NA	NA	NA	NA	NA	NA	NA	NA	NA	NA	NA	NA	NA	NA	NA	NA	NA	NA	NA	NA	NA	NA	NA	NA	NA	NA	NA	NA	NA	NA	2.21606	2.16835	2.20669	2.17482	2.19538	2.21522	NA	NA	NA	NA	NA	NA	NA	NA	NA	NA	2.19703	2.19514
ENSMUSG00000000223	Drp2	7.51975	7.48533	7.45463	7.42593	7.53068	7.30318	7.29762	6.94651	7.0697	7.19266	7.31381	6.98087	7.11709	7.11232	7.13106	7.17926	7.11106	7.0521	6.60136	6.93817	6.74972	6.92659	6.95094	6.94106	7.34464	7.36747	7.42486	7.38258	7.34467	7.27447	8.31584	8.37316	8.12277	8.14516	8.28699	8.30445	7.48657	7.41993	7.10461	7.16245	7.1147	7.14046	6.76308	6.93953	7.37899	7.33391	8.27059	8.24553
ENSMUSG00000000247	Lhx2	5.47014	5.64977	5.55002	5.43508	5.60313	5.67779	5.64129	5.56204	5.48216	5.61981	5.6835	5.6638	5.32529	5.28204	5.23454	5.39522	5.23011	5.20204	5.5388	5.30223	5.37791	5.39349	5.36077	5.47377	5.8651	5.72842	5.70405	5.76767	5.73891	5.65693	6.61489	6.60583	6.59587	6.57054	6.56089	6.55283	5.55664	5.572	5.56183	5.6557	5.30366	5.28663	5.40632	5.40934	5.76586	5.72117	6.60553	6.56142
ENSMUSG00000000253	Gmpr	8.46317	8.45936	8.29248	8.56587	8.49291	8.27802	7.98931	8.10959	7.98674	7.80621	7.99	7.9165	8.1178	8.10311	7.98903	8.17205	7.99233	8.0192	8.03856	7.99574	7.9139	8.08629	8.06706	8.02517	8.32929	8.31389	8.53458	8.55198	8.45242	8.35045	9.06478	9.36667	9.33979	9.26763	9.20494	9.52776	8.405	8.4456	8.02855	7.90424	8.11046	8.05114	7.98273	8.0595	8.39259	8.45161	9.25708	9.33344
ENSMUSG00000000266	Mid2	5.64979	5.57694	5.66905	5.80339	5.79356	5.78707	5.8424	5.75333	5.94228	5.62254	5.97361	5.82446	5.41224	5.63343	5.52371	5.4954	5.44654	5.40476	5.46096	5.56308	5.48144	5.51816	5.49453	5.47735	6.18197	6.23123	6.19612	6.14751	6.15918	6.22173	6.71096	6.65798	6.77594	6.70901	6.67586	6.71267	5.63193	5.79468	5.846	5.80687	5.52284	5.48855	5.50183	5.49668	6.20311	6.17614	6.71496	6.69918
ENSMUSG00000000275	Trim25	NA	NA	NA	NA	NA	NA	NA	NA	NA	NA	NA	NA	NA	NA	NA	NA	NA	NA	NA	NA	NA	NA	NA	NA	NA	NA	NA	NA	NA	NA	2.0897	2.10052	2.10753	2.16774	2.16927	2.11662	NA	NA	NA	NA	NA	NA	NA	NA	NA	NA	2.09925	2.15121
ENSMUSG00000000276	Dgke	8.32777	8.40294	8.46785	8.36678	8.35714	8.41922	8.11561	8.17827	8.21219	8.17548	7.97565	8.31667	7.9242	7.94233	7.97946	7.9367	8.02151	7.92555	7.83978	8.03887	7.88581	7.91528	7.87244	7.92797	8.45046	8.52356	8.72971	8.57645	8.4777	8.60846	9.39481	9.39608	9.19876	9.13215	9.19691	9.26024	8.39952	8.38104	8.16869	8.15593	7.93326	7.97922	7.92148	7.90523	8.56791	8.5542	9.32989	9.19643
ENSMUSG00000000278	Scpep1	4.54165	4.4697	4.57033	4.51032	4.53771	4.56676	4.2828	4.35742	4.37359	4.42432	4.34405	4.40179	4.23976	4.21876	4.25844	4.33523	4.2194	4.33713	4.5956	4.60148	4.6753	4.60596	4.65124	4.65012	5.11929	5.02356	5.20157	5.06459	5.06782	4.9978	6.27621	5.92942	6.14585	6.06044	6.01347	6.02834	4.52723	4.53826	4.33794	4.39005	4.22926	4.27102	4.62412	4.63577	5.11481	5.0434	6.11716	6.03408
ENSMUSG00000000282	Mnt	5.07057	5.13835	5.05913	5.17769	5.144	5.07977	4.67341	4.60727	4.59325	4.68676	4.6153	4.66563	4.829	4.81411	4.89907	4.81564	4.92318	4.81147	5.01331	4.87612	4.92647	5.02869	4.98842	5.05224	4.80943	4.86938	4.72608	4.75067	4.91124	4.84432	5.96433	6.08322	6.06497	6.07403	6.09242	5.99302	5.08935	5.13382	4.62465	4.6559	4.82155	4.8793	4.93864	5.02311	4.80163	4.83541	6.03751	6.05316
ENSMUSG00000000290	Itgb2	NA	NA	NA	NA	NA	NA	NA	NA	NA	NA	NA	NA	NA	NA	NA	NA	NA	NA	NA	NA	NA	NA	NA	NA	NA	NA	NA	NA	NA	NA	2.30804	2.43043	2.33596	2.30806	2.3444	2.37418	NA	NA	NA	NA	NA	NA	NA	NA	NA	NA	2.35814	2.34221
ENSMUSG00000000295	Hddc2	5.36369	5.46608	5.27726	5.26258	5.38894	5.376	4.95238	4.99524	4.94298	4.95111	4.83804	4.88174	5.17013	5.14257	5.14678	5.07231	5.0875	5.21195	4.903	5.01738	5.07602	4.96991	5.0006	5.00658	5.17207	5.09283	5.39304	5.23991	5.30769	5.26011	6.40965	6.2875	6.27243	6.24681	6.25592	6.37025	5.36901	5.34251	4.96353	4.8903	5.15635	5.10219	4.9988	4.99236	5.21931	5.26924	6.32319	6.29099
ENSMUSG00000000296	Tpd52l1	6.64022	6.59615	6.69653	6.59795	6.6805	6.70986	6.09178	6.32539	6.35588	6.33752	6.27237	6.34374	6.54747	6.48331	6.42781	6.3711	6.44072	6.44169	6.53052	6.38207	6.60141	6.3727	6.44773	6.34654	7.00354	6.90409	6.87421	6.90593	7.04121	6.81137	7.69574	7.52642	7.61794	7.59309	7.58385	7.4587	6.6443	6.66277	6.25768	6.31788	6.51539	6.41321	6.50467	6.38899	6.92728	6.9195	7.61337	7.54521
ENSMUSG00000000301	Pemt	NA	NA	NA	NA	NA	NA	NA	NA	NA	NA	NA	NA	1.8127	1.82489	1.76709	1.78883	1.76899	1.78577	NA	NA	NA	NA	NA	NA	NA	NA	NA	NA	NA	NA	NA	NA	NA	NA	NA	NA	NA	NA	NA	NA	1.81879	1.77497	NA	NA	NA	NA	NA	NA
ENSMUSG00000000305	Cdh4	5.09664	5.16637	5.13688	5.21963	5.12324	5.19331	4.69722	4.94635	4.77474	4.68529	4.90383	4.7898	4.94467	4.95021	4.80138	4.83864	4.83567	4.89182	5.33584	5.05181	5.14893	5.0539	5.18649	5.27098	5.40356	5.51641	5.55047	5.44871	5.63373	5.26835	6.07797	6.17907	5.99758	5.93555	6.00947	5.96584	5.13329	5.17873	4.8061	4.79297	4.94744	4.82523	5.17886	5.17045	5.49015	5.45026	6.08488	5.97029
ENSMUSG00000000308	Ckmt1	10.1723	10.1441	10.1552	10.1993	10.147	10.2299	9.69973	9.85205	9.79238	9.67441	9.94949	9.94174	9.99204	9.87925	9.87303	10.0123	9.92904	9.8483	10.0719	9.91821	9.98985	10.033	9.87882	9.95418	10.3881	10.4346	10.3923	10.3446	10.365	10.3097	11.2296	11.2077	11.3017	11.035	11.0452	10.8647	10.1572	10.1921	9.78139	9.85521	9.93565	9.93814	9.99332	9.95532	10.405	10.3398	11.2464	10.9817
ENSMUSG00000000325	Arvcf	5.16112	5.0276	4.99677	4.93619	4.90301	4.92098	4.37057	4.28788	4.21996	4.40511	4.16944	4.30657	4.6784	4.64001	4.63885	4.75081	4.61626	4.65488	4.46683	4.42966	4.37543	4.46761	4.49479	4.55736	4.61534	4.52738	4.53079	4.6191	4.58586	4.58762	5.71697	5.72911	5.77716	5.68804	5.82592	5.72453	5.06183	4.92006	4.2928	4.29371	4.65921	4.66864	4.42397	4.50659	4.55784	4.59753	5.74108	5.74616
ENSMUSG00000000326	Comt	7.95978	7.70579	7.74595	7.69847	7.71782	7.65469	7.18508	7.24383	7.1989	7.06545	7.26925	7.36567	7.70598	7.4824	7.44688	7.49404	7.40474	7.54828	7.42749	7.37126	7.62723	7.64327	7.50502	7.45578	7.73303	7.75461	7.63655	7.61806	7.86539	7.59039	8.63963	8.83131	8.66409	8.72552	8.73942	8.84509	7.80384	7.69033	7.20927	7.23346	7.59419	7.44855	7.47533	7.53469	7.70806	7.69128	8.71167	8.77001
ENSMUSG00000000339	Rtca	7.61449	7.59132	7.74695	7.62799	7.65739	7.79494	7.58626	7.57641	7.51418	7.50506	7.55465	7.65388	7.34766	7.3923	7.24403	7.293	7.33416	7.34745	7.43691	7.33854	7.31657	7.27648	7.31837	7.15981	8.01564	8.00474	8.11144	7.90052	7.9182	7.95793	8.83977	8.64549	8.87654	8.9863	8.77996	8.88388	7.65092	7.69344	7.55895	7.5712	7.36998	7.2904	7.36401	7.25155	8.04394	7.92555	8.78727	8.88338
ENSMUSG00000000340	Dbt	5.30959	5.43171	5.38828	5.30423	5.26543	5.3121	5.26799	5.07457	5.03126	5.10909	5.029	5.03892	5.01222	5.04264	5.06113	5.03147	5.09428	5.02155	4.80261	4.90288	4.75192	4.76767	4.80876	4.85277	5.53213	5.61161	5.71452	5.71865	5.70392	5.7219	6.39949	6.5103	6.47233	6.45804	6.46298	6.41081	5.37652	5.29392	5.12461	5.059	5.02743	5.06229	4.81914	4.80973	5.61942	5.71482	6.46071	6.44395
ENSMUSG00000000346	Dazap2	6.21916	6.27874	6.29371	6.30013	6.21911	6.23287	5.95426	5.89143	5.89074	5.95885	5.99702	6.0928	5.85001	5.77275	5.82893	5.84995	5.78725	5.84114	5.9374	5.78297	5.87835	5.78442	5.79805	5.83244	6.31232	6.22781	6.3196	6.36262	6.41168	6.24589	7.23671	7.54354	7.53701	7.39302	7.52171	7.44089	6.26387	6.2507	5.91214	6.01622	5.81138	5.82204	5.86624	5.80497	6.28658	6.34006	7.43909	7.45187
ENSMUSG00000000355	Mcts1	8.86581	8.95362	9.08301	8.92528	8.94123	9.1032	8.76522	8.80109	9.01299	8.97119	9.03832	8.92005	8.29142	8.53168	8.62258	8.50396	8.57464	8.42483	8.20212	8.48115	8.27094	8.20282	8.32892	8.18354	8.99201	9.22549	9.24025	9.21694	9.06085	9.40377	9.70935	9.79965	9.80659	9.8911	10.0205	9.8222	8.96748	8.9899	8.85977	8.97652	8.41155	8.56706	8.31807	8.23843	9.15258	9.22719	9.77186	9.91127
ENSMUSG00000000365	Rnf17	2.41072	2.44764	2.4611	2.41515	2.47719	2.42505	2.35493	2.27358	2.31643	2.27485	2.28371	2.26402	2.0519	2.03561	2.07764	2.10715	2.0536	2.07337	2.06307	2.09984	2.12022	2.08728	2.11658	2.06432	2.66666	2.7301	2.70154	2.6855	2.74366	2.81557	3.2173	3.21576	3.21281	3.18686	3.22472	3.22004	2.43982	2.43913	2.31498	2.27419	2.04376	2.07946	2.09438	2.08939	2.69943	2.74824	3.21529	3.21054
ENSMUSG00000000374	Trappc10	7.68203	7.80531	7.68524	7.75538	7.81289	7.55932	7.48682	7.41168	7.3868	7.30116	7.3438	7.1781	7.46883	7.50488	7.54384	7.44174	7.38853	7.46171	7.37301	7.33935	7.31658	7.48372	7.41093	7.49213	7.7859	7.8206	7.76159	7.69916	7.86405	7.81413	8.67991	8.61938	8.72323	8.61649	8.70891	8.73388	7.72419	7.7092	7.42843	7.27435	7.48685	7.45804	7.34298	7.46226	7.78936	7.79245	8.67418	8.68643
ENSMUSG00000000378	Ccm2	5.27101	5.21088	5.11488	5.26955	5.15245	5.14466	4.74283	4.69796	4.56384	4.60596	4.67663	4.61994	4.89043	4.85487	4.78658	4.83832	4.86814	4.91565	4.74907	4.63294	4.71556	4.60704	4.66563	4.70204	5.22445	5.13969	5.22667	5.35848	5.24073	5.13046	6.02049	6.02241	5.91321	5.91544	5.91732	5.9783	5.19892	5.18888	4.66821	4.63418	4.87265	4.83101	4.69919	4.65823	5.19694	5.24322	5.98537	5.93702
ENSMUSG00000000384	Tbrg4	5.74948	5.66947	5.52445	5.61728	5.72939	5.56487	5.22349	5.25822	5.19039	5.18734	4.95317	5.31356	5.52921	5.51039	5.48092	5.4165	5.55157	5.5667	5.61448	5.45735	5.55698	5.62128	5.53074	5.49416	5.74681	5.67338	5.8102	5.83357	5.71143	5.70757	6.50672	6.51997	6.68328	6.47243	6.54541	6.66788	5.6478	5.63718	5.22403	5.15135	5.5198	5.483	5.54294	5.54872	5.74346	5.75085	6.56999	6.56191
ENSMUSG00000000399	Ndufa9	8.90054	8.8967	8.9105	8.94904	8.92716	8.95408	8.5415	8.61492	8.59607	8.52328	8.43494	8.56823	8.7205	8.62096	8.63974	8.71638	8.73891	8.69594	8.79397	8.70193	8.72432	8.91802	8.83384	8.6612	9.21809	9.12629	9.29152	9.29676	9.23665	9.17283	10.0655	10.0287	10.0532	10.0155	9.97716	9.98534	8.90258	8.94343	8.58416	8.50882	8.67073	8.69834	8.74007	8.80435	9.21196	9.23541	10.0491	9.99265
ENSMUSG00000000402	Egfl6	4.39864	4.34287	4.49919	4.38551	4.45626	4.35182	3.92271	4.01682	3.98493	4.21075	4.03238	3.9456	3.80322	3.84963	3.67028	3.7151	3.6825	3.69156	3.24858	3.22403	3.30849	3.24241	3.18374	3.22963	3.7591	3.73595	3.66955	3.73679	3.74181	3.69985	4.80683	4.91014	4.78071	4.89785	4.76728	4.80961	4.41357	4.39786	3.97482	4.06291	3.82643	3.6893	3.26037	3.21859	3.72153	3.72615	4.83256	4.82491
ENSMUSG00000000416	Cttnbp2	8.73038	8.79727	8.7805	8.86954	8.82587	8.74318	8.66018	8.5977	8.6293	8.81798	8.44763	8.30876	8.64527	8.71035	8.76246	8.73638	8.72984	8.5994	8.37841	8.59132	8.23042	8.5424	8.54879	8.39987	9.04245	9.24708	9.06667	9.25577	9.20068	9.22251	9.94465	10.0678	9.97576	10.1977	10.2264	10.0069	8.76939	8.81286	8.62906	8.52479	8.67781	8.74289	8.40005	8.49702	9.11874	9.22632	9.99608	10.1437
ENSMUSG00000000420	Galnt1	6.89029	6.67594	7.02598	6.8935	6.78877	6.89912	6.50179	6.47409	6.71619	6.45574	6.6766	6.69803	6.19158	6.14938	6.24404	6.17143	6.16831	6.15978	6.177	6.19888	6.259	6.25277	6.11795	6.19588	6.90064	6.61632	6.89987	6.85885	6.82289	6.93393	7.58805	7.33619	7.55913	7.46962	7.36819	7.46362	6.86407	6.86046	6.56403	6.61012	6.17048	6.19459	6.21163	6.18887	6.80561	6.87189	7.49446	7.43381
ENSMUSG00000000439	Mkrn2	5.54888	5.74363	5.66401	5.71024	5.72337	5.75945	5.59656	5.63115	5.55672	5.49577	5.80482	5.54481	5.99813	5.79785	5.74613	5.76668	5.76253	5.84644	5.63976	5.57071	5.72567	5.61379	5.72389	5.69916	5.8408	5.78648	5.85252	5.67237	5.83506	5.78368	6.81266	6.77082	6.81079	6.80786	6.77664	6.78467	5.65217	5.73102	5.59481	5.61513	5.89799	5.75845	5.64538	5.67895	5.8266	5.7637	6.79809	6.78972
ENSMUSG00000000440	Pparg	NA	NA	NA	NA	NA	NA	NA	NA	NA	NA	NA	NA	NA	NA	NA	NA	NA	NA	NA	NA	NA	NA	NA	NA	1.75856	1.72014	1.75793	1.70981	1.7252	1.75049	2.63727	2.57106	2.60351	2.56017	2.61012	2.59192	NA	NA	NA	NA	NA	NA	NA	NA	1.74555	1.7285	2.60395	2.5874
ENSMUSG00000000441	Raf1	6.59669	6.63442	6.67876	6.59629	6.69503	6.56359	5.97467	5.9561	6.05581	5.96322	5.97852	6.0413	6.19585	6.14451	6.13001	6.14195	6.12928	6.12895	6.15604	6.24385	6.29285	6.23607	6.32534	6.26202	6.49188	6.45908	6.47055	6.53913	6.30762	6.35999	7.37445	7.4055	7.35334	7.32671	7.41451	7.54319	6.63662	6.6183	5.99553	5.99435	6.17018	6.13375	6.23092	6.27448	6.47383	6.40225	7.37777	7.42814
ENSMUSG00000000489	Pdgfb	4.75119	4.78208	4.72882	4.71449	4.736	4.65869	4.3365	4.24297	4.17046	4.24486	4.17695	4.26147	4.65423	4.60466	4.59375	4.63226	4.62287	4.619	4.72471	4.64435	4.61804	4.74186	4.6776	4.74955	4.4731	4.48436	4.53615	4.5758	4.53437	4.56741	5.16766	5.31506	5.27234	5.21491	5.38775	5.24099	4.75403	4.70306	4.24998	4.22776	4.62944	4.61629	4.66236	4.723	4.49787	4.55919	5.25169	5.28122
ENSMUSG00000000531	Grasp	7.42852	7.37651	7.27835	7.42366	7.55271	7.36786	6.94234	7.03665	6.81101	7.0728	6.67655	6.7801	7.2425	7.23626	7.07254	7.12674	7.0545	7.2719	7.31919	7.1105	7.37319	7.32666	7.26899	7.29011	7.43805	7.42628	7.46374	7.479	7.44194	7.22616	8.46161	8.5472	8.44805	8.70715	8.6757	8.62004	7.36113	7.44807	6.93	6.84315	7.23938	7.08459	7.26763	7.29525	7.44269	7.38237	8.48562	8.66763
ENSMUSG00000000532	Acvr1b	8.41955	8.44544	8.53215	8.4313	8.47701	8.47832	8.27477	8.06068	7.98987	8.06635	8.09399	8.10571	8.00005	8.0113	8.01117	8.08955	8.08768	8.05826	8.05118	8.01557	7.89479	8.0353	7.93366	7.97373	8.37747	8.30395	8.40524	8.26553	8.31099	8.38017	9.27543	9.38804	9.23295	9.17824	9.1621	9.26709	8.46571	8.46221	8.10844	8.08869	8.00567	8.0628	7.98718	7.9809	8.36222	8.3189	9.29881	9.20248
ENSMUSG00000000538	Tom1l2	9.10382	9.07019	9.06488	9.0867	9.09609	9.02094	8.72504	8.69098	8.47101	8.57997	8.60896	8.56708	9.00238	8.73592	8.72112	8.71914	8.77544	8.74965	8.85927	8.71836	8.79891	8.90965	8.83139	8.86191	9.16071	9.0924	9.08463	8.97352	9.04592	9.0348	10.1381	9.95612	10.0206	10.0148	9.88639	9.94093	9.07963	9.06791	8.62901	8.58533	8.86915	8.73857	8.79218	8.86765	9.11258	9.01808	10.0383	9.94736
ENSMUSG00000000552	Zfp385a	5.24341	5.25447	5.18112	5.3186	5.17108	5.27309	4.92307	4.84366	4.80425	4.92403	4.98323	5.04123	5.11181	4.91449	4.92878	5.01495	5.02709	4.99178	4.92669	4.95643	4.81331	4.9299	4.77508	4.9418	5.14163	4.99699	5.10441	5.04464	5.16746	5.14522	5.91354	5.92082	6.13814	5.81596	5.7945	5.82943	5.22633	5.25426	4.85699	4.98283	5.01315	4.99027	4.89881	4.88226	5.08101	5.11911	5.99083	5.8133
ENSMUSG00000000560	Gabra2	9.12068	9.31149	9.32807	9.33271	9.40576	9.378	9.19457	9.33583	9.40617	9.68058	9.34022	9.24727	8.93223	9.04193	9.19399	9.13075	9.09428	8.92612	8.88113	8.92386	8.81362	8.60623	8.73106	8.73193	9.62627	9.68026	9.7233	9.70256	9.5915	9.69852	10.4897	10.5077	10.2931	10.3318	10.2787	10.1315	9.25341	9.37216	9.31219	9.42269	8.98708	9.13967	8.87287	8.68974	9.67661	9.66419	10.4302	10.2473
ENSMUSG00000000563	Atp5pb	9.34696	9.31468	9.38163	9.39657	9.23087	9.25658	8.86486	8.94969	9.01611	8.92957	9.07707	9.10471	9.01752	8.95134	8.95683	8.84576	8.84186	8.93028	8.89998	8.81438	8.83341	8.90022	8.87494	8.73561	9.23822	9.28827	9.24679	9.14728	9.2329	9.34481	10.1345	10.2522	10.285	10.1195	10.2093	10.2833	9.34776	9.29468	8.94355	9.03712	8.98443	8.88148	8.84925	8.83692	9.25776	9.24166	10.2239	10.204
ENSMUSG00000000567	Sox9	1.99813	2.03365	1.98428	1.98249	1.97984	2.02097	2.17791	2.15657	2.1166	2.16726	2.14918	2.17137	NA	NA	NA	NA	NA	NA	2.09353	2.07443	2.09468	2.06059	2.05224	2.08188	2.39954	2.40463	2.43379	2.38658	2.37841	2.39328	3.71506	3.69498	3.6869	3.75336	3.74267	3.7217	2.00535	1.99443	2.15036	2.1626	NA	NA	2.08755	2.0649	2.41265	2.38609	3.69898	3.73924
ENSMUSG00000000568	Hnrnpd	9.42125	9.41931	9.50061	9.43928	9.43841	9.62549	9.11173	9.37021	9.38373	9.22415	9.29037	9.33008	9.07545	9.10983	9.07833	8.88833	8.98857	9.195	9.15213	9.13078	9.01899	8.95431	9.01631	9.01414	9.64687	9.72201	9.59185	9.5497	9.46876	9.70184	10.3233	9.96565	10.2493	10.3522	10.2308	10.1933	9.44706	9.50106	9.28856	9.28153	9.09264	8.98508	9.10064	8.99492	9.65357	9.57343	10.1794	10.2588
ENSMUSG00000000581	C1d	7.65791	7.70199	7.70651	7.73488	7.68097	7.84233	7.47744	7.6019	7.56502	7.24359	7.50511	7.44938	7.55262	7.5656	7.55835	7.42165	7.39806	7.38972	7.29065	7.47046	7.3807	7.25702	7.27506	7.30602	7.73441	7.98607	7.69685	7.78007	7.71344	7.89804	8.41881	8.42096	8.41458	8.65111	8.55536	8.42645	7.6888	7.75272	7.54812	7.39936	7.55911	7.45935	7.3806	7.27937	7.80578	7.79719	8.41812	8.54431
ENSMUSG00000000594	Gm2a	5.96998	5.92758	6.00582	6.05125	5.99037	5.95579	5.56765	5.74083	5.53188	5.71889	5.59751	5.68954	5.7404	5.68967	5.59584	5.56301	5.68805	5.74185	5.7408	5.52483	5.77327	5.59617	5.55753	5.76774	5.73042	5.52607	5.60492	5.67229	5.6174	5.5815	6.4145	6.73229	6.55722	6.43098	6.63284	6.59413	5.96779	5.99914	5.61345	5.66865	5.71504	5.61563	5.67964	5.64048	5.62047	5.62373	6.568	6.55265
ENSMUSG00000000600	Krit1	7.37094	7.56433	7.57655	7.51805	7.59476	7.59109	7.36592	7.60223	7.68769	7.87855	7.74569	7.37046	7.00891	7.18792	7.2088	7.14456	7.11563	7.04857	6.67854	7.00064	6.8322	6.80042	6.79648	6.74051	7.90115	7.92661	7.94028	7.84219	7.99036	8.02123	8.88493	8.40185	8.62338	8.60828	8.77198	8.64688	7.50394	7.56797	7.55195	7.6649	7.09842	7.15633	6.83712	6.77914	7.92268	7.95126	8.63672	8.67571
ENSMUSG00000000605	Clcn4	9.48411	9.35116	9.25848	9.44081	9.38005	9.37693	9.06069	9.08552	9.02761	9.05113	9.11807	9.17068	8.88929	9.01516	8.87648	8.94487	8.91958	8.90351	8.94466	8.92025	9.0208	8.98271	8.97513	8.94612	9.37415	9.25071	9.38805	9.42386	9.35736	9.33791	10.1224	10.2584	10.1324	10.1747	10.1702	10.2273	9.36458	9.39926	9.05794	9.11329	8.95223	8.91365	8.9619	8.96798	9.33764	9.37304	10.1711	10.1907
ENSMUSG00000000627	Sema4f	6.07085	6.01274	5.83107	5.97807	6.03312	5.97332	5.8894	5.70247	5.76412	5.54183	5.76859	5.81171	5.70089	5.732	5.74319	5.67565	5.76304	5.79654	5.93782	5.81242	5.92054	5.82876	5.91466	5.91438	6.32375	6.39147	6.173	6.22463	6.28158	6.13064	7.12305	7.003	6.99264	6.93931	7.04736	7.00145	5.97155	5.99483	5.78533	5.70738	5.71644	5.72729	5.89026	5.88593	6.29607	6.21228	7.03956	6.99604
ENSMUSG00000000628	Hk2	2.16362	2.14142	2.1288	2.1188	2.10565	2.1288	NA	NA	NA	NA	NA	NA	NA	NA	NA	NA	NA	NA	NA	NA	NA	NA	NA	NA	2.14673	2.20732	2.15755	2.19066	2.16858	2.2214	3.3048	3.33075	3.34428	3.37002	3.40246	3.36068	2.14461	2.11775	NA	NA	NA	NA	NA	NA	2.17053	2.19355	3.32661	3.37772
ENSMUSG00000000631	Myo18a	8.10385	8.0747	7.85163	7.95472	7.9729	7.82306	7.4566	7.5666	7.42843	7.63926	7.28522	7.33492	7.68864	7.61373	7.49305	7.67156	7.66509	7.62724	7.6956	7.73615	7.48399	7.70022	7.8312	7.76667	7.7542	7.98378	7.88704	7.76471	7.63785	7.79883	8.85057	8.81038	8.86934	8.75584	9.04859	8.94541	8.01006	7.91689	7.48388	7.4198	7.65119	7.6099	7.63858	7.76603	7.87501	7.7338	8.84343	8.91661
ENSMUSG00000000632	Sez6	10.7725	10.6234	10.5916	10.7715	10.7675	10.573	10.469	10.4131	10.086	10.4368	10.4868	10.2695	10.2518	10.4043	10.13	10.2845	10.1094	10.2665	10.2308	10.0611	10.2488	10.1474	10.2086	10.1595	10.5358	10.4554	10.8621	10.8362	10.804	10.4315	11.4911	11.5936	11.3177	11.2689	11.3071	11.3905	10.6625	10.704	10.3227	10.3977	10.3281	10.1746	10.1803	10.1718	10.6177	10.6905	11.4675	11.3222
ENSMUSG00000000708	Kat2b	2.30766	2.2659	2.24247	2.3103	2.29555	2.26371	2.15136	2.27035	2.202	2.17633	2.15574	2.19704	NA	NA	NA	NA	NA	NA	NA	NA	NA	NA	NA	NA	1.7848	1.74002	1.75911	1.80501	1.74751	1.79528	3.0991	3.15927	3.09756	3.05251	3.12967	3.13382	2.27201	2.28985	2.20791	2.17637	NA	NA	NA	NA	1.76131	1.7826	3.11864	3.10533
ENSMUSG00000000711	Rab5b	6.12076	6.25253	6.22386	6.2218	6.23482	6.25465	6.08306	6.06721	6.21672	6.21372	5.99474	6.21793	5.71929	5.88555	5.83855	5.8419	5.73484	5.70706	5.50414	5.73914	5.57038	5.66116	5.83094	5.67008	6.44995	6.35624	6.60483	6.71168	6.4225	6.52719	7.08062	7.30867	7.22043	7.20331	7.17187	7.28239	6.19905	6.23709	6.12233	6.14213	5.80242	5.8051	5.60455	5.72073	6.47034	6.55379	7.20324	7.21919
ENSMUSG00000000732	Icosl	2.88192	2.93446	2.91982	2.94837	2.91975	2.98439	2.50531	2.45146	2.43321	2.45439	2.4085	2.46673	2.87344	2.92169	2.9547	2.88981	3.00064	2.91905	2.5813	2.5876	2.61869	2.63321	2.66865	2.59297	3.45023	3.47734	3.5862	3.43869	3.56536	3.47875	4.95876	5.10433	5.02269	5.02898	5.03462	5.17101	2.91206	2.95084	2.46333	2.44321	2.89756	2.94839	2.59586	2.63161	3.50459	3.49427	5.02859	5.0782
ENSMUSG00000000738	Spg7	6.68833	6.61955	6.48351	6.614	6.64669	6.43056	6.15117	6.02213	6.00229	5.99892	5.91088	6.03215	6.30469	6.34884	6.2253	6.19527	6.26729	6.24078	6.03753	6.1136	6.12471	6.2023	6.03289	6.06405	6.25044	6.21429	6.40437	6.30387	6.22131	6.22682	7.27823	7.3071	7.30521	7.315	7.10677	7.2242	6.59713	6.56375	6.05853	5.98065	6.32676	6.22929	6.09195	6.09974	6.2897	6.25067	7.29685	7.21532
ENSMUSG00000000739	Sult5a1	2.51255	2.50356	2.53812	2.52006	2.53808	2.50082	NA	NA	NA	NA	NA	NA	NA	NA	NA	NA	NA	NA	NA	NA	NA	NA	NA	NA	2.15904	2.17045	2.19449	2.17855	2.21575	2.19389	3.41488	3.50104	3.46675	3.50114	3.55283	3.52	2.51808	2.51965	NA	NA	NA	NA	NA	NA	2.17466	2.19606	3.46089	3.52465
ENSMUSG00000000740	Rpl13	2.67077	2.54922	2.52518	2.56545	2.51098	2.5161	NA	NA	NA	NA	NA	NA	2.47823	2.466	2.45961	2.45586	2.46897	2.5041	1.67616	1.6841	1.70485	1.66657	1.71244	1.72138	1.79817	1.75626	1.73698	1.73253	1.78063	1.75808	2.87396	2.83482	2.81089	2.8769	2.88452	2.83956	2.58173	2.53084	NA	NA	2.47211	2.46148	1.68837	1.70013	1.7638	1.75708	2.83989	2.86699
ENSMUSG00000000743	Chmp1a	7.10843	7.04897	6.88506	6.97653	6.98026	6.86307	6.65484	6.70329	6.49338	6.51747	6.70672	6.56822	6.58355	6.54821	6.54905	6.5718	6.4644	6.61549	6.64322	6.60323	6.6176	6.55552	6.66187	6.65363	6.81258	6.75853	6.83434	6.87271	6.90534	6.75916	7.83579	7.81053	7.93622	7.81875	7.95955	7.83605	7.01416	6.93996	6.61717	6.59747	6.56588	6.52842	6.62135	6.62367	6.80181	6.84574	7.86085	7.87145
ENSMUSG00000000751	Rpa1	7.89388	7.98769	8.05174	8.02422	8.1345	7.96821	7.9386	7.94492	7.77024	7.73349	7.81564	7.80528	7.89007	7.73722	7.86834	7.74573	7.87065	7.96639	7.90193	7.75684	7.91809	7.90256	7.84293	7.86527	8.30554	8.39422	8.15008	8.24887	8.32444	8.14692	9.27271	9.12374	9.23262	9.20129	9.09929	9.15933	7.97777	8.04231	7.88459	7.7848	7.81364	7.82824	7.85895	7.87025	8.28328	8.24008	9.20969	9.1533
ENSMUSG00000000753	Serpinf1	2.55503	2.56047	2.53961	2.49857	2.56999	2.49868	2.22864	2.24203	2.24441	2.20935	2.18889	2.24317	1.69888	1.74856	1.73175	1.72169	1.68606	1.74753	3.15022	3.09982	3.21863	3.1369	3.19433	3.09958	3.24426	3.23258	3.31722	3.35074	3.36811	3.26226	4.22211	4.2878	4.32452	4.37178	4.31204	4.32836	2.5517	2.52241	2.23836	2.2138	1.72372	1.71317	3.15622	3.1436	3.26469	3.32704	4.27814	4.33739
ENSMUSG00000000759	Tubgcp3	6.35066	6.24724	6.36693	6.49104	6.46604	6.3142	6.01749	5.96747	6.01995	5.97606	6.13341	5.81419	6.15388	6.20129	6.21174	6.21572	6.26787	6.24345	5.80471	5.89132	5.92183	5.89556	5.86783	6.01293	6.28696	6.51359	6.2176	6.27938	6.17919	6.25839	7.05549	7.14287	7.2294	7.27984	7.23298	7.32409	6.32161	6.42376	6.00164	5.97455	6.17758	6.23178	5.87262	5.92544	6.33938	6.23899	7.14259	7.27897
ENSMUSG00000000766	Oprm1	1.68058	1.71283	1.67428	1.72916	1.67441	1.7293	NA	NA	NA	NA	NA	NA	NA	NA	NA	NA	NA	NA	NA	NA	NA	NA	NA	NA	1.99804	2.00019	1.97634	1.95082	1.96506	2.00895	2.20742	2.16495	2.2269	2.13742	2.15961	2.15433	1.68923	1.71096	NA	NA	NA	NA	NA	NA	1.99153	1.97494	2.19976	2.15045
ENSMUSG00000000776	Polr3d	5.21401	5.18382	5.14764	5.11683	5.22565	5.12494	4.91602	4.90375	4.91897	4.85013	4.95077	4.9268	5.30866	5.04763	5.21355	5.22388	5.20126	5.2105	4.75619	4.80968	4.84854	4.82404	4.75882	4.82646	5.40526	5.3364	5.38195	5.35799	5.28043	5.30243	6.16092	6.03719	6.18659	6.21521	6.18438	6.11624	5.18182	5.15581	4.91291	4.90924	5.17815	5.2129	4.8048	4.8031	5.37454	5.31362	6.12823	6.17194
ENSMUSG00000000787	Ddx3x	10.067	9.98617	10.0598	10.0315	9.97751	10.2809	9.51888	9.77184	10.035	9.43666	9.90602	9.81134	9.87758	9.64676	9.84819	9.8008	9.86537	9.66692	9.62085	9.86808	9.81773	9.77887	9.90639	9.72347	10.3581	10.4153	10.2362	10.1621	10.2619	10.4355	10.9146	10.9708	10.9385	10.9682	11.0615	10.8929	10.0376	10.0966	9.77525	9.71801	9.76217	9.83812	9.76889	9.80291	10.3365	10.2865	10.9413	10.9742
ENSMUSG00000000792	Slc5a5	3.70099	3.6889	3.77057	3.7451	3.71175	3.68285	3.45395	3.43654	3.43816	3.4973	3.5537	3.44349	3.49185	3.52538	3.53354	3.53101	3.6117	3.56075	3.89243	3.87281	3.83526	3.79728	3.89966	3.87548	3.85274	3.84366	3.82713	3.87535	3.79462	3.77133	5.11749	5.16243	5.31431	5.15685	5.10601	5.1708	3.72015	3.71323	3.44288	3.49816	3.50862	3.55875	3.86684	3.85747	3.84117	3.81377	5.19808	5.14455
ENSMUSG00000000794	Kcnn3	3.91032	3.94201	3.85699	3.85527	3.91604	3.96648	3.94195	3.7665	3.84897	3.79216	3.81664	3.90135	3.96543	4.01884	3.92771	4.00079	4.12346	4.06284	3.8558	3.8725	3.99414	3.79424	3.85842	3.92059	3.69606	3.6407	3.74014	3.66098	3.67916	3.71545	5.16241	5.13759	5.19792	5.16372	5.13683	5.14304	3.90311	3.91259	3.85247	3.83672	3.99213	4.01732	3.90748	3.85775	3.6923	3.6852	5.16598	5.14786
ENSMUSG00000000804	Usp32	8.54106	8.55771	8.61064	8.50107	8.5637	8.59959	8.45866	8.2383	8.46847	8.3966	8.33304	8.21893	8.18419	8.3577	8.27745	8.27796	8.35116	8.31639	7.95413	8.14897	8.04476	8.06259	8.12406	7.97962	8.70643	8.71925	8.79237	8.76882	8.80508	8.79114	9.54492	9.54507	9.56515	9.53854	9.60409	9.55591	8.5698	8.55479	8.38848	8.31619	8.27094	8.30219	8.04929	8.05543	8.73935	8.78835	9.55171	9.56618
ENSMUSG00000000805	Car4	6.26993	6.11266	6.30822	6.16987	6.07194	6.15427	5.8686	5.92356	5.92088	5.64395	5.71738	5.8657	5.75507	5.76508	5.81119	5.82006	5.80158	5.77679	6.26443	5.9799	6.23302	6.21369	6.1521	6.11329	6.34973	6.36705	6.28563	6.31277	6.44728	6.33183	7.40128	7.57622	7.49431	7.42898	7.30468	7.43819	6.23027	6.13203	5.90435	5.74235	5.76007	5.81094	6.15911	6.1597	6.33414	6.36396	7.4906	7.39062
ENSMUSG00000000811	Txnrd3	2.91749	2.95193	2.93391	2.90944	2.91788	2.9471	2.18674	2.21112	2.24835	2.17138	2.20528	2.25922	2.87066	2.82494	2.79318	2.76611	2.77079	2.76664	2.63661	2.59412	2.63378	2.59447	2.56756	2.62788	2.79804	2.80694	2.7906	2.79064	2.8851	2.83457	4.1238	4.05863	4.15894	4.24955	4.23384	4.15489	2.93444	2.92481	2.2154	2.21196	2.8478	2.77669	2.6215	2.59664	2.79853	2.83677	4.11379	4.21276
ENSMUSG00000000823	Zfp512b	6.44773	6.47496	6.36131	6.38711	6.39293	6.46811	6.27093	6.28116	6.16917	5.9621	6.25218	6.13665	6.26722	6.27731	6.28246	6.1998	6.21746	6.28145	6.24091	5.99012	6.25406	6.24303	6.21383	6.10969	6.35398	6.31779	6.43716	6.41924	6.48527	6.42197	7.3743	7.46062	7.33713	7.17124	7.26684	7.12125	6.428	6.41605	6.24042	6.11698	6.27227	6.23324	6.1617	6.18885	6.36964	6.44216	7.39068	7.18644
ENSMUSG00000000826	Dnajc5	9.35993	9.20355	9.22799	9.1548	9.23943	9.28978	8.77932	8.94376	8.78562	8.91489	8.98622	8.85352	9.08306	8.90652	8.97153	8.87375	8.84955	9.181	9.20992	8.82248	9.05445	9.02208	8.91926	9.17963	9.4929	9.47275	9.26028	9.328	9.43731	9.31377	10.3342	10.1081	10.2034	10.2508	10.0423	10.1151	9.26382	9.228	8.83623	8.91821	8.99479	8.89827	9.02895	9.04032	9.40864	9.35969	10.2152	10.136
ENSMUSG00000000827	Tpd52l2	7.05185	6.9709	7.06346	7.0215	6.97837	6.95375	6.74493	6.74204	6.56612	6.68458	6.81718	6.65594	6.74757	6.64015	6.72996	6.64233	6.62102	6.81295	6.66812	6.45861	6.59981	6.62336	6.65654	6.59828	7.05718	7.08093	6.91725	6.95853	6.90183	6.89502	7.99604	7.97184	8.08321	8.02849	7.85758	8.02988	7.02873	6.98454	6.68436	6.71924	6.69386	6.66444	6.57551	6.62606	7.01845	6.91846	8.01703	7.97198
ENSMUSG00000000838	Fmr1	8.30329	8.31811	8.47815	8.38309	8.36275	8.46722	8.27838	8.3368	8.43987	8.31975	8.14873	8.30431	8.07383	8.10574	8.18814	8.06128	8.2257	8.06136	7.86892	8.10431	7.89366	7.86708	8.08193	7.84582	8.57545	8.63248	8.73785	8.61867	8.64545	8.75004	9.3967	9.35318	9.2757	9.35299	9.31798	9.35369	8.36652	8.40435	8.35168	8.2576	8.08978	8.15837	7.95563	7.93161	8.64859	8.67139	9.34186	9.34156
ENSMUSG00000000861	Bcl11a	9.31725	9.28604	9.28927	9.30777	9.37554	9.2945	8.91201	8.98501	8.94908	8.87334	9.12228	8.9838	8.78007	8.92584	8.86113	8.97163	8.77592	8.96422	8.92637	8.88146	8.75253	8.84066	8.76643	8.88783	9.4788	9.31577	9.31188	9.44178	9.19015	9.25917	10.1572	10.143	10.0162	9.86999	9.90927	9.93613	9.29752	9.32594	8.9487	8.99314	8.85296	8.86956	8.85345	8.83164	9.36881	9.29703	10.1055	9.90513
ENSMUSG00000000876	Pxmp4	3.57318	3.56516	3.5766	3.66369	3.57717	3.58673	2.8058	2.71586	2.72017	2.6548	2.66171	2.7253	3.34265	3.33752	3.31395	3.35895	3.33518	3.34455	3.26162	3.26517	3.25521	3.32676	3.28916	3.30762	2.74077	2.79311	2.77264	2.78064	2.77205	2.79554	4.10403	4.14082	4.13641	4.09443	4.15662	4.07784	3.57164	3.60919	2.74728	2.6806	3.34008	3.33603	3.26067	3.30785	2.76884	2.78274	4.12709	4.10963
ENSMUSG00000000881	Dlg3	9.74359	9.53567	9.63496	9.51273	9.50869	9.40195	9.21307	9.22431	9.14419	9.24433	9.24986	9.12874	9.2099	9.22559	9.09657	9.04153	9.16313	9.30177	9.29372	9.0781	9.35331	9.29419	9.11829	9.15669	9.5941	9.49856	9.55029	9.60114	9.67466	9.41031	10.5173	10.5514	10.3573	10.468	10.5047	10.538	9.63808	9.47446	9.19386	9.20764	9.21774	9.10041	9.24171	9.18972	9.54765	9.56204	10.4753	10.5035
ENSMUSG00000000884	Gnb1l	NA	NA	NA	NA	NA	NA	NA	NA	NA	NA	NA	NA	1.73654	1.75478	1.78924	1.7504	1.7963	1.73641	NA	NA	NA	NA	NA	NA	2.00304	2.00516	1.96896	1.98569	1.99141	1.97209	2.77988	2.81798	2.81161	2.80527	2.80727	2.79037	NA	NA	NA	NA	1.74566	1.77865	NA	NA	1.99239	1.98306	2.80316	2.80097
ENSMUSG00000000889	Dbh	NA	NA	NA	NA	NA	NA	NA	NA	NA	NA	NA	NA	NA	NA	NA	NA	NA	NA	NA	NA	NA	NA	NA	NA	NA	NA	NA	NA	NA	NA	2.1381	2.15709	2.14574	2.2089	2.19669	2.2038	NA	NA	NA	NA	NA	NA	NA	NA	NA	NA	2.14698	2.20313
ENSMUSG00000000902	Smarcb1	8.57101	8.67301	8.48032	8.61833	8.55289	8.6988	8.14978	8.30927	8.27682	8.37274	7.99648	8.27798	8.41368	8.37794	8.28554	8.40745	8.20774	8.41558	8.55474	8.25126	8.3247	8.38278	8.26027	8.19849	8.90241	8.83587	8.86752	8.85385	8.82276	8.778	9.84679	9.57404	9.76588	9.86212	9.7479	9.75778	8.57478	8.62334	8.24529	8.21573	8.39581	8.30024	8.3769	8.28051	8.8686	8.8182	9.7289	9.78927
ENSMUSG00000000915	Hip1r	6.40138	6.2182	6.02003	6.26772	6.20083	6.18909	5.68534	5.67717	5.64007	5.52803	5.48185	5.84953	5.99654	5.79843	5.80499	5.8706	5.91991	5.75798	6.15732	5.9728	5.98534	6.0321	6.0766	6.1812	6.11945	6.12763	6.01663	5.97878	6.17403	6.12676	6.82859	6.70953	6.9771	6.84439	6.80788	6.57022	6.2132	6.21922	5.66753	5.61981	5.89748	5.86517	6.03849	6.09663	6.08791	6.09319	6.83841	6.74083
ENSMUSG00000000916	Nsun5	2.36268	2.27232	2.29215	2.29004	2.30563	2.27035	2.24899	2.26516	2.29229	2.27087	2.25347	2.25005	2.04947	2.07304	2.08545	2.03639	2.05945	2.08064	2.66699	2.65835	2.64794	2.68443	2.67712	2.59874	2.42489	2.42557	2.41275	2.45171	2.46777	2.42704	3.77833	3.76723	3.82205	3.69004	3.76361	3.76325	2.30905	2.28867	2.26881	2.25813	2.06126	2.06043	2.65776	2.65343	2.42107	2.44884	3.7892	3.73897
ENSMUSG00000000934	Top1mt	3.75314	3.80947	3.77159	3.78439	3.79934	3.87722	3.66223	3.65167	3.67658	3.62878	3.7637	3.62531	3.4352	3.39892	3.38588	3.38763	3.38062	3.44359	3.56387	3.4887	3.51754	3.49861	3.49202	3.54856	3.51155	3.45252	3.47299	3.45684	3.55296	3.47209	4.95878	4.81781	4.90642	4.95032	4.94194	4.85789	3.77807	3.82031	3.66349	3.6726	3.41706	3.38471	3.52337	3.51306	3.47902	3.49397	4.89434	4.91671
ENSMUSG00000000957	Mmp14	NA	NA	NA	NA	NA	NA	NA	NA	NA	NA	NA	NA	NA	NA	NA	NA	NA	NA	NA	NA	NA	NA	NA	NA	NA	NA	NA	NA	NA	NA	1.89175	1.89178	1.958	1.92184	1.9258	1.8775	NA	NA	NA	NA	NA	NA	NA	NA	NA	NA	1.91384	1.90838
ENSMUSG00000000959	Oxa1l	6.37804	6.44032	6.34994	6.4473	6.36603	6.36877	6.14077	6.21748	6.17539	6.21471	6.23386	6.0944	6.17299	6.3188	6.10898	6.26362	6.17469	6.23545	6.23005	6.18617	6.20852	6.16733	6.21983	6.1775	6.39013	6.31434	6.29388	6.38289	6.3718	6.29743	7.39896	7.4246	7.42755	7.30978	7.3091	7.32302	6.38944	6.39403	6.17788	6.18099	6.24589	6.18243	6.20824	6.18822	6.33278	6.35071	7.41703	7.31397
ENSMUSG00000000976	Heatr6	5.14605	4.94619	4.99628	4.96432	5.01166	4.97263	4.46228	4.54721	4.47172	4.53927	4.28104	4.38228	4.49697	4.47368	4.50787	4.45434	4.51187	4.49834	4.66602	4.64937	4.71407	4.64686	4.64215	4.68673	5.14806	5.09944	5.05847	5.26278	5.09233	5.12542	5.89914	5.92634	5.97273	5.94282	5.95694	5.98786	5.02951	4.98287	4.49374	4.40086	4.48532	4.49136	4.67649	4.65858	5.10199	5.16018	5.93273	5.96254
ENSMUSG00000000983	Wfdc18	NA	NA	NA	NA	NA	NA	NA	NA	NA	NA	NA	NA	NA	NA	NA	NA	NA	NA	NA	NA	NA	NA	NA	NA	NA	NA	NA	NA	NA	NA	1.87233	1.87562	1.89061	1.91387	1.94635	1.91932	NA	NA	NA	NA	NA	NA	NA	NA	NA	NA	1.87952	1.92651
ENSMUSG00000001016	Ilf2	8.46713	8.53528	8.6686	8.42421	8.51181	8.61538	8.28623	8.36133	8.32319	8.23883	8.55323	8.42122	8.04706	8.17978	8.08379	8.12472	8.1048	8.12852	8.26294	8.15595	8.34907	8.22168	8.20598	8.1184	8.82454	8.82315	8.68514	8.72154	8.78196	8.75977	9.6579	9.60181	9.67949	9.62994	9.51514	9.70768	8.557	8.51713	8.32358	8.40442	8.11342	8.10444	8.25599	8.18202	8.77761	8.75442	9.6464	9.61759
ENSMUSG00000001017	Chtop	8.08489	7.99907	8.04015	8.0255	7.98951	8.0323	7.81205	7.85432	7.79956	7.82859	7.82422	7.99186	7.78403	7.75161	7.63188	7.78586	7.70156	7.72355	7.69954	7.65464	7.74995	7.66556	7.76046	7.60791	8.11191	8.11558	8.03446	8.0909	7.9805	8.01516	8.89982	8.98277	8.88805	8.83839	8.71553	8.82682	8.04137	8.01577	7.82198	7.88156	7.76782	7.70643	7.70138	7.67798	8.08732	8.02885	8.92355	8.79358
ENSMUSG00000001018	Snapin	5.08089	5.08871	4.94314	5.01499	5.11474	5.00069	4.7735	4.74518	4.70836	4.75355	4.65746	4.67296	4.48861	4.43304	4.47374	4.42794	4.43612	4.44729	4.92118	4.7586	4.87473	4.8291	4.85672	4.89116	4.78906	4.83095	4.7977	4.67336	4.7419	4.73363	5.46381	5.52535	5.52608	5.49163	5.54969	5.58907	5.03758	5.04348	4.74235	4.69466	4.46083	4.44593	4.8515	4.859	4.8059	4.7163	5.50508	5.54346
ENSMUSG00000001025	S100a6	2.36043	2.35743	2.39445	2.39429	2.36696	2.4505	NA	NA	NA	NA	NA	NA	NA	NA	NA	NA	NA	NA	NA	NA	NA	NA	NA	NA	2.62965	2.63811	2.52538	2.5689	2.58145	2.58248	4.02868	4.0397	4.0325	4.16748	4.18439	4.19064	2.37077	2.40392	NA	NA	NA	NA	NA	NA	2.59771	2.57761	4.03362	4.18084
ENSMUSG00000001034	Mapk7	3.01958	3.10659	2.98929	3.01091	3.07523	3.02033	3.39092	3.39765	3.38051	3.49977	3.47728	3.3656	3.41271	3.41172	3.43174	3.45571	3.50665	3.4419	3.61636	3.53355	3.56308	3.63826	3.58949	3.59863	3.74956	3.66741	3.64081	3.78885	3.69342	3.68744	4.66571	4.76579	4.71544	4.66372	4.73763	4.72637	3.03849	3.03549	3.38969	3.44755	3.41221	3.4647	3.571	3.60879	3.68593	3.72324	4.71565	4.70924
ENSMUSG00000001036	Epn2	8.29814	8.40395	8.36917	8.31585	8.2939	8.19317	8.14053	7.98122	7.9594	8.27374	8.05305	7.7913	8.15898	8.12488	8.18628	8.02947	8.14983	8.04182	8.19302	8.10577	8.1754	8.0235	8.02242	7.91326	8.38966	8.60681	8.39552	8.54099	8.63929	8.38817	9.48361	9.57882	9.43586	9.54354	9.53721	9.61255	8.35709	8.26764	8.02705	8.03936	8.14193	8.12186	8.15806	7.98639	8.46399	8.52282	9.49943	9.56444
ENSMUSG00000001039	B9d1	4.76773	4.607	4.68707	4.69276	4.6901	4.54508	4.15228	4.16473	4.13715	4.0388	4.19978	4.1768	4.06013	4.06205	4.06106	4.04476	4.1132	4.00226	3.8933	3.97624	3.96737	3.92067	3.89501	3.98321	4.49299	4.50917	4.63091	4.62779	4.47979	4.52108	5.27493	5.45243	5.25812	5.25527	5.47915	5.37768	4.68727	4.64265	4.15139	4.13846	4.06109	4.07301	3.94564	3.93296	4.54436	4.54289	5.32849	5.3707
ENSMUSG00000001052	Sec24b	7.70739	7.7359	7.78897	7.76894	7.73301	7.56229	7.53241	7.30338	7.34334	7.38298	7.31735	7.2454	7.56602	7.34171	7.49969	7.47208	7.43988	7.42945	7.05204	7.24895	7.22172	7.43033	7.28953	7.36877	7.72719	7.60119	7.78721	7.77357	7.66335	7.75934	8.77145	8.794	8.63016	8.79269	8.81677	8.86897	7.74409	7.68808	7.39305	7.31525	7.45387	7.47055	7.17424	7.36288	7.70519	7.73209	8.73187	8.82614
ENSMUSG00000001053	N4bp3	3.86309	3.86692	3.82773	3.8414	3.87222	3.78839	3.61491	3.53141	3.52328	3.76304	3.61605	3.53767	3.77553	3.79387	3.8347	3.77972	3.82313	3.77669	3.61729	3.54081	3.58874	3.58359	3.5611	3.56412	3.64563	3.72282	3.68666	3.68201	3.80439	3.63482	4.94685	5.04391	5.0256	5.0009	5.12578	5.01881	3.85258	3.834	3.55653	3.63892	3.7847	3.81252	3.58228	3.56961	3.68504	3.70707	5.00545	5.0485
ENSMUSG00000001054	Rmnd5b	7.12733	7.17489	7.18821	7.13753	7.21127	7.02311	6.65172	6.71965	6.6915	6.70363	6.83751	6.6494	6.8445	6.91436	6.9131	6.88983	6.92016	6.88973	6.82198	6.87254	6.801	6.88178	6.83172	6.7389	7.08543	7.28006	7.17378	7.20085	7.08717	7.24204	8.11821	8.29939	8.09936	8.35352	8.27669	8.31408	7.16348	7.12397	6.68762	6.73018	6.87943	6.9077	6.83184	6.81746	7.17976	7.17669	8.17232	8.31476
ENSMUSG00000001056	Nhp2	6.27322	6.10994	6.21416	6.19936	6.12794	6.13439	5.71989	5.58597	5.61556	5.42697	5.60774	5.62267	5.62669	5.48965	5.46689	5.59303	5.48897	5.59286	5.67412	5.68686	5.63273	5.6503	5.62188	5.81201	5.78087	5.79249	5.91528	5.71754	5.75774	5.70947	6.53235	6.82437	6.64693	6.6003	6.72327	6.74146	6.19911	6.1539	5.64048	5.55246	5.55817	5.5163	5.66457	5.69473	5.82955	5.72825	6.66789	6.68834
ENSMUSG00000001062	Vps9d1	5.11607	5.09179	5.1704	5.08454	5.21786	5.03199	4.69195	4.67414	4.73976	4.84396	4.60944	4.79472	4.85867	4.83606	4.88992	4.8804	4.88807	4.85171	5.31552	5.16529	5.07544	5.27171	5.1812	5.28564	5.2086	5.16033	5.13037	5.08913	5.21888	5.11194	6.07499	6.09394	6.26606	6.0558	6.22374	6.1868	5.12609	5.11146	4.70195	4.74938	4.84737	4.88613	5.18541	5.24618	5.16643	5.13998	6.145	6.15545
ENSMUSG00000001065	Zfp276	2.8461	2.78545	2.82444	2.81132	2.79559	2.83047	2.7362	2.69833	2.68858	2.70128	2.74492	2.69215	2.95722	2.90547	2.94906	2.98829	2.95722	2.95216	NA	NA	NA	NA	NA	NA	3.21617	3.29226	3.22048	3.28625	3.34731	3.28352	4.10598	4.19202	4.23803	4.20236	4.24106	4.1716	2.81866	2.81246	2.7077	2.71278	2.93134	2.96486	NA	NA	3.24297	3.30569	4.17868	4.20501
ENSMUSG00000001082	Mfsd10	4.39301	4.34249	4.28864	4.33163	4.25544	4.27376	3.84135	3.82469	3.84709	3.73516	3.83732	3.93599	4.14109	4.16735	4.11134	4.09893	4.14839	4.2034	4.16474	4.1651	4.23518	4.18746	4.20078	4.22519	4.13222	4.15785	4.24582	4.08529	4.07059	4.11193	5.06992	5.1794	5.20459	5.11053	5.13266	5.12685	4.34138	4.28694	3.83771	3.83616	4.15422	4.11956	4.18834	4.20448	4.17863	4.08927	5.1513	5.12335
ENSMUSG00000001089	Luzp1	8.93162	8.93679	8.89974	8.83413	8.78088	8.86757	8.71928	8.61477	8.69447	9.11337	8.86903	8.72499	8.59327	8.31892	8.53502	8.52739	8.52402	8.38047	8.24123	8.30865	8.22648	8.21869	8.22508	8.16628	9.07279	9.05735	8.80251	8.89465	8.92616	9.03615	9.91089	9.70676	9.68624	9.73731	9.63297	9.62075	8.92272	8.82753	8.67617	8.90246	8.45609	8.52881	8.25879	8.20335	8.97755	8.95232	9.76796	9.66368
ENSMUSG00000001098	Kctd10	6.71254	6.89778	6.87311	6.84528	6.87848	6.90521	6.97783	6.68181	6.74476	7.08576	6.62659	6.74492	6.69933	6.65852	6.62199	6.58427	6.67559	6.61305	6.68976	6.61897	6.51233	6.55944	6.61214	6.60485	7.11507	7.31692	7.32259	7.2748	7.19904	7.16179	8.25287	7.99941	8.02452	8.07941	7.99429	7.99947	6.82781	6.87632	6.80147	6.81909	6.67892	6.62728	6.60702	6.59214	7.25153	7.21188	8.09227	8.02439
ENSMUSG00000001100	Poldip2	6.8012	6.80835	6.69841	6.67045	6.69685	6.58412	5.94783	6.11081	5.92312	5.86179	5.90591	6.15096	6.32737	6.29034	6.31295	6.24894	6.30214	6.20327	6.31309	6.43893	6.40753	6.4007	6.42648	6.42054	6.43789	6.52114	6.55681	6.52642	6.58036	6.42178	7.39094	7.53631	7.37663	7.34783	7.3827	7.39282	6.76932	6.65047	5.99392	5.97289	6.30885	6.28801	6.38651	6.4159	6.50528	6.50952	7.43463	7.37445
ENSMUSG00000001103	Sebox	2.39394	2.36345	2.3575	2.4268	2.35512	2.39928	NA	NA	NA	NA	NA	NA	NA	NA	NA	NA	NA	NA	NA	NA	NA	NA	NA	NA	2.03248	2.03425	2.0249	2.07322	2.07007	2.03848	2.70744	2.78166	2.78043	2.67324	2.76157	2.72979	2.37163	2.39373	NA	NA	NA	NA	NA	NA	2.03055	2.06059	2.75651	2.72154
ENSMUSG00000001105	Ift20	6.70396	6.54356	6.58541	6.56066	6.55824	6.56197	6.30453	6.4299	6.4028	6.30532	6.37881	6.48588	5.78455	5.97912	6.10799	5.96118	5.94099	5.90555	6.15617	6.06365	6.039	6.12975	6.07273	6.08796	6.44505	6.46596	6.52026	6.39635	6.27263	6.45711	7.14168	7.34861	7.17913	7.08801	7.26819	7.25315	6.61098	6.56029	6.37908	6.39	5.88183	6.00339	6.08627	6.09681	6.47709	6.37537	7.22314	7.20312
ENSMUSG00000001119	Col6a1	3.17614	3.00812	3.01908	3.02424	3.02443	3.06249	3.15233	3.15693	3.12602	3.25173	3.11291	3.14079	3.07557	3.01393	3.11124	3.02174	3.09811	3.03417	3.11446	3.10473	3.1544	3.11956	3.18734	3.17849	2.7579	2.79356	2.79933	2.85265	2.7876	2.83233	4.14996	4.17623	4.25126	4.27124	4.18475	4.26348	3.06778	3.03705	3.14509	3.16847	3.04475	3.07703	3.12453	3.1618	2.7836	2.8242	4.19249	4.23982
ENSMUSG00000001120	Pcbp3	7.14457	7.12481	6.91749	6.97991	7.1358	7.02658	6.44723	6.62716	6.44756	6.29073	6.43476	6.54478	6.43257	6.53707	6.54324	6.46107	6.57339	6.67774	6.71409	6.66714	6.67165	6.70749	6.65571	6.9226	7.12651	7.11221	7.30178	7.11841	7.08832	7.08023	7.99905	7.96658	7.99707	7.93511	7.94665	7.9254	7.06229	7.04743	6.50731	6.42342	6.48482	6.5259	6.68429	6.76194	7.18016	7.09565	7.98757	7.93572
ENSMUSG00000001123	Lgals9	NA	NA	NA	NA	NA	NA	NA	NA	NA	NA	NA	NA	NA	NA	NA	NA	NA	NA	NA	NA	NA	NA	NA	NA	NA	NA	NA	NA	NA	NA	2.1636	2.16147	2.18568	2.14231	2.14718	2.12416	NA	NA	NA	NA	NA	NA	NA	NA	NA	NA	2.17025	2.13788
ENSMUSG00000001127	Araf	8.15451	7.92649	8.08373	8.11009	8.08998	8.00518	7.78756	7.68082	7.48519	7.5365	7.73163	7.79929	7.85796	7.86938	7.84401	7.81528	7.71943	7.88223	8.12377	7.89124	7.91565	7.88261	7.94092	7.98061	8.17745	8.01884	8.08866	8.28541	8.03926	7.95687	9.00824	9.11868	9.11928	9.17327	9.14301	9.19517	8.05491	8.06842	7.65119	7.68914	7.86367	7.79291	7.97689	7.93471	8.09498	8.09385	9.08207	9.17048
ENSMUSG00000001134	Uxt	NA	NA	NA	NA	NA	NA	NA	NA	NA	NA	NA	NA	NA	NA	NA	NA	NA	NA	NA	NA	NA	NA	NA	NA	NA	NA	NA	NA	NA	NA	2.1204	2.14951	2.13548	2.10625	2.13459	2.15394	NA	NA	NA	NA	NA	NA	NA	NA	NA	NA	2.13513	2.1316
ENSMUSG00000001138	Cnnm3	5.25078	5.30645	5.31982	5.27548	5.32972	5.30414	5.18447	4.92625	5.14663	5.08782	4.90328	5.14861	4.91375	4.86385	4.87116	4.96253	4.90313	4.79973	5.12803	5.13892	5.00493	5.00869	5.23021	5.04487	5.56353	5.51063	5.58515	5.53406	5.65615	5.60525	6.34985	6.41446	6.29533	6.37169	6.28106	6.27012	5.29235	5.30311	5.08578	5.04657	4.8888	4.91227	5.09062	5.09459	5.5531	5.59849	6.35321	6.30762
ENSMUSG00000001143	Lman2l	6.4937	6.34911	6.2785	6.3707	6.47837	6.31394	5.98814	6.03002	6.10651	6.08645	5.99468	6.06424	6.19015	6.25417	6.16333	6.15317	6.23413	6.16197	6.29125	6.13721	6.41126	6.11753	6.32248	6.29226	6.79414	6.74928	6.76628	6.73328	6.78765	6.50563	7.6655	7.78618	7.76004	7.48132	7.51592	7.46379	6.37377	6.38767	6.04156	6.04846	6.22216	6.18354	6.27991	6.24409	6.7699	6.67552	7.73724	7.48701
ENSMUSG00000001150	Mcm3ap	6.92895	7.12823	7.02837	7.01408	7.07166	6.91562	6.6398	6.56141	6.52541	6.37728	6.63121	6.37777	7.14454	6.89371	6.99469	7.09871	7.03785	6.97494	6.59927	6.82638	6.65794	6.96595	6.89171	6.88811	7.10156	7.246	7.01769	7.0379	6.95522	7.20346	8.04421	8.01574	8.22375	8.21083	8.30486	8.13855	7.02851	7.00045	6.57554	6.46209	7.01912	7.04375	6.69453	6.91526	7.12175	7.06553	8.09457	8.21808
ENSMUSG00000001151	Pcnt	6.51	6.58926	6.58713	6.6647	6.51257	6.42034	5.9587	5.87251	5.8746	5.74019	6.00929	5.94509	6.02241	6.01169	6.08037	5.99116	6.06934	5.9968	6.02708	6.02318	5.80233	5.96267	5.95364	6.14773	6.57113	6.46608	6.25462	6.44421	6.22956	6.5267	7.25102	7.01273	7.29073	7.38072	7.26536	7.27687	6.56213	6.53254	5.90194	5.89819	6.01705	6.04696	5.95086	6.02134	6.43061	6.40016	7.18483	7.30765
ENSMUSG00000001156	Mxd1	5.38062	5.13884	5.3922	5.17949	5.21787	5.19533	4.93835	5.03803	4.99129	5.27832	5.0243	5.06951	4.95678	4.99101	4.8951	4.89389	4.94998	4.92401	4.84674	4.93761	4.89965	4.91096	4.81221	4.79577	5.20997	5.12196	5.09583	5.09678	5.15324	5.11492	6.21622	6.14363	6.19803	6.29564	6.06819	6.12728	5.30389	5.19757	4.98923	5.12405	4.9739	4.91299	4.89467	4.83965	5.14259	5.12165	6.18596	6.16371
ENSMUSG00000001157	Gmcl1	5.77318	5.80021	5.81618	5.76671	5.82914	5.78634	5.54208	5.452	5.49679	5.33049	5.41675	5.5948	5.54487	5.53034	5.50357	5.58153	5.5201	5.48965	5.12406	5.24194	5.31954	5.25462	5.2491	5.23021	5.84812	5.79768	5.76744	5.84167	5.71815	5.81382	6.66653	6.62167	6.62273	6.61339	6.62797	6.7491	5.79652	5.79406	5.49695	5.44735	5.53761	5.53507	5.22851	5.24464	5.80442	5.79121	6.63698	6.66349
ENSMUSG00000001158	Snrnp27	6.74556	6.53112	6.6269	6.53533	6.72071	6.63356	6.52668	6.51069	6.39226	6.31757	6.46442	6.35624	6.57309	6.43326	6.45511	6.44083	6.3995	6.54834	6.41305	6.47982	6.56828	6.50641	6.52773	6.41085	6.75403	6.75818	6.6255	6.6808	6.69523	6.65605	7.6175	7.67874	7.6692	7.74902	7.6799	7.61414	6.63453	6.62987	6.47654	6.37941	6.50318	6.43181	6.48705	6.48166	6.71257	6.67736	7.65515	7.68102
ENSMUSG00000001173	Ocrl	7.7816	7.95096	7.9172	7.93971	7.91786	7.95423	7.68232	7.65252	7.83963	7.81924	7.69502	7.73301	7.56773	7.6152	7.68213	7.70641	7.74304	7.66298	7.42261	7.60685	7.36456	7.54732	7.46919	7.36181	8.26811	8.39663	8.34396	8.30832	8.19333	8.46121	9.03398	8.89498	8.94365	9.11233	9.08317	9.042	7.88325	7.93727	7.72482	7.74909	7.59147	7.71053	7.46468	7.45944	8.33623	8.32095	8.95753	9.07917
ENSMUSG00000001175	Calm1	13.7868	13.9114	13.9041	13.8698	13.9194	14.0967	13.6317	13.8508	13.8432	13.7218	13.7823	13.7465	13.6324	13.6541	13.7196	13.5649	13.5971	13.5738	13.5385	13.5971	13.5711	13.4956	13.4651	13.2891	14.0745	14.1883	13.9995	14.0706	14.0587	14.1075	14.8768	14.8231	14.8194	15.049	15.0321	14.8668	13.8674	13.962	13.7752	13.7502	13.6433	13.6272	13.5689	13.4166	14.0874	14.0789	14.8398	14.9826
ENSMUSG00000001211	Agpat3	7.20662	7.1746	7.12576	7.17453	7.15918	7.01864	6.66765	6.61056	6.50537	6.44401	6.48795	6.54421	7.05049	6.86161	6.97659	6.80937	6.95681	6.90335	6.7385	6.66863	6.82636	6.84002	6.88124	6.92624	6.91362	6.92958	6.84945	6.89327	6.9271	6.83646	7.8762	7.92115	7.79731	7.82221	7.94118	7.91437	7.16899	7.11745	6.59453	6.49206	6.95605	6.91426	6.74449	6.8825	6.89755	6.88561	7.86489	7.89258
ENSMUSG00000001227	Sema6b	7.80459	7.77066	7.5002	7.66938	7.5683	7.53443	6.93223	6.91555	7.01015	6.55805	6.89875	6.96756	7.17801	7.27563	7.15528	7.29046	7.0806	7.22611	7.25762	7.2112	7.22641	7.31586	7.32354	7.42205	7.44325	7.49931	7.41049	7.58422	7.4258	7.33888	8.27759	8.36719	8.33971	8.30487	8.28073	8.31644	7.69182	7.5907	6.95264	6.80812	7.22682	7.17545	7.23174	7.35381	7.45102	7.44964	8.32816	8.30068
ENSMUSG00000001229	Dpp9	7.70248	7.71609	7.56625	7.72996	7.78843	7.59108	7.54107	7.39503	7.29349	7.17657	7.51321	7.1889	7.27648	7.33072	7.26	7.39126	7.43476	7.23765	7.33679	7.37892	7.47195	7.45137	7.43035	7.55976	7.69805	7.95085	7.73372	7.88803	7.74583	7.74292	8.70414	8.75792	8.62451	8.59442	8.65883	8.57802	7.66161	7.70316	7.40986	7.2929	7.3036	7.36201	7.39589	7.48049	7.7942	7.79226	8.69552	8.61042
ENSMUSG00000001240	Ramp2	5.85083	5.72871	5.89943	5.75443	5.80071	5.68986	5.29148	5.54823	5.38674	5.41367	5.25996	5.31688	5.46868	5.4708	5.55237	5.55581	5.38349	5.53465	5.70904	5.61786	5.74525	5.7173	5.77346	5.62783	5.60206	5.61141	5.82442	5.79133	5.74301	5.7432	6.60226	6.81649	6.76581	6.7852	6.58433	6.69105	5.82632	5.74833	5.40882	5.33017	5.46974	5.49722	5.69072	5.70619	5.6793	5.75918	6.72819	6.68686
ENSMUSG00000001248	Gramd1a	7.40463	7.58536	7.37237	7.60741	7.59141	7.34969	7.1362	7.04538	6.9157	6.92034	7.13515	6.95813	7.44059	7.23378	7.18844	7.18187	7.2649	7.30438	7.20159	7.15705	7.07817	7.28159	7.24573	7.2564	7.43524	7.28336	7.34371	7.43473	7.24939	7.27542	8.37117	8.35088	8.38507	8.3761	8.42692	8.39395	7.45412	7.51617	7.03243	7.00454	7.33718	7.21174	7.1456	7.26124	7.3541	7.31985	8.36904	8.39899
ENSMUSG00000001260	Gabrg1	6.02756	5.90161	6.14488	6.05251	5.97936	6.14071	6.14128	5.95078	6.03959	6.15172	6.16438	6.37412	5.19873	5.00729	5.24892	5.1562	5.20394	5.12908	5.2826	5.45578	5.31205	5.37434	5.16588	5.38499	6.29309	5.93119	6.04121	5.82124	5.83362	6.01055	5.9876	5.70908	6.1291	5.92129	5.7843	5.84679	6.02468	6.05752	6.04388	6.23007	5.10301	5.20302	5.35014	5.3084	6.0885	5.88847	5.94193	5.8508
ENSMUSG00000001270	Ckb	9.79338	9.56606	9.4574	9.69427	9.57604	9.46545	9.16083	9.04297	8.93017	9.06161	8.99666	9.24811	9.62585	9.26464	9.2083	9.44232	9.25279	9.24597	9.53948	9.23489	9.25161	9.55778	9.31707	9.7422	9.6169	9.74955	9.59941	9.53102	9.57121	9.53164	10.3806	10.4583	10.6625	10.6308	10.5257	10.5016	9.60561	9.57858	9.04466	9.10213	9.44524	9.30114	9.34199	9.53902	9.65528	9.54462	10.5004	10.5527
ENSMUSG00000001280	Sp1	3.9731	4.05077	4.0739	4.09137	4.0162	3.97169	3.43744	3.5107	3.4932	3.46808	3.40798	3.48366	3.79948	3.89453	3.93691	3.85331	3.82095	3.91335	3.92796	3.89351	3.96501	3.9615	3.84345	3.90912	4.06779	3.9847	4.08351	3.96785	4.06313	4.04955	4.86449	4.874	4.93909	4.9108	4.86142	4.9241	4.03259	4.02642	3.48045	3.45324	3.84701	3.87039	3.92883	3.90469	4.04533	4.02684	4.89252	4.89877
ENSMUSG00000001285	Myg1	6.04073	6.05392	6.11674	6.03073	6.11795	5.9964	5.91241	5.83832	5.79519	5.95206	5.83326	5.82243	5.8248	5.90932	5.80064	5.86736	5.86489	5.90222	5.89667	5.86603	5.80741	5.88346	5.88058	5.89397	6.2779	6.35668	6.16957	6.31801	6.33063	6.28627	7.18523	7.20275	7.24693	7.20933	7.21653	7.19724	6.07046	6.04836	5.84864	5.86925	5.86706	5.8443	5.8567	5.88601	6.26805	6.31164	7.21164	7.2077
ENSMUSG00000001288	Rarg	NA	NA	NA	NA	NA	NA	NA	NA	NA	NA	NA	NA	NA	NA	NA	NA	NA	NA	1.43591	1.43948	1.49965	1.44265	1.45398	1.51138	1.56253	1.58875	1.58774	1.55244	1.52997	1.54869	1.97087	2.02799	2.00767	1.96904	1.98987	1.98667	NA	NA	NA	NA	NA	NA	1.45835	1.46934	1.57967	1.5437	2.00218	1.98186
ENSMUSG00000001289	Pfdn5	7.24584	7.12487	7.07339	7.14172	7.16	6.99942	6.88517	6.89169	6.67	6.80572	6.60947	6.8314	6.92073	6.88244	6.72072	6.75167	6.82324	6.86831	6.86609	6.78693	6.96993	6.91444	6.78568	6.91596	6.73271	6.85869	6.88115	6.97448	6.74702	6.85125	7.75338	8.01266	7.80449	7.80197	7.90538	7.94631	7.14803	7.10038	6.81562	6.74886	6.90159	6.76521	6.87432	6.87203	6.82418	6.85759	7.85684	7.88455
ENSMUSG00000001300	Efnb2	7.04903	6.97872	7.1194	7.02285	7.06114	7.11733	6.95569	6.69093	6.79087	6.77135	6.65489	6.90433	6.68066	6.63729	6.74417	6.76583	6.86156	6.64133	6.65239	6.52687	6.5317	6.59311	6.44432	6.78056	7.08318	6.93098	6.88218	6.92802	6.82827	7.01951	7.6631	7.73225	7.73078	7.63501	7.45985	7.47382	7.04905	7.06711	6.8125	6.77686	6.65897	6.79052	6.57032	6.606	6.96545	6.92527	7.70871	7.5229
ENSMUSG00000001305	Rrp15	4.32301	4.30427	4.38015	4.29447	4.245	4.36925	3.74478	3.80253	3.75693	3.7729	3.63867	3.749	3.83064	3.90306	3.8695	3.86905	3.97377	3.87659	3.8871	3.876	3.85724	3.90474	3.87714	3.91739	3.77098	3.72062	3.68849	3.71955	3.70835	3.71643	4.9057	4.99054	4.92316	4.98526	4.95953	4.96637	4.33581	4.30291	3.76808	3.72019	3.86685	3.90411	3.87345	3.89976	3.7267	3.71478	4.9398	4.97039
ENSMUSG00000001313	Rnd2	NA	NA	NA	NA	NA	NA	NA	NA	NA	NA	NA	NA	NA	NA	NA	NA	NA	NA	NA	NA	NA	NA	NA	NA	NA	NA	NA	NA	NA	NA	1.91708	1.917	1.954	1.95488	1.93635	1.94289	NA	NA	NA	NA	NA	NA	NA	NA	NA	NA	1.92936	1.94471
ENSMUSG00000001323	Srr	8.99794	9.14784	9.12158	9.14624	9.13134	9.08623	8.74987	8.96152	8.91498	8.87861	9.03009	8.74668	8.72152	8.88127	8.8574	8.70876	8.75868	8.82866	8.84577	8.75946	8.67961	8.79055	8.57083	8.58718	9.33394	9.47321	9.36278	9.38635	9.34923	9.32592	10.1529	10.2033	10.167	10.2873	10.191	10.261	9.08912	9.12127	8.87545	8.88513	8.8014	8.77495	8.76161	8.64952	9.38998	9.35383	10.1744	10.2464
ENSMUSG00000001334	Fndc5	6.2365	6.09707	6.09296	6.16234	6.05995	6.03344	5.67481	5.68911	5.53096	5.82508	5.74419	5.65368	5.58131	5.52445	5.652	5.53149	5.46328	5.59763	5.64948	5.3567	5.54915	5.5299	5.51503	5.55356	5.82838	5.70037	5.80594	5.86186	5.77341	5.64998	6.58562	6.57932	6.51241	6.417	6.45771	6.46301	6.14218	6.08524	5.63162	5.74099	5.55288	5.54892	5.51844	5.53283	5.77823	5.76175	6.55912	6.4459
ENSMUSG00000001348	Acp5	NA	NA	NA	NA	NA	NA	1.01282	1.02174	1.02437	1.08917	1.133	1.01296	NA	NA	NA	NA	NA	NA	NA	NA	NA	NA	NA	NA	NA	NA	NA	NA	NA	NA	NA	NA	NA	NA	NA	NA	NA	NA	1.01964	1.07838	NA	NA	NA	NA	NA	NA	NA	NA
ENSMUSG00000001366	Fbxo9	6.36248	6.28685	6.17654	6.30361	6.3563	6.23002	5.8332	5.69023	5.93028	5.66438	5.91293	5.76052	5.89116	5.93949	5.90943	5.98208	6.00709	6.03538	5.89425	5.88543	5.84642	5.92379	5.96177	5.94183	5.99475	6.07372	5.84058	5.91334	5.94186	6.00048	6.70135	6.91656	6.81511	7.03657	6.96896	7.04679	6.27529	6.29664	5.81791	5.77928	5.91533	5.9662	5.87537	5.94246	5.96968	5.95189	6.81101	7.01744
ENSMUSG00000001376	Vps50	9.12999	9.24727	9.26534	9.24075	9.23387	9.28389	9.10876	8.9848	9.20057	9.24244	9.21987	9.03429	8.91752	8.97212	9.06826	9.04649	8.97194	8.97166	8.63043	8.93253	8.7962	8.82659	8.77563	8.63019	9.52797	9.50227	9.46702	9.35452	9.43295	9.55427	10.309	10.2521	10.3499	10.3525	10.2903	10.388	9.2142	9.25284	9.09804	9.16553	8.94482	9.0289	8.78639	8.74414	9.49908	9.44724	10.3037	10.3436
ENSMUSG00000001380	Hars	8.22753	8.31772	8.28817	8.23435	8.2347	8.20027	7.9439	8.04054	7.84889	7.95528	8.00094	8.01523	8.08731	8.11397	7.97777	8.04186	7.99426	8.07484	8.0604	7.99101	8.11761	8.03065	7.98172	8.06063	8.39346	8.15871	8.25437	8.20323	8.10955	8.17307	9.31563	9.19824	9.24943	9.24418	9.21156	9.32725	8.27781	8.22311	7.94444	7.99049	8.10064	8.00463	8.05634	8.02433	8.26885	8.16195	9.25443	9.261
ENSMUSG00000001383	Zmat2	9.79445	9.65366	9.7464	9.61291	9.69245	9.57163	9.21368	9.50329	9.18881	9.17047	9.32958	9.25304	9.56257	9.49571	9.25379	9.22204	9.27841	9.591	9.50673	9.16246	9.49956	9.33407	9.30106	9.2493	9.61645	9.39517	9.48693	9.40501	9.58205	9.40955	10.49	10.4877	10.4458	10.4087	10.3043	10.459	9.73151	9.62566	9.30193	9.25103	9.52914	9.25141	9.38958	9.29481	9.49952	9.46554	10.4745	10.3907
ENSMUSG00000001415	Smg5	6.9114	6.71287	6.79739	6.8035	6.88135	6.71443	6.5092	6.25949	6.41231	6.26299	6.46289	6.333	6.50738	6.63813	6.52982	6.64313	6.5558	6.55181	6.50308	6.41751	6.52709	6.46513	6.59364	6.51996	6.82603	6.84888	6.76808	6.75611	6.70743	6.86229	7.63745	7.76107	7.6652	7.72772	7.66686	7.77082	6.80722	6.79976	6.39367	6.35296	6.57275	6.57625	6.48256	6.52624	6.81433	6.77528	7.6879	7.7218
ENSMUSG00000001416	Cct3	9.10704	9.26957	9.24664	9.31691	9.188	9.20494	8.99563	9.01809	8.9947	8.99233	9.12292	8.99276	9.00674	9.02151	9.04835	8.92971	9.02998	9.04836	8.77247	8.99816	8.81912	9.00571	9.0188	8.90805	9.37734	9.58146	9.43491	9.45583	9.45507	9.57621	10.2303	10.2432	10.4186	10.513	10.3887	10.4065	9.20775	9.23662	9.0028	9.036	9.01412	9.00268	8.86325	8.97752	9.46457	9.4957	10.2974	10.4361
ENSMUSG00000001418	Glmp	5.51103	5.56344	5.54172	5.43626	5.56252	5.43706	5.20323	5.06332	5.06012	4.95396	5.05477	5.04059	5.00836	4.99714	4.91446	5.04593	4.99275	4.92008	5.04073	5.05881	5.05091	4.98247	5.06518	5.14928	5.24712	5.40086	5.46222	5.38107	5.44391	5.38513	6.306	6.474	6.41586	6.37134	6.36272	6.49978	5.53873	5.47861	5.10889	5.01644	5.00275	4.98438	5.05015	5.06564	5.37007	5.40337	6.39862	6.41128
ENSMUSG00000001419	Mef2d	9.02239	8.94237	8.89505	8.92577	8.95473	8.82349	8.79711	8.52736	8.49919	8.62259	8.44557	8.53882	8.82953	8.75623	8.69003	8.79133	8.68169	8.75659	8.63337	8.5434	8.61944	8.66192	8.74623	8.71295	9.09234	9.28499	9.00527	9.2975	9.15414	9.05728	10.0243	9.95215	10.0529	10.3479	10.3016	10.1398	8.95327	8.90133	8.60789	8.53566	8.79288	8.72102	8.59874	8.70703	9.12754	9.16964	10.0098	10.2631
ENSMUSG00000001424	Snd1	9.3634	9.22855	9.23339	9.37527	9.38594	9.17536	8.77291	8.99837	8.77762	9.00194	8.72014	8.68187	9.21733	9.17001	9.00228	8.93131	8.92804	9.16702	8.95097	8.93324	9.05654	9.16829	8.9954	8.95085	9.37397	9.6654	9.5056	9.57184	9.47221	9.38856	10.4018	10.4942	10.3722	10.5491	10.3451	10.4679	9.27511	9.31219	8.84963	8.80132	9.19367	8.95388	8.98025	9.03818	9.51499	9.47754	10.4227	10.454
ENSMUSG00000001436	Slc19a1	3.82814	3.80966	3.90561	3.7841	3.80539	3.84759	3.18994	3.31441	3.2189	3.20261	3.33145	3.33873	3.23855	3.26475	3.24082	3.26969	3.2777	3.27122	3.5684	3.56806	3.52017	3.51932	3.55536	3.58694	3.81293	3.82317	3.74365	3.75735	3.77387	3.84374	4.85616	4.98452	5.00603	4.8966	4.8601	4.85249	3.8478	3.81236	3.24108	3.29093	3.25165	3.26274	3.55221	3.55387	3.79325	3.79165	4.9489	4.86973
ENSMUSG00000001440	Kpnb1	9.46575	9.4577	9.40352	9.42248	9.37068	9.40024	8.98434	9.13747	9.03678	9.19455	8.92596	8.98138	9.14661	9.0817	9.11125	9.01287	9.08892	9.16968	9.07212	9.07035	9.06272	9.08123	8.92853	9.08441	9.53351	9.62205	9.53957	9.55853	9.52386	9.60954	10.3601	10.3503	10.4641	10.5106	10.47	10.4798	9.44232	9.3978	9.05286	9.03396	9.11415	9.07101	9.0684	9.03139	9.56504	9.56397	10.3915	10.4868
ENSMUSG00000001441	Npepps	9.62305	9.71314	9.90617	9.74633	9.72041	9.78921	9.47257	9.46252	9.68225	9.67626	9.61241	9.38953	9.2928	9.42589	9.4841	9.44541	9.48884	9.49542	9.20103	9.45791	9.31262	9.32272	9.40852	9.27725	10.0374	10.2763	10.0199	10.1614	10.0413	10.2208	10.9609	10.7496	10.9113	10.9694	10.9613	10.8636	9.74745	9.75198	9.53911	9.5594	9.35935	9.47278	9.32385	9.33616	10.1112	10.1412	10.8739	10.9315
ENSMUSG00000001445	Mrpl10	6.08698	6.20366	6.14576	6.20014	6.21929	6.16354	5.90053	5.88239	5.94845	5.94273	5.85248	6.12524	5.75763	5.88428	5.75227	5.81041	5.83572	5.79669	5.88565	5.72411	5.9087	5.92075	6.0152	6.09615	6.26155	6.40666	6.3053	6.4703	6.32062	6.27342	7.27039	7.3037	7.44423	7.38282	7.37085	7.29298	6.14547	6.19432	5.91045	5.97348	5.82095	5.79947	5.83948	6.0107	6.3245	6.35478	7.33944	7.34888
ENSMUSG00000001467	Cyp51	7.79008	7.90682	7.92643	7.85405	7.80496	8.02966	7.81267	7.72415	7.85445	7.93837	7.6636	7.93275	7.50367	7.54534	7.78079	7.59716	7.62438	7.41089	7.25474	7.35689	7.12791	7.18375	7.15934	7.37029	8.05457	7.99362	8.23277	8.21155	8.2233	8.40521	8.86001	8.90227	8.80085	8.76155	8.94933	8.73531	7.87444	7.89622	7.79709	7.8449	7.5245	7.66744	7.24651	7.23779	8.09365	8.28002	8.85438	8.8154
ENSMUSG00000001472	Tcf25	10.1848	10.1599	10.1079	10.1356	10.2117	10.2157	9.89906	9.94403	9.89328	9.83696	9.95445	9.96863	9.90885	9.77235	9.90771	9.8403	9.82488	9.84684	9.89995	9.79808	9.84142	9.80709	9.74055	9.79462	10.195	10.093	10.1873	10.2257	10.1704	10.1408	11.0576	10.9842	10.9461	10.9424	11.0284	10.9287	10.1508	10.1877	9.91212	9.92001	9.8406	9.85763	9.84648	9.78075	10.1584	10.179	10.996	10.9665
ENSMUSG00000001482	Def8	5.78041	5.7103	5.63412	5.75811	5.75903	5.65232	5.72466	5.47179	5.53958	5.66162	5.68747	5.5959	5.47841	5.48592	5.52003	5.47718	5.46406	5.34659	5.58274	5.50225	5.61999	5.62868	5.55046	5.63641	5.89658	5.89369	5.87612	5.87273	5.82163	5.83234	6.84289	6.81465	6.83213	6.72632	6.80824	6.79007	5.70828	5.72315	5.57868	5.64833	5.48217	5.48709	5.56832	5.60518	5.88879	5.84223	6.82989	6.77488
ENSMUSG00000001507	Itga3	5.66967	5.79217	5.68315	5.60395	5.74536	5.80056	5.40317	5.43612	5.41138	5.26179	5.48521	5.65841	5.44599	5.28149	5.38172	5.51314	5.51387	5.40055	5.58226	5.39106	5.53616	5.51577	5.47196	5.60647	5.92728	5.72097	5.82275	5.67508	5.77605	5.7787	6.6654	6.44505	6.6944	6.48499	6.4064	6.51454	5.715	5.71662	5.41689	5.46847	5.36374	5.46958	5.50316	5.5314	5.82367	5.74328	6.60162	6.46864
ENSMUSG00000001518	Itfg2	4.95892	4.89584	4.8954	4.88989	4.89603	4.89053	4.52397	4.39873	4.42705	4.43954	4.48217	4.48558	4.15928	4.15703	4.15742	4.19348	4.18729	4.13476	4.65152	4.66026	4.55603	4.65166	4.72281	4.66068	5.00179	5.04823	5.00407	4.89618	4.89593	4.89403	5.78878	5.73627	5.84244	5.79706	5.77372	5.81811	4.91672	4.89215	4.44992	4.4691	4.15816	4.17939	4.6226	4.67838	5.01803	4.89538	5.78916	5.7963
ENSMUSG00000001520	Nrip2	NA	NA	NA	NA	NA	NA	NA	NA	NA	NA	NA	NA	NA	NA	NA	NA	NA	NA	NA	NA	NA	NA	NA	NA	NA	NA	NA	NA	NA	NA	2.53635	2.53552	2.56896	2.52447	2.5658	2.56711	NA	NA	NA	NA	NA	NA	NA	NA	NA	NA	2.54694	2.55246
ENSMUSG00000001521	Tulp3	3.3285	3.34705	3.36853	3.323	3.34679	3.40438	2.79973	2.7329	2.72345	2.76247	2.72129	2.74208	3.47176	3.3286	3.39442	3.37396	3.36638	3.35517	2.90874	2.89192	2.95106	2.90462	2.91827	2.97606	3.60125	3.60174	3.60605	3.62522	3.67602	3.60654	4.15268	4.2523	4.1758	4.15655	4.15882	4.1353	3.34803	3.35806	2.75202	2.74195	3.40018	3.37825	2.91724	2.93298	3.60302	3.63593	4.19359	4.15022
ENSMUSG00000001524	Gtf2h4	5.29782	5.23467	5.19893	5.31552	5.28113	5.24115	5.21756	5.06271	5.11124	4.98186	5.00998	5.02823	4.66801	4.69495	4.67255	4.66896	4.73994	4.64553	4.99506	4.88263	4.80803	4.7665	4.91302	4.88267	5.2505	5.29289	5.36188	5.38019	5.32683	5.3593	6.17784	6.27418	6.29519	6.22853	6.29869	6.27621	5.24381	5.27927	5.1305	5.00669	4.68148	4.69381	4.89524	4.85406	5.30176	5.35544	6.24907	6.26781
ENSMUSG00000001525	Tubb5	10.8688	10.9463	10.8326	10.8142	10.8443	11.0248	10.6215	10.5245	10.5127	10.5681	10.5886	10.6913	10.6842	10.5707	10.581	10.7201	10.7008	10.6862	10.6876	10.5326	10.6333	10.6479	10.6171	10.6366	10.9498	10.9898	11.025	10.9409	10.9576	10.8625	11.8392	11.8048	11.8448	11.4893	11.4955	11.3093	10.8825	10.8944	10.5529	10.616	10.6274	10.6673	10.6179	10.6339	10.9882	10.9203	11.8296	11.4314
ENSMUSG00000001542	Ell2	5.89462	5.8877	5.87916	5.87811	5.85902	5.94902	5.73615	5.70547	5.78902	5.982	5.48347	5.77148	5.70036	5.591	5.66312	5.66559	5.66652	5.60243	5.19617	5.43872	5.2939	5.37754	5.46807	5.47996	6.20542	6.03675	5.97719	5.94803	5.93709	6.10626	6.82553	6.60814	6.71245	6.63588	6.67668	6.49167	5.88716	5.89538	5.74355	5.74565	5.64568	5.66508	5.3096	5.44185	6.07312	5.99713	6.71538	6.60141
ENSMUSG00000001552	Jup	5.83937	6.05291	5.81866	5.84915	5.92906	6.02929	5.72958	5.7056	5.61868	5.64163	5.45166	5.67749	6.03394	5.72764	5.77914	5.81533	5.8754	5.89064	5.87707	5.92048	5.82822	5.75227	5.78185	5.90744	6.23419	6.26246	6.24997	6.36623	6.29707	6.19663	7.39335	7.15106	7.38342	7.35259	7.43289	7.36897	5.90364	5.93583	5.68462	5.59026	5.88079	5.82329	5.87526	5.81385	6.24887	6.28664	7.30927	7.38481
ENSMUSG00000001569	Nom1	6.88858	6.79562	6.91819	6.92599	6.84347	6.84393	6.55727	6.61534	6.70776	6.59859	6.91412	6.7198	6.3829	6.55814	6.45683	6.48432	6.52119	6.40686	6.50225	6.51621	6.53548	6.53673	6.36092	6.41503	7.05968	6.9548	7.08503	7.14136	6.94184	6.97431	7.68713	7.6874	7.77141	7.80979	7.70894	7.91064	6.86746	6.87113	6.62679	6.74417	6.47052	6.48745	6.51798	6.43756	7.03317	7.01917	7.71532	7.80979
ENSMUSG00000001576	Ergic1	8.52379	8.42454	8.54093	8.45921	8.51597	8.37797	8.15262	8.16034	8.05543	7.81031	8.13587	8.18106	7.89967	8.115	7.98973	8.06878	8.11686	8.16924	8.36329	8.08176	8.25131	8.18155	8.129	8.28219	8.40923	8.18827	8.43918	8.34877	8.30071	8.25835	9.16862	9.36635	9.19523	9.12525	9.09049	9.12599	8.49642	8.45105	8.1228	8.04241	8.00734	8.05846	8.23212	8.19758	8.34556	8.30261	9.2434	9.11391
ENSMUSG00000001627	Ifrd1	5.67799	5.70574	5.71171	5.65333	5.69019	5.71135	5.64202	5.44494	5.52202	5.5149	5.55231	5.31099	5.47645	5.55449	5.56569	5.42301	5.40013	5.42556	5.16923	5.10276	5.13334	5.21545	5.02894	5.21503	5.77897	5.73615	5.71933	5.81789	5.75385	5.71544	6.67699	6.71248	6.70182	6.83339	6.70189	6.78944	5.69848	5.68496	5.53633	5.4594	5.51547	5.46294	5.13511	5.15314	5.74482	5.7624	6.6971	6.77491
ENSMUSG00000001630	Stk38l	4.37156	4.3166	4.4155	4.40004	4.32005	4.42448	4.03353	3.93245	3.91836	3.86102	3.88614	3.88771	4.36317	4.23556	4.34828	4.27127	4.29603	4.26897	3.91664	3.95443	3.93643	3.91629	3.89049	3.99222	4.26027	4.32202	4.38619	4.38636	4.39372	4.31897	5.24837	5.24748	5.21898	5.27724	5.27164	5.29749	4.36789	4.38153	3.96145	3.87829	4.29936	4.3052	3.93584	3.933	4.32283	4.36635	5.23828	5.28212
ENSMUSG00000001632	Brpf1	6.20308	6.14973	6.00538	6.18555	6.18096	6.16532	6.1172	5.85655	5.89412	6.09436	5.67328	5.88895	6.0261	6.12183	6.19903	6.11007	6.10733	5.98159	5.76956	5.88091	5.8234	5.89372	5.88731	5.9395	6.08277	6.19304	5.98035	6.16265	6.04288	6.15418	7.1565	7.36634	7.2856	7.29141	7.40839	7.33807	6.1194	6.17727	5.95596	5.88553	6.07397	6.13881	5.82462	5.90684	6.08539	6.1199	7.26948	7.34596
ENSMUSG00000001642	Akr1b3	2.82277	2.77227	2.80084	2.81644	2.76475	2.76898	1.91794	1.96334	1.94034	1.92556	1.90407	1.95744	2.0957	2.11848	2.11066	2.13339	2.12117	2.08744	NA	NA	NA	NA	NA	NA	2.37665	2.46885	2.39085	2.39877	2.39049	2.44615	3.46312	3.50697	3.53278	3.66214	3.53005	3.50156	2.79863	2.78339	1.94054	1.92902	2.10709	2.12174	NA	NA	2.41212	2.4118	3.50096	3.56459
ENSMUSG00000001663	Gstt1	2.43497	2.36919	2.45076	2.38775	2.45948	2.36742	2.30517	2.36684	2.35818	2.3076	2.40195	2.39759	2.35694	2.38397	2.36964	2.39975	2.39491	2.36567	2.69727	2.76222	2.70226	2.70171	2.75206	2.79059	2.93827	2.92087	2.90869	2.86586	2.87557	2.86757	3.35459	3.25097	3.34106	3.25387	3.20954	3.25083	2.41831	2.40488	2.3434	2.36905	2.37045	2.3881	2.72058	2.74812	2.92261	2.86967	3.31554	3.23808
ENSMUSG00000001666	Ddt	4.12912	4.08772	4.05028	4.12935	4.10558	4.10505	4.01575	3.96991	3.91351	3.87909	4.09537	3.95048	3.97732	4.01649	3.99371	4.11676	3.98797	3.99092	4.09787	4.02426	4.03351	3.98064	4.13791	3.99794	3.83089	3.89383	3.93636	3.84055	3.90582	3.888	4.8982	5.11697	5.08577	4.92071	4.96179	4.9833	4.08904	4.11332	3.96639	3.97498	3.99691	4.03282	4.05188	4.03883	3.88703	3.87813	5.03365	4.95526
ENSMUSG00000001674	Ddx18	3.95972	3.98733	3.97642	3.9353	4.03883	4.02981	4.25919	4.21319	4.24141	4.30419	4.2178	4.28637	3.6514	3.76404	3.65115	3.6735	3.6724	3.6699	3.69775	3.73618	3.6802	3.67179	3.71465	3.75389	4.44706	4.34067	4.4978	4.47822	4.50505	4.50829	5.15459	5.20594	5.12801	5.13691	5.26376	5.12948	3.97449	4.00131	4.23793	4.26945	3.70772	3.66568	3.70471	3.71344	4.42851	4.49719	5.16285	5.17672
ENSMUSG00000001687	Ubl3	8.45479	8.33183	8.16051	8.43571	8.40285	8.17062	7.90699	7.96061	7.8804	8.0246	7.80121	7.81848	8.00241	7.92731	7.89888	7.75502	7.91788	7.99976	7.91565	7.81176	7.84873	7.88045	7.91558	7.98678	8.20108	8.02388	8.07258	8.22201	8.28381	8.17587	9.02735	9.13844	8.89685	8.96426	8.96973	9.04891	8.31571	8.3364	7.916	7.88143	7.96486	7.85726	7.85871	7.9276	8.09918	8.22723	9.02088	8.9943
ENSMUSG00000001707	Eef1e1	6.35251	6.54292	6.41362	6.43204	6.49449	6.47779	6.31313	6.32722	6.22573	6.27693	6.07767	6.25605	5.83519	5.88954	5.8825	5.90349	5.93181	5.98263	5.87439	5.82045	5.99378	5.89543	5.86408	6.00731	6.62945	6.56722	6.50272	6.36361	6.48634	6.64512	7.53837	7.506	7.45604	7.62453	7.49487	7.47549	6.43635	6.46811	6.28869	6.20355	5.86237	5.90593	5.89621	5.92227	6.56646	6.49836	7.50014	7.53163
ENSMUSG00000001729	Akt1	6.78447	6.61333	6.32635	6.51259	6.55602	6.44767	5.78196	5.93003	5.894	5.78396	5.8512	5.71586	6.67628	6.31782	6.33213	6.41875	6.34286	6.51139	6.417	6.34402	6.37803	6.51369	6.56734	6.64339	6.57266	6.44547	6.34329	6.64666	6.46791	6.44053	7.37763	7.44944	7.49311	7.36816	7.27264	7.32756	6.57472	6.50542	5.86866	5.78367	6.49705	6.36458	6.37968	6.57481	6.45381	6.51837	7.44006	7.32279
ENSMUSG00000001741	Il16	4.06313	4.08175	4.07665	4.08094	4.047	4.03859	3.44026	3.45516	3.42686	3.35077	3.31109	3.37769	4.34439	4.3272	4.38708	4.28012	4.46567	4.30877	4.80135	4.72626	4.80104	4.8076	4.86217	4.70174	4.83283	4.989	4.86073	4.90344	5.01676	5.00526	6.13962	6.12023	6.38565	6.31957	6.23852	6.16524	4.07384	4.05551	3.44076	3.34652	4.33579	4.37762	4.77622	4.7905	4.89419	4.97515	6.21517	6.24111
ENSMUSG00000001750	Tcirg1	NA	NA	NA	NA	NA	NA	NA	NA	NA	NA	NA	NA	NA	NA	NA	NA	NA	NA	NA	NA	NA	NA	NA	NA	NA	NA	NA	NA	NA	NA	1.85807	1.91071	1.89641	1.87623	1.90354	1.88552	NA	NA	NA	NA	NA	NA	NA	NA	NA	NA	1.8884	1.88843
ENSMUSG00000001751	Naglu	3.45632	3.48543	3.4947	3.55863	3.52597	3.49811	2.8895	2.89932	2.92486	2.82278	2.88847	2.91748	3.11397	3.12069	3.0773	3.17985	3.14075	3.14898	3.64099	3.60886	3.67653	3.64059	3.74657	3.66374	3.42899	3.50465	3.46242	3.53107	3.55604	3.44127	4.54063	4.58237	4.583	4.52754	4.56007	4.62734	3.47882	3.52757	2.90456	2.87624	3.11733	3.13263	3.64212	3.68363	3.46535	3.50946	4.56867	4.57165
ENSMUSG00000001755	Coasy	5.51927	5.43282	5.42981	5.50221	5.50865	5.38093	5.35357	5.23606	5.19355	5.14946	5.1362	5.24614	5.26808	5.3316	5.24364	5.25754	5.25454	5.25699	5.22534	5.35997	5.26861	5.27349	5.1876	5.31638	5.57624	5.6114	5.65783	5.65452	5.66961	5.67818	6.43745	6.4236	6.54597	6.40513	6.42167	6.37382	5.46064	5.46393	5.26106	5.17726	5.29984	5.25191	5.28464	5.25916	5.61516	5.66744	6.469	6.40021
ENSMUSG00000001763	Tspan33	5.29577	5.36156	5.26572	5.35084	5.35248	5.42358	5.00154	5.10032	5.01506	4.92096	5.188	5.08776	4.97127	5.06478	5.05894	4.97077	4.98625	5.01871	5.48211	5.3688	5.54399	5.37	5.46032	5.50821	5.97586	5.88937	5.91559	5.93518	5.9263	5.87584	6.79271	6.86675	6.74713	6.51436	6.53799	6.56167	5.30768	5.37563	5.03897	5.06557	5.01803	5.00532	5.46497	5.44618	5.92694	5.91244	6.8022	6.53801
ENSMUSG00000001767	Crnkl1	7.35576	7.4696	7.46899	7.44027	7.42978	7.49038	7.13497	7.16901	7.25775	7.32667	7.0607	7.07695	7.22615	7.15879	7.23795	7.12877	7.16179	7.15371	6.9299	7.22464	7.07841	7.07893	7.05094	6.97202	7.57575	7.59982	7.56472	7.61004	7.46561	7.65178	8.52422	8.33507	8.3587	8.43042	8.39293	8.47142	7.43145	7.45348	7.18724	7.15477	7.19247	7.17617	7.07765	7.03396	7.5801	7.57581	8.406	8.43159
ENSMUSG00000001768	Rin2	4.74376	4.6958	4.6929	4.68279	4.54659	4.66763	4.33912	4.29198	4.47456	4.40076	4.26177	4.41227	4.89731	4.88518	5.00745	4.91679	4.94986	4.81329	4.83712	4.69125	4.62166	4.80936	4.65396	4.57774	5.2029	5.1226	5.08486	5.16603	5.17913	5.35378	6.45448	6.57046	6.52727	6.75342	6.6323	6.92908	4.71082	4.63234	4.36855	4.35827	4.89125	4.95803	4.71668	4.68036	5.13679	5.23298	6.5174	6.7716
ENSMUSG00000001773	Folh1	3.35284	3.3716	3.47122	3.33706	3.37108	3.3756	2.51128	2.60025	2.52417	2.51068	2.57962	2.50947	2.08763	2.12615	2.12322	2.09166	2.08065	2.10875	2.16852	2.18378	2.17376	2.20661	2.12604	2.15503	2.9829	2.99505	2.89261	2.95801	2.94771	2.9881	3.6939	3.8352	3.69707	3.6961	3.70231	3.6943	3.39855	3.36125	2.54523	2.53326	2.10689	2.09851	2.17535	2.16256	2.95685	2.96461	3.74205	3.69757
ENSMUSG00000001774	Chordc1	8.49424	8.43989	8.66411	8.31986	8.41812	8.63188	8.45624	8.42107	8.62221	9.14924	8.49432	8.37397	8.06694	8.0275	8.09464	8.05042	8.08417	8.24588	8.10484	8.0553	8.12813	7.84088	7.88494	7.88813	9.00873	9.0243	8.85441	8.90072	8.99989	9.08412	9.97535	9.62769	9.5541	9.57149	9.64047	9.43261	8.53275	8.45662	8.49984	8.67251	8.04722	8.07641	8.09609	7.87132	8.96248	8.99491	9.71904	9.54819
ENSMUSG00000001783	Rtcb	8.43847	8.56047	8.57629	8.49621	8.48891	8.47505	8.20555	8.11001	8.12786	7.95237	8.08351	8.10701	8.30384	8.13118	8.29606	8.21626	8.21768	8.29157	8.00733	8.15619	8.12918	8.24013	8.15896	8.2491	8.67842	8.71815	8.64159	8.68039	8.56297	8.68035	9.51703	9.47911	9.61491	9.63689	9.49243	9.58726	8.52507	8.48672	8.14781	8.04763	8.21751	8.24333	8.09757	8.21606	8.67939	8.64124	9.53702	9.57219
ENSMUSG00000001785	Pwp1	6.26068	6.43107	6.31835	6.33799	6.38605	6.43893	5.80733	5.7253	5.84924	5.94583	5.44526	5.7956	5.98931	6.04218	6.19686	6.1129	6.09506	6.08883	6.06412	5.98085	6.03775	5.83021	5.756	5.87181	6.56946	6.59959	6.58722	6.58579	6.50561	6.63672	7.5454	7.63922	7.49576	7.54636	7.59803	7.65859	6.3367	6.38766	5.79396	5.7289	6.01574	6.13494	6.02757	5.81934	6.58542	6.57604	7.56012	7.60099
ENSMUSG00000001786	Fbxo7	5.99371	5.92239	5.88345	5.85146	5.82923	5.90101	5.76261	5.85812	5.82685	5.87746	6.01247	5.92685	5.57241	5.62019	5.5751	5.58924	5.52175	5.49327	5.65995	5.68699	5.80016	5.7328	5.71079	5.54401	6.22209	6.02671	6.20617	6.11423	6.1248	6.09056	6.91145	6.9367	6.92343	6.96318	6.95759	6.99254	5.93318	5.86057	5.81586	5.93893	5.5963	5.56203	5.7157	5.66254	6.15166	6.10986	6.92386	6.9711
ENSMUSG00000001794	Capns1	8.31811	8.07799	8.0162	8.087	8.14722	8.00651	7.70159	7.76796	7.51733	7.68914	7.84904	7.69526	8.05658	7.78425	7.76875	7.77961	7.5547	7.94604	8.19771	7.7148	8.11285	8.01287	7.95516	8.04842	8.14753	8.00806	8.1168	8.11739	8.21007	7.83757	9.19604	9.17998	9.07756	8.98127	8.89512	9.09933	8.13743	8.08024	7.66229	7.74448	7.92041	7.70102	8.00845	8.00549	8.0908	8.05501	9.1512	8.9919
ENSMUSG00000001802	Lrp3	5.97243	5.86547	5.85577	5.7306	5.77846	5.69819	5.3197	5.13038	5.18265	5.0799	5.11249	5.14054	5.39455	5.4477	5.39949	5.4146	5.37844	5.39401	5.40227	5.2715	5.27913	5.37077	5.43805	5.43888	5.31361	5.51834	5.24081	5.21298	5.1756	5.35375	6.726	6.59026	6.5764	6.52369	6.55048	6.51504	5.89789	5.73575	5.21091	5.11098	5.42112	5.39751	5.31763	5.4159	5.35759	5.24744	6.63089	6.52974
ENSMUSG00000001829	Clpb	7.37131	7.17538	7.2987	7.19677	7.19728	7.26801	7.05404	6.93609	6.95851	7.09911	7.18816	6.83676	7.14134	7.07487	6.98899	7.03561	6.94062	7.00741	7.07121	7.08057	7.05582	7.06597	7.07239	7.05274	7.33789	7.46919	7.45515	7.3999	7.43336	7.28592	8.3292	8.31256	8.28293	8.26537	8.11499	8.24554	7.2818	7.22069	6.98288	7.04135	7.10811	6.98841	7.0692	7.0637	7.42074	7.37306	8.30823	8.20863
ENSMUSG00000001833	2007-09-01	11.0211	11.2191	11.3252	11.1761	11.2152	11.5485	11.1012	11.2509	11.3459	11.2253	11.3413	11.2751	10.7622	10.8713	10.97	10.8262	10.931	10.8974	10.6372	10.8826	10.619	10.6119	10.5569	10.4951	11.5269	11.5099	11.5617	11.4147	11.4338	11.6827	12.3478	11.8419	12.1293	12.2435	12.1073	12.0082	11.1885	11.3133	11.2327	11.2806	10.8167	10.9091	10.7129	10.5546	11.5328	11.5104	12.1064	12.1196
ENSMUSG00000001844	Zdhhc4	3.80238	3.79854	3.81294	3.90232	3.86457	3.78319	2.86623	2.9638	3.06578	2.92769	2.91376	2.94174	3.305	3.3514	3.26545	3.34255	3.37969	3.33631	3.66918	3.65744	3.62846	3.64042	3.70202	3.67792	3.81446	3.78167	3.75402	3.93058	3.83732	3.85447	4.45108	4.4096	4.45656	4.46101	4.46535	4.43408	3.80462	3.85003	2.96527	2.92773	3.3282	3.32923	3.65169	3.67345	3.78338	3.87412	4.43908	4.45348
ENSMUSG00000001847	Rac1	9.56672	9.53474	9.37441	9.57746	9.51391	9.38736	9.17678	9.12687	8.9633	8.88151	9.08941	8.99986	9.11803	9.27897	9.12004	9.08295	9.18221	9.22995	9.20866	9.13454	9.09917	9.27994	9.26612	9.13725	9.51242	9.72653	9.65123	9.76306	9.61871	9.60047	10.4319	10.454	10.457	10.633	10.5656	10.5219	9.49196	9.49291	9.08898	8.99026	9.1985	9.1284	9.14746	9.22777	9.63006	9.66075	10.4476	10.5735
ENSMUSG00000001855	Nup214	6.90975	6.96743	6.93925	7.14382	7.08235	6.91616	6.51499	6.54928	6.63579	6.34794	6.54873	6.55479	6.85441	6.74836	6.86545	6.77416	6.86341	6.64553	6.52642	6.92306	6.48326	6.7507	6.83869	6.86929	7.11504	7.32808	7.15184	7.2034	7.08287	7.35154	8.02944	8.01559	8.16951	8.22032	8.33164	8.24042	6.93881	7.04744	6.56669	6.48382	6.80138	6.83434	6.64425	6.81956	7.19832	7.2126	8.07151	8.26413
ENSMUSG00000001891	Ugp2	7.89329	7.93233	8.13016	7.94667	7.99942	8.00692	7.61812	7.63258	7.84828	7.62653	7.49916	7.72652	7.48444	7.57132	7.53965	7.55289	7.51298	7.4537	7.22243	7.4983	7.33859	7.31455	7.33359	7.22988	8.05678	8.15521	8.20292	7.99839	8.00744	8.18185	8.9434	8.83097	8.73694	8.71388	8.9012	8.75116	7.98526	7.98434	7.69966	7.61741	7.52788	7.53518	7.3531	7.29267	8.1383	8.06256	8.8371	8.78875
ENSMUSG00000001901	Kcnh6	NA	NA	NA	NA	NA	NA	NA	NA	NA	NA	NA	NA	NA	NA	NA	NA	NA	NA	NA	NA	NA	NA	NA	NA	NA	NA	NA	NA	NA	NA	2.15873	2.15351	2.16963	2.09264	2.13066	2.11761	NA	NA	NA	NA	NA	NA	NA	NA	NA	NA	2.16062	2.11364
ENSMUSG00000001909	Trmt1	5.9767	5.92377	5.88678	5.96543	5.89012	5.85375	5.46891	5.44103	5.40104	5.33787	5.62713	5.46515	5.63937	5.67059	5.62701	5.6038	5.66388	5.57435	5.60191	5.54016	5.5399	5.54663	5.65365	5.53822	5.65791	5.71077	5.59468	5.75432	5.59188	5.72226	6.44853	6.64107	6.55233	6.5051	6.53564	6.58344	5.92909	5.9031	5.43699	5.47672	5.65498	5.63156	5.56066	5.5795	5.65446	5.68949	6.54731	6.54139
ENSMUSG00000001910	Nacc1	6.87865	6.88831	6.86935	6.89111	6.88392	6.82398	6.39254	6.3133	6.26943	6.18353	6.46988	6.22002	6.84982	6.79099	6.69226	6.88083	6.69996	6.72035	6.55408	6.5574	6.45699	6.60512	6.66254	6.58814	6.91965	7.02968	6.80856	6.91595	6.96551	6.84712	7.89018	7.78813	7.87298	7.91689	8.01132	7.90719	6.87877	6.86634	6.32509	6.29115	6.8204	6.75768	6.52282	6.6186	6.9193	6.90953	7.85043	7.94513
ENSMUSG00000001911	Nfix	9.62962	9.57036	9.58803	9.55465	9.59408	9.44361	9.21589	9.20324	9.25145	8.94148	9.38175	9.34501	9.27419	9.23003	9.2108	9.24677	9.26229	9.23429	9.19963	9.29178	9.13262	9.25187	9.23509	9.20266	9.7737	9.76198	9.72269	9.67234	9.66478	9.69729	10.5934	10.4506	10.6923	10.5436	10.6344	10.5115	9.596	9.53078	9.22353	9.22275	9.25211	9.23995	9.20801	9.22987	9.75279	9.67814	10.5788	10.5631
ENSMUSG00000001924	Uba1	11.0294	11.1322	11.0338	11.1753	11.1125	10.9943	10.7063	10.7078	10.7248	10.6226	10.8394	10.6513	10.8568	10.8205	10.8534	10.8167	10.8593	10.8522	10.6617	10.7742	10.6485	10.8461	10.899	10.8192	11.2424	11.5131	11.329	11.2946	11.2596	11.3788	12.1595	12.1423	12.2404	12.2788	12.2465	12.3041	11.0651	11.094	10.713	10.7045	10.8387	10.8431	10.6948	10.8548	11.3615	11.311	12.1807	12.2765
ENSMUSG00000001942	Siae	5.7432	5.72414	5.76435	5.71688	5.72232	5.79158	5.4103	5.40895	5.46573	5.40738	5.41174	5.51751	5.10243	5.22772	5.19206	5.25568	5.18377	5.20507	5.40362	5.21236	5.38509	5.32624	5.34527	5.37314	5.98633	5.92516	5.93936	6.04166	6.1302	5.93463	6.76032	6.788	6.71139	6.68334	6.7002	6.75639	5.74389	5.74359	5.42833	5.44554	5.16508	5.2105	5.33369	5.34822	5.95029	6.0355	6.75324	6.71331
ENSMUSG00000001943	Vsig2	NA	NA	NA	NA	NA	NA	NA	NA	NA	NA	NA	NA	NA	NA	NA	NA	NA	NA	NA	NA	NA	NA	NA	NA	1.6358	1.62766	1.58243	1.57729	1.57104	1.61982	1.84673	1.79075	1.85834	1.82291	1.78034	1.80566	NA	NA	NA	NA	NA	NA	NA	NA	1.6153	1.58938	1.83194	1.80297
ENSMUSG00000001946	Esam	2.43816	2.44228	2.47606	2.46845	2.4544	2.44934	2.65102	2.60653	2.64516	2.69106	2.73835	2.69595	2.1257	2.16418	2.11503	2.1652	2.08627	2.10187	1.88426	1.90136	1.89088	1.92077	1.92086	1.92763	2.6175	2.59894	2.57228	2.61206	2.59409	2.61033	3.94696	3.91068	4.04771	3.9999	3.99504	3.99026	2.45217	2.4574	2.63424	2.70845	2.14494	2.12217	1.89217	1.92309	2.59624	2.60549	3.96845	3.99507
ENSMUSG00000001948	Spa17	2.8608	2.82238	2.85169	2.84759	2.81457	2.86654	3.19761	3.23768	3.14584	3.10527	3.23054	3.22065	2.99433	3.0627	3.03493	2.99568	3.03044	3.00855	2.2247	2.23979	2.27943	2.21745	2.21504	2.18569	3.65259	3.59517	3.61793	3.5767	3.58604	3.56352	3.86694	3.96682	3.94495	3.92809	3.94391	3.85827	2.84496	2.8429	3.19371	3.18549	3.02852	3.02035	2.24797	2.20606	3.6219	3.57542	3.92624	3.91009
ENSMUSG00000001962	Fam50a	6.5438	6.58562	6.72691	6.64795	6.54183	6.67633	6.30663	6.33086	6.19059	6.15165	6.19562	6.23835	6.23672	6.33815	6.18998	6.10777	6.22339	6.35058	6.472	6.18387	6.21936	6.30952	6.27151	6.26672	6.51909	6.51159	6.54351	6.63257	6.53911	6.54973	7.44962	7.22245	7.43186	7.47699	7.39479	7.48612	6.61878	6.62204	6.27603	6.19521	6.28744	6.17371	6.29174	6.28258	6.52473	6.57381	7.36798	7.45263
ENSMUSG00000001964	Emd	7.20657	7.29442	7.21688	7.29145	7.29803	7.2066	7.00665	6.93481	6.99918	7.12017	6.92953	7.05834	7.01705	7.01596	6.9829	6.94287	7.07278	6.89008	6.74656	6.78263	6.73096	6.74381	6.84177	6.80797	7.20455	7.37731	7.49114	7.32387	7.25347	7.36605	8.14663	8.08138	8.14647	8.20565	8.17909	8.11175	7.23929	7.26536	6.98021	7.03601	7.01651	6.99952	6.75338	6.79785	7.35767	7.31446	8.12483	8.1655
ENSMUSG00000001983	Taco1	6.0952	6.03406	6.13974	5.96282	5.97002	6.08632	5.93211	5.72708	5.86548	5.88252	5.99948	5.74954	5.74443	5.72879	5.79746	5.77142	5.7375	5.78285	5.59766	5.59439	5.53437	5.48051	5.4013	5.53706	6.41414	6.41525	6.29695	6.3484	6.40111	6.43648	7.40883	7.2677	7.38734	7.495	7.5681	7.2736	6.08967	6.00639	5.84156	5.87718	5.73661	5.76879	5.57547	5.47296	6.37545	6.39533	7.35462	7.44557
ENSMUSG00000001985	Grik3	5.54625	5.5664	5.59976	5.52742	5.57496	5.58088	5.65642	5.44012	5.61951	5.72236	5.66819	5.76288	5.53839	5.42234	5.56557	5.60932	5.59861	5.56316	5.99888	5.99365	5.90554	5.96296	6.00775	6.05007	6.16668	6.08367	5.96633	5.91097	5.99166	6.06134	6.7983	6.57646	6.913	6.72106	6.5399	6.6904	5.5708	5.56109	5.57201	5.71781	5.48037	5.59117	5.96602	6.00693	6.07223	5.98799	6.76258	6.65045
ENSMUSG00000001986	Gria3	11.1913	11.0498	11.1909	11.1166	11.1015	11.0952	10.7672	10.7951	10.8051	10.8012	10.9724	10.6409	10.6127	10.6452	10.6311	10.5606	10.5818	10.6504	10.5408	10.4324	10.6581	10.4808	10.4127	10.4601	11.1755	10.9034	11.046	11.025	11.0721	11.01	11.8853	11.8595	11.7709	11.7086	11.5953	11.7466	11.144	11.1044	10.7892	10.8048	10.6289	10.5912	10.5438	10.4512	11.0416	11.0357	11.8385	11.6835
ENSMUSG00000001995	Sipa1l2	6.75875	6.6289	6.67592	6.75694	6.7392	6.58234	5.9904	6.09082	6.22705	6.31109	5.89852	6.05293	6.36253	6.39676	6.46704	6.25999	6.41479	6.31812	6.68969	6.63745	6.49256	6.53055	6.8618	6.52268	6.78539	6.98281	6.68528	6.87463	6.91959	6.78346	7.8987	7.92495	8.11758	8.27324	8.26953	8.299	6.68786	6.69283	6.10275	6.08751	6.37964	6.38061	6.60657	6.63834	6.81783	6.85923	7.98041	8.28059
ENSMUSG00000001998	Ap4e1	4.6359	4.62012	4.72772	4.72796	4.70242	4.66693	4.63152	4.52822	4.69273	4.7203	4.75422	4.58689	4.3819	4.45041	4.50661	4.491	4.40513	4.40313	4.31856	4.43943	4.36324	4.37129	4.3836	4.44295	5.23728	5.23726	5.15696	5.20061	5.10129	5.24894	5.91885	5.77012	5.85863	5.98471	5.91384	5.88342	4.66125	4.6991	4.61749	4.68713	4.41615	4.46758	4.37374	4.39928	5.2105	5.18361	5.8492	5.92732
ENSMUSG00000001999	Blvra	6.03211	5.92439	5.87447	6.01893	5.91156	6.0034	5.63751	5.66181	5.79581	5.67206	5.45853	5.83798	5.77374	5.60026	5.63778	5.80243	5.72319	5.81533	5.45747	5.55868	5.53806	5.53949	5.48885	5.64943	6.07371	5.94953	6.00519	5.87019	5.89492	6.06369	6.86115	6.77343	6.97524	7.03288	7.01537	6.79069	5.94366	5.97796	5.69837	5.65619	5.687	5.72113	5.51807	5.55926	6.00948	5.94293	6.86994	6.94631
ENSMUSG00000002006	Pdzd4	6.77126	6.77162	6.53566	6.81831	6.84422	6.63617	6.54085	6.07674	6.33278	6.19459	6.04168	6.00421	6.51187	6.65599	6.35617	6.43729	6.46264	6.62538	6.1413	6.19013	6.14823	6.2416	6.32006	6.34675	6.58633	6.4878	6.56819	6.6972	6.52842	6.49348	7.45977	7.38874	7.34092	7.57211	7.46509	7.4985	6.69285	6.76623	6.31679	6.08016	6.58393	6.4187	6.15989	6.3028	6.54744	6.57303	7.39648	7.5119
ENSMUSG00000002010	Idh3g	9.20003	9.32362	9.40829	9.20051	9.24858	9.41537	8.86722	9.08837	8.99984	8.85517	9.00022	9.17369	9.0506	8.83425	8.96865	8.94567	8.86986	9.06063	8.99768	8.96734	8.94275	8.92727	8.90094	8.90385	9.50957	9.53581	9.51831	9.44745	9.43589	9.481	10.3537	10.1733	10.3246	10.2237	10.2241	10.1964	9.31065	9.28815	8.98514	9.00969	8.94242	8.92806	8.96925	8.91069	9.52123	9.45478	10.2839	10.2147
ENSMUSG00000002012	Pnck	7.05595	7.2236	7.13002	7.13776	7.21559	7.06109	6.88091	7.08776	6.83895	6.91924	6.82686	6.99242	7.02868	7.06085	6.98344	7.0427	7.06972	6.99763	7.14526	7.16022	7.12426	7.04773	7.30873	7.11053	7.46776	7.62119	7.76094	7.5564	7.60366	7.5322	8.36066	8.4915	8.62202	8.31488	8.05955	8.23259	7.13652	7.13814	6.93588	6.91284	7.04477	7.03195	7.14325	7.15566	7.61663	7.56408	8.49139	8.20234
ENSMUSG00000002014	Ssr4	7.42721	7.42008	7.4815	7.63276	7.58302	7.66562	7.63749	7.62149	7.50682	7.71197	7.72491	7.47443	7.32028	7.28216	7.3006	7.34361	7.30087	7.28802	7.33259	7.35656	7.31461	7.1738	7.23201	7.03696	7.61685	7.7215	7.74336	7.61349	7.68769	7.6989	8.60423	8.54291	8.60287	8.71068	8.4815	8.56878	7.44293	7.62713	7.5886	7.6371	7.30122	7.31503	7.33459	7.14759	7.6939	7.66669	8.58334	8.58698
ENSMUSG00000002015	Bcap31	7.93123	7.7745	7.89942	7.71887	7.80779	7.81555	7.83702	7.81325	7.828	7.97912	7.97346	7.90703	7.5372	7.47682	7.53544	7.60085	7.56277	7.58061	7.53231	7.58428	7.64819	7.47255	7.57224	7.55818	8.05007	7.96167	8.116	7.88117	7.89699	8.02869	8.89261	8.79884	8.80688	8.7105	8.70417	8.60787	7.86838	7.78074	7.82609	7.9532	7.50701	7.56635	7.58826	7.53432	8.04258	7.93562	8.83278	8.67418
ENSMUSG00000002017	Fam98a	6.30786	6.18543	6.177	6.15584	6.24852	6.28612	5.79735	5.84384	5.92857	5.91592	6.1095	5.98532	5.85849	5.80245	5.81222	5.80769	5.7904	5.83869	5.92027	5.84549	5.81945	5.78735	5.90854	5.8233	6.14849	6.21113	6.2469	6.3382	6.27494	6.30281	7.04918	7.01813	7.08936	7.23034	7.1619	7.16666	6.22343	6.23016	5.85658	6.00358	5.83047	5.80344	5.86174	5.83973	6.20218	6.30532	7.05222	7.1863
ENSMUSG00000002028	Kmt2a	8.21768	8.25026	8.17174	8.06852	8.17389	8.04015	7.94091	7.70299	7.70867	7.93711	7.82324	7.58025	7.69531	7.83359	7.80851	7.78844	7.8537	7.91363	7.63062	7.75367	7.50522	7.7739	7.60255	7.80221	8.33334	8.31171	8.18005	8.35562	8.15567	8.23459	9.29268	8.95059	9.15998	9.20166	9.07564	9.17227	8.21322	8.09418	7.78419	7.7802	7.76445	7.81688	7.62984	7.72622	8.27503	8.24863	9.13442	9.14986
ENSMUSG00000002031	Ift46	6.72517	6.65971	6.69389	6.58253	6.61277	6.78334	6.40845	6.32348	6.31674	6.57661	6.52863	6.5029	6.31149	6.32554	6.25331	6.40705	6.23714	6.35027	6.29922	6.32665	6.33174	6.31793	6.37543	6.387	6.64205	6.50248	6.68246	6.45105	6.52741	6.54557	7.40761	7.53167	7.47556	7.30816	7.32817	7.38982	6.69292	6.65955	6.34956	6.53605	6.31852	6.29917	6.3192	6.36012	6.60899	6.50801	7.47161	7.34205
ENSMUSG00000002032	Tmem25	6.73366	6.51479	6.4753	6.45676	6.47354	6.58554	5.98503	6.09359	6.07447	6.01355	5.9041	6.16826	6.17428	6.16705	6.21993	6.15262	6.25279	6.23269	6.3841	6.25329	6.40607	6.32393	6.2425	6.48449	6.6387	6.47818	6.48544	6.58842	6.52337	6.4907	7.39148	7.42586	7.5092	7.2069	7.23222	7.1931	6.57458	6.50528	6.05103	6.02864	6.17066	6.20845	6.34782	6.35031	6.53411	6.53416	7.44218	7.21074
ENSMUSG00000002043	Trappc6a	2.5135	2.47761	2.46926	2.47447	2.48706	2.46496	2.6661	2.62992	2.62928	2.61664	2.60078	2.58775	2.5946	2.69213	2.62519	2.59216	2.61334	2.61982	2.68916	2.70463	2.7251	2.69363	2.79178	2.75408	2.62622	2.59328	2.65051	2.64644	2.63917	2.66382	3.7826	3.8691	3.79618	3.83786	3.85432	3.82115	2.48679	2.4755	2.64177	2.60172	2.64336	2.61023	2.7063	2.7465	2.62334	2.64981	3.81596	3.83778
ENSMUSG00000002052	Supt6	9.87558	9.91365	9.79451	9.86628	9.87171	9.63263	9.42349	9.36624	9.26623	9.32301	9.3463	9.04385	9.60204	9.56312	9.47714	9.42023	9.5153	9.54586	9.22806	9.36803	9.19067	9.58486	9.42631	9.51292	9.70175	9.8988	9.65565	9.81189	9.66885	9.75801	10.5258	10.4467	10.463	10.6597	10.6908	10.7295	9.86125	9.7902	9.35199	9.23772	9.58258	9.47089	9.26225	9.50803	9.75207	9.74625	10.4785	10.6933
ENSMUSG00000002055	Spag5	2.09094	2.06178	2.05235	2.06924	2.05472	2.08849	2.00407	1.98541	2.00775	1.96722	1.94565	1.95548	2.48285	2.43901	2.46998	2.42703	2.48323	2.46459	2.40159	2.39003	2.41041	2.35441	2.40983	2.40197	2.96987	3.0159	2.96844	2.99352	2.9568	2.98863	3.76792	3.70013	3.67618	3.71467	3.6771	3.71136	2.06836	2.07082	1.99908	1.95611	2.46093	2.46008	2.40068	2.38873	2.98473	2.97965	3.71475	3.70104
ENSMUSG00000002058	Unc119	4.64912	4.52585	4.43596	4.54639	4.49593	4.51515	3.86856	3.93178	3.91481	3.91498	3.81113	3.95361	4.09861	4.0454	4.025	4.02777	4.03935	3.99389	4.42497	4.36586	4.51823	4.40997	4.42354	4.44958	4.51695	4.61532	4.62441	4.63801	4.55679	4.64207	5.2873	5.28377	5.49962	5.30907	5.333	5.26842	4.53697	4.51916	3.90505	3.89324	4.07201	4.0307	4.43635	4.4277	4.58556	4.61229	5.3569	5.3035
ENSMUSG00000002059	Rab34	3.27475	3.20915	3.17163	3.30242	3.31518	3.19597	3.52351	3.46883	3.49775	3.40533	3.53467	3.46261	3.34933	3.28561	3.26634	3.28093	3.30663	3.30801	2.54697	2.60413	2.58417	2.5526	2.60169	2.57497	2.88447	2.95723	2.97924	2.97549	2.91274	2.97661	4.28479	4.33642	4.28996	4.31076	4.40003	4.35662	3.21851	3.27119	3.49669	3.46754	3.31747	3.28463	2.57842	2.57642	2.94031	2.95495	4.30372	4.3558
ENSMUSG00000002064	Sdf2	7.67107	7.67087	7.77183	7.65501	7.67549	7.72994	7.58526	7.56823	7.55679	7.59735	7.33544	7.60309	7.48658	7.44737	7.44071	7.433	7.3893	7.43465	7.389	7.23406	7.57334	7.41252	7.27979	7.37398	7.93851	7.68078	7.82841	7.81751	7.88171	7.76969	8.75361	8.8579	8.67096	8.61063	8.574	8.76605	7.70459	7.68681	7.57009	7.51196	7.46698	7.421	7.3988	7.35543	7.8159	7.82297	8.76082	8.65023
ENSMUSG00000002068	Ccne1	6.11193	6.10321	5.99417	6.10131	5.99124	6.12952	5.70117	5.74596	5.79143	5.76728	5.66304	5.85403	5.66673	5.60091	5.66727	5.70442	5.8049	5.71256	5.60546	5.61866	5.73623	5.65133	5.68832	5.65798	6.19407	6.23092	6.28553	6.2052	6.11857	6.16777	7.10128	7.09462	6.95115	7.03819	7.25469	7.04447	6.06977	6.07402	5.74619	5.76145	5.63382	5.72553	5.65345	5.66587	6.23684	6.16385	7.04902	7.11245
ENSMUSG00000002083	Bbc3	2.69288	2.78241	2.73268	2.73063	2.69064	2.69249	2.5168	2.45434	2.50386	2.51047	2.52359	2.55954	2.66553	2.7324	2.6648	2.68738	2.74471	2.68023	2.52507	2.53195	2.53191	2.57601	2.5474	2.61314	2.92206	2.93739	2.92903	2.99846	2.91726	2.93981	4.11826	4.15689	4.14581	4.20918	4.25134	4.13294	2.73599	2.70459	2.49167	2.5312	2.69897	2.69896	2.52964	2.57885	2.92949	2.95184	4.14032	4.19782
ENSMUSG00000002102	Psmc3	9.64958	9.69197	9.65132	9.68919	9.66569	9.6538	9.34423	9.33642	9.21883	9.26593	9.30288	9.2735	9.56782	9.45441	9.34393	9.31373	9.32955	9.51947	9.42629	9.29925	9.33661	9.40874	9.43524	9.36602	9.59443	9.74422	9.60995	9.61774	9.70345	9.59777	10.6505	10.5947	10.5906	10.6226	10.5371	10.6829	9.66429	9.66956	9.29983	9.28077	9.51111	9.32907	9.35405	9.40334	9.64953	9.63965	10.6119	10.6142
ENSMUSG00000002103	Acp2	8.01406	8.08558	8.03471	8.01801	7.94497	8.07321	7.61771	7.78947	7.76578	7.88597	7.90895	7.83945	7.62205	7.73316	7.60884	7.67102	7.69511	7.63387	7.6709	7.65098	7.67861	7.75489	7.78989	7.7474	8.19231	8.18542	8.32342	8.30943	8.41605	8.24283	9.08899	9.23245	9.10527	9.01009	8.96775	9.02081	8.04479	8.01206	7.72432	7.87812	7.67761	7.65833	7.66683	7.76406	8.23372	8.32277	9.14224	8.99955
ENSMUSG00000002105	Slc39a13	2.98583	2.88748	2.88566	2.91248	2.90211	2.90325	NA	NA	NA	NA	NA	NA	2.57975	2.62657	2.56491	2.5882	2.58389	2.60929	2.73551	2.74088	2.75075	2.70994	2.74452	2.77661	2.70334	2.60295	2.64651	2.59713	2.63523	2.60966	3.91224	3.85826	3.85826	3.83493	3.85436	3.86412	2.91966	2.90595	NA	NA	2.60316	2.579	2.74238	2.74369	2.65093	2.61401	3.87626	3.85113
ENSMUSG00000002107	Celf2	10.7469	10.8806	10.8686	10.8718	10.8575	10.8468	10.4677	10.5439	10.5891	10.6342	10.3525	10.5367	10.5917	10.5558	10.6172	10.5688	10.4968	10.5278	10.5123	10.5154	10.5684	10.5086	10.505	10.4428	11.0048	11.0862	11.0201	11.0204	11.1253	11.1063	11.928	12.0293	11.9293	12.115	12.0175	12.0588	10.832	10.8587	10.5336	10.5078	10.5738	10.5609	10.5321	10.4855	11.037	11.084	11.9622	12.0637
ENSMUSG00000002108	Nr1h3	NA	NA	NA	NA	NA	NA	NA	NA	NA	NA	NA	NA	NA	NA	NA	NA	NA	NA	NA	NA	NA	NA	NA	NA	NA	NA	NA	NA	NA	NA	1.97059	1.95559	2.0044	1.95362	1.98149	1.94305	NA	NA	NA	NA	NA	NA	NA	NA	NA	NA	1.97686	1.95939
ENSMUSG00000002109	Ddb2	3.79275	3.75257	3.74075	3.77204	3.74911	3.78963	3.56034	3.57676	3.64298	3.64685	3.65101	3.55536	3.49247	3.49062	3.5202	3.48873	3.53424	3.45352	3.09546	3.04317	3.03297	3.13374	3.02973	3.12392	3.78051	3.76905	3.87604	3.73919	3.75619	3.71911	4.76811	4.76893	4.74705	4.67196	4.70431	4.77421	3.76202	3.77026	3.59336	3.61774	3.49154	3.51439	3.0572	3.0958	3.80853	3.73817	4.76136	4.71683
ENSMUSG00000002129	Sf3a1	8.0258	8.0087	8.04306	8.04787	7.94652	7.88822	7.72851	7.55787	7.50438	7.56478	7.54851	7.56106	7.82893	7.63469	7.65388	7.59479	7.5581	7.68146	7.4615	7.62089	7.46021	7.50159	7.46267	7.77512	8.00567	8.12009	7.95985	8.05223	8.09213	7.94756	8.81001	8.90399	8.7617	8.93637	8.82312	8.79952	8.02585	7.96087	7.59692	7.55812	7.73181	7.60226	7.5142	7.57979	8.02854	8.03064	8.82524	8.853
ENSMUSG00000002147	Stat6	3.44483	3.44304	3.50174	3.52752	3.50331	3.44752	3.51827	3.29414	3.32219	3.27142	3.25628	3.36048	3.29036	3.26283	3.24647	3.3537	3.29855	3.34407	3.58272	3.57844	3.49307	3.43484	3.51237	3.53908	3.93384	3.89457	3.93206	3.86615	3.95016	3.88448	4.9601	4.96614	4.98857	5.08344	4.92579	4.91522	3.46321	3.49278	3.3782	3.29606	3.2766	3.29958	3.55141	3.49543	3.92016	3.90027	4.9716	4.97482
ENSMUSG00000002190	Clgn	5.23295	5.19629	5.25573	5.20341	5.28387	5.33487	4.90937	5.14851	5.01927	4.95362	4.91048	4.94602	4.79847	4.80503	4.76719	4.86314	4.81111	4.83888	4.98694	4.80964	4.94233	4.84286	5.00246	4.9363	5.35153	5.29457	5.31075	5.32581	5.24088	5.30604	6.28279	6.00133	6.16728	6.15944	6.24738	6.09559	5.22832	5.27405	5.02572	4.93671	4.80175	4.81382	4.91297	4.92721	5.31895	5.29091	6.15047	6.16747
ENSMUSG00000002205	Vrk3	5.32089	5.2914	5.4166	5.35203	5.30274	5.26867	4.59174	4.68398	4.69305	4.54525	4.6618	4.63139	5.08197	5.01728	5.0709	5.0384	5.03148	4.974	5.05598	5.00348	5.16678	4.97394	5.04353	5.04076	5.06647	5.09051	5.05589	5.15066	5.13922	5.06208	6.12531	6.2635	6.03884	6.03219	6.10777	6.22902	5.34296	5.30781	4.65625	4.61281	5.04962	5.04693	5.07541	5.01941	5.07095	5.11732	6.14255	6.12299
ENSMUSG00000002210	Smg9	5.93057	5.94281	6.04648	5.96204	5.89564	5.93364	5.84802	5.81156	5.80146	5.63058	5.77233	5.8115	5.90335	5.78737	5.73144	5.83164	5.85094	5.81323	5.74302	5.91594	5.74494	5.78027	5.88193	5.91051	6.31188	6.37237	6.42481	6.39592	6.24465	6.25595	7.05429	7.15271	7.13274	7.11006	7.01738	7.00861	5.97329	5.93044	5.82035	5.73814	5.84536	5.80467	5.8013	5.85757	6.36969	6.29884	7.11324	7.04535
ENSMUSG00000002221	Paxip1	6.1139	6.06295	6.07749	6.09592	6.00425	6.02909	5.7212	5.6519	5.69779	5.65948	5.4306	5.50942	5.63288	5.665	5.66511	5.62559	5.74851	5.56822	5.82864	5.8042	5.75096	5.81027	5.87418	5.8447	6.18542	6.25119	6.19118	6.14536	6.1742	6.09096	7.01332	7.01898	7.0633	7.03977	7.09356	7.07991	6.08478	6.04308	5.6903	5.53317	5.64894	5.67974	5.7946	5.84305	6.20926	6.13684	7.03187	7.07108
ENSMUSG00000002222	Rmnd5a	7.63957	7.73273	7.89035	7.71266	7.67958	7.82066	7.45374	7.3597	7.53591	7.60114	7.73605	7.48417	7.33209	7.25395	7.32628	7.27528	7.30786	7.38271	7.14294	7.24303	7.23883	7.23473	7.26656	7.24172	7.80984	7.92758	7.63479	7.64384	7.78805	7.87116	8.70818	8.62234	8.6658	8.63231	8.55103	8.64351	7.75422	7.73763	7.44978	7.60712	7.29302	7.30314	7.20826	7.24767	7.79074	7.76768	8.66544	8.60895
ENSMUSG00000002250	Ppard	3.79479	3.72714	3.72767	3.78275	3.77875	3.8001	3.68743	3.49484	3.46348	3.57338	3.57374	3.52382	3.87152	3.77389	3.74727	3.92744	3.77238	3.75807	3.79207	3.71836	3.64859	3.76367	3.72333	3.86527	3.69856	3.61151	3.60936	3.67495	3.69088	3.65986	4.34989	4.39431	4.47353	4.40219	4.38117	4.2732	3.74987	3.7872	3.54858	3.55698	3.8227	3.8157	3.71967	3.78409	3.63981	3.67523	4.40591	4.35219
ENSMUSG00000002265	Peg3	10.0977	10.1056	10.064	10.0369	10.0237	10.1156	9.85889	9.59306	9.83919	9.94315	9.77178	9.76599	9.57631	9.59867	9.77765	9.68982	9.74249	9.55037	9.40109	9.56963	9.52092	9.48341	9.56149	9.65099	10.1138	10.1863	10.1913	10.1	10.1014	10.1979	10.8875	10.8124	10.8822	10.6281	10.5833	10.5478	10.0891	10.0587	9.76371	9.82697	9.58749	9.73665	9.49721	9.5653	10.1638	10.1331	10.8607	10.5864
ENSMUSG00000002279	Lmf1	4.94949	5.01898	5.0806	5.06286	5.03428	5.02006	4.951	4.96451	4.9386	4.92275	5.00179	5.04744	4.36317	4.24914	4.2592	4.35284	4.3236	4.32632	5.04252	4.89658	4.95999	4.85337	4.92168	4.922	5.12592	5.11259	5.04776	5.09071	5.1886	5.00592	5.86324	5.93575	5.94125	5.86073	5.81628	5.85551	5.01636	5.03907	4.95137	4.99066	4.30615	4.31188	4.96636	4.89902	5.09543	5.09508	5.91341	5.84417
ENSMUSG00000002280	Ciao3	5.76106	5.7822	5.84889	5.77372	5.84494	5.66402	5.77461	5.57727	5.61906	5.47013	5.53961	5.59932	5.73307	5.52204	5.57279	5.64999	5.59933	5.63687	5.5787	5.51905	5.68781	5.65294	5.59218	5.62803	5.86381	5.73554	5.90088	5.91672	5.75833	5.87484	6.95066	7.00631	6.97394	6.9808	6.89103	7.02124	5.79738	5.76089	5.65698	5.53635	5.62755	5.60737	5.59519	5.62438	5.83341	5.84996	6.97697	6.96436
ENSMUSG00000002297	Dbf4	1.71943	1.69544	1.73712	1.73459	1.70229	1.69407	NA	NA	NA	NA	NA	NA	NA	NA	NA	NA	NA	NA	NA	NA	NA	NA	NA	NA	NA	NA	NA	NA	NA	NA	2.13994	2.14739	2.18642	2.18449	2.15809	2.17515	1.71733	1.71032	NA	NA	NA	NA	NA	NA	NA	NA	2.15791	2.17258
ENSMUSG00000002307	Daxx	5.57878	5.5756	5.51341	5.62141	5.63572	5.65318	5.63736	5.41891	5.45754	5.67962	5.47647	5.43915	5.45868	5.44568	5.40648	5.4166	5.39894	5.41608	5.50075	5.54503	5.4779	5.46965	5.38158	5.42095	5.80143	5.65868	5.92319	5.79561	5.91283	5.75292	6.66673	6.70775	6.56403	6.65835	6.73579	6.74807	5.55593	5.63677	5.5046	5.53175	5.45218	5.40734	5.5079	5.42406	5.79443	5.82045	6.64617	6.71407
ENSMUSG00000002308	Cd320	4.5733	4.67955	4.71375	4.63501	4.6272	4.57027	4.87253	4.85568	4.79724	4.81337	4.89095	4.81558	4.59855	4.51847	4.58934	4.51448	4.46298	4.57762	4.67495	4.69091	4.80181	4.68031	4.74541	4.65563	4.93475	4.81507	4.74226	4.67271	4.83926	4.75059	5.91346	5.87302	5.92471	5.68588	5.78532	5.79724	4.65553	4.61083	4.84182	4.83997	4.55851	4.52226	4.72256	4.69378	4.83069	4.75419	5.90373	5.75615
ENSMUSG00000002319	Ipo4	6.1249	6.3827	6.19435	6.29596	6.24226	6.17418	5.86231	5.77481	5.78104	5.60435	5.81014	5.8029	5.90797	5.9238	5.94908	5.96627	5.95084	5.93237	6.05099	5.85732	5.86374	5.94104	6.04684	5.96767	6.27981	6.37749	6.44408	6.45015	6.4861	6.35177	7.13325	7.21262	7.1899	7.11621	7.17083	7.0869	6.23398	6.23747	5.80605	5.73913	5.91589	5.9554	5.92402	5.98518	6.36713	6.42934	7.17859	7.12464
ENSMUSG00000002320	Tm9sf1	6.34974	6.3256	6.25369	6.29432	6.28781	6.21435	5.75222	5.79733	5.68749	5.73461	5.4592	5.83277	5.78975	5.6937	5.58712	5.64186	5.73027	5.69696	5.79624	5.77308	5.80527	5.69786	5.89378	5.84746	6.03124	5.94745	6.11348	6.03278	6.07058	6.01532	6.85388	6.92208	6.81433	6.81009	6.84245	7.01904	6.30968	6.26549	5.74568	5.67553	5.74172	5.65308	5.79153	5.81303	6.03072	6.03956	6.86343	6.89053
ENSMUSG00000002325	Irf9	NA	NA	NA	NA	NA	NA	NA	NA	NA	NA	NA	NA	NA	NA	NA	NA	NA	NA	NA	NA	NA	NA	NA	NA	NA	NA	NA	NA	NA	NA	4.42944	4.35608	4.38898	4.64958	4.86632	4.65008	NA	NA	NA	NA	NA	NA	NA	NA	NA	NA	4.3915	4.72199
ENSMUSG00000002326	Gmpr2	6.25359	6.47534	6.45491	6.48557	6.36268	6.36308	5.91387	5.95879	6.00473	6.03261	6.0591	5.99078	5.92158	5.91551	5.94106	5.96775	5.99366	5.99542	6.02391	5.91126	6.04044	5.96143	6.06557	5.96643	6.66277	6.62947	6.72218	6.57957	6.63578	6.59002	7.47499	7.51929	7.42537	7.43539	7.38387	7.3365	6.39462	6.40377	5.95913	6.0275	5.91854	5.96749	5.99187	5.99781	6.67147	6.60179	7.47322	7.38525
ENSMUSG00000002329	Mdp1	5.95134	5.919	5.92461	5.885	6.00495	5.9282	5.34234	5.40886	5.22384	5.18189	5.38188	5.35059	5.50333	5.50319	5.48333	5.4171	5.52741	5.51916	5.87532	5.66573	5.90957	5.86072	5.80423	5.856	5.80071	5.77068	5.88266	5.71047	5.85171	5.77663	6.85428	6.85694	6.85302	6.73131	6.78299	6.7845	5.93165	5.93938	5.32501	5.30479	5.50326	5.47594	5.81687	5.84032	5.81801	5.7796	6.85474	6.76627
ENSMUSG00000002332	Dhrs1	7.04437	7.21656	7.04867	7.13036	7.12499	7.26105	6.80151	6.89434	6.84997	6.65798	6.52993	6.93634	6.90001	6.75144	6.9297	6.92873	6.88078	6.84726	6.94704	6.96009	6.9173	6.7783	6.94996	6.92504	7.22156	7.27237	7.28937	7.32964	7.23946	7.31918	8.2536	8.30834	8.30516	8.25493	8.17416	8.28479	7.1032	7.17213	6.8486	6.70808	6.82573	6.91307	6.94148	6.88443	7.2611	7.29609	8.28903	8.23796
ENSMUSG00000002341	Ncan	9.51428	9.29176	9.34626	9.42719	9.32734	9.35563	8.95102	8.91562	8.85701	9.03593	8.84955	8.98945	8.86842	8.85395	8.68909	8.85032	8.78544	8.78996	8.86843	8.7457	8.8176	8.74227	8.8523	8.88231	9.23218	9.09998	9.04266	9.15725	9.3113	9.05132	10.0106	10.025	9.94886	10.2175	10.1585	10.2592	9.3841	9.37005	8.90788	8.95831	8.86118	8.77495	8.81057	8.82563	9.12494	9.17329	9.99481	10.2117
ENSMUSG00000002342	Tmem161a	4.69535	4.62367	4.5716	4.68327	4.74539	4.66084	3.5675	3.67123	3.67366	3.68851	3.52899	3.63293	4.07965	4.13552	4.06117	4.0944	4.06009	4.03952	4.40058	4.23037	4.20211	4.2741	4.26917	4.26367	4.15405	4.10908	4.09191	4.15493	4.1599	4.12961	5.1101	5.19943	5.10057	5.09368	5.12745	5.06907	4.63021	4.6965	3.63746	3.61681	4.10758	4.07189	4.27769	4.26898	4.11835	4.14815	5.1367	5.09673
ENSMUSG00000002343	Armc6	6.43372	6.49202	6.51017	6.40881	6.48369	6.45586	5.97053	6.16648	6.00742	5.75484	6.14672	6.15429	6.12637	6.27394	6.1973	6.14114	6.30413	6.29368	6.22519	6.15758	6.23194	6.19317	6.27224	6.22335	6.38247	6.51123	6.33209	6.42569	6.47126	6.44585	7.41572	7.54298	7.48933	7.31154	7.4963	7.37737	6.47864	6.44945	6.04814	6.01862	6.20016	6.21419	6.20491	6.22959	6.40859	6.4476	7.48268	7.39507
ENSMUSG00000002345	Borcs8	4.33194	4.28667	4.41458	4.27623	4.22301	4.13959	3.84884	3.76414	3.72962	3.84683	3.77265	3.82281	3.67044	3.64411	3.58843	3.60535	3.6362	3.59905	3.99387	4.03428	3.92504	3.94099	4.00169	3.9522	3.94247	3.97137	3.98619	3.98842	4.07155	3.92673	4.99913	5.08506	5.06087	4.97767	5.06245	4.9971	4.3444	4.21294	3.78087	3.8141	3.65727	3.60999	3.9844	3.96496	3.96668	3.99557	5.04835	5.01241
ENSMUSG00000002346	Slc25a42	4.87162	5.00472	4.87585	4.96055	5.00752	4.95393	4.58599	4.70921	4.70898	4.74556	4.55287	4.65748	4.5011	4.53697	4.50234	4.51442	4.59463	4.50323	4.6559	4.70381	4.56373	4.59323	4.60664	4.63472	4.97805	5.06912	5.09164	5.00875	5.07249	5.03799	6.25405	6.41592	6.38547	6.39667	6.39034	6.48247	4.9174	4.974	4.66806	4.65197	4.51903	4.53713	4.64115	4.61153	5.04627	5.03974	6.35181	6.42316
ENSMUSG00000002365	Snx9	3.87753	3.98829	3.85046	3.86069	3.86811	3.86103	3.55936	3.62693	3.6195	3.64365	3.592	3.57668	3.61171	3.63463	3.64629	3.68858	3.61742	3.72504	3.90956	3.86205	3.94279	3.88983	3.84189	3.8421	4.27841	4.24474	4.30415	4.20792	4.32112	4.34818	5.58101	5.56858	5.58117	5.55877	5.68177	5.65173	3.90543	3.86328	3.60193	3.60411	3.62317	3.65076	3.9048	3.85794	4.27576	4.2924	5.57692	5.63076
ENSMUSG00000002372	Ranbp3	7.88312	7.84695	7.59809	7.77497	7.682	7.71981	7.21843	7.4521	7.25381	7.37215	7.43941	7.39274	7.31944	7.42104	7.3617	7.27939	7.33922	7.40496	7.5222	7.39143	7.44071	7.58437	7.44553	7.48545	7.71727	7.71384	7.81573	7.67761	7.69902	7.6312	8.43215	8.6522	8.54917	8.51252	8.42018	8.54225	7.77606	7.72559	7.30811	7.40143	7.37024	7.32677	7.45145	7.50512	7.74894	7.66927	8.54451	8.49165
ENSMUSG00000002379	Ndufa11	7.54003	7.61451	7.34018	7.62899	7.51766	7.25246	6.86145	6.86991	6.68388	6.89451	6.48642	6.85425	7.23474	7.16292	7.13078	7.27871	7.15535	7.18729	7.2189	7.1279	7.20827	7.40178	7.21254	7.37555	7.1205	7.25564	7.35001	7.16539	7.24481	7.07621	8.32231	8.65981	8.47077	8.19052	8.35061	8.56431	7.49824	7.46637	6.80508	6.74506	7.19883	7.18828	7.18503	7.32996	7.24205	7.16214	8.4843	8.36848
ENSMUSG00000002393	Nr2f6	3.55596	3.50077	3.55722	3.47615	3.52804	3.50452	2.70159	2.68091	2.70119	2.76837	2.7595	2.73711	2.65377	2.69939	2.6381	2.66951	2.64861	2.70107	3.30428	3.30263	3.2927	3.33349	3.33299	3.32051	2.94316	2.89334	2.96744	2.90414	2.9872	2.92032	4.01985	4.07159	4.0092	4.06094	4.0223	4.1129	3.53798	3.50291	2.69456	2.75499	2.67658	2.65207	3.29987	3.32899	2.93465	2.93722	4.03355	4.06538
ENSMUSG00000002395	Use1	5.66469	5.54456	5.55733	5.58553	5.6242	5.46423	5.23848	5.10484	5.09026	5.12407	5.21037	5.20539	5.58701	5.49781	5.50685	5.51709	5.52748	5.49978	5.54727	5.45979	5.44501	5.41939	5.51797	5.6028	5.45483	5.48127	5.54385	5.47808	5.40731	5.41267	6.3013	6.26235	6.23617	6.37694	6.29159	6.28802	5.58886	5.55799	5.14453	5.17994	5.54241	5.51714	5.48402	5.51339	5.49332	5.43268	6.26661	6.31885
ENSMUSG00000002396	Ocel1	2.85323	2.73615	2.73573	2.7997	2.79373	2.72373	NA	NA	NA	NA	NA	NA	2.50625	2.39734	2.44704	2.41167	2.41733	2.44145	2.14284	2.13813	2.15858	2.11243	2.14937	2.15337	NA	NA	NA	NA	NA	NA	3.55709	3.51174	3.57588	3.56563	3.48444	3.53511	2.77504	2.77239	NA	NA	2.45179	2.42535	2.14652	2.13839	NA	NA	3.54824	3.5284
ENSMUSG00000002409	Dyrk1b	5.10798	5.05966	5.03363	5.08767	5.05741	4.95338	4.58856	4.51237	4.41799	4.33863	4.42386	4.43737	4.69856	4.66498	4.69779	4.76894	4.69681	4.67866	4.44943	4.47704	4.47689	4.39854	4.55765	4.58416	4.86188	4.96228	4.84978	4.87014	4.8294	4.82148	5.63777	5.5692	5.73759	5.62366	5.5359	5.6226	5.06709	5.03282	4.50631	4.39995	4.68177	4.72118	4.46779	4.51345	4.89131	4.84034	5.64819	5.59406
ENSMUSG00000002413	Braf	9.23806	9.24829	9.31016	9.2553	9.22461	9.18083	8.83529	8.84692	8.88773	8.71091	8.71769	8.80137	8.88548	8.87395	8.83831	8.77352	8.95446	8.85408	8.69483	8.70999	8.69205	8.6928	8.65469	8.59596	9.29129	9.3241	9.30631	9.27539	9.2835	9.31651	10.1469	10.0438	9.96188	10.0694	9.98017	10.1287	9.2655	9.22025	8.85665	8.74332	8.87971	8.85543	8.69896	8.64781	9.30723	9.2918	10.0509	10.0594
ENSMUSG00000002416	Ndufb2	6.33459	6.08563	6.06807	6.28783	6.14276	6.19603	5.66686	5.69396	5.67886	5.57809	5.65704	5.51068	5.77244	5.62861	5.68283	5.62227	5.79749	5.83913	6.11435	5.86163	5.90507	5.7722	5.65539	5.93684	6.04506	5.96039	5.95147	6.15416	6.05426	6.07674	6.87049	6.87754	6.81897	6.72369	6.69575	6.80338	6.16276	6.20887	5.67989	5.58194	5.70053	5.70086	5.96035	5.78814	5.98564	6.09505	6.85567	6.74094
ENSMUSG00000002428	Hltf	6.74905	6.83497	7.04207	6.84944	6.90874	6.94681	6.492	6.69547	6.8146	6.79651	7.02436	6.64228	6.48657	6.5792	6.67682	6.65183	6.62819	6.56947	6.26868	6.41103	6.26157	6.26516	6.39121	6.24984	7.09389	7.20483	7.11288	7.20714	7.06862	7.23956	8.14799	8.00029	7.8188	7.9429	8.02993	7.86516	6.87537	6.90166	6.66736	6.82105	6.53288	6.65228	6.31376	6.30207	7.1372	7.17177	7.98903	7.946
ENSMUSG00000002455	Prpf6	7.9777	7.9843	8.04626	7.9803	7.85255	7.97461	7.61025	7.69096	7.48225	7.77229	7.68122	7.60906	7.82399	7.64766	7.69851	7.69648	7.69922	7.78357	7.88018	7.65189	7.79835	7.7552	7.58005	7.80427	8.01656	7.95909	8.05532	7.93574	8.09257	7.94469	8.97683	8.88362	8.93367	8.93479	8.95973	8.98911	8.00275	7.93582	7.59449	7.68752	7.73582	7.69807	7.77681	7.71318	8.01032	7.991	8.93137	8.96121
ENSMUSG00000002458	Rgs19	5.73674	5.68862	5.59629	5.70558	5.69268	5.59075	5.489	5.35454	5.33253	5.33577	5.28714	5.43462	5.50263	5.40766	5.43017	5.42445	5.40057	5.43861	5.44392	5.40614	5.44077	5.42506	5.33452	5.38882	5.31557	5.31786	5.34784	5.31539	5.30446	5.32537	6.61619	6.67207	6.66483	6.58794	6.68332	6.64458	5.67388	5.663	5.39202	5.35251	5.45514	5.41839	5.43028	5.3828	5.32709	5.31507	6.65103	6.63861
ENSMUSG00000002459	Rgs20	3.85434	3.83143	3.81859	3.7697	3.80187	3.9252	3.41865	3.40901	3.43197	3.41928	3.35862	3.45006	3.35014	3.3305	3.31688	3.32744	3.34378	3.31866	3.26679	3.28031	3.22232	3.26043	3.21829	3.30555	4.11161	4.04118	4.05289	3.98962	4.04173	4.03002	4.40259	4.35163	4.45473	4.42672	4.43787	4.41492	3.83478	3.83226	3.41988	3.40932	3.34032	3.32937	3.25647	3.26143	4.06856	4.02046	4.40298	4.42651
ENSMUSG00000002475	Abhd3	5.19957	5.1904	5.25422	5.23997	5.21132	5.30853	4.87753	4.87864	4.83045	4.95177	4.76933	4.96012	4.42561	4.56469	4.54223	4.63321	4.59582	4.54193	4.84937	4.88677	4.91728	4.81339	4.80097	4.95368	5.32739	5.33315	5.19516	5.14491	5.31754	5.28051	5.94326	6.05962	5.99991	5.9267	6.04873	5.92708	5.21473	5.25327	4.86221	4.89374	4.49515	4.59042	4.88447	4.85602	5.28524	5.24765	6.00093	5.96751
ENSMUSG00000002477	Snrpd1	7.2697	7.3725	7.5163	7.45741	7.35977	7.61308	7.27801	7.26269	7.28783	7.20612	7.37569	7.32025	7.24289	7.19267	7.12232	7.11201	7.107	7.23236	6.87202	7.01514	7.12584	6.95053	7.0528	6.65681	7.87464	7.87787	7.89911	7.8324	7.85643	7.86342	8.61008	8.38119	8.66444	8.65662	8.42131	8.58135	7.38617	7.47675	7.27617	7.30069	7.21778	7.11378	7.00433	6.88671	7.88387	7.85075	8.5519	8.55309
ENSMUSG00000002486	Tchp	3.03892	2.98909	2.92361	2.96551	2.93225	2.96572	3.6834	3.55964	3.55888	3.60138	3.82293	3.61395	3.31644	3.38432	3.36648	3.32948	3.34605	3.3102	3.36915	3.29097	3.42836	3.36144	3.39916	3.36216	3.34181	3.28966	3.40103	3.33228	3.37995	3.37991	4.38872	4.49138	4.48037	4.40934	4.42933	4.40566	2.98388	2.95449	3.60064	3.67942	3.35038	3.34733	3.36283	3.37426	3.34417	3.36404	4.45349	4.41478
ENSMUSG00000002489	Tiam1	8.34382	8.29821	8.16682	8.40909	8.19933	8.17438	7.98146	7.97325	7.898	7.79773	7.92854	7.98636	8.11161	7.96791	8.13228	7.93318	8.08504	7.90311	8.2079	8.19353	8.10307	8.17548	8.1416	8.38258	8.25429	8.38462	8.32321	8.28017	8.21813	8.27446	8.91017	9.14388	9.19014	9.24684	9.2171	9.22819	8.26962	8.26093	7.9509	7.90421	8.03976	8.05017	8.16817	8.23322	8.3207	8.25759	9.0814	9.23071
ENSMUSG00000002496	Tsc2	8.50638	8.50602	8.3761	8.6576	8.5856	8.23569	8.23242	8.24753	8.0834	8.18867	8.18955	7.99981	8.56716	8.40033	8.37989	8.37878	8.40109	8.41308	8.33242	8.36977	8.30723	8.48886	8.58733	8.54412	8.66935	8.72011	8.76049	8.80422	8.76557	8.75992	9.64441	9.75317	9.79235	9.77412	9.81685	9.86646	8.46283	8.49296	8.18778	8.12601	8.48374	8.38659	8.33647	8.5401	8.71665	8.77657	9.72998	9.81915
ENSMUSG00000002504	Slc9a3r2	3.24927	3.38242	3.26599	3.29629	3.29283	3.27839	2.93654	2.875	2.82154	2.82304	2.83424	2.89341	3.22793	3.25507	3.26535	3.22024	3.19783	3.23717	3.63317	3.42876	3.54587	3.47728	3.69922	3.58079	3.69691	3.60685	3.61326	3.65756	3.65375	3.60431	4.12633	4.21391	4.17085	4.02955	4.02119	4.01909	3.29923	3.28917	2.87769	2.85023	3.2415	3.22781	3.53593	3.58576	3.63901	3.63854	4.17036	4.02328
ENSMUSG00000002524	Puf60	8.9659	8.86042	8.87501	8.94563	8.87755	9.00591	8.44708	8.67984	8.58612	8.43785	8.20704	8.66234	8.65124	8.65907	8.5707	8.5676	8.5181	8.56668	8.68744	8.68268	8.65175	8.60158	8.66768	8.73038	9.01823	8.94355	9.10404	9.12482	9.02258	8.99155	9.78496	9.86782	9.83722	9.83139	9.75153	9.85017	8.90044	8.94303	8.57101	8.43574	8.65515	8.55213	8.67395	8.66655	9.02194	9.04632	9.83	9.81103
ENSMUSG00000002546	Golga2	7.90226	7.90418	7.96076	7.95146	7.84307	7.88852	7.49771	7.56637	7.46241	7.48159	7.67545	7.5631	7.31771	7.5043	7.36108	7.35757	7.29178	7.42838	7.60869	7.49967	7.59322	7.51483	7.49277	7.54197	7.80642	7.86291	7.90374	7.94557	7.8679	7.79474	8.75699	8.76404	8.72836	8.76265	8.77272	8.79878	7.9224	7.89435	7.50883	7.57338	7.411	7.33681	7.56719	7.51652	7.85769	7.8694	8.7498	8.77805
ENSMUSG00000002550	Uck1	3.61863	3.69646	3.56406	3.6711	3.61714	3.59313	3.35345	3.34344	3.29632	3.31225	3.33278	3.32408	3.54694	3.57281	3.55419	3.54986	3.55703	3.54449	3.86033	3.76493	3.80374	3.89232	3.83756	3.80103	3.66683	3.67313	3.65342	3.7415	3.71485	3.64828	4.3667	4.45975	4.41064	4.27676	4.39019	4.34382	3.62638	3.62712	3.33107	3.32304	3.55987	3.55369	3.80967	3.84364	3.66446	3.70154	4.41237	4.33692
ENSMUSG00000002565	Scin	NA	NA	NA	NA	NA	NA	NA	NA	NA	NA	NA	NA	NA	NA	NA	NA	NA	NA	NA	NA	NA	NA	NA	NA	1.82996	1.89522	1.9271	1.87513	1.84672	1.8738	NA	NA	NA	NA	NA	NA	NA	NA	NA	NA	NA	NA	NA	NA	1.88409	1.86522	NA	NA
ENSMUSG00000002578	Ikzf4	3.13507	3.06372	3.0095	3.02132	3.04593	3.0774	2.6583	2.66646	2.69736	2.62833	2.66769	2.64713	3.23387	3.20754	3.21127	3.35258	3.21165	3.22405	3.22735	3.25081	3.26028	3.27136	3.22333	3.25189	3.64792	3.65767	3.71299	3.71021	3.67095	3.67997	4.60111	4.61045	4.65828	4.64423	4.66468	4.58402	3.06943	3.04822	2.67404	2.64772	3.2207	3.2585	3.24615	3.24886	3.67286	3.68704	4.62328	4.63098
ENSMUSG00000002580	Mien1	6.91579	6.72781	6.67362	6.67981	6.7515	6.7897	6.52333	6.56473	6.53635	6.43364	6.72001	6.54277	6.46145	6.54001	6.61236	6.59883	6.51108	6.56971	6.70769	6.5333	6.67566	6.59296	6.5595	6.62888	6.92116	6.85468	6.8852	6.81571	7.00312	6.90909	7.69261	7.7613	7.95672	7.74823	7.76317	7.71522	6.77241	6.74034	6.54147	6.56548	6.50073	6.57409	6.63888	6.59378	6.88701	6.90931	7.80354	7.74221
ENSMUSG00000002602	Axl	NA	NA	NA	NA	NA	NA	NA	NA	NA	NA	NA	NA	NA	NA	NA	NA	NA	NA	NA	NA	NA	NA	NA	NA	NA	NA	NA	NA	NA	NA	2.74675	2.7364	2.77862	2.76476	2.80271	2.77671	NA	NA	NA	NA	NA	NA	NA	NA	NA	NA	2.75392	2.78139
ENSMUSG00000002608	Ccdc97	6.26562	6.29071	6.15688	6.29103	6.25339	6.29738	5.71487	5.8273	5.64521	5.8791	5.77884	5.71119	5.94437	6.01045	5.96558	5.94497	5.98378	5.97473	6.37174	6.06008	6.16222	6.10193	6.05746	6.21744	6.26496	6.23601	6.302	6.20579	6.29785	6.14455	7.21033	7.2339	7.14189	7.07275	7.07345	7.07132	6.23774	6.2806	5.72912	5.78971	5.97741	5.96478	6.19801	6.12561	6.26765	6.21606	7.19537	7.0725
ENSMUSG00000002617	Zfp40	5.61606	5.69591	5.67463	5.68242	5.77416	5.78676	5.75611	5.86214	5.91978	5.9638	5.87045	5.73537	5.72785	5.76163	5.74297	5.63883	5.88933	5.76505	5.02313	5.20249	5.02593	5.07919	5.085	4.98177	6.21007	6.15955	6.17511	6.21728	6.15094	6.38843	7.03152	6.79245	6.80897	7.08835	7.0905	6.7826	5.6622	5.74778	5.84601	5.85654	5.74474	5.75704	5.08385	5.04865	6.18158	6.25222	6.87765	6.98715
ENSMUSG00000002625	Akap8l	6.56634	6.63146	6.33806	6.63344	6.58058	6.48893	6.45537	6.43029	6.28728	6.55976	5.97958	6.29558	6.4066	6.35066	6.47302	6.43642	6.4886	6.42759	6.40529	6.32706	6.38162	6.52301	6.44	6.2849	6.73724	6.93926	6.81706	6.85904	6.59379	6.72589	7.51104	7.48876	7.55586	7.65259	7.68844	7.64556	6.51195	6.56765	6.39098	6.27831	6.37863	6.46601	6.37132	6.41597	6.83118	6.72624	7.51855	7.6622
ENSMUSG00000002633	Shh	NA	NA	NA	NA	NA	NA	NA	NA	NA	NA	NA	NA	NA	NA	NA	NA	NA	NA	NA	NA	NA	NA	NA	NA	NA	NA	NA	NA	NA	NA	2.25034	2.19734	2.17739	2.20284	2.21467	2.20717	NA	NA	NA	NA	NA	NA	NA	NA	NA	NA	2.20836	2.20823
ENSMUSG00000002635	Pdcd2l	5.75472	5.54285	5.5638	5.6323	5.63472	5.63958	5.69438	5.45061	5.47376	5.61146	5.71797	5.63835	5.44753	5.40753	5.43108	5.37596	5.37147	5.34192	5.43175	5.41742	5.5169	5.55065	5.54695	5.48198	5.82104	5.89144	5.75675	5.86776	5.76886	5.71986	6.72333	6.65897	6.65851	6.70458	6.72142	6.65543	5.62046	5.63553	5.53958	5.65593	5.42753	5.39283	5.45536	5.52653	5.82308	5.78549	6.68027	6.69381
ENSMUSG00000002658	Gtf2f1	7.67547	7.54149	7.43593	7.62345	7.54162	7.58923	7.34951	7.31665	7.22391	7.30496	7.13697	7.30594	7.12726	7.29393	7.28125	7.27267	7.19043	7.17967	7.11732	7.18317	7.16372	7.06985	7.08231	7.1945	7.53589	7.64829	7.73722	7.53065	7.66833	7.61508	8.56271	8.50754	8.41057	8.47696	8.53098	8.38163	7.55096	7.58477	7.29669	7.24929	7.21059	7.24812	7.15474	7.11555	7.64047	7.60469	8.49361	8.46319
ENSMUSG00000002660	Clpp	5.6401	5.66044	5.51499	5.68353	5.70687	5.5764	5.30067	5.41685	5.34397	5.37924	5.36509	5.29779	5.5897	5.5771	5.52681	5.55181	5.51458	5.6522	5.8046	5.72705	5.81955	5.73795	5.93301	5.85975	5.61925	5.69484	5.65015	5.7381	5.62389	5.58101	6.53433	6.72485	6.51043	6.58574	6.67627	6.73428	5.60518	5.6556	5.35383	5.34737	5.5834	5.53106	5.78373	5.84357	5.65475	5.64766	6.58987	6.66543
ENSMUSG00000002661	Alkbh7	4.87244	4.95602	4.73036	4.89091	4.84319	4.86962	4.7092	4.71456	4.70673	4.671	4.66756	4.72931	4.73674	4.5758	4.54795	4.64608	4.58666	4.57658	4.73559	4.54766	4.59939	4.55732	4.54701	4.65649	5.10241	5.11772	5.12445	5.01712	5.21882	5.10489	5.74601	5.73754	5.74221	5.67914	5.72715	5.6672	4.85294	4.8679	4.71016	4.68929	4.65627	4.59356	4.62755	4.58694	5.11486	5.11361	5.74192	5.69117
ENSMUSG00000002679	Med6	6.65893	6.8117	6.86306	6.82088	6.85479	6.85618	6.66409	6.73696	6.74723	6.70289	6.86731	6.66772	6.58399	6.6256	6.57544	6.5153	6.52831	6.58819	6.45108	6.37257	6.44517	6.44571	6.3498	6.25862	7.06942	7.02887	7.1245	6.85935	7.03057	7.07483	7.78158	7.73747	7.57935	7.82629	7.71806	7.8841	6.7779	6.84395	6.71609	6.74598	6.6048	6.53968	6.42294	6.35138	7.07427	6.98825	7.69946	7.80948
ENSMUSG00000002688	Prkd1	3.5324	3.58848	3.51967	3.54608	3.54424	3.54639	3.89484	3.96201	4.01877	4.03218	4.25434	4.00446	3.72007	3.72511	3.76665	3.70759	3.84723	3.75504	3.51515	3.51145	3.44381	3.47464	3.48765	3.44774	3.88396	3.8783	3.92819	3.90521	3.88702	3.95309	4.85446	4.79432	4.67994	4.76518	4.74173	4.6842	3.54685	3.54557	3.95854	4.09699	3.72259	3.77382	3.49013	3.47001	3.89682	3.91511	4.77624	4.73037
ENSMUSG00000002699	Lcp2	NA	NA	NA	NA	NA	NA	NA	NA	NA	NA	NA	NA	NA	NA	NA	NA	NA	NA	NA	NA	NA	NA	NA	NA	2.39102	2.44414	2.44023	2.53481	2.41592	2.41396	2.27206	2.25815	2.26266	2.25483	2.24374	2.23127	NA	NA	NA	NA	NA	NA	NA	NA	2.42513	2.4549	2.26429	2.24328
ENSMUSG00000002718	Cse1l	9.32805	9.50245	9.67627	9.49408	9.4306	9.74059	9.37637	9.29931	9.45973	9.35057	9.41385	9.51816	8.92632	9.0051	9.14278	9.1164	9.18973	8.96241	8.92551	9.05928	8.85372	8.80736	8.79013	8.76844	9.80001	9.93586	9.94875	9.81304	9.8284	10.0546	10.646	10.3866	10.5604	10.5595	10.4898	10.4334	9.50226	9.55509	9.37847	9.42752	8.96571	9.14964	8.94617	8.78864	9.89487	9.89868	10.531	10.4942
ENSMUSG00000002728	Naa20	6.16364	6.20719	6.36138	6.34773	6.26337	6.26708	6.17079	6.24676	6.24843	6.13785	6.25883	6.38588	5.96859	6.00236	5.90088	6.01282	5.95494	5.91439	5.98824	5.92705	5.95676	5.84899	5.8504	5.86531	6.59651	6.42274	6.75845	6.64829	6.56394	6.59043	7.48159	7.37022	7.37718	7.23399	7.43211	7.39713	6.24407	6.29273	6.22199	6.26085	5.98547	5.95622	5.95735	5.8549	6.59256	6.60089	7.40966	7.35441
ENSMUSG00000002731	Prkra	6.3097	6.02901	6.01952	6.16201	6.08706	6.11948	5.64326	5.74463	5.75845	5.69482	5.71433	5.84023	5.67403	5.697	5.70361	5.71105	5.7059	5.71927	5.3957	5.43042	5.42308	5.37649	5.49896	5.4536	6.13074	6.32281	6.22117	6.09445	6.17821	6.18259	6.72966	6.73592	6.7191	6.7735	6.75406	6.75875	6.11941	6.12285	5.71545	5.74979	5.68551	5.70685	5.4164	5.44302	6.22491	6.15175	6.72823	6.7621
ENSMUSG00000002732	Fkbp7	4.53338	4.51334	4.54784	4.49411	4.52349	4.52707	4.07356	4.1574	4.16764	4.22198	4.11104	4.08343	3.78803	3.86916	3.80983	3.73908	3.73109	3.74188	3.21173	3.24591	3.24583	3.20089	3.30155	3.18226	4.08809	3.9635	3.9895	4.02982	4.16145	4.0182	4.96563	4.96889	4.97632	5.02083	4.90939	4.96959	4.53152	4.51489	4.13286	4.13882	3.82859	3.76	3.23449	3.22823	4.01369	4.06982	4.97028	4.9666
ENSMUSG00000002733	Plekha3	4.93011	4.8725	4.7623	4.87331	4.87347	4.77403	4.68743	4.60892	4.69295	4.61928	4.53886	4.53375	4.6819	4.70865	4.62028	4.62184	4.57778	4.70252	4.62955	4.65123	4.66777	4.76722	4.68568	4.61826	4.74744	4.74647	4.74814	4.81898	4.79168	4.81123	5.91314	6.05923	5.88881	6.02485	5.95382	6.02255	4.85497	4.84027	4.6631	4.56396	4.69527	4.60663	4.64951	4.69039	4.74735	4.8073	5.95373	6.00041
ENSMUSG00000002741	Ykt6	7.15311	7.10091	6.9743	7.04444	7.07432	7.01786	6.66529	6.75037	6.69574	7.04927	7.08858	6.69226	6.92946	6.91233	6.85925	6.8671	6.89929	6.88279	6.86895	6.76776	6.72914	6.84613	6.86895	6.75714	7.23911	7.22462	7.38798	7.10523	7.26313	7.13957	8.08293	8.19363	8.15861	8.13693	8.0541	8.20386	7.07611	7.04554	6.7038	6.94337	6.92089	6.87521	6.78862	6.82407	7.2839	7.16931	8.14506	8.13163
ENSMUSG00000002748	Baz1b	8.88188	8.96022	8.81948	8.94135	8.95369	8.90942	8.69307	8.48263	8.62096	8.75733	8.42802	8.20287	8.7363	8.68213	8.76303	8.75089	8.80243	8.77651	8.33438	8.56149	8.35996	8.54882	8.66149	8.51947	9.24702	9.43053	9.08711	9.31546	9.22472	9.38181	10.0879	9.86332	10.1161	10.032	9.93193	9.96401	8.88719	8.93482	8.59889	8.46274	8.70921	8.77212	8.41861	8.5766	9.25488	9.30733	10.0224	9.97597
ENSMUSG00000002763	Pex6	5.09456	4.98274	5.04955	5.07237	5.0007	4.93019	4.42778	4.43377	4.35516	4.43412	4.3	4.3027	4.64167	4.67669	4.55416	4.57633	4.56182	4.63172	4.94597	4.89764	4.77849	4.91305	4.91903	5.02699	4.58993	4.74079	4.62456	4.53148	4.65027	4.65262	5.94335	5.94951	5.96816	5.88478	5.91314	5.98981	5.04228	5.00108	4.40557	4.34561	4.65918	4.5641	4.87403	4.95302	4.65176	4.61146	5.95367	5.92924
ENSMUSG00000002767	Mrpl2	6.96733	6.84865	6.82797	6.90103	6.95392	6.9232	6.46154	6.64493	6.53927	6.7591	6.84051	6.59578	6.38849	6.34069	6.26608	6.32298	6.21747	6.4064	6.49489	6.36273	6.50166	6.52049	6.47856	6.51607	6.87077	6.80254	6.92427	6.92813	6.81697	6.68456	7.72259	7.66494	7.63973	7.53525	7.45201	7.66122	6.88132	6.92605	6.54858	6.7318	6.36459	6.26885	6.45309	6.50504	6.86586	6.80989	7.67576	7.54949
ENSMUSG00000002768	Mea1	7.07744	6.96573	7.00681	6.95497	6.90594	6.89718	6.80519	6.66283	6.59087	6.71109	6.73266	6.68408	6.82019	6.73818	6.63582	6.69665	6.73624	6.74454	6.73569	6.66517	6.68457	6.77975	6.80693	6.80103	6.77717	6.85193	6.6475	6.60933	6.80117	6.63464	7.68114	7.69658	7.64894	7.67336	7.64323	7.70102	7.01666	6.91936	6.6863	6.70927	6.77919	6.68957	6.69514	6.7959	6.75887	6.68171	7.67555	7.67254
ENSMUSG00000002778	Kdelr1	7.52533	7.62372	7.55156	7.62624	7.62398	7.70025	7.57443	7.45373	7.41266	7.53376	7.54151	7.58679	7.34959	7.54998	7.51577	7.46056	7.4284	7.27394	7.22002	7.42751	7.43367	7.30946	7.38456	7.35263	7.81901	7.91195	8.14591	7.90286	8.01633	7.95609	8.70173	8.90283	8.79883	8.78575	8.83553	8.76053	7.56687	7.65015	7.48027	7.55402	7.44978	7.46824	7.3604	7.34888	7.95896	7.95843	8.80113	8.79394
ENSMUSG00000002781	Tmem143	5.27831	5.22222	5.17707	5.33271	5.37886	5.3136	5.29209	5.23391	5.28889	5.21761	5.32844	5.30372	5.20429	5.22136	5.17857	5.22281	5.16908	5.25306	5.16542	5.18205	5.11925	5.32066	5.24239	5.15454	5.91846	6.01247	6.10685	6.1229	6.07644	6.13541	6.63023	6.66178	6.71856	6.57308	6.65437	6.57569	5.22587	5.34173	5.27163	5.28326	5.21282	5.19015	5.15557	5.23919	6.01259	6.11159	6.67019	6.60105
ENSMUSG00000002797	Ggct	6.07946	6.11859	6.149	6.06028	6.02089	6.18736	5.90202	6.02524	6.0395	6.07554	5.98672	6.00712	5.59385	5.78644	5.73879	5.6019	5.83334	5.87953	5.40031	5.47139	5.5332	5.59049	5.52669	5.44713	6.22682	6.23701	6.26849	6.12868	6.28294	6.17784	6.9073	6.8221	6.73203	6.751	6.67671	6.75589	6.11568	6.08951	5.98892	6.02312	5.69015	5.72468	5.4683	5.52144	6.24411	6.19649	6.82047	6.72787
ENSMUSG00000002799	Jag2	5.41184	5.48155	5.26884	5.4107	5.46651	5.32211	4.81927	4.77072	4.84136	4.80951	4.81151	4.96391	4.96303	4.88387	4.93552	4.95563	4.99382	4.92188	5.03564	5.02703	5.0872	5.01187	5.02185	5.03865	5.46349	5.30267	5.42111	5.51203	5.54146	5.36957	6.37174	6.29404	6.29448	6.21287	6.28884	6.3489	5.38741	5.39977	4.81045	4.86164	4.92345	4.96166	5.04996	5.02413	5.39576	5.47435	6.32008	6.28353
ENSMUSG00000002803	Btbd6	6.05749	6.08642	5.99883	5.92395	5.84706	5.93106	5.35965	5.42743	5.26259	5.27806	5.41301	5.37768	5.31737	5.33173	5.29037	5.32924	5.31862	5.37635	5.58082	5.53034	5.46519	5.6577	5.53894	5.56507	5.72435	5.73053	5.82143	5.88339	5.80366	5.66515	6.4304	6.57033	6.46442	6.45099	6.47011	6.46878	6.04758	5.90069	5.34989	5.35625	5.32455	5.31274	5.52545	5.58724	5.75877	5.78407	6.48838	6.46329
ENSMUSG00000002804	Nudt14	4.60905	4.62515	4.59077	4.67538	4.62331	4.69095	4.5584	4.49935	4.57794	4.51607	4.53338	4.59657	4.11877	4.20009	4.20072	4.28009	4.14493	4.15073	4.1278	4.16938	4.1428	4.11745	4.17895	4.10147	4.8915	4.8569	5.06723	5.02768	4.98117	4.95139	5.72353	5.75201	5.79337	5.78841	5.8389	5.74784	4.60832	4.66321	4.54523	4.54867	4.15943	4.20858	4.14666	4.13262	4.93855	4.98675	5.7563	5.79172
ENSMUSG00000002808	Epdr1	9.319	9.30777	9.40904	9.38414	9.35918	9.55459	9.21092	9.3089	9.37195	9.15786	9.3155	9.32113	8.85037	8.99909	9.12689	9.07097	8.98277	8.89385	8.9026	9.08256	8.91687	8.88233	8.94599	8.65985	9.588	9.55415	9.78988	9.77706	9.78405	9.77147	10.3886	10.4578	10.315	10.187	10.1688	10.2137	9.34527	9.43264	9.29726	9.26483	8.92473	9.06021	8.96734	8.82939	9.64401	9.77753	10.3871	10.1898
ENSMUSG00000002812	Flii	6.62	6.73268	6.7338	6.62357	6.7487	6.71329	6.31434	6.15423	6.28019	6.39254	6.00155	6.26454	6.56846	6.50597	6.41244	6.5602	6.46774	6.45248	6.36366	6.38937	6.29298	6.46816	6.40321	6.62034	6.79949	6.84188	6.71473	6.81723	6.74907	6.65676	7.6907	7.57582	7.66764	7.49073	7.53531	7.60189	6.69549	6.69518	6.24959	6.21955	6.53721	6.48012	6.34867	6.49724	6.78536	6.74102	7.64472	7.54264
ENSMUSG00000002814	Top3a	3.75811	3.69315	3.78958	3.80371	3.806	3.66885	2.88847	2.89456	2.89009	2.8197	2.80182	2.86088	3.26502	3.28431	3.26772	3.23355	3.24366	3.24962	3.31534	3.38052	3.36147	3.36228	3.37324	3.35225	3.83482	3.92863	3.9397	3.93461	3.92833	3.87612	4.71505	4.70951	4.74293	4.72286	4.76232	4.75359	3.74695	3.75952	2.89104	2.82747	3.27467	3.24831	3.35244	3.36259	3.90105	3.91302	4.72249	4.74626
ENSMUSG00000002820	Atg4d	3.34445	3.41511	3.4095	3.39976	3.40084	3.40901	2.74884	2.69798	2.68113	2.66105	2.6714	2.70778	3.23205	3.30165	3.25369	3.31571	3.29238	3.31166	2.8872	2.92481	2.92475	2.92012	2.89548	2.95424	3.30517	3.38373	3.35527	3.43671	3.3868	3.36234	4.17701	4.18331	4.20893	4.19456	4.25964	4.16865	3.38969	3.40321	2.70931	2.68007	3.26685	3.28726	2.91225	2.92328	3.34805	3.39529	4.18975	4.20762
ENSMUSG00000002825	Qtrt1	4.11654	4.14019	4.07506	4.08001	4.1278	4.13095	4.01082	3.99661	3.91849	4.00054	3.90133	3.97488	4.10514	4.11168	4.13706	4.14752	4.11289	4.11378	3.96737	3.88888	3.91626	3.88661	3.85989	3.88834	4.26415	4.19042	4.21977	4.15497	4.20868	4.22222	5.4312	5.3878	5.43436	5.42253	5.50594	5.38747	4.1106	4.11292	3.97531	3.95891	4.10841	4.13249	3.92417	3.87828	4.22478	4.19529	5.41779	5.43865
ENSMUSG00000002833	Hdgfl2	8.03403	8.04176	7.81736	7.92287	7.9088	7.94807	7.7837	7.75488	7.57694	7.60201	7.63646	7.67623	7.63012	7.6899	7.6508	7.64561	7.65863	7.77463	7.83745	7.73616	7.7626	7.84368	7.85338	7.76132	7.99709	8.02868	8.07154	8.06258	8.12017	7.96152	8.96246	8.87297	8.76519	8.76417	8.78296	8.7034	7.96438	7.92658	7.70518	7.63823	7.66001	7.65168	7.77874	7.81946	8.03244	8.04809	8.86687	8.75018
ENSMUSG00000002835	Chaf1a	3.09923	3.09578	3.08049	3.06259	3.06816	3.09081	2.85017	2.84138	2.86066	2.82236	2.95225	2.86698	3.09538	3.06075	3.00476	2.99646	2.99177	3.04863	3.01335	2.98005	3.0305	3.06048	3.04028	2.99667	2.8015	2.79336	2.79904	2.80722	2.79845	2.82133	4.23406	4.19857	4.18779	4.19568	4.22432	4.25488	3.09184	3.07385	2.85074	2.88053	3.07806	2.99766	3.00797	3.03247	2.79797	2.809	4.20681	4.22496
ENSMUSG00000002844	Adprh	8.76188	8.84211	8.88057	8.7909	8.75682	8.91151	8.44131	8.59245	8.55409	8.5024	8.6657	8.61092	8.67129	8.43429	8.46882	8.59464	8.44831	8.48016	8.60426	8.48187	8.53352	8.45489	8.47677	8.30317	9.08044	8.98799	9.02994	9.01719	8.98124	8.89831	9.96677	9.95885	9.97244	9.88071	9.81419	9.96237	8.82819	8.81974	8.52929	8.59301	8.55279	8.50392	8.53989	8.41161	9.03279	8.96558	9.96602	9.88576
ENSMUSG00000002845	Tmem39a	2.28216	2.38035	2.29184	2.3308	2.34341	2.35827	NA	NA	NA	NA	NA	NA	NA	NA	NA	NA	NA	NA	1.86628	1.89784	1.94641	1.90533	1.8686	1.93784	2.28191	2.20685	2.25774	2.27258	2.22408	2.26166	2.58059	2.5568	2.58054	2.56944	2.5652	2.57886	2.31812	2.34416	NA	NA	NA	NA	1.90351	1.90393	2.24883	2.25277	2.57264	2.57117
ENSMUSG00000002846	Timmdc1	5.58346	5.58793	5.64835	5.57487	5.48219	5.52935	5.25546	5.2183	5.28404	5.12327	5.25315	5.15134	5.402	5.39353	5.3204	5.32487	5.22308	5.46803	5.28443	5.32485	5.45329	5.23904	5.28869	5.31228	5.69086	5.63572	5.45441	5.6636	5.66159	5.55926	6.40098	6.50602	6.53961	6.58506	6.50388	6.51403	5.60658	5.52881	5.2526	5.17592	5.39777	5.28945	5.35419	5.28001	5.59366	5.62815	6.4822	6.53433
ENSMUSG00000002870	Mcm2	3.84298	3.89239	3.85421	3.92564	3.91042	3.80518	3.20751	3.21546	3.27095	3.1439	3.15668	3.20938	3.72059	3.68328	3.73447	3.69837	3.6972	3.71326	3.68492	3.78239	3.67176	3.67298	3.73115	3.72052	3.86342	3.91177	3.84136	3.98542	3.92388	3.88612	5.00245	5.01419	4.99726	5.02297	5.14367	4.9572	3.86319	3.88041	3.23131	3.16999	3.70194	3.71001	3.71302	3.70822	3.87218	3.93181	5.00463	5.04128
ENSMUSG00000002871	Tpra1	4.84481	4.86038	4.80831	4.81619	4.88802	4.89184	4.66277	4.62647	4.55755	4.63875	4.93213	4.73104	4.32154	4.31997	4.2784	4.30748	4.34399	4.29992	4.34585	4.32585	4.3922	4.23539	4.28874	4.28261	4.71866	4.52612	4.59586	4.52466	4.61215	4.48095	5.89872	5.69705	5.94017	5.72836	5.7563	5.72336	4.83783	4.86535	4.6156	4.76731	4.32076	4.30996	4.35463	4.26892	4.61355	4.53925	5.84531	5.736
ENSMUSG00000002881	Nab1	4.82008	4.7145	4.83641	4.78277	4.73571	4.75217	4.63286	4.71524	4.72032	4.95824	4.82241	4.70843	4.42003	4.49317	4.57015	4.50385	4.58994	4.50108	4.32877	4.39416	4.24165	4.35169	4.38167	4.4147	4.6743	4.67403	4.72455	4.69277	4.65827	4.81298	5.66714	5.78443	5.7366	5.62499	5.69249	5.63993	4.79033	4.75688	4.68947	4.82969	4.4566	4.55465	4.32153	4.38269	4.69096	4.72134	5.72939	5.65247
ENSMUSG00000002897	Il17ra	5.02198	4.96244	4.84329	4.95564	4.95602	5.00683	4.53933	4.55742	4.58799	4.75658	4.59925	4.69205	4.23647	4.23777	4.25081	4.26008	4.28217	4.22715	4.19948	4.21696	4.19058	4.21497	4.11938	4.28931	4.88923	4.67795	4.84023	4.84657	4.66133	4.76537	5.42114	5.39531	5.48707	5.41822	5.53363	5.37139	4.94257	4.97283	4.56158	4.68263	4.23712	4.26435	4.20234	4.20789	4.80247	4.75776	5.43451	5.44108
ENSMUSG00000002900	Lamb1	8.0031	8.00239	7.97637	7.95736	7.96036	7.91476	7.7601	7.77581	7.5756	7.73941	7.49057	7.66871	7.62315	7.65373	7.7052	7.69824	7.67266	7.76783	7.6784	7.59051	7.7648	7.57777	7.54044	7.49356	8.20389	8.16363	8.2308	8.42466	8.18463	8.09861	9.14919	9.20705	9.00325	9.0693	9.08114	9.16433	7.99395	7.94416	7.70383	7.6329	7.63844	7.69203	7.6779	7.53726	8.19944	8.23597	9.11983	9.10492
ENSMUSG00000002908	Kcnn1	4.08428	3.98774	4.16251	3.99959	4.10572	4.03624	3.51176	3.53356	3.42919	3.48596	3.39714	3.55843	3.5697	3.58088	3.5224	3.56594	3.54959	3.58909	3.92925	3.89533	3.86696	3.89547	3.93779	3.80039	3.81622	3.74759	3.7757	3.76868	3.88259	3.8368	4.85175	4.93181	4.84802	4.85071	4.808	4.79078	4.07818	4.04718	3.4915	3.48051	3.57529	3.54598	3.89718	3.87788	3.77984	3.82936	4.87719	4.8165
ENSMUSG00000002910	Arrdc2	2.64748	2.53646	2.5802	2.58377	2.63264	2.59345	NA	NA	NA	NA	NA	NA	2.03139	2.03941	2.03659	2.07835	2.02506	2.06258	1.9055	1.90164	1.94229	1.95244	1.90916	1.96302	2.53453	2.54564	2.48156	2.57573	2.52744	2.52376	3.24753	3.2629	3.27614	3.28029	3.3483	3.2643	2.58805	2.60329	NA	NA	2.0354	2.04667	1.91648	1.94154	2.52058	2.54231	3.26219	3.29763
ENSMUSG00000002944	Cd36	2.0347	2.04634	2.09639	2.0544	2.08081	2.07427	2.09549	2.13529	2.13393	2.15689	2.08389	2.1135	2.30398	2.30061	2.30689	2.32264	2.35091	2.36098	2.05476	2.10648	2.06499	2.09411	2.12313	2.14996	2.83916	2.91761	2.91398	2.84993	2.8488	2.9073	3.32193	3.37343	3.34585	3.31345	3.29969	3.2857	2.05914	2.06983	2.12157	2.11809	2.30229	2.32681	2.07541	2.1224	2.89025	2.86868	3.34707	3.29961
ENSMUSG00000002949	Timm44	6.77761	6.85339	6.71581	6.68972	6.71314	6.74597	6.64064	6.35959	6.39462	6.50769	6.22785	6.43433	6.27591	6.35019	6.45039	6.41279	6.43398	6.35412	6.31447	6.26232	6.27786	6.15926	5.97869	6.18483	6.53306	6.34126	6.56361	6.32686	6.41438	6.52726	7.36875	7.44875	7.33652	7.34515	7.26927	7.37467	6.78227	6.71628	6.46495	6.38996	6.31305	6.43239	6.28488	6.10759	6.47931	6.42283	7.38467	7.3297
ENSMUSG00000002957	Ap2a2	10.4019	10.5605	10.4853	10.4736	10.4541	10.4428	10.2211	10.2422	10.251	10.2547	10.1816	10.1936	10.2076	10.1778	10.2254	10.2095	10.2767	10.3299	10.1299	10.2547	10.3155	10.2551	10.3241	10.1763	10.7118	10.8579	10.6937	10.7445	10.7173	10.7539	11.6775	11.5928	11.7417	11.9299	11.808	11.9386	10.4826	10.4568	10.2381	10.2099	10.1927	10.2372	10.2333	10.2518	10.7545	10.7386	11.6707	11.8922
ENSMUSG00000002963	Pnkp	4.47549	4.4224	4.47432	4.47779	4.46756	4.42132	4.44609	4.39608	4.38092	4.50292	4.45368	4.38278	4.36424	4.38127	4.34351	4.28051	4.32186	4.37064	4.25227	4.16996	4.28559	4.17914	4.26382	4.25808	4.45147	4.4938	4.42591	4.45275	4.39506	4.3853	5.54672	5.5018	5.66493	5.71156	5.70157	5.57494	4.4574	4.45555	4.40769	4.44646	4.37276	4.31529	4.23594	4.23368	4.45706	4.41103	5.57115	5.66269
ENSMUSG00000002968	Med25	6.0281	5.85222	5.83739	6.03458	5.95987	5.76678	5.50145	5.51567	5.53075	5.57988	5.53436	5.53157	5.6567	5.80086	5.67642	5.72786	5.7499	5.73631	5.69759	5.63644	5.55136	5.70871	5.65094	5.68988	5.65354	5.69051	5.77349	5.88317	5.58397	5.65473	6.57502	6.60007	6.63122	6.60601	6.72493	6.73574	5.9059	5.92041	5.51596	5.5486	5.72878	5.71806	5.62846	5.68318	5.70585	5.70729	6.6021	6.68889
ENSMUSG00000002981	Clptm1	9.85496	9.80218	9.79771	9.84592	9.80277	9.90071	9.53507	9.53385	9.51878	9.49465	9.46051	9.61421	9.41553	9.39707	9.37054	9.43721	9.31497	9.41699	9.56192	9.37588	9.58378	9.40642	9.29763	9.43123	10.0202	9.8789	9.97684	9.85326	9.94306	9.81445	10.7585	10.7005	10.7102	10.631	10.5236	10.668	9.81828	9.8498	9.52923	9.52312	9.4063	9.37424	9.50719	9.37843	9.95864	9.87026	10.7231	10.6075
ENSMUSG00000002983	Relb	3.62462	3.59576	3.52355	3.5802	3.60547	3.57166	3.17981	3.23612	3.20054	3.24418	3.1282	3.22485	3.47914	3.43408	3.43925	3.48784	3.43947	3.43066	3.14018	3.12593	3.14551	3.21645	3.10389	3.19555	3.20779	3.20563	3.21507	3.16547	3.25524	3.20927	4.62133	4.60862	4.63548	4.60342	4.76014	4.67254	3.58131	3.58577	3.20549	3.19908	3.45661	3.45552	3.13721	3.17196	3.2095	3.20999	4.62181	4.6787
ENSMUSG00000002984	Tomm40	6.77433	6.62168	6.56815	6.68559	6.67692	6.45614	5.96571	5.9524	5.91874	5.77038	5.80957	5.89264	6.26148	6.16702	6.1925	6.11075	6.1816	6.15824	6.22162	6.17372	6.15525	6.19562	6.38051	6.38585	6.26688	6.24807	6.29503	6.26718	6.2594	6.21689	7.2643	7.35779	7.23519	7.21463	7.17013	7.36991	6.65472	6.60622	5.94561	5.82419	6.21425	6.16161	6.18353	6.32066	6.27	6.24783	7.28576	7.25156
ENSMUSG00000002985	Apoe	5.34308	5.31074	5.51682	5.33167	5.45541	5.38183	5.77731	5.66169	5.41312	7.69856	5.68362	5.69172	4.60647	4.66263	4.76727	4.68412	4.61155	4.71285	5.16666	5.04116	5.10455	5.1354	5.06916	5.2437	5.6101	5.4878	5.48466	5.4816	5.49767	5.41466	7.2421	7.62448	8.5734	7.56194	8.68187	8.70675	5.39021	5.38963	5.61738	6.35797	4.63455	4.68765	5.10413	5.14942	5.52752	5.46464	7.81333	8.31685
ENSMUSG00000002996	Hbp1	5.26768	5.25252	5.2393	5.20742	5.24326	5.27158	4.86395	4.98381	4.91627	4.83854	4.96165	4.97986	4.56889	4.77726	4.7168	4.62435	4.57365	4.71923	4.81329	4.84053	4.86376	4.78477	4.86049	4.71156	5.34397	5.3421	5.3834	5.29541	5.16761	5.42418	6.30305	6.35242	6.33139	6.3802	6.36457	6.28728	5.25316	5.24076	4.92134	4.92669	4.67307	4.63827	4.83919	4.78561	5.35649	5.29573	6.32895	6.34402
ENSMUSG00000002997	Prkar2b	7.10496	7.22607	7.17786	7.12715	7.16519	7.40883	6.90505	6.85989	7.01796	6.94093	6.99456	7.18309	6.70354	6.79256	6.92748	6.95155	6.86162	6.88358	6.95114	6.89357	6.9104	6.80714	6.87721	6.87142	7.49453	7.44074	7.46135	7.21181	7.39888	7.39949	8.09159	7.96267	8.0797	8.05481	7.91963	8.045	7.16963	7.23372	6.92763	7.03953	6.74805	6.91355	6.91837	6.85192	7.46554	7.33672	8.04466	8.00648
ENSMUSG00000003031	Cdkn1b	6.36384	6.37611	6.43616	6.47597	6.3878	6.44352	6.32167	6.26095	6.21334	6.25368	6.10915	6.39971	6.14753	6.28289	6.20658	6.28433	6.24424	6.25167	6.19932	6.20238	6.22956	6.1	6.11402	6.23245	6.66248	6.64534	6.66979	6.65532	6.81286	6.65126	7.6199	7.60556	7.57702	7.45478	7.51024	7.60398	6.39204	6.43577	6.26532	6.25418	6.21521	6.24505	6.21042	6.14882	6.6592	6.70648	7.60083	7.523
ENSMUSG00000003033	Ap1m1	7.32945	7.59611	7.4079	7.57645	7.5416	7.37083	7.18728	7.20688	7.10693	6.81703	6.84707	7.07361	6.94344	7.259	7.14127	7.22824	7.18349	7.10328	7.276	7.23221	7.21621	7.23574	7.42038	7.30302	7.67526	7.77635	7.63989	7.79506	7.68268	7.62301	8.62949	8.5761	8.64885	8.62146	8.63765	8.70437	7.44449	7.49629	7.16703	6.91257	7.10122	7.18433	7.24147	7.31972	7.69717	7.70025	8.61815	8.65449
ENSMUSG00000003037	Rab8a	6.98129	6.88197	7.0162	6.9125	6.90279	6.97569	6.26511	6.41438	6.45741	6.38317	6.48176	6.55918	6.46876	6.35626	6.39636	6.32194	6.29707	6.36956	6.50397	6.3019	6.43803	6.27626	6.22235	6.271	7.00682	6.92721	6.99866	6.83571	6.9497	6.85527	7.78476	7.72205	7.60841	7.67008	7.69707	7.79222	6.95982	6.93033	6.37897	6.4747	6.41251	6.33846	6.41463	6.25654	6.97756	6.88023	7.70507	7.71979
ENSMUSG00000003039	Fam32a	6.52706	6.42117	6.31497	6.35821	6.37217	6.41579	5.8264	6.03743	5.84991	5.87013	6.00362	5.76694	6.26416	6.28256	6.13786	6.029	6.11124	6.34666	6.22044	5.90608	5.97817	6.01844	6.00879	6.1524	6.08936	5.92603	6.0426	5.90237	6.16025	5.99241	6.87984	6.87298	6.74389	6.68318	6.55041	6.71221	6.42106	6.38206	5.90458	5.88023	6.27336	6.0927	6.0349	6.05987	6.01933	6.01834	6.83224	6.6486
ENSMUSG00000003062	Stard3nl	6.27632	6.33253	6.25239	6.17197	6.22221	6.20122	5.73775	5.86193	5.87034	5.67162	5.91962	5.78516	5.50792	5.69167	5.76429	5.7122	5.66197	5.74224	5.91292	5.74952	5.98805	5.87315	5.88822	5.78913	6.24401	6.02488	6.14908	6.09407	6.0223	6.08725	7.16206	7.21681	7.13384	7.10959	7.15853	7.13579	6.28708	6.19847	5.82334	5.79213	5.5998	5.71282	5.8835	5.85017	6.13932	6.06787	7.17091	7.13464
ENSMUSG00000003068	Stk11	5.63542	5.53813	5.49811	5.53283	5.58028	5.49333	4.98844	4.81405	4.7759	4.83706	4.81691	4.8228	5.11925	5.13083	4.99941	5.13165	5.06515	5.11639	5.53037	5.35378	5.35355	5.38929	5.50422	5.48415	5.28583	5.261	5.25124	5.32801	5.19738	5.18185	6.20446	6.22876	6.18162	6.10754	6.18193	6.16956	5.55722	5.53548	4.85946	4.82559	5.12504	5.0654	5.41257	5.45922	5.26602	5.23574	6.20495	6.15301
ENSMUSG00000003070	Efna2	2.54311	2.57336	2.55274	2.52142	2.55311	2.56	NA	NA	NA	NA	NA	NA	2.29099	2.28945	2.26361	2.2711	2.28437	2.28009	NA	NA	NA	NA	NA	NA	NA	NA	NA	NA	NA	NA	3.21409	3.34046	3.27353	3.22815	3.25173	3.23273	2.5564	2.54484	NA	NA	2.29022	2.27303	NA	NA	NA	NA	3.27603	3.23754
ENSMUSG00000003072	Atp5d	9.23655	9.24452	9.14989	9.26355	9.317	9.16661	8.8835	8.94046	8.83675	8.97587	8.96787	9.06696	9.34317	8.98609	8.90913	9.16909	8.93551	9.07732	9.30808	8.96202	9.35405	9.17764	9.15776	8.9142	9.3482	9.39167	9.2881	9.21171	9.48319	9.14455	10.363	10.4168	10.4343	10.2872	10.2951	10.2033	9.21032	9.24905	8.8869	9.00357	9.16463	9.00458	9.20805	9.0832	9.34266	9.27982	10.4047	10.2619
ENSMUSG00000003099	Ppp5c	8.74203	8.6369	8.61773	8.64703	8.69148	8.54479	8.06324	8.27796	8.12062	8.02125	8.14823	8.27496	8.37978	8.29382	8.31744	8.21545	8.2934	8.35997	8.28401	8.27431	8.25069	8.40891	8.37135	8.4837	8.44565	8.58441	8.56683	8.51556	8.55058	8.46036	9.26027	9.41798	9.35609	9.22355	9.34399	9.30515	8.66555	8.62777	8.15394	8.14815	8.3368	8.27543	8.26967	8.42132	8.5323	8.50884	9.34478	9.2909
ENSMUSG00000003119	Cdk12	6.91251	6.95359	6.88172	6.80407	6.86796	7.08837	6.81711	6.7915	6.85853	6.73618	6.97716	6.81434	6.69659	6.50176	6.57147	6.59927	6.67361	6.55328	6.41538	6.45826	6.58113	6.48268	6.45678	6.45279	7.23623	7.06882	7.15202	7.23028	7.25001	7.14843	8.03485	8.0441	7.82207	7.74544	7.76976	7.84106	6.91594	6.92013	6.82238	6.84256	6.59918	6.61478	6.48492	6.46408	7.15236	7.20957	7.96701	7.78542
ENSMUSG00000003123	Lipe	2.35817	2.38526	2.39186	2.41973	2.40996	2.3434	2.24859	2.2408	2.19882	2.23885	2.22113	2.23382	2.78689	2.76337	2.75572	2.74728	2.74264	2.75979	2.63543	2.65138	2.6715	2.70789	2.67423	2.67742	2.25019	2.22801	2.25111	2.20574	2.25067	2.27918	3.61903	3.63868	3.68469	3.57778	3.57843	3.59807	2.37843	2.39103	2.2294	2.23127	2.77513	2.74855	2.65277	2.68651	2.2431	2.2452	3.64747	3.58476
ENSMUSG00000003131	Pafah1b2	9.54473	9.41575	9.40758	9.45334	9.38362	9.37554	9.11438	9.08178	9.05594	9.04158	9.21426	9.0982	9.11012	9.0464	9.10663	8.95423	8.9463	9.14679	8.86615	8.98773	8.96019	9.05197	9.06346	9.02263	9.32062	9.45843	9.43502	9.57034	9.37018	9.42235	10.1451	10.2789	10.1805	10.3592	10.3406	10.1704	9.45602	9.40417	9.08403	9.11801	9.07826	9.00238	8.93802	9.04602	9.40469	9.45429	10.2015	10.29
ENSMUSG00000003134	Tbc1d8	4.55053	4.47706	4.55453	4.50056	4.58457	4.51739	4.22212	4.18421	4.2245	4.1237	4.20618	4.30268	4.53804	4.53339	4.47076	4.54712	4.49612	4.54145	4.26633	4.38649	4.2904	4.2727	4.44203	4.40083	4.71484	4.55125	4.55996	4.61993	4.5096	4.51416	5.36214	5.21618	5.31757	5.31471	5.38089	5.34033	4.52737	4.53417	4.21028	4.21085	4.53572	4.50467	4.3144	4.37185	4.60868	4.54789	5.29863	5.34531
ENSMUSG00000003135	Cnot11	7.11134	7.15215	7.18118	7.15313	7.13453	7.13583	6.96547	6.85762	6.96323	7.1131	6.89633	6.93315	6.65178	6.71868	6.75776	6.69628	6.81783	6.76823	6.73159	6.76414	6.68801	6.81407	6.79423	6.71613	7.28892	7.26508	7.46535	7.44533	7.37938	7.35078	8.10644	8.1534	8.10965	8.15216	8.21771	8.14333	7.14822	7.14116	6.92877	6.98086	6.68523	6.75729	6.72792	6.77481	7.33978	7.39183	8.12316	8.17107
ENSMUSG00000003153	Slc2a3	8.66602	8.71975	8.71236	8.63852	8.65887	8.84665	8.69411	8.43634	8.39833	8.80614	8.57719	8.61246	8.39857	8.28168	8.34616	8.44257	8.37537	8.48818	8.58046	8.13617	8.65486	8.32022	8.16561	8.30029	8.95755	8.67384	8.8446	8.72482	8.88695	8.78463	9.95239	9.93054	9.93465	9.87446	9.83006	9.87332	8.69938	8.71468	8.50959	8.66527	8.34012	8.38803	8.45717	8.26204	8.82533	8.7988	9.93919	9.85928
ENSMUSG00000003154	Foxj2	6.55216	6.39743	6.30483	6.28004	6.32596	6.37711	6.26547	6.16143	6.02658	6.40993	6.31243	6.23846	5.86514	5.93059	5.89223	6.03609	5.90689	5.75871	5.67776	5.71014	5.8269	5.68187	5.53562	5.84221	6.29427	6.31522	6.27548	6.24784	6.31562	6.26758	7.32183	7.42946	7.33528	7.29538	7.34125	7.3126	6.41814	6.3277	6.15116	6.32028	5.89787	5.94507	5.73827	5.68657	6.29499	6.27701	7.36219	7.31641
ENSMUSG00000003161	Sri	7.10043	7.09398	7.09731	7.24756	7.01315	7.03463	6.73267	6.79494	6.8317	6.60518	6.4905	6.85845	7.0738	6.77051	6.77417	6.80784	6.93665	6.90826	7.10886	6.86999	7.19109	6.97975	6.97505	6.91654	7.26781	7.09064	7.18551	7.09184	7.21107	7.01254	8.10442	8.14323	8.40877	8.00367	8.02033	8.13168	7.09724	7.09845	6.78644	6.65138	6.92215	6.83955	7.05665	6.95711	7.18132	7.10515	8.21881	8.05189
ENSMUSG00000003166	Dgcr2	NA	NA	NA	NA	NA	NA	NA	NA	NA	NA	NA	NA	NA	NA	NA	NA	NA	NA	NA	NA	NA	NA	NA	NA	NA	NA	NA	NA	NA	NA	2.28926	2.28656	2.29117	2.27527	2.25685	2.29962	NA	NA	NA	NA	NA	NA	NA	NA	NA	NA	2.289	2.27725
ENSMUSG00000003184	Irf3	3.9989	4.11471	4.0582	3.99414	4.02949	4.07191	3.51545	3.55418	3.53203	3.5911	3.45786	3.47571	3.78087	3.84122	3.77328	3.80858	3.81348	3.80001	3.58772	3.59139	3.58186	3.55237	3.58889	3.63321	4.4927	4.57737	4.47796	4.55263	4.50536	4.49445	5.35445	5.34619	5.34114	5.28295	5.34662	5.20463	4.05727	4.03185	3.53389	3.50822	3.81105	3.79845	3.58699	3.59149	4.51601	4.51748	5.34726	5.27807
ENSMUSG00000003198	Zfp959	3.54496	3.55851	3.57557	3.59688	3.54699	3.61451	3.87205	3.81066	3.83365	3.8657	4.034	3.81306	3.39509	3.47501	3.39999	3.41627	3.36899	3.401	3.44717	3.40627	3.37646	3.4399	3.41912	3.34949	4.15152	4.23488	4.14243	4.09109	4.13116	4.18443	4.96054	4.88549	4.96187	5.0126	4.93238	4.95516	3.55968	3.58613	3.83879	3.90425	3.43505	3.39508	3.40997	3.40284	4.17628	4.13556	4.93597	4.96671
ENSMUSG00000003199	Mpnd	6.36008	6.3115	6.16252	6.38574	6.33898	6.13512	5.75376	5.87342	5.66749	5.68603	5.95457	5.86928	6.02548	5.99045	5.91352	6.1061	5.97247	5.8515	6.23312	6.08296	6.17784	6.17341	6.1014	6.29359	6.07979	6.12844	6.02237	6.10824	6.0945	5.97876	7.10971	7.06308	7.13696	6.92811	6.97267	7.02976	6.27803	6.28661	5.76489	5.83663	6.00796	5.99736	6.16464	6.18947	6.07687	6.0605	7.10325	6.97685
ENSMUSG00000003200	Sh3gl1	6.38515	6.36806	6.34642	6.20754	6.19141	6.23117	6.0482	6.00036	5.89828	5.85924	5.96875	5.94924	6.1926	6.17427	6.13656	6.11088	6.10511	6.20728	6.16779	5.9933	6.16657	6.10763	6.08453	6.12894	6.43078	6.65076	6.48866	6.46523	6.60485	6.42664	7.42941	7.4342	7.4281	7.60875	7.49638	7.48926	6.36654	6.21004	5.98228	5.92574	6.18343	6.11751	6.10922	6.10703	6.5234	6.49891	7.43057	7.53146
ENSMUSG00000003208	Yju2	4.20183	4.17624	4.25636	4.16694	4.14152	4.14998	3.71798	3.78606	3.7202	3.73647	3.71054	3.70956	4.16133	4.11453	4.22804	4.1556	4.22402	4.21155	4.00383	3.90959	3.97384	3.92517	3.89484	4.03138	3.98502	3.87419	3.89692	3.97093	3.9466	3.82349	4.74797	4.76641	4.72615	4.64322	4.66911	4.67764	4.21148	4.15281	3.74141	3.71886	4.13793	4.20255	3.96242	3.95046	3.91871	3.91367	4.74684	4.66333
ENSMUSG00000003226	Ranbp2	9.93196	10.0785	10.1195	10.1524	10.0855	10.011	9.7823	9.82759	10.0165	10.0207	9.85739	9.62076	9.63182	9.73507	9.81468	9.58118	9.68388	9.73042	9.2259	9.73566	9.39931	9.52009	9.63875	9.50034	10.2936	10.4912	10.3287	10.4443	10.2585	10.5076	11.2166	10.8824	11.0092	11.1935	11.2588	11.2433	10.0433	10.083	9.87545	9.83295	9.68345	9.69325	9.45362	9.55306	10.3712	10.4035	11.0361	11.2319
ENSMUSG00000003228	Grk5	3.55151	3.52267	3.52556	3.46977	3.49792	3.45105	2.92915	2.94032	2.98472	2.92965	2.94452	2.96521	3.03348	3.05705	2.99818	3.06085	3.0772	3.05121	2.46697	2.50966	2.5392	2.46494	2.52034	2.55616	3.51723	3.39113	3.54031	3.52069	3.49848	3.48719	4.00945	4.0136	4.06206	4.01178	4.02195	4.03993	3.53325	3.47291	2.9514	2.94646	3.04526	3.04541	2.50528	2.51382	3.48289	3.50212	4.02837	4.02455
ENSMUSG00000003233	Dvl3	5.8761	5.78319	5.81167	5.63572	5.84773	5.78209	5.63155	5.66674	5.5756	5.82317	5.60891	5.80581	5.63261	5.5106	5.58039	5.66549	5.53998	5.54254	5.6923	5.61922	5.71996	5.65766	5.72267	5.72806	6.01743	5.96941	6.11357	6.19158	6.07	5.95568	6.83781	6.97965	6.92581	6.91652	6.91227	6.83656	5.82366	5.75518	5.62463	5.74596	5.5716	5.59529	5.67716	5.7028	6.03347	6.07242	6.91443	6.88845
ENSMUSG00000003234	Abcf3	7.51128	7.52759	7.46665	7.5638	7.49207	7.56858	7.13226	7.11996	7.07866	6.9292	7.00805	7.07378	7.0739	7.07958	7.18072	7.15243	7.02569	7.09256	7.26926	7.22408	7.23887	7.33037	7.13747	7.34298	7.48655	7.6013	7.51954	7.40329	7.49795	7.45302	8.49988	8.4064	8.45999	8.40918	8.3954	8.45432	7.50184	7.54149	7.11029	7.00368	7.07674	7.11962	7.24407	7.27027	7.5358	7.45142	8.45542	8.41963
ENSMUSG00000003235	Eif2b5	6.63372	6.54503	6.68686	6.64789	6.68649	6.47743	6.11737	6.12211	6.07587	6.09866	6.04594	6.05609	6.36357	6.28328	6.2508	6.27296	6.24288	6.16573	5.95004	5.81293	5.84541	5.95806	5.7719	5.9352	6.5585	6.50592	6.58811	6.5593	6.50845	6.4567	7.4782	7.52395	7.40357	7.4142	7.46564	7.478	6.62187	6.60394	6.10511	6.0669	6.32343	6.25555	5.86946	5.88838	6.55084	6.50815	7.46857	7.45261
ENSMUSG00000003269	Cyth2	8.2804	8.13982	8.04397	8.18094	8.13128	8.19407	7.83685	7.88383	7.79912	7.83443	7.78777	7.80927	7.9589	7.89964	7.87473	7.83184	7.87511	7.75949	7.92669	7.73276	7.74447	7.76797	7.95113	7.86683	8.12151	8.04711	8.36744	8.37135	8.2866	8.22222	9.09162	9.03719	8.89592	8.94	9.02401	9.14138	8.15473	8.16876	7.83993	7.81049	7.92927	7.86056	7.8013	7.86198	8.17869	8.29339	9.00824	9.03513
ENSMUSG00000003271	Sult2b1	5.49172	5.47912	5.4944	5.46796	5.55741	5.48226	5.23707	5.202	5.14309	5.21274	5.32671	5.1931	4.92509	4.91707	4.93209	4.99559	5.00672	4.97486	5.02812	5.07683	5.01546	5.08583	4.99976	5.04861	5.78306	5.86286	5.86574	5.77777	5.83403	5.75345	6.43285	6.6055	6.58502	6.68026	6.71735	6.64422	5.48841	5.50254	5.19405	5.24418	4.92108	4.97813	5.04014	5.04473	5.83722	5.78842	6.54112	6.68061
ENSMUSG00000003273	Car11	7.54996	7.30488	7.34469	7.36116	7.47234	7.29856	7.07104	7.03307	6.82196	6.85904	6.91779	7.07315	7.09836	7.10416	6.97495	7.07722	6.85075	7.04457	7.10587	7.11678	7.1203	7.13597	7.06192	7.21991	7.03835	6.7263	6.97187	6.99874	6.952	6.8593	7.78243	8.0171	7.88119	7.85782	7.91647	7.73561	7.39984	7.37735	6.97536	6.94999	7.10126	6.96764	7.11431	7.13927	6.91217	6.93668	7.89357	7.83663
ENSMUSG00000003279	Dlgap1	10.7104	10.6453	10.5262	10.6015	10.6625	10.4347	10.4089	10.3115	10.2476	10.2589	10.2035	10.1048	10.4845	10.3702	10.3588	10.4101	10.3457	10.3598	10.2137	10.2936	10.1288	10.4101	10.3471	10.399	10.5842	10.7309	10.5831	10.7315	10.5206	10.6473	11.4086	11.4713	11.4986	11.6028	11.6396	11.5785	10.6273	10.5662	10.3226	10.1891	10.4274	10.3715	10.212	10.3854	10.6327	10.6331	11.4595	11.607
ENSMUSG00000003282	Plag1	NA	NA	NA	NA	NA	NA	NA	NA	NA	NA	NA	NA	NA	NA	NA	NA	NA	NA	NA	NA	NA	NA	NA	NA	NA	NA	NA	NA	NA	NA	1.97489	1.93964	1.97738	1.95433	1.95173	1.96607	NA	NA	NA	NA	NA	NA	NA	NA	NA	NA	1.96397	1.95738
ENSMUSG00000003299	Mrpl4	6.35384	6.31766	6.33219	6.30272	6.4358	6.20414	5.73333	5.95459	5.69857	5.78679	5.66391	5.69466	6.11669	6.03865	6.05559	6.12012	6.07162	6.00494	6.18904	6.03221	6.10603	6.21876	6.20774	6.07738	5.89847	5.80894	6.03263	5.87689	5.99631	5.86482	6.84049	7.04123	6.9852	6.80845	6.81969	7.00194	6.33456	6.31422	5.79549	5.71512	6.07767	6.08244	6.10909	6.16796	5.91334	5.91267	6.95564	6.87669
ENSMUSG00000003308	Keap1	6.85615	6.76601	6.78734	6.816	6.79019	6.71472	6.17103	6.07046	6.0201	6.15553	5.88767	5.99051	6.56619	6.47227	6.59301	6.59166	6.48068	6.56147	6.44471	6.49899	6.45085	6.59317	6.55082	6.6595	6.67189	6.75555	6.77755	6.73981	6.71891	6.73145	7.63348	7.67737	7.75318	7.72581	7.71987	7.72896	6.80317	6.77364	6.0872	6.01124	6.51923	6.55512	6.46485	6.60116	6.735	6.73006	7.68801	7.72488
ENSMUSG00000003309	Ap1m2	1.51235	1.52829	1.53451	1.56512	1.54289	1.56524	NA	NA	NA	NA	NA	NA	NA	NA	NA	NA	NA	NA	NA	NA	NA	NA	NA	NA	NA	NA	NA	NA	NA	NA	NA	NA	NA	NA	NA	NA	1.52505	1.55775	NA	NA	NA	NA	NA	NA	NA	NA	NA	NA
ENSMUSG00000003316	Glg1	11.1608	11.0841	11.0624	11.0942	11.0689	11.1191	10.7918	10.8163	10.7736	10.654	10.7515	10.9113	10.6831	10.69	10.6178	10.5907	10.6209	10.6694	10.6576	10.6088	10.7976	10.5732	10.5312	10.5638	11.2195	10.9648	11.0493	11.0798	11.1376	11.0105	11.9543	11.8393	11.8079	11.764	11.5777	11.7768	11.1024	11.0941	10.7939	10.7722	10.6866	10.6098	10.688	10.5561	11.0779	11.076	11.8671	11.7062
ENSMUSG00000003344	Btbd2	6.87818	6.60318	6.50748	6.75026	6.79198	6.50542	6.28604	6.19329	6.03174	6.28165	5.90804	6.13351	6.47036	6.40538	6.23419	6.43826	6.4098	6.42207	6.60701	6.42792	6.36431	6.60374	6.66016	6.58166	6.51288	6.65323	6.41001	6.59104	6.52362	6.46212	7.50146	7.79474	7.67763	7.53146	7.72785	7.65366	6.66295	6.68255	6.17036	6.10773	6.43787	6.36075	6.46641	6.61518	6.52537	6.5256	7.65794	7.63766
ENSMUSG00000003345	Csnk1g2	6.38593	6.17637	6.29151	6.23645	6.28115	6.06914	5.87273	5.4091	5.59771	5.64575	5.66896	5.50999	6.11657	6.09211	5.96593	5.90756	5.92991	5.98944	5.69812	5.63875	5.69558	5.75284	5.90069	5.9306	5.9444	5.92032	5.80417	5.86961	5.94572	5.85187	6.69302	6.84127	6.7134	6.93088	6.94084	6.95286	6.2846	6.19558	5.62651	5.60823	6.10434	5.93447	5.67748	5.86138	5.88963	5.88907	6.74923	6.94153
ENSMUSG00000003346	Abhd17a	5.71775	5.74687	5.61129	5.79606	5.72509	5.52709	5.49969	5.26171	5.37029	5.53573	5.27231	5.19532	5.66464	5.64656	5.43618	5.6398	5.53009	5.62157	5.51761	5.57118	5.54246	5.5949	5.7966	5.59836	5.54236	5.71628	5.59599	5.63832	5.66161	5.56995	6.5647	6.79224	6.68976	6.73014	6.68426	6.63569	5.69197	5.68275	5.37723	5.33445	5.6556	5.53536	5.54375	5.66328	5.61821	5.62329	6.68223	6.68336
ENSMUSG00000003348	Mob3a	2.92594	2.8778	2.9018	2.91239	2.94568	2.91259	3.12594	2.98989	2.94106	3.05746	3.0504	3.0082	2.75132	2.68662	2.7663	2.72714	2.78713	2.70982	2.67182	2.79921	2.7323	2.69153	2.72583	2.72034	3.46632	3.46888	3.50258	3.42003	3.45046	3.47005	3.74619	3.75072	3.70617	3.72729	3.72521	3.72217	2.90185	2.92356	3.01896	3.03868	2.71897	2.76019	2.73444	2.71257	3.47926	3.44685	3.73436	3.72489
ENSMUSG00000003352	Cacnb3	7.76386	7.7763	7.56814	7.75168	7.778	7.54992	7.21051	7.25974	7.2297	7.39152	7.01964	7.15709	7.62333	7.5634	7.5238	7.51302	7.59803	7.52312	7.30163	7.38057	7.47754	7.49169	7.49767	7.58841	7.58242	7.79188	7.486	7.78758	7.59097	7.63861	8.35253	8.55231	8.60637	8.48121	8.59558	8.50375	7.70277	7.6932	7.23332	7.18942	7.59336	7.54495	7.38658	7.52592	7.6201	7.67239	8.50374	8.52685
ENSMUSG00000003354	Ccdc65	5.02673	5.11299	5.02419	5.01635	5.05091	5.19242	4.62811	4.58322	4.64105	4.48128	4.64555	4.71721	4.41476	4.40738	4.45939	4.53727	4.4796	4.37224	4.59268	4.58224	4.53887	4.58761	4.63604	4.64142	5.17944	5.23313	5.2434	5.2689	5.03828	5.11074	5.44433	5.29193	5.43806	5.32391	5.29594	5.29965	5.05464	5.08656	4.61746	4.61468	4.41107	4.49209	4.57126	4.62169	5.21866	5.13931	5.39144	5.3065
ENSMUSG00000003355	Fkbp11	NA	NA	NA	NA	NA	NA	NA	NA	NA	NA	NA	NA	NA	NA	NA	NA	NA	NA	NA	NA	NA	NA	NA	NA	NA	NA	NA	NA	NA	NA	2.06387	2.037	2.04587	2.05895	2.0404	2.06485	NA	NA	NA	NA	NA	NA	NA	NA	NA	NA	2.04891	2.05473
ENSMUSG00000003360	Ddx23	7.81464	7.48411	7.68352	7.57085	7.66672	7.65583	7.56399	7.37931	7.37408	7.35437	7.69578	7.33937	7.39283	7.30366	7.20537	7.33418	7.24851	7.20712	7.31102	7.27247	7.29075	7.2969	7.27054	7.48981	7.93347	7.70756	7.67983	7.85924	7.79288	7.63769	8.74092	8.63113	8.6444	8.53577	8.48984	8.61276	7.66076	7.63113	7.43913	7.46318	7.34824	7.26269	7.29141	7.35242	7.77362	7.76327	8.67215	8.54612
ENSMUSG00000003363	Pld3	11.8829	11.6498	11.5925	11.6827	11.6763	11.6587	11.3405	11.3376	11.1148	11.2595	11.3905	11.3744	11.2944	11.2175	11.1884	11.3238	11.1773	11.2622	11.442	11.1866	11.4514	11.3641	11.2035	11.4717	11.6458	11.4053	11.5361	11.4758	11.5798	11.3387	12.3443	12.5354	12.3374	12.188	12.1811	12.1984	11.7084	11.6726	11.2643	11.3415	11.256	11.2298	11.36	11.3464	11.5291	11.4648	12.4057	12.1892
ENSMUSG00000003378	Grik5	7.35369	7.38466	7.06329	7.34884	7.3704	7.1018	6.98598	6.92908	6.86374	7.15663	7.07652	6.79886	7.01262	7.07484	7.02892	7.06969	6.96413	7.03939	7.1208	6.95496	7.01116	7.03425	7.17736	7.06792	7.11839	6.99574	7.00189	7.25665	7.12839	7.05798	8.12059	8.41138	8.17396	8.25324	8.50285	8.3284	7.26721	7.27368	6.92627	7.01067	7.04373	7.02091	7.02897	7.09317	7.03867	7.14767	8.23531	8.3615
ENSMUSG00000003380	Rabac1	7.95429	7.89082	7.64675	7.8854	7.77083	7.72972	7.36563	7.27986	7.13139	7.20444	7.11834	7.34536	7.38426	7.43653	7.36701	7.53672	7.35299	7.39325	7.59879	7.60438	7.51727	7.6795	7.71119	7.70954	7.51054	7.62281	7.75312	7.6455	7.60798	7.58007	8.55573	8.72016	8.66612	8.57867	8.53828	8.6038	7.83062	7.79532	7.25896	7.22271	7.41039	7.4189	7.57348	7.70008	7.62882	7.61118	8.64733	8.57358
ENSMUSG00000003382	Etv3	4.77277	4.87024	4.74116	4.82638	4.83855	4.69449	4.37203	4.39518	4.36257	4.48162	4.40602	4.4031	4.20406	4.26767	4.25564	4.24835	4.28459	4.20545	4.31891	4.3332	4.30654	4.3615	4.35751	4.36691	4.78	4.82484	4.77834	4.76683	4.76728	4.83006	5.83548	5.85758	5.82235	5.92466	6.00743	6.0034	4.79472	4.78648	4.37659	4.43025	4.23587	4.26286	4.31955	4.36197	4.79439	4.78806	5.83847	5.9785
ENSMUSG00000003402	Prkcsh	8.60976	8.34465	8.48235	8.36744	8.39583	8.3225	8.22516	8.06649	7.92264	8.10527	8.17923	8.06252	8.23674	8.11145	8.05906	8.13345	8.07757	8.26434	8.37353	8.0241	8.34758	8.09642	8.14368	8.24658	8.36086	8.2163	8.30209	8.27421	8.47026	8.14592	9.29949	9.43776	9.31655	9.1834	9.1324	9.26185	8.47892	8.36193	8.07143	8.11567	8.17409	8.09003	8.2484	8.16223	8.29308	8.2968	9.35127	9.19255
ENSMUSG00000003410	Elavl3	7.96748	7.96039	7.84576	7.99186	8.0404	7.84107	7.57559	7.49859	7.38057	7.60094	7.47206	7.52545	7.64822	7.69179	7.63014	7.71075	7.74579	7.74279	7.53732	7.62624	7.50303	7.58251	7.50828	7.66842	8.05171	8.1573	8.01817	8.14439	8.17466	7.99146	8.94345	9.15927	9.00498	8.92759	8.97355	8.9273	7.92455	7.95778	7.48492	7.53281	7.67001	7.69556	7.55553	7.5864	8.07573	8.1035	9.0359	8.94281
ENSMUSG00000003411	Rab3b	6.46601	6.73181	6.41896	6.58412	6.83152	6.99552	6.7868	6.47867	6.65655	6.48078	6.81673	6.99119	6.2874	6.17475	6.16821	6.45373	6.34404	6.42871	6.383	6.57479	6.43816	6.27243	6.19652	6.68766	7.09906	6.73009	6.85521	6.48799	6.60583	6.76858	7.43429	6.69704	7.37168	7.15265	6.80289	6.79861	6.53893	6.80372	6.64067	6.7629	6.23107	6.32199	6.46532	6.38553	6.89479	6.6208	7.16767	6.91805
ENSMUSG00000003418	St8sia6	3.68529	3.6369	3.64657	3.63044	3.67153	3.62167	3.55716	3.53071	3.54674	3.56149	3.58685	3.62108	3.26239	3.28059	3.31352	3.34074	3.27792	3.23792	2.7683	2.78798	2.87401	2.81367	2.7601	2.75403	3.80646	3.78811	3.76628	3.7152	3.80533	3.88219	4.46143	4.58821	4.45683	4.42691	4.36579	4.37976	3.65625	3.64121	3.54487	3.58981	3.27149	3.31073	2.8101	2.77594	3.78695	3.80091	4.50216	4.39082
ENSMUSG00000003421	Nosip	6.6861	6.57034	6.55404	6.71186	6.57544	6.47755	6.49755	6.46733	6.28539	6.64866	6.37895	6.53399	6.64226	6.5042	6.53453	6.53786	6.51344	6.62871	6.39969	6.21862	6.31538	6.32578	6.22404	6.45051	6.67529	6.76376	6.72936	6.69189	6.78832	6.69679	7.70369	7.87013	7.89695	7.80596	7.73655	7.80003	6.60349	6.58829	6.41676	6.52054	6.57323	6.52861	6.31123	6.33345	6.7228	6.72566	7.82359	7.78085
ENSMUSG00000003423	Pih1d1	6.04479	5.95882	5.88341	5.92451	5.95921	5.97256	5.60531	5.64457	5.60796	5.65651	5.59064	5.68769	5.88016	5.82886	5.69406	5.82169	5.75888	5.75757	6.07211	5.87756	5.94248	5.98279	6.05818	5.9735	6.21582	6.38538	6.3202	6.28059	6.26564	6.19703	7.28229	7.35757	7.4966	7.51014	7.45408	7.43663	5.96234	5.95209	5.61928	5.64495	5.85451	5.75821	5.96405	6.00482	6.30713	6.24775	7.37882	7.46695
ENSMUSG00000003429	Rps11	7.21831	7.28597	7.27672	7.31812	7.28048	7.20139	7.35933	7.08807	7.16664	7.26806	7.15602	7.3231	6.96248	7.07518	7.02235	7.04455	7.08819	6.92963	6.93129	7.1032	6.80329	6.8633	7.00059	6.97385	7.19464	7.27584	7.1396	7.23879	7.22722	7.22922	7.77682	8.29627	7.95475	8.00447	7.99398	7.96723	7.26033	7.26666	7.20468	7.24906	7.01883	7.0517	6.94593	6.94592	7.20336	7.23174	8.00928	7.98856
ENSMUSG00000003435	Supt5	8.92758	8.97176	9.02828	9.01179	8.95066	8.90887	8.58586	8.69553	8.62173	8.57605	8.7436	8.6557	8.83481	8.74144	8.61926	8.72851	8.64124	8.75422	8.68959	8.62842	8.6574	8.70422	8.86621	8.73551	9.15122	9.0825	8.98619	9.11672	8.98252	8.96233	10.0758	9.85298	9.94376	9.91873	9.85875	9.88822	8.97587	8.95711	8.63437	8.65845	8.78813	8.663	8.65847	8.76865	9.0733	9.02052	9.9575	9.88857
ENSMUSG00000003437	Paf1	7.85389	8.01875	8.14121	7.98625	7.94565	7.97801	7.73741	7.76165	7.71684	7.77977	7.69216	7.70049	7.64778	7.66117	7.62712	7.61639	7.64784	7.75055	7.82994	7.6542	7.63446	7.73022	7.84276	7.72445	8.20167	8.35977	8.17226	8.31197	8.24545	8.25434	9.04477	9.04839	9.12002	9.24235	9.29395	9.19338	8.00461	7.96997	7.73863	7.72414	7.65448	7.63045	7.7062	7.76581	8.24456	8.27059	9.07106	9.24323
ENSMUSG00000003438	Timm50	6.0179	6.02655	5.99208	6.02581	5.97109	5.93335	5.90225	5.97093	5.9631	6.09608	6.56023	5.99775	5.81169	5.86312	5.86397	5.78425	5.88466	5.95048	5.75853	5.73747	5.75025	5.77707	5.72338	5.76063	6.25244	6.16521	6.28341	6.07417	6.19831	6.16053	6.96174	7.10344	7.05622	6.99161	6.88985	7.04399	6.01218	5.97675	5.94543	6.21802	5.8374	5.84429	5.74875	5.75369	6.23369	6.14434	7.04046	6.97515
ENSMUSG00000003444	Med29	3.19336	3.12895	3.16373	3.15351	3.22756	3.15373	2.44127	2.48674	2.49515	2.41367	2.44831	2.49645	3.24525	3.1973	3.22376	3.23324	3.2017	3.22517	3.38135	3.33594	3.35549	3.31143	3.3827	3.33855	3.48417	3.38283	3.40165	3.37367	3.40074	3.3466	4.48604	4.48215	4.43576	4.52152	4.42183	4.43126	3.16201	3.17827	2.47439	2.45281	3.22128	3.21957	3.35759	3.34423	3.42288	3.37367	4.46798	4.4582
ENSMUSG00000003452	Bicd1	7.43146	7.43297	7.47887	7.4319	7.42926	7.62206	7.14726	7.13201	7.17386	7.22497	7.23972	7.10513	7.01444	6.98639	7.14117	7.08248	7.15044	6.9103	6.78179	6.92965	6.85181	6.94498	6.81937	6.82371	7.45474	7.28901	7.30329	7.21205	7.28008	7.42124	8.33192	8.16973	8.29062	8.30346	8.36083	8.38268	7.44777	7.4944	7.15104	7.18994	7.00041	7.1247	6.85442	6.86269	7.34901	7.30445	8.26409	8.34899
ENSMUSG00000003458	Ncstn	8.19836	8.30276	8.28672	8.21845	8.34537	8.42048	8.2241	8.07793	8.14342	8.03531	8.22053	8.27653	7.83914	8.01052	7.81517	7.97334	7.85735	7.83009	8.03943	7.978	8.05146	8.02672	7.9645	7.96709	8.54915	8.37607	8.38221	8.38741	8.4309	8.34843	9.10355	9.27991	9.16406	9.06704	8.95152	9.18279	8.26261	8.3281	8.14849	8.17745	7.92483	7.88196	8.02296	7.98611	8.43581	8.38891	9.18251	9.06712
ENSMUSG00000003464	Pex19	7.27052	7.18681	7.01473	7.21655	7.25083	7.21815	6.86025	6.89779	6.77842	6.87842	6.83717	6.75417	6.84795	6.93439	6.87219	6.88906	6.88893	6.88956	6.98785	6.86431	6.79373	6.85481	6.91805	7.05542	7.14551	7.19151	7.29476	7.14347	7.19821	7.16866	7.85136	8.3413	8.1597	8.05886	8.26578	8.20521	7.15736	7.22851	6.84549	6.82325	6.89117	6.88339	6.88197	6.94276	7.21059	7.17011	8.11745	8.17661
ENSMUSG00000003469	Phyhip	10.83	10.945	10.8213	10.9332	10.8844	10.8702	10.7257	10.727	10.7206	10.8528	10.5739	10.7202	10.709	10.7011	10.6899	10.6675	10.6232	10.7112	10.6069	10.6701	10.5013	10.7105	10.6618	10.5199	10.9916	11.3142	11.2034	11.1469	11.0435	11.1558	11.9122	12.0905	11.9237	12.0292	11.8817	11.9035	10.8654	10.8959	10.7244	10.7156	10.705	10.6602	10.5928	10.6307	11.1698	11.1154	11.9755	11.9381
ENSMUSG00000003476	Crhr2	NA	NA	NA	NA	NA	NA	NA	NA	NA	NA	NA	NA	NA	NA	NA	NA	NA	NA	NA	NA	NA	NA	NA	NA	1.9308	1.91903	1.96346	1.89727	1.88492	1.88401	1.82228	1.84417	1.80725	1.87171	1.80794	1.8168	NA	NA	NA	NA	NA	NA	NA	NA	1.93776	1.88874	1.82457	1.83215
ENSMUSG00000003500	Impdh1	6.71241	6.72547	6.64601	6.554	6.59857	6.64235	6.16741	6.09846	6.20304	6.27187	6.1441	6.26924	6.31868	6.13411	6.28335	6.27282	6.31305	6.2108	6.44331	6.30222	6.30187	6.28718	6.41941	6.42421	6.65003	6.67363	6.47459	6.4422	6.41285	6.62262	7.5042	7.25895	7.44577	7.40665	7.46991	7.34523	6.69463	6.59831	6.1563	6.2284	6.2264	6.28974	6.34913	6.37693	6.59942	6.49256	7.40297	7.40727
ENSMUSG00000003518	Dusp3	7.7478	7.80546	7.77961	7.82493	7.8241	7.73427	7.50937	7.48209	7.36237	7.48159	6.90545	7.52594	7.63244	7.54064	7.53814	7.52795	7.61407	7.51786	7.48332	7.49187	7.52483	7.6499	7.48791	7.55892	7.71025	7.70332	7.65625	7.54722	7.50571	7.65401	8.5892	8.73351	8.80597	8.50248	8.6259	8.69855	7.77762	7.79443	7.45128	7.30433	7.58654	7.56005	7.50001	7.56558	7.68994	7.56898	8.70956	8.60898
ENSMUSG00000003526	Prodh	NA	NA	NA	NA	NA	NA	NA	NA	NA	NA	NA	NA	NA	NA	NA	NA	NA	NA	NA	NA	NA	NA	NA	NA	NA	NA	NA	NA	NA	NA	2.19805	2.20089	2.16836	2.14891	2.16242	2.18737	NA	NA	NA	NA	NA	NA	NA	NA	NA	NA	2.1891	2.16623
ENSMUSG00000003527	Ess2	5.38547	5.3458	5.31075	5.37632	5.33659	5.33647	4.93619	4.98873	4.81945	4.91619	4.89773	5.06127	5.29648	5.20042	5.17936	5.05809	5.10258	5.11371	5.0844	5.02846	4.90341	5.04013	5.12577	5.05193	5.17132	5.16155	5.22965	5.17284	5.23511	5.18818	6.16571	6.25949	6.14326	6.22816	6.27309	6.18466	5.34734	5.34979	4.91479	4.9584	5.24845	5.11334	5.00542	5.07261	5.18751	5.19871	6.18949	6.22864
ENSMUSG00000003528	Slc25a1	5.31363	5.30298	5.39221	5.30109	5.36711	5.36415	4.91373	4.81136	4.87522	4.85644	5.00779	4.88997	4.79227	4.99061	4.93736	4.91237	4.89425	4.96095	4.82206	4.84457	4.93464	4.88029	5.02293	5.07711	5.06602	4.98837	5.00906	5.05345	5.05023	5.05193	6.10659	6.29042	6.1697	6.10753	6.24293	6.1116	5.33627	5.34412	4.86677	4.91807	4.89144	4.91466	4.86709	4.99344	5.02115	5.05187	6.1889	6.15402
ENSMUSG00000003531	Dgcr6	5.15551	5.09994	4.94882	5.12578	5.03978	5.01164	4.21611	4.33607	4.31219	4.26142	4.27226	4.30471	4.42334	4.43666	4.46314	4.47662	4.43316	4.40262	4.61683	4.5961	4.70386	4.63629	4.69969	4.67659	4.97248	4.86393	5.01082	5.09453	5.01703	4.9531	5.58767	5.66081	5.71576	5.5237	5.68915	5.6985	5.06809	5.05907	4.28812	4.27946	4.43	4.45764	4.63893	4.67085	4.94908	5.02156	5.65475	5.63712
ENSMUSG00000003534	Ddr1	5.45865	5.48345	5.48177	5.4649	5.49565	5.40415	5.25078	5.14378	5.12866	5.26128	5.02515	5.26719	4.97181	4.96169	4.9516	4.9745	5.00102	5.03254	5.28709	5.13307	5.20915	5.18785	5.13731	5.20947	5.49337	5.4546	5.45387	5.52647	5.49069	5.38153	6.39166	6.41193	6.45169	6.47007	6.65307	6.52622	5.47462	5.4549	5.17441	5.18454	4.96675	4.97571	5.20977	5.17821	5.46728	5.46623	6.41843	6.54979
ENSMUSG00000003541	Ier3	NA	NA	NA	NA	NA	NA	NA	NA	NA	NA	NA	NA	NA	NA	NA	NA	NA	NA	NA	NA	NA	NA	NA	NA	2.09453	2.11948	2.05781	2.10236	2.08061	2.09327	2.54696	2.58332	2.54831	2.5395	2.52825	2.54683	NA	NA	NA	NA	NA	NA	NA	NA	2.09061	2.09208	2.55953	2.53819
ENSMUSG00000003545	Fosb	3.18075	3.15552	3.11963	3.08469	3.24137	3.15994	4.0056	3.92816	3.8319	4.19408	3.83356	3.96174	3.64465	3.60229	3.63124	3.65667	3.65407	3.57342	3.3513	3.32469	3.32462	3.31019	3.39636	3.38904	3.97402	3.87785	3.87314	3.94293	4.01162	4.00203	5.24808	5.1445	5.16933	5.37783	5.4052	5.49004	3.15197	3.162	3.92189	3.99646	3.62347	3.64733	3.33354	3.3652	3.90834	3.98553	5.1873	5.42436
ENSMUSG00000003546	Klc4	4.43423	4.47472	4.55288	4.45591	4.56278	4.5054	4.17974	4.06134	4.04271	4.26248	4.13116	4.08877	4.5161	4.43669	4.40848	4.38992	4.34607	4.34672	4.44534	4.34726	4.33825	4.33498	4.33807	4.40251	4.59595	4.59727	4.61995	4.65576	4.59949	4.55814	5.49211	5.52653	5.59321	5.5045	5.46906	5.56931	4.48727	4.50803	4.0946	4.1608	4.47639	4.38149	4.37695	4.35852	4.60439	4.60446	5.53728	5.51429
ENSMUSG00000003549	Ercc1	5.6574	5.67275	5.64249	5.72082	5.66588	5.62787	5.44122	5.34097	5.50692	5.51405	5.65957	5.51735	5.21937	5.24124	5.05916	5.1575	5.20554	5.12151	5.53312	5.48627	5.4084	5.35725	5.50698	5.34394	5.92882	5.94217	6.08549	6.10884	6.08158	5.87581	6.73941	6.66225	6.70149	6.69547	6.69018	6.66441	5.65755	5.67153	5.4297	5.56366	5.23031	5.14073	5.47593	5.40272	5.98549	6.02208	6.70105	6.68335
ENSMUSG00000003559	As3mt	2.71809	2.62179	2.68589	2.60882	2.6436	2.64929	2.28539	2.22907	2.32764	2.25315	2.41343	2.31151	1.85995	1.84673	1.84066	1.877	1.88932	1.81804	1.78504	1.80737	1.82762	1.85864	1.80373	1.84338	NA	NA	NA	NA	NA	NA	3.64776	3.62839	3.57023	3.66568	3.69627	3.67306	2.67526	2.6339	2.2807	2.32603	1.85334	1.86899	1.80668	1.83525	NA	NA	3.61546	3.67834
ENSMUSG00000003573	Homer3	5.75515	5.60058	5.67802	5.6478	5.66454	5.54831	4.96618	5.0608	4.96734	4.86928	4.86657	5.02669	5.12281	5.25835	5.23551	5.31158	5.15167	5.23195	5.86902	5.56645	5.8158	5.7107	5.86883	5.69165	5.42461	5.63914	5.57105	5.5734	5.65773	5.53849	6.97638	7.20983	7.07623	7.10662	7.17013	7.19539	5.67792	5.62022	4.99811	4.92085	5.19058	5.23292	5.75042	5.75706	5.54494	5.58987	7.08748	7.15738
ENSMUSG00000003575	Crtc1	8.54805	8.35054	8.1249	8.37808	8.39153	8.06433	7.98193	7.81294	7.69646	7.74763	7.53013	7.68859	8.41299	8.1853	8.1757	8.16211	8.0711	8.23803	8.24561	8.16151	8.21237	8.34773	8.45994	8.50134	8.1794	8.44862	8.2807	8.28768	8.31637	8.15391	9.27203	9.50816	9.34252	9.35801	9.51251	9.43133	8.34116	8.27798	7.83044	7.65545	8.29915	8.1363	8.2065	8.43634	8.30291	8.25265	9.37423	9.43395
ENSMUSG00000003581	Rnf215	4.48503	4.32796	4.41226	4.43795	4.47901	4.3725	3.98569	4.05087	3.96573	3.99825	4.00295	4.09882	4.05171	3.98262	3.97163	4.106	4.07777	4.00782	4.11009	4.15679	4.25219	4.19805	4.20132	4.26376	4.25059	4.29111	4.29581	4.32938	4.32302	4.28708	5.04734	5.15392	5.0332	5.09152	5.02279	5.10744	4.40842	4.42982	4.00076	4.03334	4.01716	4.0518	4.17302	4.22104	4.27917	4.31316	5.07815	5.07391
ENSMUSG00000003585	Sec14l2	7.27019	7.34553	7.28724	7.24278	7.3436	7.19563	6.97931	7.10907	6.87105	6.98341	6.85599	6.86351	7.15729	7.27439	7.25998	7.09635	7.26183	7.34642	7.28133	7.16485	7.35824	7.343	7.33482	7.39566	7.53416	7.5911	7.46263	7.33276	7.53995	7.49307	8.69125	8.51887	8.50647	8.59409	8.62453	8.6909	7.30099	7.26067	6.98648	6.90097	7.21584	7.20605	7.26814	7.35783	7.5293	7.45526	8.5722	8.6365
ENSMUSG00000003604	Aven	3.07934	3.15358	3.02155	3.04897	3.10823	3.11254	2.46702	2.5419	2.53441	2.46524	2.44576	2.4873	3.04467	3.01704	2.964	3.00319	3.06099	2.97951	2.78489	2.75529	2.76526	2.80066	2.73109	2.83947	3.14555	3.16366	3.1501	3.12531	3.17036	3.15579	3.98619	4.05266	4.01312	4.04151	4.00951	3.97265	3.08483	3.08991	2.51444	2.4661	3.03085	3.00939	2.76848	2.79041	3.1531	3.15048	4.01732	4.00789
ENSMUSG00000003617	Cp	NA	NA	NA	NA	NA	NA	NA	NA	NA	NA	NA	NA	2.99718	3.00583	2.9764	3.24536	2.95099	2.97188	NA	NA	NA	NA	NA	NA	3.30048	3.30502	3.31404	3.51953	3.67045	3.25042	2.47672	2.47935	2.52087	2.50027	2.50344	2.51905	NA	NA	NA	NA	3.00151	3.05758	NA	NA	3.30652	3.48013	2.49232	2.50759
ENSMUSG00000003623	Crot	5.15851	5.18177	5.26578	5.24588	5.29048	5.25359	4.97093	5.14351	5.1077	5.01192	5.16407	5.07465	4.97708	5.02831	5.06005	4.94246	4.92539	5.08686	5.14235	5.24177	5.16328	5.14795	5.03743	5.18981	5.61294	5.66346	5.55681	5.59674	5.63174	5.60426	6.27643	6.24933	6.32887	6.31135	6.31944	6.24749	5.20202	5.26332	5.07405	5.08354	5.0027	4.97597	5.18247	5.12506	5.61107	5.61091	6.28488	6.29276
ENSMUSG00000003644	Rps6ka1	3.5079	3.51956	3.58748	3.47558	3.49861	3.53176	2.71215	2.78728	2.75872	2.76449	2.69546	2.77959	2.99815	2.96942	3.01967	3.01202	2.97305	2.99242	3.14898	3.18432	3.08089	3.12714	3.25409	3.19139	3.30611	3.32732	3.27859	3.4075	3.33309	3.29945	4.01497	4.09879	4.05241	4.09408	4.03487	4.03954	3.53831	3.50198	2.75272	2.74651	2.98378	3.00158	3.13807	3.19087	3.30401	3.34668	4.05539	4.05616
ENSMUSG00000003657	Calb2	4.57411	4.81412	4.67797	4.54602	4.70758	4.79915	4.43229	4.72911	4.51647	4.33439	4.30608	4.51736	4.71708	4.71298	4.71389	4.72459	5.05087	4.78132	5.71076	5.51618	6.02772	5.56481	5.93565	5.96951	5.49203	5.61413	5.89013	5.79748	6.29066	5.86431	6.99735	6.73429	7.5445	7.106	7.52371	7.06072	4.68873	4.68425	4.55929	4.38594	4.71503	4.82979	5.75155	5.82332	5.66543	5.98415	7.09205	7.23014
ENSMUSG00000003660	Snrnp200	9.81821	9.96906	9.8734	9.99406	9.89953	9.81767	9.5608	9.66431	9.55228	9.49859	9.70109	9.46895	9.76172	9.72004	9.68763	9.70963	9.69832	9.66983	9.53198	9.6693	9.51507	9.76081	9.60432	9.62236	10.1357	10.4263	10.2223	10.2753	10.0758	10.1939	11.0245	10.9215	11.0634	11.0984	11.0889	11.1361	9.88689	9.90376	9.59246	9.55621	9.74088	9.69853	9.57212	9.6625	10.2614	10.1817	11.0031	11.1078
ENSMUSG00000003662	Ciao1	6.57356	6.53405	6.50026	6.48155	6.45507	6.40072	6.31631	6.1753	6.13618	6.16952	6.03834	6.13945	6.35307	6.23198	6.37336	6.42641	6.37956	6.29426	6.46033	6.15695	6.33595	6.28763	6.41091	6.53245	6.50463	6.56019	6.58736	6.53217	6.56575	6.57688	7.62111	7.728	7.62731	7.77115	7.75241	7.70798	6.53596	6.44578	6.20927	6.11577	6.29252	6.39311	6.31774	6.41033	6.55073	6.55827	7.65881	7.74385
ENSMUSG00000003665	Has1	NA	NA	NA	NA	NA	NA	NA	NA	NA	NA	NA	NA	NA	NA	NA	NA	NA	NA	NA	NA	NA	NA	NA	NA	NA	NA	NA	NA	NA	NA	2.25059	2.22258	2.29263	2.26058	2.20244	2.23102	NA	NA	NA	NA	NA	NA	NA	NA	NA	NA	2.25527	2.23135
ENSMUSG00000003680	Taf6l	5.02404	5.00187	4.94297	4.91945	4.9576	4.91235	4.587	4.50687	4.53019	4.46878	4.43207	4.43102	4.67314	4.60198	4.64769	4.59849	4.6544	4.67812	4.6693	4.70179	4.59167	4.66899	4.70049	4.69616	4.95678	4.94701	4.98418	4.89763	5.1434	4.91588	5.92542	6.06918	6.01495	5.94687	6.00274	6.06825	4.98963	4.9298	4.54135	4.44396	4.63756	4.63353	4.65425	4.68855	4.96266	4.98564	6.00319	6.00596
ENSMUSG00000003721	Insig2	6.41525	6.44869	6.50786	6.53669	6.49958	6.60223	6.37357	6.32406	6.35758	6.36162	6.47871	6.32751	6.36507	6.33737	6.24965	6.28942	6.34543	6.32492	6.32055	6.23209	6.31749	6.13812	6.22286	6.06998	6.70953	6.68964	6.82322	6.68473	6.80299	6.7264	7.69317	7.74938	7.70266	7.57921	7.48387	7.62183	6.45727	6.54617	6.35173	6.38928	6.35122	6.29483	6.29004	6.14365	6.7408	6.73804	7.71507	7.56164
ENSMUSG00000003731	Kpna6	8.45503	8.4839	8.56291	8.49921	8.47127	8.39225	7.90661	7.98876	8.09037	8.16145	7.80023	8.01148	8.02883	8.17318	8.08612	8.08624	8.2014	8.08302	7.92009	8.04148	7.98436	8.11106	8.09501	7.96993	8.56986	8.69032	8.64396	8.65099	8.56609	8.68896	9.48678	9.50912	9.54176	9.44209	9.48187	9.42786	8.50061	8.45424	7.99525	7.99105	8.10101	8.12459	7.98198	8.05867	8.63471	8.63535	9.51256	9.45061
ENSMUSG00000003746	Man1a	10.0772	9.98793	10.2493	10.1742	10.0733	10.0687	9.55143	9.89222	9.79784	9.69047	10.0317	9.58214	9.61683	9.74417	9.59791	9.51603	9.3551	9.61463	9.4118	9.39319	9.45834	9.40954	9.34349	9.24626	9.9668	9.91636	10.05	9.97485	9.97414	9.82392	10.6929	10.8221	10.33	10.497	10.6297	10.5113	10.1048	10.1054	9.74716	9.7681	9.6805	9.48968	9.42111	9.3331	9.9777	9.9243	10.615	10.546
ENSMUSG00000003752	Itpkc	4.11872	4.04912	4.14288	4.11084	4.06082	4.05061	3.48723	3.49979	3.41582	3.35931	3.37372	3.44369	3.67289	3.70835	3.71558	3.77027	3.72234	3.72314	3.30837	3.36389	3.41961	3.44562	3.3171	3.43023	3.72161	3.74153	3.79649	3.85087	3.7222	3.79435	5.05314	5.09655	5.00453	5.10319	5.11121	5.12847	4.10357	4.07409	3.46761	3.39224	3.69062	3.73606	3.36396	3.39765	3.75321	3.78914	5.05141	5.11429
ENSMUSG00000003762	Coq8b	3.86924	3.82827	3.81884	3.83012	3.89774	3.85651	3.76569	3.65013	3.60624	3.70907	3.65767	3.65256	3.96599	3.91043	3.87561	3.90732	3.82521	3.88294	3.68961	3.72416	3.66459	3.76021	3.83906	3.80979	3.88295	3.89399	3.94843	3.85316	3.89822	3.89992	5.12558	5.28845	5.20517	5.22593	5.1807	5.19766	3.83879	3.86146	3.67402	3.6731	3.93821	3.86938	3.69279	3.80302	3.90846	3.88376	5.2064	5.20143
ENSMUSG00000003778	Brd8	7.65035	7.71236	7.73272	7.74737	7.69762	7.79861	7.3752	7.47522	7.43032	7.37004	7.11466	7.46548	7.43068	7.42456	7.37578	7.41773	7.51009	7.40974	7.46529	7.4683	7.34162	7.40752	7.40894	7.44677	7.99405	7.98776	7.90585	7.9802	7.90628	8.02934	8.75389	8.60177	8.66905	8.69561	8.71882	8.83531	7.69848	7.74787	7.42691	7.31673	7.42762	7.43454	7.42507	7.42107	7.96255	7.97194	8.6749	8.74992
ENSMUSG00000003808	Farsa	6.20194	6.04933	5.89554	6.0765	6.01685	5.97404	5.41596	5.74679	5.52817	5.45415	5.78449	5.54265	5.90569	5.85139	5.80691	5.84805	5.88853	5.80185	5.97798	5.78891	5.74778	5.84222	5.85664	5.90954	5.99114	6.09728	5.9479	6.01756	6.08899	5.94636	6.87337	6.93854	6.95546	6.98394	7.01821	6.97427	6.04894	6.02246	5.56364	5.59376	5.87854	5.84783	5.83822	5.86946	6.0121	6.01764	6.92246	6.99214
ENSMUSG00000003809	Gcdh	4.98366	5.01664	4.95534	5.05905	5.05557	4.96526	4.57726	4.60848	4.58671	4.57228	4.59323	4.57418	4.62452	4.62076	4.61704	4.6761	4.65907	4.69053	4.97867	4.90385	4.92717	4.88387	4.8213	4.95226	5.28303	5.35337	5.22088	5.22455	5.21847	5.23178	6.15922	6.05457	6.11532	6.1235	5.98637	6.0839	4.98521	5.02663	4.59082	4.5799	4.62264	4.65074	4.93656	4.88581	5.28576	5.22493	6.1097	6.06459
ENSMUSG00000003810	Mast2	6.83674	6.8876	6.93133	6.94684	6.90402	6.67687	6.42911	6.08007	6.24374	6.20286	6.059	5.95896	6.27154	6.49611	6.34761	6.32641	6.30616	6.40815	6.27815	6.4068	6.43811	6.34519	6.48517	6.64928	6.62295	6.77495	6.41409	6.53995	6.4556	6.50947	7.48524	7.4657	7.56422	7.65233	7.49986	7.65125	6.88523	6.84258	6.25097	6.07361	6.38383	6.32673	6.37435	6.49321	6.60399	6.50167	7.50505	7.60115
ENSMUSG00000003813	Rad23a	7.34195	7.17469	7.23761	7.16832	7.15819	7.11547	6.75234	6.88981	6.85084	6.70788	6.80405	7.00303	6.88015	6.91608	6.76996	6.76084	6.80836	6.92375	6.93178	6.82477	6.93519	6.8095	6.94154	6.95174	7.18347	7.21453	7.2146	7.19878	7.29171	7.15402	7.95831	8.10175	8.11334	7.95992	8.18184	8.02499	7.25142	7.14733	6.831	6.83832	6.89812	6.77972	6.89725	6.90092	7.2042	7.21484	8.0578	8.05558
ENSMUSG00000003814	Calr	11.3269	11.293	11.3626	11.3469	11.4245	11.3844	11.3612	11.4979	11.2837	11.6601	11.3458	11.284	11.2765	11.2757	10.9906	11.0735	10.9818	11.2399	11.3305	11.0679	11.1897	10.9682	11.0036	11.2254	11.9641	11.9229	11.827	11.87	11.8946	11.7226	12.8902	12.5363	12.5868	12.6341	12.3465	12.3488	11.3275	11.3852	11.3809	11.43	11.2761	11.0153	11.1961	11.0657	11.9047	11.8291	12.6711	12.4431
ENSMUSG00000003824	Syce2	2.07384	2.01304	2.00703	2.04038	2.06363	2.04049	2.00349	1.9838	1.96727	1.92762	1.93172	1.96337	2.28727	2.24704	2.25011	2.19871	2.21492	2.26584	2.08594	2.0668	2.07702	2.02909	2.06098	2.09007	2.27101	2.27471	2.32167	2.33002	2.28722	2.27569	3.46874	3.52036	3.56642	3.5438	3.54241	3.59008	2.03131	2.04817	1.98485	1.9409	2.26715	2.22125	2.07659	2.06005	2.28913	2.29764	3.51851	3.55876
ENSMUSG00000003847	Nfat5	8.63093	8.69239	8.84849	8.67141	8.6424	8.74605	8.58687	8.41352	8.4475	8.80358	8.71398	8.37017	8.15861	8.19455	8.25693	8.2527	8.23065	8.1672	8.01456	8.13669	8.04798	8.08781	8.04777	8.16507	8.95928	8.92361	9.00767	8.9665	8.97331	8.91643	9.73692	9.64385	9.60034	9.75555	9.56515	9.74581	8.72393	8.68662	8.48263	8.62924	8.17658	8.24676	8.06641	8.10021	8.96352	8.95208	9.66037	9.68884
ENSMUSG00000003848	Nob1	6.59817	6.49169	6.73245	6.58002	6.60065	6.46657	6.25971	6.31259	6.33601	6.47568	6.45143	6.30392	6.42996	6.3067	6.3163	6.39721	6.30838	6.28665	6.43539	6.32388	6.30703	6.36563	6.33796	6.18984	6.59137	6.70909	6.53505	6.62806	6.74948	6.5659	7.47354	7.62719	7.47857	7.55553	7.54195	7.56962	6.60744	6.54908	6.30277	6.41035	6.36833	6.34063	6.35543	6.29781	6.61184	6.64781	7.52643	7.5557
ENSMUSG00000003849	Nqo1	2.61663	2.55826	2.56114	2.54568	2.59941	2.57468	2.01146	2.05132	2.08695	2.08278	2.09432	2.08886	2.09681	2.16538	2.12211	2.09205	2.08974	2.10811	2.26027	2.25452	2.24394	2.28766	2.28346	2.25332	2.77193	2.80212	2.78389	2.77276	2.83634	2.82663	4.21234	4.12103	4.15604	4.21309	4.19303	4.18833	2.57868	2.57326	2.04991	2.08865	2.13109	2.1013	2.25291	2.27481	2.78598	2.81191	4.16314	4.19815
ENSMUSG00000003863	Ppfia3	8.77806	8.64652	8.45342	8.60799	8.56693	8.54576	8.22407	8.31685	8.17223	8.29842	8.15851	8.25553	8.51579	8.43908	8.19606	8.39381	8.36468	8.52141	8.47468	8.35385	8.44962	8.42967	8.47317	8.40684	8.59638	8.67315	8.51913	8.51508	8.64246	8.52046	9.73853	9.59297	9.65726	9.65625	9.73551	9.66927	8.626	8.57356	8.23772	8.23749	8.47744	8.31818	8.42605	8.43656	8.59622	8.55933	9.66292	9.68701
ENSMUSG00000003865	Gys1	4.25849	4.28007	4.27933	4.21919	4.2722	4.31911	4.12146	4.12173	4.04439	4.09112	4.09993	4.08201	4.13563	4.1258	4.16194	4.1905	4.15573	4.2501	3.81051	3.86523	3.83724	3.91491	3.88639	3.86998	4.38854	4.42134	4.42631	4.53884	4.50988	4.45784	5.1364	5.11566	5.12052	5.03332	5.09958	4.98931	4.27263	4.27017	4.09586	4.09102	4.13071	4.16939	3.83766	3.89042	4.41206	4.50218	5.1242	5.04073
ENSMUSG00000003868	Ruvbl2	6.26227	6.28234	6.10731	6.19782	6.26558	6.22068	5.85127	5.85809	5.92447	5.88201	5.91582	5.86985	6.03843	5.95539	6.09449	5.91622	6.07415	6.04831	6.04454	6.12592	6.17591	6.03667	6.15476	6.09712	6.33115	6.31225	6.25412	6.29177	6.33268	6.23582	7.39948	7.41447	7.25356	7.51407	7.52115	7.41384	6.2173	6.22803	5.87794	5.88923	5.99691	6.02828	6.11545	6.09619	6.29918	6.28676	7.35584	7.48302
ENSMUSG00000003872	Lin7b	7.68329	7.57742	7.44343	7.58129	7.57197	7.5488	7.0998	7.05241	7.03828	6.9062	6.90237	7.10782	7.35354	7.40523	7.27031	7.30565	7.27082	7.3382	7.07577	6.90355	7.11837	7.15887	7.16418	7.09568	7.335	7.24373	7.30301	7.41113	7.53333	7.27483	8.21652	8.55088	8.36311	8.10297	8.31471	8.24674	7.56805	7.56735	7.0635	6.97213	7.37939	7.28226	7.03256	7.13958	7.29391	7.40643	8.37684	8.22147
ENSMUSG00000003873	Bax	4.40872	4.35447	4.40904	4.40987	4.34732	4.27506	3.56804	3.55628	3.62234	3.65973	3.52783	3.63827	3.77287	3.74134	3.75665	3.80434	3.72447	3.78228	3.6193	3.5896	3.67251	3.56957	3.59114	3.60781	4.03506	4.09868	4.0879	4.1062	4.13536	4.10533	5.15943	5.18808	5.18307	5.1444	5.22374	5.22223	4.39074	4.34408	3.58222	3.60861	3.7571	3.76182	3.62714	3.5895	4.07388	4.11563	5.17686	5.19679
ENSMUSG00000003923	Tfam	7.47897	7.54378	7.64936	7.56237	7.62593	7.65168	7.37956	7.44435	7.5083	7.32452	7.32421	7.51758	6.91327	7.17705	7.16124	7.04507	7.11613	7.08208	6.93379	7.00411	7.02356	6.83586	6.86929	6.89029	7.72795	7.46946	7.6901	7.64834	7.51166	7.70304	8.47122	8.42266	8.34458	8.33546	8.27917	8.39507	7.55737	7.61333	7.44407	7.38877	7.04516	7.10748	6.98715	6.86515	7.62917	7.62101	8.41282	8.33657
ENSMUSG00000003929	Zfp81	6.23513	6.40188	6.39635	6.46782	6.35342	6.3764	6.04935	6.1583	6.23072	6.14949	6.10462	5.96762	5.98895	5.97604	6.14909	6.00205	6.04427	6.00939	5.76761	5.99725	5.80855	5.85635	5.94952	5.80221	6.58282	6.65218	6.57764	6.45256	6.37794	6.80594	7.3871	7.28284	7.33267	7.58262	7.40781	7.44821	6.34445	6.39921	6.14612	6.07391	5.98249	6.06514	5.8578	5.86936	6.60421	6.54548	7.3342	7.47954
ENSMUSG00000003934	Efnb3	6.78968	6.64885	6.60392	6.81855	6.65607	6.57744	6.26446	6.36465	6.27789	6.07861	6.15566	6.10774	6.35838	6.42747	6.40874	6.39763	6.32315	6.35306	6.20496	6.25852	6.39978	6.33011	6.4122	6.42803	6.69956	6.74287	6.82317	7.08847	6.91528	6.66734	7.32386	7.58168	7.3705	7.27503	7.51217	7.4419	6.68082	6.68402	6.30233	6.114	6.39292	6.37651	6.28775	6.39012	6.7552	6.89036	7.42535	7.4097
ENSMUSG00000003948	Mmd	6.58644	6.63722	6.50832	6.63598	6.57509	6.6643	6.57509	6.58002	6.73068	6.56733	6.42178	6.65106	6.32562	6.4004	6.36467	6.53957	6.4006	6.22243	6.45661	6.36432	6.39083	6.37666	6.52229	6.18561	6.87457	7.19396	7.10866	7.04068	7.14949	7.22151	8.07821	8.19195	8.20435	8.41581	8.43217	8.29002	6.57733	6.62513	6.6286	6.54672	6.36301	6.43495	6.40392	6.36152	7.05906	7.13723	8.15817	8.37933
ENSMUSG00000003949	Hlf	8.42549	8.44208	8.57982	8.3447	8.43051	8.60116	8.40517	8.1197	8.11779	8.30714	8.41751	8.59394	8.21925	7.89182	7.98736	8.2409	8.06524	7.969	8.37604	8.10982	8.09164	8.21574	8.01121	8.27429	8.86818	8.38524	8.45009	8.19153	8.41293	8.4615	9.41337	9.08352	9.50295	8.93079	8.59336	8.83099	8.48246	8.45879	8.21422	8.43953	8.05554	8.09783	8.1925	8.16708	8.56784	8.35532	9.33328	8.78504
ENSMUSG00000003955	Fam162a	7.4289	7.3093	7.38927	7.31494	7.38206	7.30224	6.99099	7.06969	6.87856	6.76997	7.35649	6.87881	7.05295	7.12631	7.14567	7.01982	6.95175	7.26923	7.24843	7.01215	7.2387	7.15851	7.04791	7.15409	7.48115	7.37157	7.24511	7.34924	7.39652	7.22483	8.44443	8.299	8.35911	8.25453	8.12722	8.29429	7.37582	7.33308	6.97975	7.00176	7.08963	7.03908	7.16643	7.12017	7.36594	7.32353	8.36751	8.22535
ENSMUSG00000003970	Rpl8	8.60638	8.48303	8.36345	8.58153	8.44094	8.34923	8.09281	8.09914	8.03259	8.08556	8.22127	8.09479	8.25948	8.17295	8.18391	8.22579	8.24159	8.07387	8.18351	8.19228	8.12988	8.27273	8.49175	8.42861	8.32695	8.42888	8.736	8.60817	8.4777	8.48989	9.14699	9.7018	9.29706	9.35625	9.50018	9.45234	8.48429	8.45723	8.07484	8.13387	8.21622	8.2171	8.16856	8.3977	8.49728	8.52525	9.38195	9.43626
ENSMUSG00000003974	Grm3	7.43233	7.47542	7.59806	7.5404	7.48807	7.90663	7.51813	7.20345	7.57943	7.21468	7.32507	7.98567	6.93061	6.75194	6.9869	7.14687	7.13833	6.95713	6.91794	7.03396	6.68457	6.7452	6.54496	6.91365	7.92068	7.37451	7.46243	7.32272	7.12451	7.65695	7.94312	7.3968	7.97954	7.67819	7.61744	7.48661	7.50194	7.64503	7.43367	7.50847	6.84128	7.0907	6.87882	6.7346	7.58587	7.36806	7.77315	7.59408
ENSMUSG00000003992	Ssbp2	7.61404	7.72856	7.75963	7.71455	7.75969	7.92169	7.69244	7.67975	7.7304	7.79418	7.52355	7.80582	7.30357	7.5403	7.45907	7.58926	7.49642	7.35708	7.35552	7.4231	7.29456	7.20732	7.39361	7.48056	8.23299	8.17387	8.32717	8.42714	8.2806	8.27643	8.95687	8.82173	8.93121	8.9823	8.86277	8.68979	7.70074	7.79864	7.70087	7.70785	7.42194	7.51492	7.35773	7.3605	8.24468	8.32806	8.90327	8.84496
ENSMUSG00000004018	Fancl	5.15298	5.10133	5.11028	5.0943	5.20869	5.17401	4.54561	4.65975	4.65791	4.45987	4.49464	4.55603	4.63594	4.79084	4.75869	4.73868	4.72157	4.68885	4.08771	4.19451	4.18552	4.15017	4.26503	4.25156	4.91209	4.97605	4.94191	4.9751	4.90388	4.9565	5.72582	5.68496	5.69192	5.64958	5.62901	5.63861	5.12153	5.159	4.62109	4.50351	4.71339	4.73965	4.15591	4.22226	4.94335	4.94516	5.7009	5.63906
ENSMUSG00000004031	Brinp2	7.29299	7.19715	7.16753	7.14832	7.26127	7.1186	6.88986	6.85416	6.70724	6.84024	6.95095	6.78876	6.67978	6.7671	6.66255	6.81951	6.80887	7.00372	6.85778	6.62512	6.77147	6.70968	6.77782	6.84708	6.99504	6.79387	6.90461	6.84495	6.99196	6.74557	8.01035	7.85561	7.95231	7.68691	7.90353	7.82089	7.21922	7.17606	6.81709	6.85998	6.72344	6.76364	6.75145	6.77819	6.89784	6.86082	7.93942	7.80378
ENSMUSG00000004032	Gstm5	8.4723	8.55423	8.67014	8.63891	8.5676	8.58619	8.34453	8.53918	8.46353	8.2994	8.28843	8.44859	8.47904	8.47309	8.40477	8.40033	8.395	8.55105	8.54564	8.32918	8.5854	8.4998	8.38442	8.07527	9.03708	8.99824	8.96526	9.01977	8.956	8.8923	9.932	9.92088	9.90171	9.92709	9.83324	9.92431	8.56556	8.59756	8.44908	8.34547	8.47606	8.40003	8.48674	8.31983	9.00019	8.95602	9.9182	9.89488
ENSMUSG00000004035	Gstm7	6.08356	6.11681	6.05311	6.13058	6.04779	6.01927	5.51431	5.71843	5.60385	5.5354	5.40641	5.51895	5.79281	5.89717	5.92921	5.85873	5.89373	5.81979	6.19771	6.09556	6.43071	6.17951	6.32004	6.07947	6.39427	6.43467	6.47338	6.3569	6.53696	6.35198	7.06992	7.42065	7.28495	7.17084	6.9618	7.01629	6.08449	6.06588	5.61219	5.48692	5.84499	5.89389	6.24133	6.19301	6.43411	6.41528	7.25851	7.04965
ENSMUSG00000004040	Stat3	6.61229	6.39219	6.5853	6.57675	6.35357	6.42694	6.40623	6.2249	6.18024	6.24135	6.37054	6.17461	6.36875	6.30901	6.29481	6.27063	6.37569	6.40439	6.33892	6.28453	6.53944	6.47047	6.30776	6.45337	6.86856	6.85449	6.81432	6.77381	6.90689	6.78817	8.041	8.00552	8.01307	8.30133	8.32895	8.51569	6.52993	6.45242	6.27045	6.26216	6.33888	6.31371	6.38763	6.41053	6.84579	6.82296	8.01987	8.38199
ENSMUSG00000004044	Cavin1	NA	NA	NA	NA	NA	NA	NA	NA	NA	NA	NA	NA	NA	NA	NA	NA	NA	NA	NA	NA	NA	NA	NA	NA	NA	NA	NA	NA	NA	NA	2.52327	2.52044	2.50819	2.61019	2.61019	2.58607	NA	NA	NA	NA	NA	NA	NA	NA	NA	NA	2.5173	2.60215
ENSMUSG00000004054	Map3k11	3.6819	3.66791	3.66305	3.76437	3.63148	3.68842	2.99844	2.89986	2.90414	2.9206	2.88032	2.87246	3.16018	3.18086	3.14349	3.19306	3.24584	3.14737	3.13366	3.08517	3.13456	3.2061	3.06651	3.16792	3.30028	3.34665	3.29524	3.32816	3.3581	3.28359	4.17148	4.31088	4.32304	4.25686	4.29752	4.30073	3.67095	3.69476	2.93415	2.89113	3.17052	3.19413	3.1178	3.14684	3.31406	3.32328	4.26847	4.28504
ENSMUSG00000004056	Akt2	4.09259	4.08859	4.06893	4.09609	4.06059	4.02795	3.64111	3.72411	3.71794	3.70259	3.67636	3.69798	3.61207	3.60062	3.61879	3.63304	3.51977	3.57005	3.86479	3.81203	3.84976	3.82723	3.90027	3.82596	4.06572	4.02913	4.06544	4.10054	4.03405	4.05572	4.93208	4.99387	4.98969	4.96389	4.94554	5.02234	4.08337	4.06154	3.69439	3.69231	3.60634	3.59053	3.84219	3.85115	4.05343	4.06344	4.97188	4.97726
ENSMUSG00000004069	Dnaja3	7.66118	7.76451	7.80429	7.74638	7.75698	7.73099	7.46462	7.55374	7.43323	7.45295	7.28487	7.35343	7.52538	7.56475	7.54617	7.49876	7.42582	7.53886	7.58259	7.5381	7.48425	7.5597	7.48106	7.54686	7.95241	7.91735	7.90933	7.85781	7.89317	7.83559	8.74389	8.71152	8.75497	8.76245	8.57284	8.70083	7.74332	7.74478	7.48386	7.36375	7.54506	7.49025	7.53498	7.52921	7.92636	7.86219	8.73679	8.67871
ENSMUSG00000004070	Hmox2	8.54672	8.59656	8.64499	8.66194	8.64397	8.77548	8.44566	8.43158	8.4109	8.49875	8.48151	8.35309	8.35156	8.46954	8.45646	8.38427	8.29725	8.39259	8.54589	8.28003	8.2265	8.3148	8.24519	8.27953	8.75535	8.89176	8.89826	8.90892	8.96844	8.91277	9.78089	9.68512	9.69676	9.80059	9.66906	9.70659	8.59609	8.6938	8.42938	8.44445	8.41055	8.37933	8.35081	8.27984	8.84846	8.93004	9.72093	9.72541
ENSMUSG00000004071	Cdip1	9.53601	9.52569	9.4955	9.61707	9.5248	9.51136	9.37667	9.375	9.30079	9.48412	9.42558	9.57501	9.05298	9.26438	9.24558	9.3686	9.25268	9.08941	9.15838	9.23676	9.15188	9.11721	9.25726	9.14042	9.51433	9.57072	9.87036	9.79065	9.72454	9.60822	10.4537	10.8993	10.6	10.6763	10.7314	10.7381	9.51907	9.55108	9.35082	9.49491	9.15868	9.28895	9.18234	9.17163	9.6518	9.7078	10.651	10.7152
ENSMUSG00000004085	Map3k20	3.91499	3.9466	3.87711	3.95427	3.93383	3.85116	3.53405	3.42498	3.46221	3.47517	3.41777	3.37231	3.81011	3.86271	3.81674	3.83084	3.80545	3.7871	3.54938	3.48964	3.61359	3.62364	3.5492	3.55262	3.89209	3.94393	3.88047	3.89762	3.88957	3.88265	5.03178	4.93043	4.91791	5.05482	4.91869	5.02734	3.9129	3.91309	3.47374	3.42175	3.83641	3.81768	3.55087	3.57515	3.9055	3.88995	4.96004	5.00028
ENSMUSG00000004096	Cwc15	8.13067	8.01781	7.98692	8.0925	8.09736	8.12008	7.82494	8.00993	7.91345	7.86413	7.98123	7.96726	7.77985	7.82397	7.80484	7.65833	7.64988	7.75094	7.62195	7.72947	7.61892	7.55907	7.59706	7.52431	8.23109	8.12174	8.13207	8.08857	8.18281	8.13062	9.12852	8.86574	8.95311	9.14156	8.91661	8.96576	8.04514	8.10331	7.91611	7.93754	7.80191	7.70435	7.65678	7.56015	8.16163	8.134	8.98245	9.00798
ENSMUSG00000004099	Dnmt1	7.57562	7.59862	7.57477	7.62299	7.56926	7.60066	7.3665	7.18424	7.14025	7.34216	6.99532	7.16485	7.30177	7.35358	7.31999	7.28183	7.35554	7.3389	7.2258	7.29044	7.13808	7.25677	7.26249	7.44588	7.92439	7.816	7.72507	7.70488	7.80409	7.7687	8.66688	8.49069	8.65338	8.5936	8.60567	8.50631	7.583	7.59764	7.23033	7.16744	7.32768	7.31912	7.21811	7.32172	7.82182	7.75923	8.60365	8.56853
ENSMUSG00000004100	Ppan	4.84267	4.8305	4.85369	4.92	4.7388	4.76214	4.27098	4.32969	4.27988	4.26098	4.21766	4.33966	4.48742	4.57592	4.59841	4.51457	4.5001	4.4775	4.68453	4.62923	4.67977	4.59302	4.74325	4.7171	4.73689	4.74685	4.80924	4.71704	4.81568	4.761	5.50397	5.59416	5.54554	5.64939	5.6319	5.6606	4.84229	4.80698	4.29352	4.27277	4.53167	4.53769	4.66451	4.68446	4.76433	4.76457	5.54789	5.6473
ENSMUSG00000004110	Cacna1e	11.3491	11.2462	11.1913	11.2556	11.292	11.1929	10.9207	10.9291	10.8996	10.8248	10.9785	10.964	10.81	10.8456	10.6769	10.8036	10.6616	10.7739	10.8717	10.6794	10.7843	10.8091	10.7659	10.8612	11.4066	11.426	11.5173	11.4304	11.3561	11.2418	12.2873	12.3097	12.052	12.0953	12.0193	12.1713	11.2622	11.2468	10.9165	10.9225	10.8278	10.714	10.7784	10.812	11.45	11.3428	12.2163	12.0953
ENSMUSG00000004113	Cacna1b	8.80318	8.73492	8.67881	8.68383	8.65832	8.75142	8.48962	8.41838	8.37268	8.27533	8.41302	8.39931	8.06522	8.24092	8.1458	8.23351	8.16768	8.23126	8.23979	8.18905	8.19545	8.13458	8.11003	8.23801	8.80385	8.83744	8.87633	8.79061	8.84399	8.6768	9.80531	9.65333	9.60511	9.55057	9.58189	9.69196	8.73897	8.69786	8.42689	8.36255	8.15307	8.18233	8.2081	8.16087	8.83921	8.77047	9.68791	9.60814
ENSMUSG00000004127	Trmt10a	3.28672	3.33533	3.25981	3.32065	3.36487	3.35574	3.32984	3.39922	3.43805	3.31323	3.41294	3.40169	3.31652	3.31888	3.31288	3.33963	3.33949	3.3333	2.93348	3.02714	3.01784	2.93248	2.92589	2.9628	3.86875	3.85129	3.91866	3.82237	3.89788	3.81868	4.32373	4.24276	4.21726	4.2531	4.20657	4.24956	3.29395	3.34709	3.38904	3.37596	3.3177	3.33067	2.99282	2.94039	3.87957	3.84631	4.26125	4.23641
ENSMUSG00000004151	Etv1	7.20647	7.29766	7.24984	7.49708	7.33055	7.33262	7.09226	7.24822	7.27617	7.11038	7.17778	7.07025	6.93887	6.99297	6.92693	6.8885	6.95578	6.65518	6.6113	6.82246	6.48449	6.71853	6.89656	6.7504	7.2147	7.4485	7.48805	7.63614	7.39625	7.47123	8.07489	8.14908	8.23966	7.87783	7.84439	7.71842	7.25132	7.38675	7.20555	7.11947	6.96592	6.92374	6.63942	6.7885	7.38375	7.50121	8.15454	7.81355
ENSMUSG00000004187	Kifc2	6.86879	6.82768	6.82768	6.9771	6.92921	6.82606	6.31996	6.51645	6.31337	6.41579	6.15221	6.56628	7.01083	6.79855	6.84012	6.9356	6.88746	6.7946	6.70097	6.90788	6.59936	6.92398	6.87599	6.82093	6.96432	6.87574	7.0203	6.84028	6.88236	6.87767	7.73604	7.83978	7.89898	7.54998	7.6337	7.59962	6.84138	6.91079	6.38326	6.37809	6.90469	6.88773	6.73607	6.87363	6.95345	6.86677	7.82494	7.59443
ENSMUSG00000004207	Psap	13.1626	13.0688	13.1041	13.1092	13.0593	13.1252	12.8258	12.8916	12.7551	12.7775	12.8789	13.1172	12.7054	12.7279	12.6772	12.7607	12.7004	12.7955	12.8787	12.6841	12.9117	12.7153	12.7386	12.8779	13.3016	13.0077	13.196	13.0896	13.1886	13.0688	13.9989	14.1214	14.0862	13.8325	13.8642	13.9417	13.1119	13.0979	12.8242	12.9245	12.7167	12.7128	12.8248	12.7773	13.1684	13.1157	14.0688	13.8795
ENSMUSG00000004221	Ikbkg	6.61286	6.48824	6.60361	6.38663	6.46009	6.63432	5.85444	6.03482	5.99475	6.06192	6.20451	6.0537	6.16001	6.14974	6.11591	6.02334	6.12562	6.17524	6.44903	6.3232	6.29016	6.25997	6.1978	6.27875	6.72425	6.65852	6.63163	6.66499	6.72636	6.54739	7.66548	7.57163	7.52886	7.52426	7.51859	7.526	6.56824	6.49368	5.96134	6.10671	6.15488	6.08829	6.35413	6.24551	6.67147	6.64624	7.58866	7.52295
ENSMUSG00000004233	Wars2	4.21858	4.08381	4.13456	4.10242	4.10872	4.12013	3.17766	3.16877	3.20899	3.20237	3.11114	3.23434	3.77202	3.65001	3.74716	3.72834	3.787	3.70731	3.51102	3.57715	3.48008	3.63461	3.57037	3.5434	4.07512	4.0907	4.16245	4.13644	4.08269	4.12988	4.91558	5.03528	4.96521	4.96058	4.90474	4.95034	4.14565	4.11042	3.18514	3.18262	3.71102	3.75417	3.52275	3.58279	4.10942	4.11634	4.97202	4.93856
ENSMUSG00000004264	Phb2	7.21966	7.02634	6.96192	6.99421	7.06624	6.82098	6.88678	6.72189	6.64303	6.74259	6.95435	6.68128	6.75675	6.68161	6.6559	6.74031	6.61814	6.66742	6.85547	6.71713	6.69224	6.70426	6.83924	6.89782	6.90581	6.74748	6.97772	7.03312	6.90292	6.89255	7.80779	7.92397	7.75723	7.8206	7.86094	7.85285	7.06931	6.96047	6.75056	6.79274	6.71918	6.67145	6.75495	6.81377	6.877	6.94286	7.82967	7.84479
ENSMUSG00000004267	Eno2	11.9306	11.8972	11.8315	11.9416	11.9196	11.7513	11.5002	11.5216	11.3722	11.4839	11.4851	11.4342	11.7858	11.6292	11.5299	11.6435	11.5885	11.7071	11.6934	11.5664	11.6348	11.7045	11.6471	11.6894	11.9215	12.0819	11.9231	11.8692	12.0418	11.8622	12.855	13.0198	12.9769	12.8798	12.8939	12.9059	11.8864	11.8708	11.4647	11.4677	11.7075	11.5873	11.6315	11.6804	11.9755	11.9244	12.9506	12.8932
ENSMUSG00000004268	Emg1	5.13988	5.14738	5.17956	5.20283	5.20336	5.08786	4.80644	4.84535	4.77237	4.8183	4.89798	4.78152	4.75801	4.74684	4.87656	4.74674	4.75864	4.81331	5.05734	4.83389	4.97175	4.88662	4.89911	4.97928	5.12813	5.13194	5.15141	5.07479	5.107	5.04353	6.14245	6.14405	6.12704	6.0531	5.96504	6.13407	5.15561	5.16468	4.80805	4.8326	4.75243	4.79398	4.95432	4.92167	5.13716	5.07511	6.13785	6.05074
ENSMUSG00000004270	Lpcat3	4.13978	4.21289	4.13343	4.19457	4.20222	4.17036	4.01433	4.02956	4.00491	3.98886	4.04543	4.11927	3.87933	3.98287	3.83683	3.84634	3.82124	3.80742	4.37621	4.37113	4.50491	4.3475	4.44342	4.39558	4.62062	4.52375	4.59986	4.57748	4.49449	4.54348	5.54498	5.53417	5.49537	5.52273	5.4	5.53121	4.16203	4.18905	4.01627	4.05119	3.9311	3.8348	4.41741	4.3955	4.58141	4.53848	5.52484	5.48464
ENSMUSG00000004285	Atp6v1f	8.31115	8.35335	8.31907	8.41384	8.36235	8.69939	8.26518	8.29729	8.52436	8.099	8.20019	8.45987	7.86125	7.95816	8.01508	7.89036	7.91265	7.79551	7.825	8.05539	7.62773	7.76714	7.90163	7.75855	8.60914	8.53583	9.02792	9.09422	8.82619	8.95963	9.35321	9.39945	9.2337	9.19625	9.48761	9.41044	8.32786	8.49186	8.36228	8.25302	7.90971	7.93936	7.83604	7.80911	8.7243	8.96001	9.32879	9.36477
ENSMUSG00000004317	Clcn5	3.78776	3.79983	3.7709	3.81815	3.83854	3.77524	3.94863	3.81622	3.85084	4.09987	4.01881	3.91776	2.65168	2.65159	2.68704	2.66752	2.6787	2.66137	3.71736	3.65867	3.62941	3.72417	3.66199	3.71895	3.87961	3.82436	3.87208	3.79542	3.78022	3.84896	4.47587	4.5078	4.58812	4.49503	4.48763	4.4978	3.78616	3.81064	3.8719	4.01215	2.65164	2.67775	3.66848	3.7017	3.85868	3.8082	4.52393	4.49349
ENSMUSG00000004319	Clcn3	9.27004	9.25834	9.41963	9.22349	9.22053	9.38507	9.04556	8.97755	9.1559	9.00409	8.91575	9.21537	8.92201	8.85992	8.81677	8.72968	8.73609	8.91198	8.72762	8.622	8.67888	8.64771	8.6241	8.56119	9.41054	9.21009	9.34407	9.25919	9.23928	9.32316	10.2239	10.104	10.1187	10.0347	9.97657	10.1535	9.316	9.27636	9.05967	9.04507	8.89096	8.76085	8.67617	8.611	9.32156	9.27388	10.1489	10.0549
ENSMUSG00000004347	Pde1c	2.50175	2.53552	2.54019	2.49274	2.48604	2.56947	2.33485	2.32502	2.27738	2.3116	2.26529	2.31969	1.98006	2.00356	2.0108	2.00863	2.02152	2.02619	1.90798	1.96965	2.01765	1.95869	1.91045	1.91812	2.6938	2.7586	2.68816	2.70674	2.6536	2.69257	2.99579	2.94403	3.01012	2.99445	2.92833	2.93931	2.52582	2.51608	2.31242	2.29886	1.99181	2.01365	1.96509	1.92909	2.71352	2.6843	2.98332	2.95403
ENSMUSG00000004356	Utp20	7.28489	7.37021	7.44315	7.21936	7.28728	7.23604	7.05347	6.86748	6.87668	6.9349	7.08084	6.75552	6.81783	6.91185	6.89099	6.81691	6.88916	6.72599	6.26747	6.59224	6.43341	6.61446	6.66477	6.56379	7.50373	7.68133	7.55884	7.6683	7.5171	7.6046	8.24226	8.21714	8.20816	8.333	8.28374	8.37695	7.36608	7.24756	6.93254	6.92375	6.86484	6.86569	6.43104	6.61434	7.5813	7.59666	8.22252	8.33123
ENSMUSG00000004360	9330159F19Rik	NA	NA	NA	NA	NA	NA	NA	NA	NA	NA	NA	NA	NA	NA	NA	NA	NA	NA	NA	NA	NA	NA	NA	NA	1.37808	1.44151	1.44089	1.40413	1.40559	1.39605	2.0992	2.05246	2.05958	2.06696	2.10143	2.07888	NA	NA	NA	NA	NA	NA	NA	NA	1.42016	1.40192	2.07041	2.08242
ENSMUSG00000004364	Cul3	10.0983	10.2679	10.3831	10.2976	10.3288	10.4189	10.0651	10.1599	10.2788	10.1732	10.2891	10.041	9.93216	10.0233	10.062	9.89461	10.0194	9.96518	9.76471	9.87359	9.87041	9.84378	9.85256	9.64508	10.5398	10.5466	10.4972	10.5141	10.5208	10.599	11.4128	11.0636	11.1876	11.2354	11.1477	11.1835	10.2498	10.3484	10.1679	10.1678	9.97771	9.99201	9.83623	9.78047	10.5279	10.5446	11.2213	11.1889
ENSMUSG00000004366	Sst	2.71823	2.71542	2.73279	2.74942	2.74367	2.66285	3.2438	3.22794	3.1168	3.13217	3.2329	3.1944	3.52452	3.48312	3.53231	3.46895	3.71976	3.45476	3.81346	3.73693	4.11618	3.76565	3.79912	3.88058	3.84011	3.74161	3.80422	3.74654	4.00993	3.73926	4.59803	4.69345	4.73645	4.65226	4.84186	4.722	2.72215	2.71864	3.19618	3.18649	3.50382	3.57368	3.88886	3.81512	3.79531	3.83191	4.67598	4.73871
ENSMUSG00000004383	Large1	9.16366	8.99935	9.16481	9.06517	9.05736	8.99513	8.67471	8.69346	8.63097	8.76975	8.78236	8.69678	8.66937	8.71986	8.60128	8.79225	8.6017	8.66799	8.63874	8.54501	8.72637	8.57771	8.46201	8.53897	8.9779	9.02821	9.01457	9.1431	9.08019	8.91769	9.982	10.053	9.85519	9.88871	10.1002	9.89936	9.10927	9.03922	8.66638	8.74963	8.69462	8.66508	8.6367	8.52623	9.00689	9.04699	9.96338	9.96275
ENSMUSG00000004393	Ddx56	6.75074	6.91093	6.75682	6.7641	6.75808	6.83929	6.6688	6.44816	6.40271	6.58427	6.77751	6.52138	6.43517	6.47208	6.34701	6.34212	6.44828	6.44507	6.29626	6.38085	6.45399	6.46495	6.46539	6.44589	6.55862	6.65412	6.605	6.74258	6.75519	6.66309	7.54531	7.67533	7.55311	7.64916	7.56681	7.70632	6.80616	6.78716	6.50656	6.62772	6.45362	6.37914	6.37703	6.45874	6.60591	6.72029	7.59125	7.64076
ENSMUSG00000004394	Tmed4	7.29634	7.14248	7.22812	7.26384	7.18962	7.20419	6.89026	6.97114	6.73346	6.86675	6.63103	6.79946	6.86417	6.80362	6.71131	6.80501	6.86072	6.71772	6.93673	6.84571	6.65383	6.84638	6.71408	6.89702	7.15887	7.12711	7.04651	7.09882	7.09441	6.97116	7.8073	8.06907	7.92507	7.91908	7.93805	7.97371	7.22231	7.21922	6.86495	6.76575	6.8339	6.79235	6.81209	6.81916	7.11083	7.0548	7.93381	7.94362
ENSMUSG00000004446	Bid	4.74467	4.86655	4.71619	4.71374	4.81924	4.90855	4.68185	4.60418	4.63421	4.65779	4.45123	4.6158	4.60081	4.61129	4.63408	4.72768	4.65625	4.59026	4.49997	4.56819	4.65539	4.53843	4.55399	4.47965	5.42198	5.43508	5.50629	5.54768	5.52655	5.5223	6.48249	6.47452	6.38546	6.55184	6.56368	6.47792	4.7758	4.81385	4.64008	4.57494	4.60605	4.67267	4.57451	4.52402	5.45445	5.53218	6.44749	6.53115
ENSMUSG00000004451	Ralb	5.25191	5.11726	5.23532	5.09522	5.21421	5.17064	4.34628	4.33928	4.29493	4.46243	4.33714	4.35854	4.56817	4.48759	4.51439	4.54857	4.49734	4.62198	4.29804	4.24787	4.28308	4.29268	4.26799	4.24205	4.47632	4.46974	4.51506	4.49949	4.4664	4.40269	5.32489	5.38554	5.24098	5.20567	5.29336	5.27372	5.2015	5.16002	4.32683	4.38604	4.52788	4.5201	4.27633	4.26757	4.48704	4.4562	5.31714	5.25758
ENSMUSG00000004455	Ppp1cc	1.90614	1.9442	1.8883	1.95034	1.9164	1.90372	NA	NA	NA	NA	NA	NA	NA	NA	NA	NA	NA	NA	NA	NA	NA	NA	NA	NA	1.93766	2.01607	1.98924	1.9831	1.97751	2.00693	2.29902	2.31924	2.35367	2.29999	2.2972	2.33233	1.91288	1.92349	NA	NA	NA	NA	NA	NA	1.98099	1.98918	2.32398	2.30984
ENSMUSG00000004460	Dnajb11	7.94665	8.01935	8.09876	8.00283	8.09995	8.19615	8.2336	8.20344	8.13834	8.44335	8.27616	8.05264	7.79088	7.96857	7.74469	7.74334	7.76152	7.85363	7.60712	7.65436	7.72432	7.48437	7.57363	7.62058	8.41284	8.16995	8.26902	8.27957	8.27579	8.21397	9.32794	8.94004	8.99715	9.04725	9.01786	8.97145	8.02159	8.09964	8.1918	8.25739	7.87972	7.74985	7.66193	7.55953	8.28393	8.25644	9.08838	9.01218
ENSMUSG00000004462	Tbccd1	3.82014	3.8066	3.82907	3.79874	3.77513	3.74477	3.76922	3.71041	3.73731	3.82587	3.91746	3.67043	2.99748	3.02843	3.01279	3.0786	3.0403	3.08156	3.33078	3.30476	3.34338	3.30151	3.32959	3.35424	3.5509	3.62072	3.57381	3.56733	3.50916	3.61632	4.69263	4.68311	4.7474	4.76856	4.73811	4.69077	3.8186	3.77288	3.73898	3.80459	3.01295	3.0439	3.32631	3.32845	3.58181	3.56427	4.70771	4.73248
ENSMUSG00000004473	Clec11a	2.69364	2.72975	2.69194	2.68738	2.6588	2.7065	2.54863	2.51387	2.50978	2.67288	2.49436	2.52953	2.73764	2.76698	2.8115	2.76054	2.74721	2.70686	2.44438	2.42236	2.42232	2.46641	2.42032	2.45961	NA	NA	NA	NA	NA	NA	3.25349	3.3099	3.20822	3.24984	3.19902	3.21624	2.70511	2.68422	2.52409	2.56559	2.75231	2.77308	2.42968	2.44878	NA	NA	3.2572	3.2217
ENSMUSG00000004500	Zfp324	4.09212	4.04222	4.02738	4.09296	4.06949	4.03448	3.75508	3.6661	3.7084	3.71791	3.94034	3.64074	3.78089	3.807	3.7742	3.77295	3.76329	3.73517	3.79058	3.72059	3.76799	3.80656	3.75095	3.75443	3.8285	3.85866	3.88215	3.83396	3.78949	3.87219	4.93097	4.83244	4.881	4.84004	5.05759	4.89178	4.05391	4.06564	3.70986	3.76633	3.79395	3.77015	3.75972	3.77065	3.85644	3.83188	4.88147	4.9298
ENSMUSG00000004508	Gab2	4.34016	4.39314	4.2254	4.3098	4.38137	4.31026	4.0238	3.98159	4.06335	3.99847	4.10959	4.09326	4.28038	4.25632	4.36595	4.29104	4.33017	4.44566	4.14934	4.12763	4.10894	4.19905	4.20054	4.19766	4.43787	4.46842	4.48171	4.44788	4.47056	4.35566	5.31433	5.3504	5.29852	5.26869	5.39326	5.28295	4.31956	4.33381	4.02292	4.06711	4.26835	4.32905	4.12864	4.19908	4.46267	4.4247	5.32108	5.31497
ENSMUSG00000004530	Coro1c	7.7891	7.73275	7.77707	7.828	7.79849	7.69694	7.41494	7.41867	7.19772	7.51695	7.4042	7.36373	7.40111	7.48056	7.41572	7.36401	7.37727	7.45256	7.55588	7.39624	7.40298	7.50391	7.47925	7.54597	7.678	7.77921	7.73124	7.7211	7.70367	7.61163	8.65996	8.67682	8.65438	8.86577	8.89318	8.98397	7.76631	7.77448	7.34378	7.42829	7.44084	7.38567	7.4517	7.50971	7.72948	7.6788	8.66372	8.91431
ENSMUSG00000004535	Tax1bp1	9.88214	10.0687	10.1045	10.0937	10.0544	10.2578	9.9145	9.98946	10.0915	10.0232	9.9811	9.95081	9.77542	9.83675	9.89545	9.79019	9.8368	9.83893	9.61806	9.77427	9.6853	9.601	9.57538	9.52807	10.3653	10.3916	10.3205	10.342	10.3867	10.4732	11.2966	11.0037	11.095	11.1699	11.1775	11.1351	10.0184	10.1353	9.99849	9.98502	9.80609	9.84082	9.69254	9.56815	10.3591	10.4006	11.1318	11.1608
ENSMUSG00000004558	Ndrg2	5.33944	5.33354	5.25453	5.48043	5.3822	5.37289	5.30843	5.50603	5.50493	6.18585	5.7977	5.53507	4.95248	4.98085	5.02045	4.96172	5.00144	4.93281	5.11928	4.94447	5.06652	5.018	5.08649	5.17351	6.07536	5.96026	5.86188	6.09907	6.02599	5.92372	6.80485	6.79963	7.33725	6.85155	7.13973	7.2788	5.30917	5.41184	5.4398	5.83954	4.96666	4.99454	5.04343	5.09267	5.96583	6.01626	6.98058	7.09002
ENSMUSG00000004561	Mettl17	3.83918	3.85315	3.86553	3.86332	3.93912	3.8462	3.22736	3.18205	3.2305	3.1599	3.1474	3.20111	3.3696	3.46464	3.48096	3.40852	3.44867	3.49654	3.50268	3.5643	3.51628	3.53616	3.57632	3.66006	4.19638	4.19204	4.20966	4.17267	4.20817	4.21243	4.86911	4.96145	4.82043	4.78204	4.78677	4.84826	3.85262	3.88288	3.21331	3.16947	3.41712	3.44605	3.52775	3.59085	4.19936	4.19775	4.88367	4.80569
ENSMUSG00000004562	Arhgef40	NA	NA	NA	NA	NA	NA	2.08163	2.05364	2.04712	2.08587	2.09756	2.06765	NA	NA	NA	NA	NA	NA	NA	NA	NA	NA	NA	NA	NA	NA	NA	NA	NA	NA	2.39771	2.40586	2.40073	2.40248	2.4135	2.41906	NA	NA	2.0608	2.08369	NA	NA	NA	NA	NA	NA	2.40143	2.41168
ENSMUSG00000004565	Pnpla6	6.5734	6.52796	6.44163	6.58095	6.50746	6.49176	5.95451	6.0958	6.00173	6.1262	5.81131	6.06177	6.20014	6.12328	6.19224	6.14859	6.26585	6.13946	6.51459	6.29834	6.41213	6.33399	6.32167	6.36947	6.58704	6.52096	6.62872	6.6418	6.62961	6.44067	7.44337	7.49236	7.40926	7.26467	7.1778	7.25372	6.51433	6.52672	6.01735	5.99976	6.16171	6.20223	6.40835	6.34171	6.57891	6.57069	7.44833	7.23206
ENSMUSG00000004567	Mcoln1	7.58411	7.46463	7.52081	7.48002	7.58131	7.55836	7.30446	7.30372	7.17406	7.24004	7.41195	7.26598	7.07844	7.09968	7.03866	7.10191	7.04863	7.12536	7.25741	7.14294	7.21625	7.15236	7.27322	7.10805	7.68081	7.60516	7.68094	7.69785	7.60808	7.57831	8.38056	8.50232	8.4957	8.39779	8.36208	8.55002	7.52318	7.5399	7.26075	7.30599	7.08906	7.06307	7.20553	7.17788	7.65564	7.62808	8.45953	8.43663
ENSMUSG00000004568	Arhgef18	7.45738	7.36899	7.50297	7.36231	7.41914	7.27338	7.10068	6.77962	6.82484	6.96108	6.93077	6.83823	6.89253	6.94046	6.97512	6.95236	7.0661	6.81722	6.91089	7.08398	6.77468	7.13848	6.92997	7.07477	7.43623	7.46256	7.27682	7.40729	7.26683	7.40833	8.2891	8.24369	8.34971	8.23111	8.232	8.20435	7.44311	7.35161	6.90171	6.91003	6.9165	6.99786	6.92318	7.04774	7.39187	7.36082	8.29417	8.22249
ENSMUSG00000004591	Pkn2	5.46011	5.5028	5.50252	5.47751	5.43691	5.5621	5.68831	5.63169	5.59402	5.54739	5.89603	5.51739	5.29916	5.222	5.20982	5.25369	5.24388	5.25491	5.13189	5.19309	5.11964	5.10913	5.06905	5.13582	5.81472	5.80524	5.79577	5.73106	5.77039	5.85746	6.60415	6.60212	6.58978	6.67047	6.54654	6.74906	5.48848	5.49217	5.63801	5.6536	5.26058	5.2358	5.14821	5.10466	5.80524	5.7863	6.59868	6.65536
ENSMUSG00000004610	Etfb	3.71255	3.54597	3.48374	3.51218	3.57011	3.531	3.05695	3.11518	2.99876	3.00232	3.1019	3.0471	3.48216	3.42858	3.54904	3.39817	3.41748	3.45222	3.64856	3.6467	3.58909	3.64179	3.63595	3.67886	3.11668	3.10776	3.24028	3.15186	3.14604	3.12727	4.46329	4.56428	4.41537	4.39881	4.48726	4.49931	3.58075	3.53776	3.05696	3.05044	3.45537	3.4549	3.62811	3.6522	3.15491	3.14172	4.48098	4.46179
ENSMUSG00000004626	Stxbp2	3.6813	3.64457	3.62355	3.68196	3.63732	3.67369	3.48582	3.43034	3.53004	3.46792	3.68638	3.54344	3.0377	3.02391	3.01825	3.02568	3.07492	3.03137	3.36606	3.32131	3.33099	3.33044	3.32086	3.33902	3.60163	3.59837	3.59001	3.65219	3.61003	3.56081	4.27372	4.30184	4.23842	4.29672	4.27025	4.31454	3.64981	3.66433	3.48206	3.56592	3.0308	3.03962	3.33945	3.33011	3.59667	3.60768	4.27133	4.29384
ENSMUSG00000004631	Sgce	7.15519	7.11577	7.15996	7.22332	7.19719	7.18513	7.20605	7.17186	7.14712	7.07405	7.4486	7.23977	6.58766	6.79362	6.77924	6.72248	6.86409	6.61792	6.33047	6.55425	6.71631	6.67239	6.49242	6.57655	7.24226	7.39501	7.45054	7.3888	7.33329	7.39198	8.17157	8.25475	7.97952	8.11805	8.16448	8.04324	7.14364	7.20188	7.17501	7.25414	6.69064	6.7886	6.53367	6.58045	7.3626	7.37136	8.13528	8.10859
ENSMUSG00000004633	Chn2	4.15858	4.08701	4.25548	4.08806	4.02462	4.18427	3.5931	3.61008	3.6205	3.59431	3.6989	3.83	3.56324	3.54419	3.6181	3.54934	3.60306	3.55107	3.68706	3.51514	3.66824	3.50906	3.56071	3.6157	4.04959	3.87755	3.82201	3.7629	3.84175	3.91493	4.1743	4.10087	4.33424	4.32494	4.25794	4.19795	4.16702	4.09898	3.60789	3.70774	3.55372	3.59017	3.62348	3.56183	3.91638	3.83986	4.20314	4.26028
ENSMUSG00000004637	Wwox	5.06495	5.03828	4.95057	5.05953	4.97452	5.10875	4.62344	4.64877	4.61527	4.54886	4.51029	4.71699	5.01054	4.93336	4.90299	4.88437	4.87399	4.93869	5.17516	5.01958	5.01938	5.08071	5.03416	5.08	5.61328	5.50843	5.51161	5.6335	5.64726	5.52537	5.87684	5.93577	6.02798	5.89783	5.74253	5.96491	5.01793	5.0476	4.62916	4.59205	4.97195	4.88712	5.07137	5.06495	5.54444	5.60204	5.94687	5.86842
ENSMUSG00000004642	Slbp	6.36493	6.38731	6.53285	6.46153	6.54224	6.60817	6.04055	6.04137	6.12299	6.05346	6.05325	6.26376	6.1261	5.89326	6.00495	6.02217	6.03747	6.07001	6.30376	6.08715	6.08084	6.16111	5.86692	6.155	6.48098	6.35637	6.45007	6.4856	6.4817	6.51534	7.34282	7.22241	7.39245	7.30922	7.29108	7.26549	6.42836	6.53731	6.0683	6.12349	6.00968	6.02153	6.15725	6.06101	6.42914	6.49421	7.31923	7.2886
ENSMUSG00000004665	Cnn2	4.36768	4.28681	4.29873	4.3433	4.27136	4.28631	3.82466	3.84326	3.75628	3.89681	3.71982	3.77189	3.6911	3.74788	3.69083	3.70773	3.65173	3.66176	3.19349	3.15456	3.1646	3.13898	3.22404	3.11273	3.39122	3.29257	3.30604	3.35344	3.3581	3.27885	4.78284	4.9005	4.77895	4.88303	4.80228	4.93788	4.31774	4.30032	3.80807	3.79618	3.71949	3.68343	3.17088	3.15858	3.32994	3.33013	4.82076	4.8744
ENSMUSG00000004667	Polr2e	7.83174	7.81774	7.78087	7.76502	7.78131	7.81976	7.57152	7.55654	7.37284	7.50839	7.32431	7.47686	7.67072	7.68114	7.42121	7.55374	7.40763	7.49835	7.87389	7.57784	7.69453	7.68144	7.66313	7.57574	7.76475	7.68134	7.8387	7.78163	7.89015	7.68519	8.6823	8.80523	8.84669	8.58928	8.69073	8.65866	7.81011	7.7887	7.5003	7.43652	7.67593	7.46086	7.71542	7.6401	7.7616	7.78566	8.77807	8.64622
ENSMUSG00000004677	Myo9b	3.19107	3.19434	3.16282	3.28665	3.21615	3.26145	2.73335	2.74129	2.70227	2.66188	2.64314	2.68659	2.96467	2.96781	2.93593	2.95405	2.96451	2.96902	2.7916	2.8359	2.81625	2.7653	2.8168	2.78592	3.6259	3.72789	3.66708	3.70564	3.66604	3.65569	4.40594	4.41584	4.47146	4.48039	4.47142	4.47475	3.18274	3.25475	2.72564	2.66387	2.96624	2.9515	2.81458	2.78934	3.67362	3.67579	4.43108	4.47552
ENSMUSG00000004698	Hdac9	7.63384	7.73623	7.69533	7.69243	7.74622	7.9046	7.47722	7.52125	7.60309	7.49534	7.61829	7.6905	7.40669	7.26191	7.29737	7.46915	7.32239	7.13946	7.31927	7.33453	7.27738	6.98542	7.17952	7.33372	7.84183	7.64467	7.77415	7.69099	7.68954	7.75806	8.18305	8.06386	8.05215	7.86458	7.85927	7.71296	7.68846	7.78108	7.53385	7.60138	7.3343	7.36297	7.31039	7.16622	7.75355	7.71287	8.09969	7.81227
ENSMUSG00000004730	Adgre1	NA	NA	NA	NA	NA	NA	NA	NA	NA	NA	NA	NA	NA	NA	NA	NA	NA	NA	NA	NA	NA	NA	NA	NA	NA	NA	NA	NA	NA	NA	2.16833	2.24077	2.17456	2.17359	2.18636	2.22295	NA	NA	NA	NA	NA	NA	NA	NA	NA	NA	2.19455	2.1943
ENSMUSG00000004748	Mtfp1	7.33671	7.4482	7.35866	7.2265	7.3111	7.28016	7.09153	7.02489	6.72975	6.90188	7.24081	6.8	7.17448	7.0837	6.96531	7.04537	6.84324	7.09865	7.02037	7.04073	6.97701	6.92504	7.07038	7.19222	7.2802	7.37017	7.54409	7.51325	7.485	7.32106	8.38506	8.38149	8.35301	8.19407	8.22376	8.23316	7.38119	7.27259	6.94872	6.9809	7.12909	6.95131	7.0127	7.06255	7.39815	7.43977	8.37318	8.217
ENSMUSG00000004768	Rab23	6.03747	6.05997	6.2379	6.04314	6.08549	6.20982	6.04761	5.99816	6.04254	6.17093	6.24692	6.05125	5.88201	5.72957	5.94368	5.92374	5.86597	5.74335	5.62903	5.68453	5.80236	5.66343	5.61937	5.65956	6.43752	6.36112	6.38574	6.23054	6.42946	6.40221	7.33474	7.0601	7.22671	7.3595	7.16208	7.23633	6.11178	6.11282	6.02944	6.15637	5.80579	5.91113	5.70531	5.64745	6.39479	6.35407	7.20718	7.25264
ENSMUSG00000004771	Rab11a	9.35222	9.5869	9.5735	9.63069	9.54762	9.82295	9.55679	9.52267	9.7911	9.59645	9.76489	9.72438	9.08645	9.2159	9.36105	9.28512	9.42006	9.1384	8.93635	9.39395	9.04907	9.11504	9.22638	8.92428	9.78171	10.0389	10.1118	10.1838	9.91865	10.2368	10.718	10.6624	10.7395	10.822	10.8185	10.7037	9.50421	9.66708	9.62352	9.69524	9.15117	9.35541	9.12645	9.08857	9.97746	10.1131	10.7066	10.7814
ENSMUSG00000004788	Eif2b2	6.51084	6.48717	6.4245	6.57016	6.5036	6.48136	6.087	6.08526	6.03068	5.94924	6.00171	6.00257	6.22616	6.19528	6.16546	6.15093	6.11793	6.09398	6.18899	6.15473	6.27372	6.37442	6.10694	6.28888	6.45207	6.48825	6.48162	6.43202	6.41726	6.35133	7.28341	7.44892	7.38154	7.26902	7.29219	7.29771	6.47417	6.51838	6.06764	5.98451	6.21072	6.14477	6.20581	6.25675	6.47398	6.40021	7.37129	7.28631
ENSMUSG00000004789	Dlst	8.44656	8.47174	8.49201	8.47015	8.47049	8.40059	8.11032	8.08933	8.24763	7.8831	8.01757	8.19119	7.86099	7.94915	7.94967	7.96033	8.0412	7.87755	7.79035	7.95013	7.95477	7.91598	7.83552	7.91767	8.54742	8.53798	8.49804	8.40324	8.51011	8.4889	9.35135	9.37724	9.34462	9.28927	9.3074	9.2586	8.4701	8.44708	8.14909	8.03062	7.90507	7.98374	7.89842	7.88972	8.52781	8.46742	9.35774	9.28509
ENSMUSG00000004791	Pgf	2.89535	2.85661	2.90249	2.85309	2.90141	2.87253	2.74495	2.72321	2.74274	2.66207	2.69794	2.75984	2.73091	2.70663	2.68867	2.7475	2.74978	2.77207	2.36996	2.30024	2.34334	2.34308	2.37938	2.33946	2.49975	2.54184	2.55998	2.55494	2.55936	2.53341	3.75604	3.80286	3.79658	3.76482	3.8242	3.77476	2.88482	2.87568	2.73697	2.70661	2.71877	2.72865	2.33785	2.35397	2.53386	2.54924	3.78516	3.78793
ENSMUSG00000004798	Ulk2	7.53625	7.41609	7.38669	7.44238	7.54944	7.42396	6.99222	6.99387	7.05489	7.05321	7.19196	6.82667	6.87741	7.01623	7.01989	7.09884	6.98757	6.99816	6.55485	6.83358	6.63951	6.71068	6.7904	6.78627	7.30591	7.28459	7.16205	7.17097	7.09826	7.31687	8.23839	8.23526	8.11973	8.21564	8.17946	8.26815	7.44634	7.47193	7.01366	7.02395	6.94682	7.03543	6.67598	6.76245	7.25085	7.19536	8.19779	8.22108
ENSMUSG00000004815	Dgkq	5.73068	5.62036	5.59722	5.70198	5.64723	5.53396	4.94682	5.06663	4.97191	4.85045	4.97247	4.98436	5.48469	5.43599	5.42763	5.49139	5.36827	5.43658	5.14734	5.24934	5.27846	5.30983	5.29727	5.31193	5.56256	5.45408	5.55265	5.57666	5.57263	5.54196	6.39242	6.38295	6.6913	6.41979	6.50368	6.39363	5.64942	5.62772	4.99512	4.93576	5.46034	5.42909	5.22505	5.30634	5.52309	5.56375	6.48889	6.43903
ENSMUSG00000004843	Chmp2b	8.0886	8.08938	8.03399	8.02662	8.02932	8.2067	7.75724	7.9637	7.91368	7.69801	7.93076	7.93697	7.54076	7.68479	7.61306	7.62013	7.5856	7.87822	7.70615	7.64185	7.63213	7.57588	7.56368	7.50215	8.17545	8.00934	8.15983	8.18911	8.2201	8.15258	9.05709	8.8848	8.88963	8.98738	8.85551	8.97168	8.07066	8.08755	7.87821	7.85525	7.61278	7.60626	7.66005	7.54724	8.11487	8.18726	8.94384	8.93819
ENSMUSG00000004846	Plod3	6.04285	6.09459	6.01271	6.07607	6.03172	6.04917	5.93673	5.73847	5.66376	5.85539	5.93369	5.65834	5.46186	5.5155	5.59912	5.58285	5.52168	5.59444	5.64193	5.50118	5.6426	5.47845	5.56206	5.50652	5.94779	5.71424	5.96937	5.85164	5.93886	5.85818	6.87815	6.93125	6.85681	6.83645	6.79781	6.89781	6.05005	6.05232	5.77965	5.81581	5.48868	5.56788	5.59524	5.51567	5.87713	5.88289	6.88874	6.84402
ENSMUSG00000004849	Ap1s1	9.39061	9.32813	9.31772	9.36012	9.38863	9.21835	8.82811	8.88726	8.75631	8.93003	8.84421	8.84004	9.02958	8.96875	8.96697	8.91612	8.94485	9.08805	8.92226	8.94555	8.95893	9.1078	9.11563	9.28677	9.33045	9.31879	9.52771	9.50664	9.38256	9.27709	10.0497	10.3058	10.2782	10.2506	10.4875	10.4328	9.34549	9.32237	8.82389	8.87143	8.99917	8.94265	8.94225	9.17007	9.39232	9.38876	10.2112	10.3903
ENSMUSG00000004865	Srpk1	7.55709	7.49355	7.67711	7.51743	7.54552	7.49303	7.24492	7.18503	7.27992	7.16734	7.01462	7.15642	7.20863	7.18268	7.09736	7.14333	7.16027	7.10704	7.2165	7.13023	7.08957	7.02209	7.13915	7.18084	7.78461	7.75178	7.6782	7.66462	7.78928	7.70195	8.50037	8.44336	8.37512	8.40233	8.42443	8.24738	7.57592	7.51866	7.23662	7.11279	7.19566	7.13365	7.14543	7.11403	7.7382	7.71862	8.43962	8.35805
ENSMUSG00000004880	Lbr	4.08427	4.226	4.14223	4.19896	4.08939	4.17516	4.01726	4.0041	3.9776	3.97338	3.9778	3.98753	3.52767	3.56745	3.55884	3.64328	3.58833	3.5957	3.43225	3.41983	3.44783	3.46295	3.35435	3.41014	4.31785	4.43197	4.3232	4.35406	4.25081	4.35388	5.07011	5.12028	4.9846	5.05118	5.0921	5.16429	4.15083	4.1545	3.99965	3.97957	3.54756	3.59682	3.4333	3.40915	4.35767	4.31958	5.05833	5.10252
ENSMUSG00000004891	Nes	NA	NA	NA	NA	NA	NA	NA	NA	NA	NA	NA	NA	NA	NA	NA	NA	NA	NA	NA	NA	NA	NA	NA	NA	NA	NA	NA	NA	NA	NA	3.25519	3.26366	3.25833	3.40087	3.39657	3.37125	NA	NA	NA	NA	NA	NA	NA	NA	NA	NA	3.25906	3.38957
ENSMUSG00000004892	Bcan	6.62861	6.39499	6.40904	6.56153	6.43616	6.33201	6.0237	6.2252	6.13554	6.28651	6.0901	6.11743	6.00861	6.07326	5.91604	5.88342	5.9102	5.8533	5.94342	5.75641	5.93483	5.92916	5.8135	5.76164	6.08731	6.01983	5.98859	6.21535	6.07693	6.04585	7.11657	7.30553	7.407	7.14316	7.29792	7.35937	6.47754	6.44323	6.12815	6.16468	6.04094	5.90322	5.87822	5.83477	6.03191	6.11271	7.27637	7.26682
ENSMUSG00000004895	Prcc	5.7413	5.69649	5.57155	5.68819	5.62815	5.59306	5.03023	4.99866	5.03429	5.02975	4.87084	5.01289	5.42654	5.41095	5.28828	5.28544	5.4008	5.32608	5.40644	5.36223	5.29422	5.37729	5.35644	5.52103	5.33958	5.37009	5.36777	5.30367	5.32463	5.31134	6.25524	6.28743	6.15778	6.31593	6.23938	6.2385	5.66978	5.63647	5.02106	4.97116	5.41874	5.32484	5.3543	5.41825	5.35915	5.31321	6.23348	6.2646
ENSMUSG00000004896	Rrnad1	4.90759	4.85717	4.80735	4.88896	4.89457	4.84459	4.57304	4.44716	4.42415	4.51204	4.66051	4.47976	4.36275	4.29076	4.40911	4.31274	4.33615	4.24953	4.1791	4.18386	4.2441	4.22769	4.14259	4.20596	4.70024	4.69442	4.73174	4.76794	4.68379	4.64337	5.54438	5.58578	5.6604	5.60924	5.63549	5.5786	4.85737	4.87604	4.48145	4.55077	4.32675	4.35267	4.20235	4.19208	4.7088	4.69837	5.59685	5.60777
ENSMUSG00000004897	Hdgf	7.42222	7.13006	7.16277	7.1614	7.34352	7.15128	6.91937	6.91681	6.74913	7.05311	6.80701	6.91457	7.08629	6.96518	6.83202	6.83035	6.78439	6.95905	7.05663	6.89041	6.98792	7.04885	7.05883	7.06602	7.30932	7.19006	7.25785	7.21185	7.15748	7.11982	8.07574	8.09334	8.04048	8.06077	7.90144	7.96925	7.23835	7.21873	6.86177	6.9249	7.02573	6.81559	6.97832	7.0579	7.25241	7.16305	8.06985	7.97715
ENSMUSG00000004902	Slc25a18	NA	NA	NA	NA	NA	NA	NA	NA	NA	NA	NA	NA	NA	NA	NA	NA	NA	NA	NA	NA	NA	NA	NA	NA	NA	NA	NA	NA	NA	NA	2.43441	2.39744	2.446	2.4276	2.44599	2.44437	NA	NA	NA	NA	NA	NA	NA	NA	NA	NA	2.42595	2.43932
ENSMUSG00000004929	Thop1	7.35348	7.34551	7.2148	7.2716	7.36193	7.1757	6.84618	6.74818	6.78982	6.81785	6.44011	6.77404	7.07846	7.03004	6.92682	6.96515	6.96299	6.8544	6.75345	6.88236	6.97323	6.94024	7.10215	7.0185	7.24261	7.26042	7.18059	7.26546	7.25261	7.23144	8.07688	8.30124	8.34315	8.278	8.43026	8.31979	7.3046	7.26974	6.79473	6.67733	7.05425	6.95165	6.86968	7.0203	7.22787	7.24984	8.24042	8.34268
ENSMUSG00000004931	Apba3	3.48723	3.45053	3.56647	3.42621	3.53594	3.52037	2.63929	2.61081	2.60503	2.7144	2.64885	2.62715	2.174	2.19523	2.20324	2.22544	2.21329	2.2278	3.3758	3.33836	3.3484	3.33394	3.46635	3.39125	3.14857	3.15907	3.10905	3.12465	3.08639	3.09053	4.05047	4.00764	3.99762	4.0425	4.06427	4.05816	3.50141	3.49417	2.61838	2.66347	2.18462	2.21399	3.35419	3.39718	3.1389	3.10052	4.01858	4.05498
ENSMUSG00000004933	Matk	7.447	7.2427	6.9689	7.28135	7.07684	6.96879	6.59009	6.60265	6.3704	6.39659	6.51136	6.50817	6.80023	6.83716	6.66923	6.65332	6.74888	6.87079	6.94771	6.82453	6.95894	7.01076	6.97989	6.97584	6.77484	6.95559	6.84221	6.87442	7.05029	6.6777	7.74059	8.13318	8.07823	7.76748	7.8573	7.88244	7.21953	7.10899	6.52105	6.47204	6.81869	6.69048	6.91039	6.98883	6.85755	6.86747	7.984	7.83574
ENSMUSG00000004934	Pias4	5.64419	5.5963	5.59822	5.68526	5.63693	5.58507	5.47152	5.48905	5.46901	5.56135	5.68916	5.36304	5.40937	5.39327	5.44438	5.49517	5.33549	5.45826	5.46177	5.47518	5.57383	5.60895	5.61171	5.62708	5.84469	5.81546	5.80732	6.0089	6.01479	5.81175	6.785	6.86502	6.89088	6.86278	6.9182	6.9003	5.6129	5.63575	5.47653	5.53785	5.40132	5.42501	5.50359	5.61591	5.82249	5.94515	6.84696	6.89376
ENSMUSG00000004936	Map2k1	10.2659	10.2824	10.2899	10.2896	10.2275	10.2325	9.85096	10.1297	9.97416	10.0528	9.95943	9.98227	10.1831	10.112	10.1547	10.1027	10.1192	10.2164	10.3078	10.0935	10.3102	10.2123	10.229	10.1258	10.4222	10.6702	10.4807	10.3978	10.5506	10.4853	11.4354	11.5227	11.4785	11.4566	11.4193	11.4108	10.2794	10.2499	9.98495	9.99816	10.1476	10.1256	10.2372	10.189	10.5244	10.4779	11.4789	11.4289
ENSMUSG00000004937	Sgta	8.26289	8.36831	8.11509	8.26299	8.23187	8.17781	7.85029	7.82285	7.66251	7.59368	7.91116	7.86749	8.13991	8.00795	7.89509	8.05427	7.87859	7.99887	8.14927	7.99834	8.12477	8.14058	8.15871	8.06844	8.25199	8.33911	8.1125	8.25847	8.30866	8.09443	9.03154	9.18315	9.16453	9.27659	9.26667	9.11466	8.24876	8.22422	7.77855	7.79078	8.07393	7.94265	8.09079	8.12257	8.23453	8.22052	9.12641	9.21931
ENSMUSG00000004945	Tmem242	5.10918	5.0775	5.08495	5.17011	5.12681	5.09337	4.80541	4.82108	4.8563	4.71404	4.7578	4.86488	4.74797	4.81375	4.68264	4.74636	4.8153	4.73429	4.77123	4.75062	4.8	4.76823	4.8821	4.78048	4.72244	4.75453	4.84536	4.92477	4.86087	4.86022	5.93041	5.99079	6.22547	6.06785	6.23032	6.1142	5.09054	5.1301	4.8276	4.77891	4.78086	4.7481	4.77395	4.81027	4.77411	4.88195	6.04889	6.13745
ENSMUSG00000004947	Dtx2	3.53017	3.5802	3.5295	3.59034	3.5537	3.55592	2.87513	2.8722	2.89096	2.88468	2.84476	2.88281	3.2292	3.2331	3.30018	3.26884	3.22976	3.24356	3.49741	3.50774	3.42026	3.50333	3.46843	3.45947	3.71565	3.6872	3.66577	3.70018	3.65432	3.68406	4.45554	4.52572	4.47781	4.47811	4.59718	4.59243	3.54662	3.56665	2.87943	2.87075	3.23115	3.26626	3.47514	3.47708	3.68954	3.67952	4.48636	4.55591
ENSMUSG00000004961	Syt5	9.8922	9.83818	9.70691	9.73365	9.83534	9.91999	9.59551	9.57937	9.54695	9.5001	9.59453	9.80389	9.41721	9.51105	9.42726	9.45844	9.52425	9.52485	9.45022	9.31397	9.45545	9.31776	9.40441	9.50147	9.94731	9.76867	9.8633	9.74772	9.73225	9.72246	10.6448	10.4934	10.4513	10.5363	10.462	10.4138	9.81243	9.82966	9.57394	9.63284	9.46413	9.46998	9.40655	9.40788	9.85976	9.73415	10.5298	10.4707
ENSMUSG00000004980	Hnrnpa2b1	10.7786	10.8725	10.8828	10.8446	10.8052	11.0299	10.5486	10.7119	10.8082	10.8539	10.7587	10.7382	10.5463	10.5454	10.6591	10.3988	10.5755	10.5594	10.5516	10.5359	10.5192	10.4505	10.368	10.3711	11.0361	11.1235	11.0017	10.9812	11.0571	11.1193	11.8556	11.5831	11.6918	11.8758	11.8582	11.6457	10.8446	10.8933	10.6896	10.7836	10.5459	10.5445	10.5356	10.3966	11.0538	11.0525	11.7102	11.7933
ENSMUSG00000004994	Ccdc130	5.18132	5.05702	5.04437	5.10885	5.10891	5.06596	4.91568	4.88549	4.81174	4.92492	5.05793	4.77065	4.95613	4.91832	4.8835	4.87105	4.82546	4.8867	4.86132	4.64924	4.72669	4.76457	4.69158	4.75923	4.93051	4.94563	4.95066	5.00295	4.91282	4.85786	6.11126	6.09845	5.99593	6.14446	6.09185	6.17751	5.09424	5.09458	4.87097	4.91783	4.93722	4.86	4.74575	4.73846	4.94227	4.92454	6.06855	6.13794
ENSMUSG00000004996	Mri1	4.93479	4.91476	4.86331	4.9228	4.90344	4.8555	4.33921	4.37419	4.43648	4.37592	4.46724	4.48945	4.71677	4.76624	4.82989	4.69662	4.8176	4.77561	4.9864	4.89442	5.00671	4.9969	5.07518	4.81352	4.73631	4.86022	4.7197	4.63811	4.73601	4.64032	5.8186	5.95748	5.96018	6.03762	5.94685	6.08421	4.90429	4.89391	4.38329	4.4442	4.74151	4.78137	4.96251	4.96187	4.77207	4.67148	5.91209	6.02289
ENSMUSG00000005034	Prkacb	9.9469	9.97911	9.98485	9.85545	9.91358	10.0571	9.68967	9.62449	9.66518	9.65721	9.73118	9.86895	9.47499	9.43574	9.5709	9.53941	9.69503	9.57745	9.71244	9.70803	9.63379	9.58087	9.55241	9.82669	10.2467	9.86707	9.96536	9.6432	9.8074	9.92812	10.8746	10.5878	10.8732	10.5943	10.4594	10.6502	9.97029	9.94203	9.65978	9.75245	9.45537	9.60178	9.68475	9.65333	10.0264	9.79291	10.7785	10.568
ENSMUSG00000005043	Sgsh	2.09993	2.12475	2.07072	2.09369	2.12581	2.11252	2.53051	2.51747	2.47947	2.4704	2.45074	2.52727	2.88712	2.79777	2.83963	2.86547	2.85091	2.8436	3.00573	2.99869	3.00839	2.96025	2.98626	3.02079	3.37457	3.34049	3.41666	3.37217	3.43575	3.3461	3.72283	3.79613	3.77116	3.77874	3.69179	3.67388	2.09847	2.11067	2.50915	2.4828	2.84245	2.852	3.00427	2.9891	3.37724	3.38467	3.76338	3.7148
ENSMUSG00000005045	Chd5	8.7821	8.74172	8.63493	8.765	8.79239	8.49228	8.46278	8.24986	8.14387	8.18261	8.55146	8.14254	8.32814	8.22992	8.24581	8.26398	8.34181	8.46699	8.23595	8.27802	8.18066	8.3475	8.34226	8.57706	8.71321	8.85832	8.60832	8.57276	8.65753	8.59513	9.50485	9.36659	9.45144	9.32567	9.31179	9.39554	8.71958	8.68322	8.2855	8.2922	8.27903	8.28387	8.23154	8.42227	8.72662	8.60847	9.44096	9.34433
ENSMUSG00000005054	Cstb	6.46766	6.54607	6.46546	6.3075	6.38105	6.4807	6.14137	6.10306	6.16417	6.24755	6.15561	6.26927	5.90518	5.86561	5.89805	5.85615	5.8923	5.84893	5.83698	5.91795	5.79155	5.84503	5.87056	5.88485	6.34117	6.54634	6.52602	6.40771	6.43245	6.56212	7.25839	7.3457	7.34139	7.352	7.60033	7.39276	6.49306	6.38975	6.1362	6.22414	5.8854	5.88217	5.84883	5.86682	6.47118	6.46743	7.31516	7.44836
ENSMUSG00000005057	Sh2b2	NA	NA	NA	NA	NA	NA	NA	NA	NA	NA	NA	NA	NA	NA	NA	NA	NA	NA	NA	NA	NA	NA	NA	NA	NA	NA	NA	NA	NA	NA	1.51472	1.5438	1.53328	1.56461	1.56105	1.5128	NA	NA	NA	NA	NA	NA	NA	NA	NA	NA	1.5306	1.54615
ENSMUSG00000005069	Pex5	7.04933	7.05172	6.95396	6.98307	7.02151	6.95566	6.82827	6.68969	6.66327	6.6394	6.98488	6.69786	6.66915	6.54102	6.5827	6.61685	6.5597	6.62246	6.59952	6.58711	6.62153	6.64046	6.74146	6.585	7.14153	7.08336	7.04792	7.13775	7.17883	7.07345	8.1107	8.12394	8.17938	8.22574	8.06141	8.04793	7.01834	6.98674	6.72708	6.77405	6.60508	6.58641	6.60272	6.65564	7.09094	7.13001	8.138	8.11169
ENSMUSG00000005078	Jkamp	7.36531	7.32325	7.2692	7.26697	7.39899	7.32915	7.06453	6.92332	6.9339	7.0401	7.07845	6.93834	6.97632	6.90557	6.961	6.88423	6.98128	6.99181	6.90282	6.90588	6.91867	6.98053	6.93894	7.03388	7.36836	7.24625	7.34301	7.20039	7.30792	7.23274	8.09029	8.17583	8.16967	8.11018	8.06147	8.17081	7.31925	7.3317	6.97392	7.01896	6.94094	6.94217	6.90912	6.98445	7.31921	7.24702	8.14526	8.11415
ENSMUSG00000005087	Cd44	4.18729	4.51767	4.2592	4.15292	4.4015	4.79252	4.28049	3.95737	4.23754	4.02314	4.21156	4.41064	NA	NA	NA	NA	NA	NA	2.92373	3.0068	2.85283	2.81721	2.85697	2.91123	3.80812	3.51634	3.55138	3.50235	3.52939	3.58766	4.7442	4.26795	4.36994	4.27716	4.37251	4.37487	4.32139	4.44898	4.15847	4.21512	NA	NA	2.92779	2.8618	3.62528	3.5398	4.46069	4.34151
ENSMUSG00000005089	Slc1a2	10.3662	10.3149	10.2153	10.181	10.1225	10.5414	10.1083	10.1592	10.1635	10.4633	10.1367	10.4567	9.96308	9.8954	9.9828	10.1118	10.0955	10.0979	10.2618	10.1547	10.3432	10.1017	10.1766	10.1112	10.7057	10.5731	10.583	10.6054	10.7145	10.6021	11.6725	11.4744	11.7095	11.4053	11.5487	11.5707	10.2988	10.2816	10.1437	10.3522	9.92924	10.0634	10.2533	10.1298	10.6206	10.6407	11.6188	11.5082
ENSMUSG00000005102	Eif2ak4	5.94255	5.9865	5.94694	5.98703	5.99205	6.02202	5.91408	5.88092	5.94927	6.08462	6.0261	5.83472	5.51154	5.62304	5.6592	5.68622	5.75441	5.68234	5.60259	5.48361	5.64748	5.57129	5.50162	5.62053	5.98228	5.98509	5.88239	5.90578	5.959	6.075	6.71485	6.8518	6.82496	6.72304	6.83283	6.75076	5.95866	6.00037	5.91476	5.98181	5.56729	5.69995	5.57789	5.56448	5.94992	5.97992	6.7972	6.76888
ENSMUSG00000005103	Wdr1	9.96426	10.0279	10.1153	10.0485	10.0817	10.0464	9.82439	9.86715	9.83721	9.84204	9.94144	9.7897	9.82671	9.85882	9.76712	9.81025	9.79936	9.86931	9.68402	9.70687	9.79337	9.79404	9.75709	9.67462	10.3063	10.3809	10.3848	10.4433	10.3682	10.3001	11.1668	11.1866	11.1826	11.2251	11.2497	11.2223	10.0358	10.0589	9.84292	9.85773	9.84276	9.79224	9.72809	9.74191	10.3573	10.3705	11.1787	11.2324
ENSMUSG00000005125	Ndrg1	6.02821	6.11649	6.23841	6.04612	6.23174	5.93542	6.02246	6.10365	5.78337	6.11464	5.97884	5.80098	6.02887	6.01154	6.08453	5.96909	6.07512	6.31335	5.59529	5.67626	5.49948	5.752	5.6668	5.68812	5.98481	6.28671	6.437	6.3244	6.2485	6.1194	6.92542	7.04967	6.97276	6.79826	6.73172	6.7109	6.1277	6.0711	5.96982	5.96482	6.0202	6.04291	5.59035	5.70231	6.23617	6.23076	6.98262	6.74696
ENSMUSG00000005142	Man2b1	7.57692	7.39169	7.37612	7.3461	7.43057	7.60178	7.0608	6.93962	6.94282	6.76224	7.13922	7.16324	6.8704	6.82009	6.87361	6.82256	6.91178	6.98624	7.01026	7.04117	7.04475	6.92464	7.03802	6.99163	7.42267	7.42352	7.43295	7.42175	7.58492	7.38623	8.3379	8.33628	8.28585	8.33301	8.33107	8.4214	7.44824	7.45948	6.98108	7.02157	6.84524	6.86932	7.03206	6.98476	7.42638	7.4643	8.32001	8.36183
ENSMUSG00000005148	Klf5	6.02707	6.07976	6.00166	6.10738	6.14686	6.21869	5.88101	5.6687	5.85928	5.74683	5.8301	6.14267	5.44776	5.33439	5.39149	5.503	5.4059	5.46716	5.52209	5.51577	5.31175	5.44348	5.2495	5.67271	6.66025	6.24582	6.1196	5.96563	5.96419	6.23312	6.52166	6.00767	6.32611	6.14847	6.04319	5.98741	6.03616	6.15764	5.803	5.90653	5.39107	5.43347	5.44987	5.45523	6.34189	6.05431	6.28515	6.05969
ENSMUSG00000005150	Wdr83	4.63032	4.68572	4.50675	4.65735	4.6493	4.61184	4.04542	4.00823	4.05245	4.07301	3.896	4.05959	4.20393	4.16389	4.22849	4.22895	4.20858	4.2475	4.54094	4.49771	4.56539	4.52744	4.55655	4.52916	4.88491	4.9418	4.99458	4.98446	5.06676	4.85719	5.81332	5.75952	5.66397	5.72277	5.59014	5.65478	4.6076	4.6395	4.03537	4.00953	4.18391	4.22201	4.53468	4.53772	4.94043	4.96947	5.7456	5.6559
ENSMUSG00000005161	Prdx2	8.88935	8.89809	9.09413	8.8628	8.91847	8.94406	8.67284	8.80752	8.70728	8.61092	8.88102	8.7367	8.84272	8.77876	8.71577	8.85053	8.75621	8.84772	9.01088	8.75323	8.93439	8.80937	8.89088	8.71202	9.17443	9.04183	8.98638	8.85291	9.14941	8.91793	10.0928	10.0977	10.1876	10.0594	9.98652	9.96968	8.96052	8.90844	8.72922	8.74288	8.81074	8.77417	8.8995	8.80409	9.06755	8.97341	10.126	10.0052
ENSMUSG00000005198	Polr2a	9.13774	9.14053	9.12544	9.19264	9.10074	8.98871	8.77285	8.68567	8.70986	8.67651	8.45347	8.49401	8.88338	8.87222	8.93789	8.82452	8.9421	8.84717	8.5669	8.80587	8.69692	8.90505	8.84891	8.93934	9.27059	9.43576	9.2803	9.39777	9.22183	9.37776	10.1291	10.1046	10.216	10.2409	10.2343	10.3267	9.13457	9.09403	8.72279	8.54133	8.8778	8.90151	8.6899	8.89776	9.32888	9.33245	10.1499	10.2673
ENSMUSG00000005204	Senp3	5.88505	5.90493	5.8892	5.96358	5.93043	5.76364	5.71834	5.64701	5.6192	5.64214	5.8298	5.68003	5.74705	5.76749	5.62271	5.62909	5.59723	5.62158	5.79698	5.74474	5.75149	5.95216	5.98805	5.92741	5.87518	6.06128	5.85035	5.99414	6.00507	5.87178	6.73742	6.85332	6.8207	6.78219	7.00812	6.70522	5.89306	5.88588	5.66152	5.71732	5.75727	5.61634	5.7644	5.95587	5.92894	5.957	6.80382	6.83184
ENSMUSG00000005225	Plekha8	3.7253	3.73323	3.68377	3.67258	3.742	3.67287	3.40898	3.41382	3.40602	3.59395	3.33142	3.36907	3.2774	3.22977	3.19952	3.20772	3.2507	3.27055	3.10089	3.04504	3.07428	3.07145	3.00528	3.1079	3.6883	3.62857	3.656	3.7223	3.65498	3.62518	4.07797	4.12331	4.08076	4.01132	4.05821	4.04946	3.7141	3.69582	3.40961	3.43148	3.25358	3.21932	3.07341	3.06154	3.65763	3.66748	4.09401	4.03966
ENSMUSG00000005237	Dnah2	2.02343	1.99349	2.0166	2.0212	1.96994	1.97083	NA	NA	NA	NA	NA	NA	2.28057	2.23947	2.26964	2.22707	2.25886	2.24424	2.18019	2.18457	2.22671	2.21575	2.26668	2.20486	NA	NA	NA	NA	NA	NA	3.15435	3.08285	3.12828	3.18462	3.10495	3.08704	2.01117	1.98732	NA	NA	2.26002	2.25186	2.19716	2.2291	NA	NA	3.12183	3.12554
ENSMUSG00000005262	Ufd1	8.2069	8.24665	8.28615	8.23456	8.23707	8.32391	7.96197	8.03966	8.10038	8.05466	8.02163	8.14587	8.01997	7.9407	8.01582	7.91032	7.93566	8.00813	8.05968	7.99096	8.01562	8.03005	7.65332	7.88764	8.69167	8.70925	8.60302	8.57657	8.58444	8.64024	9.50746	9.38623	9.44805	9.55564	9.39494	9.33121	8.24657	8.26518	8.034	8.07405	7.98034	7.95393	8.02209	7.85701	8.66798	8.60042	9.44725	9.42726
ENSMUSG00000005267	Zfp287	5.36983	5.44746	5.44556	5.42934	5.46384	5.45679	4.98531	5.00577	5.12789	5.11245	4.76345	4.99865	5.27536	5.20209	5.15206	5.04251	5.16242	5.2204	5.24151	5.18337	5.13836	5.09226	5.08866	5.15993	5.56691	5.44159	5.4527	5.41763	5.4419	5.53184	6.53275	6.34941	6.51155	6.579	6.5384	6.4441	5.42095	5.44999	5.03966	4.95818	5.23873	5.119	5.18775	5.11362	5.48707	5.46379	6.46457	6.5205
ENSMUSG00000005268	Prlr	3.95326	4.0399	4.08987	4.0228	4.03853	4.13876	4.77077	4.59159	4.71795	4.88326	4.78317	4.71583	3.76462	3.8034	3.85294	3.96693	3.82455	3.87634	3.86397	3.75285	3.77132	3.72699	3.66612	3.77009	4.49195	4.44091	4.50882	4.42639	4.44202	4.48143	5.35474	5.27061	5.38017	5.46575	5.35736	5.50923	4.02768	4.0667	4.69344	4.79409	3.78401	3.88147	3.79605	3.72107	4.48056	4.44995	5.33517	5.44411
ENSMUSG00000005299	Letm1	7.94364	7.9783	7.85424	7.98903	7.99426	7.91426	7.60258	7.65699	7.62605	7.56152	7.62985	7.59729	7.90171	7.72286	7.73085	7.77589	7.70781	7.72147	7.63061	7.6567	7.71471	7.71968	7.86123	7.7436	8.08575	8.14296	8.09224	8.09424	8.04014	8.04368	8.78664	8.83947	8.84435	8.90128	8.77507	8.85895	7.9254	7.96585	7.62854	7.59622	7.81229	7.73818	7.66734	7.77484	8.10698	8.05935	8.82349	8.8451
ENSMUSG00000005312	Ubqln1	10.0315	10.1187	10.2277	10.1361	10.1374	10.2011	9.98726	9.95541	9.93413	10.0944	9.96274	10.0092	9.90937	9.85692	9.84892	9.86649	9.82289	9.80524	9.80484	9.84792	9.86327	9.69762	9.74294	9.63401	10.5354	10.4778	10.4419	10.3797	10.5172	10.4406	11.3509	11.1433	11.2275	11.2302	11.1247	11.0888	10.126	10.1582	9.95893	10.0221	9.88314	9.8461	9.83867	9.69153	10.4851	10.4458	11.2406	11.1479
ENSMUSG00000005338	Cadm3	11.1669	11.2352	11.2302	11.0835	11.2379	11.4149	10.9994	11.1441	10.9369	11.0386	11.078	11.147	10.8737	10.8416	10.8738	10.9592	10.9038	10.8714	11.0445	10.879	11.0088	10.8492	10.8773	10.8725	11.3315	11.173	11.329	11.241	11.4032	11.2764	12.1919	12.1941	12.0925	12.0747	11.9419	12.1751	11.2108	11.2454	11.0268	11.0879	10.8576	10.9122	10.9774	10.8664	11.2778	11.3069	12.1595	12.0639
ENSMUSG00000005354	Txn2	7.9146	7.92266	8.06107	8.0187	8.0063	8.00335	7.67372	7.70756	7.71724	7.71177	7.46746	7.62819	7.63196	7.74781	7.54533	7.72668	7.57133	7.56045	7.7943	7.70627	7.85188	7.64932	7.62723	7.58185	8.2944	7.93518	8.147	7.9769	8.27715	7.96862	9.06226	9.2174	9.27397	8.93238	8.88252	9.09814	7.96611	8.00945	7.69951	7.60247	7.68989	7.61444	7.78415	7.61947	8.12553	8.07422	9.18454	8.97101
ENSMUSG00000005357	Slc1a6	5.87088	5.7525	6.00744	5.77317	5.90523	5.84389	5.34014	5.33633	5.33519	5.38955	5.50884	5.423	5.35968	5.38225	5.34285	5.35702	5.28341	5.45293	5.22983	5.17616	5.34688	5.11835	5.18436	5.26144	5.77792	5.62438	5.73089	5.67417	5.73495	5.71013	6.62012	6.60085	6.52484	6.36982	6.32046	6.37779	5.87694	5.84076	5.33722	5.44046	5.37096	5.32776	5.25096	5.18805	5.71106	5.70642	6.58193	6.35603
ENSMUSG00000005360	Slc1a3	4.56322	4.62071	4.57225	4.50277	4.59762	4.6391	5.3051	5.30723	5.14107	6.3372	5.36674	5.43027	4.45333	4.37601	4.39247	4.47213	4.47727	4.48135	4.28376	4.16553	4.2192	4.15709	4.18701	4.17175	5.67776	5.68524	5.55987	5.6115	5.6199	5.5375	7.20272	6.81837	7.5936	7.27788	7.6137	7.65301	4.58539	4.57983	5.25113	5.7114	4.41467	4.44729	4.22283	4.17195	5.64095	5.58963	7.20489	7.51486
ENSMUSG00000005362	Crbn	8.93454	8.95162	9.11787	8.98809	9.03312	9.16952	8.80153	8.86933	9.04433	9.00872	8.88251	8.86203	8.71711	8.72083	8.87493	8.85572	8.78622	8.79805	8.48302	8.63311	8.57464	8.55615	8.53992	8.40945	9.34797	9.30097	9.35176	9.30942	9.38433	9.41241	10.2045	9.98127	10.0878	10.1405	10.1064	10.1047	9.00134	9.06358	8.90506	8.91775	8.71897	8.83896	8.56359	8.50184	9.33357	9.36872	10.0912	10.1172
ENSMUSG00000005370	Msh6	6.55267	6.75843	6.71927	6.78418	6.66673	6.7208	6.45399	6.28741	6.41507	6.30381	6.48719	6.34993	6.53844	6.46875	6.57142	6.56108	6.67145	6.46255	6.07099	6.26952	6.01899	6.20008	6.25043	6.13918	6.77173	6.80811	6.88279	6.87255	6.72711	6.95119	7.72157	7.68394	7.82192	7.73375	7.78385	7.75129	6.67679	6.7239	6.38549	6.38031	6.50359	6.60132	6.11983	6.19657	6.82088	6.85029	7.74248	7.7563
ENSMUSG00000005371	Fbxo11	9.77219	9.97561	10.0221	9.94428	9.95334	10.0372	9.67962	9.71288	9.86426	9.89249	9.77163	9.69428	9.66381	9.63235	9.62559	9.53768	9.59983	9.60043	9.4964	9.48268	9.47772	9.46867	9.39084	9.29071	10.1713	10.1162	10.0733	10.0691	10.0886	10.1275	11.0938	10.7929	10.8191	10.9168	10.7479	10.9061	9.92328	9.97827	9.75225	9.78613	9.64808	9.5877	9.4856	9.3834	10.1203	10.0951	10.9019	10.857
ENSMUSG00000005374	Tbl2	5.7935	5.74819	5.83598	5.74081	5.74571	5.79763	5.43614	5.47788	5.42873	5.50228	5.428	5.47021	5.61617	5.46792	5.50458	5.56542	5.42232	5.6033	5.88366	5.58362	5.70943	5.72692	5.6339	5.73368	5.89543	5.80318	5.77701	5.85462	5.95134	5.77009	6.80237	6.9017	6.72847	6.67911	6.72601	6.77381	5.79256	5.76138	5.44758	5.46683	5.54205	5.49744	5.72557	5.69817	5.82521	5.85868	6.81085	6.72631
ENSMUSG00000005378	Bud23	5.47538	5.59449	5.61777	5.60012	5.56982	5.4956	5.50823	5.39252	5.21576	5.65402	5.32708	5.26176	5.40507	5.25623	5.17716	5.2441	5.26031	5.21909	5.39065	5.1866	5.30625	5.35119	5.43804	5.43823	5.698	5.66237	5.56499	5.53517	5.69088	5.57785	6.63256	6.63169	6.56041	6.61754	6.62204	6.5932	5.56255	5.55518	5.37217	5.41428	5.33065	5.22719	5.2945	5.40915	5.64179	5.6013	6.60822	6.61092
ENSMUSG00000005410	Mcm5	4.31733	4.27378	4.19861	4.3433	4.21301	4.23916	4.02304	4.1639	4.09762	4.13605	3.988	4.14346	4.35502	4.37875	4.33875	4.33952	4.34789	4.3322	3.9995	3.96449	3.95522	4.00571	3.93421	3.93774	4.29472	4.2066	4.19653	4.24105	4.21503	4.21585	5.2457	5.347	5.36444	5.30888	5.46711	5.42992	4.26324	4.26516	4.09485	4.08917	4.36688	4.34205	3.97307	3.95922	4.23261	4.22398	5.31904	5.40197
ENSMUSG00000005413	Hmox1	3.67515	3.59989	3.7507	3.69669	3.61885	3.63316	3.27884	3.19874	3.16954	3.08275	3.09207	3.15449	3.30116	3.29636	3.30776	3.34071	3.30909	3.30897	3.61697	3.57333	3.58288	3.67955	3.55881	3.5313	4.03593	4.00978	3.99755	4.03801	4.16043	4.06254	5.28686	5.39067	5.37586	5.45931	5.52746	5.50223	3.67524	3.64957	3.21571	3.10977	3.29876	3.31919	3.59106	3.58989	4.01442	4.08699	5.35113	5.49633
ENSMUSG00000005417	Mprip	8.68203	8.79013	8.68516	8.73056	8.73623	8.41218	8.10984	8.25693	8.13065	8.04964	8.23666	7.92373	8.61355	8.42461	8.41633	8.35375	8.59336	8.57875	8.35416	8.53855	8.30705	8.61409	8.72642	8.61338	8.44678	8.69555	8.64862	8.56844	8.42063	8.43516	9.58974	9.47403	9.7138	9.62465	9.72547	9.74288	8.7191	8.62632	8.16581	8.07001	8.51908	8.45448	8.39992	8.6513	8.59699	8.47474	9.59252	9.69767
ENSMUSG00000005442	Cic	7.45376	7.44603	7.21581	7.5031	7.27525	7.15251	7.04535	6.77369	6.68793	6.58359	6.90501	6.89235	6.85425	6.9633	6.78885	6.93844	6.93528	6.8185	7.01282	7.1452	7.00697	7.02287	7.19809	7.12402	7.50138	7.59816	7.6032	7.59023	7.40961	7.42997	8.23854	8.1814	8.32163	8.3269	8.36131	8.36631	7.37186	7.31029	6.83566	6.79365	6.90878	6.88752	7.055	7.11499	7.56758	7.4766	8.24719	8.35151
ENSMUSG00000005447	Pafah1b3	4.35977	4.33209	4.33117	4.33105	4.35532	4.45801	4.64151	4.61516	4.57512	4.48058	4.59502	4.61733	4.67005	4.54592	4.56483	4.58534	4.67982	4.60873	4.62004	4.75054	4.65438	4.68967	4.66149	4.66693	5.23916	5.19362	5.15119	5.20092	5.08699	5.13889	5.93512	5.76889	5.95469	5.99233	5.81577	5.80489	4.34101	4.38146	4.6106	4.56431	4.60799	4.61	4.67499	4.6727	5.19466	5.14227	5.88623	5.871
ENSMUSG00000005469	Prkaca	9.69703	9.57249	9.40798	9.53927	9.56999	9.54253	9.16694	9.23714	9.17681	9.02094	9.24538	9.18991	9.31476	9.25905	9.28695	9.27158	9.23512	9.30405	9.22153	9.28012	9.23909	9.29035	9.40119	9.31343	9.57332	9.58092	9.66423	9.58959	9.63352	9.55763	10.4058	10.4617	10.4432	10.4093	10.3772	10.4163	9.55917	9.55059	9.19363	9.15208	9.28691	9.26455	9.24691	9.33499	9.60616	9.59358	10.4369	10.4009
ENSMUSG00000005481	Ddx39	4.6151	4.67923	4.62555	4.66627	4.63531	4.63584	4.29459	4.30647	4.37148	4.33978	4.14525	4.31373	4.37714	4.42588	4.40508	4.38713	4.43685	4.38884	4.31262	4.27631	4.26744	4.3232	4.18047	4.28454	4.6502	4.74272	4.73335	4.69619	4.6767	4.67138	5.70436	5.80739	5.75853	5.79288	5.86345	5.8395	4.63996	4.64581	4.32418	4.26625	4.40151	4.40969	4.28546	4.26273	4.70876	4.68142	5.75676	5.83194
ENSMUSG00000005483	Dnajb1	7.3094	7.07548	7.11384	7.21429	7.12518	7.21589	7.14875	6.98433	6.88374	7.52967	7.23452	7.03619	6.96427	6.75019	6.84314	6.83801	6.96641	6.77678	6.9659	6.77198	6.75215	6.88946	6.83957	6.96598	7.1837	7.02954	7.13756	7.08979	7.17742	7.07633	8.12729	8.30018	8.16173	8.01894	8.12947	7.94058	7.16624	7.18512	7.00561	7.2668	6.85723	6.88252	6.83001	6.89834	7.11693	7.11451	8.1964	8.02966
ENSMUSG00000005501	Usp40	2.64159	2.57064	2.57376	2.63379	2.56663	2.54819	3.04902	3.0121	3.05127	3.16669	3.08269	3.01368	NA	NA	NA	NA	NA	NA	2.04068	2.09295	2.08259	2.06865	2.12561	2.09811	2.9712	2.89122	2.97469	3.09521	2.88157	2.97852	3.60515	3.57033	3.5676	3.60179	3.6141	3.64871	2.59533	2.58287	3.03746	3.08768	NA	NA	2.07208	2.09746	2.9457	2.9851	3.58103	3.62154
ENSMUSG00000005505	Kbtbd4	7.08683	7.1963	7.24588	7.10539	7.15812	7.05505	6.79773	6.68793	6.78382	6.59805	6.94478	6.73843	6.64206	6.71564	6.61416	6.68487	6.61873	6.72036	6.47349	6.67225	6.58918	6.81363	6.66023	6.59113	7.1779	7.28697	7.24614	7.27978	7.14423	7.17188	8.08742	8.12942	8.04495	8.10358	8.09834	8.13918	7.17634	7.10619	6.75649	6.76042	6.67885	6.63925	6.57831	6.68833	7.237	7.19863	8.08727	8.1137
ENSMUSG00000005506	Celf1	9.63891	9.62604	9.69636	9.64602	9.58477	9.59159	9.30551	9.23403	9.26288	9.37729	9.17037	9.22648	9.39454	9.27617	9.33029	9.24334	9.22848	9.2484	9.1531	9.13404	9.1992	9.14089	9.11058	9.12502	9.62761	9.64839	9.68539	9.73646	9.74468	9.68708	10.5396	10.6086	10.5194	10.6318	10.5684	10.5851	9.65377	9.60746	9.26747	9.25804	9.33536	9.26737	9.16212	9.1255	9.6538	9.72274	10.5559	10.5951
ENSMUSG00000005510	Ndufs3	7.68546	7.76567	7.85976	7.86798	7.71716	7.79773	7.80729	7.67522	7.70539	7.55846	7.75377	7.91369	7.73556	7.69019	7.58313	7.65848	7.63417	7.68796	7.9188	7.54025	7.94968	7.692	7.70576	7.48432	8.23749	8.05829	8.04435	8.03471	8.19192	7.98197	9.1728	8.97006	9.1768	9.17757	9.05631	9.0914	7.7703	7.79429	7.7293	7.74197	7.71287	7.62526	7.80291	7.62736	8.11338	8.06953	9.10655	9.10842
ENSMUSG00000005514	Por	8.62626	8.57528	8.66818	8.55646	8.65663	8.43044	8.1312	8.18773	8.06175	8.38884	8.32375	7.94303	8.38566	8.37829	8.16964	8.18466	8.14657	8.26113	8.23813	8.16313	8.30058	8.28368	8.32881	8.24236	8.58782	8.60778	8.56822	8.58331	8.7216	8.48232	9.60013	9.66713	9.47226	9.69232	9.4798	9.65266	8.62324	8.54784	8.12689	8.21854	8.38198	8.16696	8.23394	8.28495	8.58794	8.59574	9.57984	9.60826
ENSMUSG00000005533	Igf1r	7.0091	6.83283	6.78989	6.83761	6.81378	6.79504	6.61124	6.51498	6.47803	6.59103	6.55343	6.4437	6.52918	6.46223	6.42452	6.45897	6.44026	6.47825	6.77171	6.74293	6.78425	6.78889	6.73562	6.85174	7.26187	7.27801	7.09605	7.14523	7.23101	7.14728	8.01054	8.12149	8.02029	8.09764	8.00819	8.12133	6.87727	6.81548	6.53475	6.52939	6.49571	6.44125	6.7663	6.79208	7.21198	7.17451	8.05077	8.07572
ENSMUSG00000005534	Insr	7.70889	7.66548	7.81691	7.80012	7.72303	7.69744	7.43562	7.25458	7.22949	6.89687	7.46454	7.43636	7.05494	7.29986	7.20076	7.14739	7.18613	7.25711	7.28787	7.12119	7.43027	7.32075	7.28765	7.36541	7.91292	7.68147	7.91609	8.01646	7.90003	7.78568	8.61593	8.77476	8.66369	8.60326	8.60869	8.72778	7.73043	7.7402	7.30656	7.26592	7.1774	7.17809	7.27978	7.3246	7.83682	7.90072	8.68479	8.64657
ENSMUSG00000005566	Trim28	8.88293	8.87308	8.82801	8.96718	8.88097	8.75453	8.58124	8.46836	8.38082	8.34203	8.375	8.41887	8.51009	8.59878	8.56379	8.57514	8.58607	8.56408	8.63492	8.47805	8.48985	8.69278	8.76785	8.59798	8.84835	8.93006	8.92067	9.00051	8.88455	8.93713	9.83291	9.92299	9.96899	9.94159	9.91505	9.99091	8.86134	8.86756	8.47681	8.37863	8.55443	8.575	8.53428	8.6862	8.89969	8.94073	9.9083	9.94918
ENSMUSG00000005575	Ube2m	9.10894	9.09764	9.03922	9.08912	9.12976	9.20224	8.85551	8.86806	8.92439	8.95406	9.15592	9.06506	8.79521	8.84285	8.80004	8.89712	8.79431	8.75117	8.63558	8.77172	8.74973	8.58361	8.70743	8.6422	9.34364	9.34702	9.41552	9.45884	9.41472	9.33755	10.2033	10.1175	10.2047	10.13	10.2493	10.031	9.08194	9.14037	8.88265	9.05835	8.81903	8.83049	8.71901	8.64441	9.36873	9.4037	10.1751	10.1368
ENSMUSG00000005580	Adcy9	9.47217	9.31308	9.29404	9.44177	9.38319	9.07635	8.9659	8.93061	8.75565	8.79938	8.703	8.65346	8.90469	8.97329	8.86475	8.89332	8.84638	8.91569	8.9177	8.78841	8.92947	8.99648	8.84468	8.89572	9.22582	9.18624	9.22536	9.28426	9.25504	9.16391	10.087	10.3384	10.0162	10.2124	10.2803	10.4244	9.35976	9.30044	8.88405	8.71861	8.93899	8.86815	8.87853	8.91229	9.21247	9.2344	10.1472	10.3057
ENSMUSG00000005583	Mef2c	9.21575	9.34496	9.26572	9.17501	9.2018	9.77726	9.14182	8.87751	9.05538	8.6483	9.01911	9.65034	8.54881	8.44768	8.65699	8.86575	9.06505	8.56527	9.16938	9.27132	8.51606	8.77786	8.59353	9.21753	9.78386	9.09705	9.07629	8.74642	8.66184	9.29012	10.0278	9.1841	9.94498	9.69796	9.55862	9.45667	9.27548	9.38469	9.0249	9.10592	8.49824	8.8626	8.98559	8.86297	9.31907	8.89946	9.71897	9.57108
ENSMUSG00000005609	Ctr9	8.23538	8.37158	8.32433	8.28491	8.30389	8.25192	7.99337	8.0598	8.05306	8.17756	8.30614	7.88717	7.94695	7.94743	7.95874	7.93298	8.06247	8.07149	7.76765	8.02098	7.87374	8.00276	7.96028	7.84244	8.42802	8.58784	8.54299	8.56784	8.51946	8.56177	9.45882	9.29565	9.33595	9.38098	9.42578	9.39306	8.31043	8.28024	8.03541	8.12362	7.94719	7.98473	7.88745	7.93516	8.51962	8.54969	9.36347	9.39994
ENSMUSG00000005610	Eif4g2	10.038	10.0636	10.1388	10.0101	10.0212	10.343	9.86429	10.0687	10.0813	10.0721	9.88492	10.2128	9.64822	9.71967	9.88483	9.86934	9.92245	9.69216	9.75158	9.82235	9.79325	9.55403	9.61073	9.56531	10.3204	10.2269	10.3916	10.3935	10.4117	10.4378	11.1163	11.1562	10.9886	10.9446	11.2008	10.885	10.0801	10.1248	10.0048	10.0566	9.68394	9.89221	9.78906	9.57669	10.313	10.4143	11.087	11.0101
ENSMUSG00000005615	Pcyt1a	5.44678	5.30918	5.48437	5.46442	5.45051	5.47186	5.13258	5.11012	5.07631	5.14671	5.04692	5.16318	4.97632	5.00897	5.07627	5.08866	5.00332	5.04371	5.01632	4.91303	4.9457	5.06529	5.00453	4.96234	5.48989	5.59866	5.47242	5.42483	5.41257	5.42128	6.27673	6.18021	6.31976	6.28593	6.17543	6.31253	5.41344	5.46226	5.10634	5.11894	4.99264	5.05608	4.95835	5.01072	5.52032	5.41956	6.2589	6.25796
ENSMUSG00000005621	Zfp592	5.40563	5.48505	5.38918	5.3866	5.39945	5.31698	5.41426	5.24805	5.36354	5.31922	5.29762	5.3124	5.39764	5.43405	5.4372	5.39075	5.42862	5.45161	5.41052	5.40128	5.40104	5.47272	5.51392	5.49312	5.72045	5.82406	5.68526	5.84599	5.6744	5.74873	6.54618	6.69276	6.64521	6.58323	6.62704	6.64713	5.42662	5.36768	5.34195	5.30974	5.41585	5.41886	5.40428	5.49325	5.74326	5.75637	6.62805	6.61913
ENSMUSG00000005625	Psmd4	8.63507	8.54884	8.57408	8.59437	8.611	8.67155	8.42195	8.47332	8.24317	8.53187	8.59829	8.55379	8.64796	8.4756	8.41193	8.4241	8.39279	8.49015	8.52987	8.3204	8.50752	8.42259	8.36228	8.3764	8.89918	8.74358	8.85382	8.80573	8.98444	8.74493	9.63689	9.64186	9.69045	9.65583	9.61945	9.71354	8.586	8.62564	8.37948	8.56131	8.56178	8.40961	8.4526	8.38709	8.8322	8.84504	9.6564	9.66294
ENSMUSG00000005656	Snx6	7.00489	7.02924	7.12756	7.00578	7.0944	7.16467	7.01531	6.95548	7.06493	7.12699	6.85707	6.97863	6.86549	6.84276	6.99093	6.83032	6.89636	6.89411	6.59662	6.68394	6.78535	6.65096	6.56381	6.54383	7.44612	7.4538	7.43056	7.37482	7.37437	7.52074	8.37249	8.30659	8.20097	8.2446	8.1745	8.22931	7.0539	7.08828	7.0119	6.98756	6.85412	6.90587	6.68864	6.5862	7.44349	7.42331	8.29335	8.21614
ENSMUSG00000005667	Mthfd2	3.31135	3.33649	3.29185	3.31252	3.31076	3.36595	3.163	3.1795	3.16034	3.14711	3.19572	3.06416	3.43542	3.3859	3.38758	3.3675	3.35191	3.31921	3.25202	3.21714	3.22703	3.30995	3.23477	3.21736	3.79051	3.73541	3.71542	3.76139	3.77597	3.72363	4.64826	4.56072	4.53837	4.58167	4.54672	4.54243	3.31323	3.32974	3.16761	3.13566	3.41066	3.369	3.23206	3.25403	3.74711	3.75367	4.58245	4.55694
ENSMUSG00000005672	Kit	9.84721	9.92469	10.0199	9.91788	9.90795	9.90964	9.77038	9.88192	9.72133	9.82097	9.9154	9.69599	9.40655	9.42497	9.57581	9.47512	9.47482	9.7438	9.30675	9.47075	9.24711	9.36489	9.36782	9.39245	9.99823	10.1357	10.4667	10.1657	10.0234	10.1586	10.7554	10.7108	10.6364	10.5539	10.6082	10.7135	9.93059	9.91182	9.79121	9.81079	9.41576	9.50858	9.34154	9.37506	10.2002	10.1159	10.7009	10.6252
ENSMUSG00000005674	Tomm40l	5.64679	5.45151	5.35818	5.58934	5.43437	5.4418	4.86615	4.96099	4.85696	4.72833	5.01939	4.84476	5.4315	5.42525	5.41864	5.56715	5.42457	5.42864	5.14062	5.10299	5.19583	5.23964	5.21621	5.28043	5.19443	5.21851	5.09318	5.20547	5.21998	5.11137	6.2014	6.28384	6.25037	6.09221	6.15598	6.18757	5.48549	5.4885	4.8947	4.86416	5.42838	5.47012	5.14648	5.24543	5.16871	5.17894	6.24521	6.14525
ENSMUSG00000005682	Pan2	4.5849	4.64671	4.54047	4.62612	4.57734	4.59581	4.09623	4.14377	4.19002	4.21221	3.99182	4.13021	4.18847	4.23921	4.33868	4.26838	4.25525	4.26166	4.39423	4.30977	4.31843	4.28701	4.29913	4.33293	4.84814	4.82755	4.84901	4.76318	4.81135	4.89724	5.60432	5.63259	5.5829	5.64429	5.71623	5.75301	4.59069	4.59976	4.14334	4.11142	4.21384	4.28744	4.34081	4.30636	4.84157	4.82392	5.60661	5.70451
ENSMUSG00000005683	Cs	9.75851	9.83625	9.78635	9.84032	9.8389	9.86344	9.47707	9.62459	9.41922	9.44684	9.46182	9.48838	9.53782	9.5706	9.50948	9.54652	9.57831	9.69741	9.50372	9.55836	9.46699	9.63414	9.57967	9.57615	9.8646	10.0745	10.0357	9.93323	9.92532	9.96346	10.8311	10.8949	10.8669	10.9578	10.8675	10.8507	9.79371	9.84755	9.50696	9.46568	9.55421	9.54477	9.50969	9.59665	9.9916	9.94067	10.8643	10.892
ENSMUSG00000005686	Ampd3	3.64985	3.65711	3.65783	3.66805	3.65465	3.67713	3.73173	3.75635	3.68237	3.71109	3.76558	3.72956	3.50133	3.51344	3.54315	3.53576	3.51161	3.52343	3.63535	3.65713	3.51075	3.60413	3.62384	3.63151	4.07461	4.14637	4.00428	4.10629	4.15467	4.08258	4.5589	4.54045	4.7371	4.6336	4.63592	4.58162	3.65493	3.66661	3.72348	3.73541	3.50738	3.53017	3.60108	3.61982	4.07509	4.11451	4.61215	4.61705
ENSMUSG00000005687	Bcas2	7.84017	7.86076	7.91714	7.79107	7.76983	7.90372	7.4183	7.71751	7.71082	7.55399	7.96219	7.73907	7.5681	7.4935	7.43573	7.4166	7.34012	7.65266	7.71954	7.36151	7.78853	7.57543	7.44885	7.53665	8.14777	7.96167	7.99056	7.98731	8.11977	8.02872	8.94691	8.80804	9.07313	9.0128	8.65822	8.87774	7.87269	7.82154	7.61554	7.75175	7.5308	7.39749	7.62319	7.52031	8.03334	8.04527	8.94269	8.84959
ENSMUSG00000005698	Ctcf	8.35944	8.21282	8.44737	8.30732	8.2648	8.28135	8.15517	8.20051	8.10281	8.31995	8.32032	8.12791	7.96537	7.95048	7.95931	7.89769	7.90562	7.91819	7.88173	7.86404	7.89273	7.67388	7.63904	7.75941	8.46675	8.40189	8.34589	8.4416	8.48996	8.44208	9.30658	9.14724	9.10966	9.31585	9.08914	9.22438	8.33987	8.28449	8.15283	8.25606	7.95793	7.92087	7.8795	7.69077	8.40484	8.45788	9.18783	9.20979
ENSMUSG00000005699	Pard6a	4.25894	4.21644	4.13913	4.17318	4.19655	4.20704	3.74228	3.71297	3.62562	3.6538	3.70509	3.7257	4.10083	3.98475	4.05409	4.11832	4.04546	4.12112	4.00072	4.01429	3.98694	3.98543	3.97649	4.11154	4.3088	4.25242	4.28373	4.27226	4.42912	4.21517	5.03484	5.23758	5.15133	5.05718	5.10057	5.13585	4.20483	4.19226	3.69363	3.69486	4.04279	4.07263	4.00065	4.02449	4.28165	4.30552	5.14125	5.09787
ENSMUSG00000005716	Pvalb	2.97947	2.91761	3.28693	2.97201	2.95624	2.96102	NA	NA	NA	NA	NA	NA	NA	NA	NA	NA	NA	NA	NA	NA	NA	NA	NA	NA	NA	NA	NA	NA	NA	NA	3.22226	3.17667	3.36112	3.22924	3.18573	3.27585	3.06134	2.96309	NA	NA	NA	NA	NA	NA	NA	NA	3.25335	3.23028
ENSMUSG00000005718	Tfap4	2.73384	2.73603	2.80633	2.79995	2.79206	2.7131	2.49291	2.41376	2.46454	2.41763	2.39768	2.46218	2.89875	2.92532	2.91619	2.86997	2.93783	2.89014	3.18714	3.11131	3.17283	3.19267	3.21663	3.1613	3.36591	3.35775	3.38743	3.40718	3.34394	3.36747	3.90821	3.91829	3.9145	3.97783	3.83524	3.8739	2.75874	2.76837	2.45707	2.42583	2.91203	2.908	3.1571	3.1902	3.37036	3.37286	3.91367	3.89566
ENSMUSG00000005732	Ranbp1	8.40781	8.34249	8.41425	8.34826	8.36812	8.5506	8.43781	8.41705	8.4007	8.26118	8.43989	8.43162	7.96098	8.14911	8.06722	8.11635	8.07854	8.12073	7.9755	7.89948	8.07056	7.86683	7.93986	7.90527	8.50621	8.51559	8.52904	8.65319	8.66181	8.60346	9.40099	9.21557	9.20874	9.3121	9.36602	9.34935	8.38818	8.42233	8.41852	8.37756	8.05504	8.08737	7.98185	7.90399	8.51694	8.63948	9.2751	9.34249
ENSMUSG00000005774	Rfx5	4.99336	4.95295	4.90371	4.94614	4.87504	5.00464	4.74974	4.60466	4.62189	4.42536	4.61313	4.6336	4.48793	4.52343	4.59606	4.60467	4.62122	4.60159	4.57936	4.50031	4.50868	4.44411	4.50429	4.51266	4.8931	4.93863	4.91236	4.80994	4.92735	4.84327	5.83883	5.81789	5.65056	5.76465	5.79267	5.71813	4.95001	4.94194	4.65876	4.55736	4.50568	4.60732	4.52945	4.48702	4.9147	4.86019	5.76909	5.75848
ENSMUSG00000005779	Psmb4	9.28615	9.30202	9.23078	9.24539	9.22659	9.18322	8.96409	8.89477	8.85151	8.82194	9.02837	8.88611	9.06667	8.881	8.86608	8.94231	8.97705	8.94215	8.96043	8.78961	8.85569	8.9721	8.95687	8.885	9.18112	9.21387	9.41133	9.48196	9.28648	9.26787	10.1595	10.3089	10.3056	10.2622	10.3135	10.3211	9.27298	9.2184	8.90346	8.91214	8.97383	8.92848	8.86858	8.93799	9.26877	9.34544	10.258	10.2989
ENSMUSG00000005802	Slc30a4	6.91113	6.75803	6.96065	6.84521	6.85226	7.05081	6.58001	6.49807	6.60643	6.53023	6.34221	6.62605	6.34371	6.38574	6.41159	6.48154	6.4343	6.34435	6.35273	6.30307	6.31897	6.33153	6.23122	6.27615	7.0399	6.85434	6.87436	6.69954	6.80063	6.86143	7.58726	7.57762	7.61979	7.57202	7.43812	7.57279	6.8766	6.9161	6.5615	6.4995	6.36473	6.44248	6.32492	6.27963	6.92286	6.7872	7.59489	7.52764
ENSMUSG00000005804	Bloc1s6	5.97258	5.93319	5.96988	5.99644	6.04695	6.13895	5.92965	6.05503	6.0694	5.82308	6.20649	5.83889	5.82216	5.78127	5.5724	5.63258	5.68999	5.72045	5.99222	5.87608	5.96076	5.80436	5.8804	5.80226	6.35823	6.35307	6.28961	6.30169	6.27919	6.25865	7.18194	7.21822	7.05676	7.22902	7.096	7.22196	5.95855	6.06078	6.01803	5.95615	5.80171	5.63166	5.94302	5.82901	6.33364	6.27984	7.15231	7.18233
ENSMUSG00000005813	Metap1	7.57446	7.60184	7.61117	7.63213	7.57472	7.58544	7.14309	7.19338	7.18616	7.04363	6.91008	7.20452	6.84202	7.19653	7.12916	7.12455	7.03819	7.20798	7.08913	7.13906	7.21177	7.21211	7.14717	7.21455	7.62997	7.49367	7.60062	7.67399	7.5985	7.65856	8.31828	8.51563	8.42759	8.3253	8.40268	8.37719	7.59582	7.59743	7.17421	7.05274	7.01927	7.0973	7.14665	7.19128	7.57475	7.64368	8.4205	8.36839
ENSMUSG00000005823	Gpr108	4.96431	4.88729	4.87003	4.91999	4.96766	4.92808	4.6775	4.74046	4.7288	4.67754	4.56773	4.84947	4.50058	4.47712	4.46622	4.5243	4.48051	4.51844	4.71804	4.67055	4.64457	4.73217	4.72339	4.79561	5.00521	4.96796	5.05265	5.06918	5.09199	4.96872	5.89985	5.81905	5.8661	5.82144	5.79816	5.79245	4.90721	4.93857	4.71559	4.69825	4.48885	4.49034	4.67772	4.75039	5.00861	5.04329	5.86167	5.80402
ENSMUSG00000005846	Rsl1d1	8.69744	8.82763	8.89356	8.85201	8.77828	9.07082	8.54935	8.78207	8.85263	8.72006	8.76989	8.70374	8.33657	8.63636	8.6519	8.42249	8.5418	8.52947	8.32366	8.45279	8.37076	8.32228	8.22756	8.0822	9.09118	9.1485	9.20255	9.20886	9.02427	9.27308	9.85659	9.65399	9.7959	9.9741	9.86527	9.82486	8.80621	8.90037	8.72802	8.73123	8.48646	8.53873	8.3824	8.21068	9.14741	9.16874	9.76882	9.88808
ENSMUSG00000005871	Apc	9.49983	9.6152	9.50009	9.43366	9.50638	9.50193	9.27577	9.0356	9.21837	9.36296	9.03956	9.10106	9.10288	9.06704	9.1728	9.14769	9.25384	9.14288	8.86335	9.01597	8.91324	9.02329	9.05224	8.99667	9.63917	9.74227	9.58505	9.58314	9.53544	9.60979	10.5086	10.2042	10.3668	10.4897	10.2979	10.3132	9.53837	9.48066	9.17658	9.16786	9.08496	9.19145	8.93085	9.02407	9.6555	9.57612	10.3599	10.3669
ENSMUSG00000005873	Reep5	9.46177	9.57509	9.37989	9.42831	9.53342	9.73717	9.23436	9.45162	9.06589	9.07433	9.2848	9.23012	8.90063	9.19507	9.18453	9.13546	9.1672	9.27709	9.35578	9.25747	9.27418	9.18595	9.2053	9.18269	9.47122	9.26189	9.39756	9.36225	9.32937	9.19451	10.1529	10.1043	10.0955	9.84558	9.79377	9.8987	9.47225	9.5663	9.25062	9.19642	9.04785	9.1624	9.29581	9.19131	9.37689	9.29538	10.1176	9.84602
ENSMUSG00000005881	Ergic3	7.92903	7.97602	7.89948	8.00524	8.02332	8.07871	7.79287	7.82646	7.74599	7.60612	7.58453	7.9048	7.82457	7.77323	7.73216	7.78616	7.76099	7.74339	7.81407	7.7974	7.79406	7.61931	7.63557	7.79056	8.21733	8.133	8.30523	8.11234	8.21592	8.18301	8.85396	8.8552	8.82723	8.72909	8.77533	8.80845	7.93484	8.03576	7.78844	7.69849	7.7989	7.75977	7.80184	7.68181	8.21852	8.17042	8.84546	8.77096
ENSMUSG00000005882	Uqcc1	6.61765	6.41834	6.37978	6.38692	6.49387	6.47968	6.18504	6.29442	6.12474	6.05817	6.38064	6.19341	6.42243	6.15505	6.28384	6.17368	6.199	6.35674	6.32017	6.29135	6.24132	6.22562	6.12139	6.40097	6.48682	6.51579	6.46661	6.60796	6.38728	6.4009	7.33727	7.40527	7.39578	7.35665	7.37473	7.43542	6.47193	6.45349	6.2014	6.21074	6.28874	6.21884	6.28428	6.24933	6.48974	6.46538	7.37944	7.38893
ENSMUSG00000005886	Ncoa2	8.3626	8.31505	8.34624	8.23558	8.32926	8.17031	7.93266	7.80755	7.8436	7.98801	7.67585	7.67448	7.97638	7.941	7.90945	8.00588	7.87524	7.88336	7.77124	7.83583	7.61986	7.80674	7.68114	7.98343	8.3912	8.27611	8.2927	8.37102	8.33907	8.29305	9.10154	9.09982	9.16957	9.15258	9.11593	9.11286	8.34129	8.24505	7.86127	7.77945	7.95869	7.93019	7.74231	7.82377	8.32	8.33438	9.12364	9.12712
ENSMUSG00000005893	Nr2c2	8.10199	8.12083	8.10261	7.98526	8.06907	8.08912	7.75157	7.81473	7.7726	7.73953	7.7081	7.92883	7.78925	7.85184	7.8617	7.7873	7.8203	7.80365	7.71279	7.66393	7.76606	7.92573	7.72256	7.62903	8.21977	8.12751	8.27236	8.19565	8.16931	8.16242	9.06933	9.06172	9.08697	9.02986	9.05006	9.10285	8.10848	8.04782	7.77963	7.79215	7.82055	7.8231	7.71426	7.75911	8.20655	8.17579	9.07268	9.06093
ENSMUSG00000005897	Nr2c1	5.48702	5.38833	5.43044	5.43355	5.48138	5.37236	4.82585	4.85387	4.91276	4.72373	4.68848	4.87747	5.01259	4.95249	4.87601	4.88098	4.94028	5.06966	5.23836	5.13625	5.25475	5.16573	5.1844	5.14754	5.59141	5.57507	5.63488	5.46762	5.56388	5.65992	6.5192	6.47693	6.49592	6.47229	6.5005	6.66953	5.43526	5.4291	4.86416	4.76323	4.98254	4.89909	5.20979	5.16589	5.60046	5.56381	6.49735	6.54744
ENSMUSG00000005899	Smpd4	5.67848	5.76651	5.64347	5.9143	5.8459	5.80213	5.16055	5.43783	5.46673	5.29756	5.33895	5.55401	5.69721	5.71251	5.59999	5.53773	5.66919	5.64892	5.60025	5.55945	5.4111	5.63762	5.64086	5.55769	6.26999	6.2757	6.24703	6.39887	6.21661	6.17298	6.91947	6.73189	6.91616	7.07987	6.86145	6.90517	5.69615	5.85411	5.35503	5.39684	5.70486	5.6023	5.5236	5.61206	6.26424	6.26282	6.85584	6.94883
ENSMUSG00000005907	Pex1	5.73174	5.75582	5.8274	5.67025	5.77547	5.74861	5.49348	5.33968	5.47542	5.58101	5.45429	5.42185	5.46049	5.35895	5.32015	5.33122	5.2895	5.36972	5.3092	5.36574	5.30807	5.32921	5.30212	5.3884	6.03607	6.05526	5.93857	5.93669	5.97802	6.00367	6.79119	6.63965	6.81983	6.88064	6.8468	6.81993	5.77165	5.73144	5.43619	5.48572	5.40972	5.31362	5.32767	5.33991	6.00997	5.97279	6.75022	6.84912
ENSMUSG00000005936	Kctd20	6.91063	6.95526	6.98261	7.03408	7.02589	7.05864	6.85549	6.82031	6.89364	6.91224	6.99819	6.86196	6.56726	6.74694	6.68616	6.87389	6.68135	6.63803	6.27729	6.42926	6.32893	6.34443	6.39954	6.38866	7.14476	7.26796	7.43418	7.54791	7.22259	7.36478	8.00504	8.12063	8.03338	8.08787	8.11475	8.09752	6.9495	7.03954	6.85648	6.92413	6.6571	6.74713	6.34516	6.37754	7.2823	7.37843	8.05302	8.10005
ENSMUSG00000005949	Ctns	4.40701	4.4969	4.42002	4.41295	4.42442	4.4052	3.98331	4.10064	4.07988	4.09733	4.03124	3.99619	4.24086	4.16829	4.23384	4.18259	4.12423	4.1179	3.74367	3.79942	3.89466	3.73412	3.74336	3.82534	4.51162	4.43728	4.52082	4.38294	4.45528	4.3794	5.55272	5.46815	5.45625	5.55816	5.47723	5.5745	4.44131	4.41419	4.05461	4.04158	4.20458	4.18022	3.81258	3.76761	4.48991	4.40588	5.49237	5.53663
ENSMUSG00000005950	P2rx5	NA	NA	NA	NA	NA	NA	NA	NA	NA	NA	NA	NA	NA	NA	NA	NA	NA	NA	NA	NA	NA	NA	NA	NA	NA	NA	NA	NA	NA	NA	2.28707	2.27615	2.26878	2.2811	2.28489	2.28758	NA	NA	NA	NA	NA	NA	NA	NA	NA	NA	2.27733	2.28452
ENSMUSG00000005951	Shpk	2.93481	2.97148	2.94789	2.97586	3.00444	2.92973	NA	NA	NA	NA	NA	NA	2.49739	2.42962	2.46925	2.46194	2.49089	2.41254	2.33446	2.33913	2.27776	2.33136	2.27865	2.29728	2.45093	2.43475	2.44427	2.43024	2.44379	2.46138	4.23238	4.17687	4.20261	4.18115	4.17626	4.18028	2.9514	2.97001	NA	NA	2.4635	2.47403	2.31711	2.30243	2.44332	2.44514	4.20395	4.17923
ENSMUSG00000005958	Ephb3	6.4742	6.42717	6.33245	6.41553	6.45043	6.36555	5.94361	6.03479	6.03841	5.99279	5.86816	5.89719	6.02923	6.04624	5.97026	5.91992	5.93981	5.90029	5.65082	5.74998	5.75594	5.76569	5.62948	5.67963	6.37804	6.4189	6.25662	6.55781	6.27323	6.25824	7.18517	7.25547	6.9905	6.95957	7.11585	7.10033	6.41127	6.4105	6.00561	5.91938	6.03773	5.94333	5.71891	5.6916	6.35119	6.36309	7.14371	7.05858
ENSMUSG00000005968	Tuft1	3.26143	3.19257	3.19288	3.22514	3.16271	3.27	2.70833	2.75029	2.71923	2.72045	2.70527	2.77532	2.87303	2.85481	2.8762	2.87253	2.8586	2.84987	2.70513	2.7202	2.79764	2.76541	2.71176	2.75311	2.53018	2.49832	2.48572	2.47891	2.52823	2.53833	3.61295	3.60664	3.62206	3.59886	3.57628	3.57185	3.21562	3.21929	2.72595	2.73368	2.86392	2.86911	2.74099	2.74343	2.50474	2.51516	3.61388	3.58233
ENSMUSG00000005973	Rcn1	5.67716	5.51188	5.34706	5.48715	5.52849	5.7949	5.06412	5.10774	5.13079	5.14949	5.02453	5.22014	5.16263	5.16285	5.15791	5.28192	5.25849	5.38471	5.03615	5.08042	5.0802	4.92865	4.94111	5.1594	5.39499	5.17744	5.05297	5.01135	5.01388	5.09294	5.6175	5.51862	5.56011	5.39849	5.38954	5.46904	5.51204	5.60351	5.10089	5.13139	5.16274	5.23277	5.06559	5.00972	5.20847	5.03939	5.56541	5.41902
ENSMUSG00000005981	Trap1	8.2276	8.2426	8.31843	8.21027	8.20876	8.21221	7.86784	7.9408	7.96478	7.75417	7.57936	7.91094	7.91769	7.86403	7.773	7.93328	7.86701	7.90047	7.73287	7.81105	7.8277	7.91635	7.96537	7.78807	8.48357	8.61828	8.53955	8.44057	8.43546	8.51732	9.28394	9.35658	9.34116	9.35003	9.24842	9.34441	8.26288	8.21042	7.92447	7.74816	7.89086	7.85776	7.79054	7.88993	8.54714	8.46445	9.32723	9.31429
ENSMUSG00000005982	Naa60	5.76591	5.7868	5.76198	5.76596	5.77586	5.85663	5.38532	5.44606	5.44263	5.47789	5.53636	5.41481	5.24356	5.30289	5.18385	5.15561	5.28062	5.18378	5.00522	5.10458	5.03628	5.08197	5.05312	5.07287	5.58168	5.71515	5.58996	5.73895	5.61128	5.75757	6.26591	6.39957	6.39872	6.29698	6.2798	6.12966	5.77156	5.79948	5.42467	5.47635	5.27322	5.20669	5.04869	5.06932	5.62893	5.7026	6.35473	6.23548
ENSMUSG00000005983	1700037C18Rik	2.98383	3.00129	3.0294	3.02505	3.00303	3.03448	3.10302	3.1271	3.12949	3.12361	3.19763	3.24432	2.60421	2.64989	2.64951	2.64192	2.65339	2.69044	2.91192	2.9006	2.93022	2.91569	2.90671	2.91291	2.71649	2.72959	2.72227	2.79048	2.66394	2.71503	3.84052	3.86182	3.81077	3.87358	3.86237	3.80794	3.00484	3.02086	3.11987	3.18852	2.62705	2.64827	2.91425	2.91177	2.72278	2.72315	3.83771	3.84796
ENSMUSG00000005986	Ankrd13d	6.03777	5.87583	5.98907	5.94098	6.034	5.8036	5.5476	5.49037	5.44888	5.58772	5.756	5.56957	5.52681	5.42026	5.43115	5.41902	5.44962	5.36476	5.7506	5.6864	5.47562	5.78884	5.79485	5.8633	5.88932	6.00111	5.84331	5.81004	5.73329	5.76537	6.38554	6.4675	6.57169	6.48823	6.47928	6.39422	5.96756	5.92619	5.49562	5.63777	5.47354	5.43326	5.63754	5.81567	5.91125	5.76957	6.47491	6.45391
ENSMUSG00000006005	Tpr	9.74298	9.85341	10.0345	9.90152	9.8801	10.0711	9.62088	9.76782	9.73577	9.74406	9.69981	9.78671	9.40436	9.507	9.58812	9.49957	9.52347	9.58877	9.384	9.53346	9.48263	9.34965	9.32267	9.37316	10.1223	10.0802	10.0874	10.0982	10.0358	10.1124	10.9551	10.6189	10.6048	10.9998	10.8773	10.9457	9.87696	9.95091	9.70816	9.74353	9.45568	9.53705	9.4667	9.34849	10.0966	10.0822	10.7262	10.9409
ENSMUSG00000006010	Odr4	7.05048	7.124	7.11991	7.14042	7.13193	7.08474	6.6941	6.99565	6.97347	6.94089	6.82799	6.80272	6.60206	6.77205	6.78889	6.65958	6.76367	6.82048	6.65558	6.8	6.64644	6.76662	6.77358	6.59008	7.20294	7.3298	7.20505	7.38942	7.25476	7.30891	8.1675	7.98841	8.01679	8.02254	8.09804	8.0849	7.09813	7.11903	6.88774	6.8572	6.68705	6.73738	6.70067	6.7101	7.24593	7.31769	8.05756	8.06849
ENSMUSG00000006019	Dhx34	3.74005	3.68969	3.64506	3.68298	3.72096	3.70081	3.29191	3.29082	3.35009	3.2404	3.22849	3.25792	3.26254	3.36675	3.3132	3.31377	3.33707	3.3052	3.296	3.25077	3.28031	3.30014	3.27906	3.3345	3.64591	3.68442	3.62708	3.55802	3.69603	3.64134	4.5535	4.5939	4.57212	4.60794	4.66004	4.66008	3.6916	3.70158	3.31094	3.24227	3.31464	3.32135	3.2757	3.30457	3.65247	3.6318	4.57318	4.64268
ENSMUSG00000006021	Kptn	5.39059	5.41953	5.40823	5.39454	5.32363	5.40213	4.68309	4.87877	4.846	4.79703	4.67167	4.89482	5.00732	5.07471	5.12147	5.05831	5.13226	5.01793	5.17348	5.12531	5.20042	5.13801	5.21485	5.12918	5.46001	5.38725	5.42164	5.49851	5.52022	5.38925	6.30836	6.39817	6.29925	6.39238	6.38513	6.34344	5.40612	5.37343	4.80262	4.78784	5.04102	5.10401	5.1664	5.16068	5.42297	5.46933	6.33526	6.37365
ENSMUSG00000006024	Napa	10.026	9.89881	9.93685	9.8399	9.83261	9.7841	9.44839	9.58942	9.4053	9.43659	9.54901	9.44589	9.63653	9.66882	9.56137	9.51079	9.4493	9.58149	9.88271	9.55936	9.82726	9.8357	9.68114	9.78252	9.87211	9.78575	9.83658	9.86345	9.81117	9.71602	10.7404	10.9497	10.8482	10.8141	10.7563	10.9887	9.95389	9.81887	9.48104	9.47716	9.65267	9.50715	9.75644	9.76646	9.83148	9.79688	10.8461	10.853
ENSMUSG00000006050	Sra1	7.30533	7.20914	7.12477	7.2092	7.32115	7.14636	6.88516	6.76664	6.77263	6.81381	6.85935	6.81013	6.88119	6.89361	6.91414	6.89896	6.81141	6.98257	6.87527	6.72275	6.86135	6.85892	6.78378	6.8696	7.30139	7.35365	7.29691	7.22514	7.39858	7.08309	8.29424	8.20342	8.24669	8.25854	8.24969	8.31985	7.21308	7.22557	6.80814	6.82776	6.8874	6.87484	6.81979	6.83743	7.31731	7.2356	8.24812	8.27603
ENSMUSG00000006057	Atp5g1	2.94059	2.97803	3.00173	2.93506	2.9755	2.97341	2.38383	2.46345	2.37762	2.3661	2.3461	2.39038	3.00907	3.01605	3.08848	3.08867	3.14093	3.06191	2.46647	2.55586	2.41946	2.47275	2.55422	2.49634	2.60955	2.62537	2.63194	2.65369	2.59803	2.65163	3.42508	3.44999	3.51164	3.54626	3.49495	3.45231	2.97345	2.96132	2.4083	2.36753	3.01256	3.10603	2.4806	2.50777	2.62229	2.63445	3.46223	3.49784
ENSMUSG00000006058	Snf8	6.53259	6.64096	6.53198	6.55999	6.63323	6.65415	6.20745	6.41522	6.20813	6.23456	6.26941	6.20264	6.36321	6.40918	6.27305	6.30057	6.30528	6.4084	6.54042	6.35073	6.48957	6.3099	6.4019	6.17824	6.76235	6.72454	6.83115	6.71108	6.79052	6.54472	7.58115	7.50001	7.53234	7.53985	7.41493	7.53296	6.56851	6.61579	6.27693	6.23553	6.3862	6.29297	6.46024	6.29668	6.77268	6.68211	7.53783	7.49591
ENSMUSG00000006095	Tbcb	7.82049	7.76836	7.60623	7.74695	7.71187	7.64585	7.48938	7.42807	7.2723	7.37901	7.3785	7.3841	7.27502	7.21768	7.31156	7.32059	7.24487	7.39509	7.50838	7.37027	7.23524	7.47786	7.46605	7.4678	7.54703	7.63662	7.75031	7.63207	7.64555	7.55372	8.33996	8.56228	8.35013	8.36794	8.38125	8.24543	7.73169	7.70155	7.39658	7.38054	7.24635	7.29234	7.3713	7.47057	7.64465	7.61045	8.41746	8.33154
ENSMUSG00000006127	Inpp5k	7.10108	7.07835	7.05749	7.1716	7.05985	7.12539	6.76897	6.79815	6.79684	6.56384	7.13356	6.80673	6.81457	6.77138	6.7265	6.78039	6.70951	6.67227	6.68758	6.76079	6.81899	6.77269	6.86173	6.71564	7.5961	7.61634	7.42824	7.55733	7.43554	7.59426	8.27998	8.26626	8.40054	8.4353	8.24534	8.37959	7.07898	7.11895	6.78799	6.83471	6.79297	6.7388	6.75579	6.78335	7.54689	7.52905	8.3156	8.35341
ENSMUSG00000006134	Crkl	6.53455	6.60185	6.68252	6.54409	6.51001	6.76582	6.49809	6.2828	6.31621	6.55358	6.41024	6.51917	6.29867	6.28682	6.34336	6.49064	6.43427	6.26448	6.13804	6.24716	6.23566	6.30983	6.22921	6.28267	6.82938	6.87285	6.83436	6.75537	6.83477	6.86743	7.8793	7.82086	7.81829	7.79203	7.74097	7.68956	6.6063	6.60664	6.3657	6.49433	6.29274	6.42275	6.20695	6.2739	6.84553	6.81919	7.83948	7.74085
ENSMUSG00000006154	Eps8l1	2.24168	2.23904	2.17534	2.18769	2.17652	2.25419	NA	NA	NA	NA	NA	NA	2.72487	2.73901	2.72897	2.70533	2.81932	2.73357	2.27246	2.18143	2.26307	2.22121	2.18583	2.26089	2.79688	2.84339	2.85584	2.8769	2.85505	2.73788	3.04708	3.05738	3.13946	3.0932	3.13026	3.16416	2.21869	2.20613	NA	NA	2.73194	2.75121	2.23899	2.22264	2.83204	2.82327	3.08131	3.12921
ENSMUSG00000006169	Clint1	7.68733	7.79902	7.75912	7.65233	7.68169	7.78147	7.7035	7.49561	7.40401	7.64209	7.54923	7.3938	7.41784	7.38057	7.40037	7.37693	7.35692	7.43404	7.32905	7.19068	7.31593	7.31513	7.32051	7.32551	7.70843	7.70476	7.81582	7.78576	7.92518	7.7473	8.68963	8.7024	8.6208	8.60821	8.6207	8.58915	7.74849	7.70516	7.53437	7.52837	7.39921	7.37807	7.27855	7.32038	7.743	7.81942	8.67094	8.60602
ENSMUSG00000006191	Cdkal1	6.41256	6.4937	6.53301	6.44623	6.41385	6.35959	5.90936	5.95527	6.01969	5.95239	5.92772	5.96706	6.33278	6.13045	6.20784	6.13478	6.16416	6.12287	5.9845	6.10883	6.02832	6.04202	5.94568	6.01552	6.5655	6.72616	6.48127	6.59573	6.55707	6.64562	7.38489	7.38812	7.4035	7.5062	7.44164	7.40207	6.47976	6.40655	5.96144	5.94906	6.23161	6.16892	6.04055	6.00107	6.59098	6.59947	7.39217	7.44997
ENSMUSG00000006205	Htra1	6.51102	6.71306	6.79349	6.70628	6.77029	6.66644	6.54627	6.52531	6.42145	6.69505	6.47561	6.32464	6.35805	6.41111	6.32304	6.24836	6.18908	6.24424	6.33743	6.19031	6.29208	6.08576	6.05173	6.05953	6.68077	6.58021	6.73542	6.80643	6.80857	6.58383	7.97721	8.09507	8.12553	8.08274	8.11616	8.32776	6.67252	6.71434	6.49768	6.49843	6.38458	6.25349	6.27327	6.06567	6.66547	6.73294	8.06594	8.17555
ENSMUSG00000006215	Zbtb17	5.12241	5.06329	4.90404	5.14487	5.10273	4.93438	4.77871	4.70514	4.66317	4.56307	4.60227	4.61744	4.8963	4.92182	4.93433	5.00725	4.902	4.98321	4.84185	4.7996	4.84005	4.77213	4.87671	4.86076	5.14171	5.16668	5.02437	5.12654	5.21905	5.06035	6.2092	6.22989	6.16186	6.16951	6.22139	6.30615	5.02991	5.06066	4.71567	4.59426	4.90906	4.94786	4.82717	4.83653	5.11092	5.13531	6.20031	6.23235
ENSMUSG00000006235	Epor	1.92258	1.94866	1.90834	1.93614	1.92032	1.89759	NA	NA	NA	NA	NA	NA	NA	NA	NA	NA	NA	NA	1.91685	1.86543	1.89822	1.88338	1.92428	1.87286	2.07849	2.02448	2.05115	2.03024	2.0724	2.03687	2.66658	2.68634	2.6776	2.65832	2.66184	2.68559	1.92653	1.91802	NA	NA	NA	NA	1.8935	1.89351	2.05137	2.0465	2.67684	2.66858
ENSMUSG00000006241	Ccdc159	1.89394	1.94522	1.90507	1.93277	1.89398	1.94229	2.37193	2.4168	2.40804	2.43768	2.3949	2.42563	2.09357	2.10161	2.09357	2.10828	2.10433	2.05993	2.42477	2.41744	2.46899	2.39191	2.48075	2.42369	2.67055	2.65139	2.76871	2.67649	2.63948	2.6933	3.4701	3.54178	3.53392	3.48192	3.53066	3.46508	1.91474	1.92301	2.39892	2.41941	2.09759	2.10206	2.43707	2.43212	2.69689	2.66976	3.51527	3.49255
ENSMUSG00000006262	Mob1b	7.21318	7.14236	7.29019	7.31677	7.23985	7.43844	6.95126	6.9774	7.14499	7.04142	7.28634	7.12349	6.88435	6.83633	6.85965	6.79755	6.79299	6.77254	6.74789	6.80182	6.64273	6.75197	6.7217	6.63065	7.49906	7.56781	7.51873	7.57017	7.46016	7.55658	8.46693	8.25635	8.47204	8.4904	8.52521	8.5064	7.21524	7.33169	7.02455	7.15042	6.86034	6.81673	6.73081	6.70144	7.52853	7.52897	8.39844	8.50733
ENSMUSG00000006273	Atp6v1b2	11.4749	11.6942	11.7217	11.6003	11.6064	11.7652	11.3438	11.349	11.3562	11.2886	11.4115	11.4398	11.3648	11.2959	11.2965	11.3264	11.3345	11.4652	11.3864	11.2769	11.3717	11.376	11.2571	11.2441	11.8177	11.8346	11.846	11.732	11.8076	11.8296	12.7453	12.687	12.7884	12.8003	12.7277	12.8524	11.6302	11.6573	11.3496	11.38	11.3303	11.3191	11.345	11.2924	11.8328	11.7897	12.7402	12.7935
ENSMUSG00000006276	Eps15l1	7.34671	7.22961	7.44024	7.2724	7.3573	7.36893	6.99628	7.0628	6.94566	7.10211	6.99716	7.13123	6.84666	6.8497	6.89469	6.92393	6.99429	6.88208	7.05746	6.93779	7.01402	7.07403	6.8785	7.01918	7.30065	7.24204	7.3508	7.38966	7.48935	7.37201	8.11438	8.23001	8.16754	8.29973	8.18893	8.2169	7.33885	7.33288	7.00158	7.07683	6.84818	6.93764	7.00309	6.99057	7.29783	7.41701	8.17065	8.23518
ENSMUSG00000006281	Tep1	3.3663	3.30642	3.4044	3.28207	3.32086	3.36796	3.06738	2.90825	2.97549	3.02829	3.02107	2.9883	2.94274	2.8855	2.88426	2.94532	2.90561	2.86873	2.64335	2.66457	2.64425	2.64481	2.68308	2.69341	2.77624	2.78916	2.76044	2.76009	2.74913	2.87769	3.84427	3.8803	3.83349	3.84184	3.87925	3.80219	3.35904	3.32363	2.98371	3.01255	2.91412	2.91173	2.65072	2.67377	2.77528	2.79564	3.85268	3.84109
ENSMUSG00000006288	Ttc5	5.40074	5.37851	5.30669	5.42841	5.43541	5.39628	4.94147	5.00197	5.01134	4.9528	5.1042	5.03266	5.25342	5.0707	5.05014	5.17215	5.06429	5.20303	5.41665	5.28566	5.30017	5.25522	5.25237	5.31353	5.347	5.25308	5.29224	5.23048	5.2978	5.33129	6.46886	6.41741	6.64461	6.43911	6.45618	6.57609	5.36198	5.42003	4.98493	5.02989	5.16206	5.09553	5.33416	5.27371	5.29744	5.28652	6.51029	6.49046
ENSMUSG00000006289	Osgep	5.40192	5.41674	5.48109	5.37806	5.42548	5.32173	5.02541	5.03823	5.07489	4.91678	4.9435	4.94109	4.82518	4.94178	4.87499	4.87828	4.92556	4.89455	5.19148	5.04583	5.20638	5.20708	5.05574	5.15448	5.35384	5.43914	5.36987	5.24367	5.34305	5.28353	6.19276	6.34201	6.22112	6.13958	6.19079	6.26495	5.43325	5.37509	5.04618	4.93379	4.88348	4.89294	5.1479	5.1391	5.38762	5.29008	6.25196	6.19844
ENSMUSG00000006299	Aamp	8.60633	8.67535	8.53189	8.56115	8.67371	8.47847	8.44335	8.35011	8.15166	8.21653	8.0553	8.21506	8.2898	8.35857	8.30275	8.4261	8.23429	8.34764	8.34141	8.25001	8.31566	8.24321	8.30826	8.16073	8.59604	8.53339	8.59864	8.62802	8.57341	8.44216	9.54413	9.5689	9.49404	9.44524	9.53835	9.52196	8.60452	8.57111	8.31504	8.1623	8.32418	8.32105	8.30236	8.2374	8.57602	8.54786	9.53569	9.50185
ENSMUSG00000006301	Tmbim1	NA	NA	NA	NA	NA	NA	NA	NA	NA	NA	NA	NA	NA	NA	NA	NA	NA	NA	NA	NA	NA	NA	NA	NA	NA	NA	NA	NA	NA	NA	2.98184	2.97509	2.98199	3.05374	3.00342	3.00926	NA	NA	NA	NA	NA	NA	NA	NA	NA	NA	2.97964	3.02214
ENSMUSG00000006304	Arpc2	10.7729	10.8191	10.922	10.8882	10.8961	10.7371	10.6365	10.677	10.6761	10.7802	10.4973	10.4571	10.4444	10.6217	10.5044	10.3797	10.3326	10.3685	10.4174	10.3672	10.3805	10.4624	10.2263	10.0816	10.7219	10.8422	10.7884	10.9203	10.8538	10.9054	11.6653	11.8552	11.5916	11.9294	11.9378	11.9225	10.838	10.8404	10.6632	10.5782	10.533	10.4056	10.3884	10.2568	10.7842	10.8932	11.704	11.9299
ENSMUSG00000006307	Kmt2b	5.35343	5.31246	5.33173	5.40463	5.37921	5.27529	5.31622	5.19015	5.13522	5.33083	5.45318	5.15255	5.09263	5.15386	5.26124	5.28385	5.14327	5.16601	5.19942	5.22149	4.97499	5.25513	5.11706	5.15035	5.50075	5.52632	5.45326	5.46768	5.51454	5.58452	6.51872	6.52151	6.56123	6.55424	6.51086	6.52408	5.33254	5.35304	5.21386	5.31218	5.12325	5.22945	5.13197	5.17418	5.49344	5.52225	6.53382	6.52973
ENSMUSG00000006315	Tmem147	6.72605	6.56656	6.44793	6.61445	6.61879	6.46908	6.20558	6.20924	6.3371	6.239	6.13623	6.30364	6.28996	6.27487	6.30961	6.3171	6.1819	6.33631	6.36089	6.39218	6.54243	6.35526	6.46602	6.39584	6.56726	6.68382	6.85219	6.81062	6.80659	6.79858	7.61766	7.69662	7.7513	7.61859	7.66172	7.66455	6.58018	6.56744	6.25064	6.22629	6.28241	6.26953	6.43183	6.40571	6.70109	6.80526	7.68853	7.64828
ENSMUSG00000006333	Rps9	7.84846	7.81923	7.88795	7.88519	7.857	7.83612	7.74965	7.73422	7.70828	7.87827	7.92055	7.83109	7.67977	7.71835	7.5238	7.70056	7.63295	7.61532	7.63854	7.53649	7.57485	7.63018	7.65456	7.26027	7.93494	8.08938	7.99463	7.95254	7.9913	7.9339	8.81223	8.99022	9.04196	8.96974	8.98282	8.97205	7.85188	7.85943	7.73072	7.87664	7.69906	7.61911	7.5833	7.515	8.00632	7.95925	8.94814	8.97487
ENSMUSG00000006335	Tfpt	5.58616	5.48191	5.4751	5.44314	5.47043	5.37349	5.05714	4.95517	4.88865	4.97614	4.73402	4.98019	4.94473	5.05934	5.0227	5.03819	4.99227	5.10601	5.04609	4.99975	4.98393	4.93959	5.01114	4.97458	4.95416	4.82911	4.99336	4.87325	4.91494	4.92099	6.12703	6.20794	6.20276	6.20233	6.1684	6.28828	5.51439	5.42902	4.96699	4.89678	5.00204	5.01772	5.00992	4.9751	4.92555	4.90306	6.17924	6.21967
ENSMUSG00000006342	Susd2	2.97591	2.97773	2.86786	2.97186	2.89387	2.87948	3.38493	3.27923	3.28407	3.24458	3.48976	3.37587	2.93009	2.83999	2.90293	2.91617	2.91748	2.84574	3.08483	3.14882	3.09027	3.09362	3.12546	3.21894	3.74476	3.69147	3.73631	3.74419	3.69399	3.68849	3.87441	3.84102	4.03273	3.84138	3.84745	3.84082	2.9405	2.91507	3.31608	3.37007	2.88504	2.91219	3.10797	3.14601	3.72418	3.70889	3.91606	3.84322
ENSMUSG00000006356	Crip2	7.09045	7.11636	6.97903	7.17001	7.09497	7.20371	6.84591	6.69368	6.72962	6.80917	6.94776	6.97433	6.9405	6.81336	6.77717	6.9028	6.87105	6.99197	6.7044	6.5329	6.79655	6.57817	6.72668	6.68464	7.17355	7.1251	7.08639	7.10047	7.12837	7.04043	8.05757	7.87185	8.11565	8.04385	8.1422	7.87144	7.06194	7.15623	6.7564	6.91042	6.87693	6.85034	6.67795	6.66316	7.12835	7.08976	8.01502	8.01916
ENSMUSG00000006362	Cbfa2t3	5.32839	5.36379	5.18843	5.28509	5.29466	5.13179	4.43197	4.23654	4.26659	4.40485	4.19441	4.21076	5.10673	4.88818	5.04587	5.03103	5.02438	5.11407	4.85942	4.76581	4.95492	4.97903	4.9321	4.89462	5.17912	5.18791	5.07603	5.16742	5.34558	5.16437	6.1044	6.47964	6.03153	6.29279	6.34236	6.23777	5.29354	5.23718	4.3117	4.27001	4.99745	5.03376	4.86005	4.93525	5.14769	5.22579	6.20519	6.29097
ENSMUSG00000006369	Fbln1	3.09573	3.1349	3.08575	3.11109	3.08142	3.12041	2.79537	2.86144	2.80493	2.80883	2.79415	2.86791	3.27572	3.29406	3.2728	3.30775	3.30727	3.24616	3.48975	3.43705	3.47611	3.43316	3.49044	3.57225	3.40386	3.45259	3.4945	3.50133	3.60269	3.46735	4.38655	4.46564	4.51013	4.36124	4.40404	4.39313	3.10546	3.10431	2.82058	2.82363	3.28489	3.29594	3.46764	3.49862	3.45032	3.52379	4.45411	4.38614
ENSMUSG00000006373	Pgrmc1	9.44033	9.26391	9.18074	9.28253	9.31149	9.12305	8.68475	8.80341	8.54667	8.5285	8.9352	8.67771	9.1415	8.91454	8.91137	8.97519	8.9498	9.1726	9.1558	8.92809	9.31793	9.08195	9.23957	9.33535	9.24807	9.09517	9.04398	9.15241	9.20429	8.85072	9.9813	10.0767	10.0765	9.93935	9.92311	9.93391	9.29499	9.23902	8.67828	8.71381	9.02802	8.94545	9.13394	9.21896	9.12907	9.06914	10.0449	9.93212
ENSMUSG00000006378	Gcat	4.29156	4.21056	4.15058	4.22601	4.18776	4.20158	4.27798	4.18541	4.1705	4.11195	4.32768	4.29678	4.29215	4.23086	4.24183	4.26807	4.25443	4.20927	4.26045	4.19299	4.27232	4.18479	4.25885	4.20581	4.66739	4.57217	4.71703	4.63571	4.64368	4.70017	5.48538	5.48689	5.46108	5.40532	5.42877	5.44488	4.21757	4.20512	4.2113	4.24547	4.2615	4.25478	4.24192	4.21648	4.6522	4.65985	5.47778	5.42632
ENSMUSG00000006392	Med8	5.51033	5.46044	5.52781	5.40056	5.42076	5.44992	4.94683	5.12444	5.08432	5.00805	5.09025	5.02898	5.20954	5.13769	5.07582	5.1277	5.10752	5.27546	5.10675	4.98566	5.12544	4.99832	5.11086	5.07308	5.24081	5.15281	5.31462	5.30315	5.1876	5.29571	6.14674	6.22417	6.17258	6.15896	6.20579	6.25453	5.49953	5.42375	5.05186	5.04242	5.17362	5.10368	5.07261	5.06075	5.23608	5.26215	6.18117	6.20643
ENSMUSG00000006403	Adamts4	NA	NA	NA	NA	NA	NA	NA	NA	NA	NA	NA	NA	NA	NA	NA	NA	NA	NA	1.58651	1.63737	1.58425	1.57698	1.63993	1.59246	NA	NA	NA	NA	NA	NA	2.17328	2.16799	2.16395	2.10708	2.13744	2.16256	NA	NA	NA	NA	NA	NA	1.60271	1.60312	NA	NA	2.16841	2.1357
ENSMUSG00000006411	Nectin4	2.77732	2.75243	2.7321	2.83067	2.80355	2.72062	2.62481	2.61096	2.55112	2.60372	2.64724	2.61319	2.81607	2.82221	2.77883	2.79963	2.8108	2.8035	2.83473	2.82425	2.81401	2.85048	2.84524	2.82151	2.56251	2.5568	2.5506	2.49598	2.55006	2.54586	4.03601	3.99027	4.03784	4.0107	3.92115	4.06008	2.75395	2.78495	2.59563	2.62138	2.81914	2.79642	2.82433	2.83908	2.55664	2.53063	4.02137	3.99731
ENSMUSG00000006412	Pfdn2	7.24705	7.12925	7.05286	7.07263	7.13137	7.07415	6.37399	6.29206	6.23857	6.21593	6.2676	6.13403	6.56936	6.53558	6.52704	6.53528	6.39682	6.72778	6.81427	6.61616	6.71533	6.66678	6.71971	6.90931	6.80975	6.9002	6.75764	6.62497	6.70377	6.50787	7.80986	7.84076	7.82516	7.90581	7.71283	7.85333	7.14305	7.09272	6.30154	6.20585	6.55247	6.48638	6.71525	6.76527	6.82253	6.6122	7.82526	7.82399
ENSMUSG00000006418	Rnf114	4.94516	4.94284	4.93973	4.98893	4.9955	5.01823	4.74463	4.77233	4.72543	4.89617	4.79666	4.62185	4.94773	4.88131	4.72023	4.78318	4.82324	4.86663	4.54627	4.4242	4.55421	4.48821	4.52241	4.54203	4.75375	4.69169	4.65818	4.73674	4.75772	4.76215	5.81222	5.79421	5.64776	5.75733	5.69737	5.72858	4.94258	5.00089	4.74746	4.77156	4.91452	4.77555	4.50823	4.51755	4.70121	4.75221	5.7514	5.72776
ENSMUSG00000006423	C330007P06Rik	3.36862	3.34149	3.34134	3.37256	3.32887	3.39056	2.70912	2.63867	2.6316	2.59402	2.5748	2.59899	2.72254	2.76666	2.78156	2.70937	2.7939	2.75563	3.06549	2.98486	2.98481	2.9646	3.0188	3.06698	2.96629	2.91882	2.96618	2.88784	2.96536	2.90401	3.89294	3.82599	3.83978	3.82599	3.83853	3.90023	3.35048	3.364	2.6598	2.58927	2.7446	2.76161	3.01172	3.01679	2.95043	2.91907	3.8529	3.85492
ENSMUSG00000006435	Neurl1a	6.44044	6.37215	6.36093	6.34574	6.35546	6.22677	5.8199	5.83968	5.70292	5.71826	5.51288	5.68687	6.25247	6.12439	6.14768	6.18132	6.22091	6.15304	6.20962	6.08133	6.12433	6.158	6.30406	6.28962	6.40285	6.40389	6.41153	6.57113	6.53252	6.43754	7.17612	7.46252	7.37852	7.2771	7.34876	7.34276	6.39117	6.30932	5.7875	5.63934	6.18843	6.1833	6.13843	6.25056	6.40609	6.51373	7.33905	7.32287
ENSMUSG00000006442	Srm	6.78919	6.76993	6.85993	6.87434	6.91902	6.93694	6.84477	6.57927	6.65759	6.76587	6.40405	6.66353	6.49809	6.53756	6.65451	6.55475	6.66827	6.51947	6.55164	6.5442	6.35464	6.44189	6.54322	6.36696	7.04571	7.062	7.20313	7.29684	7.02719	7.12916	7.74233	7.77306	7.84856	7.83713	7.9861	7.90957	6.80635	6.9101	6.69388	6.61115	6.51782	6.62584	6.48349	6.45069	7.10361	7.15106	7.78798	7.91093
ENSMUSG00000006456	Rbm14	5.82655	5.92359	5.83193	5.94708	5.88163	5.93118	5.7216	5.70703	5.64774	5.62569	5.85361	5.60874	5.89249	5.87939	5.86487	5.93722	5.83602	5.92923	5.89559	5.96373	5.81037	5.76031	5.89132	5.81742	5.96788	6.20769	6.12107	6.16152	6.00541	6.14222	7.26006	7.21036	7.1859	7.16758	7.39092	7.08481	5.86069	5.91996	5.69213	5.69601	5.88594	5.87937	5.8899	5.82302	6.09888	6.10305	7.21877	7.21444
ENSMUSG00000006457	Actn3	1.64912	1.60145	1.59184	1.60014	1.60833	1.64848	NA	NA	NA	NA	NA	NA	NA	NA	NA	NA	NA	NA	NA	NA	NA	NA	NA	NA	1.67606	1.69358	1.63594	1.64258	1.70275	1.66422	NA	NA	NA	NA	NA	NA	1.61414	1.61898	NA	NA	NA	NA	NA	NA	1.66853	1.66985	NA	NA
ENSMUSG00000006463	Zdhhc24	NA	NA	NA	NA	NA	NA	1.84042	1.92417	1.88114	1.96064	1.85915	1.87835	NA	NA	NA	NA	NA	NA	2.10342	2.06213	2.11505	2.05711	2.11114	2.06637	2.35458	2.39995	2.35599	2.35644	2.34402	2.30345	3.37147	3.45496	3.38007	3.41028	3.47059	3.37805	NA	NA	1.88191	1.89938	NA	NA	2.09353	2.07821	2.37017	2.33464	3.40217	3.41964
ENSMUSG00000006464	Bbs1	5.23674	5.34022	5.1974	5.21947	5.27818	5.19126	4.71153	4.82087	4.76191	4.70005	4.64459	4.76103	5.25763	5.17284	5.21982	5.09629	5.19494	5.07351	5.00796	5.02738	4.99606	4.94118	5.03209	5.1024	5.10967	5.11089	5.13842	5.08373	5.12758	5.2187	6.02037	6.11642	6.19702	6.02963	6.20349	6.15964	5.25812	5.22963	4.76477	4.70189	5.21524	5.17035	5.01047	5.02522	5.11966	5.14334	6.11127	6.13092
ENSMUSG00000006471	Ndor1	NA	NA	NA	NA	NA	NA	NA	NA	NA	NA	NA	NA	NA	NA	NA	NA	NA	NA	NA	NA	NA	NA	NA	NA	2.04678	2.04922	2.01364	2.03025	2.00212	2.05772	3.33451	3.30487	3.37585	3.28389	3.31548	3.33527	NA	NA	NA	NA	NA	NA	NA	NA	2.03655	2.03003	3.33841	3.31155
ENSMUSG00000006476	Nsmf	9.23713	9.13323	9.10942	9.23925	9.23513	8.85189	8.5991	8.24119	8.34168	8.27906	8.17482	8.13845	8.80796	8.84154	8.54814	8.54819	8.57334	8.78425	8.412	8.46565	8.55591	8.68495	8.83897	8.73917	8.88084	8.90908	8.6812	9.0157	8.89535	8.63546	9.66836	9.87506	9.86114	9.87367	9.88546	10.0345	9.15993	9.10876	8.39399	8.19744	8.82475	8.55656	8.47785	8.75436	8.82371	8.84884	9.80152	9.93122
ENSMUSG00000006494	Pdk1	6.75096	6.96557	6.95662	6.91719	6.92928	6.89784	6.55137	6.6641	6.69766	6.56987	6.49894	6.70967	6.59235	6.53829	6.7024	6.62692	6.65095	6.62162	6.22191	6.4503	6.31172	6.43448	6.46631	6.38753	7.2781	7.26536	7.37733	7.17693	7.13258	7.31122	8.06285	7.82671	7.90071	8.04357	7.99259	7.89367	6.89105	6.91477	6.63771	6.59283	6.56532	6.66009	6.32798	6.42944	7.30693	7.20691	7.93009	7.97661
ENSMUSG00000006498	Ptbp1	2.53078	2.45371	2.5026	2.5105	2.50394	2.49144	2.12925	2.18712	2.18715	2.16463	2.11808	2.1392	2.72295	2.77462	2.71686	2.74588	2.75637	2.72207	2.25653	2.29146	2.24969	2.29104	2.32601	2.33457	2.72145	2.69225	2.77712	2.83823	2.78747	2.72481	3.96983	3.94602	3.9653	3.95193	3.97556	3.95243	2.4957	2.50196	2.16784	2.14064	2.74879	2.7397	2.26589	2.31721	2.73027	2.7835	3.96038	3.95998
ENSMUSG00000006517	Mvd	4.70274	4.71817	4.72486	4.71318	4.67651	4.71378	4.09086	4.0257	3.99983	4.02061	3.88947	4.0657	4.40827	4.35477	4.30096	4.31503	4.48079	4.49381	4.69832	4.5526	4.69774	4.57969	4.7198	4.63201	4.72109	4.78178	4.70706	4.63121	4.80226	4.72778	5.66989	5.77244	5.5563	5.60903	5.68084	5.68287	4.71526	4.70116	4.0388	3.99193	4.38152	4.36559	4.64955	4.64383	4.73664	4.72041	5.66621	5.65758
ENSMUSG00000006522	Itih3	NA	NA	NA	NA	NA	NA	NA	NA	NA	NA	NA	NA	NA	NA	NA	NA	NA	NA	NA	NA	NA	NA	NA	NA	NA	NA	NA	NA	NA	NA	2.82649	2.83528	2.90829	2.83982	2.87937	2.88688	NA	NA	NA	NA	NA	NA	NA	NA	NA	NA	2.85669	2.86869
ENSMUSG00000006526	Stimate	3.65895	3.6832	3.7494	3.76459	3.69184	3.71318	3.53212	3.4937	3.58816	3.67057	3.46059	3.59081	3.58322	3.58668	3.55574	3.53799	3.61576	3.58414	3.44689	3.4144	3.45312	3.36727	3.47801	3.46108	3.6907	3.70163	3.69055	3.68599	3.71999	3.71209	4.78723	4.7278	4.70195	4.6302	4.71471	4.67904	3.69718	3.7232	3.53799	3.57399	3.58495	3.56983	3.43814	3.43545	3.69429	3.70602	4.73899	4.67465
ENSMUSG00000006527	Sfmbt1	6.91221	6.86906	6.75956	6.90176	6.97547	6.80009	6.54979	6.44219	6.47381	6.33529	6.40983	6.36468	6.58415	6.4504	6.59722	6.52434	6.53471	6.40821	6.42724	6.48296	6.41556	6.47864	6.34563	6.48891	6.78201	6.77978	6.67576	6.65966	6.61234	6.85998	7.68877	7.81012	7.77072	7.89819	7.88945	7.85734	6.84694	6.89244	6.48859	6.36993	6.51727	6.55209	6.44192	6.43773	6.74585	6.71066	7.75654	7.88166
ENSMUSG00000006567	Atp7b	NA	NA	NA	NA	NA	NA	NA	NA	NA	NA	NA	NA	NA	NA	NA	NA	NA	NA	NA	NA	NA	NA	NA	NA	NA	NA	NA	NA	NA	NA	1.95744	1.96558	1.97408	2.01744	1.99096	1.96325	NA	NA	NA	NA	NA	NA	NA	NA	NA	NA	1.9657	1.99055
ENSMUSG00000006575	Rundc3a	8.23308	8.25282	8.11824	8.1078	8.2094	8.0351	7.81625	7.70182	7.76689	7.62363	7.89685	7.61065	7.96739	7.86985	7.94104	7.89199	7.77485	8.04362	7.71652	7.90878	7.75038	7.88378	8.07509	7.89842	8.16649	8.21252	8.12349	8.1307	8.06562	8.11728	9.13469	9.1351	9.23319	9.05752	9.20134	9.12315	8.20138	8.11743	7.76165	7.71038	7.91862	7.86929	7.79189	7.95243	8.1675	8.10454	9.16766	9.12734
ENSMUSG00000006576	Slc4a3	6.90801	6.87209	6.67532	6.72517	6.77612	6.93951	6.66325	6.57617	6.49859	6.66324	6.54092	6.79065	6.31198	6.20368	6.23377	6.37996	6.37002	6.38947	6.30623	6.38714	6.23438	6.27983	6.2775	6.37665	6.77262	6.64542	6.85535	6.81688	6.69124	6.72394	7.47541	7.36819	7.3562	7.14257	7.13973	7.13638	6.81848	6.8136	6.57934	6.66494	6.25783	6.32792	6.30925	6.31133	6.7578	6.74402	7.39993	7.13956
ENSMUSG00000006586	Runx1t1	7.02934	7.15444	7.10893	7.10967	7.25159	7.19703	6.92071	6.89726	6.89388	7.04985	6.78189	6.90734	6.7312	6.73427	6.80665	6.72137	6.76391	6.77048	6.84578	6.77468	6.61596	6.71266	6.62785	6.75846	7.33043	7.24194	7.31639	7.39775	7.27157	7.21683	8.0953	8.03089	7.87935	7.8755	7.74954	7.87594	7.09757	7.18609	6.90395	6.91302	6.73273	6.76397	6.74547	6.69966	7.29625	7.29538	8.00185	7.83366
ENSMUSG00000006589	Aprt	5.83714	5.71427	5.67216	5.78182	5.78225	5.70195	5.50074	5.53302	5.52502	5.59707	5.70258	5.61614	5.70086	5.66781	5.6959	5.75499	5.73122	5.59868	5.68831	5.70043	5.85619	5.83761	5.66969	5.60977	5.9991	6.18325	6.04384	6.1429	6.06129	6.10346	7.02907	7.1431	7.12251	7.50202	7.54576	7.18029	5.74119	5.75534	5.51959	5.6386	5.68433	5.72737	5.74831	5.70569	6.0754	6.10255	7.09822	7.40936
ENSMUSG00000006599	Gtf2h1	6.35035	6.48431	6.4338	6.29795	6.32843	6.40391	6.25581	6.01526	6.13857	6.29876	6.08643	6.05459	5.821	5.95848	5.99046	5.95017	5.94564	5.92064	5.75281	5.67519	5.74165	5.67832	5.77501	5.75556	6.40014	6.37767	6.40789	6.31883	6.43366	6.45179	7.29635	7.23793	7.07546	7.2422	7.14985	7.24579	6.42282	6.34343	6.13655	6.14659	5.88974	5.96209	5.72322	5.7363	6.39523	6.40143	7.20325	7.21261
ENSMUSG00000006611	Hfe	NA	NA	NA	NA	NA	NA	2.12255	2.08348	2.10203	2.14557	2.22029	2.12478	NA	NA	NA	NA	NA	NA	NA	NA	NA	NA	NA	NA	1.76696	1.80324	1.77902	1.76748	1.80126	1.76676	3.10059	3.03254	3.02326	3.0736	3.01533	3.02157	NA	NA	2.10269	2.16355	NA	NA	NA	NA	1.78307	1.7785	3.05213	3.03683
ENSMUSG00000006638	Abhd1	NA	NA	NA	NA	NA	NA	NA	NA	NA	NA	NA	NA	NA	NA	NA	NA	NA	NA	NA	NA	NA	NA	NA	NA	1.57173	1.62219	1.54743	1.58706	1.6069	1.54891	NA	NA	NA	NA	NA	NA	NA	NA	NA	NA	NA	NA	NA	NA	1.58045	1.58096	NA	NA
ENSMUSG00000006641	Slc5a6	4.04072	4.07603	3.94835	4.07465	4.06455	4.03402	4.06696	3.96679	3.97046	4.16562	4.02862	4.0753	3.64542	3.5101	3.60344	3.66146	3.53923	3.62092	3.77215	3.75034	3.74106	3.76787	3.65525	3.78565	3.94485	3.84122	3.93312	3.94832	3.99034	3.87522	4.72691	4.81246	4.85026	4.76391	4.81507	4.72738	4.0217	4.05774	4.0014	4.08985	3.57776	3.60138	3.75451	3.73626	3.90639	3.93796	4.79654	4.76878
ENSMUSG00000006651	Aplp1	11.7981	11.6234	11.5715	11.7068	11.6347	11.5946	11.3854	11.4031	11.246	11.4543	11.4797	11.4683	11.4717	11.4107	11.2975	11.3793	11.345	11.3733	11.511	11.2994	11.4808	11.3122	11.4822	11.4679	11.6682	11.4814	11.6637	11.6559	11.7102	11.4029	12.4331	12.6693	12.4702	12.443	12.4922	12.4584	11.6643	11.6453	11.3448	11.4674	11.4412	11.3406	11.4304	11.4208	11.6044	11.5897	12.5242	12.4646
ENSMUSG00000006673	Qrich1	8.74476	8.79332	8.73463	8.91166	8.86811	8.68556	8.37414	8.54973	8.50474	8.24021	8.34652	8.40505	8.59575	8.54723	8.34036	8.47452	8.4637	8.49039	8.43812	8.33669	8.36458	8.482	8.47518	8.46531	8.97609	8.96508	8.97451	9.04942	9.01026	8.86681	9.81366	9.77736	9.73954	9.79022	9.66766	9.86214	8.75757	8.82178	8.47621	8.33059	8.57149	8.42619	8.37979	8.47416	8.97189	8.9755	9.77685	9.77334
ENSMUSG00000006675	P4htm	8.41865	8.24396	8.20251	8.19114	8.18586	8.16521	7.78647	7.91787	7.65992	7.57704	7.72555	7.82951	7.89489	7.90672	7.92503	7.9895	7.90586	7.91338	8.10193	7.84339	7.95765	7.99976	7.89293	8.06956	8.26157	8.13889	8.27683	8.1282	8.27265	8.16002	8.89843	9.05049	9.05445	9.04064	9.05602	9.03221	8.28837	8.18074	7.78808	7.7107	7.90081	7.94013	7.96766	7.98742	8.22576	8.18695	9.00112	9.04296
ENSMUSG00000006676	Usp19	8.46244	8.42303	8.41583	8.50032	8.4934	8.32303	7.97417	7.99174	7.9007	7.9428	8.05788	7.88975	7.95307	8.13028	7.98888	8.04476	7.9899	8.15679	8.09766	8.13388	7.93749	8.10716	8.19251	8.25799	8.47169	8.47685	8.42987	8.46108	8.40784	8.38529	9.29474	9.29093	9.27781	9.10948	9.23024	9.22934	8.43377	8.43891	7.95554	7.96348	8.04167	8.00784	8.05634	8.18589	8.45947	8.41807	9.28783	9.18969
ENSMUSG00000006678	Pola1	4.30896	4.3012	4.21625	4.27429	4.24221	4.25828	4.00557	4.1365	4.13034	4.11696	4.20926	3.97197	4.19497	4.23197	4.24697	4.20932	4.24126	4.2824	3.9377	3.95725	3.99287	3.95778	3.95689	3.94492	4.68214	4.90253	4.86927	4.9129	4.89359	4.87929	5.45408	5.501	5.54449	5.50251	5.54189	5.46088	4.27547	4.25826	4.0908	4.09939	4.21347	4.23252	3.96261	3.9532	4.81798	4.89526	5.49986	5.50176
ENSMUSG00000006699	Cdc42	10.0145	10.145	10.1582	10.1465	10.1374	10.3594	9.89722	9.98101	10.0818	9.91662	9.956	9.97776	9.65658	9.84181	9.85793	9.7042	9.78737	9.735	9.54053	9.68127	9.47551	9.57153	9.51489	9.44923	10.3039	10.3783	10.325	10.3379	10.3716	10.4065	11.097	10.9224	10.9503	11.2979	11.1102	11.0709	10.1059	10.2144	9.98669	9.95012	9.74919	9.78317	9.56577	9.51188	10.3358	10.372	10.9899	11.1597
ENSMUSG00000006705	Pknox1	5.23606	5.27346	5.20321	5.2074	5.21666	5.17933	5.36208	5.22813	5.19285	5.35076	5.12842	5.18731	5.27593	5.1568	5.15516	5.13589	5.09535	5.07378	4.65489	4.81826	4.60289	4.67026	4.59946	4.75978	5.61348	5.55127	5.53564	5.45517	5.49284	5.66237	6.34238	6.27748	6.36994	6.4068	6.29445	6.28901	5.23758	5.20113	5.26102	5.22216	5.21637	5.1288	4.69202	4.6765	5.5668	5.53679	6.32994	6.33008
ENSMUSG00000006711	D130043K22Rik	8.34813	8.11551	8.3555	8.22498	8.16816	8.16529	8.07192	7.8721	7.80167	8.03868	7.79248	7.99715	7.82877	7.81801	7.8105	7.8569	7.84998	7.83984	7.72788	7.68997	7.6925	7.70893	7.57916	7.83628	8.4639	8.31249	8.39179	8.29383	8.3151	8.28526	9.24696	9.25973	9.16355	9.07915	9.01249	9.2033	8.27305	8.18614	7.91523	7.94277	7.82339	7.83913	7.70345	7.70812	8.3894	8.29806	9.22341	9.09831
ENSMUSG00000006715	Gmnn	3.99566	4.00988	4.06669	4.05451	4.08389	4.11258	3.50297	3.56106	3.56135	3.5377	3.61935	3.46823	3.72745	3.69844	3.67856	3.71523	3.72041	3.65946	3.25661	3.30821	3.34496	3.26787	3.25271	3.24269	4.27327	4.31046	4.24791	4.22165	4.2268	4.23681	5.12259	5.00702	4.9989	5.0809	5.01825	5.10591	4.02408	4.08366	3.54179	3.54176	3.71295	3.70473	3.30326	3.25443	4.27722	4.22842	5.04284	5.06835
ENSMUSG00000006717	Acot13	8.98835	9.07467	9.15332	9.05839	9.03864	9.17591	8.73474	8.88535	8.86781	9.06372	8.65078	8.75753	8.83352	8.82872	8.74379	8.73214	8.67519	8.79847	8.72281	8.57746	8.57499	8.54505	8.53157	8.45026	9.31964	9.476	9.3684	9.48737	9.48608	9.40696	10.3655	10.2059	10.3032	10.5886	10.3952	10.3823	9.07212	9.09098	8.8293	8.82401	8.83112	8.71704	8.62508	8.50896	9.38801	9.46014	10.2915	10.4554
ENSMUSG00000006720	Zfp184	3.27343	3.31418	3.32524	3.29928	3.30484	3.32681	3.32359	3.2614	3.31502	3.3798	3.2147	3.27329	3.09808	3.11277	3.11263	3.08257	3.1708	3.10537	2.46663	2.5283	2.52825	2.53217	2.47142	2.52501	3.95135	3.82945	3.83371	3.88153	3.91351	3.87211	4.12258	4.27415	4.13147	4.23362	4.15401	4.12803	3.30429	3.31031	3.3	3.28926	3.10542	3.122	2.50773	2.50953	3.8715	3.88905	4.17607	4.17189
ENSMUSG00000006728	Cdk4	5.71706	5.54803	5.53621	5.62692	5.55865	5.48187	5.15387	4.98291	5.0677	5.00294	5.08327	5.11445	5.56571	5.42061	5.50634	5.44218	5.49136	5.46885	5.163	5.14897	5.19451	5.11705	5.25195	5.28997	5.5604	5.67106	5.59567	5.72436	5.60835	5.5625	6.52789	6.78778	6.58135	6.66475	6.6869	6.65379	5.60043	5.55581	5.06816	5.06689	5.49316	5.47996	5.16883	5.21966	5.60904	5.63174	6.63234	6.66848
ENSMUSG00000006731	B4galnt1	7.45446	7.42167	7.25007	7.47673	7.38973	7.31076	7.23106	6.95615	6.93256	6.94436	7.16044	6.99314	7.02113	7.0671	6.98916	7.11306	6.93414	6.9114	6.99936	7.01441	7.03095	7.04149	7.23276	7.12709	7.1377	7.27229	7.20908	7.32614	7.26196	7.23196	8.07967	8.38292	8.15961	8.16629	8.27827	8.20984	7.3754	7.39241	7.03992	7.03265	7.04411	7.01212	7.01491	7.13378	7.20635	7.27335	8.2074	8.21813
ENSMUSG00000006732	Mettl1	5.16661	5.18478	5.13093	5.17491	5.07639	5.06655	4.49418	4.62371	4.63346	4.4257	4.7167	4.60921	4.98722	4.98901	4.90121	4.97679	4.9841	5.07176	4.84499	4.82918	5.01643	4.90165	4.94287	4.92872	4.77462	4.8314	4.83897	4.91883	4.95026	4.86908	5.8829	5.99954	5.90966	5.91946	5.94454	5.967	5.16077	5.10595	4.58378	4.58387	4.98811	4.95403	4.89686	4.92441	4.815	4.91272	5.9307	5.94367
ENSMUSG00000006736	Tspan31	6.23153	6.17452	6.11159	6.22511	6.14836	6.11749	5.60712	5.65786	5.58027	5.50683	5.58041	5.60911	6.01256	5.95342	5.9882	5.98579	5.90593	5.99585	5.67322	5.81639	5.79753	5.62252	5.76742	5.90818	6.18839	6.02733	6.15556	6.13709	6.01595	6.04273	7.2052	7.35845	7.28541	7.18068	7.24055	7.24495	6.17255	6.16365	5.61509	5.56545	5.98299	5.95997	5.76238	5.76604	6.12376	6.06526	7.28302	7.22206
ENSMUSG00000006740	Kif5b	9.96559	10.0139	10.0814	10.0587	10.0473	10.0002	9.56609	9.7054	9.82786	9.78959	9.75301	9.54407	9.66991	9.82513	9.87292	9.62426	9.75871	9.68732	9.40764	9.68348	9.44254	9.48422	9.62292	9.44605	10.0551	10.2997	10.0525	10.2027	10.1713	10.3198	10.9358	10.7697	10.8747	11.2692	11.0335	11.1094	10.0203	10.0354	9.69978	9.69556	9.74752	9.75196	9.51122	9.51773	10.1358	10.2313	10.8601	11.1374
ENSMUSG00000006763	Saal1	4.82751	4.78435	4.95783	4.87588	4.93619	4.83017	4.81092	4.83302	4.82706	5.05425	4.89683	4.83551	4.89929	4.79156	4.85351	4.86271	4.92837	4.79052	5.01062	4.76757	4.90997	4.86696	4.93015	4.79017	5.35525	5.24179	5.37646	5.2884	5.34223	5.30107	6.10126	6.15576	6.06378	6.07565	5.99861	6.14317	4.85657	4.88074	4.82366	4.92887	4.84543	4.88153	4.89605	4.86243	5.3245	5.31056	6.10693	6.07248
ENSMUSG00000006782	Cnp	4.61457	4.5339	4.49187	4.58652	4.43363	4.68258	4.64987	4.6467	4.60281	4.85694	4.85489	4.65018	4.18758	4.11841	4.22185	4.21335	4.19294	4.24031	4.59245	4.52124	4.60693	4.58741	4.58063	4.68851	4.81707	4.80061	4.65851	4.78095	4.74311	4.7757	5.85057	5.84035	5.98946	5.89402	5.98167	5.9453	4.54678	4.56758	4.63313	4.78734	4.15299	4.20938	4.57354	4.61885	4.75873	4.76659	5.89346	5.94033
ENSMUSG00000006784	Ttc25	2.25482	2.21689	2.22977	2.27329	2.20572	2.32862	NA	NA	NA	NA	NA	NA	NA	NA	NA	NA	NA	NA	NA	NA	NA	NA	NA	NA	2.20751	2.26293	2.23406	2.18764	2.22268	2.24323	2.9341	2.94881	2.92318	2.94355	2.94498	2.94094	2.23383	2.26921	NA	NA	NA	NA	NA	NA	2.23483	2.21785	2.93536	2.94316
ENSMUSG00000006800	Sulf2	9.16819	9.05165	9.05087	9.13606	9.0066	9.10016	8.83193	8.9035	8.823	8.70634	8.8942	8.76354	8.69503	8.72046	8.69488	8.73327	8.69238	8.8054	8.83569	8.72544	9.02424	8.85952	8.91349	8.90713	9.18017	9.27787	9.36701	9.4925	9.59258	9.25171	10.0821	10.0692	10.1725	10.0494	10.0683	10.0041	9.09024	9.08094	8.85281	8.78802	8.70774	8.70684	8.86179	8.89338	9.27502	9.44559	10.108	10.0406
ENSMUSG00000006818	Sod2	9.40271	9.38071	9.48976	9.39559	9.41423	9.52483	9.10669	9.1765	9.20468	9.11158	9.14448	9.30317	9.22569	9.1713	9.12627	9.1817	9.12975	9.16378	9.15512	9.11444	9.17499	9.12292	8.96841	9.13329	9.80753	9.75116	9.70233	9.54126	9.70499	9.68448	10.7324	10.5374	10.6935	10.5413	10.369	10.4632	9.4244	9.44488	9.16262	9.18641	9.19849	9.14591	9.14818	9.07487	9.75367	9.64358	10.6544	10.4578
ENSMUSG00000006850	Tmco6	3.29828	3.30496	3.27866	3.32637	3.37365	3.26302	2.7315	2.79655	2.7851	2.73427	2.80331	2.77991	3.38259	3.34678	3.36881	3.38374	3.35973	3.35043	2.47641	2.48936	2.48932	2.46743	2.51603	2.49063	3.67551	3.69917	3.59715	3.67479	3.6707	3.62522	4.33632	4.39529	4.3181	4.32041	4.36025	4.31388	3.29397	3.32101	2.77105	2.7725	3.36469	3.37076	2.48503	2.49136	3.65728	3.6569	4.34991	4.33151
ENSMUSG00000006906	Stambp	7.17051	7.2613	7.27072	7.27785	7.287	7.32787	7.05219	7.12438	7.16463	7.08736	7.15384	7.15027	6.87358	6.95502	6.98539	6.89794	7.02259	7.06226	6.76948	6.85309	6.86114	6.68773	6.78453	6.69741	7.67955	7.53347	7.61687	7.57661	7.68694	7.53106	8.4342	8.25856	8.16827	8.34441	8.19543	8.4414	7.23418	7.29757	7.11373	7.13049	6.9143	6.96864	6.8279	6.72323	7.60996	7.5982	8.28701	8.32708
ENSMUSG00000006920	Ezh1	8.16137	8.17072	8.16685	8.09178	8.07907	8.0767	7.7065	7.71284	7.67346	7.84756	7.61545	7.66652	7.80863	7.77949	7.87108	7.79594	7.83874	7.89433	7.63576	7.75091	7.75626	7.77946	7.90263	7.69445	8.12722	8.19237	8.13598	8.16554	8.0509	8.11638	9.06551	8.97979	9.06425	8.969	8.87568	8.98314	8.16631	8.08252	7.6976	7.70984	7.79406	7.83525	7.71431	7.79218	8.15186	8.11094	9.03652	8.9426
ENSMUSG00000006930	Hap1	7.81974	7.994	7.89027	7.9488	8.00514	7.75851	7.53521	7.81007	7.55942	7.36653	7.92883	7.62237	7.73345	7.77918	7.74835	7.73266	7.90072	7.83334	7.86825	7.95856	8.04215	7.98735	8.28533	8.13646	8.08842	8.29972	8.41186	8.26027	8.20385	8.06958	8.85786	8.94566	9.12281	8.89206	8.77987	8.78791	7.90134	7.90415	7.6349	7.63924	7.75632	7.79391	7.95632	8.13638	8.26667	8.1779	8.97544	8.81995
ENSMUSG00000006931	P3h4	2.29794	2.30711	2.245	2.25651	2.29062	2.30371	2.61445	2.67074	2.63505	2.68157	2.81652	2.72226	NA	NA	NA	NA	NA	NA	NA	NA	NA	NA	NA	NA	2.62706	2.5851	2.6646	2.65386	2.60954	2.63149	3.20776	3.20431	3.23512	3.21482	3.24422	3.2514	2.28335	2.28361	2.64008	2.74012	NA	NA	NA	NA	2.62559	2.63163	3.21573	3.23681
ENSMUSG00000006932	Ctnnb1	10.7429	10.9045	10.7855	10.8595	10.8253	10.7915	10.4709	10.5639	10.5002	10.6947	10.3812	10.6316	10.5018	10.5149	10.5419	10.5459	10.5722	10.58	10.4949	10.5117	10.5324	10.5642	10.6223	10.5449	10.8022	11.155	11.0977	11.0217	11.0073	10.9998	11.9083	12.1044	12.0079	12.0487	12.2769	12.1063	10.8109	10.8255	10.5116	10.5692	10.5083	10.5533	10.513	10.5772	11.0183	11.0096	12.0069	12.144
ENSMUSG00000006941	Eif1b	8.33015	8.26278	8.16251	8.13562	8.19166	8.33331	8.02182	7.93905	7.94906	7.9596	8.05626	7.93504	7.9795	7.87349	8.01829	8.06016	8.06796	8.02297	8.00348	7.94694	7.92509	7.91558	7.74824	8.02896	8.23767	8.26012	8.28654	8.20268	8.33989	8.34565	9.14039	9.17616	9.20751	9.19494	9.32108	9.17056	8.25181	8.2202	7.96998	7.98363	7.9265	8.0488	7.9585	7.89759	8.26144	8.29607	9.17468	9.22886
ENSMUSG00000006958	Chrd	5.23488	5.24102	5.1663	5.14619	5.11423	5.05604	4.66009	4.66619	4.69698	4.61273	4.80681	4.67842	4.94715	4.88955	4.8646	4.92861	4.87593	4.94975	4.83389	4.80015	4.84033	4.77394	4.86871	4.81691	5.09062	5.03583	5.06041	5.02921	5.15731	5.02946	5.80047	6.00446	5.96429	5.77303	5.84387	5.85898	5.21407	5.10549	4.67442	4.69932	4.91835	4.88972	4.82479	4.81985	5.06229	5.072	5.92307	5.82529
ENSMUSG00000006998	Psmd2	8.70311	8.73696	8.62943	8.75402	8.73079	8.63512	8.1728	8.24843	8.2461	8.1248	8.35762	8.23193	8.42822	8.37196	8.38434	8.38207	8.42653	8.53455	8.314	8.41003	8.33007	8.43337	8.55563	8.4932	8.59416	8.70985	8.53328	8.55246	8.37931	8.53117	9.37538	9.55739	9.57805	9.4858	9.53467	9.56693	8.68983	8.70664	8.22244	8.23811	8.40009	8.39765	8.35137	8.49407	8.61243	8.48765	9.50361	9.52913
ENSMUSG00000007021	Syngr3	7.983	7.74092	7.76523	7.85513	7.81145	7.60398	7.56529	7.5933	7.44714	7.49262	7.42165	7.72629	7.42443	7.43856	7.3351	7.47918	7.30374	7.37951	7.44127	7.46167	7.34697	7.53343	7.47663	7.52406	7.71459	7.70019	7.82433	7.77177	7.77079	7.69106	8.56394	8.86966	8.69466	8.48486	8.68755	8.60144	7.82972	7.75686	7.53524	7.54686	7.4315	7.37267	7.41664	7.51137	7.74637	7.74454	8.70942	8.59128
ENSMUSG00000007029	Vars	6.76976	6.69563	6.5069	6.73183	6.55932	6.59266	6.35823	6.21437	6.13602	6.2409	6.19957	6.29818	6.74194	6.40229	6.39038	6.48505	6.51488	6.41523	6.53547	6.33684	6.57556	6.48892	6.54065	6.54538	6.5981	6.67731	6.66955	6.48867	6.67028	6.57336	7.59005	7.66186	7.62442	7.57168	7.76724	7.59676	6.65743	6.62794	6.23621	6.24622	6.57212	6.46344	6.48262	6.52498	6.64832	6.57744	7.62545	7.64523
ENSMUSG00000007036	Abhd16a	7.3173	7.12048	7.23011	7.25439	7.32936	7.24157	7.07505	7.08677	7.08078	6.89868	6.92422	7.25398	7.12808	7.01475	6.97241	7.10425	7.09294	6.96915	7.19236	7.08412	7.15965	7.16676	7.1752	7.07341	7.31054	7.29544	7.38482	7.47152	7.37498	7.30974	8.15727	8.21979	8.28381	8.1585	8.19825	8.21519	7.22263	7.2751	7.08086	7.02562	7.07141	7.05654	7.14537	7.13846	7.33027	7.38542	8.22029	8.19065
ENSMUSG00000007038	Neu1	6.65936	6.52488	6.33684	6.64408	6.45389	6.42735	6.30723	6.24197	6.18109	6.29058	6.40484	6.31187	6.5841	6.47107	6.33021	6.40798	6.43707	6.40478	6.73798	6.42026	6.60084	6.66341	6.60873	6.5343	6.46239	6.55664	6.60484	6.49353	6.61122	6.50088	7.52375	7.65089	7.60979	7.54312	7.57911	7.60928	6.50703	6.50844	6.24343	6.33576	6.52759	6.39175	6.58636	6.60215	6.54129	6.53521	7.59481	7.57717
ENSMUSG00000007039	Ddah2	NA	NA	NA	NA	NA	NA	NA	NA	NA	NA	NA	NA	NA	NA	NA	NA	NA	NA	NA	NA	NA	NA	NA	NA	NA	NA	NA	NA	NA	NA	2.20441	2.22315	2.26212	2.29002	2.24836	2.23129	NA	NA	NA	NA	NA	NA	NA	NA	NA	NA	2.22989	2.25656
ENSMUSG00000007050	Lsm2	5.10471	5.16231	5.20224	5.10244	5.12314	5.15407	4.89284	4.86606	4.83743	4.72006	4.71145	4.83195	4.87313	4.91285	4.8995	4.9335	4.88122	4.89412	4.92399	4.93898	4.93877	4.89686	4.89433	4.90297	5.399	5.23745	5.29795	5.29734	5.28711	5.27618	6.30827	6.35298	6.36507	6.33473	6.24343	6.33375	5.15642	5.12655	4.86544	4.75448	4.89299	4.90474	4.93391	4.89805	5.31147	5.28688	6.34211	6.30397
ENSMUSG00000007080	Pole	2.98572	3.0042	2.93064	2.95341	3.01819	2.96286	1.89844	1.93891	1.90529	1.93184	1.88425	1.93216	NA	NA	NA	NA	NA	NA	2.49466	2.48785	2.46715	2.47891	2.48811	2.43802	2.63465	2.69007	2.62365	2.66411	2.63448	2.68157	3.55384	3.52251	3.5797	3.61619	3.62025	3.66745	2.97352	2.97815	1.91421	1.91608	NA	NA	2.48322	2.46835	2.64946	2.66005	3.55201	3.63463
ENSMUSG00000007097	Atp1a2	5.99767	6.02984	6.03248	6.02997	5.9744	6.13472	6.21608	6.15813	6.10299	7.45425	6.13866	6.22334	5.89719	5.71383	5.7478	5.79637	5.73341	5.73621	5.81528	5.72223	5.81992	5.74249	5.81796	5.80429	6.39268	6.52342	6.41711	6.34464	6.36345	6.32164	7.77164	7.52761	8.33277	7.82853	8.37517	8.54239	6.02	6.04636	6.15907	6.60542	5.80551	5.75919	5.78581	5.78825	6.4444	6.34324	7.87734	8.2487
ENSMUSG00000007207	Stx1a	8.56715	8.50841	8.37389	8.35434	8.51977	8.6326	8.24271	8.06047	7.95825	8.01041	7.90812	8.23315	8.26122	8.08538	8.0726	8.1533	8.18708	8.29913	8.4868	8.1254	8.16911	8.10345	8.11568	8.37257	8.4731	8.46392	8.43475	8.27308	8.26764	8.38981	9.2137	9.10384	9.12974	8.91242	9.0652	8.87299	8.48315	8.50224	8.08714	8.05056	8.1733	8.13766	8.26044	8.19723	8.45726	8.31018	9.14909	8.9502
ENSMUSG00000007216	Zfp775	2.64313	2.60863	2.62847	2.66239	2.63486	2.59607	1.87665	1.95469	1.94178	1.89184	1.98735	1.92318	2.21211	2.20287	2.17961	2.25893	2.23753	2.19742	2.31963	2.41691	2.36826	2.36806	2.35548	2.40245	2.39849	2.40421	2.38544	2.34399	2.36276	2.33463	3.57865	3.57068	3.58108	3.54105	3.58489	3.65106	2.62674	2.63111	1.92438	1.93413	2.20749	2.22536	2.36827	2.37533	2.39605	2.34713	3.5768	3.59233
ENSMUSG00000007279	Scube2	2.04195	2.09382	2.08703	2.02134	2.09515	2.09075	NA	NA	NA	NA	NA	NA	NA	NA	NA	NA	NA	NA	1.64767	1.65014	1.74913	1.65363	1.6661	1.71449	2.14285	2.17725	2.19922	2.18732	2.18758	2.17692	3.43726	3.44339	3.4485	3.3982	3.39911	3.40768	2.07427	2.06908	NA	NA	NA	NA	1.68232	1.67807	2.17311	2.18394	3.44305	3.40167
ENSMUSG00000007338	Mrpl49	6.13388	6.21452	6.43006	6.31123	6.3021	6.3926	6.01796	6.03486	5.95434	6.03967	5.98473	5.98845	5.86063	5.91619	5.89821	5.87917	5.87129	5.84251	5.86184	5.82904	6.03578	5.82718	5.87538	5.75645	6.49184	6.44349	6.58413	6.57775	6.46903	6.47112	7.25443	7.27961	7.22157	7.18058	7.02499	7.17618	6.25949	6.33531	6.00239	6.00428	5.88841	5.88289	5.90889	5.81967	6.50649	6.50597	7.25187	7.12725
ENSMUSG00000007411	Mark3	8.19586	8.30386	8.23432	8.26199	8.29989	8.31284	8.08678	8.09753	8.18378	8.14626	8.413	7.97104	7.96059	7.96407	7.98232	7.79941	8.03184	8.06827	7.68912	7.82073	7.72781	7.75302	7.79181	7.79146	8.25599	8.21581	8.20385	8.18397	8.25539	8.27791	9.08967	9.10633	9.02906	9.14985	9.04224	9.18878	8.24468	8.29158	8.1227	8.17677	7.96233	7.93786	7.74589	7.77877	8.22522	8.23909	9.07502	9.12696
ENSMUSG00000007415	Gatad1	6.7611	6.82088	6.94415	6.76364	6.85224	6.86147	6.43134	6.61974	6.70956	6.70163	6.5916	6.64066	6.48973	6.38717	6.3842	6.39794	6.35698	6.52513	6.34256	6.33672	6.41053	6.29497	6.37327	6.42855	6.89616	6.66249	6.8003	6.79433	6.75796	6.75302	7.48888	7.519	7.35345	7.26441	7.38328	7.45879	6.84205	6.82578	6.58688	6.64463	6.43845	6.3797	6.36327	6.3656	6.78632	6.76844	7.45378	7.36883
ENSMUSG00000007440	Pcdha11	5.60102	5.76243	5.78927	5.65316	5.55861	5.67977	5.61341	5.50361	5.59025	5.67563	5.57553	5.54674	5.22199	5.42899	5.36953	5.31471	5.45853	5.40716	5.43847	5.58869	5.51121	5.37026	5.42383	5.40236	6.36995	6.29679	6.17251	6.57757	6.2459	6.23864	6.66114	6.79146	6.61859	6.54816	6.81331	6.53839	5.71758	5.63051	5.56909	5.5993	5.32549	5.38092	5.51279	5.39882	6.27975	6.35404	6.6904	6.63329
ENSMUSG00000007458	M6pr	7.71392	7.62498	7.68392	7.66533	7.62966	7.76397	7.52686	7.46776	7.46848	7.59469	7.6726	7.4825	7.53068	7.40594	7.38035	7.41712	7.41139	7.37804	7.5066	7.37433	7.59434	7.30112	7.35984	7.30792	7.96883	7.5266	7.65536	7.62388	7.78786	7.63245	8.70814	8.66842	8.70426	8.57358	8.48313	8.6098	7.67427	7.68632	7.4877	7.58326	7.46831	7.40296	7.49176	7.32296	7.71693	7.6814	8.69361	8.5555
ENSMUSG00000007564	Ppp2r1a	11.0942	11.1037	11.031	11.0816	11.0847	10.933	10.8118	10.7553	10.6495	10.8187	10.7055	10.8336	10.8077	10.7982	10.7421	10.763	10.7143	10.8415	10.7917	10.7377	10.7628	10.8736	10.8708	10.8007	11.1181	11.2771	11.2428	11.1371	11.1567	11.1439	12.0639	12.3108	12.1742	12.0728	12.186	12.0925	11.0763	11.0331	10.7389	10.786	10.8029	10.7398	10.764	10.8484	11.2127	11.1459	12.183	12.1171
ENSMUSG00000007570	Fance	2.14114	2.14421	2.148	2.15099	2.10819	2.11152	1.95887	1.87098	1.86138	1.85233	1.85635	1.91832	NA	NA	NA	NA	NA	NA	2.63159	2.58229	2.61326	2.61502	2.62549	2.64506	2.10847	2.08963	2.07834	2.06866	2.09998	2.08518	3.54937	3.54664	3.52194	3.55398	3.55901	3.51947	2.14445	2.12357	1.89708	1.87567	NA	NA	2.60905	2.62852	2.09214	2.08461	3.53932	3.54416
ENSMUSG00000007589	Tinf2	4.16905	4.18218	4.26634	4.23259	4.17202	4.23308	3.61022	3.653	3.69344	3.71111	3.66039	3.72955	3.84031	3.8502	3.82253	3.81442	3.81301	3.87441	3.34212	3.28606	3.3159	3.38819	3.32538	3.37959	3.84422	3.81711	3.89006	3.85628	3.83894	3.8709	4.61527	4.6496	4.59276	4.61505	4.61306	4.70538	4.20585	4.21256	3.65222	3.70035	3.84525	3.81665	3.31469	3.36439	3.85047	3.85537	4.61921	4.6445
ENSMUSG00000007594	Hapln4	7.62876	7.57433	7.38876	7.50908	7.49671	7.32879	7.14938	7.13572	6.88719	6.74304	7.01762	7.19445	7.51904	7.36395	7.21287	7.34225	7.13711	7.35698	7.61806	7.27969	7.49412	7.44187	7.42642	7.39802	7.50702	7.47369	7.67529	7.56688	7.6124	7.42922	8.55062	8.71095	8.73497	8.4593	8.70874	8.51259	7.53061	7.44486	7.05743	6.98503	7.44149	7.23074	7.46396	7.4221	7.552	7.53617	8.66551	8.56021
ENSMUSG00000007603	Dus3l	6.34582	6.32674	6.30252	6.4473	6.43703	6.26971	5.91894	6.09325	5.92482	5.89746	5.92736	5.96675	6.11454	6.18677	6.10643	6.08486	6.12335	5.94054	6.20237	6.13006	6.19368	6.20414	6.24912	6.12448	6.45145	6.59008	6.52964	6.45215	6.47808	6.4523	7.2148	7.28294	7.35977	7.22524	7.34979	7.17974	6.32503	6.38468	5.979	5.93053	6.15066	6.10488	6.17537	6.19258	6.52372	6.46084	7.28584	7.25159
ENSMUSG00000007610	Gtpbp3	4.38366	4.41546	4.30754	4.40343	4.37243	4.22646	4.04027	3.95813	3.88233	3.85958	3.79962	3.96239	3.84233	3.88671	3.89979	3.89894	3.84289	3.8417	4.31455	4.24199	4.24186	4.27623	4.31445	4.26585	4.03458	4.08954	4.07892	4.04053	4.16342	4.10092	5.00156	5.0785	4.97554	4.93352	4.94771	4.92713	4.36889	4.33411	3.96024	3.87386	3.86452	3.88054	4.26613	4.28551	4.06768	4.10162	5.01853	4.93612
ENSMUSG00000007613	Tgfbr1	4.1389	4.12522	4.26452	4.19515	4.20309	4.12656	3.42045	3.48833	3.45214	3.37557	3.44706	3.50626	3.55647	3.58801	3.63505	3.63332	3.6458	3.6059	4.11198	3.93826	4.16534	4.03611	4.03718	3.99224	4.73118	4.69346	4.78588	4.66065	4.80069	4.62226	5.17432	5.43982	5.2278	5.20242	5.2185	5.24422	4.17621	4.17493	3.45364	3.44296	3.57224	3.63806	4.07186	4.02184	4.73684	4.69454	5.28065	5.22171
ENSMUSG00000007617	Homer1	8.8873	8.85814	8.63312	8.65509	8.82379	8.75393	8.93474	8.51551	8.73344	8.99716	8.58636	8.4793	8.31262	8.45631	8.38541	8.37746	8.43098	8.46819	8.02782	8.10108	8.12266	8.15004	8.18392	8.26319	8.93294	8.91161	8.7229	8.93129	8.95262	9.02084	9.71331	9.64966	9.50186	9.75693	9.66735	9.64274	8.79286	8.74427	8.7279	8.6876	8.38447	8.39795	8.08385	8.19905	8.85582	8.96825	9.62161	9.68901
ENSMUSG00000007646	Rad51c	4.05594	4.10801	4.15498	4.16697	4.12125	4.19956	4.05067	3.93471	3.93721	4.11877	3.89882	4.03911	3.26578	3.36283	3.30148	3.39315	3.38351	3.30439	3.28888	3.33537	3.2475	3.28541	3.31749	3.31285	4.08153	4.11708	4.10437	4.04248	4.11269	4.15435	5.24416	5.20651	5.24351	5.38322	5.37867	5.34481	4.10631	4.16259	3.9742	4.0189	3.31431	3.35938	3.29059	3.30525	4.10099	4.10318	5.23139	5.3689
ENSMUSG00000007653	Gabrb2	10.6816	10.6862	10.8206	10.7799	10.7889	10.8563	10.5266	10.5114	10.6287	10.6635	10.5213	10.7712	10.3508	10.36	10.2335	10.3031	10.231	10.2609	10.2609	10.2267	10.304	10.2469	10.0276	10.0646	11.1464	10.8827	10.9884	10.8616	10.7953	10.8866	11.8114	11.5878	11.6808	11.6368	11.3693	11.571	10.7295	10.8084	10.5556	10.652	10.3554	10.2559	10.2638	10.113	11.0058	10.8478	11.6933	11.5257
ENSMUSG00000007656	Arpp19	8.10402	8.02646	8.12037	8.15883	8.10081	8.2874	7.94427	7.96655	7.96776	7.8933	7.96934	8.19433	7.77734	7.73148	7.99699	7.86514	7.97592	7.93262	7.84043	7.92132	7.6843	7.84525	7.65685	7.82471	8.26331	8.09498	7.81981	7.77908	7.82098	8.04889	8.82012	8.63052	8.88011	8.85948	8.81902	8.72058	8.08362	8.18234	7.95952	8.01899	7.75441	7.94602	7.81535	7.77561	8.05937	7.88298	8.77692	8.79969
ENSMUSG00000007659	Bcl2l1	6.88213	6.76986	6.72988	6.7797	6.73462	6.64283	6.14746	6.00005	5.95588	5.8785	5.74694	5.99517	6.47171	6.31747	6.49577	6.34674	6.54426	6.45511	6.51662	6.38127	6.62453	6.49201	6.57216	6.6426	6.39602	6.4219	6.43734	6.44667	6.44493	6.28942	7.16721	7.39799	7.48563	7.2823	7.41293	7.33439	6.79396	6.71905	6.03446	5.87354	6.39459	6.46226	6.50747	6.56892	6.41842	6.39367	7.35028	7.34321
ENSMUSG00000007670	Khsrp	8.43621	8.33481	8.29288	8.26028	8.23224	8.11745	8.33414	7.98848	7.83494	8.09119	8.04793	7.96734	7.76483	7.96865	7.88012	7.81906	7.8998	7.80882	7.82035	7.72697	7.79853	7.72202	7.96183	7.96803	8.18838	8.1178	8.21343	8.12792	8.17626	8.01536	9.03791	9.14215	8.93257	9.19297	9.14358	9.10559	8.35464	8.20332	8.05252	8.03549	7.86674	7.86633	7.78195	7.88396	8.1732	8.10651	9.03754	9.14738
ENSMUSG00000007721	Ccdc124	7.10905	6.93558	6.8669	6.87861	6.87252	6.79066	6.41718	6.58002	6.32222	6.35546	6.67555	6.56717	6.86331	6.48935	6.41685	6.62824	6.42561	6.61727	6.81118	6.79388	6.96755	6.78687	6.91518	6.93824	6.78933	6.6856	6.83514	6.75713	6.8251	6.50897	7.59591	7.68575	7.65727	7.527	7.51961	7.62957	6.97051	6.84726	6.43981	6.53273	6.67633	6.49024	6.85754	6.8801	6.77002	6.69707	7.64631	7.55873
ENSMUSG00000007739	Cct4	9.32125	9.61074	9.66182	9.63673	9.5734	9.77847	9.46076	9.46409	9.6196	9.80237	9.71014	9.47727	9.24189	9.36163	9.39692	9.42405	9.43707	9.27918	9.19482	9.32127	9.19556	9.204	9.17913	8.99135	9.82355	10.0219	9.92056	9.86547	9.92999	10.0593	10.7859	10.6555	10.7297	10.7442	10.7294	10.6392	9.53127	9.66287	9.51482	9.66326	9.30176	9.41935	9.23722	9.12483	9.92202	9.95158	10.7237	10.7043
ENSMUSG00000007777	0610009B22Rik	6.0021	6.08719	6.06301	6.05213	6.16742	6.07029	5.70358	5.82124	5.8287	5.93076	5.83616	5.71666	5.88998	5.71849	5.81792	5.8004	5.85386	5.81749	5.88261	5.84123	5.79048	5.82582	5.71265	5.74412	6.32806	6.52161	6.23857	6.36424	6.40426	6.42897	7.22932	7.15777	7.15664	7.24125	7.17903	7.13466	6.05077	6.09661	5.78451	5.82786	5.80424	5.82406	5.83811	5.76086	6.36274	6.39915	7.18124	7.18498
ENSMUSG00000007783	Cpt1c	8.60758	8.52016	8.43378	8.53016	8.54128	8.37742	8.14564	8.0917	7.99255	8.01337	7.98014	8.11396	7.95217	8.18948	8.00972	8.07556	8.02952	8.06603	8.07119	7.95374	8.13169	8.07452	8.09628	8.10973	8.44653	8.36776	8.55408	8.50286	8.53789	8.35655	9.33279	9.55371	9.26428	9.30042	9.23033	9.35272	8.52051	8.48296	8.07663	8.03582	8.07082	8.03827	8.05221	8.09351	8.45612	8.46577	9.38359	9.29449
ENSMUSG00000007805	Twist2	NA	NA	NA	NA	NA	NA	NA	NA	NA	NA	NA	NA	NA	NA	NA	NA	NA	NA	NA	NA	NA	NA	NA	NA	NA	NA	NA	NA	NA	NA	2	1.95037	1.97965	1.94837	1.96153	1.93768	NA	NA	NA	NA	NA	NA	NA	NA	NA	NA	1.97667	1.94919
ENSMUSG00000007812	Zfp655	7.62818	7.62965	7.73259	7.64895	7.57751	7.92152	7.49207	7.52238	7.70044	7.71456	7.50835	7.66273	7.30395	7.39675	7.49671	7.25981	7.40258	7.41864	6.91769	7.1819	7.02498	6.96621	6.97663	6.98904	7.73465	7.6443	7.69783	7.52864	7.79347	7.94111	8.47688	8.46257	8.46806	8.56518	8.59006	8.49631	7.66347	7.71599	7.57163	7.62855	7.35035	7.38636	7.04152	6.97729	7.69226	7.75441	8.46917	8.55052
ENSMUSG00000007815	Rhoa	7.05297	6.89345	6.86452	6.93867	6.9565	6.80586	6.54257	6.51735	6.58885	6.67378	6.4889	6.62377	6.78855	6.70632	6.6642	6.6365	6.56078	6.73555	6.67911	6.63851	6.72642	6.73019	6.73871	6.94529	6.96379	6.93372	6.98433	7.12037	7.09378	6.92297	7.95077	8.03176	8.03893	7.95911	8.23391	7.98755	6.93698	6.90034	6.54959	6.59548	6.74743	6.62049	6.68135	6.80473	6.96061	7.04571	8.00715	8.06019
ENSMUSG00000007817	Zmiz1	8.0295	7.94342	8.01434	8.04835	7.97445	7.86477	7.64325	7.37545	7.37191	7.80518	7.4964	7.48447	7.4896	7.68253	7.64418	7.85735	7.68407	7.5688	7.61409	7.71908	7.65425	7.71096	7.68568	7.87641	8.04112	8.08311	8.02817	8.05209	8.03403	7.99392	9.10501	9.17795	9.1144	9.30372	9.32197	9.30596	7.99575	7.96252	7.46354	7.59535	7.58607	7.72854	7.66247	7.75768	8.0508	8.02668	9.13245	9.31055
ENSMUSG00000007827	Ankrd26	5.76559	5.83005	5.68895	5.73416	5.81272	5.8788	6.10753	5.84026	5.86725	6.02771	6.09556	5.83237	5.70229	5.52301	5.69749	5.63292	5.66896	5.59339	5.32892	5.57423	5.31808	5.37668	5.49067	5.42471	6.16769	6.24256	6.12276	6.08522	6.09138	6.25802	7.10096	6.85049	7.0263	7.12302	6.88335	6.95966	5.76153	5.80856	5.93835	5.98521	5.61265	5.66646	5.40708	5.43068	6.17767	6.14487	6.99258	6.98867
ENSMUSG00000007833	Aldh16a1	2.44251	2.51352	2.53995	2.4996	2.47721	2.44986	1.96475	1.90652	1.9742	1.88856	1.89255	1.91068	2.12556	2.11015	2.12063	2.13374	2.08722	2.08594	2.40223	2.42046	2.41026	2.43172	2.42429	2.47	2.14714	2.08625	2.16123	2.13785	2.1496	2.0842	3.72547	3.82042	3.84927	3.81175	3.84922	3.82742	2.49866	2.47556	1.94849	1.89726	2.11785	2.11386	2.41098	2.442	2.13154	2.12388	3.79839	3.82946
ENSMUSG00000007836	Hnrnpa0	7.85083	7.6884	7.49045	7.8033	7.75055	7.54116	7.44864	7.37481	7.31844	7.33948	7.40014	7.39166	7.70212	7.61876	7.4459	7.68964	7.45422	7.45533	7.57212	7.65449	7.6035	7.59809	7.88547	7.5847	7.61224	7.77831	8.03481	7.8777	7.86688	7.76224	8.55313	8.66992	8.76186	8.65932	8.85308	8.72138	7.67656	7.69834	7.38063	7.37709	7.66044	7.52992	7.61004	7.68942	7.80845	7.8356	8.66164	8.74459
ENSMUSG00000007837	Prrg2	2.18003	2.12629	2.10113	2.1713	2.13434	2.10463	2.17257	2.20303	2.1875	2.23234	2.30634	2.23592	NA	NA	NA	NA	NA	NA	NA	NA	NA	NA	NA	NA	NA	NA	NA	NA	NA	NA	2.5462	2.56818	2.52499	2.50032	2.50493	2.5036	2.13582	2.13676	2.1877	2.2582	NA	NA	NA	NA	NA	NA	2.54646	2.50295
ENSMUSG00000007850	Hnrnph1	9.61579	9.65731	9.90451	9.68122	9.71155	9.81232	9.58182	9.53442	9.6521	9.68932	9.60653	9.61158	9.45158	9.45546	9.54746	9.47399	9.39862	9.46336	9.36345	9.37946	9.44168	9.30817	9.42501	9.18423	10.2152	10.2602	10.0873	10.1666	10.1615	10.1925	11.012	10.8329	10.8541	10.9734	10.7655	10.7909	9.72587	9.73503	9.58945	9.63581	9.45352	9.47336	9.39486	9.30581	10.1876	10.1735	10.8997	10.8433
ENSMUSG00000007867	Ift43	4.0837	4.10969	4.17681	4.13527	4.10056	4.15244	3.63822	3.6503	3.59502	3.60101	3.57034	3.60415	3.72984	3.64627	3.7048	3.67448	3.80173	3.74929	3.45421	3.48303	3.50993	3.4564	3.3751	3.48123	3.88686	3.89379	3.9014	3.92259	3.94986	3.90244	4.94527	4.91937	4.95498	5.03902	4.8865	4.85553	4.1234	4.12943	3.62785	3.59183	3.68805	3.727	3.48239	3.43758	3.89402	3.92496	4.93987	4.92702
ENSMUSG00000007880	Arid1a	8.85538	8.83018	8.76902	8.833	8.76992	8.73444	8.54271	8.36662	8.55838	8.49418	8.47961	8.50269	8.47086	8.46208	8.48644	8.4927	8.58146	8.45843	8.31132	8.28586	8.20814	8.34788	8.42808	8.49483	8.91801	9.08521	9.14582	9.20058	8.9326	9.10306	9.75667	9.70301	9.72606	9.7681	9.99234	9.6733	8.81819	8.77912	8.48924	8.49216	8.46647	8.5202	8.26844	8.4236	9.04968	9.07875	9.72858	9.81125
ENSMUSG00000007888	Crlf1	5.49387	5.39403	5.35785	5.33447	5.38255	5.2845	5.63205	5.637	5.61278	5.54377	5.83204	5.58356	5.28779	5.36754	5.30616	5.36805	5.30766	5.3837	5.8313	5.76169	5.88039	5.78627	5.80198	5.71035	5.91444	6.06604	6.03023	6.08695	6.14524	5.99717	6.95566	6.99563	6.94646	7.0035	6.89949	6.95571	5.41525	5.33384	5.62728	5.65312	5.32766	5.32729	5.82446	5.7662	6.00357	6.07645	6.96592	6.9529
ENSMUSG00000007891	Ctsd	7.4384	7.30677	7.06278	7.23977	7.19517	7.20828	6.90951	6.96578	6.7833	6.98072	7.02844	6.96621	6.80729	6.68362	6.89019	6.8498	6.74596	6.82266	7.18349	7.12051	7.19307	7.06501	6.99775	7.19822	7.41355	7.64539	7.41412	7.40199	7.4939	7.37276	8.25128	8.54743	8.37379	8.48952	8.30836	8.40453	7.26932	7.2144	6.8862	6.99179	6.74546	6.82865	7.16569	7.08699	7.49102	7.42289	8.39083	8.40081
ENSMUSG00000007892	Rplp1	5.1679	5.15519	5.08256	5.14604	5.20095	4.98803	5.06907	5.05095	4.90903	5.08368	4.93895	4.86174	5.52665	5.36119	5.39582	5.40766	5.32628	5.50577	5.45208	5.35628	5.50693	5.57124	5.46305	5.40471	4.80616	4.90428	4.81115	4.74587	4.8001	4.72021	5.88175	6.03553	5.95299	5.91556	5.83906	5.7937	5.13521	5.11167	5.00968	4.96146	5.44392	5.37659	5.43843	5.47967	4.84053	4.75539	5.95676	5.84944
ENSMUSG00000007908	Hmgcll1	5.24491	5.23805	5.34349	5.22218	5.26878	5.27975	4.88872	4.72827	4.63783	4.5885	4.57437	4.6884	4.78437	4.8548	4.80585	4.78446	4.83626	4.90467	4.50976	4.56562	4.61531	4.62727	4.6324	4.50847	5.1978	5.20068	5.14335	5.21714	5.29804	5.157	5.74642	5.8174	5.72363	5.73154	5.68288	5.79144	5.27548	5.25691	4.75161	4.61709	4.81958	4.80885	4.56356	4.58938	5.18061	5.22406	5.76248	5.73528
ENSMUSG00000007944	Ttc9b	6.12961	5.96482	5.91498	5.88077	6.0418	5.96743	5.63374	5.53517	5.43546	5.53701	5.24529	5.4794	5.60899	5.52366	5.4803	5.59188	5.56497	5.52763	5.89384	5.58982	5.74546	5.82171	5.63585	5.89211	5.72495	5.71561	5.7036	5.57578	5.54556	5.59302	6.40384	6.36317	6.43119	6.46601	6.28675	6.24904	6.00314	5.96334	5.53479	5.42057	5.56633	5.54572	5.74304	5.78322	5.71472	5.57145	6.3994	6.33394
ENSMUSG00000007950	Abhd8	7.70369	7.61136	7.45632	7.62603	7.70114	7.44377	7.18693	6.92374	6.92111	7.0764	6.76933	6.96602	7.59493	7.52788	7.35722	7.54085	7.46785	7.62765	7.38688	7.21601	7.44617	7.43131	7.5258	7.43126	7.65544	7.61847	7.54427	7.60929	7.62606	7.40582	8.48711	8.41229	8.51826	8.31225	8.16816	8.31897	7.59046	7.59031	7.01059	6.93725	7.5614	7.45531	7.34968	7.46279	7.60606	7.54706	8.47255	8.26646
ENSMUSG00000007987	Ift22	7.16195	7.18209	7.17876	7.20273	7.32034	7.40238	6.87584	7.00196	7.1623	7.05702	7.19419	7.12539	6.86795	6.74612	6.76353	6.68478	6.75188	6.75474	6.70012	6.80147	6.85158	6.57809	6.61388	6.65897	7.54796	7.33141	7.40382	7.46433	7.41489	7.41936	8.26417	8.19969	8.18537	8.1247	8.00178	8.16274	7.17427	7.30849	7.01337	7.12553	6.80704	6.7334	6.78439	6.61698	7.42773	7.43286	8.21641	8.09641
ENSMUSG00000007989	Fzd3	7.75786	7.60964	7.73928	7.76191	7.647	7.69556	7.39928	7.23582	7.40753	7.56292	7.57135	7.43257	6.77136	6.96122	7.1036	6.96511	6.94442	7.15481	7.0013	7.03208	7.02361	6.94412	6.81865	6.99874	7.80693	7.60896	7.65061	7.67396	7.46421	7.63398	8.3657	8.48439	8.391	8.29626	8.42086	8.53565	7.70226	7.70149	7.34754	7.52228	6.86629	7.00438	7.019	6.9205	7.68883	7.59072	8.4137	8.41759
ENSMUSG00000008035	Mid1ip1	4.34561	4.23852	4.27609	4.2809	4.25662	4.30603	3.91644	3.85841	3.8917	3.94516	3.84497	3.97954	3.72612	3.72563	3.71094	3.71986	3.66326	3.73676	4.14644	4.1132	4.06751	4.10691	4.08434	4.17553	4.46066	4.4845	4.36953	4.387	4.4824	4.43648	5.11845	5.15189	5.18069	5.04971	5.14133	5.118	4.28674	4.28118	3.88885	3.92322	3.72588	3.69802	4.10905	4.12226	4.43823	4.43529	5.15034	5.10301
ENSMUSG00000008036	Ap2s1	9.49388	9.66228	9.58623	9.60042	9.67734	9.8306	9.53537	9.47109	9.55725	9.54736	9.44598	9.60613	9.11858	9.40895	9.26623	9.38139	9.28235	9.26803	9.15714	9.3494	9.21225	9.17647	9.25308	9.04694	9.90093	9.85928	10.1927	10.2418	10.11	10.0595	10.8156	10.866	10.8962	10.8065	10.9386	10.9499	9.58079	9.70279	9.52123	9.53316	9.26377	9.30999	9.2396	9.15883	9.98431	10.1371	10.8592	10.8983
ENSMUSG00000008090	Fgfrl1	NA	NA	NA	NA	NA	NA	NA	NA	NA	NA	NA	NA	NA	NA	NA	NA	NA	NA	NA	NA	NA	NA	NA	NA	NA	NA	NA	NA	NA	NA	1.90333	1.89484	1.94022	1.92559	1.94463	1.92913	NA	NA	NA	NA	NA	NA	NA	NA	NA	NA	1.9128	1.93311
ENSMUSG00000008129	4930432K21Rik	3.48503	3.48984	3.48368	3.55436	3.52335	3.51136	2.75884	2.82504	2.75279	2.7967	2.7276	2.83813	2.84597	2.88055	2.86876	2.88333	2.86149	2.86248	2.77791	2.79216	2.822	2.82681	2.81685	2.87647	3.66945	3.73505	3.73189	3.75022	3.76124	3.68862	4.64893	4.57567	4.557	4.58235	4.57934	4.47968	3.48618	3.52969	2.77889	2.78748	2.86326	2.8712	2.79736	2.84004	3.71213	3.73336	4.59387	4.54713
ENSMUSG00000008136	Fhl2	7.86582	7.8278	7.63641	7.92553	7.79589	8.00971	7.25322	7.56872	7.45313	7.1828	7.09189	7.61914	7.61674	7.42702	7.33078	7.38579	7.28134	7.62575	7.83298	7.48669	7.76222	7.59285	7.58417	7.52702	8.00792	7.97561	7.97352	7.80285	7.84345	7.77086	8.79779	8.74676	8.79246	8.75895	8.93856	8.78718	7.77668	7.91038	7.42502	7.29794	7.52188	7.33264	7.69396	7.56801	7.98568	7.80572	8.779	8.82823
ENSMUSG00000008140	Emc10	8.60445	8.50789	8.12254	8.56559	8.44552	8.37443	8.08506	8.1937	7.94497	7.91898	8.14698	8.10142	8.13144	8.26701	8.25438	8.37262	8.18272	8.05533	8.33896	8.14861	8.17243	8.23126	8.36046	8.23606	8.14387	8.17083	8.28416	8.34471	8.4084	8.18523	9.08311	9.37009	9.13684	8.86437	9.10986	9.01101	8.41163	8.46184	8.07458	8.05579	8.19922	8.26991	8.22	8.27593	8.19962	8.31278	9.19668	8.99508
ENSMUSG00000008153	Clstn3	11.3328	11.2343	11.148	11.2306	11.2348	11.2709	11.0537	10.9207	10.8624	10.8741	10.9037	11.0523	10.8197	10.8077	10.7579	10.9333	10.7891	10.7253	10.8509	10.7894	10.8218	10.7732	10.7733	10.9871	11.3091	11.1238	11.2598	11.2427	11.2342	11.14	11.9875	11.9709	11.9661	11.8061	11.7437	11.7872	11.2384	11.2454	10.9456	10.9434	10.8137	10.8268	10.8207	10.8445	11.2309	11.2057	11.9748	11.779
ENSMUSG00000008167	Fbxw9	2.99325	2.99082	3.07105	3.04437	3.00492	3.03528	2.36723	2.40786	2.36515	2.38978	2.34411	2.4445	2.86321	2.8212	2.846	2.84583	2.84073	2.90682	3.00678	2.93772	3.0292	3.01754	3.01897	2.97562	2.75059	2.74656	2.7927	2.71668	2.71686	2.72192	4.13389	4.12012	4.14544	4.05829	4.12645	4.18473	3.01837	3.02819	2.38008	2.3928	2.84221	2.84419	2.99124	3.00405	2.76328	2.71849	4.13315	4.12316
ENSMUSG00000008200	Fnbp4	6.33109	6.23769	6.20927	6.28314	6.25266	6.31012	5.7709	6.14958	6.12073	5.90893	5.91779	5.95526	6.0325	6.14394	5.99889	5.96427	5.99047	6.20644	5.91071	5.94782	5.91643	5.85345	5.98858	6.05671	6.64369	6.57992	6.5249	6.47836	6.45361	6.49826	7.31999	7.06216	7.23732	7.41292	7.21343	7.29135	6.25935	6.28197	6.01373	5.92733	6.08822	5.98454	5.92499	5.96625	6.58284	6.47674	7.20649	7.3059
ENSMUSG00000008206	Cers4	6.97734	6.83106	6.73585	6.84798	6.74778	6.78429	6.211	6.35468	6.27683	6.0507	6.28359	6.48063	6.18712	6.32133	6.22635	6.30018	6.25532	6.35638	6.61235	6.38678	6.58613	6.38728	6.47672	6.4929	6.84045	6.89945	6.86955	6.81009	6.98263	6.78206	7.63279	7.55283	7.69725	7.36846	7.42562	7.44371	6.84808	6.79335	6.28084	6.27164	6.25423	6.26062	6.52842	6.4523	6.86981	6.85826	7.62762	7.4126
ENSMUSG00000008226	Scrn3	7.14434	7.33592	7.30517	7.21484	7.15015	7.34944	7.02112	7.23077	7.28231	7.28924	7.16027	7.11363	7.11843	7.016	7.04803	7.02459	7.07346	7.20747	6.89649	6.88364	6.87017	6.74897	6.91276	6.79956	7.61654	7.6615	7.61666	7.67792	7.56787	7.74101	8.46849	8.39056	8.4692	8.5161	8.53414	8.44282	7.26181	7.23814	7.17807	7.18771	7.06721	7.0487	6.88343	6.82043	7.63157	7.66226	8.44275	8.49768
ENSMUSG00000008301	Phax	7.78828	7.83827	7.8758	7.93074	7.89484	7.86237	7.59745	7.65108	7.62837	7.54936	7.45038	7.53049	7.55352	7.60618	7.59167	7.59423	7.49362	7.69634	7.50021	7.35092	7.46935	7.38001	7.50621	7.34999	7.98793	7.85844	8.00166	8.06752	7.87949	7.84742	8.61557	8.65774	8.59654	8.71531	8.72279	8.59946	7.83411	7.89598	7.62563	7.51008	7.57985	7.55984	7.44016	7.41207	7.94935	7.93148	8.62328	8.67919
ENSMUSG00000008305	Tle1	7.75885	7.64702	7.57493	7.73651	7.7101	7.61177	7.41917	7.35022	7.39485	7.434	7.10528	7.26561	7.30431	7.33316	7.33188	7.26411	7.2805	7.23861	7.21215	7.2751	7.2929	7.28205	7.32337	7.22591	7.59041	7.50657	7.56096	7.75334	7.59426	7.73211	8.61514	8.7412	8.50703	8.67482	8.63462	8.648	7.66027	7.68613	7.38808	7.26829	7.31874	7.29216	7.26005	7.27711	7.55265	7.69323	8.62113	8.65248
ENSMUSG00000008318	Relt	3.22527	3.22516	3.1683	3.15473	3.18372	3.19217	3.58037	3.5289	3.53013	3.46167	3.76138	3.59678	3.25792	3.1429	3.13564	3.16203	3.20463	3.12952	3.37233	3.35655	3.32766	3.31477	3.31163	3.36718	3.89482	3.84928	3.79556	3.93239	3.90887	3.86702	4.28241	4.30331	4.36285	4.22698	4.27208	4.30604	3.20624	3.17687	3.54647	3.60661	3.20041	3.16743	3.35218	3.3312	3.84655	3.90276	4.31619	4.26837
ENSMUSG00000008333	Snrpb2	7.1026	7.31485	7.45167	7.25098	7.27808	7.46123	7.06356	7.32844	7.39034	7.26863	7.49217	7.33894	6.87045	7.03309	7.01519	6.91154	6.96254	7.05929	6.7036	6.77885	6.67413	6.61903	6.60305	6.63761	7.35908	7.44213	7.41923	7.4541	7.28248	7.51937	8.26833	8.07818	7.99516	8.38705	8.25347	8.21852	7.28971	7.3301	7.26078	7.36658	6.95177	6.96309	6.71886	6.61989	7.40681	7.41865	8.11389	8.28635
ENSMUSG00000008348	Ubc	9.05674	9.21711	9.11932	9.20835	9.12297	9.26491	8.83231	9.08994	8.97466	9.02462	8.95504	9.10512	8.92244	9.00543	9.10067	8.975	9.02669	8.93524	8.94666	9.06201	8.85594	8.97573	9.06595	8.99795	9.50009	9.73323	9.62546	9.62492	9.4463	9.66782	10.2794	10.2858	10.3344	10.5384	10.5384	10.3231	9.13105	9.19874	8.96564	9.02826	8.96393	9.03412	8.95487	9.01321	9.61959	9.57968	10.2999	10.4666
ENSMUSG00000008373	Prpf31	6.82348	6.94164	6.85401	6.9219	6.78934	6.84423	6.51622	6.61088	6.62654	6.74322	6.86753	6.58782	6.48274	6.61743	6.4864	6.58203	6.54725	6.58632	6.50402	6.59265	6.5081	6.6088	6.51332	6.46279	6.81823	6.76337	6.91307	6.74731	6.83767	6.84146	7.75946	7.73317	7.76925	7.84494	7.83391	7.78154	6.87304	6.85182	6.58455	6.73286	6.55009	6.53856	6.53493	6.52831	6.83156	6.80881	7.75396	7.82013
ENSMUSG00000008384	Sertad1	3.12022	3.1902	3.20817	3.22978	3.19841	3.15724	3.50224	3.65037	3.55669	3.67232	3.84109	3.73499	3.75693	3.72772	3.71291	3.7219	3.66476	3.71145	3.73461	3.76306	3.67161	3.64244	3.64996	3.67237	3.99253	3.94967	4.0379	3.9914	3.95764	3.97749	5.15689	5.10689	5.1146	5.11164	5.31681	5.36656	3.17286	3.19514	3.56976	3.74947	3.74232	3.69986	3.72309	3.65492	3.99337	3.97551	5.12613	5.265
ENSMUSG00000008398	Elk3	NA	NA	NA	NA	NA	NA	NA	NA	NA	NA	NA	NA	NA	NA	NA	NA	NA	NA	NA	NA	NA	NA	NA	NA	2.06097	2.05124	2.01356	2.00345	1.99064	2.01045	3.14059	3.12173	3.15295	3.21947	3.25912	3.25509	NA	NA	NA	NA	NA	NA	NA	NA	2.04192	2.00151	3.13842	3.24456
ENSMUSG00000008429	Herpud2	7.58832	7.55373	7.75393	7.59503	7.54891	7.74789	7.34035	7.23313	7.30368	7.49195	7.45419	7.3243	6.88827	7.05723	6.97387	7.00342	6.92032	7.08827	6.93183	6.90585	7.03347	6.92779	6.83346	6.90482	7.50584	7.36999	7.45057	7.5586	7.66436	7.50116	8.53035	8.42483	8.28285	8.33329	8.3634	8.4271	7.632	7.63061	7.29239	7.42348	6.97275	6.96587	6.95705	6.88869	7.44213	7.57471	8.41268	8.37459
ENSMUSG00000008435	Rdh13	4.68531	4.65415	4.70226	4.55906	4.62289	4.68164	4.60408	4.3264	4.27339	4.56441	4.36637	4.39054	4.5109	4.35277	4.36921	4.4578	4.3988	4.40836	4.45128	4.42898	4.34061	4.40494	4.42647	4.36539	4.3659	4.35947	4.35167	4.28996	4.43326	4.35871	5.65808	5.64981	5.67396	5.6818	5.58971	5.62809	4.68057	4.6212	4.40129	4.44044	4.43183	4.4086	4.40696	4.39893	4.35901	4.36064	5.66062	5.6332
ENSMUSG00000008475	Arpc5	8.8279	8.75372	8.8318	8.86382	8.83046	8.55234	8.53714	8.40871	8.35523	8.25827	8.19672	8.04504	8.22657	8.53408	8.2978	8.347	8.28461	8.39261	8.39557	8.11127	8.25931	8.30005	8.35597	8.11106	8.50432	8.53442	8.57833	8.667	8.63599	8.54733	9.51838	9.69711	9.57251	9.71044	9.63704	9.78	8.80447	8.74887	8.43369	8.16667	8.38032	8.3098	8.25538	8.25569	8.53902	8.61677	9.596	9.70916
ENSMUSG00000008489	Elavl2	7.80795	8.03019	7.88244	7.86827	7.79132	8.14443	7.88928	7.90591	7.87038	8.0487	7.9181	8.07251	7.74317	7.60268	7.69802	7.69892	7.76753	7.83309	7.83384	7.75825	7.88865	7.82602	7.66235	7.72303	8.20258	8.21647	8.07837	8.08447	8.24568	8.30238	9.28813	9.03817	9.29826	8.91888	8.94387	8.93872	7.90686	7.93467	7.88852	8.0131	7.67292	7.72149	7.82691	7.73713	8.1658	8.21084	9.20819	8.93382
ENSMUSG00000008540	Mgst1	NA	NA	NA	NA	NA	NA	NA	NA	NA	NA	NA	NA	NA	NA	NA	NA	NA	NA	NA	NA	NA	NA	NA	NA	NA	NA	NA	NA	NA	NA	2.14188	2.14612	2.16685	2.14367	2.17776	2.15568	NA	NA	NA	NA	NA	NA	NA	NA	NA	NA	2.15162	2.15904
ENSMUSG00000008575	Nfib	8.89557	8.88189	8.90101	8.81465	8.8086	8.87325	8.63745	8.71569	8.63893	8.763	8.53271	8.41454	8.49805	8.72841	8.71444	8.55112	8.7215	8.69741	8.56369	8.68364	8.72061	8.68917	8.63536	8.47019	9.07527	9.23983	9.10988	9.17071	9.31274	9.13955	10.1765	10.303	10.1912	10.2894	10.2368	10.3863	8.89282	8.83216	8.66402	8.57009	8.61323	8.66235	8.65598	8.59824	9.14166	9.20767	10.2236	10.3042
ENSMUSG00000008604	Ubqln4	7.49206	7.41714	7.29586	7.41189	7.39284	7.35922	7.31153	7.13613	7.1578	7.32587	7.21676	7.22596	7.22894	7.28945	7.12066	7.16854	7.17455	7.11175	7.23097	7.15237	7.15597	7.19731	7.39408	7.26878	7.6459	7.57595	7.59729	7.62779	7.61761	7.46651	8.41365	8.49145	8.51281	8.42441	8.49823	8.30509	7.40169	7.38799	7.20182	7.2562	7.25919	7.15458	7.17977	7.28672	7.60638	7.57064	8.47264	8.40924
ENSMUSG00000008658	Rbfox1	10.2913	10.1495	10.1086	10.2052	10.1214	9.98491	9.83894	9.94351	9.85933	9.8474	9.6092	9.80492	9.87588	9.83778	9.89295	9.66532	9.71647	9.7595	9.83761	9.72561	9.7456	9.72362	9.7819	9.8352	10.0642	10.1219	10.2052	10.328	10.197	10.1656	11.0649	11.2357	10.9103	11.0276	11.107	11.0517	10.1831	10.1038	9.88059	9.75384	9.85683	9.75825	9.76961	9.78024	10.1304	10.2302	11.0703	11.0621
ENSMUSG00000008668	Rps18	4.18298	4.03022	4.11297	4.0761	4.09438	4.03238	3.50471	3.50594	3.49579	3.58018	3.44666	3.52194	4.2541	4.13139	4.16854	4.15073	4.20618	4.15445	3.52771	3.52226	3.50269	3.6551	3.47884	3.6423	3.89642	3.91659	3.8767	3.92247	3.93633	3.8142	4.76999	4.65152	4.80023	4.85689	4.73477	4.70119	4.10872	4.06762	3.50215	3.51626	4.19274	4.17515	3.51755	3.59208	3.89657	3.891	4.74058	4.76428
ENSMUSG00000008683	Rps15a	6.28844	6.2848	6.31203	6.25991	6.41799	6.38578	6.24905	6.12493	6.31502	6.15048	6.07559	6.18824	5.85153	5.98655	5.93431	6.0363	6.04377	6.05863	6.10762	5.92087	6.37948	5.96872	6.03962	5.94568	6.68738	6.53894	6.53478	6.37236	6.45106	6.68493	7.41884	7.20159	7.1469	7.26018	7.13674	7.2386	6.29509	6.35456	6.22967	6.1381	5.91904	6.00479	6.13599	5.98467	6.58703	6.50278	7.25578	7.21184
ENSMUSG00000008690	Ncaph2	6.85425	6.77579	6.77258	6.81136	6.82264	6.56115	6.5992	6.5117	6.40792	6.39011	6.54149	6.32245	6.50042	6.59118	6.48132	6.4781	6.59974	6.54909	6.4287	6.63005	6.36295	6.44292	6.53474	6.65184	6.63256	6.6947	6.77988	6.64278	6.75947	6.70971	7.43116	7.74929	7.63439	7.68566	7.62764	7.57515	6.80088	6.73172	6.50627	6.41802	6.5458	6.51972	6.4739	6.54317	6.70238	6.70399	7.60495	7.62948
ENSMUSG00000008730	Hipk1	8.17583	8.07297	8.22818	8.06982	8.07911	7.92926	7.61042	7.44021	7.55572	7.7135	7.43594	7.49688	7.82368	7.82627	7.71452	7.77131	7.8417	7.69986	7.60363	7.56975	7.61155	7.7488	7.60457	7.739	8.24983	8.23718	8.08153	8.06625	8.1261	8.09689	9.05121	9.14499	8.99512	9.09455	9.094	9.19868	8.15899	8.02606	7.53545	7.54877	7.82498	7.77584	7.59498	7.69746	8.18951	8.09641	9.06377	9.12908
ENSMUSG00000008734	Gprc5b	6.92111	6.8358	6.93819	6.94509	6.79943	6.80709	6.68137	6.71652	6.79802	6.83859	6.92099	6.7901	6.69457	6.61917	6.51109	6.46281	6.48735	6.42467	6.69767	6.59963	6.7204	6.6172	6.56712	6.39698	7.36988	7.35922	7.32072	7.56046	7.59606	7.42885	8.20932	8.5355	8.3686	8.52766	8.48557	8.75375	6.89837	6.85054	6.73197	6.8499	6.65687	6.48708	6.67257	6.5271	7.34994	7.52846	8.37114	8.58899
ENSMUSG00000008763	Man1a2	7.76257	7.64243	7.62181	7.58339	7.46078	7.68992	7.11244	7.16693	7.29142	7.21678	7.17162	7.10253	6.93946	7.07902	7.00864	7.10328	7.04267	7.06153	6.93966	6.87096	6.9658	6.89812	6.83426	7.03611	7.31939	7.43399	7.41546	7.34043	7.51177	7.36921	8.19369	8.19624	8.0951	8.25238	8.33528	8.24784	7.67561	7.57803	7.19027	7.16365	7.00924	7.05153	6.92547	6.92283	7.38961	7.40714	8.16168	8.2785
ENSMUSG00000008822	Acyp1	7.33191	7.38017	7.46186	7.35591	7.29576	7.68537	7.33565	7.40723	7.54715	7.36697	7.26111	7.53306	6.97281	6.9576	7.08574	6.97309	7.1177	6.79397	6.711	6.9599	6.73861	6.5796	6.82174	6.72574	7.65267	7.7977	7.92454	8.01117	7.83145	8.09655	8.61532	8.30507	8.40869	8.71667	8.69157	8.49337	7.39132	7.44568	7.43001	7.38705	6.96521	7.05884	6.80317	6.70903	7.79163	7.97972	8.44303	8.63387
ENSMUSG00000008855	Hdac5	7.22736	7.01002	6.99175	7.17637	7.20575	6.83958	6.54636	6.27284	6.39259	6.46507	6.43506	6.1975	6.72249	6.77201	6.50388	6.53223	6.52355	6.76497	6.24429	6.38297	6.36013	6.45418	6.57172	6.73166	6.73547	6.91854	6.59781	6.72414	6.62367	6.65446	7.44788	7.51666	7.66654	7.76463	7.66761	7.52857	7.07638	7.0739	6.40393	6.36588	6.74725	6.51988	6.32913	6.58586	6.75061	6.66742	7.5437	7.6536
ENSMUSG00000008859	Rala	7.6559	7.69162	7.68863	7.73025	7.72734	7.70628	7.23664	7.30972	7.19768	7.22431	6.97796	7.07065	6.95805	7.2727	7.1265	7.08702	7.07462	7.13655	7.05288	6.94695	7.02016	7.12832	7.03773	7.09245	7.58937	7.73462	7.61439	7.54233	7.62723	7.61725	8.48573	8.41629	8.4068	8.4697	8.36425	8.41551	7.67872	7.72129	7.24801	7.09097	7.11538	7.09605	7.00667	7.08617	7.64613	7.5956	8.43627	8.41649
ENSMUSG00000008892	Vdac3	7.36366	7.43263	7.31642	7.43264	7.26341	7.3884	6.86761	7.00365	7.17314	7.00379	7.09402	6.9925	6.82217	7.07092	6.83125	6.93045	6.89067	6.9538	6.76999	6.97041	7.13204	6.80563	6.99202	6.9191	7.45563	7.37612	7.56052	7.43187	7.2587	7.49273	8.22007	8.31215	8.37965	8.28871	8.26721	8.36937	7.3709	7.36149	7.0148	7.0301	6.94654	6.88412	6.95748	6.90559	7.46409	7.39443	8.30396	8.30843
ENSMUSG00000008958	Vps72	5.80084	5.85621	5.88137	5.72698	5.81956	5.84124	5.08225	5.20767	5.28378	5.24014	5.35603	5.1932	5.33212	5.37406	5.36795	5.46374	5.31809	5.39225	4.93356	4.9151	5.00307	5.00772	5.05774	5.00602	5.54191	5.5673	5.59037	5.44437	5.5189	5.47888	6.42874	6.48561	6.4032	6.46446	6.34257	6.40834	5.84614	5.79593	5.19123	5.26312	5.35309	5.38326	4.95058	5.02383	5.56653	5.48072	6.43918	6.40513
ENSMUSG00000008976	Gabpa	6.50568	6.49304	6.58902	6.48003	6.29799	6.37902	6.00829	5.9943	6.11629	6.14389	6.04734	5.88152	5.7964	5.9536	5.88531	5.85634	5.87082	5.85663	5.6989	5.78934	5.94246	5.67525	5.72584	5.78783	6.5105	6.57703	6.41591	6.49554	6.59059	6.49917	7.41617	7.6058	7.35964	7.61991	7.5786	7.55576	6.52925	6.38568	6.03963	6.02425	5.875	5.87082	5.81023	5.72964	6.50114	6.52843	7.46054	7.58476
ENSMUSG00000008999	Bmp7	NA	NA	NA	NA	NA	NA	NA	NA	NA	NA	NA	NA	NA	NA	NA	NA	NA	NA	NA	NA	NA	NA	NA	NA	NA	NA	NA	NA	NA	NA	1.42168	1.40304	1.44776	1.39396	1.46069	1.39642	NA	NA	NA	NA	NA	NA	NA	NA	NA	NA	1.42416	1.41702
ENSMUSG00000009013	Dynll1	10.4404	10.3186	10.6523	10.4109	10.5016	10.6052	10.1792	10.3486	10.3722	10.4468	10.3805	10.4271	10.4902	10.2691	10.2527	10.2618	10.2261	10.4234	10.4182	10.0667	10.5487	10.2639	10.1183	10.09	11.0476	10.9034	10.7246	10.8056	10.9308	10.7737	11.9876	11.7386	12.0166	12.0434	11.8573	11.7752	10.4704	10.5059	10.3	10.4181	10.3796	10.2469	10.3445	10.1574	10.8919	10.8367	11.9143	11.892
ENSMUSG00000009030	Pdcl	6.35193	6.19318	6.3253	6.30302	6.27604	6.35534	6.11754	6.2258	6.32574	6.27364	6.24192	6.12117	5.721	5.83763	5.85616	5.76476	5.75933	5.71183	5.81869	5.92973	5.88076	5.86434	5.88325	5.87313	6.4951	6.62708	6.53408	6.54754	6.65536	6.67988	7.39913	7.32146	7.24273	7.33848	7.57229	7.26806	6.29014	6.31147	6.22303	6.21224	5.77932	5.79342	5.87639	5.87357	6.55209	6.62759	7.32111	7.39294
ENSMUSG00000009035	Tmem184b	5.93468	5.81528	5.95945	5.83306	5.86496	5.87092	5.45451	5.30763	5.37885	5.21364	5.3201	5.44422	5.65679	5.58095	5.65435	5.83752	5.65707	5.6086	5.92157	5.77101	5.83978	5.97963	6.04128	5.96239	5.82699	5.89156	5.80278	5.72684	5.82842	5.75493	6.59288	6.75011	6.70768	6.64074	6.75872	6.70905	5.90314	5.85631	5.38033	5.32599	5.61887	5.71631	5.84412	5.99443	5.84044	5.77006	6.68356	6.70284
ENSMUSG00000009073	Nf2	6.51452	6.50895	6.5605	6.55453	6.50866	6.48797	6.26167	6.07361	6.11538	6.08266	6.22295	6.06957	6.2317	6.22245	6.05443	6.03456	6.02639	6.18147	5.8139	5.91229	5.92427	5.88249	5.93177	6.00431	6.47519	6.34007	6.36356	6.50443	6.37867	6.49307	7.41244	7.56917	7.39444	7.53008	7.35701	7.49783	6.52799	6.51705	6.15022	6.12506	6.22708	6.03846	5.88349	5.93952	6.39294	6.45872	7.45868	7.46164
ENSMUSG00000009075	Cabp7	7.63627	7.61796	7.61682	7.60804	7.57207	7.38407	7.16437	6.9406	6.94845	6.9822	6.82018	6.79377	7.48282	7.44869	7.31751	7.34507	7.31311	7.40653	7.27323	7.21577	7.33196	7.25537	7.49712	7.28516	7.371	7.65004	7.41109	7.43556	7.65042	7.56926	8.49579	8.77223	8.64002	8.72705	8.73459	8.7332	7.62368	7.52139	7.01781	6.86538	7.46575	7.32523	7.27365	7.34588	7.47738	7.55175	8.63601	8.73161
ENSMUSG00000009076	Zmat5	5.57697	5.67858	5.64611	5.47861	5.57028	5.6147	5.36357	5.28355	5.1849	5.24559	5.04644	5.28182	5.42876	5.46781	5.3573	5.36759	5.28641	5.50422	5.50062	5.35259	5.45419	5.30108	5.52951	5.40684	5.84155	5.95397	5.95155	5.95964	5.90584	5.8536	6.69475	6.90756	6.73562	6.84852	6.90193	6.80364	5.63389	5.55453	5.27734	5.19128	5.44828	5.3371	5.4358	5.41248	5.91569	5.90636	6.77931	6.85136
ENSMUSG00000009079	Ewsr1	8.00483	7.97221	7.7536	8.02138	7.93855	7.84021	7.50222	7.54568	7.44397	7.52543	7.69822	7.66103	7.84468	7.72624	7.60093	7.54939	7.61118	7.72729	7.61512	7.67757	7.63612	7.83187	7.67491	7.83725	7.81832	8.11093	8.03326	8.02817	7.90264	7.94903	8.9527	8.96137	8.99807	8.91108	9.07785	8.98975	7.91021	7.93338	7.49729	7.62823	7.78546	7.58717	7.64294	7.78135	7.9875	7.95994	8.97071	8.9929
ENSMUSG00000009090	Ap1b1	9.5393	9.71968	9.71195	9.62172	9.63507	9.60029	9.33503	9.14946	9.14647	9.26087	9.17392	9.27758	9.46079	9.35272	9.35033	9.35208	9.36067	9.41763	9.3445	9.21204	9.24615	9.24225	9.24146	9.29458	9.88548	9.93509	9.79423	9.8037	9.75207	9.74282	10.7042	10.673	10.7769	10.6757	10.5666	10.6498	9.65698	9.61903	9.21032	9.23746	9.40675	9.35436	9.26756	9.25943	9.8716	9.7662	10.718	10.6307
ENSMUSG00000009112	Bcl2l13	6.36076	6.33046	6.24624	6.23544	6.21852	6.1865	5.74923	5.80151	5.7871	5.83219	5.9847	5.89082	5.87435	5.77829	5.8727	5.86657	5.85313	5.87021	5.84364	5.7865	5.74623	5.89103	5.84762	5.75758	6.12054	6.17643	6.20027	6.25056	6.11673	6.08428	6.91289	6.86216	6.94566	6.95704	6.97983	7.04105	6.31248	6.21349	5.77928	5.90257	5.82632	5.86413	5.79212	5.83208	6.16574	6.15052	6.9069	6.99264
ENSMUSG00000009207	Lnpk	8.74197	8.83418	9.0197	8.86561	8.80755	9.14621	8.83528	8.80355	9.0234	9.06391	8.71681	8.91315	8.24804	8.32088	8.51434	8.46546	8.4182	8.11809	8.05795	8.23855	8.02596	7.93541	8.01418	7.99351	8.90926	8.96092	9.09583	9.01529	9.0866	9.31322	9.66776	9.64299	9.6126	9.57329	9.66718	9.47253	8.86528	8.93979	8.88741	8.89796	8.28446	8.466	8.10749	7.98103	8.98867	9.13837	9.64112	9.571
ENSMUSG00000009216	Fam163b	6.42528	6.0838	6.01693	6.17704	6.09683	5.81947	5.43053	5.54031	5.39284	5.1565	5.15458	5.50724	6.14449	6.02702	5.99888	6.01878	6.00882	6.02157	6.59195	6.37143	6.49532	6.5523	6.47885	6.47181	6.0795	6.17445	6.01509	6.2238	6.23924	5.99305	6.85884	7.11182	7.11534	7.14997	7.30878	7.23478	6.17534	6.03111	5.45456	5.27277	6.08575	6.00883	6.48623	6.50099	6.08968	6.15203	7.02866	7.23118
ENSMUSG00000009291	Pttg1ip	3.24799	3.28917	3.31512	3.27422	3.30865	3.24637	3.26591	3.28001	3.26109	3.3749	3.1849	3.21519	3.33376	3.28585	3.26126	3.23072	3.32274	3.26377	2.88891	2.93094	2.90214	2.89616	2.85033	2.95554	2.99439	2.98468	2.94272	3.01607	3.00789	2.99617	4.39214	4.28988	4.33188	4.28023	4.41178	4.30946	3.28409	3.27642	3.26901	3.25833	3.3098	3.27157	2.90733	2.90068	2.97393	3.00671	4.33796	4.33382
ENSMUSG00000009292	Trpm2	5.37656	5.33537	5.29194	5.28306	5.39167	5.27665	4.62066	4.70905	4.64271	4.50879	4.54704	4.52397	5.34994	5.28713	5.24989	5.33934	5.30948	5.3103	5.44907	5.38773	5.30225	5.43474	5.55373	5.51801	5.46088	5.52002	5.43675	5.61903	5.4173	5.46978	6.25871	6.25595	6.29817	6.27339	6.15775	6.27913	5.33462	5.31712	4.65747	4.5266	5.31853	5.29957	5.37968	5.50216	5.47255	5.50204	6.27094	6.23675
ENSMUSG00000009293	Ube2g2	5.5664	5.56938	5.42423	5.57533	5.56656	5.50496	5.71731	5.47557	5.47815	5.68796	5.65746	5.43109	5.0205	5.20371	5.07785	5.14151	5.1569	5.08723	4.8875	4.97419	4.93546	4.92737	4.97308	4.89029	5.65248	5.67861	5.75006	5.83918	5.81205	5.7927	6.3619	6.65544	6.31618	6.5259	6.7111	6.47875	5.52	5.54895	5.55701	5.59217	5.11211	5.12542	4.93239	4.93024	5.69372	5.81464	6.4445	6.57192
ENSMUSG00000009376	Met	5.47602	5.46954	5.45656	5.52566	5.53437	5.60159	5.36173	5.42144	5.32889	5.40875	5.5946	5.2083	4.98079	4.97529	5.13822	4.97963	5.05914	5.00427	4.76335	4.7193	4.86732	4.64853	4.68709	4.83258	5.33661	5.15446	5.30139	5.39626	5.26546	5.30434	5.47677	5.48667	5.54914	5.30573	5.26673	5.30634	5.46737	5.55387	5.37068	5.40388	4.97804	5.059	4.78332	4.72274	5.26416	5.32202	5.5042	5.29293
ENSMUSG00000009394	Syn2	10.8659	11.1347	10.8215	10.9726	10.9765	11.1742	10.7564	10.7828	10.8629	10.9194	10.9196	10.7988	10.8218	10.7934	10.783	10.7692	10.8524	11.0171	10.8545	10.8658	10.7847	10.8068	10.9224	10.816	11.3454	11.6021	11.4701	11.4655	11.5702	11.4812	12.4917	12.3146	12.2891	12.3857	12.3953	12.2714	10.9407	11.0411	10.8007	10.8792	10.8076	10.8015	10.835	10.8484	11.4726	11.5057	12.3651	12.3508
ENSMUSG00000009406	Elk1	5.34881	5.14399	5.05024	5.07623	5.09921	4.99051	4.39504	4.32939	4.36041	4.33168	4.31972	4.28421	5.18788	5.12714	5.00531	5.02215	5.04342	4.96695	5.07028	5.05064	5.06675	5.21213	5.18278	5.25366	5.51037	5.61504	5.47516	5.60462	5.51311	5.50236	6.54543	6.45053	6.59295	6.68816	6.79194	6.66851	5.18102	5.05532	4.36161	4.31187	5.15751	5.02363	5.06256	5.21619	5.53352	5.54003	6.52963	6.7162
ENSMUSG00000009418	Nav1	7.83802	7.81699	7.80215	7.86887	7.90959	7.72781	7.55611	7.54507	7.39395	7.67126	7.41389	7.28185	7.75873	7.75087	7.63767	7.78816	7.74126	7.63003	7.62001	7.61176	7.37531	7.63113	7.76043	7.75436	7.6445	7.87592	7.87728	7.8383	7.76256	7.78888	8.78039	8.81437	8.89637	8.67719	9.01897	8.69107	7.81905	7.83542	7.49838	7.45567	7.7548	7.72236	7.53569	7.71531	7.79923	7.79658	8.83038	8.79574
ENSMUSG00000009470	Tnpo1	5.62901	5.57774	5.63686	5.6381	5.59938	5.68247	5.29588	5.20192	5.30424	5.4083	5.12507	5.27101	5.34851	5.35459	5.40606	5.42019	5.34737	5.30986	5.21842	5.19632	5.18873	5.131	5.13687	5.19109	5.90697	5.91386	5.83361	5.99193	5.98946	6.0066	6.94159	7.00146	6.88937	6.92291	6.88604	6.86837	5.61453	5.63998	5.26735	5.26813	5.35155	5.39121	5.20115	5.15298	5.88482	5.996	6.94414	6.89244
ENSMUSG00000009535	Rnmt	8.42362	8.48321	8.59146	8.54563	8.51304	8.7239	8.39295	8.43956	8.59254	8.46996	8.39959	8.48977	8.22612	8.23863	8.21896	8.20558	8.27924	8.26459	8.00748	8.21458	8.06502	8.01447	8.08957	7.96052	8.82163	9.06645	8.86221	8.911	8.92505	9.0777	9.74235	9.3597	9.49449	9.74362	9.73294	9.60662	8.49943	8.59419	8.47501	8.45311	8.23237	8.23459	8.09569	8.02152	8.91676	8.97125	9.53218	9.69439
ENSMUSG00000009549	Srp14	7.9162	7.88233	7.97287	7.94732	7.94763	7.8593	7.22771	7.3885	7.2617	7.14481	7.19743	7.25665	7.67667	7.62389	7.45122	7.37991	7.539	7.75729	7.58297	7.45343	7.5282	7.64248	7.49248	7.62091	7.72922	7.64612	7.68214	7.74245	7.69057	7.54113	8.63175	8.78458	8.69788	8.69311	8.5864	8.81886	7.9238	7.91808	7.29264	7.19963	7.65028	7.45671	7.52153	7.58529	7.68583	7.65805	8.70474	8.69946
ENSMUSG00000009555	Cdk9	6.42896	6.50486	6.48721	6.53084	6.55964	6.48868	5.89381	5.84403	5.84176	5.70226	5.67125	5.80747	6.15596	6.08547	5.99095	5.98195	6.1094	6.0669	6.25997	6.10588	6.32299	6.27394	6.25029	6.23879	6.31476	6.19674	6.38342	6.2741	6.36732	6.15466	7.2802	7.31528	7.30285	7.27802	7.3364	7.37104	6.47368	6.52639	5.85987	5.72699	6.12072	6.02743	6.22961	6.25434	6.2983	6.26536	7.29944	7.32849
ENSMUSG00000009563	Tor2a	3.75335	3.78642	3.76303	3.79591	3.79007	3.75278	2.98618	3.03375	3.03876	2.96233	2.97399	3.05988	3.53514	3.4584	3.46947	3.46209	3.51099	3.53641	3.66244	3.6468	3.68311	3.56549	3.60535	3.67872	3.59846	3.58146	3.70198	3.63061	3.58943	3.64964	4.46386	4.68552	4.56272	4.56583	4.55727	4.56611	3.7676	3.77959	3.01957	2.99873	3.49677	3.48085	3.66411	3.61652	3.6273	3.62323	4.5707	4.56307
ENSMUSG00000009566	Fpgs	2.53583	2.60721	2.61292	2.622	2.59646	2.60354	2.64882	2.66145	2.57814	2.55757	2.68475	2.57309	2.90076	2.88972	2.9438	2.88261	2.84386	2.89655	2.86156	2.7912	2.82413	2.82677	2.96891	2.7891	2.95492	2.93647	2.91737	2.96741	2.88352	2.97811	3.97676	3.9904	3.96293	4.02162	3.91379	3.94089	2.58532	2.60734	2.62947	2.60514	2.89524	2.89009	2.82563	2.86159	2.93625	2.94301	3.9767	3.95877
ENSMUSG00000009569	Mrtfb	10.0577	10.1052	10.2006	10.23	10.0383	10.104	9.73897	9.89023	9.76444	9.92115	9.86028	9.78453	9.90784	9.9075	9.99848	9.88973	9.89295	9.80838	9.78013	9.8749	9.72958	9.91709	9.7545	9.83498	10.3681	10.4701	10.3214	10.2784	10.4383	10.4884	11.2932	11.1495	11.2133	11.4077	11.2855	11.3282	10.1212	10.1241	9.79788	9.85532	9.90767	9.92706	9.79487	9.83553	10.3865	10.4017	11.2187	11.3405
ENSMUSG00000009575	Cbx5	8.9568	8.98189	9.08576	8.89383	8.99026	9.0891	8.84413	8.93644	8.96337	8.85163	8.99914	8.87477	8.5688	8.71506	8.74916	8.55044	8.65701	8.80654	8.63053	8.57476	8.8223	8.61592	8.42974	8.43226	9.45601	9.25432	9.07162	9.08854	9.25693	9.19529	10.2602	9.7838	10.0395	10.0975	9.90442	9.94379	9.00815	8.99106	8.91464	8.90852	8.64193	8.6522	8.67586	8.49264	9.26065	9.18026	10.0278	9.98189
ENSMUSG00000009614	Sardh	NA	NA	NA	NA	NA	NA	NA	NA	NA	NA	NA	NA	NA	NA	NA	NA	NA	NA	NA	NA	NA	NA	NA	NA	NA	NA	NA	NA	NA	NA	2.7597	2.78048	2.76454	2.83098	2.81746	2.87807	NA	NA	NA	NA	NA	NA	NA	NA	NA	NA	2.76824	2.84217
ENSMUSG00000009621	Vav2	NA	NA	NA	NA	NA	NA	NA	NA	NA	NA	NA	NA	NA	NA	NA	NA	NA	NA	NA	NA	NA	NA	NA	NA	1.70993	1.7049	1.72122	1.6945	1.75308	1.74549	2.43725	2.45021	2.42877	2.43826	2.41171	2.44719	NA	NA	NA	NA	NA	NA	NA	NA	1.71202	1.73102	2.43874	2.43239
ENSMUSG00000009628	Tex15	NA	NA	NA	NA	NA	NA	1.71145	1.72345	1.76475	1.78548	1.82797	1.76367	NA	NA	NA	NA	NA	NA	NA	NA	NA	NA	NA	NA	NA	NA	NA	NA	NA	NA	NA	NA	NA	NA	NA	NA	NA	NA	1.73322	1.79237	NA	NA	NA	NA	NA	NA	NA	NA
ENSMUSG00000009630	Ppp2cb	9.01907	9.02529	9.11852	8.99296	9.00526	9.0855	8.82944	8.74023	8.86699	8.77801	8.88832	8.72908	8.7473	8.71826	8.58403	8.55513	8.57466	8.61938	8.79492	8.68003	8.73115	8.59611	8.68084	8.52437	9.3655	9.28355	9.23501	9.29838	9.33536	9.20912	10.2535	9.9441	10.1176	10.0353	9.8984	10.0463	9.0543	9.02791	8.81222	8.79847	8.73278	8.57127	8.73537	8.60044	9.29469	9.28095	10.105	9.99333
ENSMUSG00000009640	Dmap1	6.77876	6.73272	6.61809	6.75165	6.71667	6.61989	6.17567	6.26305	6.1653	6.19625	6.00545	6.25593	6.54822	6.59203	6.52519	6.59189	6.53951	6.64177	6.66613	6.58852	6.47322	6.5583	6.5931	6.70721	6.82586	6.96755	6.91559	6.85686	6.88018	6.78935	7.63843	7.74342	7.70025	7.6483	7.68977	7.76719	6.70986	6.69607	6.20134	6.15254	6.57012	6.5522	6.57596	6.61954	6.903	6.84213	7.69403	7.70175
ENSMUSG00000009647	Mcu	7.0101	6.89429	7.01878	6.96668	6.91909	7.03556	6.50072	6.70027	6.52291	6.31491	6.47779	6.65281	6.69191	6.66791	6.69299	6.61701	6.60033	6.67503	6.78048	6.78371	6.8015	6.77055	6.83685	6.78794	6.99223	7.04638	6.96508	7.07898	7.09225	7.06216	7.94636	7.95424	7.98619	7.9226	7.87934	7.83076	6.97439	6.97378	6.57463	6.48183	6.67991	6.63678	6.78857	6.79845	7.00123	7.0778	7.96226	7.87757
ENSMUSG00000009681	Bcr	8.6887	8.61357	8.74351	8.73212	8.88471	8.396	8.33945	8.22287	8.18546	8.2989	8.29418	7.88679	8.73693	8.69633	8.51388	8.60867	8.57241	8.58312	8.21912	8.31258	8.237	8.40464	8.50336	8.33363	8.608	8.70993	8.58034	8.77055	8.58958	8.55455	9.54257	9.61283	9.61899	9.6938	9.74622	9.86304	8.68193	8.67095	8.24926	8.15996	8.71663	8.56499	8.25623	8.41388	8.63276	8.63822	9.59146	9.76769
ENSMUSG00000009687	Fxyd5	NA	NA	NA	NA	NA	NA	2.25241	2.25593	2.25535	2.31966	2.30524	2.32612	2.22511	2.15942	2.19329	2.1722	2.22924	2.19946	NA	NA	NA	NA	NA	NA	2.44302	2.3598	2.40655	2.36647	2.38463	2.40332	2.89696	2.85205	2.832	2.87806	2.85725	2.8106	NA	NA	2.25456	2.31701	2.19227	2.19824	NA	NA	2.40312	2.38481	2.86034	2.84864
ENSMUSG00000009731	Kcnd1	4.43851	4.41076	4.52689	4.54362	4.58345	4.58997	4.09932	4.10727	4.10483	4.03469	4.06421	4.09355	4.53385	4.5026	4.51254	4.53594	4.52718	4.48672	4.3663	4.49917	4.47423	4.56201	4.41685	4.42452	4.45291	4.44149	4.40322	4.41502	4.54945	4.45412	5.58567	5.75587	5.70676	5.64706	5.72172	5.71801	4.45872	4.57234	4.10381	4.06415	4.51823	4.52522	4.44657	4.46779	4.43254	4.47287	5.68277	5.6956
ENSMUSG00000009733	Tfcp2	6.01227	6.02776	5.91438	5.81844	5.84165	5.91885	5.20515	5.34059	5.23451	5.27607	5.03567	5.2434	5.34362	5.46474	5.391	5.41202	5.37632	5.61806	5.07421	5.12677	5.17366	5.23147	5.27403	5.35916	5.88418	5.98552	5.8761	5.88787	5.85814	5.81971	6.48176	6.58458	6.52297	6.51822	6.66655	6.65574	5.9848	5.85965	5.26008	5.18505	5.40418	5.39311	5.12488	5.28822	5.91527	5.85524	6.52977	6.6135
ENSMUSG00000009739	Pou6f1	5.12949	5.17155	5.00796	5.16817	5.09647	5.02539	4.82577	4.68039	4.58682	4.55339	4.89639	4.69298	5.20469	5.10712	5.03881	5.07966	4.99116	5.0492	5.16545	5.07548	5.1781	5.14397	5.26691	5.26593	5.11875	5.15393	4.92503	4.9602	5.10118	5.0259	5.87172	6.03964	6.01922	5.85616	5.91884	6.03298	5.103	5.09668	4.69766	4.71425	5.15591	5.03654	5.13968	5.2256	5.0659	5.02909	5.97686	5.93599
ENSMUSG00000009741	Ubp1	6.66431	6.68189	6.62999	6.60089	6.64405	6.6813	6.77306	6.57861	6.66881	6.93237	6.88142	6.67798	6.48519	6.39435	6.49115	6.54925	6.60512	6.38195	6.3066	6.37352	6.14996	6.20403	6.25459	6.11468	6.85461	6.85081	6.92083	6.72611	6.95017	6.98516	7.72527	7.84178	7.76449	7.65734	7.85371	7.69535	6.65873	6.64208	6.67349	6.83059	6.43977	6.54851	6.27669	6.1911	6.87542	6.88715	7.77718	7.73547
ENSMUSG00000009772	Nuak2	NA	NA	NA	NA	NA	NA	NA	NA	NA	NA	NA	NA	NA	NA	NA	NA	NA	NA	NA	NA	NA	NA	NA	NA	NA	NA	NA	NA	NA	NA	2.10983	2.07968	2.10066	2.06092	2.08216	2.0893	NA	NA	NA	NA	NA	NA	NA	NA	NA	NA	2.09672	2.07746
ENSMUSG00000009828	Ick	3.83971	3.8538	3.91131	3.91551	3.85405	3.8378	3.76425	3.71047	3.74073	3.62734	3.72874	3.74742	3.9737	3.89598	3.90288	3.89075	3.91129	3.84336	3.59657	3.64186	3.61431	3.50117	3.59892	3.54823	4.35194	4.4554	4.3772	4.34818	4.36596	4.36971	4.85564	4.93519	4.86506	4.90534	4.95152	4.86766	3.86827	3.86912	3.73848	3.70117	3.93484	3.90164	3.61758	3.54944	4.39485	4.36128	4.8853	4.90817
ENSMUSG00000009863	Sdhb	9.75738	9.71412	9.7145	9.77629	9.70084	9.80275	9.33424	9.49177	9.50606	9.37973	9.51801	9.41741	9.35529	9.4374	9.3187	9.28382	9.35352	9.32483	9.29965	9.26738	9.10662	9.28434	9.3652	9.24483	9.74044	9.72266	9.98137	10.0154	9.67604	9.829	10.4681	10.5291	10.4828	10.5052	10.5698	10.6414	9.72866	9.75996	9.44402	9.43839	9.39635	9.31868	9.22455	9.29812	9.81482	9.84014	10.4933	10.5722
ENSMUSG00000009894	Snap47	10.592	10.6996	10.6964	10.6734	10.6088	10.655	10.3412	10.3074	10.2794	10.299	10.3078	10.4066	10.4176	10.2914	10.3258	10.3546	10.3348	10.3979	10.3377	10.2819	10.3226	10.3768	10.2615	10.2264	10.8262	10.973	10.836	10.7943	10.7982	10.831	11.7282	11.7369	11.8293	11.8943	11.884	11.8018	10.6627	10.6457	10.3094	10.3378	10.3545	10.3384	10.3141	10.2882	10.8784	10.8078	11.7648	11.86
ENSMUSG00000009905	Kdsr	6.91585	6.90994	6.97556	6.82655	6.85457	6.88446	6.74798	6.62639	6.58592	6.75559	6.583	6.64633	6.50231	6.43469	6.45996	6.29516	6.24551	6.31555	6.41277	6.4024	6.50983	6.46954	6.42691	6.44236	6.98631	6.96717	7.12164	6.90078	7.05704	6.98872	7.96407	7.90055	7.84151	7.82816	7.86031	7.9177	6.93378	6.85519	6.65343	6.66164	6.4685	6.33354	6.44167	6.44627	7.02504	6.98218	7.90204	7.86872
ENSMUSG00000009907	Vps4b	7.24966	7.1733	7.1101	7.16292	7.25058	7.14929	6.92683	7.1119	7.09884	6.93008	6.93152	7.06776	6.83556	6.90662	6.86911	6.88606	6.91238	6.88173	6.91716	6.83318	6.79197	6.8971	6.76782	6.69418	7.43707	7.58453	7.65764	7.73226	7.5531	7.66048	8.2669	8.20286	8.19574	8.4007	8.34959	8.24534	7.17769	7.1876	7.04586	6.97645	6.87109	6.88918	6.84744	6.78637	7.55974	7.64861	8.22183	8.33188
ENSMUSG00000009927	Rps25	3.8366	3.7127	3.71293	3.77754	3.74432	3.73411	2.6378	2.60199	2.59269	2.6787	2.5555	2.57241	3.92666	3.79052	3.87192	3.75414	3.83649	3.83973	4.06925	4.07052	4.08943	4.1688	4.14646	4.36711	2.50369	2.56722	2.47768	2.50973	2.59843	2.50337	3.86464	3.78037	3.77286	3.84605	3.82136	3.78915	3.75408	3.75199	2.61083	2.6022	3.85859	3.82085	4.0764	4.22746	2.5162	2.53718	3.80595	3.81885
ENSMUSG00000009995	Taz	5.70448	5.55528	5.64747	5.59157	5.56725	5.68746	5.55175	5.61529	5.54183	5.48272	5.77117	5.56394	5.35496	5.24882	5.31157	5.33771	5.27676	5.35156	5.30262	5.2408	5.28443	5.25171	5.23837	5.20921	5.88669	5.74654	5.75974	5.73114	5.73403	5.74477	6.70827	6.60279	6.73759	6.6268	6.62069	6.69029	5.63574	5.61543	5.56962	5.60594	5.30189	5.30868	5.27595	5.2331	5.79765	5.73665	6.68288	6.64592
ENSMUSG00000010025	Aldh3a2	7.42746	7.36545	7.35257	7.34467	7.3293	7.44327	6.91068	6.99337	6.99869	6.7948	6.91246	6.95772	7.0838	7.04249	7.11764	6.99442	7.14408	7.08377	6.97224	7.09393	6.9912	6.96283	7.12983	7.08897	7.50606	7.69404	7.64871	7.74607	7.55834	7.62126	8.41089	8.39241	8.38769	8.35255	8.37444	8.31152	7.38183	7.37241	6.96758	6.88833	7.06315	7.08538	7.01912	7.06054	7.61627	7.64189	8.397	8.34617
ENSMUSG00000010044	Zmynd10	NA	NA	NA	NA	NA	NA	NA	NA	NA	NA	NA	NA	NA	NA	NA	NA	NA	NA	NA	NA	NA	NA	NA	NA	2.23651	2.26266	2.21185	2.24589	2.25694	2.21818	2.72238	2.76529	2.71331	2.72158	2.73899	2.72175	NA	NA	NA	NA	NA	NA	NA	NA	2.23701	2.24033	2.73366	2.72744
ENSMUSG00000010045	Tmem115	5.863	5.87008	5.6496	5.84788	5.80165	5.86059	5.45332	5.68267	5.50547	5.53702	5.65882	5.62885	5.77334	5.88883	5.84607	5.78402	5.88619	5.77727	5.75321	5.70869	5.86604	5.73712	5.75132	5.73078	5.94518	5.73545	5.82209	5.82194	5.93757	5.78655	6.80507	6.93879	6.80413	6.74108	6.75606	6.70594	5.79423	5.83671	5.54715	5.60823	5.83109	5.83876	5.77598	5.73974	5.83424	5.84869	6.84933	6.73436
ENSMUSG00000010047	Hyal2	3.59971	3.54163	3.47043	3.62093	3.54243	3.49015	2.94723	2.95861	2.94414	2.97493	3.02265	2.97011	2.89261	2.97737	2.88436	2.8959	2.91512	2.9272	2.97191	3.00359	3.01335	3.07249	2.99541	3.0807	3.0979	3.14721	3.14644	3.22544	3.12349	3.1473	4.77962	4.65819	4.67554	4.68463	4.60952	4.59031	3.53726	3.55117	2.94999	2.98923	2.93499	2.89846	2.99628	3.04953	3.13052	3.16541	4.70445	4.62815
ENSMUSG00000010054	Tusc2	5.67279	5.61062	5.7215	5.5912	5.63625	5.46591	5.13455	5.3394	5.20257	5.12965	5.59206	5.29775	5.3035	5.34192	5.28092	5.32792	5.31732	5.38198	5.45282	5.10975	5.30324	5.25602	5.25555	5.18334	5.31546	5.17161	5.31413	5.26371	5.263	5.22294	6.27501	6.23833	6.33966	6.08706	6.18375	6.29067	5.66831	5.56445	5.22551	5.33982	5.32271	5.30872	5.2886	5.23164	5.26707	5.24988	6.28434	6.18716
ENSMUSG00000010057	Nprl2	7.0735	7.1177	7.14179	7.13103	7.11459	7.13259	6.64291	6.7298	6.67378	6.78233	6.48312	6.76229	6.73547	6.77657	6.76315	6.68008	6.78744	6.82271	6.90499	6.82283	6.78529	6.91363	6.85833	6.84152	7.20937	7.3545	7.22557	7.3565	7.2202	7.24723	8.08913	8.19797	8.16937	8.02948	8.10634	8.03147	7.111	7.12607	6.68217	6.67591	6.75602	6.74356	6.8377	6.87116	7.26315	7.27464	8.15216	8.05576
ENSMUSG00000010064	Slc38a3	NA	NA	NA	NA	NA	NA	2.48098	2.47184	2.5328	2.71469	2.5955	2.51546	NA	NA	NA	NA	NA	NA	NA	NA	NA	NA	NA	NA	2.17534	2.16925	2.15979	2.1773	2.22488	2.19764	3.90281	3.88564	4.02357	3.97277	3.96241	4.15348	NA	NA	2.49521	2.60855	NA	NA	NA	NA	2.16813	2.19994	3.93734	4.02955
ENSMUSG00000010066	Cacna2d2	5.36551	5.45304	5.53587	5.40049	5.47945	5.42204	5.18256	5.06091	5.01588	4.96167	5.31829	5.07481	5.0988	5.22547	5.03945	5.05549	5.1513	5.02644	5.25502	5.24796	5.65456	5.16053	5.2821	5.35103	5.39629	5.46918	5.35321	5.42034	5.6736	5.29793	6.10241	6.06166	6.11678	6.27375	6.19782	6.11192	5.45147	5.43399	5.08645	5.11826	5.16214	5.08208	5.38585	5.26455	5.40623	5.46396	6.09362	6.1945
ENSMUSG00000010067	Rassf1	4.64484	4.65556	4.54735	4.69679	4.63733	4.73398	4.62199	4.57631	4.58185	4.58952	4.399	4.70716	4.57091	4.72387	4.70489	4.69799	4.63329	4.56684	4.56599	4.53292	4.46427	4.48319	4.50314	4.49199	4.93828	4.97453	5.15197	5.07482	5.0243	5.11905	5.94608	6.06173	5.89532	5.94589	6.04934	5.89968	4.61592	4.68937	4.59339	4.56523	4.64739	4.67872	4.52106	4.49277	5.02159	5.07273	5.96771	5.96497
ENSMUSG00000010086	Rnf112	9.59248	9.5412	9.38967	9.54036	9.48674	9.23276	8.83518	9.27423	9.12254	8.70676	9.05308	9.04579	9.59672	9.45065	9.24033	9.26489	9.27311	9.4644	9.60929	9.3512	9.55479	9.54432	9.77643	9.39276	9.57755	9.88483	9.80624	9.80673	9.77847	9.58831	10.7954	10.9747	10.9525	10.7353	10.9073	10.8256	9.50778	9.41995	9.07732	8.93521	9.52368	9.25944	9.50509	9.57117	9.7562	9.7245	10.9075	10.8227
ENSMUSG00000010095	Slc3a2	8.34782	8.47038	8.30277	8.31653	8.38888	8.49195	8.25078	8.11514	8.02074	8.11061	7.8998	8.34558	7.94706	7.98619	7.95224	8.05485	8.05595	7.92495	8.04208	8.03757	8.03954	7.98276	7.99664	8.07357	8.53792	8.51707	8.5837	8.64644	8.44765	8.46558	9.37784	9.39311	9.31505	9.27409	9.27771	9.26006	8.37366	8.39912	8.12889	8.11866	7.96662	8.02101	8.03973	8.01766	8.54623	8.51989	9.362	9.27062
ENSMUSG00000010097	Nxf1	7.19437	7.14347	7.0048	7.12933	7.19689	7.06467	7.07527	6.94546	7.00194	7.28172	7.20699	7.03358	6.58228	6.7562	6.85551	6.75245	6.77487	6.60196	6.77898	6.74967	6.58717	6.63039	6.81409	6.74938	7.30973	7.39034	7.43526	7.38949	7.34262	7.3416	8.22701	8.26906	8.19246	8.20959	8.22532	8.25515	7.11421	7.1303	7.00756	7.1741	6.66924	6.79428	6.70527	6.73128	7.37845	7.35791	8.22951	8.23002
ENSMUSG00000010110	Stx5a	6.61664	6.70132	6.73078	6.78526	6.75445	6.87718	6.63126	6.63031	6.57588	6.52484	6.6805	6.668	6.31446	6.46002	6.37696	6.4651	6.3865	6.41505	6.45381	6.51786	6.30004	6.42229	6.51826	6.28452	7.00038	7.23392	7.06546	7.00958	7.0699	7.06117	7.78669	7.60229	7.82686	7.80426	7.93335	7.68026	6.68291	6.80563	6.61248	6.62445	6.38724	6.40952	6.4239	6.40835	7.09992	7.04688	7.73861	7.80596
ENSMUSG00000010154	Spire2	3.34285	3.32282	3.3497	3.29833	3.3059	3.27959	2.78806	2.74516	2.78406	2.79617	2.75555	2.82518	3.68189	3.63939	3.65358	3.61373	3.6763	3.64302	3.42326	3.34749	3.36745	3.39781	3.40944	3.43141	3.55633	3.535	3.5733	3.55632	3.59252	3.55422	4.20277	4.31905	4.25723	4.25824	4.23256	4.30499	3.33846	3.29461	2.77243	2.7923	3.66064	3.64787	3.3794	3.41289	3.55488	3.56769	4.25968	4.26526
ENSMUSG00000010175	Prox1	7.42536	7.33542	7.38654	7.3956	7.14158	7.20186	6.89505	7.1106	7.25003	6.86825	7.22639	7.11323	7.21551	7.21792	7.34705	7.10976	7.20335	7.01882	7.56071	7.45366	7.56503	7.50456	7.59428	7.25997	7.71469	7.87376	7.62193	7.73294	7.92041	7.80252	8.68455	8.88114	8.89507	9.31866	9.201	9.34299	7.38244	7.24635	7.08523	7.06929	7.21671	7.22005	7.52646	7.45294	7.73679	7.81862	8.82025	9.28755
ENSMUSG00000010277	2610507B11Rik	8.38646	8.3223	8.42969	8.38438	8.37074	8.02288	7.84664	7.68754	7.85395	7.62247	7.96791	7.6788	8.02442	8.05619	7.84719	7.87677	7.92971	8.08276	7.62767	7.69728	7.66185	7.86449	7.9268	7.91237	8.27944	8.38068	8.02156	8.26992	8.20606	8.24041	8.93646	8.97948	9.13876	9.30521	9.19431	9.4219	8.37948	8.25934	7.79604	7.75639	8.04031	7.88456	7.66227	7.90122	8.22723	8.2388	9.01823	9.30714
ENSMUSG00000010290	AI597479	6.53837	6.31809	6.59229	6.36517	6.38646	6.42366	6.20293	6.32491	6.22117	6.38297	6.2156	6.23513	6.0526	6.04865	5.99202	5.99734	5.92834	5.96838	5.9209	5.87634	6.03567	5.84059	5.8031	5.95245	6.46671	6.29813	6.30196	6.4187	6.34917	6.28826	7.28804	7.24355	7.1382	7.05809	7.06459	7.21831	6.48292	6.39176	6.24967	6.2779	6.05062	5.97257	5.9443	5.86538	6.3556	6.35204	7.22326	7.11366
ENSMUSG00000010307	Tmem86a	3.25257	3.27227	3.33889	3.2761	3.26521	3.22859	2.31821	2.30217	2.26204	2.26987	2.24935	2.33105	2.29185	2.33442	2.32002	2.34996	2.3217	2.3444	2.90999	2.82937	2.7973	2.80797	2.89372	2.85301	3.14369	3.07382	3.18224	3.15965	3.17088	3.11545	4.08072	4.12418	4.12533	4.07793	4.16717	4.12116	3.28791	3.25663	2.29414	2.28342	2.31314	2.33056	2.84555	2.85157	3.13325	3.14866	4.11008	4.12208
ENSMUSG00000010358	Ifi35	NA	NA	NA	NA	NA	NA	NA	NA	NA	NA	NA	NA	NA	NA	NA	NA	NA	NA	NA	NA	NA	NA	NA	NA	NA	NA	NA	NA	NA	NA	1.7316	1.69781	1.69382	1.71233	1.7466	1.69333	NA	NA	NA	NA	NA	NA	NA	NA	NA	NA	1.70775	1.71742
ENSMUSG00000010376	Nedd8	7.41922	7.18246	7.05735	7.14908	7.24528	7.09947	6.54191	6.72741	6.40361	6.43386	6.3061	6.45931	7.0662	6.85435	6.88505	6.79763	6.9087	7.26124	6.9457	6.76159	6.94897	7.02711	6.96109	7.17764	7.1102	6.91991	6.6649	6.75056	6.79864	6.7097	7.76349	7.58399	7.48905	7.69969	7.59817	7.66877	7.21968	7.16461	6.55764	6.39975	6.96027	6.86379	6.88542	7.05528	6.89834	6.75296	7.61218	7.65555
ENSMUSG00000010392	Gosr1	6.69091	6.60001	6.62585	6.60513	6.56539	6.53374	6.43184	6.21694	6.11886	6.0656	6.18312	6.12676	6.22537	6.22572	6.20298	6.00276	6.10886	6.01441	6.20082	6.20127	6.38019	6.40342	6.1383	6.33242	6.58009	6.5693	6.54866	6.48817	6.59019	6.56657	7.59425	7.60742	7.52995	7.60884	7.44649	7.60589	6.63892	6.56808	6.25588	6.12516	6.22554	6.10487	6.26076	6.29138	6.56602	6.54831	7.57721	7.55374
ENSMUSG00000010406	Mrpl52	6.31933	6.11814	6.30087	6.16144	6.33553	6.28324	5.85101	5.80239	5.89642	5.91786	5.9365	5.89617	5.87191	6.02904	5.80835	5.88378	5.7454	6.0155	5.97843	5.81055	5.98547	5.84057	5.89445	5.92114	6.14613	6.07224	5.97345	5.99951	6.07511	6.09551	6.9964	7.03422	7.12528	7.12046	6.96391	7.02217	6.24611	6.26007	5.84994	5.91684	5.95048	5.81251	5.92482	5.88538	6.06394	6.05671	7.05197	7.03552
ENSMUSG00000010453	Kansl3	6.48759	6.62786	6.65428	6.5753	6.46128	6.66367	6.42547	6.10299	6.14473	6.48578	6.30818	6.23387	6.18719	6.08389	6.09225	6.14047	6.19442	6.02127	6.19422	6.11037	6.12208	6.10897	6.1916	6.30575	6.77303	6.76227	6.7345	6.65354	6.78829	6.68277	7.73802	7.72606	7.58289	7.61702	7.48955	7.59937	6.58991	6.56675	6.2244	6.34261	6.13554	6.14238	6.14222	6.20211	6.7566	6.7082	7.68232	7.56865
ENSMUSG00000010505	Myt1	4.34186	4.34638	4.30164	4.31114	4.30143	4.36833	3.94817	4.00526	3.91727	4.00921	4.0472	3.92562	4.33731	4.30557	4.38458	4.38612	4.38537	4.35908	4.02532	4.02437	4.14656	4.01244	4.05983	4.06421	4.91485	4.88816	4.97428	4.97597	4.9374	4.89405	5.88963	5.9169	5.7787	5.87378	5.86905	5.83469	4.32996	4.32696	3.9569	3.99401	4.32144	4.38536	4.06541	4.04549	4.92577	4.93581	5.86174	5.85917
ENSMUSG00000010517	Faf1	7.5306	7.46827	7.56765	7.49657	7.56331	7.56468	7.24127	7.30711	7.33502	7.06048	7.32009	7.30561	7.18613	7.16791	7.24394	7.146	7.25402	7.1333	7.34639	7.19309	7.31828	7.08852	7.18495	7.27752	7.71394	7.75054	7.63276	7.66823	7.69749	7.6903	8.35939	8.37068	8.5534	8.37067	8.3807	8.33316	7.52217	7.54152	7.29447	7.22873	7.17702	7.21465	7.28592	7.18366	7.69908	7.68534	8.42782	8.36151
ENSMUSG00000010538	Tsacc	NA	NA	NA	NA	NA	NA	NA	NA	NA	NA	NA	NA	NA	NA	NA	NA	NA	NA	NA	NA	NA	NA	NA	NA	NA	NA	NA	NA	NA	NA	2.35661	2.42296	2.39397	2.388	2.46227	2.37311	NA	NA	NA	NA	NA	NA	NA	NA	NA	NA	2.39118	2.40779
ENSMUSG00000010554	Mettl16	6.46111	6.54044	6.67362	6.3662	6.50484	6.55217	6.58895	6.36087	6.4208	6.73203	6.5449	6.30769	6.40354	6.22017	6.26203	6.36304	6.3449	6.31271	5.96391	6.1671	5.99062	5.87391	5.93796	5.85399	6.61846	6.60414	6.63818	6.47891	6.55928	6.69164	7.43337	7.63242	7.46693	7.38513	7.33474	7.4057	6.55839	6.47441	6.45687	6.52821	6.31185	6.32332	6.04055	5.88862	6.62026	6.57661	7.51091	7.37519
ENSMUSG00000010592	Dazl	3.16547	3.14675	3.2193	3.18965	3.20137	3.15238	3.66917	3.68135	3.703	3.71924	3.83224	3.66108	3.00299	3.00458	2.99881	3.03918	3.03987	3.00237	2.90203	2.80473	2.86718	2.87354	2.86847	2.81946	4.00662	4.03746	3.97816	4.15126	4.09983	4.05202	4.22033	4.19778	4.25798	4.20241	4.21791	4.24441	3.17717	3.18113	3.68451	3.73752	3.00379	3.02595	2.85798	2.85382	4.00742	4.10104	4.22536	4.22157
ENSMUSG00000010607	Pigyl	4.57863	4.60872	4.70761	4.71287	4.57704	4.57301	4.09852	4.29591	4.22537	4.12603	4.15369	4.37216	4.33503	4.35275	4.34194	4.31072	4.342	4.36889	3.83926	3.99573	3.96984	3.94395	3.91307	3.99202	4.48329	4.52635	4.55484	4.48163	4.48829	4.44705	5.55022	5.52638	5.57335	5.58068	5.56001	5.60028	4.63165	4.62097	4.2066	4.21729	4.34389	4.33155	3.93494	3.94968	4.5215	4.47233	5.54998	5.58032
ENSMUSG00000010608	Rbm25	8.82583	8.83477	8.86613	8.80477	8.78329	8.91432	8.48723	8.60464	8.5414	8.62857	8.37212	8.51823	8.41571	8.4936	8.48575	8.32798	8.4911	8.51594	8.32764	8.37895	8.28292	8.23136	8.19708	8.26389	8.91878	8.84604	8.91293	8.77484	8.81601	8.89649	9.73705	9.48701	9.4478	9.69909	9.47438	9.51983	8.84224	8.83413	8.54442	8.50631	8.45466	8.43494	8.32984	8.23078	8.89258	8.82911	9.55729	9.56443
ENSMUSG00000010609	Psen2	4.95323	5.02634	4.89248	5.01096	5.05192	4.95311	4.41977	4.47363	4.37043	4.3286	4.54489	4.52624	4.64632	4.64283	4.64347	4.62291	4.60017	4.6074	4.63226	4.66175	4.69331	4.6263	4.56393	4.67858	4.94373	4.93053	4.95714	4.96021	4.94617	4.91066	5.74495	5.7377	5.76017	5.63307	5.6025	5.68643	4.95735	5.00533	4.42127	4.46658	4.64458	4.62218	4.66244	4.62294	4.9438	4.93901	5.74761	5.64067
ENSMUSG00000010660	Plcd1	2.56428	2.55994	2.53281	2.54664	2.51103	2.5657	2.46837	2.39609	2.41952	2.39268	2.37261	2.44475	2.05079	2.01144	2.04645	2.03344	2.03024	2.03201	2.71302	2.68955	2.6995	2.65823	2.67636	2.69536	3.12057	3.1144	3.00885	3.0648	3.07486	3.05221	3.60851	3.63118	3.6108	3.65176	3.60738	3.58909	2.55234	2.54112	2.42799	2.40335	2.03111	2.03671	2.70069	2.67665	3.08127	3.06396	3.61683	3.61608
ENSMUSG00000010663	Fads1	6.53955	6.49264	6.59327	6.58222	6.53867	6.43048	6.23433	6.23959	6.19747	6.30375	6.28986	6.44533	5.93322	6.02469	5.95878	5.99447	6.02393	5.8893	6.30161	6.25644	6.23313	6.17194	6.40661	6.37222	6.62253	6.64596	6.54231	6.50324	6.52003	6.55963	7.49928	7.71901	7.68304	7.65552	7.72043	7.75744	6.54182	6.51712	6.2238	6.34631	5.97895	5.99239	6.26373	6.31692	6.6036	6.52763	7.63378	7.71113
ENSMUSG00000010721	Lmbr1	6.73523	6.64914	6.70385	6.69296	6.72678	6.88139	6.50834	6.50677	6.74451	6.90135	6.47818	6.72268	6.39362	6.3539	6.33403	6.37475	6.38002	6.31008	5.84262	5.94827	5.90582	5.89171	5.84121	5.93139	6.6994	6.63815	6.75142	6.63794	6.64831	6.72235	7.48277	7.55254	7.43248	7.32994	7.39865	7.40942	6.69608	6.76704	6.58654	6.70074	6.37376	6.36294	5.8989	5.88811	6.69632	6.66953	7.48926	7.37934
ENSMUSG00000010755	Cars	6.86616	6.93285	7.05539	7.03766	7.07166	6.99982	6.51734	6.63996	6.66024	6.58625	6.42985	6.58961	6.78268	6.7592	6.76496	6.7382	6.91312	6.78226	6.88124	6.76158	6.82073	6.74912	6.80205	6.80695	7.31272	7.30822	7.13531	7.14893	7.26382	7.24412	8.15974	7.92502	8.08189	7.97973	7.926	7.91564	6.95147	7.03638	6.60585	6.53524	6.77094	6.80543	6.82118	6.78604	7.25208	7.21896	8.05555	7.94046
ENSMUSG00000010797	Wnt2	4.96166	4.99582	4.77128	4.9301	4.96675	4.8237	4.70808	4.68843	4.62084	4.76138	4.572	4.56257	4.56477	4.59117	4.59083	4.62072	4.49062	4.538	4.30665	4.21137	4.2569	4.25527	4.33556	4.1429	4.82708	4.8292	4.84815	5.04798	4.83683	4.86186	6.12464	5.96264	5.91123	6.10663	6.20582	6.11026	4.90959	4.90685	4.67245	4.63198	4.57797	4.56739	4.25831	4.24458	4.83481	4.91556	5.9995	6.1409
ENSMUSG00000010803	Gabra1	11.8627	11.8563	12.1043	11.956	11.9382	12.0833	11.7333	11.7076	11.812	11.613	11.841	12.0255	11.4326	11.481	11.4571	11.563	11.4201	11.2465	11.4312	11.4641	11.3332	11.3459	11.1493	11.2943	12.3048	11.9948	12.0515	12.0603	11.9781	12.0476	12.8616	12.6498	12.7536	12.5938	12.3764	12.4847	11.9411	11.9925	11.751	11.8265	11.4568	11.4801	11.4095	11.2632	12.117	12.0287	12.755	12.485
ENSMUSG00000010911	Apip	4.72232	4.6946	4.74793	4.70649	4.77495	4.66712	4.49905	4.57914	4.4715	4.51288	4.40354	4.48043	4.4234	4.43673	4.49806	4.39514	4.45418	4.42858	4.28538	4.25831	4.19549	4.23774	4.24215	4.23803	5.09985	5.19979	5.05407	5.08463	5.13803	5.04092	5.89283	5.87379	5.91489	5.95384	5.97879	5.82662	4.72162	4.71618	4.51657	4.46562	4.43007	4.44913	4.24639	4.23931	5.1179	5.08786	5.89384	5.91975
ENSMUSG00000010914	Pdhx	7.63534	7.53304	7.59655	7.50361	7.52157	7.63558	7.42085	7.36037	7.4208	7.54139	7.16505	7.34715	7.2406	7.26013	7.23476	7.31432	7.25217	7.35503	7.23247	7.26346	7.24826	7.25038	7.24385	7.10926	7.7645	7.82481	7.86141	7.80092	7.73073	7.8112	8.71769	8.67824	8.63393	8.7853	8.65796	8.78701	7.58831	7.55359	7.40067	7.3512	7.25036	7.26708	7.24806	7.20116	7.81691	7.78095	8.67662	8.74342
ENSMUSG00000010936	Vac14	5.98319	6.02763	5.96943	6.00972	5.93343	5.95296	5.85589	5.77862	5.8	5.61677	5.90708	5.94889	5.55679	5.63276	5.51389	5.59672	5.51734	5.61452	5.80234	5.72785	5.82278	5.70534	5.6682	5.81114	6.23843	6.24932	6.22276	6.15176	6.37753	6.18609	7.19949	7.10633	7.20452	7.10863	7.12925	6.89544	5.99342	5.96537	5.8115	5.82425	5.59477	5.54265	5.78433	5.72823	6.23684	6.23846	7.17011	7.04444
ENSMUSG00000011096	Akt1s1	4.98668	4.88837	4.84858	4.9857	5.02598	4.75268	4.76184	4.66539	4.64256	4.65058	4.91937	4.75631	4.6877	4.70754	4.65683	4.64017	4.65332	4.6966	4.91197	4.82417	4.83265	4.92422	5.02402	4.97978	4.8781	4.78766	4.87474	4.8967	4.86375	4.81544	5.97338	5.86689	5.94543	5.96027	5.98616	5.84305	4.90788	4.92145	4.68993	4.77542	4.69762	4.65011	4.85627	4.97601	4.84684	4.85863	5.92857	5.92983
ENSMUSG00000011114	Tbrg1	8.07642	8.12341	8.2294	8.09988	8.12949	8.19408	7.95699	8.09043	8.04451	7.94092	8.14113	8.14245	7.67523	7.7898	7.80742	7.63303	7.7894	7.76332	7.86074	7.70314	7.77865	7.71658	7.60895	7.61905	8.61137	8.42717	8.48786	8.32638	8.55494	8.37676	9.55524	9.17042	9.22102	9.33359	9.14888	9.1643	8.14308	8.14115	8.03065	8.07483	7.73252	7.74328	7.78084	7.64819	8.5088	8.41936	9.31556	9.21559
ENSMUSG00000011148	Adssl1	NA	NA	NA	NA	NA	NA	2.41249	2.41314	2.4395	2.40044	2.62464	2.45617	NA	NA	NA	NA	NA	NA	NA	NA	NA	NA	NA	NA	2.38714	2.36182	2.3717	2.35704	2.37122	2.36424	3.35068	3.43819	3.3997	3.39352	3.40752	3.41579	NA	NA	2.42171	2.49375	NA	NA	NA	NA	2.37355	2.36417	3.39619	3.40561
ENSMUSG00000011158	Brf1	6.84608	6.84215	6.79439	6.90019	6.80979	6.84347	6.60995	6.52219	6.50516	6.49828	6.30827	6.44645	6.58764	6.51871	6.48559	6.51353	6.58852	6.43529	6.34347	6.37049	6.46819	6.45467	6.33361	6.38397	6.94501	6.78321	6.74926	6.82133	6.75587	6.8552	7.84738	7.71957	7.77751	7.76097	7.62816	7.82722	6.82754	6.85115	6.54577	6.41767	6.55318	6.52921	6.39405	6.39075	6.82583	6.8108	7.78149	7.73878
ENSMUSG00000011179	Odc1	5.03827	4.99261	5.02478	5.05963	5.02553	5.00209	4.57581	4.61824	4.70138	4.5423	4.75947	4.59891	4.4344	4.48674	4.428	4.54132	4.51116	4.49097	4.28049	4.2961	4.24343	4.23821	4.27792	4.26513	4.90877	4.88609	4.91761	4.97447	4.84273	4.95981	5.8583	5.94189	5.91155	6.11483	6.24536	5.97961	5.01855	5.02908	4.63181	4.63356	4.46057	4.49349	4.27334	4.26042	4.90416	4.92567	5.90391	6.11327
ENSMUSG00000011254	Thg1l	4.18705	4.07457	4.10975	4.08437	4.11949	4.12753	4.03587	3.97217	4.01152	3.9288	4.03718	3.98556	4.14334	4.10865	4.11055	4.04382	4.11769	4.08738	3.83132	3.92716	3.89976	3.91959	3.95134	3.89006	4.42288	4.43323	4.41458	4.50055	4.45146	4.4377	5.21521	5.33229	5.27422	5.30546	5.35857	5.24287	4.12379	4.11046	4.00652	3.98385	4.12599	4.09069	3.88608	3.92033	4.42356	4.46323	5.27391	5.3023
ENSMUSG00000011256	Adam19	4.29767	4.22607	4.22646	4.23335	4.13266	4.25867	4.21592	4.11425	4.09788	4.12145	4.10329	4.11042	3.93065	3.96456	3.92908	3.9841	4.036	3.93662	3.83043	3.71215	3.68261	3.6939	3.7685	3.71984	3.95903	3.95589	3.97079	3.9586	3.99896	3.94095	5.07761	5.07844	4.99884	4.99628	5.13574	4.9842	4.25007	4.20823	4.14268	4.11172	3.9476	3.98306	3.74173	3.72741	3.9619	3.96617	5.05163	5.03874
ENSMUSG00000011257	Pabpc4	3.41203	3.40808	3.44101	3.40272	3.37959	3.53497	3.54493	3.47965	3.58754	3.77802	3.57953	3.57108	2.98537	3.03243	3.02145	3.01387	2.95917	2.96574	3.11142	3.07273	3.19744	3.05286	3.10814	3.10941	3.75903	3.84071	3.87168	3.77486	3.77038	3.852	4.3463	4.38644	4.36796	4.43487	4.43764	4.34566	3.42037	3.43909	3.53737	3.64288	3.0089	2.99816	3.1272	3.09014	3.82381	3.79908	4.3669	4.40606
ENSMUSG00000011306	Sugp1	7.1384	7.11616	6.97786	7.00379	7.13218	6.9506	6.81736	6.7929	6.69451	6.67476	6.71978	6.8416	6.96721	6.75561	6.76684	6.72343	6.69217	6.9627	6.96315	6.82923	6.79132	6.90477	6.89966	6.90526	7.2362	7.16385	7.30665	7.18818	7.19691	7.13151	7.82969	7.89103	7.95218	7.87964	7.94461	7.93063	7.07747	7.02885	6.76826	6.74538	6.86141	6.72748	6.86123	6.90323	7.23557	7.1722	7.89097	7.91829
ENSMUSG00000011382	Dhdh	2.54584	2.55404	2.55898	2.53089	2.55102	2.50143	NA	NA	NA	NA	NA	NA	NA	NA	NA	NA	NA	NA	2.36068	2.4275	2.41792	2.36754	2.33387	2.39053	2.42927	2.42526	2.51554	2.48113	2.4256	2.41833	3.42069	3.46257	3.42774	3.48438	3.44056	3.47237	2.55295	2.52778	NA	NA	NA	NA	2.40203	2.36398	2.45669	2.44168	3.437	3.46577
ENSMUSG00000011427	Zfp790	5.36572	5.40662	5.30916	5.36819	5.27468	5.35554	4.79872	4.70984	4.75122	4.70128	4.69838	4.75146	5.12793	5.13798	5.17499	5.12064	5.20209	5.21697	4.7286	4.80733	4.66462	4.84207	4.78593	4.80087	5.28004	5.22426	5.13783	5.22011	5.13565	5.23803	6.37041	6.35913	6.33679	6.54306	6.32104	6.41016	5.3605	5.33281	4.75326	4.71704	5.13295	5.16591	4.73351	4.80962	5.21405	5.19793	6.35544	6.42475
ENSMUSG00000011589	Fsd1	6.78665	6.7703	6.7429	6.83332	6.89028	6.79605	6.49394	6.56069	6.73204	6.57092	6.62801	6.71715	6.36609	6.5472	6.44604	6.55181	6.46413	6.55686	6.47777	6.54206	6.47593	6.47108	6.41866	6.63897	7.23929	7.14312	7.14425	7.16455	7.05273	6.97101	7.94035	7.86112	7.89076	7.92664	7.90618	7.73788	6.76662	6.83988	6.59555	6.63869	6.45664	6.48732	6.49859	6.50957	7.17555	7.06276	7.89741	7.8569
ENSMUSG00000011658	Fuz	3.78734	3.77878	3.84932	3.71588	3.77281	3.80736	3.28215	3.35445	3.30018	3.36705	3.33734	3.34987	2.90141	2.90439	2.93356	2.94611	2.90789	2.95463	3.66557	3.64435	3.60523	3.70059	3.68343	3.65265	3.54533	3.52711	3.5898	3.66203	3.54645	3.53453	4.7029	4.67851	4.83896	4.71416	4.74841	4.70954	3.80515	3.76535	3.31226	3.35142	2.9029	2.92919	3.63838	3.67889	3.55408	3.581	4.74012	4.72404
ENSMUSG00000011751	Sptbn4	7.32994	7.2912	6.96774	7.24213	7.19961	6.94068	6.47899	6.63474	6.51783	6.39219	6.33715	6.42593	6.94272	6.84242	6.80165	6.85125	6.88076	6.99831	6.95142	6.92843	6.69957	7.1497	7.15886	7.14104	7.19094	7.32428	7.18342	7.1916	7.07819	7.00984	8.18761	8.19311	8.27913	8.11105	8.1629	8.13001	7.19629	7.12747	6.54385	6.38509	6.89257	6.84455	6.85981	7.14986	7.23288	7.09321	8.21995	8.13465
ENSMUSG00000011831	Evi5	5.61885	5.64769	5.78666	5.58078	5.70955	5.76713	5.73714	5.67016	5.77055	5.84002	5.95739	5.68698	5.61599	5.60678	5.60146	5.50146	5.60964	5.58439	5.2054	5.16046	5.19792	5.28256	5.13332	5.15434	5.93192	5.8615	5.87786	5.76832	5.82392	5.88611	6.82769	6.64916	6.72318	6.72572	6.80079	6.83566	5.6844	5.68582	5.72595	5.82813	5.61138	5.57085	5.18793	5.19007	5.89043	5.82612	6.73334	6.78739
ENSMUSG00000011832	Evi5l	7.08713	7.01069	7.04471	6.97044	7.03604	6.86347	6.36865	6.18023	6.1862	6.32935	6.00479	6.17849	6.7834	6.5907	6.75461	6.74208	6.77015	6.78994	6.48087	6.45794	6.51536	6.56643	6.46841	6.72169	6.7408	6.79001	6.77949	6.64351	6.74801	6.76274	7.74886	7.80928	7.82762	7.68309	7.73731	7.79612	7.04751	6.95665	6.24503	6.17088	6.68705	6.75561	6.48472	6.58551	6.7701	6.71808	7.79525	7.73884
ENSMUSG00000011837	Snapc2	5.76427	5.61	5.60318	5.71284	5.75686	5.52242	5.02619	4.9112	4.93412	4.94574	4.72495	4.98185	5.39046	5.37092	5.37255	5.40068	5.38225	5.30681	5.06649	5.17505	5.05883	5.2116	5.11443	5.27087	5.41645	5.44657	5.59146	5.53832	5.58819	5.39036	6.10971	6.42565	6.26594	6.14681	6.28419	6.22816	5.65915	5.66404	4.95717	4.88418	5.38069	5.38516	5.10012	5.19897	5.48482	5.50562	6.2671	6.21972
ENSMUSG00000011877	Git1	9.47127	9.46837	9.30412	9.56496	9.56353	8.96026	8.86966	8.5169	8.67452	8.69704	8.78187	8.38483	9.21607	9.18555	8.74766	8.95927	8.86536	8.97707	8.62727	8.75465	8.63348	8.99344	9.01474	8.91832	9.18343	9.36438	8.83578	9.08917	8.95768	8.92946	9.86456	10.0691	9.96912	10.1925	10.1655	10.2862	9.41459	9.36292	8.68702	8.62125	9.20081	8.85743	8.6718	8.9755	9.12786	8.9921	9.9676	10.2147
ENSMUSG00000011884	Gltp	3.1838	3.13901	3.15403	3.16251	3.17616	3.14422	2.35747	2.37492	2.41278	2.34415	2.47049	2.41366	2.64199	2.67224	2.65174	2.66427	2.71434	2.68538	NA	NA	NA	NA	NA	NA	2.28329	2.26577	2.26499	2.26071	2.2536	2.28967	3.40683	3.40847	3.39069	3.35579	3.42216	3.4259	3.15895	3.16096	2.38173	2.40943	2.65711	2.67678	NA	NA	2.27135	2.26799	3.40199	3.40128
ENSMUSG00000011958	Bnip2	4.92836	5.00894	5.08295	5.0671	5.0015	5.0026	4.49073	4.50049	4.57566	4.57566	4.42222	4.50982	4.83612	4.70241	4.7732	4.68641	4.71409	4.71846	4.69114	4.76546	4.72644	4.69675	4.62636	4.58778	5.05038	4.85407	5.02805	4.96041	5.03398	4.98945	5.92702	5.89882	5.89101	6.04725	5.8614	6.02163	5.00675	5.02374	4.52229	4.50257	4.76927	4.72457	4.72768	4.63696	4.9775	4.99461	5.90562	5.97676
ENSMUSG00000011960	Ccnt1	7.10897	7.0495	7.19711	7.08272	7.13912	7.1531	6.93013	6.85708	6.95323	7.09583	7.3039	6.8956	6.68887	6.80623	6.84535	6.80651	6.9148	6.84285	6.63621	6.65507	6.62578	6.69375	6.56324	6.64392	7.35194	7.61497	7.49082	7.47038	7.41072	7.56755	8.55479	8.29	8.50662	8.62119	8.54337	8.60257	7.11853	7.12498	6.91348	7.09844	6.74755	6.85555	6.63902	6.63363	7.48591	7.48288	8.45047	8.58904
ENSMUSG00000012076	Brms1l	7.79432	7.766	7.75581	7.69847	7.75857	7.81646	7.42403	7.43254	7.27621	7.31207	7.56072	7.35738	7.62949	7.31474	7.52994	7.24979	7.37236	7.37751	7.42054	7.26415	7.34724	7.25389	7.13747	7.36594	7.73401	7.58141	7.55596	7.62752	7.53017	7.56169	8.39718	8.43673	8.40667	8.4152	8.25215	8.39378	7.77205	7.75783	7.37759	7.41006	7.47211	7.38403	7.34398	7.25244	7.62379	7.57312	8.41353	8.35371
ENSMUSG00000012114	Med15	7.31744	7.1139	7.00752	7.21263	7.14077	7.05038	6.76146	6.95544	6.83698	6.91966	6.6456	6.90651	6.85128	6.8826	6.93972	6.82212	6.86864	6.82789	7.18291	7.07359	7.07314	7.06326	7.10042	7.19202	7.25235	7.37334	7.32044	7.32225	7.36942	7.22635	8.19071	8.36595	8.24999	8.50825	8.52262	8.49523	7.14629	7.13459	6.85129	6.82392	6.86694	6.87683	7.10988	7.11857	7.31537	7.30601	8.26888	8.5087
ENSMUSG00000012117	Dhdds	7.13718	7.27254	7.14073	7.18106	7.10988	7.00978	6.70589	6.77427	6.68335	6.73819	6.84115	6.84291	6.81782	6.75114	6.77005	6.81983	6.65539	6.76592	6.7604	6.68189	6.75292	6.73889	6.7163	6.84097	7.2885	7.24107	7.22769	7.31454	7.31437	7.20035	8.21955	8.1807	8.30948	8.22516	8.16781	8.1376	7.18348	7.10024	6.72117	6.80741	6.78448	6.74842	6.73174	6.76539	7.25242	7.27642	8.23657	8.17686
ENSMUSG00000012126	Ubxn11	2.41563	2.36952	2.3863	2.3568	2.3586	2.38644	2.47464	2.4417	2.39339	2.46302	2.39099	2.45042	2.12032	2.13593	2.09903	2.10881	2.10603	2.15515	2.52029	2.59783	2.55751	2.613	2.60532	2.59417	2.15501	2.21109	2.14798	2.18117	2.13623	2.20211	2.95273	2.9593	2.90147	2.96198	2.99822	2.97841	2.39049	2.36728	2.43658	2.43481	2.12813	2.10462	2.55854	2.60416	2.17136	2.17317	2.93783	2.97954
ENSMUSG00000012296	Tjap1	3.12634	3.14145	3.10797	3.08955	3.1242	3.08028	NA	NA	NA	NA	NA	NA	2.57744	2.40877	2.47008	2.40318	2.43896	2.46425	2.89272	2.87088	2.86033	2.91957	2.95125	2.86183	2.62936	2.61935	2.61488	2.61741	2.64701	2.60456	3.75908	3.75881	3.70066	3.78621	3.78872	3.73635	3.12525	3.09801	NA	NA	2.49311	2.43741	2.87464	2.91089	2.6212	2.62299	3.73952	3.77043
ENSMUSG00000012422	Tmem167	6.1965	6.20742	6.19406	6.20427	6.15966	6.18924	6.07623	5.98246	6.14361	6.15984	5.88694	6.22147	5.63438	5.71373	5.70635	5.65603	5.66946	5.62437	5.42825	5.56894	5.58884	5.6691	5.57882	5.53794	6.26521	6.07651	6.24575	6.19572	6.15088	6.19034	7.11534	7.23277	7.24518	7.06786	7.29614	7.23608	6.19933	6.18439	6.06743	6.08941	5.67406	5.67728	5.52868	5.59529	6.19582	6.17898	7.19776	7.20003
ENSMUSG00000012429	Mplkip	3.72744	3.66214	3.68595	3.69258	3.73072	3.74491	3.0246	3.12886	3.12395	3.10854	3.04509	3.07548	2.5931	2.6319	2.65361	2.59923	2.65124	2.59912	2.0198	2.02549	2.03583	2.04389	2.05641	2.09977	3.64353	3.75676	3.71535	3.67969	3.68334	3.68247	4.121	4.10271	4.09698	4.17712	4.09033	4.16476	3.69184	3.72274	3.09247	3.07637	2.6125	2.6347	2.02704	2.06669	3.70521	3.68183	4.1069	4.14407
ENSMUSG00000012443	Kif11	3.26804	3.26256	3.45937	3.30812	3.25034	3.35615	2.50598	2.50452	2.57531	2.47735	2.66749	2.48582	NA	NA	NA	NA	NA	NA	NA	NA	NA	NA	NA	NA	3.11243	3.10419	3.06088	3.19486	3.08301	3.14331	3.67597	3.60639	3.60564	3.62986	3.66916	3.60311	3.32999	3.30487	2.52861	2.54356	NA	NA	NA	NA	3.0925	3.14039	3.62933	3.63404
ENSMUSG00000012483	Rpa3	4.52347	4.66372	4.57656	4.59658	4.55181	4.6127	4.98736	4.82921	4.91498	4.94079	5.02443	4.94318	4.20141	4.2451	4.1837	4.29079	4.28247	4.15295	3.7652	3.74313	3.80656	3.72927	3.7252	3.65376	5.01885	5.0046	5.05749	4.95664	5.12092	5.09695	5.80558	5.64412	5.81198	5.7576	5.84906	5.70163	4.58792	4.58703	4.91052	4.96947	4.22325	4.25232	3.77163	3.70274	5.02698	5.05817	5.75389	5.76943
ENSMUSG00000012535	Tnpo3	8.14178	8.19459	8.1737	8.26677	8.30739	8.10033	7.86537	7.76978	7.93889	7.81793	7.72046	7.74815	7.83009	7.86527	7.83128	7.87916	7.85395	7.82729	7.59046	7.81168	7.71122	7.66296	7.7748	7.69163	8.29268	8.41354	8.34316	8.33732	8.24092	8.4359	9.15231	9.19617	9.21436	9.28624	9.16259	9.27974	8.17002	8.22483	7.85801	7.76218	7.84768	7.8548	7.70445	7.7098	8.34979	8.33805	9.18761	9.24286
ENSMUSG00000012609	Ttll5	4.8146	4.75429	4.86491	4.77397	4.80496	4.73458	4.19503	4.33436	4.24705	4.3948	4.26781	4.23573	4.34369	4.26924	4.22359	4.22417	4.2427	4.26406	4.16949	4.08995	4.17066	4.1597	4.10749	4.15174	4.79002	4.74648	4.73336	4.77225	4.64596	4.73949	5.52789	5.66857	5.52732	5.59953	5.61637	5.68607	4.81127	4.77117	4.25881	4.29944	4.30647	4.23015	4.14337	4.13964	4.75662	4.71923	5.57459	5.63399
ENSMUSG00000012640	Zfp715	6.95593	7.06182	6.8815	7.08973	6.94929	7.05755	6.94585	6.83329	7.04721	6.9272	6.89062	6.71451	6.98094	6.80551	6.99413	7.02	6.96707	6.82154	6.57966	6.80665	6.49077	6.76171	6.60028	6.58182	7.27313	7.4434	7.31584	7.3919	7.30132	7.70852	8.40312	8.19379	8.30469	8.71271	8.78227	8.55009	6.96642	7.03219	6.94212	6.84411	6.89322	6.99373	6.62569	6.64794	7.34412	7.46725	8.30053	8.68169
ENSMUSG00000012819	Cdh23	3.74744	3.83647	3.61643	3.65643	3.69125	3.75335	3.70552	3.54846	3.54682	3.60043	3.54075	3.71359	3.27621	3.19696	3.19833	3.28201	3.23356	3.24106	3.04301	3.04525	2.99542	3.00861	3.02368	3.10087	4.22075	3.94724	4.10142	3.94084	3.97235	3.95965	4.06072	3.90545	3.89618	3.87394	3.89423	3.86395	3.73345	3.70034	3.60027	3.61826	3.23659	3.23797	3.02789	3.04439	4.08981	3.95762	3.95412	3.87737
ENSMUSG00000012848	Rps5	8.49496	8.69696	8.47429	8.6729	8.60152	8.57531	8.59815	8.43779	8.48977	8.52352	8.59361	8.44275	8.32513	8.41465	8.43921	8.49318	8.53657	8.25146	8.25654	8.3503	8.23849	8.31686	8.30629	8.1245	8.35897	8.63917	8.60105	8.54195	8.50074	8.6704	9.31437	9.77008	9.55419	9.60216	9.69655	9.64327	8.5554	8.61658	8.50857	8.51996	8.36989	8.48965	8.28178	8.24922	8.53306	8.57103	9.54621	9.64733
ENSMUSG00000013033	Adgrl1	10.1842	10.0468	9.93815	10.069	10.055	9.95185	9.77767	9.49263	9.58749	9.68266	9.70395	9.55952	9.77341	9.73848	9.54167	9.74654	9.63388	9.7459	9.51485	9.54512	9.66081	9.61996	9.74683	9.7548	10.1372	10.1932	9.84613	10.0582	10.194	9.91389	10.928	10.8657	10.8973	11.0747	11.0676	10.8719	10.0564	10.0253	9.61926	9.64871	9.75594	9.6407	9.57359	9.7072	10.0589	10.0554	10.897	11.0047
ENSMUSG00000013076	Amotl1	1.81541	1.81488	1.84657	1.82313	1.8108	1.8431	2.21491	2.23173	2.19069	2.2883	2.18878	2.25452	NA	NA	NA	NA	NA	NA	1.67536	1.69812	1.7377	1.6812	1.69369	1.76357	2.01176	2.01794	2.02901	1.98109	2.0502	1.99849	2.57172	2.59369	2.66579	2.6518	2.60198	2.57614	1.82562	1.82567	2.21244	2.24387	NA	NA	1.70373	1.71282	2.01957	2.00993	2.6104	2.60998
ENSMUSG00000013089	Etv5	6.94769	6.94937	6.80072	7.02441	6.99466	6.79175	6.70778	6.53825	6.51276	6.66958	6.51755	6.57842	6.95305	6.68658	6.67335	6.77858	6.74863	6.61456	6.57481	6.47038	6.51258	6.52647	6.55359	6.75179	6.94452	7.0262	6.89986	6.95894	6.99112	6.92112	7.72606	7.86674	7.77773	7.65404	7.67264	7.69813	6.89926	6.93694	6.58626	6.58851	6.81981	6.73352	6.51926	6.61062	6.95686	6.95706	7.79018	7.67494
ENSMUSG00000013150	Gfod2	4.5174	4.38736	4.42543	4.31689	4.34936	4.3173	3.80157	3.71121	3.74307	3.77825	3.80849	3.81073	3.81534	3.77585	3.81306	3.77625	3.79027	3.7916	3.94193	3.91725	3.85167	3.92893	3.89124	3.88191	3.88886	3.93268	3.87239	3.91053	3.96158	3.90442	4.91265	4.95216	4.95261	4.87614	4.97085	4.97791	4.4434	4.32785	3.75195	3.79916	3.79559	3.79319	3.90361	3.90069	3.89797	3.92551	4.93914	4.94163
ENSMUSG00000013155	Enkd1	3.64149	3.61637	3.62548	3.65414	3.60934	3.61024	3.27877	3.2795	3.24114	3.26593	3.28611	3.31471	3.58386	3.57925	3.56073	3.60975	3.60046	3.62592	3.99195	3.93	3.97799	4.02868	4.11322	3.9765	3.77162	3.63571	3.74819	3.63957	3.7273	3.66223	4.58584	4.61081	4.6317	4.60969	4.56176	4.52212	3.62778	3.62457	3.26647	3.28892	3.58155	3.59031	3.96665	4.03947	3.71851	3.67637	4.60945	4.56452
ENSMUSG00000013160	Atp6v0d1	10.5667	10.7594	10.7595	10.7435	10.7448	10.7645	10.5268	10.495	10.5612	10.633	10.5131	10.4936	10.31	10.3956	10.3903	10.4689	10.4775	10.2853	10.1846	10.4816	10.1563	10.302	10.4559	10.2132	10.8166	11.1047	10.9602	10.967	10.9475	11.0118	11.6916	11.7167	11.7833	11.9567	11.8321	11.8233	10.6952	10.7509	10.5276	10.5466	10.3528	10.4456	10.2742	10.3237	10.9605	10.9755	11.7305	11.8707
ENSMUSG00000013236	Ptprs	10.9048	10.7585	10.6304	10.7421	10.7508	10.5255	10.3545	10.2504	10.0865	10.1703	10.1304	10.165	10.3867	10.3777	10.226	10.2749	10.2671	10.4111	10.3306	10.1862	10.2739	10.3301	10.4496	10.5324	10.5615	10.5249	10.6984	10.6391	10.714	10.4118	11.476	11.6535	11.4538	11.4082	11.4541	11.5226	10.7646	10.6728	10.2304	10.1552	10.3822	10.256	10.2635	10.4373	10.5949	10.5883	11.5278	11.4616
ENSMUSG00000013275	Slc41a1	5.77633	5.78555	5.73152	5.74566	5.7283	5.62302	5.49006	5.32699	5.21037	5.37442	5.19329	5.32365	5.4669	5.44234	5.36296	5.49264	5.38334	5.36794	5.29061	5.25296	5.35486	5.30295	5.32079	5.33976	5.46132	5.48999	5.65656	5.72147	5.60843	5.60264	6.57791	6.66564	6.59328	6.54257	6.52618	6.62374	5.76447	5.69899	5.34247	5.29712	5.45462	5.41298	5.29948	5.32117	5.53596	5.64418	6.61228	6.56417
ENSMUSG00000013367	Iglon5	3.92128	3.81608	3.8562	3.87166	3.80886	3.87205	4.05699	3.98329	4.03415	4.03259	4.25167	4.14806	3.15198	3.16742	3.10114	3.09957	3.07742	3.14305	3.87239	3.95528	3.86571	3.86219	3.87622	3.88182	3.68102	3.67564	3.67509	3.68857	3.65325	3.65845	4.85626	4.79755	4.78381	4.93259	4.92908	4.8804	3.86452	3.85086	4.02481	4.14411	3.1597	3.09271	3.89779	3.87341	3.67725	3.66676	4.81254	4.91402
ENSMUSG00000013419	Zfp651	6.43479	6.46594	6.36056	6.43819	6.47167	6.18276	5.88705	5.72637	5.68816	5.79434	5.5386	5.66993	6.1517	6.09824	6.21447	6.06163	6.16623	6.24259	6.15191	6.06709	6.06677	6.20256	6.06407	6.19316	6.34233	6.31594	6.10129	6.18643	6.20265	6.30851	7.16819	7.05726	7.19606	7.30776	7.28137	7.24673	6.42043	6.36421	5.76719	5.66762	6.12497	6.14745	6.09526	6.15326	6.25319	6.23253	7.1405	7.27862
ENSMUSG00000013465	Nelfb	6.00304	6.02351	6.06684	6.05124	5.96114	5.93563	5.78905	5.63083	5.64846	5.57859	5.42146	5.71676	5.68741	5.82348	5.72003	5.73227	5.80943	5.80399	5.56447	5.6585	5.63825	5.64374	5.58652	5.80348	6.13894	6.22282	6.15457	6.21769	6.15081	6.18125	6.98708	7.01447	6.94349	6.90794	6.99273	6.98299	6.03113	5.98267	5.68945	5.57227	5.75545	5.75391	5.6204	5.67791	6.17211	6.18325	6.98168	6.96122
ENSMUSG00000013495	Tmem175	6.6724	6.62203	6.69426	6.81516	6.71376	6.70492	6.43958	6.42767	6.40504	6.15682	6.31463	6.34134	6.65054	6.43913	6.4025	6.44759	6.45241	6.43092	6.47248	6.43206	6.50336	6.46017	6.40708	6.46955	6.78834	6.91826	6.8287	6.92615	6.7642	6.7133	7.77284	7.6581	7.67657	7.64229	7.58265	7.71598	6.6629	6.74461	6.42409	6.27093	6.54483	6.43416	6.4693	6.4456	6.8451	6.80121	7.7025	7.64697
ENSMUSG00000013523	Bcas1	NA	NA	NA	NA	NA	NA	NA	NA	NA	NA	NA	NA	NA	NA	NA	NA	NA	NA	NA	NA	NA	NA	NA	NA	NA	NA	NA	NA	NA	NA	2.44652	2.46406	2.50375	2.48538	2.52477	2.53063	NA	NA	NA	NA	NA	NA	NA	NA	NA	NA	2.47144	2.5136
ENSMUSG00000013539	Tango2	6.28052	6.25719	6.23528	6.26518	6.31793	6.39298	6.06602	6.18178	6.1909	5.88139	6.15214	6.25066	6.21531	6.14183	6.19341	6.21438	6.22384	6.20229	6.325	6.259	6.1152	6.14054	6.19027	6.16499	6.43921	6.46504	6.40591	6.58551	6.59576	6.39154	7.32623	7.4737	7.46488	7.37311	7.46003	7.31684	6.25766	6.32536	6.14624	6.09473	6.17857	6.21054	6.23307	6.16526	6.43672	6.52427	7.42161	7.38333
ENSMUSG00000013593	Ndufs2	9.61978	9.59142	9.55548	9.55383	9.62265	9.44044	9.0975	9.04511	9.12444	9.13027	9.3596	9.2004	9.20125	9.14338	9.12426	9.37151	9.21496	9.22996	9.1291	9.17054	9.1278	9.29062	9.18688	9.30455	9.57854	9.60959	9.54702	9.65171	9.52208	9.51269	10.2749	10.5594	10.4589	10.3596	10.3249	10.447	9.58889	9.53897	9.08902	9.23009	9.17231	9.23691	9.14248	9.26068	9.57838	9.56216	10.4311	10.3772
ENSMUSG00000013622	Atraid	7.35401	7.33841	7.30075	7.39601	7.31803	7.33352	6.79683	6.91655	6.87508	6.76917	6.78716	7.02458	6.76917	6.90146	6.93331	6.92832	6.892	6.85108	6.90858	7.00194	6.90576	6.83625	6.90724	6.88694	7.35874	7.31021	7.5506	7.57498	7.37346	7.37712	8.2292	8.42023	8.35756	8.32502	8.36319	8.35333	7.33105	7.34919	6.86282	6.8603	6.83531	6.91788	6.93876	6.87681	7.40651	7.44185	8.33566	8.34718
ENSMUSG00000013629	Cad	5.16653	5.23176	5.21996	5.15057	5.2234	5.16591	4.90763	4.98536	5.00313	5.02158	5.31193	4.99737	5.07036	5.07343	4.99661	5.01884	5.09514	4.96693	5.10648	5.16565	5.05209	5.08704	5.00056	5.24509	5.46977	5.56855	5.43585	5.35448	5.40871	5.42361	6.37808	6.37849	6.46197	6.33712	6.52381	6.38882	5.20609	5.17996	4.96537	5.11029	5.07189	5.03687	5.10808	5.1109	5.49139	5.3956	6.40618	6.41658
ENSMUSG00000013646	Sh3bp5l	4.41726	4.39933	4.44488	4.47106	4.44065	4.46374	3.64678	3.57632	3.60827	3.56814	3.50856	3.53813	3.6672	3.61741	3.65865	3.6487	3.58357	3.63784	3.70757	3.69406	3.69397	3.73826	3.75382	3.82433	4.00874	4.05112	3.99254	3.94194	3.93031	3.93808	5.0449	4.96698	5.0299	4.95061	4.96341	4.88975	4.42049	4.45849	3.61046	3.53828	3.6423	3.63031	3.69853	3.77214	4.01747	3.93678	5.01393	4.93459
ENSMUSG00000013662	Atad1	9.56719	9.72843	9.75515	9.67836	9.65757	9.85398	9.46897	9.53596	9.70771	9.70663	9.53961	9.66826	9.28263	9.33089	9.41636	9.31752	9.40875	9.24703	9.07135	9.2076	9.19077	9.02517	8.93397	8.85801	9.91085	9.86936	9.91215	9.8379	9.85441	10.0635	10.7377	10.5398	10.5285	10.6928	10.5436	10.6338	9.68359	9.72997	9.57088	9.63817	9.30676	9.38088	9.15657	8.93905	9.89745	9.91862	10.602	10.6234
ENSMUSG00000013663	Pten	8.93078	9.10664	9.26472	9.05937	9.0453	9.26843	8.89815	8.88219	8.95502	8.95996	8.99263	8.97447	8.62419	8.68513	8.61714	8.66984	8.729	8.74972	8.5455	8.67261	8.6459	8.56761	8.43929	8.53212	9.32246	9.11328	9.06591	8.95592	8.9629	9.20871	10.1231	9.90317	10.0108	9.86513	9.78193	9.95976	9.10071	9.12437	8.91179	8.97569	8.65466	8.67199	8.62133	8.513	9.16722	9.04251	10.0124	9.86894
ENSMUSG00000013698	Pea15a	8.94887	8.98442	8.94425	8.77901	9.02101	8.94982	8.72859	8.89796	8.45355	8.95338	8.95992	8.56137	8.9417	8.77757	8.76065	8.68979	8.83238	9.10102	9.10281	8.75196	9.04543	8.87032	8.93165	9.16722	9.19173	9.1102	9.0855	8.97172	9.22397	8.87236	10.085	10.091	10.0842	9.87175	9.67485	10.0052	8.95918	8.91661	8.69337	8.82489	8.85963	8.76094	8.96673	8.98973	9.12914	9.02268	10.0868	9.85061
ENSMUSG00000013736	Trnt1	7.15448	7.2198	7.20942	7.10905	7.15913	7.29017	7.12436	7.03025	7.18441	7.3264	6.99315	7.01754	6.70026	6.93177	7.03076	6.98669	6.94905	6.84287	6.57564	6.79572	6.6187	6.77919	6.67491	6.65646	7.51929	7.53502	7.52266	7.57079	7.48447	7.67346	8.38203	8.21885	8.35471	8.43393	8.25047	8.29798	7.19456	7.18612	7.11301	7.11236	6.81602	6.98883	6.66335	6.70352	7.52566	7.57624	8.31853	8.32746
ENSMUSG00000013766	Ly6g6e	2.40953	2.43334	2.4146	2.40143	2.44055	2.44874	NA	NA	NA	NA	NA	NA	NA	NA	NA	NA	NA	NA	2.36238	2.35126	2.33058	2.33938	2.35434	2.38648	2.61861	2.71765	2.61378	2.60387	2.73284	2.65273	3.73305	3.71554	3.74422	3.77481	3.7644	3.7686	2.41916	2.43024	NA	NA	NA	NA	2.34807	2.36007	2.65001	2.66315	3.73094	3.76927
ENSMUSG00000013787	Ehmt2	8.14869	8.10707	7.88328	8.06618	8.02211	7.90749	7.76416	7.71615	7.60697	7.78516	7.47614	7.65591	7.93377	7.8835	7.7797	7.86263	7.83817	7.81292	7.79551	7.54364	7.8627	7.75754	7.57677	7.7467	7.94504	7.82135	8.00002	7.87729	8.06147	7.87962	8.89334	9.03481	8.89246	8.72166	8.88397	8.88357	8.04635	7.9986	7.69576	7.63907	7.90863	7.82683	7.73395	7.69367	7.92214	7.93946	8.9402	8.82974
ENSMUSG00000013822	Elof1	6.07896	5.99931	5.97406	6.01752	5.95772	6.06341	5.83352	5.71667	5.60605	5.72986	5.83987	5.64639	5.43023	5.59789	5.50786	5.67875	5.56223	5.54523	5.68587	5.453	5.50305	5.41846	5.50265	5.49534	5.75697	5.62048	5.59829	5.64004	5.72426	5.65331	6.69159	6.65987	6.62145	6.54338	6.64112	6.67934	6.01744	6.01288	5.71875	5.7387	5.51406	5.58295	5.54731	5.47215	5.65858	5.67254	6.65764	6.62128
ENSMUSG00000013833	Med16	6.07763	6.05279	5.91091	5.95901	6.14172	6.00161	5.73797	5.67883	5.64838	5.81315	5.76828	5.65956	5.71758	5.75729	5.72243	5.80827	5.63783	5.71765	6.20011	6.08001	6.07969	6.11321	6.16244	6.06351	6.27553	6.19026	6.09637	6.0719	6.13364	6.09283	7.31772	7.12521	7.2111	7.20296	7.24987	7.30496	6.01378	6.03411	5.68839	5.747	5.73743	5.72284	6.11994	6.11305	6.18739	6.09946	7.21801	7.2526
ENSMUSG00000013846	St3gal1	4.53154	4.45143	4.47793	4.41562	4.49581	4.39038	4.31879	4.19011	4.18814	4.15448	4.21297	4.24423	4.44108	4.42806	4.38628	4.44022	4.39671	4.38874	4.32781	4.34604	4.40552	4.26118	4.39379	4.46214	4.87141	4.67859	4.73629	4.75898	4.72519	4.74294	5.59603	5.41068	5.49371	5.38972	5.28287	5.28236	4.48697	4.43394	4.23235	4.20389	4.43457	4.40773	4.35979	4.37237	4.76209	4.74237	5.50014	5.31831
ENSMUSG00000013858	Tmem259	6.70833	6.58678	6.34046	6.44434	6.62835	6.46112	6.18703	6.26399	6.11563	6.10546	6.16629	6.33079	6.37046	6.42922	6.34323	6.44166	6.33921	6.36061	6.53573	6.45079	6.49181	6.38684	6.48811	6.52366	6.72478	6.79878	6.84261	6.8352	6.79617	6.67301	7.56583	7.69733	7.57479	7.49819	7.57381	7.48125	6.54519	6.51127	6.18888	6.20085	6.39984	6.3747	6.49278	6.4662	6.78872	6.76813	7.61265	7.51775
ENSMUSG00000013878	Rnf170	NA	NA	NA	NA	NA	NA	NA	NA	NA	NA	NA	NA	NA	NA	NA	NA	NA	NA	NA	NA	NA	NA	NA	NA	NA	NA	NA	NA	NA	NA	2.11738	2.06133	2.10818	2.10075	2.0743	2.10682	NA	NA	NA	NA	NA	NA	NA	NA	NA	NA	2.09563	2.09396
ENSMUSG00000013921	Clip3	10.4047	10.376	10.269	10.3627	10.3039	10.2835	10.1485	9.95466	9.78289	9.90026	9.94616	10.1716	10.1248	10.0576	9.98896	10.1336	10.0648	10.049	10.2239	10.0367	10.1416	10.1372	10.1423	10.1312	10.378	10.3158	10.3883	10.3278	10.4409	10.1702	11.2692	11.3925	11.3709	11.2645	11.3168	11.3212	10.3499	10.3167	9.96202	10.006	10.0912	10.0624	10.1341	10.1369	10.3607	10.3129	11.3442	11.3008
ENSMUSG00000013973	Dedd	5.62097	5.68386	5.45941	5.6322	5.60521	5.56276	5.11623	5.15894	5.10968	5.13746	4.83146	5.11063	5.3471	5.19332	5.18659	5.14946	5.19615	5.23985	5.2977	5.28184	5.37657	5.38908	5.30116	5.4447	5.48587	5.50749	5.53182	5.49326	5.55905	5.39926	6.50143	6.64319	6.42516	6.56452	6.49567	6.65507	5.58808	5.60005	5.12828	5.02652	5.27021	5.1774	5.3187	5.37831	5.50839	5.48385	6.52326	6.57175
ENSMUSG00000013997	Nit1	6.33407	6.21528	6.30172	6.19661	6.24207	6.23632	5.6701	5.72819	5.70088	5.68125	5.61619	5.59081	5.86983	5.68433	5.75976	5.74817	5.77162	5.82796	5.58116	5.60579	5.61897	5.64023	5.53414	5.69754	6.06969	6.28687	6.04169	6.06506	6.12095	6.05317	6.99768	6.95413	6.92129	7.00964	6.93867	6.99656	6.28369	6.225	5.69973	5.62942	5.77708	5.75985	5.60197	5.62397	6.13275	6.07972	6.9577	6.98162
ENSMUSG00000014039	Prdm15	5.69299	5.65894	5.58736	5.5405	5.63685	5.54815	5.36321	5.30315	5.33665	5.46464	5.23775	5.17306	5.43622	5.35139	5.30588	5.39256	5.40976	5.31228	5.15561	5.22206	5.13527	5.07378	5.13491	5.04103	5.76216	5.85	5.83345	5.80648	5.82288	5.76949	6.69214	6.8123	6.68794	6.61564	6.70722	6.61617	5.64643	5.57517	5.33433	5.29182	5.3938	5.3694	5.17098	5.08324	5.8152	5.79962	6.73079	6.64635
ENSMUSG00000014074	Rnf168	6.89777	6.95063	7.14754	6.96181	6.8975	7.11089	6.71978	6.74439	6.89863	6.95007	6.71469	6.79339	6.45662	6.55134	6.72915	6.67923	6.72211	6.55251	6.42914	6.50779	6.5074	6.47106	6.46308	6.35641	7.16509	7.10907	7.25037	7.16083	7.15466	7.3279	7.92257	7.90161	7.81319	7.90133	7.9122	7.7437	6.99865	6.99007	6.7876	6.81938	6.50398	6.71016	6.48144	6.43018	7.17484	7.21447	7.87912	7.85241
[truncated: 11,668 more rows]
[truncated: 24 more columns]
