# Supplementary material for: Prions induce minor genome-wide translational changes in neurons compared to glia
Source: bioRxiv preprint, doi:10.1101/2020.06.26.172841, version 1 (2020-06-27)
Supplement: Supplementary File 6 [file 172841_file09.xlsx]

## Sheet: SupplementaryTable6
GeneID	MGIsymbol	PV_2wpi_Ctrl_1	PV_2wpi_Ctrl_2	PV_2wpi_Ctrl_3	PV_2wpi_PrD_1	PV_2wpi_PrD_2	PV_2wpi_PrD_3	PV_4wpi_Ctrl_1	PV_4wpi_Ctrl_2	PV_4wpi_Ctrl_3	PV_4wpi_PrD_1	PV_4wpi_PrD_2	PV_4wpi_PrD_3	PV_8wpi_Ctrl_1	PV_8wpi_Ctrl_2	PV_8wpi_Ctrl_3	PV_8wpi_PrD_1	PV_8wpi_PrD_2	PV_8wpi_PrD_3	PV_16wpi_Ctrl_1	PV_16wpi_Ctrl_2	PV_16wpi_Ctrl_3	PV_16wpi_PrD_1	PV_16wpi_PrD_2	PV_16wpi_PrD_3	PV_24wpi_Ctrl_1	PV_24wpi_Ctrl_2	PV_24wpi_Ctrl_3	PV_24wpi_PrD_1	PV_24wpi_PrD_2	PV_24wpi_PrD_3	PV_term_Ctrl_1	PV_term_Ctrl_2	PV_term_Ctrl_3	PV_term_PrD_1	PV_term_PrD_2	PV_term_PrD_3	PV_2wpi_Ctrl	PV_2wpi_PrD	PV_4wpi_Ctrl	PV_4wpi_PrD	PV_8wpi_Ctrl	PV_8wpi_PrD	PV_16wpi_Ctrl	PV_16wpi_PrD	PV_24wpi_Ctrl	PV_24wpi_PrD	PV_term_Ctrl	PV_term_PrD
ENSMUSG00000000001	Gnai3	6.413	6.40249	6.34569	6.40037	6.25361	6.29873	7.03786	6.89008	6.96023	7.01853	6.98304	6.95929	6.42552	6.31578	6.11806	6.09823	6.22279	6.25728	6.84656	6.71703	6.62469	6.80485	6.73738	6.86577	6.62066	6.81653	6.68289	6.81609	6.92801	6.77706	6.31368	6.34435	6.4501	6.48941	6.55661	6.43865	6.38706	6.31757	6.96272	6.98695	6.28646	6.19277	6.72943	6.80267	6.70669	6.84039	6.36938	6.49489
ENSMUSG00000000028	Cdc45	2.55607	2.55243	2.60334	2.58443	2.65107	2.5941	3.34185	3.31819	3.39467	3.3086	3.36243	3.33517	2.97158	3.00254	2.84552	2.89612	2.88785	2.90505	3.12768	3.156	3.13544	3.10359	3.08928	3.1722	3.27397	3.2423	3.2815	3.20336	3.26676	3.22983	2.58928	2.54555	2.5139	2.57352	2.51939	2.4809	2.57061	2.60987	3.35157	3.3354	2.93988	2.89634	3.13971	3.12169	3.26592	3.23332	2.54958	2.5246
ENSMUSG00000000049	Apoh	NA	NA	NA	NA	NA	NA	1.97711	1.94923	1.9709	1.98807	1.99786	1.93848	2.84385	2.87591	2.888	3.00279	2.8593	2.84569	2.26529	2.30721	2.34106	2.31852	2.3398	2.35464	2.78023	2.8901	2.97918	2.79081	2.92017	2.8161	NA	NA	NA	NA	NA	NA	NA	NA	1.96575	1.9748	2.86925	2.90259	2.30452	2.33765	2.88317	2.84236	NA	NA
ENSMUSG00000000056	Narf	7.67917	7.52032	7.58996	7.45748	7.46622	7.47732	8.22626	8.29155	8.31062	8.3136	8.35997	8.42627	7.90202	7.76742	7.84976	7.8814	7.78372	7.77443	7.95493	7.90072	7.99242	8.03359	7.78555	7.87354	8.12915	8.00358	8.07788	8.16249	8.14518	8.07998	7.62476	7.51672	7.54247	7.54446	7.50559	7.43262	7.59648	7.46701	8.27614	8.36661	7.83973	7.81318	7.94936	7.89756	8.07021	8.12922	7.56132	7.49423
ENSMUSG00000000058	Cav2	4.77705	4.72208	4.64538	4.78149	4.71145	4.81368	5.64231	5.65983	5.57229	5.61281	5.60061	5.66436	5.24687	5.28325	5.24268	4.92665	5.29196	5.32002	5.29158	5.29159	5.19908	5.13886	5.26613	5.22407	5.30853	5.46486	5.44321	5.45673	5.39878	5.33888	5.02749	4.98541	4.97182	5.12032	5.07994	5.09657	4.71484	4.76887	5.62481	5.62593	5.2576	5.17954	5.26075	5.20969	5.40554	5.39813	4.9949	5.09895
ENSMUSG00000000078	Klf6	5.08886	5.05633	5.06403	5.18569	5.23215	5.13723	6.12743	6.16358	6.13627	6.11294	5.98552	6.05282	5.78071	5.68665	5.80982	5.63738	5.79895	5.67131	5.82191	5.81421	5.8624	6.07036	5.92635	5.91972	6.12561	6.06445	6.06607	6.08226	6.05264	5.98497	5.58171	5.51505	5.45611	5.59352	5.62413	5.59466	5.06974	5.18502	6.14242	6.05043	5.75906	5.70255	5.83284	5.97214	6.08538	6.03996	5.51762	5.6041
ENSMUSG00000000085	Scmh1	5.58909	5.48767	5.35333	5.36303	5.35813	5.39284	6.07987	6.01753	6.04325	5.99075	6.00717	6.03925	5.36714	5.58277	5.51879	5.6751	5.44371	5.60023	5.64368	5.66852	5.60102	5.66549	5.65718	5.68645	5.82847	5.90342	5.9433	6.05017	5.88354	5.94268	5.2395	5.18354	5.31327	5.22886	5.31174	5.29721	5.4767	5.37133	6.04688	6.01239	5.48956	5.57302	5.63774	5.66971	5.89173	5.95879	5.24543	5.27927
ENSMUSG00000000088	Cox5a	11.0928	11.0964	11.1656	10.9995	10.9313	10.9362	11.768	11.7244	11.8113	11.7388	11.6629	11.7091	11.4451	11.4146	11.4631	11.4632	11.3204	11.4597	11.7236	11.7305	11.6338	11.6913	11.7281	11.7068	12.0396	11.7885	11.7576	11.8168	11.9053	11.9023	11.3022	11.2504	11.2182	11.3083	11.1874	11.177	11.1183	10.9556	11.7679	11.7036	11.4409	11.4144	11.696	11.7088	11.8619	11.8748	11.2569	11.2242
ENSMUSG00000000120	Ngfr	5.75517	5.85551	5.74212	5.72719	5.84928	6.11934	7.11716	7.20586	7.09478	7.09601	6.96191	7.04059	7.12853	7.99911	7.45326	7.94681	7.73318	7.62608	6.5607	6.93979	6.53558	6.85733	6.60994	6.48727	6.92243	7.66472	7.77234	7.20748	7.41574	7.56215	5.8137	6.12436	6.02062	5.83383	5.8644	6.0092	5.78427	5.8986	7.13927	7.03284	7.52697	7.76869	6.67869	6.65151	7.45316	7.39512	5.98623	5.90247
ENSMUSG00000000125	Wnt3	6.14165	6.3325	6.35685	6.1963	6.25834	6.32418	7.42546	7.44699	7.179	7.37762	7.37818	7.39667	7.19575	7.99938	7.67487	7.85469	7.44163	7.42179	7.00661	7.15682	6.95988	6.84367	6.90544	6.91291	6.86744	7.40707	7.63383	7.30932	7.36436	7.32305	6.49507	6.54648	6.46988	6.34091	6.53265	6.63044	6.277	6.25961	7.35048	7.38416	7.62333	7.5727	7.0411	6.88734	7.30278	7.33224	6.50381	6.50133
ENSMUSG00000000127	Fer	5.96766	6.21269	6.15435	6.267	6.08822	6.16297	6.99226	6.93694	6.92841	7.01112	6.99269	6.94789	6.62943	6.27274	6.30688	6.26693	6.30699	6.35711	6.7651	6.67482	6.83193	6.84303	6.75467	6.8358	6.94778	6.8679	6.77765	6.95895	6.91143	6.78218	6.48198	6.27769	6.45351	6.38445	6.36362	6.50143	6.11157	6.17273	6.95254	6.9839	6.40301	6.31034	6.75729	6.81117	6.86444	6.88418	6.40439	6.4165
ENSMUSG00000000131	Xpo6	7.25439	7.19446	6.90433	7.14977	7.09386	7.06603	7.89338	7.8738	7.9057	7.84205	7.93093	7.8238	7.61643	7.50383	7.40214	7.46433	7.59805	7.54745	7.74616	7.65042	7.70444	7.65415	7.71316	7.66059	7.85526	7.68176	7.59275	7.67923	7.63626	7.65407	6.99	6.97787	7.11239	7.06403	7.10246	7.17805	7.11772	7.10322	7.89096	7.86559	7.50747	7.53661	7.70034	7.67596	7.70992	7.65652	7.02675	7.11485
ENSMUSG00000000134	Tfe3	6.39304	6.32215	6.33976	6.16294	6.40124	6.30831	7.08444	6.95374	6.94334	7.05378	6.92944	6.88011	6.5066	6.24157	6.33568	6.27523	6.28736	6.37618	6.73397	6.85819	6.75452	6.72264	6.7274	6.70169	6.95346	6.91743	6.89814	6.98876	6.92744	6.93801	6.71696	6.57762	6.55163	6.57274	6.82472	6.60702	6.35165	6.29083	6.99384	6.95444	6.36128	6.31292	6.78223	6.71724	6.92301	6.9514	6.61541	6.66816
ENSMUSG00000000142	Axin2	4.55945	4.49081	4.67201	4.45374	4.4649	4.44542	5.08864	4.97702	5.08354	5.03784	4.98108	4.9638	4.62906	4.44889	4.34828	4.31481	4.43473	4.51911	4.81169	4.80413	4.81894	4.79729	4.73439	4.78191	4.54318	4.48702	4.60698	4.6041	4.69587	4.5156	4.33131	4.294	4.38841	4.32449	4.348	4.35699	4.57409	4.45469	5.04974	4.99424	4.47541	4.42288	4.81159	4.7712	4.54573	4.60519	4.33791	4.34316
ENSMUSG00000000148	Brat1	4.46578	4.62887	4.46044	4.48766	4.54458	4.46844	5.06185	4.99292	5.01452	5.07961	5.03808	5.06323	4.65033	4.47455	4.54861	4.6455	4.48394	4.5851	5.16991	5.1181	5.06186	5.20602	5.07052	5.24375	5.25049	5.03943	5.12955	5.23573	5.34869	5.20866	5.03143	4.8699	4.93683	4.963	5.08079	5.12772	4.51836	4.50023	5.0231	5.06031	4.55783	4.57151	5.11662	5.17343	5.13982	5.26436	4.94605	5.05717
ENSMUSG00000000149	Gna12	3.98083	3.99267	3.90945	4.00375	3.94982	4.08424	4.62249	4.4595	4.54054	4.49732	4.51545	4.50185	4.39034	4.77957	4.64607	4.8792	4.65	4.40205	4.24054	4.15556	4.18757	4.09518	4.17868	4.24302	4.7601	4.6114	4.69851	4.52787	4.68777	4.61369	3.98313	3.96069	4.0251	4.18744	4.05183	4.04472	3.96099	4.0126	4.54084	4.50487	4.60533	4.64375	4.19455	4.17229	4.69	4.60978	3.98964	4.09466
ENSMUSG00000000167	Pih1d2	NA	NA	NA	NA	NA	NA	2.07042	2.09184	2.05478	2.04445	2.05418	2.02281	1.89427	1.73327	1.8776	1.70492	1.81482	1.74239	2.29182	2.25244	2.24036	2.26286	2.26967	2.26361	2.3407	2.39009	2.37077	2.35329	2.35418	2.40714	2.77489	2.82486	2.76362	2.81166	2.82039	2.82813	NA	NA	2.07235	2.04048	1.83505	1.75404	2.26154	2.26538	2.36719	2.37154	2.78779	2.82006
ENSMUSG00000000168	Dlat	9.24356	9.34881	9.55542	9.30621	9.16995	9.14579	10.2511	10.0684	10.0273	10.2062	10.06	10.0793	9.67691	9.47231	9.51967	9.4494	9.51269	9.47016	10.2825	10.2757	10.2028	10.1578	10.2754	10.2274	10.5468	10.4574	10.3199	10.5076	10.507	10.535	10.1234	10.154	10.1	10.2711	10.0589	10.0574	9.3826	9.20732	10.1156	10.1152	9.5563	9.47741	10.2537	10.2202	10.4414	10.5165	10.1258	10.1291
ENSMUSG00000000171	Sdhd	7.42672	7.28077	7.10942	7.25768	7.35195	7.35224	8.11471	7.90189	7.9375	8.04622	8.00838	7.8958	7.43573	7.42986	7.50645	7.55478	7.38107	7.56186	7.72766	7.76442	7.73077	7.53127	7.62124	7.64252	7.93794	7.90621	7.86585	7.85681	7.7952	7.93551	7.45514	7.53975	7.518	7.48579	7.66689	7.5749	7.2723	7.32062	7.9847	7.98347	7.45735	7.49924	7.74095	7.59834	7.90333	7.86251	7.5043	7.57586
ENSMUSG00000000184	Ccnd2	3.15256	3.07832	3.06606	3.28501	3.15576	3.1579	4.28431	4.32747	4.24159	4.20063	4.27454	4.28711	3.98007	3.95337	3.89984	3.98816	3.97314	4.03726	4.39731	4.40716	4.50531	4.31613	4.41968	4.48258	4.28192	4.04709	4.0957	4.18739	4.27716	4.143	4.26215	4.13125	4.14374	4.13227	4.27607	4.21772	3.09898	3.19956	4.28446	4.25409	3.94443	3.99952	4.43659	4.40613	4.14157	4.20252	4.17904	4.20869
ENSMUSG00000000194	Gpr107	7.95382	8.21253	8.20549	8.20212	8.26375	8.37592	9.5092	9.62758	9.32826	9.44653	9.45285	9.45354	9.24231	9.87467	9.65287	9.70768	9.6486	9.59712	9.06361	9.11483	8.83647	8.95717	9.02989	8.85048	9.34187	9.6308	9.8039	9.3971	9.44741	9.41737	8.3823	8.68371	8.58616	8.56324	8.56417	8.50034	8.12395	8.2806	9.48835	9.45097	9.58995	9.65113	9.00497	8.94585	9.59219	9.42062	8.55072	8.54258
ENSMUSG00000000197	Nalcn	8.98152	9.1957	9.38812	9.41004	9.3322	9.41299	10.5074	10.7905	10.2845	10.4633	10.5923	10.4418	10.5725	11.2667	11.0808	10.966	11.0497	11.0344	10.2689	10.2722	9.99253	10.2633	10.2812	10.0496	10.6554	11.0052	11.2131	10.6796	10.6863	10.7054	9.81805	10.0611	9.88017	9.99948	9.87559	9.78268	9.18845	9.38507	10.5275	10.4991	10.9734	11.0167	10.1779	10.198	10.9579	10.6904	9.91978	9.88592
ENSMUSG00000000202	Btbd17	2.11987	2.14404	2.20926	2.16539	2.18987	2.20765	2.91328	2.83084	2.80971	2.91467	2.84599	2.87983	2.51074	2.43112	2.23295	2.20513	2.28615	2.34716	2.58888	2.5273	2.52645	2.49742	2.57148	2.54453	2.37746	2.3846	2.47162	2.37252	2.4718	2.37125	2.21214	2.19222	2.16378	2.20971	2.16819	2.1402	2.15772	2.18764	2.85128	2.88016	2.3916	2.27948	2.54754	2.53781	2.41123	2.40519	2.18938	2.1727
ENSMUSG00000000214	Th	5.63566	5.19796	5.06884	5.12792	5.19304	5.10197	5.79098	5.8374	5.88801	5.72556	5.82766	5.92441	5.42164	5.4461	5.30654	5.64753	5.37149	5.56832	5.45527	5.43885	5.37117	5.30801	5.39253	5.43239	5.79225	6.01446	6.16645	6.79556	6.42256	6.16244	6.6515	6.74866	6.66471	8.11381	9.03363	8.59461	5.30082	5.14098	5.8388	5.82588	5.39142	5.52911	5.42176	5.37765	5.99106	6.46019	6.68829	8.58068
ENSMUSG00000000216	Scnn1g	3.52309	3.40196	3.58868	3.48583	3.47263	3.39329	4.63563	4.65261	4.61396	4.68527	4.70302	4.71641	4.13562	4.30629	4.36819	4.23202	4.29193	4.07163	3.67957	3.66459	3.567	3.64079	3.70782	3.62106	4.32096	4.4643	4.61688	4.46872	4.33217	4.47827	3.33508	3.31931	3.41988	3.41649	3.41048	3.30697	3.50458	3.45058	4.63407	4.70157	4.27003	4.19853	3.63705	3.65656	4.46738	4.42639	3.35809	3.37798
ENSMUSG00000000223	Drp2	4.99427	5.11119	5.01416	5.11265	5.25996	5.18561	6.11448	6.07857	6.12209	6.04712	6.21289	6.12378	5.87385	6.15153	6.31513	6.18455	6.21087	6.04142	5.6793	5.64747	5.74873	5.71053	5.64375	5.72386	6.07735	5.88095	5.85554	5.88241	5.96914	5.77969	5.66575	5.7686	5.58895	5.67804	5.7626	5.83189	5.03987	5.18607	6.10505	6.12793	6.1135	6.14561	5.69183	5.69271	5.93795	5.87708	5.67443	5.75751
ENSMUSG00000000247	Lhx2	2.0742	2.11858	2.08338	2.13214	2.19174	2.14578	3.26722	3.2928	3.34201	3.2519	3.20859	3.21602	2.95525	2.7051	2.80089	2.74289	2.77458	2.75967	2.92777	2.88052	2.88379	2.87721	2.82869	2.80787	2.74353	2.71774	2.6905	2.70593	2.7072	2.62051	2.55126	2.47526	2.51343	2.5225	2.53228	2.54757	2.09206	2.15655	3.30067	3.2255	2.82041	2.75905	2.89736	2.83792	2.71726	2.67788	2.51332	2.53412
ENSMUSG00000000253	Gmpr	7.04132	7.01765	6.94087	6.99076	6.91835	6.89903	7.59654	7.46334	7.62666	7.57512	7.58716	7.57804	7.02576	6.9712	6.75551	7.04462	6.97519	7.00092	7.28354	7.27985	7.33682	7.17918	7.26846	7.26386	7.50063	7.35204	7.44302	7.44747	7.38263	7.49963	7.3019	7.21863	7.14952	7.27645	7.36204	7.31363	6.99995	6.93605	7.56218	7.58011	6.91749	7.00691	7.30007	7.23717	7.4319	7.44324	7.22335	7.31737
ENSMUSG00000000263	Glra1	8.44206	8.71101	8.83636	8.71675	8.64975	8.71124	9.73263	10.0483	9.65008	9.80311	9.75983	9.68386	9.74226	10.1358	9.93266	9.63946	9.96792	9.80591	9.43205	9.48237	8.88379	9.44958	9.28536	9.16181	10.0554	9.97199	10.408	9.58121	9.63675	9.68734	9.57127	9.42016	9.28913	9.52965	9.48798	9.38583	8.66314	8.69258	9.81035	9.74893	9.93692	9.80443	9.26607	9.29892	10.1451	9.6351	9.42685	9.46782
ENSMUSG00000000266	Mid2	6.6284	6.50588	6.42421	6.48232	6.49945	6.63493	7.50123	7.58716	7.62304	7.55376	7.60166	7.44307	7.10557	6.84138	7.0063	6.96123	7.07088	7.00585	7.02528	6.99217	6.96529	7.15031	6.9868	7.05146	7.34299	7.37188	7.54654	7.50159	7.48193	7.4211	6.785	6.97245	6.77326	6.87203	6.80718	6.75512	6.5195	6.5389	7.57047	7.53283	6.98441	7.01265	6.99425	7.06285	7.42047	7.46821	6.84357	6.81144
ENSMUSG00000000276	Dgke	8.59422	8.59107	8.83649	8.74925	8.70596	8.70095	9.56696	9.84956	9.61587	9.61488	9.76241	9.70138	9.47362	9.85101	9.6385	9.74971	9.70983	9.63497	8.95118	9.03751	8.86785	9.01382	8.92152	9.06012	9.13056	9.20089	9.58404	9.14017	9.24994	9.11563	8.7121	8.75057	8.81191	8.75414	8.71396	8.68251	8.67393	8.71872	9.67747	9.69289	9.65438	9.69817	8.95218	8.99849	9.30516	9.16858	8.7582	8.71687
ENSMUSG00000000278	Scpep1	6.97322	6.80471	6.821	6.80758	6.9061	6.93115	7.89594	8.08641	7.92212	7.91804	8.02431	7.89388	7.97633	8.66733	8.38713	8.31465	8.31069	8.21964	7.57802	7.67743	7.44836	7.71762	7.45548	7.49211	8.21357	8.23648	8.41281	8.01054	8.00974	8.05863	7.2567	7.21106	7.21577	7.21401	7.2509	7.05035	6.86631	6.88161	7.96816	7.94541	8.3436	8.28166	7.56794	7.55507	8.28762	8.0263	7.22784	7.17175
ENSMUSG00000000282	Mnt	4.85945	4.81002	4.98168	4.81989	4.77334	4.80873	5.75289	5.75532	5.69378	5.83796	5.70369	5.74171	5.32882	5.42854	5.43016	5.41579	5.41097	5.39505	5.84492	5.90361	5.8828	5.88884	5.9409	5.87238	6.32008	6.2497	6.29582	6.29087	6.10524	6.32122	5.89835	6.1097	5.894	5.80548	5.89618	5.80814	4.88372	4.80065	5.734	5.76112	5.39584	5.40727	5.87711	5.90071	6.28853	6.23911	5.96735	5.8366
ENSMUSG00000000290	Itgb2	NA	NA	NA	NA	NA	NA	2.17857	2.16456	2.15284	2.16009	2.12295	2.16547	2.08152	2.06556	2.11451	2.19573	2.15032	2.15491	NA	NA	NA	NA	NA	NA	2.04864	1.96323	1.94162	2.0117	1.99528	1.96201	3.61419	3.59543	3.77355	3.71355	3.93607	3.80528	NA	NA	2.16532	2.1495	2.0872	2.16698	NA	NA	1.9845	1.98966	3.66106	3.8183
ENSMUSG00000000295	Hddc2	4.16262	4.08599	4.18692	4.10011	4.16371	4.03273	4.57225	4.61394	4.5643	4.57765	4.58099	4.5348	4.5573	4.56843	4.37572	4.41197	4.57389	4.63262	4.70357	4.69478	4.69817	4.76502	4.69704	4.7032	4.70896	4.59774	4.79	4.68721	4.74715	4.74935	4.16334	4.25538	4.19029	4.29085	4.17352	4.27028	4.14518	4.09885	4.5835	4.56448	4.50048	4.53949	4.69884	4.72175	4.6989	4.7279	4.203	4.24488
ENSMUSG00000000296	Tpd52l1	4.48169	4.65737	4.68805	4.68974	4.62265	4.6816	5.32089	5.3096	5.3685	5.36504	5.34533	5.37563	4.98813	4.78214	4.88357	4.81491	4.66822	4.92533	5.44144	5.32299	5.33083	5.32423	5.39022	5.37992	5.7407	5.60631	5.58093	5.81792	5.67647	5.59657	5.18892	5.2095	5.37807	5.41765	5.51078	5.33423	4.60904	4.66466	5.333	5.362	4.88461	4.80282	5.36509	5.36479	5.64265	5.69698	5.25883	5.42089
ENSMUSG00000000301	Pemt	1.84952	1.91824	1.86132	1.86753	1.94736	1.91203	3.44683	3.46625	3.43716	3.51755	3.46888	3.5311	3.18131	3.26352	3.24526	3.11099	3.2941	3.38945	2.75998	2.78535	2.75776	2.73284	2.77661	2.69875	3.4694	3.39162	3.43867	3.31435	3.43895	3.31455	2.71063	2.73405	2.67261	2.72035	2.69157	2.62889	1.87636	1.90897	3.45008	3.50584	3.23003	3.26485	2.7677	2.73607	3.43323	3.35595	2.70577	2.68027
ENSMUSG00000000303	Cdh1	5.91697	5.60423	5.80736	5.68542	5.67515	5.68366	6.79653	6.8419	6.66709	6.72662	6.83223	6.77113	6.50013	6.95055	6.93378	6.86172	6.64593	6.78767	6.23923	6.23581	6.19612	6.28475	6.18184	6.12219	6.69757	7.13786	7.20944	6.92377	6.99508	6.99838	6.06975	6.43933	6.17054	6.21265	6.13171	6.16172	5.77619	5.68141	6.76851	6.77666	6.79482	6.76511	6.22372	6.19626	7.01496	6.97241	6.22654	6.16869
ENSMUSG00000000305	Cdh4	4.72676	4.79436	4.72891	4.91143	4.89968	4.85913	6.03656	6.26941	6.05637	6.18482	6.10586	6.06058	6.43421	6.82042	6.97987	6.46354	6.5647	6.53597	6.14006	6.10511	5.91024	6.14361	5.97029	5.91672	6.58964	6.80751	6.78192	6.57687	6.52322	6.78026	5.83329	5.81826	5.62947	5.76611	5.63725	5.75388	4.75001	4.89008	6.12078	6.11709	6.74483	6.52141	6.0518	6.01021	6.72636	6.62678	5.76034	5.71908
ENSMUSG00000000308	Ckmt1	9.60253	9.40984	9.15075	9.31611	9.31825	9.44211	9.9631	9.97739	10.1338	9.94777	9.99448	10.0297	9.68874	9.86746	9.91177	9.83589	9.8133	9.83692	9.83354	9.91022	10.1129	9.98943	9.94559	10.0712	10.3692	9.94525	9.90848	10.0151	10.0495	9.92781	10.2215	10.0514	10.0033	10.0583	10.2165	10.2109	9.38771	9.35882	10.0248	9.99064	9.82265	9.8287	9.95223	10.0021	10.0743	9.99748	10.0921	10.1619
ENSMUSG00000000325	Arvcf	4.33598	4.23986	4.08272	4.23011	4.29454	4.3327	5.21109	5.12179	5.2345	5.02962	5.17515	5.06413	4.92385	4.96782	4.90137	4.71501	4.93138	4.76739	4.61079	4.60179	4.60592	4.60728	4.55102	4.5715	4.82378	4.76911	4.77989	4.75443	4.75785	4.74541	4.68969	4.90223	4.79566	4.72686	4.91294	4.89273	4.21952	4.28578	5.18913	5.08964	4.93101	4.80459	4.60616	4.5766	4.79093	4.75256	4.79586	4.84418
ENSMUSG00000000326	Comt	8.74937	8.45412	8.2689	8.38116	8.45246	8.62352	8.99429	8.89732	9.19391	8.89951	8.98037	9.00537	8.63638	8.74988	8.83115	8.78555	8.67278	8.69435	8.68317	8.71418	8.81854	8.63908	8.58661	8.86293	9.02683	8.56175	8.66247	8.77578	8.8248	8.70132	8.29474	8.10986	8.21575	8.27983	8.2803	8.36968	8.49079	8.48571	9.0285	8.96175	8.73913	8.71756	8.73863	8.69621	8.75035	8.7673	8.20678	8.30993
ENSMUSG00000000339	Rtca	8.04769	7.89563	7.80016	7.86378	7.74566	7.75701	8.54054	8.42581	8.61568	8.56124	8.51626	8.41498	8.13487	7.71675	7.87619	7.83982	7.86419	7.70602	8.38493	8.42694	8.39982	8.39871	8.35332	8.48538	8.71398	8.51472	8.44433	8.67888	8.63701	8.63367	8.19465	8.1924	8.21664	8.23872	8.32326	8.23284	7.91449	7.78882	8.52734	8.49749	7.90927	7.80334	8.4039	8.41247	8.55767	8.64986	8.20123	8.26494
ENSMUSG00000000340	Dbt	5.96909	6.38615	6.13554	6.26869	6.17837	6.12688	6.8925	6.77443	6.9239	6.78527	6.84248	6.89761	6.30043	6.1258	6.15819	6.1291	6.11332	6.41699	6.84817	6.74939	6.69261	6.62851	6.67087	6.86042	6.77818	6.65834	6.65211	6.87942	6.91742	6.78377	6.39536	6.45832	6.40205	6.40351	6.37616	6.24546	6.16359	6.19131	6.86361	6.84179	6.19481	6.2198	6.76339	6.71993	6.69621	6.8602	6.41858	6.34171
ENSMUSG00000000346	Dazap2	7.75361	7.51098	7.43609	7.29357	7.40555	7.48017	8.28408	8.09885	8.06038	8.26091	8.115	8.11013	7.80374	7.81462	7.84358	7.7965	7.68553	7.87041	8.17851	8.26833	8.22708	8.2231	8.18302	8.13182	8.33221	8.34074	8.34693	8.41417	8.33338	8.43879	7.78836	7.73077	7.79735	7.72796	7.84674	7.80731	7.56689	7.3931	8.14777	8.16201	7.82065	7.78415	8.22464	8.17931	8.33996	8.39545	7.77216	7.794
ENSMUSG00000000355	Mcts1	7.92425	8.444	8.68735	8.61275	8.38236	8.22959	9.30433	9.16788	9.16481	9.35787	9.21233	9.21177	8.99797	8.75539	8.85623	8.74352	8.78236	8.76378	9.24435	9.19805	9.08108	9.13388	9.32361	9.32511	9.03602	9.34185	9.1729	9.22168	9.33815	9.32074	8.87867	8.67764	8.7861	8.97931	8.66433	8.7401	8.35187	8.40823	9.21234	9.26066	8.86986	8.76322	9.17449	9.26087	9.18359	9.29352	8.7808	8.79458
ENSMUSG00000000365	Rnf17	3.07871	3.2838	3.14838	3.17733	3.21019	3.18534	4.37565	4.25337	4.45386	4.26505	4.43958	4.39852	4.23486	4.04346	4.06375	4.15632	4.15809	4.14201	4.60121	4.4788	4.45916	4.53692	4.59705	4.5878	4.50607	4.53882	4.51692	4.65574	4.70283	4.67204	4.14843	4.16724	4.20664	4.30682	4.23507	4.17374	3.1703	3.19095	4.36096	4.36772	4.11402	4.15214	4.51306	4.57393	4.5206	4.67687	4.1741	4.23854
ENSMUSG00000000374	Trappc10	7.84686	7.72602	7.62394	7.78814	7.8414	7.80601	8.54792	8.60395	8.64402	8.57505	8.63853	8.58821	8.24495	7.9742	8.04649	8.01184	8.11754	8.07253	8.28124	8.24043	8.19008	8.29626	8.23348	8.22495	8.47033	8.36645	8.38808	8.46354	8.519	8.39253	7.70948	7.58499	7.76404	7.6552	7.67504	7.6562	7.73227	7.81185	8.59863	8.6006	8.08855	8.0673	8.23725	8.25157	8.40828	8.45836	7.68617	7.66215
ENSMUSG00000000378	Ccm2	5.78559	5.55932	5.46017	5.48714	5.72959	5.59789	6.22553	6.13551	6.28483	6.08836	6.19556	6.30336	5.71338	5.88337	5.84843	5.96983	5.93682	6.00584	5.74673	5.6125	5.71819	5.57122	5.66242	5.76684	5.90278	5.72004	5.92887	5.85728	5.87002	5.93125	5.22337	5.33566	5.28535	5.31299	5.22794	5.28776	5.60169	5.60487	6.21529	6.19576	5.81506	5.97083	5.69247	5.66683	5.85056	5.88618	5.28146	5.27623
ENSMUSG00000000384	Tbrg4	6.39673	6.2586	6.2927	6.40397	6.29289	6.31802	6.85754	6.81662	6.89069	6.83686	6.89941	6.90806	6.38765	6.26462	6.34283	6.30111	6.25656	6.14732	6.50222	6.46694	6.52433	6.44726	6.50621	6.49213	6.56989	6.56741	6.45049	6.47551	6.63568	6.43744	6.31665	6.19862	6.26415	6.35256	6.54838	6.40903	6.31601	6.3383	6.85495	6.88144	6.3317	6.235	6.49783	6.48186	6.52926	6.51621	6.25981	6.43666
ENSMUSG00000000392	Fap	1.94776	1.92561	1.88578	1.9553	1.9013	1.90487	2.58531	2.55236	2.6121	2.56595	2.59445	2.57684	NA	NA	NA	NA	NA	NA	NA	NA	NA	NA	NA	NA	NA	NA	NA	NA	NA	NA	NA	NA	NA	NA	NA	NA	1.91972	1.92049	2.58326	2.57908	NA	NA	NA	NA	NA	NA	NA	NA
ENSMUSG00000000399	Ndufa9	9.32615	9.34654	9.03501	9.25304	9.26893	9.32398	9.93261	9.84577	10.0014	9.90522	9.90265	9.93551	9.41716	9.1959	9.33229	9.45265	9.28927	9.38904	9.76985	9.68278	9.86024	9.735	9.69837	9.71651	9.91846	9.71702	9.72318	9.9333	9.8739	9.86931	9.65351	9.55384	9.66238	9.62128	9.63499	9.64655	9.2359	9.28198	9.92659	9.91446	9.31512	9.37699	9.77096	9.71663	9.78622	9.89217	9.62324	9.63427
ENSMUSG00000000402	Egfl6	1.85116	1.92286	1.97318	1.9073	1.85625	1.86479	2.57289	2.64067	2.54778	2.59026	2.57374	2.54546	2.31549	2.49906	2.37853	2.36347	2.48674	2.41542	2.29361	2.25363	2.2565	2.24078	2.25658	2.28822	2.94404	2.85144	2.92314	2.8744	2.80929	2.78703	2.36359	2.31657	2.35057	2.28168	2.33224	2.31172	1.91573	1.87611	2.58711	2.56982	2.39769	2.42187	2.26791	2.26186	2.90621	2.82358	2.34358	2.30854
ENSMUSG00000000416	Cttnbp2	8.01925	8.18459	8.10512	7.96694	7.8905	7.8199	8.86765	8.79019	8.8911	8.84642	8.7843	8.88763	8.28449	8.24596	8.11582	8.39089	8.23252	8.34507	8.53716	8.6604	8.58606	8.49106	8.55094	8.68853	8.90826	8.75293	8.79222	8.8396	9.0233	8.8201	8.583	8.64167	8.51775	8.31944	8.33632	8.48698	8.10299	7.89244	8.84965	8.83945	8.21542	8.32283	8.59454	8.57684	8.8178	8.89433	8.58081	8.38091
ENSMUSG00000000420	Galnt1	7.95187	8.1357	8.43978	8.18645	8.22632	8.22842	9.33986	9.57616	9.31623	9.41136	9.37845	9.40851	9.32184	9.92063	9.76	9.75581	9.60713	9.64259	9.18603	9.22749	9.00691	9.2617	9.13696	8.98089	9.63898	9.9671	9.99202	9.74997	9.70686	9.8522	8.48219	8.66886	8.5628	8.47467	8.1233	8.40483	8.17578	8.21373	9.41075	9.39944	9.66749	9.66851	9.14014	9.12652	9.86603	9.76967	8.57129	8.33427
ENSMUSG00000000439	Mkrn2	6.47667	6.16713	6.12915	6.18625	6.25374	6.34466	7.04015	6.98878	7.06854	6.99262	6.93256	7.10229	6.60452	6.64534	6.79371	6.7169	6.5515	6.58367	6.96641	6.80491	6.98028	6.86327	6.77221	6.80545	6.94074	6.85498	6.80944	6.86326	6.8354	6.94948	6.59579	6.54503	6.43561	6.46458	6.46791	6.6209	6.25765	6.26155	7.03249	7.00916	6.68119	6.61735	6.9172	6.81364	6.86839	6.88271	6.52548	6.51779
ENSMUSG00000000440	Pparg	2.6605	2.60469	2.5547	2.66416	2.61429	2.65893	3.35744	3.42651	3.39248	3.37905	3.39786	3.3944	3.12044	3.12771	3.17769	3.11863	3.0991	3.15273	3.38397	3.39823	3.40519	3.41961	3.3595	3.34337	4.01233	3.96066	3.8295	3.82784	3.94388	3.95023	3.00466	3.12085	2.9265	2.94932	2.93291	2.94646	2.60663	2.64579	3.39214	3.39044	3.14194	3.12349	3.3958	3.37416	3.93416	3.90732	3.01733	2.9429
ENSMUSG00000000441	Raf1	7.09166	7.17951	6.98732	7.04107	7.044	6.99954	7.78459	7.62361	7.79308	7.75346	7.79802	7.77447	7.24294	7.37433	7.564	7.55797	7.44864	7.46988	7.43204	7.46767	7.40653	7.4134	7.52879	7.40153	7.50371	7.44302	7.56951	7.49418	7.54135	7.49954	7.12478	7.19732	7.20073	7.10462	7.15613	7.15022	7.08616	7.0282	7.73376	7.77532	7.39376	7.49217	7.43542	7.44791	7.50541	7.51169	7.17428	7.13699
ENSMUSG00000000486	2001-09-01	NA	NA	NA	NA	NA	NA	NA	NA	NA	NA	NA	NA	2.01903	2.04676	2.07042	2.13179	2.13424	2.07878	NA	NA	NA	NA	NA	NA	2.15341	2.21028	2.29823	2.26568	2.18382	2.22879	NA	NA	NA	NA	NA	NA	NA	NA	NA	NA	2.0454	2.11494	NA	NA	2.22064	2.2261	NA	NA
ENSMUSG00000000489	Pdgfb	2.97727	2.87305	3.01878	2.89265	2.85325	2.9275	3.43714	3.45677	3.34418	3.41096	3.44594	3.4044	3.77591	3.78966	3.94957	3.87935	3.89836	3.81539	3.0824	3.09902	3.04103	3.09466	3.00402	3.05151	3.46931	3.28898	3.26935	3.36132	3.36329	3.194	2.83085	2.78862	2.76591	2.70982	2.81045	2.77469	2.95637	2.89113	3.4127	3.42044	3.83838	3.86437	3.07415	3.05006	3.34255	3.3062	2.79513	2.76499
ENSMUSG00000000530	Acvrl1	1.54636	1.6274	1.49581	1.60052	1.50243	1.49567	1.93771	1.88857	1.94863	1.8913	1.89182	1.89233	1.96439	1.9884	1.82139	1.91954	1.88246	1.80868	1.79517	1.78325	1.80454	1.77931	1.82513	1.82723	1.98149	1.96435	1.93498	1.93435	1.91725	1.91963	NA	NA	NA	NA	NA	NA	1.55652	1.53287	1.92497	1.89181	1.92473	1.87023	1.79432	1.81056	1.96027	1.92374	NA	NA
ENSMUSG00000000531	Grasp	2.23537	2.36762	2.21497	2.27597	2.33798	2.31773	3.17253	3.21553	3.12579	3.16715	3.17725	3.1723	2.75507	2.6897	2.84369	2.66107	2.71426	2.66634	3.214	3.19125	3.19415	3.16189	3.19595	3.19694	3.03075	2.9365	2.90626	2.96948	2.87276	2.89446	3.46243	3.34753	3.35841	3.37247	3.4161	3.44054	2.27265	2.31056	3.17128	3.17223	2.76282	2.68056	3.1998	3.18493	2.95784	2.91223	3.38945	3.4097
ENSMUSG00000000532	Acvr1b	8.14058	8.19932	8.22836	8.192	8.26989	8.30283	9.27755	9.41202	9.25338	9.19867	9.25501	9.25544	9.04942	9.58938	9.45372	9.25271	9.21645	9.14483	8.96256	8.91325	8.87788	8.82913	8.78915	8.78081	9.14413	9.24741	9.2422	9.07124	9.13335	9.13116	8.35214	8.32434	8.44154	8.26498	8.13342	8.31825	8.18942	8.2549	9.31432	9.23637	9.36418	9.20466	8.9179	8.79969	9.21125	9.11192	8.37267	8.23888
ENSMUSG00000000538	Tom1l2	9.54084	9.60866	9.406	9.36356	9.4349	9.38943	9.97653	9.85762	10.1851	9.99275	9.97273	10.0656	9.78427	9.83294	9.89823	9.80958	9.70561	9.71735	9.76103	9.71292	9.96343	9.82663	9.74241	9.91143	10.1258	9.84678	9.82814	9.86281	9.78742	9.80202	9.93002	9.80973	9.78716	9.72625	9.9947	9.92022	9.5185	9.39596	10.0064	10.0104	9.83848	9.74418	9.81246	9.82682	9.93357	9.81742	9.8423	9.88039
ENSMUSG00000000552	Zfp385a	9.1602	9.47767	9.22189	9.17674	9.26711	9.26565	9.99188	9.88242	9.95444	10.039	9.93012	9.94229	9.64101	9.59352	9.63133	9.80468	9.51147	9.50156	9.79462	9.77496	9.77539	9.72033	9.6626	9.86069	9.95538	9.9504	9.91378	9.94517	9.90506	9.97298	9.78652	9.68743	9.58335	9.39908	9.5432	9.68551	9.28659	9.2365	9.94291	9.97048	9.62196	9.6059	9.78166	9.74787	9.93986	9.94107	9.68576	9.5426
ENSMUSG00000000555	Itga5	2.04891	2.09504	2.16639	2.09739	2.13272	2.05709	3.26773	3.37896	3.29736	3.35064	3.30177	3.29437	3.73365	4.14059	3.93267	3.96215	3.94627	3.91182	3.02394	3.02796	3.02083	3.05267	3.05516	3.06514	4.02381	4.1301	4.03798	4.06177	3.85183	3.90808	3.28927	3.40827	3.36288	3.47379	3.39714	3.41893	2.10345	2.09573	3.31469	3.31559	3.93563	3.94008	3.02424	3.05766	4.06397	3.94056	3.35347	3.42995
ENSMUSG00000000560	Gabra2	5.88607	5.97541	6.57422	6.22059	6.2089	6.31651	6.80717	6.9565	6.67697	6.83304	6.85562	6.76341	7.7047	7.66607	7.48134	7.24055	7.58317	7.31973	6.96786	6.81355	6.65607	6.69027	6.8781	6.78496	7.22489	7.87756	7.35608	7.14692	7.15778	7.0119	6.23083	6.31862	6.1906	6.20147	6.07145	6.06794	6.14523	6.24867	6.81354	6.81736	7.61737	7.38115	6.8125	6.78444	7.48618	7.10553	6.24668	6.11362
ENSMUSG00000000563	Atp5pb	9.46342	9.73335	9.7143	9.61785	9.63046	9.64679	10.5878	10.5195	10.5202	10.5675	10.507	10.4754	10.0655	9.99561	10.0517	10.0826	9.94664	9.97307	10.4534	10.3361	10.2119	10.3448	10.4246	10.3275	10.5328	10.4708	10.4445	10.5924	10.5192	10.6101	10.0881	10.0922	10.052	10.072	9.96583	9.9696	9.63702	9.6317	10.5425	10.5166	10.0376	10.0008	10.3338	10.3656	10.4827	10.5739	10.0774	10.0025
ENSMUSG00000000567	Sox9	3.78709	3.83945	3.7358	3.80793	3.99222	3.88881	4.45216	4.43417	4.3986	4.42137	4.42438	4.47288	3.70189	3.79637	3.54497	3.56681	3.58959	3.57812	3.82903	3.83764	4.07856	3.87667	3.96831	3.84457	4.24702	4.22846	4.25309	4.22537	4.20222	4.15785	4.69728	4.61346	4.54421	4.5709	4.84472	4.73244	3.78745	3.89632	4.42831	4.43954	3.68108	3.57817	3.91507	3.89652	4.24286	4.19515	4.61832	4.71602
ENSMUSG00000000568	Hnrnpd	9.19178	9.23724	9.76988	9.38537	9.22585	9.17283	10.1818	10.1837	10.1541	10.2709	10.1416	10.2131	9.82051	9.65068	9.65576	9.63325	9.63149	9.6201	10.2445	10.1978	10.098	10.1916	10.2977	10.1445	10.3703	10.4964	10.3821	10.4456	10.4518	10.5884	9.96805	10.05	9.9259	9.94419	9.77233	9.84883	9.39963	9.26135	10.1732	10.2085	9.70899	9.62828	10.1801	10.2112	10.4163	10.4953	9.98132	9.85512
ENSMUSG00000000581	C1d	7.3584	7.5489	7.83581	7.66319	7.54407	7.32767	8.34973	8.41991	8.30739	8.41815	8.37583	8.50225	8.20357	8.04259	8.14044	8.12177	8.09719	8.26447	8.187	8.1282	8.21434	8.23253	8.31143	8.18388	8.31645	8.67274	8.65689	8.62828	8.64288	8.69328	7.8458	7.85763	7.8914	7.91672	7.82884	7.88264	7.58104	7.51164	8.35901	8.43208	8.12886	8.16115	8.17652	8.24261	8.5487	8.65482	7.86495	7.87607
ENSMUSG00000000594	Gm2a	7.7731	7.81455	7.84143	7.72839	7.79324	7.88785	8.7454	8.95998	8.78369	8.73437	8.77135	8.88213	8.51115	9.2229	9.05831	9.20691	8.9887	9.04796	8.39265	8.42243	8.35878	8.46411	8.39254	8.30697	8.67413	9.06527	9.15776	9.01001	8.94184	9.07191	7.86809	8.13055	7.99647	7.85449	7.76981	7.76558	7.80969	7.80316	8.82969	8.79595	8.93078	9.08119	8.39129	8.38788	8.96572	9.00792	7.99837	7.79663
ENSMUSG00000000600	Krit1	6.75257	7.06079	7.17936	7.12558	7.00709	6.79782	7.96261	7.77419	7.74728	7.95939	7.88041	7.91355	7.33608	7.06182	7.01523	7.20947	7.17023	7.23768	7.82633	7.69816	7.81394	7.73259	7.83222	7.8733	7.85166	7.77574	7.82735	8.05486	8.05562	7.77969	7.38249	7.42756	7.4703	7.44211	7.29666	7.55113	6.99758	6.97683	7.82803	7.91778	7.13771	7.2058	7.77947	7.8127	7.81825	7.96339	7.42678	7.42997
ENSMUSG00000000605	Clcn4	9.70559	9.68776	9.66887	9.68383	9.80882	9.85916	10.786	11.1221	10.7113	10.8265	10.9118	10.7531	10.74	11.4684	11.1744	11.1716	11.1541	11.1732	10.378	10.4523	10.3101	10.4462	10.2778	10.2899	10.8276	10.9033	11.1523	10.6652	10.7671	10.7136	9.93063	9.93612	9.96522	9.97885	9.90386	9.93685	9.6874	9.78394	10.8731	10.8305	11.1276	11.1663	10.3801	10.338	10.9611	10.7153	9.94399	9.93986
ENSMUSG00000000627	Sema4f	6.26478	6.22675	6.21417	6.22947	6.30819	6.19682	7.22602	7.33309	7.09183	7.31869	7.13834	7.1707	7.08731	7.71377	7.50433	7.32655	7.2763	7.36238	6.8344	6.77307	6.87001	6.94258	6.80379	6.7536	7.25757	7.60142	7.69181	7.31331	7.24769	7.23392	6.30108	6.39638	6.26794	6.31801	6.29755	6.42299	6.23523	6.24483	7.21698	7.20924	7.43514	7.32175	6.82582	6.83332	7.51693	7.26498	6.3218	6.34618
ENSMUSG00000000628	Hk2	NA	NA	NA	NA	NA	NA	1.94441	1.99111	1.95339	1.99555	2.02294	1.96095	NA	NA	NA	NA	NA	NA	NA	NA	NA	NA	NA	NA	NA	NA	NA	NA	NA	NA	NA	NA	NA	NA	NA	NA	NA	NA	1.96297	1.99314	NA	NA	NA	NA	NA	NA	NA	NA
ENSMUSG00000000631	Myo18a	7.40485	7.14998	6.92435	7.18534	7.31704	7.27938	7.96111	8.20247	8.11274	8.00548	8.11808	8.05209	7.68851	7.69023	7.62808	7.67864	7.73544	7.54202	7.5101	7.48835	7.65084	7.54127	7.41603	7.48223	7.62682	7.44382	7.63357	7.5995	7.57805	7.41129	7.6638	7.75026	7.63431	7.5661	7.79905	7.86359	7.15973	7.26058	8.09211	8.05855	7.66894	7.65203	7.54976	7.47984	7.56807	7.52961	7.68279	7.74291
ENSMUSG00000000632	Sez6	8.37796	8.39897	8.12641	8.36442	8.61995	8.67508	9.80549	9.94596	9.54521	9.80343	9.7362	9.6258	9.8556	10.6716	10.5631	10.2331	10.2762	10.2191	9.64111	9.70211	9.52084	9.77777	9.7078	9.46685	10.1445	10.6417	10.6121	10.2089	10.1196	10.6091	9.62438	9.98373	9.51477	9.5074	9.44992	9.6358	8.30112	8.55315	9.76555	9.72181	10.3634	10.2428	9.62135	9.65081	10.4661	10.3125	9.70763	9.53104
ENSMUSG00000000682	Cd52	NA	NA	NA	NA	NA	NA	NA	NA	NA	NA	NA	NA	NA	NA	NA	NA	NA	NA	NA	NA	NA	NA	NA	NA	NA	NA	NA	NA	NA	NA	2.55087	2.56995	2.61971	2.70496	2.63912	2.6579	NA	NA	NA	NA	NA	NA	NA	NA	NA	NA	2.58017	2.66733
ENSMUSG00000000690	Hoxb6	NA	NA	NA	NA	NA	NA	NA	NA	NA	NA	NA	NA	2.11154	2.00832	2.19907	2.02998	2.06393	2.15937	NA	NA	NA	NA	NA	NA	2.45197	2.38557	2.40391	2.27953	2.40407	2.39535	2.56001	2.62424	2.48426	2.53063	2.56747	2.59885	NA	NA	NA	NA	2.10631	2.08443	NA	NA	2.41382	2.35965	2.55617	2.56565
ENSMUSG00000000693	Loxl3	NA	NA	NA	NA	NA	NA	1.79383	1.77346	1.75096	1.73937	1.7961	1.7729	NA	NA	NA	NA	NA	NA	NA	NA	NA	NA	NA	NA	NA	NA	NA	NA	NA	NA	NA	NA	NA	NA	NA	NA	NA	NA	1.77275	1.76946	NA	NA	NA	NA	NA	NA	NA	NA
ENSMUSG00000000706	Btn1a1	1.56903	1.57555	1.47978	1.50897	1.51053	1.53488	2.29179	2.30783	2.29737	2.30351	2.31367	2.32538	2.71379	3.03149	2.79639	2.98441	2.86625	2.79534	NA	NA	NA	NA	NA	NA	3.00609	3.11556	3.14576	3.12932	3.17569	3.21401	NA	NA	NA	NA	NA	NA	1.54145	1.51813	2.299	2.31419	2.84722	2.882	NA	NA	3.08913	3.17301	NA	NA
ENSMUSG00000000708	Kat2b	6.53436	6.74637	6.81814	6.6737	6.80212	6.74188	7.69143	7.63797	7.66258	7.63496	7.66701	7.66299	7.17717	7.06422	7.15748	7.02743	7.06991	7.36355	7.5629	7.52587	7.50769	7.50658	7.41379	7.41567	7.2656	7.63773	7.78769	7.72788	7.74385	7.73614	6.74858	6.89163	7.05682	6.98396	6.82492	6.93008	6.69962	6.73923	7.66399	7.65499	7.13295	7.15363	7.53215	7.44535	7.56367	7.73596	6.89901	6.91299
ENSMUSG00000000711	Rab5b	5.99746	5.93714	5.89415	6.11692	6.12356	6.08285	7.03282	7.11268	7.09931	7.07435	7.096	7.0483	6.6005	6.39626	6.43835	6.54752	6.58215	6.48431	6.59797	6.59325	6.48974	6.43301	6.55185	6.48496	6.52267	6.69058	6.71646	6.86584	6.74309	6.83633	6.09944	6.08201	6.12341	6.03378	6.15869	6.06559	5.94292	6.10778	7.0816	7.07288	6.47837	6.53799	6.56032	6.48994	6.64324	6.81509	6.10162	6.08602
ENSMUSG00000000732	Icosl	NA	NA	NA	NA	NA	NA	2.78968	2.77481	2.71091	2.71324	2.71416	2.71166	2.42451	2.64929	2.45468	2.49572	2.64757	2.52812	2.3396	2.29839	2.27924	2.28993	2.32183	2.29058	2.71172	2.69298	2.82124	2.72677	2.74405	2.73164	2.5693	2.50634	2.49426	2.6662	2.58852	2.51538	NA	NA	2.75847	2.71302	2.50949	2.55714	2.30574	2.30078	2.74198	2.73415	2.5233	2.59003
ENSMUSG00000000738	Spg7	6.93695	6.73082	6.80064	6.81124	6.78285	6.95434	7.58063	7.73926	7.69096	7.53247	7.63956	7.66751	7.42175	7.59786	7.54443	7.6697	7.55715	7.51949	7.20828	7.27916	7.37306	7.27417	7.19716	7.16139	7.53094	7.65624	7.68369	7.65934	7.61658	7.6043	7.10578	7.11438	7.1399	6.97289	7.08754	7.08708	6.8228	6.84948	7.67028	7.61318	7.52134	7.58211	7.28683	7.21091	7.62362	7.62674	7.12002	7.04917
ENSMUSG00000000740	Rpl13	2.88253	2.99907	3.2073	2.88775	2.98532	2.8892	3.70954	3.67045	3.68498	3.70535	3.69925	3.69189	3.57986	3.53455	3.51955	3.72836	3.63222	3.60768	3.68323	3.69943	3.76976	3.70064	3.7135	3.63534	3.55878	3.61103	3.67081	3.62609	3.72623	3.79028	3.18037	3.25798	3.31681	3.29025	3.19975	3.2058	3.02963	2.92076	3.68832	3.69883	3.54465	3.65609	3.71747	3.68316	3.61354	3.7142	3.25172	3.23194
ENSMUSG00000000743	Chmp1a	6.35427	6.4095	6.39514	6.43088	6.54724	6.48075	7.28562	7.3274	7.26859	7.23771	7.11985	7.19388	6.93056	6.7555	6.74035	6.77207	6.77673	6.93131	6.89083	6.81847	6.74665	6.92156	6.85408	6.83076	7.17205	7.14439	7.16485	7.18717	7.04489	7.19595	6.60998	6.83243	6.66702	6.63382	6.68903	6.61988	6.3863	6.48629	7.29387	7.18381	6.8088	6.8267	6.81865	6.8688	7.16043	7.14267	6.70314	6.64758
ENSMUSG00000000751	Rpa1	8.0994	8.09917	7.97862	7.98128	7.88549	7.96373	8.62865	8.51782	8.74473	8.55942	8.58684	8.60836	8.19606	8.3109	8.45257	8.4332	8.32404	8.33031	8.55303	8.5164	8.68856	8.64597	8.59864	8.73533	8.74325	8.4917	8.60407	8.63696	8.63799	8.56652	8.79058	8.6752	8.69274	8.72075	8.74439	8.72992	8.05906	7.9435	8.6304	8.58488	8.31984	8.36252	8.586	8.65998	8.61301	8.61382	8.7195	8.73169
ENSMUSG00000000753	Serpinf1	6.93711	7.04554	6.99585	7.08254	7.12514	7.2551	8.19569	8.44082	8.15115	8.20232	8.16295	8.23325	8.47012	8.99025	8.69332	8.4952	8.77453	8.45753	7.81817	7.88976	7.54626	7.91627	7.7238	7.69546	8.30925	8.41169	8.5735	8.09952	8.11427	8.14184	7.58573	7.49832	7.59635	7.59233	7.52816	7.50704	6.99283	7.15426	8.26255	8.19951	8.7179	8.57575	7.7514	7.77851	8.43148	8.11855	7.56013	7.54251
ENSMUSG00000000759	Tubgcp3	6.45393	6.35246	6.29574	6.32885	6.25552	6.30778	6.96007	6.852	6.92053	7.01512	6.91659	7.02189	6.50785	6.30616	6.11248	6.33893	6.11305	6.15425	6.97087	6.87162	7.13664	6.85672	6.84371	6.91416	6.94885	6.924	6.78836	6.82923	7.04077	6.88429	6.44253	6.28258	6.35419	6.45563	6.48576	6.41409	6.36738	6.29738	6.91087	6.98453	6.30883	6.20208	6.99304	6.87153	6.88707	6.9181	6.35977	6.45182
ENSMUSG00000000766	Oprm1	4.87091	4.9224	4.90575	5.14287	5.05718	5.07549	6.05746	6.31719	6.00263	6.09069	6.12154	6.00692	6.38149	6.79848	6.78191	6.36853	6.63836	6.47211	6.09452	6.04348	5.76636	6.06125	6.04652	5.92442	6.98739	6.89191	7.18821	6.45295	6.56932	6.70936	6.1149	6.20997	5.99304	6.32602	6.08084	6.11447	4.89969	5.09184	6.12576	6.07305	6.65396	6.493	5.96812	6.01073	7.0225	6.57721	6.10597	6.17378
ENSMUSG00000000776	Polr3d	5.94721	5.80334	5.7121	5.67992	5.70567	5.78527	6.3629	6.35088	6.38869	6.44791	6.34065	6.4458	6.26256	6.063	5.80231	6.0023	5.9271	6.00589	6.39248	6.41682	6.36038	6.28739	6.24494	6.30091	6.4721	6.38312	6.36921	6.28179	6.3004	6.386	6.18147	6.20523	6.11911	6.17258	6.15294	6.16754	5.82088	5.72362	6.36749	6.41145	6.04262	5.97843	6.3899	6.27775	6.40815	6.32273	6.1686	6.16435
ENSMUSG00000000782	Tcf7	NA	NA	NA	NA	NA	NA	NA	NA	NA	NA	NA	NA	NA	NA	NA	NA	NA	NA	NA	NA	NA	NA	NA	NA	2.47292	2.35945	2.34364	2.37746	2.30792	2.29225	NA	NA	NA	NA	NA	NA	NA	NA	NA	NA	NA	NA	NA	NA	2.392	2.32588	NA	NA
ENSMUSG00000000787	Ddx3x	9.65898	9.31765	9.39509	9.56242	9.41853	9.32831	10.0086	10.183	9.99071	10.0666	10.2056	10.268	9.94796	9.91503	9.90039	9.94338	9.89098	10.095	10.0934	9.92921	10.3069	10.0886	10.3469	10.3424	10.4175	10.176	10.1062	10.3878	10.1337	10.2081	10.3974	10.447	10.1504	10.4275	10.4281	10.155	9.45724	9.43642	10.0608	10.1801	9.92113	9.97645	10.1099	10.2593	10.2332	10.2432	10.3316	10.3369
ENSMUSG00000000792	Slc5a5	2.88665	2.76787	2.79743	2.80936	2.86634	2.84205	3.72801	3.73278	3.63971	3.72221	3.70843	3.63815	3.77272	3.8027	3.63722	3.68867	3.82636	3.69509	3.67034	3.63429	3.64116	3.59809	3.66167	3.61066	4.02611	3.97781	3.99452	3.97891	3.88199	4.03424	3.78852	3.8674	3.86698	3.83235	3.88242	3.84421	2.81732	2.83925	3.70016	3.6896	3.73755	3.73671	3.6486	3.62347	3.99948	3.96504	3.84097	3.85299
ENSMUSG00000000794	Kcnn3	3.02051	3.04191	2.99759	3.10158	3.1015	3.00379	3.74319	3.77415	3.73989	3.74776	3.75795	3.68076	3.86605	4.01732	3.91194	3.78184	4.05474	4.06694	3.82493	3.78182	3.78588	3.75961	3.75528	3.75055	4.19196	4.3063	4.21895	4.11092	4.16755	4.06266	3.77464	3.82831	3.85339	3.78255	3.93328	3.81592	3.02	3.06896	3.75241	3.72882	3.93177	3.96784	3.79754	3.75515	4.23907	4.11371	3.81878	3.84392
ENSMUSG00000000804	Usp32	8.6116	8.49738	8.46466	8.55286	8.50106	8.578	9.25556	9.36903	9.39735	9.27	9.42641	9.23116	8.92742	8.72295	8.74439	8.77468	8.89523	8.94853	9.02241	9.05294	8.9438	9.16098	8.99601	9.09123	9.18821	9.08919	9.12119	9.17364	9.23778	9.13	8.43554	8.59129	8.66921	8.63984	8.60935	8.55694	8.52454	8.54397	9.34065	9.30919	8.79825	8.87281	9.00639	9.08274	9.13286	9.18047	8.56535	8.60204
ENSMUSG00000000805	Car4	7.89889	7.64895	7.8918	7.83355	7.92552	8.08513	8.5387	8.88512	8.54748	8.58182	8.70354	8.42267	8.68147	9.08096	9.15102	8.24395	8.91844	8.88334	8.29481	8.28069	8.40362	8.39295	8.41793	8.21803	8.86144	8.85411	8.85574	8.62983	8.41057	8.60464	7.6798	7.70445	7.64704	7.46685	7.13386	7.52411	7.81321	7.94806	8.6571	8.56934	8.97115	8.68191	8.32637	8.34297	8.8571	8.54835	7.6771	7.37494
ENSMUSG00000000811	Txnrd3	4.77879	4.70132	4.71973	4.67765	4.61177	4.56532	5.21784	5.20877	5.41064	5.27044	5.26218	5.32145	4.5579	4.28075	4.30758	4.34102	4.38787	4.29792	5.19548	5.21102	5.31913	5.30159	5.23145	5.19367	4.76781	4.83815	4.86436	4.90481	5.08626	4.932	4.8979	4.75429	4.67921	4.87833	4.79027	4.70082	4.73328	4.61825	5.27908	5.28469	4.38208	4.34227	5.24187	5.24223	4.82344	4.97436	4.77713	4.78981
ENSMUSG00000000823	Zfp512b	5.13439	4.94553	5.15607	4.97826	4.98478	5.10531	5.62415	5.49665	5.59829	5.54062	5.57503	5.52892	5.31572	5.14486	5.07399	5.1457	4.94582	5.18124	5.27931	5.14789	5.34772	5.23799	5.16281	5.2425	5.15773	5.25642	5.16562	5.22052	5.17616	5.10823	5.12331	5.05739	5.25722	4.87877	5.10842	5.07953	5.07867	5.02278	5.57303	5.54819	5.17819	5.09092	5.25831	5.21444	5.19326	5.1683	5.14597	5.02224
ENSMUSG00000000826	Dnajc5	9.99219	9.88987	10.0949	9.80352	9.94127	9.86046	10.4618	10.4624	10.6644	10.4996	10.4677	10.6265	10.2003	10.2811	10.3003	10.1827	10.1744	10.2076	10.3901	10.4046	10.515	10.569	10.4102	10.4182	10.91	10.707	10.6613	10.6878	10.6588	10.7268	10.232	10.1768	10.2172	10.1012	10.1833	10.1556	9.99232	9.86842	10.5295	10.5313	10.2606	10.1882	10.4366	10.4658	10.7595	10.6911	10.2087	10.1467
ENSMUSG00000000827	Tpd52l2	7.85999	7.88939	7.93895	7.71843	7.72394	7.78696	8.51758	8.40319	8.52699	8.45981	8.39154	8.39861	7.9841	7.93245	7.91656	7.9303	8.02418	7.97172	8.34608	8.35382	8.38312	8.21403	8.27445	8.24283	8.71948	8.32315	8.36688	8.36461	8.48484	8.49256	8.18496	8.01108	8.12225	8.02055	8.06362	7.91986	7.89611	7.74311	8.48259	8.41665	7.94437	7.9754	8.36101	8.24377	8.46984	8.44734	8.1061	8.00134
ENSMUSG00000000838	Fmr1	7.25438	7.4586	7.52599	7.56789	7.46512	7.45086	8.29237	8.26318	8.35866	8.2981	8.3414	8.29504	7.91059	7.94337	7.97551	8.00925	8.10178	7.92585	8.02271	7.9566	8.00944	8.05593	8.08675	8.04869	8.37425	8.41513	8.25942	8.34253	8.31685	8.34155	7.79124	7.77929	7.79844	7.60424	7.63095	7.62389	7.41299	7.49462	8.30473	8.31151	7.94316	8.01229	7.99625	8.06379	8.3496	8.33365	7.78966	7.61969
ENSMUSG00000000861	Bcl11a	7.23796	7.38066	7.42038	7.26035	7.27956	7.35218	8.06437	8.15877	8.15316	8.15411	8.14344	8.22225	7.67792	7.53441	7.44236	7.80312	7.55099	7.57474	7.7831	7.82523	7.8183	7.77567	7.79488	7.7718	7.70024	7.76502	7.88844	7.96821	8.09429	7.95619	7.34474	7.22621	7.33509	7.21259	7.20868	7.21093	7.34633	7.29736	8.12543	8.17326	7.55157	7.64295	7.80888	7.78078	7.78457	8.00623	7.30201	7.21073
ENSMUSG00000000876	Pxmp4	3.47956	3.59992	3.54575	3.53795	3.59583	3.48127	4.16231	4.11832	4.03498	4.09451	4.08103	4.12246	3.76331	3.53354	3.67908	3.78663	3.55369	3.72031	3.51505	3.63019	3.51113	3.58957	3.57075	3.52699	3.85861	3.85616	3.86979	3.96103	3.91117	3.83487	3.78583	3.85213	3.86826	3.90149	3.9486	3.88151	3.54174	3.53835	4.1052	4.09934	3.65864	3.68688	3.55212	3.56243	3.86152	3.90235	3.83541	3.91053
ENSMUSG00000000881	Dlg3	7.5938	7.51993	7.48067	7.38015	7.47427	7.61441	8.22164	8.18354	8.2726	8.19114	8.21822	8.25593	7.94825	8.02511	8.13799	7.98488	8.07974	8.06603	8.06233	8.03607	8.29462	8.07229	8.12304	8.208	8.5342	8.53273	8.40927	8.40871	8.34009	8.43951	8.26151	8.34206	8.22788	8.01242	8.16726	8.25316	7.53147	7.48961	8.22592	8.22176	8.03712	8.04355	8.131	8.13444	8.49207	8.3961	8.27715	8.14428
ENSMUSG00000000884	Gnb1l	2.1401	2.20222	2.17539	2.20771	2.23747	2.19468	3.01252	2.92907	2.95051	2.99585	2.93578	2.94255	2.44774	2.25617	2.30983	2.38296	2.36724	2.2497	2.90768	2.91808	2.9655	2.86834	2.8803	2.90475	3.40885	3.18585	3.11365	3.1788	3.16412	3.07123	2.54267	2.52216	2.51874	2.55334	2.53725	2.58099	2.17257	2.21329	2.96403	2.95806	2.33791	2.3333	2.93042	2.88447	3.23612	3.13805	2.52786	2.55719
ENSMUSG00000000889	Dbh	NA	NA	NA	NA	NA	NA	1.73795	1.69138	1.73317	1.71206	1.72192	1.68695	NA	NA	NA	NA	NA	NA	NA	NA	NA	NA	NA	NA	NA	NA	NA	NA	NA	NA	NA	NA	NA	NA	NA	NA	NA	NA	1.72083	1.70698	NA	NA	NA	NA	NA	NA	NA	NA
ENSMUSG00000000902	Smarcb1	8.26149	8.01135	7.94858	7.88809	7.79849	7.84029	8.52923	8.304	8.54026	8.49604	8.38954	8.53643	8.12587	8.14321	8.23037	8.15707	8.0768	8.14312	8.39366	8.3362	8.55565	8.47113	8.37566	8.52864	8.56808	8.40128	8.38259	8.51634	8.49122	8.37834	8.37514	8.23839	8.32856	8.17583	8.26858	8.23584	8.07381	7.84229	8.45783	8.474	8.16648	8.12566	8.4285	8.45848	8.45065	8.46197	8.31403	8.22675
ENSMUSG00000000915	Hip1r	7.30079	7.08257	7.07022	7.05358	7.16368	7.09173	7.78799	7.68768	7.83067	7.72625	7.75755	7.83084	7.34142	7.10155	7.08952	7.1926	7.09889	7.1776	7.36465	7.43529	7.47523	7.46779	7.3939	7.47375	7.70649	7.57857	7.62884	7.81818	7.65833	7.63213	7.4368	7.29428	7.41359	7.35397	7.47832	7.45734	7.15119	7.103	7.76878	7.77155	7.1775	7.15637	7.42506	7.44515	7.63797	7.70288	7.38156	7.42988
ENSMUSG00000000916	Nsun5	3.61276	3.30902	3.31101	3.34696	3.36422	3.43457	3.82081	3.81123	3.80064	3.86961	3.80954	3.72836	3.76096	3.78809	3.60603	3.85326	3.67974	3.74968	3.56046	3.49161	3.54703	3.48207	3.51759	3.61439	3.52414	3.56556	3.53892	3.52265	3.46418	3.54781	3.53708	3.53895	3.51584	3.5684	3.55061	3.50612	3.41093	3.38191	3.81089	3.8025	3.71836	3.76089	3.53303	3.53801	3.54287	3.51155	3.53062	3.54171
ENSMUSG00000000934	Top1mt	4.28922	4.41487	4.31479	4.27833	4.2776	4.24551	4.65879	4.7085	4.70355	4.74854	4.78022	4.81086	4.35438	4.21846	4.45467	4.37059	4.33801	4.33041	4.31865	4.35401	4.4838	4.42647	4.32374	4.38964	4.56272	4.51786	4.50252	4.61624	4.51517	4.48263	3.89103	3.87204	3.85347	3.89698	3.91208	3.86007	4.33963	4.26715	4.69028	4.77987	4.34251	4.34634	4.38548	4.37995	4.5277	4.53802	3.87218	3.88971
ENSMUSG00000000942	Hoxa4	NA	NA	NA	NA	NA	NA	2.13029	2.15224	2.07582	2.09403	2.11347	2.14158	NA	NA	NA	NA	NA	NA	NA	NA	NA	NA	NA	NA	2.50043	2.50419	2.5688	2.50336	2.50438	2.49736	NA	NA	NA	NA	NA	NA	NA	NA	2.11945	2.11636	NA	NA	NA	NA	2.52447	2.5017	NA	NA
ENSMUSG00000000948	Gm38393	NA	NA	NA	NA	NA	NA	NA	NA	NA	NA	NA	NA	1.90931	1.91614	1.97486	1.91188	2.00371	1.91244	NA	NA	NA	NA	NA	NA	NA	NA	NA	NA	NA	NA	NA	NA	NA	NA	NA	NA	NA	NA	NA	NA	1.93344	1.94268	NA	NA	NA	NA	NA	NA
ENSMUSG00000000957	Mmp14	3.98126	4.14765	4.29237	4.06202	4.03648	4.07062	5.14699	5.20954	5.00417	5.16934	5.14189	5.15633	5.22085	5.70051	5.31514	5.54772	5.46179	5.40598	4.53678	4.5554	4.6013	4.59456	4.47317	4.49938	4.95644	5.26817	5.44364	5.13881	5.09066	5.07669	4.14112	4.24628	4.31567	4.21834	4.17644	4.34977	4.14043	4.05638	5.12023	5.15585	5.41217	5.47183	4.5645	4.52237	5.22275	5.10206	4.23436	4.24818
ENSMUSG00000000959	Oxa1l	7.31942	7.16023	7.13564	7.11094	7.22477	7.15765	7.63448	7.68948	7.76217	7.68663	7.68887	7.70416	7.28768	7.1454	6.95641	7.16964	7.20828	7.17939	7.42972	7.50572	7.476	7.40448	7.39359	7.52568	7.78505	7.60892	7.52989	7.65816	7.5953	7.70621	7.52806	7.41431	7.3688	7.37923	7.4891	7.60606	7.2051	7.16445	7.69538	7.69322	7.12983	7.18577	7.47048	7.44125	7.64129	7.65322	7.43706	7.49146
ENSMUSG00000000976	Heatr6	5.70945	5.69801	5.65235	5.53809	5.45134	5.47741	6.16505	6.01164	6.08996	6.11295	6.01888	6.0982	5.20748	5.02896	5.07535	4.97468	5.02328	4.95523	5.75036	5.64477	5.81243	5.71602	5.65152	5.68211	5.60583	5.46258	5.47437	5.64971	5.58971	5.53393	5.21503	5.19264	5.18832	5.14841	5.19058	5.22154	5.6866	5.48895	6.08888	6.07668	5.10393	4.9844	5.73585	5.68321	5.51426	5.59112	5.19866	5.18684
ENSMUSG00000001016	Ilf2	8.90835	8.47026	8.47255	8.49841	8.54741	8.49408	9.12275	8.99112	9.20079	9.15772	9.08498	9.04893	8.5114	8.36698	8.38807	8.51093	8.38513	8.41037	8.92648	8.79426	9.09691	8.85113	8.80574	8.98832	8.98205	8.57188	8.71351	8.89265	8.86194	8.7921	8.63888	8.53922	8.66263	8.83651	8.78412	8.73707	8.61705	8.5133	9.10489	9.09721	8.42215	8.43547	8.93922	8.88173	8.75581	8.8489	8.61358	8.7859
ENSMUSG00000001017	Chtop	8.32322	8.36043	8.2969	8.22547	8.22989	8.27441	8.98373	8.91478	8.98345	8.99486	8.97593	9.00322	8.78136	8.6745	8.68999	8.7393	8.75411	8.68841	8.64963	8.77642	8.6386	8.55521	8.7397	8.69905	8.99981	9.00856	8.95029	8.98516	8.94853	8.98411	8.58587	8.54914	8.43242	8.4692	8.48357	8.40756	8.32685	8.24326	8.96065	8.99134	8.71528	8.72728	8.68822	8.66465	8.98622	8.9726	8.52248	8.45344
ENSMUSG00000001018	Snapin	6.16397	5.9378	5.82552	5.85813	5.94478	5.94259	6.77483	6.80347	6.74198	6.77349	6.80024	6.85601	6.58335	6.61459	6.66155	6.69846	6.55489	6.73615	6.5046	6.4538	6.3829	6.51481	6.54784	6.37792	6.86076	6.89499	7.02873	6.9885	6.82904	7.06706	6.32661	6.53326	6.43107	6.35087	6.41804	6.45372	5.97576	5.91517	6.77343	6.80991	6.61983	6.66316	6.4471	6.48019	6.92816	6.96154	6.43031	6.40754
ENSMUSG00000001025	S100a6	2.82734	2.77312	2.97054	2.87629	2.92652	2.88488	3.70911	3.69464	3.65789	3.7057	3.68239	3.7681	3.34796	3.04277	3.11996	2.9707	3.02414	3.12933	3.35473	3.33243	3.28097	3.32046	3.29455	3.2999	3.4607	3.43128	3.54822	3.57419	3.59016	3.4253	4.07056	3.96345	4.09163	4.30871	4.34582	4.17429	2.857	2.89589	3.68721	3.71873	3.17023	3.04139	3.32271	3.30497	3.48007	3.52988	4.04188	4.27627
ENSMUSG00000001034	Mapk7	2.36111	2.41663	2.33934	2.45263	2.49381	2.46816	3.70041	3.70682	3.65486	3.66251	3.63023	3.68693	3.29863	3.30516	3.21577	3.18014	3.1771	3.33924	3.09551	3.15698	3.12228	3.07962	3.13268	3.11468	3.59844	3.60413	3.71472	3.61533	3.58773	3.68728	2.76672	2.8298	2.86333	2.86655	2.77494	2.75482	2.37236	2.47153	3.68736	3.65989	3.27319	3.23216	3.12493	3.10899	3.63909	3.63011	2.81995	2.79877
ENSMUSG00000001036	Epn2	7.24375	6.86826	6.97383	6.85125	7.00214	6.91755	7.53479	7.36861	7.52163	7.50105	7.43357	7.44842	7.01829	6.88166	6.92392	6.60819	6.97938	6.8919	7.20224	6.9945	7.30835	7.17436	7.19274	7.1694	7.11622	6.98275	7.01954	7.14399	7.05565	6.92341	6.93788	6.69283	6.98104	6.68455	6.73004	6.79763	7.02861	6.92365	7.47501	7.46102	6.94129	6.82649	7.16836	7.17884	7.0395	7.04102	6.87058	6.73741
ENSMUSG00000001039	B9d1	4.34354	3.99652	3.93874	4.04873	4.01949	3.99229	4.64444	4.68968	4.71416	4.70205	4.69144	4.68554	4.45384	4.37708	4.43354	4.52777	4.57297	4.34317	4.35935	4.46677	4.41229	4.45596	4.41041	4.39993	4.81299	4.78971	4.70457	4.82602	4.84043	4.70103	3.90695	3.96139	3.88432	3.94999	4.07318	4.0346	4.09293	4.02017	4.68276	4.69301	4.42149	4.4813	4.41281	4.4221	4.76909	4.78916	3.91755	4.01926
ENSMUSG00000001052	Sec24b	7.19077	7.13122	7.10475	7.0709	7.05805	6.9758	7.97306	7.80104	7.95386	7.88151	7.89139	7.95688	7.42429	7.68407	7.67671	7.65554	7.60765	7.48852	7.7995	7.6689	7.79723	7.63249	7.77983	7.76362	7.93819	7.86924	7.87668	7.92162	7.88595	7.97163	8.14248	8.11521	7.97035	8.14511	8.08225	8.22985	7.14225	7.03492	7.90932	7.90993	7.59502	7.5839	7.75521	7.72532	7.8947	7.9264	8.07602	8.15241
ENSMUSG00000001053	N4bp3	4.23438	4.21745	4.069	4.23985	4.23452	4.23339	4.95817	4.95806	4.9482	5.01244	4.90226	4.92689	4.87712	4.75318	4.92626	4.81232	4.80357	4.86671	4.89485	4.82463	4.8687	4.86288	4.89546	5.00147	5.06434	4.83713	4.84896	4.93222	4.75557	4.83406	4.71066	4.64558	4.50843	4.64157	4.63101	4.59394	4.17361	4.23592	4.95481	4.9472	4.85219	4.82754	4.86273	4.91993	4.91681	4.84062	4.62156	4.62218
ENSMUSG00000001054	Rmnd5b	5.77405	5.66188	5.56524	5.7148	5.65613	5.6951	6.44626	6.27057	6.45969	6.39538	6.3539	6.24378	5.8855	5.87716	5.8156	5.82179	5.66273	5.83557	5.93482	5.91234	5.93232	5.87201	5.91418	5.99467	6.01037	6.11884	5.99688	6.13127	5.97506	6.03502	5.91935	5.94816	5.99027	5.99778	6.185	6.12634	5.66706	5.68867	6.39218	6.33102	5.85942	5.77336	5.92649	5.92695	6.04203	6.04712	5.95259	6.10304
ENSMUSG00000001056	Nhp2	6.08335	6.0354	5.74233	5.97704	6.08569	5.89411	6.54738	6.58012	6.74455	6.702	6.67901	6.68248	6.26186	6.18883	6.23811	6.24835	6.14422	6.38138	6.4865	6.4037	6.38541	6.32832	6.41619	6.33516	6.45961	6.51596	6.49379	6.61474	6.42226	6.58509	6.10977	6.08016	6.08017	5.94024	6.07485	6.04892	5.95369	5.98561	6.62402	6.68783	6.2296	6.25798	6.4252	6.35989	6.48979	6.54069	6.09004	6.02134
ENSMUSG00000001062	Vps9d1	5.53143	5.64277	5.54653	5.4672	5.40756	5.4249	5.98195	5.94179	6.02893	5.96915	5.91716	5.98453	5.52105	5.58676	5.60542	5.5193	5.51389	5.39497	5.89375	5.76855	5.87729	5.69199	5.71993	5.87593	5.86473	5.75082	5.71717	5.81766	5.83802	5.78372	5.47448	5.45047	5.47952	5.41016	5.47222	5.46737	5.57358	5.43322	5.98422	5.95695	5.57108	5.47606	5.84653	5.76262	5.77757	5.81314	5.46816	5.44992
ENSMUSG00000001065	Zfp276	2.81121	2.9268	2.93892	2.85948	2.92477	2.91792	3.71698	3.71162	3.80126	3.6633	3.73308	3.70434	2.83631	2.82933	2.93226	2.80039	2.8336	2.91094	2.87412	2.9037	2.84932	2.93367	2.8816	2.91315	3.03186	3.04153	2.96736	2.93342	2.95118	2.98136	3.33129	3.39625	3.40805	3.35344	3.36111	3.42133	2.89231	2.90072	3.74328	3.70024	2.86597	2.84831	2.87572	2.90947	3.01358	2.95532	3.37853	3.37863
ENSMUSG00000001082	Mfsd10	4.34321	4.36706	4.59877	4.48849	4.56105	4.49122	5.82131	5.91285	5.65487	5.80819	5.81402	5.78246	5.58487	5.885	5.69749	5.80042	5.6928	5.63199	4.88379	4.89824	4.77022	4.82876	4.89926	4.82275	5.29532	5.44069	5.57239	5.26608	5.40498	5.32676	4.87131	5.19062	4.8719	4.98515	5.0102	4.9486	4.43635	4.51359	5.79634	5.80156	5.72245	5.70841	4.85075	4.85026	5.43613	5.33261	4.97795	4.98132
ENSMUSG00000001089	Luzp1	9.51803	9.61309	9.91665	9.69918	9.6781	9.48697	10.5924	10.5524	10.5402	10.6147	10.5236	10.4965	10.1412	9.87367	9.79284	9.77497	9.92134	9.87154	10.4372	10.5071	10.4022	10.5214	10.4605	10.3927	10.8643	10.7646	10.6524	10.6595	10.6782	10.6191	10.3972	10.3517	10.3506	10.1732	10.1142	10.1149	9.68259	9.62142	10.5617	10.5449	9.93591	9.85595	10.4489	10.4582	10.7604	10.6523	10.3665	10.1341
ENSMUSG00000001098	Kctd10	6.96704	6.7253	6.68974	6.64388	6.53095	6.58808	7.01373	6.83436	7.093	6.92697	6.96005	6.96706	6.67567	6.48944	6.5792	6.59107	6.59693	6.66301	6.94839	6.97774	7.0817	6.93471	6.84942	7.0786	7.13863	6.90949	6.88396	7.02194	6.98428	6.95466	6.79126	6.6717	6.78174	6.77793	6.88027	6.83664	6.79403	6.58764	6.98037	6.95136	6.58144	6.617	7.00261	6.95424	6.97736	6.98696	6.74823	6.83161
ENSMUSG00000001100	Poldip2	7.07234	7.16426	7.01253	7.10554	7.19583	7.19667	7.89101	7.91583	7.96396	7.89462	7.97948	7.95765	7.48539	7.38692	7.50069	7.41383	7.43154	7.33863	7.65702	7.59775	7.72184	7.55941	7.50708	7.6169	7.86018	7.76104	7.67744	7.81218	7.78223	7.9287	7.32111	7.27397	7.39055	7.32572	7.38772	7.50057	7.08304	7.16601	7.9236	7.94392	7.45767	7.39467	7.65887	7.56113	7.76622	7.84104	7.32854	7.40467
ENSMUSG00000001103	Sebox	2.68233	2.69381	2.80546	2.71631	2.7119	2.73142	3.46102	3.46523	3.4402	3.46778	3.41926	3.40063	2.72076	2.58176	2.57625	2.45921	2.70467	2.70242	2.77053	2.76237	2.71999	2.76901	2.73351	2.70181	2.30518	2.31798	2.39875	2.39783	2.4148	2.45808	2.41997	2.37138	2.34539	2.40435	2.43938	2.4131	2.7272	2.71987	3.45548	3.42922	2.62625	2.6221	2.75096	2.73477	2.34064	2.42357	2.37891	2.41894
ENSMUSG00000001105	Ift20	6.23856	6.53833	6.57027	6.77091	6.74398	6.59355	7.47766	7.70705	7.50812	7.56102	7.63672	7.63469	7.39555	7.28441	7.50746	7.50091	7.42483	7.52177	7.27407	7.30758	7.11566	7.23476	7.40363	7.21596	7.45215	7.64183	7.58532	7.48497	7.52313	7.74199	6.76524	6.90997	6.8638	6.77882	6.73403	6.47155	6.44905	6.70281	7.56427	7.61081	7.3958	7.4825	7.23244	7.28479	7.55977	7.58336	6.84634	6.66147
ENSMUSG00000001119	Col6a1	2.40232	2.47607	2.46018	2.48237	2.47901	2.49467	3.18718	3.21739	3.12493	3.11042	3.18938	3.1163	3.72555	3.91923	3.7271	3.8582	3.81909	3.77713	2.79057	2.82419	2.83404	2.90559	2.79437	2.7456	3.17287	3.19115	3.23971	3.25319	3.25491	3.30738	2.25551	2.23337	2.27038	2.25349	2.23791	2.27463	2.44619	2.48535	3.1765	3.1387	3.79063	3.81814	2.81627	2.81519	3.20124	3.27183	2.25308	2.25534
ENSMUSG00000001120	Pcbp3	7.2407	7.19625	7.11854	7.25048	7.25165	7.16649	7.90537	7.66983	7.82458	7.88411	7.90708	7.85893	7.42292	7.46693	7.44761	7.37813	7.49656	7.31039	7.73771	7.65025	7.69208	7.5834	7.57934	7.75887	7.73906	7.59251	7.66993	7.59191	7.4937	7.60751	7.6274	7.53671	7.74877	7.64902	7.75154	7.83314	7.18516	7.22287	7.79992	7.88337	7.44582	7.39503	7.69335	7.64053	7.66717	7.56438	7.63763	7.74457
ENSMUSG00000001123	Lgals9	NA	NA	NA	NA	NA	NA	NA	NA	NA	NA	NA	NA	NA	NA	NA	NA	NA	NA	NA	NA	NA	NA	NA	NA	NA	NA	NA	NA	NA	NA	2.17181	2.10633	2.13641	2.18269	2.14083	2.17702	NA	NA	NA	NA	NA	NA	NA	NA	NA	NA	2.13818	2.16685
ENSMUSG00000001127	Araf	9.12753	8.9705	8.87057	8.81927	8.93806	8.93752	9.74344	9.59003	9.71588	9.68589	9.68572	9.6397	9.38979	9.26517	9.37438	9.3265	9.32513	9.35451	9.56739	9.63529	9.53324	9.56705	9.55333	9.51249	9.85738	9.76067	9.77849	9.78211	9.78043	9.83068	9.13545	9.17437	9.29691	9.32369	9.38305	9.26497	8.98953	8.89829	9.68312	9.67044	9.34311	9.33538	9.57864	9.54429	9.79885	9.79774	9.20224	9.3239
ENSMUSG00000001134	Uxt	1.95042	1.95858	2.01529	1.98967	2.02636	2.04258	3.09826	3.12937	3.13082	3.10359	3.11377	3.10211	2.1854	2.02728	2.0862	2.22507	2.07598	2.22661	2.09742	2.08392	2.1397	2.11832	2.12672	2.11907	2.89387	2.86502	2.79927	2.81485	2.83249	2.80486	2.71911	2.67483	2.60362	2.67702	2.64767	2.7211	1.97476	2.01953	3.11949	3.10649	2.09963	2.17589	2.10701	2.12137	2.85272	2.8174	2.66585	2.68193
ENSMUSG00000001138	Cnnm3	6.24567	6.01821	6.26871	6.18398	6.21666	6.15748	6.9865	7.1565	6.91922	7.01522	7.09648	7.07043	6.63292	6.9182	6.87142	6.86297	6.84375	6.82039	6.70382	6.72548	6.76068	6.68316	6.71506	6.75918	6.40097	6.6982	6.94659	6.67418	6.79148	6.64027	6.24741	6.2854	6.35493	6.23179	6.38253	6.31601	6.17753	6.18604	7.02074	7.06071	6.80752	6.84237	6.72999	6.71913	6.68192	6.70198	6.29591	6.31011
ENSMUSG00000001143	Lman2l	7.34594	7.10564	7.18429	7.15061	7.23662	7.24861	7.91634	8.08511	7.95768	7.87187	7.96362	8.03046	7.81821	8.53503	8.43097	8.42539	8.31917	8.39068	7.57375	7.73027	7.68133	7.5685	7.6012	7.5167	8.03039	8.23227	8.27196	8.06646	8.01033	8.04624	6.78761	7.05503	6.90726	6.82839	6.72386	6.69106	7.21196	7.21195	7.98637	7.95532	8.2614	8.37841	7.66178	7.56213	8.17821	8.04101	6.91663	6.74777
ENSMUSG00000001150	Mcm3ap	6.37508	6.21851	6.07069	6.25543	6.16289	6.18042	6.75564	6.83382	6.91215	6.79201	6.93745	6.87556	6.42571	6.40542	6.25366	6.25676	6.39304	6.29373	6.50659	6.39722	6.66224	6.56005	6.45987	6.43805	6.70012	6.52218	6.50342	6.61161	6.59043	6.62427	6.99002	6.99455	6.76491	6.88953	6.96915	7.04322	6.22143	6.19958	6.83387	6.86834	6.3616	6.31451	6.52202	6.48599	6.57524	6.60877	6.91649	6.9673
ENSMUSG00000001151	Pcnt	6.67581	6.41168	6.51565	6.5337	6.45972	6.40332	7.37826	7.31053	7.46576	7.40857	7.37273	7.27126	6.76197	6.59566	6.565	6.51904	6.68557	6.69207	7.01195	7.02374	7.16841	7.11107	7.00327	7.05205	7.1943	7.2818	7.16444	7.2356	7.27701	7.21637	7.03234	6.97197	6.89358	7.07819	7.12695	7.01364	6.53438	6.46558	7.38485	7.35085	6.64088	6.63223	7.06803	7.05546	7.21352	7.24299	6.96597	7.07293
ENSMUSG00000001156	Mxd1	5.65603	5.58688	5.46086	5.58259	5.58575	5.59019	6.57932	6.52051	6.68225	6.46602	6.43175	6.59768	5.93393	5.86606	5.92293	5.72308	6.02595	6.11853	6.17678	6.15702	6.17748	6.23672	6.20129	6.01037	6.72652	6.75254	6.66115	6.70945	6.81068	6.75174	5.99956	5.88554	5.99625	5.92504	6.06269	6.04621	5.56792	5.58618	6.59403	6.49848	5.90764	5.95585	6.17043	6.14946	6.7134	6.75729	5.96045	6.01131
ENSMUSG00000001157	Gmcl1	5.18243	5.39601	5.37143	5.49254	5.60255	5.49123	6.63517	6.83916	6.71952	6.78579	6.86852	6.70055	6.4429	6.58308	6.3665	6.59643	6.56208	6.58551	6.26825	6.31062	6.21803	6.28247	6.24439	6.18827	6.5023	6.74075	6.69198	6.57367	6.68771	6.59231	5.74895	5.69884	5.72159	5.82655	5.65486	5.79321	5.31662	5.52878	6.73128	6.78495	6.46416	6.58134	6.26563	6.23838	6.64501	6.6179	5.72313	5.75821
ENSMUSG00000001158	Snrnp27	7.03922	7.04766	7.25817	7.09727	7.01304	6.94043	7.86863	7.8287	7.86416	7.90708	7.78811	7.90633	7.61739	7.47791	7.55705	7.40552	7.41967	7.41588	7.88717	7.86109	7.89299	7.93792	7.8288	7.78056	8.00337	8.10126	7.96921	8.07441	8.11739	8.12754	7.42067	7.35591	7.47207	7.22477	7.26541	7.36115	7.11502	7.01691	7.85383	7.86717	7.55078	7.41369	7.88042	7.84909	8.02462	8.10645	7.41622	7.28378
ENSMUSG00000001166	Oas1c	NA	NA	NA	NA	NA	NA	NA	NA	NA	NA	NA	NA	NA	NA	NA	NA	NA	NA	NA	NA	NA	NA	NA	NA	1.83543	1.77721	1.8493	1.84853	1.79753	1.78496	NA	NA	NA	NA	NA	NA	NA	NA	NA	NA	NA	NA	NA	NA	1.82064	1.81034	NA	NA
ENSMUSG00000001173	Ocrl	7.41839	7.54273	7.35675	7.62318	7.55353	7.57952	8.4873	8.53548	8.47982	8.64129	8.60585	8.5379	8.06747	7.90633	7.92908	8.00417	7.99197	7.87435	8.35662	8.3844	8.42989	8.44202	8.3882	8.5747	8.51031	8.44767	8.37063	8.48665	8.61089	8.42507	7.93259	8.10577	8.14466	8.07094	7.95147	8.06582	7.43929	7.58541	8.50086	8.59501	7.96762	7.95683	8.3903	8.46831	8.44287	8.50753	8.061	8.02941
ENSMUSG00000001175	Calm1	13.7382	13.9782	14.2123	13.9197	13.7902	13.8295	14.8034	14.8233	14.788	14.844	14.7334	14.8132	14.4929	14.3447	14.3639	14.3141	14.3501	14.3725	14.7751	14.8285	14.6331	14.7978	14.7811	14.7027	14.8933	15.0523	14.9879	15.0294	15.1452	15.0713	14.3944	14.3524	14.3547	14.4112	14.238	14.1674	13.9762	13.8465	14.8049	14.7969	14.4005	14.3455	14.7456	14.7605	14.9778	15.082	14.3672	14.2722
ENSMUSG00000001211	Agpat3	8.24193	8.11545	8.01044	7.94931	8.00175	7.97742	8.93057	9.08704	9.04478	8.92283	9.01201	9.10544	8.76691	9.34145	9.08523	9.12119	8.98635	8.87883	8.5298	8.44832	8.45503	8.5086	8.28615	8.42185	8.73602	8.7519	8.93677	8.70776	8.82436	8.65092	8.01942	8.01744	8.00115	7.89009	8.0451	8.1727	8.12261	7.97616	9.0208	9.01343	9.06453	8.99546	8.47772	8.40554	8.80823	8.72768	8.01267	8.03596
ENSMUSG00000001227	Sema6b	7.29966	7.15408	7.22796	7.02116	7.09521	7.09269	7.97777	8.11829	8.03512	7.98958	8.00168	8.10544	7.98826	8.70293	8.52261	8.3731	8.28108	8.39556	7.94268	7.97362	7.90019	7.87515	7.86264	7.8155	8.26125	8.53207	8.59207	8.25733	8.1782	8.36904	7.48315	7.66564	7.45324	7.4928	7.49938	7.54205	7.22723	7.06969	8.04373	8.03223	8.4046	8.34991	7.93883	7.85109	8.4618	8.26819	7.53401	7.51141
ENSMUSG00000001229	Dpp9	7.041	6.99422	6.79663	6.93158	6.99272	7.04798	7.51712	7.38323	7.48472	7.53594	7.51139	7.46947	7.12774	7.00321	7.10694	6.97489	7.08126	7.00398	7.42373	7.29771	7.48605	7.33499	7.25807	7.40104	7.65506	7.30708	7.26197	7.36754	7.34858	7.25123	7.52272	7.40326	7.27373	7.40009	7.39292	7.50194	6.94395	6.99076	7.46169	7.5056	7.07929	7.02004	7.4025	7.33137	7.40804	7.32245	7.3999	7.43165
ENSMUSG00000001240	Ramp2	2.69972	2.68172	2.56509	2.62953	2.67219	2.75728	3.77857	3.71499	3.84469	3.76588	3.79252	3.72125	3.29049	3.2006	3.03874	3.20925	3.08409	3.2156	3.7299	3.70383	3.70653	3.73019	3.71219	3.74284	3.94206	3.9862	3.9383	3.88066	3.93863	3.89965	3.36977	3.28572	3.36269	3.40264	3.44338	3.40671	2.64884	2.68634	3.77942	3.75988	3.17661	3.16964	3.71342	3.72841	3.95552	3.90632	3.33939	3.41758
ENSMUSG00000001248	Gramd1a	7.15861	6.64979	6.7819	6.7968	6.7214	6.8178	7.4947	7.50273	7.47663	7.50566	7.58519	7.51563	7.17505	7.02077	7.03892	7.05096	7.10842	7.15808	7.14958	7.20221	7.24294	7.17157	7.09058	7.15704	7.25443	7.21325	7.1938	7.21607	7.24246	7.1616	6.95837	7.03375	6.98781	6.99428	7.02633	7.07707	6.86343	6.77867	7.49135	7.53549	7.07825	7.10582	7.19824	7.13973	7.22049	7.20671	6.99331	7.03256
ENSMUSG00000001260	Gabrg1	5.6682	5.6539	5.84509	5.97206	5.82279	5.76179	6.86093	6.88388	6.85084	6.88542	6.95319	6.92497	6.86452	7.22209	7.04674	6.68964	7.01902	6.98386	6.80254	6.71645	6.61346	6.78617	6.75972	6.74518	6.84908	6.9466	6.98143	6.64295	6.92072	6.70586	6.05986	5.96769	5.97365	6.15991	6.17708	5.92692	5.7224	5.85221	6.86522	6.92119	7.04445	6.89751	6.71082	6.76369	6.92571	6.75651	6.0004	6.08797
ENSMUSG00000001270	Ckb	12.2674	12.016	11.5675	11.5154	11.6528	11.6741	12.1997	11.8649	12.2162	12.1399	12.0184	12.0894	11.7083	11.9683	12.0248	12.0753	11.8099	11.792	11.9786	11.9039	12.352	11.946	11.9793	12.1205	12.141	11.933	11.9423	12.0133	11.9415	12.0125	12.3492	12.1152	12.1623	12.0614	12.5069	12.4386	11.9503	11.6141	12.0936	12.0826	11.9005	11.8924	12.0781	12.0152	12.0055	11.9891	12.2089	12.3356
ENSMUSG00000001280	Sp1	5.51473	5.66305	5.72169	5.54843	5.66791	5.7624	6.42713	6.46426	6.47881	6.43793	6.40573	6.33643	6.19862	6.38808	6.48087	6.30067	6.48098	6.2448	6.24935	6.32335	6.19626	6.31165	6.29675	6.11279	6.76259	7.04418	7.05789	6.9928	6.76094	6.95216	6.35998	6.4225	6.29805	6.36222	6.23803	6.31904	5.63315	5.65958	6.45673	6.39336	6.35585	6.34215	6.25632	6.2404	6.95489	6.90197	6.36018	6.30643
ENSMUSG00000001281	Itgb7	3.3549	3.32732	3.41744	3.29087	3.35197	3.46374	4.13713	4.15192	4.15942	4.18922	4.11502	4.09144	3.54418	3.84879	3.64834	3.62	3.71415	3.66923	3.76775	3.78292	3.78781	3.7965	3.74284	3.88198	4.49227	4.84684	4.47991	4.49002	4.50558	4.4064	3.94729	4.00371	3.89665	3.82074	3.86433	3.97739	3.36655	3.36886	4.14949	4.13189	3.68043	3.66779	3.77949	3.80711	4.60634	4.46733	3.94921	3.88749
ENSMUSG00000001285	Myg1	6.56905	6.27283	6.29515	6.37524	6.30229	6.30581	6.8875	6.7658	6.84741	6.81462	6.83379	6.91968	6.34296	6.32254	6.36627	6.46239	6.47086	6.49465	6.50881	6.43763	6.65219	6.41088	6.54058	6.5863	6.74383	6.69957	6.70893	6.69317	6.66734	6.72744	6.59833	6.31203	6.4666	6.52813	6.65382	6.53739	6.37901	6.32778	6.83357	6.85603	6.34392	6.47597	6.53288	6.51259	6.71744	6.69598	6.45899	6.57312
ENSMUSG00000001288	Rarg	1.92033	2.00794	1.98593	2.00856	1.97731	1.89791	2.69094	2.68509	2.71639	2.69048	2.70992	2.7233	2.12628	2.13403	1.96953	2.04246	2.0001	2.05492	1.93435	1.92138	1.8896	1.87917	1.88733	1.91483	2.3652	2.32705	2.45189	2.35384	2.37152	2.35061	1.66225	1.69522	1.70518	1.64745	1.65939	1.6255	1.9714	1.96126	2.69747	2.7079	2.07661	2.03249	1.91511	1.89377	2.38138	2.35866	1.68755	1.64411
ENSMUSG00000001289	Pfdn5	7.33177	7.39567	7.40425	7.47213	7.43915	7.33934	8.07647	7.99828	8.0241	8.04645	8.00578	7.95746	7.78814	7.74181	7.69929	7.83263	7.69205	7.5793	7.90478	7.90532	8.00155	7.89932	7.97942	7.95022	8.28898	8.15965	8.0861	8.06486	8.15419	8.19098	7.80049	7.8545	7.77163	7.6922	7.73851	7.69824	7.37723	7.41687	8.03295	8.00323	7.74308	7.70133	7.93722	7.94298	8.17825	8.13668	7.80888	7.70965
ENSMUSG00000001300	Efnb2	6.06782	6.12808	6.32027	5.97739	6.17612	6.09902	7.26952	7.32999	7.20272	7.3018	7.20733	7.23101	7.35531	7.80602	7.61601	7.49495	7.46715	7.61205	6.89921	7.0131	6.72705	6.89383	6.89217	6.75849	7.17821	7.48107	7.632	7.26508	7.32277	7.32029	6.66024	6.51062	6.58181	6.50229	6.56898	6.55936	6.17206	6.08418	7.26741	7.24671	7.59245	7.52472	6.87979	6.84816	7.43043	7.30271	6.58422	6.54355
ENSMUSG00000001305	Rrp15	3.97312	4.21492	4.25318	4.04379	4.10156	4.17113	4.74653	4.75051	4.7467	4.75609	4.74536	4.82174	4.46496	4.35065	4.42603	4.44617	4.32278	4.23444	4.62194	4.55009	4.55885	4.61452	4.53676	4.52037	4.72775	4.85779	4.73392	4.88792	4.90212	4.9789	4.03882	4.05926	4.07175	4.04399	4.00282	3.92798	4.14707	4.1055	4.74791	4.7744	4.41388	4.33446	4.57696	4.55721	4.77315	4.92298	4.05661	3.99159
ENSMUSG00000001313	Rnd2	5.15943	5.42204	5.35053	5.4617	5.54653	5.41938	6.29661	6.29315	6.38827	6.18592	6.3855	6.38962	5.959	5.8137	6.10534	5.83176	5.88926	5.88315	5.82532	5.80591	6.0725	5.95427	5.83286	5.90226	6.4101	5.95777	5.86874	5.85632	5.84444	6.01465	5.87864	5.75114	5.75831	5.52611	5.81673	5.78234	5.31067	5.47587	6.32601	6.32035	5.95935	5.86806	5.90125	5.89646	6.07887	5.90514	5.79603	5.70839
ENSMUSG00000001323	Srr	6.25591	6.4427	6.53767	6.39804	6.39667	6.60967	7.47202	7.6028	7.50803	7.35211	7.52142	7.5511	6.97175	7.08498	7.10009	7.12988	7.00592	7.22408	7.17298	7.13598	7.1155	7.13844	7.29005	7.16194	7.45224	7.50255	7.46502	7.4763	7.47294	7.51296	6.66727	6.57516	6.59487	6.6322	6.56421	6.59166	6.41209	6.46812	7.52762	7.47488	7.05228	7.11996	7.14148	7.19681	7.47327	7.4874	6.61243	6.59602
ENSMUSG00000001334	Fndc5	8.20587	7.98954	7.86365	7.96208	8.13544	8.07218	8.77152	9.01296	8.91242	8.86202	8.81762	8.85264	8.64604	9.04964	8.86741	8.99008	8.8177	8.79449	8.5182	8.36376	8.50526	8.61776	8.31391	8.28067	8.86446	8.92726	9.00965	8.90499	8.69324	8.84836	7.82024	8.07552	8.0018	7.64728	7.71754	7.88926	8.01969	8.05657	8.89897	8.84409	8.85436	8.86742	8.46241	8.40412	8.93379	8.81553	7.96585	7.75136
ENSMUSG00000001366	Fbxo9	7.0404	7.01614	6.88737	6.90253	6.8858	6.9158	7.84372	7.77055	7.6991	7.77563	7.77843	7.7492	7.20902	7.05001	7.20221	7.0633	7.07518	7.19174	7.57518	7.50023	7.63927	7.62097	7.56316	7.50849	7.63924	7.66915	7.66322	7.64459	7.70691	7.73215	7.4888	7.51307	7.29672	7.52751	7.41612	7.62654	6.9813	6.90138	7.77113	7.76775	7.15375	7.11008	7.57156	7.5642	7.6572	7.69455	7.43287	7.52339
ENSMUSG00000001376	Vps50	8.03761	8.1768	8.396	8.29437	8.2873	8.21876	9.109	8.94388	9.1685	9.09226	9.06752	9.0049	8.54563	8.12292	8.15099	8.25923	8.43321	8.2762	8.92358	8.76727	8.95105	8.90741	8.90646	9.06999	9.0455	8.88067	8.74669	9.0384	9.05543	8.86623	8.56989	8.47163	8.68099	8.83847	8.73303	8.72473	8.20347	8.26681	9.07379	9.05489	8.27318	8.32288	8.88063	8.96129	8.89095	8.98669	8.57417	8.76541
ENSMUSG00000001380	Hars	8.10438	8.11899	8.18959	8.09588	8.05497	8.06835	8.63662	8.59911	8.80475	8.70384	8.65571	8.71981	8.28583	8.29131	8.26026	8.30515	8.20623	8.0707	8.55246	8.56855	8.86929	8.69179	8.59513	8.6534	8.99485	8.67004	8.53209	8.71019	8.76928	8.74746	8.4869	8.40781	8.4939	8.43412	8.52238	8.50491	8.13765	8.07307	8.68016	8.69312	8.27913	8.19403	8.66343	8.64678	8.73233	8.74231	8.46287	8.48713
ENSMUSG00000001383	Zmat2	8.68106	8.49635	8.77595	8.65539	8.58421	8.64927	9.43002	9.48514	9.5316	9.47317	9.44742	9.42602	9.07535	9.04249	8.88939	8.89508	9.00667	9.01919	9.20802	9.10959	9.22669	9.35526	9.21833	9.03716	9.47259	9.49926	9.37538	9.52073	9.32713	9.54673	8.96294	9.02405	8.94023	8.91764	8.82877	8.84198	8.65112	8.62962	9.48226	9.44887	9.00241	8.97364	9.18144	9.20359	9.44908	9.46486	8.97574	8.8628
ENSMUSG00000001415	Smg5	7.24554	7.18275	6.97178	7.07268	7.21959	7.15472	7.81043	7.8008	7.87951	7.72159	7.76035	7.83522	7.34391	7.2037	7.19647	7.32972	7.28795	7.41186	7.50164	7.56968	7.64904	7.46348	7.49448	7.71725	7.46921	7.29756	7.23484	7.41521	7.47001	7.32106	7.07753	6.91381	7.11661	7.01336	7.1061	7.33787	7.13336	7.149	7.83024	7.77238	7.24803	7.34317	7.57345	7.5584	7.33387	7.40209	7.03598	7.15244
ENSMUSG00000001416	Cct3	9.29683	9.52968	9.39655	9.37486	9.30906	9.27566	10.08	9.90265	10.0757	10.0188	10.029	10.0077	9.58982	9.4652	9.4965	9.54677	9.46385	9.50345	9.743	9.69337	9.87471	9.71599	9.73274	9.88558	9.89729	9.57395	9.60142	9.77631	9.83668	9.65079	9.80354	9.6682	9.73653	9.80913	9.91712	9.81333	9.40769	9.31986	10.0195	10.0185	9.51718	9.50469	9.77036	9.7781	9.69089	9.75459	9.73609	9.84653
ENSMUSG00000001418	Glmp	6.16395	6.38405	6.40699	6.31573	6.37499	6.35306	7.56648	7.60155	7.30575	7.5078	7.52249	7.51472	7.33219	7.99904	7.98321	7.90624	7.79674	7.8391	7.13146	7.1551	7.18991	7.10452	7.05674	6.9961	7.44236	7.70844	7.87146	7.57123	7.64334	7.71938	6.72585	6.78743	6.72553	6.75664	6.67912	6.72816	6.31833	6.34793	7.49126	7.515	7.77148	7.84736	7.15882	7.05246	7.67409	7.64465	6.74627	6.72131
ENSMUSG00000001419	Mef2d	8.65468	8.39599	8.1138	8.3034	8.42378	8.41442	9.07342	8.85297	9.01786	9.02911	9.04498	9.02655	8.48967	8.44995	8.59031	8.54069	8.60059	8.56594	8.65123	8.70276	8.8987	8.72034	8.59993	8.69345	8.80537	8.65386	8.69261	8.71557	8.78186	8.69505	8.59349	8.39992	8.5547	8.37268	8.8136	8.58037	8.38815	8.38053	8.98141	9.03355	8.50998	8.56907	8.7509	8.67124	8.71728	8.73083	8.51604	8.58888
ENSMUSG00000001420	Tmem79	NA	NA	NA	NA	NA	NA	2.01442	1.9944	2.00815	2.03494	1.97904	2.02023	NA	NA	NA	NA	NA	NA	2.14519	2.15111	2.15166	2.11013	2.16027	2.1343	NA	NA	NA	NA	NA	NA	NA	NA	NA	NA	NA	NA	NA	NA	2.00566	2.0114	NA	NA	2.14932	2.1349	NA	NA	NA	NA
ENSMUSG00000001424	Snd1	8.0778	7.84863	7.79006	7.72107	7.62624	7.57246	8.53305	8.17846	8.47056	8.38185	8.2681	8.32322	7.81922	7.61422	7.7426	7.6452	7.61641	7.59113	8.20951	8.11466	8.41049	8.18378	8.22207	8.38818	8.51023	8.12754	8.11388	8.32007	8.26513	8.13563	8.4677	8.33356	8.37881	8.4193	8.63045	8.50851	7.9055	7.63992	8.39402	8.32439	7.72534	7.61758	8.24488	8.26468	8.25055	8.24028	8.39336	8.51942
ENSMUSG00000001435	Col18a1	9.86846	9.9748	9.74809	9.61114	9.77007	9.92378	10.9561	11.2184	10.8709	10.9432	10.9654	11.0798	10.8704	11.8981	11.5487	11.7876	11.4207	11.4509	10.4458	10.7822	10.5851	10.6472	10.5753	10.4014	10.698	11.4644	11.6971	11.0899	11.2872	11.457	10.0578	10.7074	10.0635	9.81852	9.82556	9.82542	9.86378	9.76833	11.0151	10.9961	11.4391	11.5531	10.6044	10.5413	11.2865	11.278	10.2762	9.82317
ENSMUSG00000001436	Slc19a1	4.8442	4.96554	4.94849	5.15793	5.01018	5.06799	6.06846	6.21954	6.03374	6.0348	6.19139	6.04522	6.03356	6.59485	6.25945	6.22964	6.37555	6.17979	5.67578	5.71943	5.63323	5.62554	5.66556	5.59804	5.87754	6.21852	6.21857	5.92518	5.95354	6.01711	5.23202	5.17822	5.25549	5.2393	5.26885	5.1914	4.91941	5.0787	6.10725	6.09047	6.29595	6.26166	5.67615	5.62971	6.10488	5.96528	5.22191	5.23318
ENSMUSG00000001440	Kpnb1	9.19296	9.21376	9.1526	9.25141	9.20879	9.17507	9.74583	9.54826	9.92645	9.74951	9.72849	9.79842	9.3486	9.32292	9.36164	9.3748	9.37519	9.32014	9.46818	9.39658	9.57564	9.50042	9.48109	9.60421	9.65407	9.38789	9.38392	9.51438	9.5378	9.46704	9.46304	9.41246	9.48925	9.52241	9.57757	9.65395	9.18644	9.21176	9.74018	9.75881	9.34439	9.35671	9.48013	9.52857	9.47529	9.50641	9.45492	9.58464
ENSMUSG00000001441	Npepps	9.27108	9.49147	9.51938	9.51713	9.37886	9.37639	10.3001	10.1648	10.2877	10.2959	10.2524	10.2447	9.85377	9.64287	9.63103	9.68133	9.70254	9.75138	10.0666	10.0206	10.1245	10.0104	10.0946	10.1956	10.2655	10.0569	10.0093	10.2326	10.2422	10.1322	9.74441	9.75877	9.8729	9.98001	9.74053	9.96851	9.42731	9.42413	10.2509	10.2643	9.70922	9.71175	10.0706	10.1002	10.1106	10.2023	9.79202	9.89635
ENSMUSG00000001445	Mrpl10	6.42154	6.60813	6.47324	6.60459	6.7918	6.5276	7.22419	7.13306	7.20436	7.22477	7.17803	7.12385	6.81099	6.69673	6.80672	6.71461	6.68404	6.76058	7.18811	6.99418	7.02868	6.98068	7.04087	7.17991	7.12514	7.33421	7.3049	7.284	7.20049	7.2362	6.76049	6.86795	6.79107	6.93851	6.76313	6.82307	6.50097	6.64133	7.1872	7.17555	6.77148	6.71974	7.07032	7.06715	7.25475	7.24023	6.8065	6.84157
ENSMUSG00000001467	Cyp51	7.99282	8.27117	8.46505	8.42237	8.29688	8.25839	9.36148	9.5708	9.23986	9.38453	9.42036	9.31465	9.34628	9.78818	9.51262	9.6185	9.63794	9.4855	8.95755	8.92063	8.57995	8.93882	8.85767	8.86952	9.08914	9.21348	9.43598	8.98834	9.13258	8.96407	8.50273	8.42745	8.46547	8.48608	8.38909	8.4835	8.24301	8.32588	9.39072	9.37318	9.54903	9.58065	8.81938	8.88867	9.2462	9.02833	8.46522	8.45289
ENSMUSG00000001472	Tcf25	10.0214	9.92107	9.71648	9.82566	9.91703	9.93231	10.681	10.7401	10.7962	10.7165	10.7582	10.7498	10.354	10.3033	10.3385	10.3316	10.3174	10.279	10.5162	10.386	10.5729	10.523	10.3242	10.4329	10.7654	10.5165	10.5032	10.5775	10.6067	10.5736	10.3071	10.2272	10.1675	10.2065	10.3731	10.3121	9.88634	9.89167	10.7391	10.7415	10.3319	10.3093	10.4917	10.4267	10.595	10.5859	10.2339	10.2972
ENSMUSG00000001482	Def8	6.62143	6.56558	6.01761	6.60513	6.79633	6.82463	7.38824	7.39226	7.52836	7.41805	7.46896	7.51539	7.02119	7.07755	7.19936	7.0729	7.01095	7.19196	6.86902	6.91659	7.16121	7.00775	6.97821	6.9498	7.15812	7.06243	7.15074	7.03881	7.00428	7.19899	6.5113	6.52231	6.57475	6.51882	6.69516	6.54221	6.40154	6.74203	7.43629	7.46747	7.09937	7.09194	6.98227	6.97859	7.12376	7.08069	6.53612	6.5854
ENSMUSG00000001496	Nkx2-1	NA	NA	NA	NA	NA	NA	2.21684	2.19775	2.23456	2.28239	2.22014	2.22004	NA	NA	NA	NA	NA	NA	NA	NA	NA	NA	NA	NA	1.99679	2.02267	1.91316	1.9841	1.89461	1.9339	NA	NA	NA	NA	NA	NA	NA	NA	2.21638	2.24086	NA	NA	NA	NA	1.97754	1.93754	NA	NA
ENSMUSG00000001504	Irx2	3.36754	3.34277	3.55081	3.60551	3.54643	3.54105	4.58885	4.64049	4.64964	4.54284	4.59911	4.6563	4.2648	4.54259	4.46284	4.17111	4.37614	4.11397	3.86011	3.78165	3.85797	3.84605	3.78414	3.81604	4.44532	4.40007	4.59941	4.22271	4.2392	4.2978	4.81627	4.813	4.73544	4.88576	4.91898	4.80244	3.42037	3.56433	4.62632	4.59941	4.42341	4.22041	3.83324	3.81541	4.4816	4.25324	4.78824	4.86906
ENSMUSG00000001506	Col1a1	3.87868	3.79524	3.78615	4.01214	3.94198	3.81776	4.11094	4.04818	4.06235	4.08446	4.09493	4.09086	3.84974	4.032	3.801	3.83214	3.89996	3.70925	3.5787	3.6499	3.53785	3.61216	3.69177	3.62451	3.35458	3.31609	3.28185	3.23366	3.16963	3.24443	2.87457	2.84029	2.83686	2.92352	2.94358	2.96057	3.82002	3.92396	4.07383	4.09009	3.89425	3.81378	3.58881	3.64281	3.3175	3.21591	2.85058	2.94256
ENSMUSG00000001507	Itga3	8.93071	8.67318	8.63971	8.58582	8.74794	8.85741	9.74103	9.99777	9.82746	9.78793	9.73988	9.82673	9.69432	10.6205	10.2624	10.2933	10.2168	10.0965	9.44707	9.57313	9.48105	9.59297	9.39254	9.2905	10.0509	10.3131	10.4458	10.0023	10.1275	10.2561	9.03729	9.47132	9.03383	9.08834	9.05643	9.05483	8.74787	8.73039	9.85542	9.78485	10.1924	10.2022	9.50042	9.42534	10.27	10.1286	9.18081	9.06653
ENSMUSG00000001508	Sgca	NA	NA	NA	NA	NA	NA	2.79741	2.76229	2.76919	2.79405	2.82136	2.75786	2.8739	3.06135	2.82913	2.8393	2.97107	2.82762	2.40472	2.45893	2.38889	2.38413	2.37236	2.39645	2.72311	2.63319	2.63163	2.64735	2.66502	2.60903	NA	NA	NA	NA	NA	NA	NA	NA	2.7763	2.79109	2.92146	2.87933	2.41751	2.38431	2.66264	2.64047	NA	NA
ENSMUSG00000001518	Itfg2	6.05356	5.73117	5.52601	5.66296	5.74158	5.81487	6.30176	6.21002	6.35371	6.29584	6.2796	6.31735	5.83291	5.85109	5.7867	5.72388	5.63064	5.65191	5.85599	5.80065	5.93729	5.83682	5.9513	5.83482	6.15426	5.95791	5.91537	5.91103	5.96909	5.94979	5.82989	5.71648	5.79051	5.68847	5.85606	5.79141	5.77025	5.73981	6.2885	6.2976	5.82357	5.66881	5.86464	5.87431	6.00918	5.9433	5.77896	5.77865
ENSMUSG00000001520	Nrip2	2.7179	2.818	2.796	2.79414	2.88974	2.76692	3.94481	3.84411	3.92702	3.91127	3.88124	3.86596	3.03842	3.08677	3.00438	3.01912	2.86448	3.07849	3.41991	3.38488	3.34268	3.34027	3.44699	3.42911	3.66595	3.79721	3.65263	3.68051	3.68248	3.78675	3.9667	4.04635	3.99148	3.96084	3.83491	3.92477	2.7773	2.81693	3.90531	3.88616	3.04319	2.98737	3.38249	3.40546	3.70526	3.71658	4.00151	3.90684
ENSMUSG00000001521	Tulp3	4.00329	4.16448	4.3523	4.23402	4.20549	4.22757	4.88187	5.00659	4.89127	4.94017	4.95771	4.97848	4.7543	4.72705	4.7377	4.77146	4.84518	4.63463	4.53863	4.48402	4.46323	4.51815	4.51759	4.41126	4.85014	5.03459	5.02704	4.89901	4.85762	4.94043	4.37063	4.4291	4.33549	4.38456	4.3436	4.22411	4.17336	4.22236	4.92658	4.95879	4.73968	4.75043	4.49529	4.48233	4.97059	4.89902	4.3784	4.31742
ENSMUSG00000001524	Gtf2h4	5.58536	5.60696	5.44681	5.62587	5.75833	5.62681	6.35993	6.25523	6.40468	6.30911	6.29281	6.29346	5.59074	5.26737	5.16505	5.22547	5.40716	5.48692	6.07826	6.01814	6.05313	5.95611	5.93188	6.08406	5.90577	5.89063	5.8208	5.94558	5.92916	5.85107	5.45628	5.28189	5.43757	5.3651	5.60645	5.38516	5.54638	5.67034	6.33995	6.29846	5.34105	5.37319	6.04984	5.99068	5.8724	5.9086	5.39191	5.45224
ENSMUSG00000001525	Tubb5	10.3786	10.3242	10.153	10.2077	10.211	10.255	10.8708	10.8215	10.9517	10.8784	10.9287	10.852	10.562	10.4724	10.4623	10.4588	10.5029	10.4088	10.622	10.5949	10.6953	10.6639	10.6004	10.6634	10.8439	10.7372	10.6949	10.7152	10.7671	10.6757	10.8228	10.7046	10.7498	10.6729	10.8373	10.8149	10.2853	10.2246	10.8813	10.8864	10.4989	10.4568	10.6374	10.6426	10.7586	10.7193	10.759	10.775
ENSMUSG00000001542	Ell2	6.49934	6.5063	6.54288	6.49916	6.45749	6.42296	7.44788	7.5014	7.47155	7.41485	7.43818	7.58235	7.00818	6.9651	7.0642	7.12185	7.07037	7.19125	7.22953	7.20179	7.09565	7.16087	7.24157	7.16523	7.44743	7.62717	7.62436	7.5605	7.61276	7.64408	7.03149	7.08761	6.9552	7.13269	7.08472	7.03314	6.51617	6.45987	7.47361	7.47846	7.01249	7.12782	7.17566	7.18923	7.56632	7.60578	7.02477	7.08351
ENSMUSG00000001552	Jup	8.88515	8.56557	8.36986	8.38278	8.44267	8.62326	9.13904	8.88818	9.11165	9.09516	9.03673	9.08404	8.42983	8.46834	8.53138	8.40165	8.61327	8.41738	8.64966	8.70594	8.96589	8.75515	8.69026	8.83522	8.54534	8.59775	8.60497	8.85057	8.76944	8.62371	8.84866	8.67816	8.87096	8.90399	9.18315	9.11302	8.60686	8.4829	9.04629	9.07198	8.47652	8.47743	8.77383	8.76021	8.58269	8.7479	8.79926	9.06672
ENSMUSG00000001555	Fkbp10	NA	NA	NA	NA	NA	NA	NA	NA	NA	NA	NA	NA	2.22609	2.17014	2.0733	2.1648	2.26143	2.09193	1.95026	2.00809	1.99202	1.96604	2.01023	2.03658	1.84578	1.89918	1.90083	1.81324	1.8317	1.81887	2.11181	2.11679	2.14203	2.0967	2.1854	2.14182	NA	NA	NA	NA	2.15651	2.17272	1.98346	2.00428	1.88193	1.82127	2.12354	2.1413
ENSMUSG00000001569	Nom1	6.01189	6.07191	6.15391	6.12716	6.00878	6.09186	6.80685	6.57188	6.79718	6.74176	6.74209	6.6486	6.25741	6.02639	5.9888	6.05248	6.03187	6.15522	6.59387	6.52701	6.66651	6.43267	6.54059	6.56624	6.41491	6.50517	6.10026	6.40378	6.46778	6.39525	6.31706	6.19283	6.18708	6.31315	6.44371	6.13296	6.07924	6.07593	6.7253	6.71081	6.09087	6.07985	6.59579	6.51317	6.34012	6.42227	6.23233	6.29661
ENSMUSG00000001576	Ergic1	9.37783	9.15911	9.3206	9.31008	9.40235	9.47857	10.16	10.3504	10.2792	10.1514	10.2457	10.3463	10.1053	10.7728	10.6748	10.6529	10.4874	10.4974	9.90278	9.92746	9.80327	9.81747	9.81897	9.75378	10.0993	10.4411	10.4712	10.2914	10.2896	10.451	9.27491	9.61049	9.38149	9.18618	9.25199	9.28181	9.28585	9.397	10.2632	10.2478	10.5176	10.5459	9.87784	9.79674	10.3372	10.344	9.4223	9.23999
ENSMUSG00000001627	Ifrd1	5.7312	5.56294	5.65082	5.7104	5.6729	5.75305	6.44458	6.32828	6.40341	6.42175	6.39389	6.41318	5.80933	5.69941	5.60175	5.86122	5.95415	6.21671	5.92805	5.94787	5.99141	5.95876	6.10917	6.08521	6.06719	6.17762	6.08564	6.08101	6.15429	5.99822	5.75679	5.577	5.69145	5.7891	5.86373	5.69602	5.64832	5.71212	6.39209	6.4096	5.70349	6.01069	5.95578	6.05105	6.11015	6.07784	5.67508	5.78295
ENSMUSG00000001630	Stk38l	4.9228	4.75917	4.65324	4.71573	4.82361	4.64784	5.4167	5.49515	5.55998	5.41664	5.4766	5.45485	5.08565	5.08938	5.02615	5.2803	5.01679	5.10629	5.37211	5.39803	5.41711	5.44169	5.38897	5.54957	5.71114	5.45283	5.42172	5.48286	5.55733	5.39991	4.99494	4.84321	4.97399	4.92639	5.05392	5.01046	4.7784	4.72906	5.49061	5.44937	5.06706	5.13446	5.39575	5.46008	5.52856	5.48003	4.93738	4.99692
ENSMUSG00000001632	Brpf1	5.79542	5.91976	5.88502	5.989	6.17249	6.01902	6.56263	6.54275	6.67694	6.59815	6.63776	6.57175	6.08269	6.00198	6.07085	6.014	6.06374	6.0258	6.20395	6.1332	6.22184	6.23779	6.20667	6.23818	6.32637	6.15012	6.18935	6.19124	6.22311	6.0913	6.14269	6.05034	6.17399	6.01196	6.16681	6.09207	5.86673	6.06017	6.59411	6.60255	6.05184	6.03451	6.18633	6.22755	6.22195	6.16855	6.12234	6.09028
ENSMUSG00000001642	Akr1b3	3.22429	3.40948	3.2484	3.28186	3.25387	3.16266	3.93759	3.82022	3.90579	3.93617	3.87377	3.90762	2.81226	2.74349	2.8179	2.89986	2.70991	2.86712	3.82284	3.72725	3.73819	3.70721	3.74927	3.78453	3.79993	3.95783	3.81946	3.85921	3.86159	3.73527	3.81012	3.77565	3.81844	3.88494	3.77523	3.83069	3.29406	3.2328	3.88787	3.90585	2.79122	2.82563	3.76276	3.747	3.85907	3.81869	3.8014	3.83029
ENSMUSG00000001661	Hoxc6	NA	NA	NA	NA	NA	NA	NA	NA	NA	NA	NA	NA	NA	NA	NA	NA	NA	NA	1.96718	2.02257	1.96849	2.065	1.97256	2.00874	2.86028	2.98547	3.07776	2.81087	2.87996	2.92685	NA	NA	NA	NA	NA	NA	NA	NA	NA	NA	NA	NA	1.98608	2.01543	2.9745	2.87256	NA	NA
ENSMUSG00000001663	Gstt1	3.92038	3.76099	3.78281	3.8033	3.76406	3.83875	4.41359	4.42747	4.42753	4.38507	4.49784	4.35628	3.71537	3.79477	3.55938	3.58026	3.55688	3.6725	3.81659	3.72965	3.80922	3.84926	3.81075	3.88276	3.59413	3.54185	3.62731	3.7348	3.66998	3.61045	3.78665	3.67218	3.69227	3.64074	3.70591	3.61013	3.82139	3.80204	4.42287	4.41306	3.68984	3.60321	3.78515	3.84759	3.58776	3.67175	3.71703	3.65226
ENSMUSG00000001666	Ddt	6.12773	6.21391	6.25785	6.21928	6.23562	6.43117	7.03935	6.97324	7.0048	6.84877	6.90916	6.94481	6.66438	6.48866	6.77565	6.53885	6.66111	6.79052	6.85814	7.00205	6.91167	6.79588	6.98666	6.99696	6.99814	6.83109	6.8347	6.84878	6.73738	6.89902	6.47878	6.27279	6.35979	6.39996	6.53561	6.44357	6.19983	6.29536	7.0058	6.90091	6.6429	6.6635	6.92395	6.9265	6.88798	6.82839	6.37045	6.45971
ENSMUSG00000001674	Ddx18	3.50068	3.58375	3.69335	3.61966	3.62891	3.57724	4.64424	4.54059	4.56576	4.64221	4.53791	4.52341	4.21313	4.29246	4.2741	4.21861	4.24092	4.05819	4.39251	4.31929	4.37105	4.32371	4.35889	4.37691	4.62389	4.67006	4.59715	4.67434	4.58564	4.49684	4.23711	4.29365	4.29131	4.29792	4.31018	4.26743	3.59259	3.60861	4.58353	4.56784	4.2599	4.17257	4.36095	4.35317	4.63037	4.58561	4.27403	4.29184
ENSMUSG00000001687	Ubl3	9.7408	9.75161	9.94303	9.80391	9.85537	9.79011	10.6492	10.7235	10.5815	10.6967	10.6485	10.6444	10.3956	10.5362	10.6219	10.588	10.5348	10.5625	10.5526	10.5253	10.4505	10.535	10.5794	10.4535	10.6738	10.918	10.9879	10.8846	10.8563	11.0257	10.0881	10.3816	10.2191	10.0949	9.9542	10.0953	9.81182	9.81646	10.6514	10.6632	10.5179	10.5618	10.5095	10.5226	10.8599	10.9222	10.2296	10.0481
ENSMUSG00000001700	Gramd3	NA	NA	NA	NA	NA	NA	NA	NA	NA	NA	NA	NA	NA	NA	NA	NA	NA	NA	1.31464	1.27368	1.26003	1.31446	1.2484	1.26751	2.09092	2.07325	2.02517	2.04232	2.09498	2.01143	NA	NA	NA	NA	NA	NA	NA	NA	NA	NA	NA	NA	1.28279	1.27679	2.06312	2.04958	NA	NA
ENSMUSG00000001707	Eef1e1	7.63105	7.54394	7.74619	7.58813	7.51803	7.60958	8.40202	8.29945	8.33364	8.44871	8.32608	8.34542	7.96959	7.93898	8.02432	7.81766	7.88488	8.0526	8.46306	8.45295	8.31458	8.34367	8.44745	8.36603	8.78689	8.70712	8.70798	8.70955	8.75609	8.79064	7.94396	7.78242	7.96453	8.06901	7.83153	7.95636	7.64039	7.57191	8.34504	8.3734	7.97763	7.91838	8.4102	8.38572	8.73399	8.7521	7.89697	7.9523
ENSMUSG00000001729	Akt1	7.42682	7.21556	6.97742	7.12212	7.24051	7.15095	7.81239	7.76109	7.94176	7.78708	7.8224	7.84659	7.43365	7.45505	7.57019	7.51222	7.38084	7.46071	7.6639	7.58722	7.66504	7.67123	7.50769	7.57432	7.78698	7.63668	7.73274	7.71465	7.62808	7.80801	7.4751	7.32867	7.36468	7.28358	7.23588	7.4188	7.2066	7.17119	7.83841	7.81869	7.4863	7.45126	7.63872	7.58441	7.7188	7.71691	7.38948	7.31276
ENSMUSG00000001741	Il16	8.12865	7.61709	7.9071	7.81079	7.82037	7.81099	8.29854	7.89299	7.99343	8.12914	7.85774	7.96453	7.78277	7.58437	7.72108	7.13991	7.64503	7.60205	7.79668	7.85046	8.02244	7.74215	7.88171	7.79334	7.72597	7.83188	7.8072	7.87374	7.55264	7.75557	7.57571	7.37492	7.65086	7.39232	7.64219	7.45786	7.88428	7.81405	8.06165	7.9838	7.69607	7.46233	7.88986	7.80574	7.78835	7.72732	7.53383	7.49746
ENSMUSG00000001750	Tcirg1	2.36765	2.29441	2.32937	2.38286	2.39988	2.36277	3.04622	3.09133	3.03242	3.0159	3.08621	3.01078	3.2037	3.32083	3.4048	3.32941	3.32875	3.31175	3.03515	3.08579	3.05675	3.11741	3.05533	3.02971	2.78525	2.69318	2.73594	2.63461	2.63552	2.67643	2.67763	2.60368	2.62653	2.6489	2.64555	2.66171	2.33048	2.38184	3.05666	3.03763	3.30978	3.3233	3.05923	3.06748	2.73812	2.64885	2.63595	2.65205
ENSMUSG00000001751	Naglu	4.31073	4.36983	4.56857	4.48597	4.46243	4.42619	5.60903	5.64707	5.53742	5.58767	5.63338	5.67622	5.30354	5.67961	5.439	5.46873	5.405	5.53264	4.97111	5.02837	4.87299	4.8978	4.87786	4.81474	5.06043	5.26106	5.31422	5.24653	5.1829	5.1597	4.01522	3.9959	3.99943	4.0328	4.2117	3.96894	4.41638	4.4582	5.59784	5.63242	5.47405	5.46879	4.95749	4.86346	5.2119	5.19637	4.00352	4.07115
ENSMUSG00000001755	Coasy	5.35452	5.347	5.25815	5.36212	5.39229	5.48993	6.22467	6.25833	6.25195	6.38546	6.14174	6.33078	5.60662	5.55702	5.5301	5.42053	5.57662	5.59669	5.99935	5.93684	6.03397	6.05462	5.99574	6.02619	6.24173	5.99485	6.00126	6.06197	6.10885	5.9725	5.85027	5.67184	5.80828	5.71285	5.68861	5.79324	5.31989	5.41478	6.24498	6.28599	5.56458	5.53128	5.99005	6.02551	6.07928	6.04777	5.7768	5.73156
ENSMUSG00000001761	Smo	5.09495	5.01386	5.0387	5.13222	5.04965	5.07588	6.08669	6.18428	6.04302	6.1188	6.13015	6.23193	5.76013	6.21937	5.76386	6.267	5.89486	6.15438	5.50454	5.61999	5.48189	5.51998	5.39779	5.51701	5.33564	5.5945	5.89106	5.65735	5.80858	5.52833	4.37283	4.38482	4.37953	4.39812	4.32441	4.40103	5.04917	5.08591	6.10466	6.16029	5.91445	6.10542	5.53547	5.47826	5.60707	5.66475	4.37906	4.37452
ENSMUSG00000001763	Tspan33	4.92159	5.05868	5.1139	5.21249	5.3223	5.38079	6.51242	6.62484	6.46909	6.54056	6.55623	6.43444	6.54414	7.11223	6.72378	6.79008	6.70065	6.86391	6.36586	6.31369	6.2962	6.36414	6.3417	6.31331	6.61885	6.9237	6.98604	6.84988	6.81225	6.81465	5.66814	5.82874	5.73805	5.76867	5.72079	5.73677	5.03139	5.30519	6.53545	6.51041	6.79339	6.78488	6.32525	6.33972	6.84286	6.8256	5.74498	5.74207
ENSMUSG00000001767	Crnkl1	6.17136	6.08477	6.08733	6.09027	6.02516	6.13919	7.04653	7.02129	7.01675	7.06321	6.97577	7.10036	6.64604	6.76908	6.6284	6.70228	6.77302	6.70382	6.69912	6.65811	6.81528	6.722	6.89736	6.96753	6.86032	6.87962	6.90376	6.9892	6.98705	6.96045	6.72267	6.83063	6.84842	6.86409	6.90882	6.92312	6.11449	6.08487	7.02819	7.04645	6.68117	6.72637	6.72417	6.86229	6.88123	6.9789	6.80057	6.89868
ENSMUSG00000001768	Rin2	3.81324	3.76872	3.74714	3.69493	3.79986	3.96868	4.68524	4.70993	4.79247	4.68104	4.62505	4.63569	4.44625	4.36777	4.24385	4.23415	4.24165	4.37712	4.41889	4.37358	4.40699	4.40908	4.42263	4.35122	4.73909	4.89103	4.76917	4.88635	4.89022	4.72995	4.34472	4.31667	4.41652	4.43667	4.36337	4.50737	3.77637	3.82116	4.72921	4.64726	4.35262	4.28431	4.39982	4.39431	4.79976	4.83551	4.3593	4.4358
ENSMUSG00000001773	Folh1	3.02006	3.09013	3.24074	3.20947	3.07093	3.08556	4.63466	4.71533	4.56148	4.64421	4.59736	4.5623	4.49095	4.58752	4.60462	4.54322	4.76091	4.63498	4.49151	4.45939	4.31822	4.40655	4.44463	4.37918	4.7656	4.97377	4.951	4.81957	4.78841	4.93907	4.06253	3.97404	3.97784	4.02242	4.00369	4.03221	3.11698	3.12199	4.63716	4.60129	4.56103	4.64637	4.42304	4.41012	4.89679	4.84902	4.0048	4.01944
ENSMUSG00000001774	Chordc1	8.47181	9.0408	9.31586	8.97985	8.70693	8.70451	9.62179	9.5911	9.61327	9.76265	9.57912	9.62351	9.47614	9.59848	9.63225	9.66021	9.59745	9.63033	9.7368	9.657	9.62943	9.64777	9.83374	9.78328	10.1114	9.98938	9.96204	9.93507	9.96608	10.0305	9.52044	9.6709	9.50583	9.47839	9.16263	9.36966	8.94282	8.7971	9.60872	9.6551	9.56896	9.62933	9.67441	9.75493	10.021	9.97722	9.56572	9.33689
ENSMUSG00000001783	Rtcb	8.20806	8.01425	7.80955	7.95001	7.8877	7.97152	8.78665	8.80834	8.9225	8.82921	8.96229	8.87625	8.1829	8.18921	8.22782	8.19251	8.24711	8.31867	8.5411	8.56651	8.66644	8.61616	8.54918	8.64857	8.91603	8.58124	8.5612	8.74646	8.69308	8.68559	8.68611	8.53597	8.57647	8.74447	8.68554	8.63239	8.01062	7.93641	8.83916	8.88925	8.19998	8.25277	8.59135	8.60464	8.68616	8.70837	8.59952	8.68747
ENSMUSG00000001785	Pwp1	5.33738	5.26317	5.35615	5.24299	5.18666	5.28872	5.87924	5.89543	6.04982	5.96815	6.02964	5.99288	5.52177	5.57319	5.74053	5.68231	5.71786	5.6622	5.98867	6.03079	5.93921	6.08996	5.92346	6.03545	6.19071	5.72393	5.95355	6.10409	6.08308	5.94571	5.59304	5.6787	5.51001	5.80998	5.72623	5.7266	5.3189	5.23945	5.9415	5.99689	5.61183	5.68746	5.98622	6.01629	5.95606	6.04429	5.59392	5.75427
ENSMUSG00000001786	Fbxo7	6.47356	6.58009	6.63906	6.41298	6.49074	6.43158	7.04535	7.06048	7.1531	7.12469	7.13009	7.22359	6.67068	6.71065	6.71964	6.88079	6.74939	6.72542	6.87135	7.00167	6.93866	6.87573	6.93948	6.83436	7.12612	6.95998	6.96027	7.18784	7.09918	7.01441	6.89975	6.77278	6.72647	6.75049	6.79577	6.73418	6.56424	6.4451	7.08631	7.15946	6.70032	6.7852	6.93723	6.88319	7.01546	7.10048	6.79967	6.76015
ENSMUSG00000001794	Capns1	9.39193	9.26204	9.03241	8.95987	8.98687	9.03273	9.57677	9.36393	9.70658	9.57774	9.44049	9.58411	8.9815	9.15725	9.05454	9.15387	8.99898	8.99975	9.39752	9.3496	9.6072	9.43645	9.29695	9.40998	9.64355	9.36836	9.38193	9.41716	9.3209	9.40473	9.1668	9.14883	9.06644	9.13537	9.24147	9.26233	9.22879	8.99316	9.54909	9.53411	9.06443	9.05087	9.45144	9.38113	9.46461	9.38093	9.12736	9.21305
ENSMUSG00000001802	Lrp3	5.99047	6.17782	6.02294	5.96247	6.24631	6.26147	7.08379	7.13455	7.00696	7.04784	7.03252	7.02702	6.97989	7.30278	7.22805	7.10808	7.18699	7.18305	6.76759	6.93001	6.78574	6.76921	6.72027	6.79963	7.25335	7.01969	7.34769	7.0422	6.97889	7.06064	6.50209	6.66348	6.41873	6.41577	6.4014	6.56079	6.06374	6.15675	7.0751	7.03579	7.17024	7.15937	6.82778	6.76304	7.20691	7.02725	6.5281	6.45932
ENSMUSG00000001827	Folr1	NA	NA	NA	NA	NA	NA	2.49262	2.50494	2.50418	2.48348	2.47499	2.50783	2.69271	2.70872	2.65589	2.63849	2.64223	2.68311	2.27627	2.31136	2.26921	2.2653	2.29044	2.25427	2.45547	2.48316	2.54779	2.48258	2.48359	2.49103	2.14219	2.14888	2.0678	2.12663	2.15086	2.17689	NA	NA	2.50058	2.48877	2.68578	2.65461	2.28561	2.27	2.49547	2.48574	2.11963	2.15146
ENSMUSG00000001829	Clpb	7.04842	6.64772	6.62542	6.62798	6.62138	6.72444	7.18935	7.23112	7.39773	7.08848	7.26666	7.30921	6.82874	7.03849	7.14255	7.17394	6.90634	7.12216	6.60616	6.76488	7.02634	6.93388	6.85933	6.98256	7.11354	6.88428	6.97405	7.0177	7.09635	6.9046	6.91967	6.89601	6.86087	6.84787	7.04104	6.97829	6.77385	6.65793	7.27273	7.22145	7.00326	7.06748	6.79913	6.92526	6.99062	7.00622	6.89218	6.95574
ENSMUSG00000001833	2007-09-01	10.4323	10.6964	10.8398	10.8005	10.6309	10.5988	11.5777	11.551	11.6138	11.66	11.6698	11.6831	11.1235	10.9425	10.825	11.0485	11.0359	11.011	11.4351	11.3742	11.4812	11.4164	11.5204	11.5559	11.4802	11.5136	11.472	11.6271	11.7238	11.6307	11.1381	11.0916	11.277	11.2573	11.0655	11.1136	10.6562	10.6767	11.5809	11.6709	10.9637	11.0318	11.4302	11.4976	11.4886	11.6605	11.1689	11.1454
ENSMUSG00000001844	Zdhhc4	4.20532	4.2125	4.31591	4.26897	4.32851	4.33987	5.21235	5.26245	5.14267	5.1828	5.26973	5.24726	5.05123	5.2756	5.22456	5.3309	5.22867	5.22496	4.64245	4.60179	4.54168	4.62605	4.57513	4.56184	4.90564	4.85719	5.17395	4.967	4.94922	5.04463	4.46898	4.58269	4.47481	4.50456	4.50507	4.41829	4.24458	4.31245	5.20582	5.23326	5.1838	5.26151	4.59531	4.58767	4.97893	4.98695	4.50882	4.47597
ENSMUSG00000001847	Rac1	8.94476	8.90526	8.66128	8.76871	8.74587	8.85987	9.51466	9.29058	9.42899	9.48893	9.43719	9.43138	8.97842	8.94755	8.96699	8.99103	8.91857	8.95479	9.39527	9.31385	9.41259	9.40366	9.36867	9.36312	9.3818	9.48991	9.3964	9.55196	9.51425	9.45581	9.18693	9.13809	9.19964	9.21806	9.25622	9.17375	8.8371	8.79148	9.41141	9.4525	8.96432	8.95479	9.3739	9.37848	9.42271	9.50734	9.17489	9.21601
ENSMUSG00000001855	Nup214	7.39281	7.10616	7.23636	7.18856	6.99815	7.06821	8.0468	7.91142	7.93651	7.96277	7.85633	7.88464	7.48356	7.2743	7.50522	7.1958	7.41082	7.33235	7.78827	7.82419	7.76694	7.75904	7.86339	7.66337	8.20479	8.12377	8.10181	8.15413	8.13852	8.1126	8.06222	8.05603	7.94558	7.90001	8.0217	7.99394	7.24511	7.08497	7.96491	7.90125	7.42103	7.31299	7.79313	7.76194	8.14346	8.13508	8.02128	7.97188
ENSMUSG00000001870	Ltbp1	2.10266	2.14627	2.08428	2.1245	2.24601	2.21811	3.40158	3.39296	3.37486	3.4188	3.41232	3.38666	3.61818	3.95162	3.86019	3.66493	3.62976	3.52647	2.89249	2.89519	2.87761	2.89961	2.92826	2.85533	3.53053	3.63969	3.72613	3.65626	3.63002	3.61289	2.90769	2.9712	2.93085	2.96823	2.92689	2.88597	2.11107	2.19621	3.3898	3.40592	3.81	3.60705	2.88843	2.8944	3.63212	3.63306	2.93658	2.92703
ENSMUSG00000001891	Ugp2	8.003	8.4363	8.63829	8.38559	8.18163	8.19402	9.17617	9.08106	9.10104	9.17937	9.17553	9.14469	8.91259	8.74797	8.80894	8.82726	8.77931	8.78326	9.05385	9.01517	8.96521	8.98422	9.01822	9.09654	9.2194	9.22768	9.14324	9.19307	9.30593	9.17948	8.80666	8.826	8.79066	8.98126	8.74434	8.90032	8.35919	8.25375	9.11942	9.16653	8.82317	8.79661	9.01141	9.03299	9.19677	9.22616	8.80778	8.87531
ENSMUSG00000001901	Kcnh6	NA	NA	NA	NA	NA	NA	2.81093	2.77388	2.77611	2.79731	2.77234	2.73804	2.43673	2.37358	2.35167	2.25577	2.37203	2.25356	2.55613	2.59072	2.56685	2.58066	2.53966	2.5817	2.50065	2.48329	2.47086	2.5832	2.4879	2.55383	2.47295	2.4416	2.39795	2.43144	2.42854	2.39257	NA	NA	2.78697	2.76923	2.38733	2.29379	2.57123	2.56734	2.48493	2.54164	2.4375	2.41751
ENSMUSG00000001909	Trmt1	5.90323	6.26535	5.80787	6.0141	6.09148	6.02144	6.64554	6.65984	6.78782	6.7084	6.68487	6.6875	6.32638	6.12939	6.11701	6.29776	6.26654	6.14069	6.53755	6.55624	6.51993	6.50235	6.50966	6.63405	6.52484	6.49222	6.51792	6.47746	6.67053	6.6561	6.30922	6.31074	6.21093	6.16523	6.18741	6.26812	5.99215	6.04234	6.69773	6.69359	6.19093	6.235	6.53791	6.54868	6.51166	6.60136	6.27696	6.20692
ENSMUSG00000001910	Nacc1	7.21164	6.9636	7.0176	6.98271	7.14719	7.15125	7.80129	7.78185	7.88903	7.70826	7.83266	7.89506	7.30505	7.16859	7.14091	7.21531	7.2286	7.30245	7.31532	7.2877	7.4809	7.33772	7.24027	7.4323	7.38596	7.34496	7.29907	7.58867	7.44803	7.36174	7.14666	7.07374	7.1978	7.04056	7.1053	7.24605	7.06428	7.09372	7.82406	7.81199	7.20485	7.24879	7.36131	7.33676	7.34333	7.46615	7.1394	7.13064
ENSMUSG00000001911	Nfix	8.88596	8.23058	8.66458	8.69499	8.74627	8.76913	9.47709	9.38478	9.41049	9.46944	9.46839	9.39018	8.89311	8.69248	8.72748	8.37253	8.79591	8.8837	9.10818	9.01913	9.29422	9.16601	9.15267	9.05252	8.94371	9.2814	9.22866	9.31826	9.18696	9.24988	8.77162	8.77518	8.78742	8.69647	8.83762	8.82749	8.5937	8.7368	9.42412	9.44267	8.77102	8.68405	9.14051	9.12373	9.15126	9.2517	8.77807	8.78719
ENSMUSG00000001924	Uba1	10.8225	10.7311	10.5257	10.6264	10.5877	10.6501	11.4289	11.1972	11.4137	11.3878	11.3213	11.2707	10.7793	10.6418	10.6192	10.6699	10.6179	10.6652	11.2383	11.2056	11.3927	11.2118	11.2836	11.3623	11.4946	11.208	11.1462	11.4224	11.4015	11.3522	11.4633	11.336	11.4404	11.4575	11.636	11.525	10.6931	10.6214	11.3466	11.3266	10.6801	10.651	11.2789	11.2859	11.2829	11.392	11.4132	11.5395
ENSMUSG00000001930	Vwf	NA	NA	NA	NA	NA	NA	3.0752	3.12526	2.98121	2.98944	2.97257	2.96932	2.91288	3.04691	3.11809	2.99763	2.89578	2.96814	3.29079	3.25498	3.2535	3.27139	3.36546	3.27273	2.93561	2.99365	3.03262	2.90656	2.97198	2.8835	2.96513	2.88092	2.93554	2.89773	2.89442	2.97113	NA	NA	3.06056	2.97711	3.02596	2.95385	3.26643	3.30319	2.98729	2.92068	2.9272	2.92109
ENSMUSG00000001942	Siae	6.54401	6.203	6.32558	6.36373	6.2833	6.31818	7.33201	7.44989	7.23069	7.32062	7.34717	7.32304	7.38544	7.9711	7.8574	7.63839	7.66412	7.56883	7.07126	6.99656	6.83087	7.05437	6.90908	6.86891	7.70511	7.76863	7.78962	7.51675	7.6702	7.67677	6.61931	6.86743	6.62271	6.70966	6.54374	6.66161	6.35753	6.32174	7.33753	7.33028	7.73798	7.62378	6.96623	6.94412	7.75446	7.62124	6.70315	6.63834
ENSMUSG00000001946	Esam	2.6701	2.47836	2.51949	2.55726	2.52037	2.61819	3.29407	3.25924	3.32928	3.20618	3.25208	3.22914	NA	NA	NA	NA	NA	NA	2.54815	2.5358	2.54797	2.47486	2.53596	2.47536	2.98701	2.95949	3.03907	2.87789	3.02422	2.87324	2.53015	2.53746	2.50732	2.55415	2.61252	2.51907	2.55599	2.56527	3.2942	3.22913	NA	NA	2.54397	2.49539	2.99519	2.92512	2.52498	2.56191
ENSMUSG00000001948	Spa17	4.03189	3.89345	4.12833	4.00307	3.88091	3.89689	4.58535	4.59002	4.5322	4.61614	4.53333	4.51072	4.30089	4.32772	4.15469	4.26973	4.11654	4.07828	4.59175	4.65674	4.65135	4.71027	4.7141	4.61847	4.87092	4.81112	4.789	4.65741	4.73262	4.75298	4.51097	4.60325	4.41228	4.64595	4.58611	4.42173	4.01789	3.92695	4.56919	4.55339	4.2611	4.15485	4.63328	4.68095	4.82368	4.71434	4.50884	4.55126
ENSMUSG00000001962	Fam50a	6.00159	6.04439	5.99179	5.95056	5.80764	6.02312	6.65821	6.53374	6.7572	6.66615	6.63343	6.74874	6.41469	6.16227	6.29151	6.30303	6.32114	6.35979	6.63469	6.50534	6.64061	6.64064	6.52183	6.49843	6.65291	6.468	6.6402	6.608	6.65165	6.66279	6.59963	6.59844	6.57259	6.44116	6.59835	6.53224	6.01259	5.9271	6.64972	6.68277	6.28949	6.32799	6.59355	6.55363	6.58704	6.64081	6.59022	6.52392
ENSMUSG00000001964	Emd	6.7299	6.89459	6.95143	6.83422	6.87517	6.88735	7.56774	7.45522	7.58116	7.69345	7.57661	7.49546	7.33578	7.44028	7.37708	7.50989	7.50064	7.50905	7.30947	7.36452	7.34459	7.29909	7.36197	7.42948	7.38574	7.41317	7.4869	7.47061	7.59141	7.42742	7.30612	7.31832	7.2044	7.32264	7.3477	7.27189	6.85864	6.86558	7.53471	7.58851	7.38438	7.50652	7.33953	7.36351	7.4286	7.49648	7.27628	7.31407
ENSMUSG00000001983	Taco1	5.94083	6.08438	5.96305	6.10042	6.11483	6.02625	6.62353	6.56771	6.67398	6.72386	6.68234	6.65902	6.0382	5.82652	5.874	5.94205	5.85376	5.90454	6.4661	6.47287	6.67954	6.52938	6.48293	6.54309	6.78604	6.41864	6.26603	6.69255	6.38246	6.40885	6.39288	6.42229	6.4059	6.31088	6.36152	6.42545	5.99609	6.0805	6.62174	6.68841	5.91291	5.90012	6.5395	6.51846	6.49024	6.49462	6.40702	6.36595
ENSMUSG00000001985	Grik3	7.70165	7.47678	7.32301	7.43935	7.55216	7.47583	8.56856	8.70051	8.57867	8.55009	8.56388	8.59058	8.38196	8.95814	8.85848	8.85471	8.65058	8.70236	8.3744	8.40067	8.23746	8.28816	8.24328	8.21149	8.72554	9.0175	9.13345	8.87836	8.87424	8.90214	7.88165	8.16416	7.89261	7.99309	7.8706	7.84458	7.50048	7.48911	8.61591	8.56818	8.73286	8.73588	8.33751	8.24765	8.95883	8.88491	7.97947	7.90276
ENSMUSG00000001986	Gria3	10.8612	11.0179	11.221	10.947	10.9768	11.1273	12.1769	12.4994	12.1635	12.2215	12.2281	12.2902	12.1857	13.0505	12.8026	12.9171	12.7075	12.6456	11.9643	12.123	11.8138	12.1011	11.9749	11.8532	12.5093	12.8602	13.0641	12.5672	12.6986	12.7798	11.3378	11.763	11.4753	11.4795	11.1773	11.2048	11.0334	11.017	12.2799	12.2466	12.6796	12.7567	11.967	11.9764	12.8112	12.6819	11.5254	11.2872
ENSMUSG00000001995	Sipa1l2	6.85615	6.75411	6.61726	6.81414	6.94929	6.97222	7.6465	7.98391	7.81586	7.72993	7.86655	7.72395	7.55496	7.64632	7.47951	7.43799	7.69707	7.66708	7.08862	7.03966	7.14628	7.25399	7.05128	7.1418	7.72156	7.27309	7.5081	7.36103	7.3564	7.40903	7.24755	7.19745	7.14285	7.11562	7.44297	7.35005	6.74251	6.91188	7.81543	7.77347	7.56026	7.60071	7.09152	7.14902	7.50092	7.37549	7.19595	7.30288
ENSMUSG00000001998	Ap4e1	4.83277	5.00812	5.0523	5.07617	4.93566	5.00846	6.16739	6.06774	6.01971	6.15378	6.10305	6.09364	5.63324	5.49462	5.67095	5.37175	5.67905	5.56702	5.99769	6.08879	5.99239	6.00805	6.08281	6.01421	6.37831	6.53332	6.3352	6.38056	6.34878	6.4423	5.30553	5.39895	5.39384	5.33111	5.29041	5.38631	4.9644	5.00676	6.08495	6.11683	5.5996	5.53928	6.02629	6.03502	6.41561	6.39055	5.36611	5.33595
ENSMUSG00000001999	Blvra	6.39753	6.83562	6.45499	6.68112	6.57192	6.81875	7.48652	7.40507	7.50862	7.40054	7.38622	7.49039	6.97897	6.97545	7.11337	6.96866	7.05697	6.98419	7.37706	7.20609	7.39293	7.34075	7.38322	7.51513	7.46283	7.38072	7.18728	7.35156	7.31745	7.30688	7.25214	7.11903	7.21945	7.205	7.31801	7.08231	6.56272	6.6906	7.46674	7.42572	7.0226	7.00327	7.32536	7.41303	7.34361	7.3253	7.19687	7.20177
ENSMUSG00000002006	Pdzd4	5.02639	5.1749	4.92466	5.04017	5.07509	5.05271	6.05839	6.12683	6.06409	5.99672	6.09257	5.88861	5.50613	5.52511	5.32063	5.6309	5.46906	5.61507	5.6356	5.60835	5.6958	5.52909	5.55115	5.73302	5.69325	5.72404	5.64611	5.68368	5.77525	5.53134	5.42626	5.37955	5.35306	5.38794	5.45862	5.56703	5.04199	5.05599	6.0831	5.99263	5.45062	5.57168	5.64658	5.60442	5.6878	5.66342	5.38629	5.4712
ENSMUSG00000002010	Idh3g	9.36859	9.24077	9.24066	9.24419	9.17407	9.17268	10.0363	9.93754	10.02	10.0349	10.026	9.9944	9.55679	9.31052	9.3796	9.41494	9.37162	9.27866	9.80727	9.76731	9.83869	9.74299	9.78957	9.92992	9.9432	9.79643	9.69488	9.83564	9.90685	9.83706	9.75958	9.69688	9.72641	9.79906	9.76197	9.85021	9.28334	9.19698	9.99793	10.0184	9.41563	9.35507	9.80442	9.82083	9.81151	9.85985	9.72762	9.80375
ENSMUSG00000002012	Pnck	6.61184	6.33277	6.18185	6.3883	6.40515	6.30144	7.13751	7.04859	7.01423	7.0379	7.13446	7.02775	6.74849	6.50224	6.43649	6.45256	6.44791	6.443	6.79739	6.91326	6.88867	6.73201	6.82841	6.85254	6.76984	6.81848	6.69112	6.95573	6.99664	6.78675	6.67479	6.57944	6.66965	6.71363	6.86289	6.85072	6.37549	6.36496	7.06678	7.0667	6.56241	6.44782	6.86644	6.80432	6.75981	6.91304	6.64129	6.80908
ENSMUSG00000002014	Ssr4	8.05211	8.23563	8.2948	8.21226	8.2494	8.43152	9.29346	9.32477	9.26055	9.22013	9.22743	9.23229	9.08268	9.37462	9.26075	9.25189	9.23266	9.07857	9.03269	9.12308	8.89658	8.97419	8.99223	8.88562	9.24455	9.50914	9.53688	9.32424	9.30507	9.35816	8.40133	8.3905	8.38071	8.48773	8.21109	8.25232	8.19418	8.29773	9.29292	9.22662	9.23935	9.18771	9.01745	8.95068	9.43019	9.32915	8.39085	8.31705
ENSMUSG00000002015	Bcap31	8.80275	8.97476	9.22793	9.07992	9.07337	9.0792	10.2434	10.3783	10.0605	10.2925	10.1759	10.1971	10.0639	10.5607	10.3918	10.3449	10.3282	10.2625	9.949	9.99714	9.76432	9.98423	9.88059	9.79613	10.1775	10.3901	10.4955	10.211	10.2267	10.246	9.3494	9.4822	9.39151	9.2693	9.05033	9.11288	9.00181	9.07749	10.2274	10.2218	10.3388	10.3118	9.90349	9.88698	10.3544	10.2279	9.4077	9.14417
ENSMUSG00000002017	Fam98a	6.94028	7.12601	6.83818	7.0147	6.87876	6.8729	7.55403	7.4205	7.46201	7.45213	7.47522	7.61495	7.1967	7.30762	7.12896	7.2392	7.00712	7.25262	7.35075	7.35464	7.37336	7.37511	7.38753	7.54671	7.38644	7.30762	7.285	7.31739	7.34288	7.31489	7.19645	7.15161	6.9506	7.17997	7.10063	7.22993	6.96816	6.92212	7.47885	7.5141	7.21109	7.16632	7.35958	7.43645	7.32635	7.32506	7.09955	7.17018
ENSMUSG00000002020	Ltbp2	4.30817	4.00109	4.1661	4.09082	4.22621	4.11105	5.67413	5.66488	5.56698	5.60191	5.59548	5.60759	5.38198	5.95132	6.16046	5.24933	5.77841	5.54364	4.85756	4.7892	4.89921	4.93305	4.88848	4.76764	5.84864	6.24699	6.48125	5.96335	6.01527	6.24409	5.20473	5.40035	5.30904	5.1151	5.34039	5.23337	4.15845	4.14269	5.63533	5.60166	5.83125	5.52379	4.84866	4.86306	6.19229	6.07424	5.30471	5.22962
ENSMUSG00000002028	Kmt2a	6.8192	6.92682	7.08279	6.98459	6.9167	6.83345	7.72447	7.76527	7.81439	7.76614	7.7162	7.7011	7.49886	7.67003	7.52262	7.36537	7.57629	7.42433	7.60568	7.48164	7.61641	7.5227	7.42638	7.5765	7.90527	7.88448	7.95772	7.82338	7.8192	7.73945	8.15047	8.03193	7.94527	8.0134	8.137	8.14581	6.94294	6.91158	7.76804	7.72781	7.56384	7.45533	7.56791	7.50853	7.91583	7.79401	8.04256	8.09874
ENSMUSG00000002031	Ift46	6.5004	6.50757	6.51448	6.55073	6.51844	6.51786	7.17496	7.19145	7.29485	7.16593	7.24995	7.29763	6.83284	6.77098	6.91539	6.86217	6.64677	6.65826	7.08261	6.88205	7.05087	7.02774	7.01995	6.9651	7.1688	7.07162	7.0001	7.07946	7.09888	7.1607	6.63761	6.53352	6.58289	6.61381	6.69875	6.54434	6.50748	6.52901	7.22042	7.23784	6.83974	6.7224	7.00518	7.00426	7.08017	7.11301	6.58467	6.61897
ENSMUSG00000002032	Tmem25	8.65017	8.828	8.79703	8.75119	8.89768	8.95474	9.75177	9.86293	9.73368	9.7266	9.77122	9.83873	9.56762	10.0614	9.99894	9.90647	9.81317	9.87727	9.41238	9.53776	9.4417	9.39706	9.45984	9.31178	9.82574	9.90732	10.1461	9.80004	9.73483	9.88356	9.14537	9.36671	9.12299	9.04967	9.05268	8.96989	8.7584	8.86787	9.78279	9.77885	9.87599	9.86564	9.46395	9.38956	9.95971	9.80614	9.21169	9.02408
ENSMUSG00000002043	Trappc6a	3.31598	3.44146	3.47674	3.48009	3.46418	3.43674	4.45687	4.45854	4.43832	4.4183	4.4288	4.38045	4.22565	4.10348	4.12214	4.22587	4.18495	4.14585	4.28475	4.29638	4.3766	4.24509	4.25962	4.28921	3.91621	4.06989	4.08039	4.17793	4.09377	4.08346	4.0437	4.02912	3.98103	3.95665	3.98477	4.02448	3.41139	3.46034	4.45124	4.40918	4.15043	4.18555	4.31924	4.26464	4.02216	4.11839	4.01795	3.98863
ENSMUSG00000002052	Supt6	8.26411	8.10218	7.94404	8.17637	8.2048	8.21623	8.61213	8.86772	8.9205	8.65393	8.90817	8.93836	8.40447	8.51852	8.50528	8.73469	8.65116	8.50259	8.22001	8.2025	8.379	8.35217	8.23911	8.46105	8.32171	8.2282	8.40589	8.38168	8.36754	8.28139	8.54584	8.36097	8.46505	8.39754	8.82283	8.68916	8.10344	8.19914	8.80012	8.83349	8.47609	8.62948	8.26717	8.35077	8.3186	8.34354	8.45728	8.63651
ENSMUSG00000002055	Spag5	7.21394	7.27893	7.23544	6.89276	7.01696	7.14565	8.02012	7.7544	7.93706	7.87157	7.86785	7.97079	7.27383	7.11156	7.06066	7.39332	7.31371	7.25797	7.72617	7.71115	7.52959	7.54134	7.5447	7.63066	7.32208	7.81739	7.90991	7.93188	8.17435	7.88736	7.34437	7.4668	7.42819	7.28877	7.3136	7.42792	7.24277	7.01846	7.90386	7.9034	7.14868	7.32167	7.65564	7.57223	7.68313	7.99787	7.41312	7.34343
ENSMUSG00000002058	Unc119	5.30097	5.75958	5.4359	5.54126	5.61847	5.58366	6.45793	6.36869	6.36291	6.38512	6.35198	6.30623	6.18887	6.05643	6.12812	6.15499	6.08535	6.0553	6.52458	6.43684	6.46517	6.43963	6.44387	6.56226	6.76017	6.64502	6.73844	6.71794	6.6009	6.60481	6.22476	6.07896	6.21721	6.26148	6.2536	6.24073	5.49881	5.58113	6.39651	6.34778	6.12447	6.09855	6.47553	6.48192	6.71454	6.64122	6.17364	6.25193
ENSMUSG00000002059	Rab34	2.39576	2.47376	2.39221	2.43154	2.44995	2.39136	2.92165	2.89799	2.85581	2.87112	2.82674	2.87401	2.47337	2.41409	2.46242	2.51481	2.5313	2.3639	2.24121	2.27353	2.20944	2.19753	2.2457	2.22113	2.66742	2.64673	2.67774	2.62757	2.7097	2.66584	NA	NA	NA	NA	NA	NA	2.42057	2.42428	2.89182	2.85729	2.44996	2.47	2.24139	2.22145	2.66396	2.6677	NA	NA
ENSMUSG00000002064	Sdf2	8.84038	8.61862	8.53474	8.47442	8.5277	8.63273	9.39538	9.45793	9.47883	9.40994	9.4197	9.48147	9.22118	9.40155	9.34347	9.34545	9.22946	9.25987	9.04299	9.19936	9.04708	9.1684	9.03366	9.07135	9.57439	9.48577	9.53322	9.42781	9.51033	9.41876	8.67561	8.75369	8.72247	8.71111	8.55104	8.68084	8.66458	8.54495	9.44405	9.43704	9.32207	9.27826	9.09648	9.09114	9.53113	9.4523	8.71726	8.64766
ENSMUSG00000002068	Ccne1	6.34597	6.54777	6.49494	6.51751	6.50484	6.49421	6.94349	7.06494	7.00407	6.92641	7.08584	7.0811	6.87978	6.93958	6.84209	6.95309	6.97682	6.81296	6.613	6.60202	6.55918	6.57617	6.58191	6.65955	6.89414	6.76573	6.73084	6.77683	6.6996	6.82644	6.36416	6.34414	6.33811	6.44548	6.2	6.41033	6.4629	6.50552	7.00416	7.03112	6.88715	6.91429	6.5914	6.60588	6.7969	6.76762	6.3488	6.35194
ENSMUSG00000002083	Bbc3	2.6955	2.72993	2.65196	2.70692	2.72108	2.69403	3.33633	3.35802	3.26364	3.29416	3.37089	3.28274	2.65748	2.41881	2.6536	2.46287	2.56091	2.54258	3.07689	3.08502	3.10975	3.19204	3.09976	3.15034	3.02449	3.18851	3.20105	3.14029	3.03004	3.17335	2.75596	2.69541	2.75363	2.7272	2.76173	2.75362	2.69246	2.70734	3.31933	3.31593	2.57663	2.52212	3.09055	3.14738	3.13802	3.11456	2.735	2.74752
ENSMUSG00000002100	Mybpc3	3.89045	3.74591	3.68323	3.90398	3.82102	3.84025	4.69982	4.72193	4.68262	4.6429	4.61556	4.75696	3.87165	3.76449	3.80993	3.82361	3.9678	3.95114	3.92916	3.91503	3.93851	3.97235	3.99069	3.90095	3.98701	4.04426	4.18262	4.20419	4.12009	4.07555	4.04132	4.0835	4.09674	4.13131	4.27008	4.21016	3.7732	3.85508	4.70146	4.67181	3.81536	3.91419	3.92756	3.95467	4.0713	4.13328	4.07385	4.20385
ENSMUSG00000002102	Psmc3	8.96639	8.85047	8.84112	8.70346	8.76795	8.85332	9.46071	9.54536	9.65952	9.48401	9.55394	9.58736	9.08919	9.10307	9.03256	9.10115	9.1519	9.05448	9.2621	9.10212	9.39132	9.2725	9.24166	9.38492	9.49989	9.28308	9.26602	9.32278	9.36017	9.3006	9.47271	9.30715	9.30272	9.33373	9.51991	9.42353	8.88599	8.77491	9.5552	9.54177	9.07494	9.10251	9.25185	9.29969	9.34966	9.32785	9.36086	9.42572
ENSMUSG00000002103	Acp2	8.4943	8.5764	8.67357	8.60056	8.54667	8.66674	9.67928	9.79956	9.47657	9.62591	9.59694	9.67445	9.67593	10.33	10.1025	10.0051	9.91565	9.97138	9.56257	9.5946	9.31625	9.43024	9.48488	9.37294	9.74963	10.1973	10.3647	9.93869	10.0006	10.0832	9.03753	9.21616	9.00502	9.05855	8.91607	8.92113	8.58142	8.60466	9.6518	9.63244	10.0362	9.96405	9.49114	9.42935	10.1039	10.0075	9.08624	8.96525
ENSMUSG00000002105	Slc39a13	5.48091	5.52665	5.27583	5.48544	5.56516	5.6719	6.50498	6.46673	6.45654	6.46798	6.46221	6.50059	6.32576	6.6549	6.36848	6.75765	6.60438	6.43426	5.97653	6.04594	5.98327	5.97303	5.97712	6.00086	6.10258	5.91672	6.2038	5.91674	5.85039	5.77764	5.29291	5.34849	5.37377	5.21551	5.42187	5.35188	5.4278	5.57416	6.47609	6.47693	6.44971	6.59876	6.00191	5.98367	6.07436	5.84826	5.33839	5.32975
ENSMUSG00000002107	Celf2	10.0219	9.81597	10.0147	9.76147	9.76597	9.77492	10.5638	10.34	10.5514	10.5323	10.4458	10.5532	10.0899	10.0974	10.1936	10.2099	10.0535	10.2068	10.3311	10.3766	10.3933	10.3071	10.3735	10.3045	10.4753	10.4504	10.4495	10.573	10.5972	10.5448	10.0415	10.0348	10.0114	10.0685	10.0337	9.96194	9.95086	9.76745	10.4851	10.5105	10.127	10.1568	10.367	10.3284	10.4584	10.5717	10.0292	10.0214
ENSMUSG00000002108	Nr1h3	2.20839	2.28704	2.21579	2.3067	2.30238	2.2606	2.95378	2.92411	2.9198	2.91332	2.94971	2.91163	2.71474	2.58845	2.6065	2.62651	2.73248	2.67084	2.92509	2.97732	2.97589	2.98277	2.98344	3.02866	3.18843	3.05335	3.07834	3.18407	3.0945	3.04939	2.96581	2.9473	2.93919	2.93628	2.99707	3.09789	2.23707	2.28989	2.93256	2.92489	2.63656	2.67661	2.95943	2.99829	3.10671	3.10932	2.95076	3.01042
ENSMUSG00000002109	Ddb2	3.01813	3.01647	3.05531	3.05499	3.17459	3.15272	4.18713	4.20871	4.19943	4.16227	4.25696	4.16978	3.7351	3.84983	3.83224	3.80336	3.95003	3.73399	4.1444	4.1514	4.1278	4.1243	4.08993	4.15753	4.46226	4.48865	4.40853	4.48043	4.47141	4.55057	4.32768	4.34852	4.391	4.40965	4.44119	4.42575	3.02997	3.12744	4.19842	4.19634	3.80573	3.82913	4.1412	4.12392	4.45315	4.5008	4.35573	4.42553
ENSMUSG00000002129	Sf3a1	8.40479	8.49508	8.43787	8.33779	8.41672	8.32622	9.2706	9.20385	9.17142	9.33207	9.20482	9.16703	8.78894	8.67591	8.71481	8.61351	8.69955	8.75367	9.16623	9.25444	9.13345	9.12581	9.23817	9.16584	9.45763	9.59759	9.60411	9.53363	9.55511	9.60882	9.25521	9.38583	9.29142	9.12438	9.13346	9.16358	8.44591	8.36024	9.21529	9.23464	8.72655	8.68891	9.18471	9.17661	9.55311	9.56585	9.31082	9.14048
ENSMUSG00000002147	Stat6	3.76834	3.78821	3.86302	3.83167	3.81814	3.85925	5.13552	5.14256	5.30944	5.0751	5.24098	5.28435	4.72731	4.45465	4.38608	4.40989	4.6988	4.30478	4.45202	4.51643	4.32317	4.41794	4.353	4.38098	4.63844	4.65001	4.61268	4.53846	4.58976	4.4659	4.30138	4.22911	4.28773	4.28344	4.30657	4.26378	3.80653	3.83635	5.19584	5.20014	4.52268	4.47116	4.43054	4.38397	4.63371	4.53137	4.27274	4.2846
ENSMUSG00000002190	Clgn	6.7539	6.90735	7.15596	7.13478	7.01059	6.97214	8.12085	8.34846	8.06297	8.11675	8.05386	8.18285	8.38226	8.84175	8.70899	8.37316	8.70016	8.42073	8.02563	7.9187	7.76732	8.02118	8.06457	7.77386	8.71328	8.75158	8.75676	8.41107	8.45758	8.55964	7.51599	7.62121	7.58922	7.53112	7.26955	7.29575	6.93907	7.03917	8.17743	8.11782	8.64434	8.49801	7.90388	7.9532	8.74054	8.4761	7.57548	7.36547
ENSMUSG00000002205	Vrk3	5.5478	5.58584	5.38434	5.45437	5.42485	5.56309	6.18211	6.05258	6.08756	6.05583	6.16444	6.0553	5.66531	5.55346	5.41695	5.78708	5.42107	5.49811	5.91645	5.96898	5.96532	5.99385	5.90483	5.91317	5.76077	5.78422	5.88819	5.86894	5.82843	5.83727	5.65315	5.56609	5.63359	5.4791	5.64637	5.57645	5.50599	5.48077	6.10742	6.09186	5.54524	5.56875	5.95025	5.93728	5.81106	5.84488	5.61761	5.56731
ENSMUSG00000002210	Smg9	6.13736	5.89366	6.06039	5.70285	5.95358	5.67862	6.50605	6.48646	6.58397	6.61808	6.44338	6.66023	6.07888	5.84995	5.9231	6.0466	5.87969	5.81375	6.35522	6.26056	6.38883	6.25108	6.23502	6.31786	6.29077	6.14532	6.13206	6.25372	6.18791	6.20563	6.36744	6.23242	6.28032	6.21072	6.52245	6.27305	6.03047	5.77835	6.52549	6.5739	5.95064	5.91335	6.33487	6.26799	6.18938	6.21576	6.29339	6.33541
ENSMUSG00000002221	Paxip1	5.45079	5.46489	5.39059	5.61732	5.59111	5.64928	6.64387	6.65288	6.61765	6.65591	6.65965	6.63599	6.12278	5.99064	5.90791	6.02362	6.06299	5.9562	6.31881	6.23435	6.23034	6.22589	6.24702	6.27937	6.34029	6.34983	6.41324	6.49974	6.44362	6.40637	5.93846	5.86551	5.87551	5.84001	5.91297	5.9999	5.43542	5.61924	6.63813	6.65051	6.00711	6.01427	6.26116	6.25076	6.36779	6.44991	5.89316	5.91763
ENSMUSG00000002222	Rmnd5a	8.73492	8.8152	9.01779	8.88649	8.87927	8.74158	9.77129	9.83762	9.71353	9.81961	9.7549	9.78308	9.44955	9.58425	9.69383	9.46442	9.54856	9.49101	9.62181	9.56243	9.58615	9.68291	9.67973	9.43531	9.77026	10.0321	9.99212	10.0298	9.97043	10.0267	8.97139	9.08582	9.16733	9.07194	8.87378	8.97581	8.85597	8.83578	9.77415	9.78587	9.57588	9.50133	9.59013	9.59932	9.93151	10.009	9.07485	8.97384
ENSMUSG00000002228	Ppm1j	2.69138	2.67358	2.61212	2.56819	2.68483	2.72029	3.32018	3.24226	3.26693	3.2141	3.31131	3.26568	2.88602	2.94243	2.91437	2.95334	2.77566	3.01912	2.8175	2.77588	2.82966	2.77154	2.75403	2.73662	3.1087	3.1675	3.11534	3.16111	3.25156	3.19624	NA	NA	NA	NA	NA	NA	2.65903	2.65777	3.27646	3.2637	2.91427	2.91604	2.80768	2.75406	3.13051	3.20297	NA	NA
ENSMUSG00000002233	Rhoc	NA	NA	NA	NA	NA	NA	NA	NA	NA	NA	NA	NA	NA	NA	NA	NA	NA	NA	NA	NA	NA	NA	NA	NA	NA	NA	NA	NA	NA	NA	1.88441	1.9318	1.91846	1.92466	1.94871	1.9418	NA	NA	NA	NA	NA	NA	NA	NA	NA	NA	1.91156	1.93839
ENSMUSG00000002250	Ppard	6.3138	6.27034	5.95175	6.05324	6.01142	6.09978	6.47208	6.58168	6.65284	6.39922	6.52663	6.53783	6.4366	6.5813	6.84216	6.87534	6.6771	6.68349	5.85809	6.03249	6.03137	5.99894	6.00035	5.95436	6.31268	6.40444	6.42106	6.2422	6.26101	6.35693	5.75877	5.74231	5.71854	5.44919	5.58647	5.60266	6.17863	6.05482	6.56887	6.4879	6.62002	6.74531	5.97399	5.98455	6.3794	6.28671	5.73987	5.54611
ENSMUSG00000002257	Def6	NA	NA	NA	NA	NA	NA	2.34532	2.34961	2.31741	2.3077	2.33724	2.38836	NA	NA	NA	NA	NA	NA	NA	NA	NA	NA	NA	NA	2.65696	2.63403	2.66097	2.61089	2.61195	2.60418	1.84509	1.84891	1.85251	1.82999	1.92131	1.92017	NA	NA	2.33744	2.34443	NA	NA	NA	NA	2.65066	2.60901	1.84884	1.89049
ENSMUSG00000002265	Peg3	9.20382	9.19466	8.93515	9.25916	9.21477	9.19675	9.67095	9.75092	9.83582	9.71524	9.75345	9.81888	9.61158	9.88673	9.88369	9.93136	9.93572	9.78782	9.47101	9.43989	9.69846	9.51958	9.61099	9.70305	9.8901	9.75631	9.77894	9.72787	9.76778	9.65798	9.94961	9.97744	9.86758	9.82058	10.0044	9.89931	9.11121	9.22356	9.75256	9.76252	9.794	9.88497	9.53645	9.61121	9.80845	9.71787	9.93154	9.90809
ENSMUSG00000002266	Zim1	NA	NA	NA	NA	NA	NA	2.26028	2.27947	2.31179	2.3556	2.26526	2.29975	2.24395	2.07425	2.186	2.14091	2.21011	2.12267	NA	NA	NA	NA	NA	NA	NA	NA	NA	NA	NA	NA	NA	NA	NA	NA	NA	NA	NA	NA	2.28385	2.30687	2.16806	2.1579	NA	NA	NA	NA	NA	NA
ENSMUSG00000002274	Metrn	2.54663	2.4942	2.44192	2.48338	2.50617	2.56558	3.44488	3.46778	3.43049	3.41954	3.44703	3.45869	2.98942	3.17873	3.02376	2.91308	2.99096	3.12547	2.69709	2.65904	2.6597	2.63812	2.65283	2.68517	2.73258	2.68844	2.68623	2.66867	2.78204	2.70679	2.49503	2.50144	2.55777	2.55757	2.52901	2.48131	2.49425	2.51838	3.44772	3.44175	3.06397	3.00984	2.67194	2.65871	2.70242	2.71917	2.51808	2.52263
ENSMUSG00000002279	Lmf1	5.58255	5.69993	5.53602	5.70357	6.0069	5.89939	6.80933	7.00118	6.9014	6.84123	6.92191	6.88279	6.82082	7.46145	7.16573	7.20463	7.29634	7.19671	6.32001	6.42521	6.33479	6.42129	6.29959	6.21132	6.64389	6.90944	7.06449	6.81576	6.84174	6.78182	6.11681	6.11284	6.10281	5.99606	5.91083	5.84472	5.60617	5.86995	6.90397	6.88198	7.14933	7.23256	6.36001	6.31073	6.8726	6.81311	6.11082	5.9172
ENSMUSG00000002280	Ciao3	6.35743	6.05392	6.02598	5.8842	5.9583	6.00064	6.5401	6.49226	6.59404	6.52616	6.57125	6.66299	6.3262	6.30659	6.37241	6.31678	6.20777	6.20975	6.4717	6.44623	6.66333	6.43207	6.45738	6.56319	6.5702	6.39209	6.33485	6.52082	6.38046	6.41156	6.07738	5.94726	6.05979	6.17285	6.23413	6.13492	6.14578	5.94771	6.54213	6.5868	6.33507	6.24476	6.52709	6.48421	6.43238	6.43761	6.02814	6.18063
ENSMUSG00000002297	Dbf4	NA	NA	NA	NA	NA	NA	2.20177	2.2356	2.20686	2.18549	2.21457	2.23453	NA	NA	NA	NA	NA	NA	1.94806	1.91703	1.93309	1.98115	1.94513	1.97038	2.45281	2.47805	2.45752	2.50593	2.5233	2.35884	1.70335	1.69196	1.68524	1.76951	1.74084	1.74598	NA	NA	2.21474	2.21153	NA	NA	1.93273	1.96555	2.4628	2.46269	1.69352	1.75211
ENSMUSG00000002307	Daxx	5.32935	5.46193	5.56424	5.6978	5.68849	5.71882	6.29956	6.22712	6.28821	6.17348	6.26562	6.17972	5.82079	5.58153	5.60979	5.76479	5.91234	5.47505	6.01254	6.05335	6.16161	5.99804	6.08007	6.15884	6.21616	6.14924	6.08277	6.21895	6.12575	6.01692	5.39139	5.36329	5.3851	5.32586	5.46484	5.42873	5.45184	5.7017	6.27163	6.20627	5.6707	5.71739	6.07583	6.07899	6.14939	6.12054	5.37992	5.40648
ENSMUSG00000002308	Cd320	5.76144	5.79187	5.7575	5.53733	5.60644	5.87688	6.52093	6.62548	6.66972	6.55683	6.55156	6.54996	6.32083	6.82383	6.64777	6.67081	6.6172	6.50614	6.41671	6.51345	6.42346	6.44325	6.30903	6.2015	6.95837	6.71822	6.71461	6.58208	6.70495	6.67741	5.84537	5.71829	5.74782	5.73878	5.80582	5.75451	5.77027	5.67355	6.60538	6.55278	6.59748	6.59805	6.45121	6.31793	6.79707	6.65481	5.77049	5.76637
ENSMUSG00000002319	Ipo4	6.04571	5.79581	5.40119	5.69388	5.76467	5.75995	6.06938	6.17467	6.24072	6.08789	6.31101	6.20898	5.69487	5.56459	5.65464	5.75441	5.54581	5.69086	5.81581	5.70817	5.9255	5.73527	5.65522	5.69247	5.99662	5.62756	5.53248	5.88011	5.87108	5.61283	5.82113	5.6079	5.67973	5.66852	5.7072	5.658	5.74757	5.7395	6.16159	6.20263	5.63803	5.66369	5.81649	5.69432	5.71889	5.78801	5.70292	5.67791
ENSMUSG00000002320	Tm9sf1	6.76705	6.85581	6.79338	6.63734	6.83306	6.81999	7.71253	7.89661	7.62488	7.81142	7.82135	7.7923	7.82811	8.38224	8.13827	8.28147	8.10678	8.10658	7.27955	7.34076	7.22572	7.33847	7.13434	7.21402	7.6421	7.91009	8.16591	7.75177	7.78288	7.86206	6.80865	6.88332	6.71727	6.84615	6.7555	6.57119	6.80541	6.76346	7.74467	7.80836	8.11621	8.16494	7.28201	7.22894	7.90603	7.7989	6.80308	6.72428
ENSMUSG00000002324	Rec8	5.29378	5.26546	5.3585	5.36113	5.42247	5.43028	6.25462	6.21593	6.04717	6.15235	6.07833	6.20962	5.75736	5.33598	5.51148	5.26109	5.43912	5.48361	6.13305	5.90724	6.05853	5.99826	6.03368	6.03336	6.03729	5.94353	6.00726	6.28616	5.97802	6.04392	6.0009	5.88586	5.88773	6.00075	6.07127	6.14774	5.30591	5.40463	6.17257	6.14677	5.53494	5.39461	6.03294	6.02177	5.99602	6.1027	5.92483	6.07325
ENSMUSG00000002325	Irf9	NA	NA	NA	NA	NA	NA	1.70626	1.75734	1.72856	1.7129	1.72339	1.78353	NA	NA	NA	NA	NA	NA	3.19495	3.1265	3.37613	3.1698	3.16818	3.18324	3.14347	3.10029	3.08333	3.36531	3.19646	3.33958	3.21852	3.22697	3.20649	3.35375	3.43649	3.3477	NA	NA	1.73072	1.73994	NA	NA	3.23253	3.17374	3.10903	3.30045	3.21733	3.37931
ENSMUSG00000002326	Gmpr2	5.34544	5.59434	5.50534	5.53605	5.40676	5.56147	6.36572	6.2346	6.45123	6.34316	6.38569	6.31574	5.90789	5.89479	5.84445	6.07043	5.88407	6.03378	6.28841	6.221	6.25287	6.1461	6.17529	6.18754	6.39897	6.24052	6.23121	6.25265	6.16329	6.29552	6.05446	5.95129	5.97402	5.98238	5.90522	6.02596	5.48171	5.50143	6.35052	6.3482	5.88238	5.99609	6.25409	6.16964	6.29023	6.23715	5.99325	5.97119
ENSMUSG00000002329	Mdp1	5.90491	5.81099	5.76321	5.68437	5.79277	5.84969	6.50223	6.43494	6.6076	6.54424	6.448	6.59589	5.986	6.06577	6.00772	6.09567	6.05783	6.17565	6.38308	6.27077	6.36548	6.22555	6.19279	6.38966	6.52306	6.36278	6.33878	6.31468	6.35852	6.42857	5.89386	5.83369	5.98668	5.87212	5.89139	5.82608	5.82637	5.77561	6.51492	6.52938	6.01983	6.10972	6.33978	6.26933	6.40821	6.36725	5.90474	5.8632
ENSMUSG00000002332	Dhrs1	7.30394	7.06875	6.9952	7.09294	7.05971	7.14048	7.88586	7.77415	7.85402	7.80085	7.85157	7.77678	7.4472	7.5523	7.53584	7.72252	7.59321	7.60557	7.5658	7.59743	7.72171	7.61781	7.54879	7.60487	7.78331	7.75578	7.76383	7.78072	7.7937	7.73412	7.63649	7.63779	7.57038	7.67445	7.76919	7.64712	7.12263	7.09771	7.83801	7.80974	7.51178	7.64043	7.62831	7.59049	7.76764	7.76951	7.61488	7.69692
ENSMUSG00000002341	Ncan	6.49639	6.80092	6.50621	6.7148	6.62342	6.63182	7.74627	8.01853	7.76352	7.79239	7.85284	7.90733	8.03666	8.67868	8.41564	8.28927	8.29564	8.26371	7.50132	7.65826	7.55014	7.66573	7.62792	7.64652	8.21338	8.42836	8.41233	8.05092	7.98272	8.18732	7.53942	7.64071	7.42896	7.4828	7.5044	7.46553	6.60117	6.65668	7.84277	7.85085	8.37699	8.28287	7.5699	7.64672	8.35136	8.07365	7.53637	7.48424
ENSMUSG00000002342	Tmem161a	4.60755	4.36731	4.35465	4.4151	4.42399	4.45034	5.52883	5.65767	5.54828	5.51164	5.61548	5.50822	5.72598	6.13747	5.82299	5.81237	5.77817	5.84585	4.93613	4.96827	4.9326	4.87059	4.97343	4.85466	5.07305	5.01313	5.28079	5.13182	4.9574	4.96405	4.67305	4.66946	4.56286	4.56987	4.73024	4.62008	4.44317	4.42981	5.57826	5.54511	5.89548	5.81213	4.94567	4.89956	5.12232	5.01776	4.63513	4.64006
ENSMUSG00000002343	Armc6	6.01861	5.86219	5.63892	5.81975	5.72527	5.66649	6.31	6.15042	6.28367	6.24622	6.30801	6.26779	5.94287	5.77348	5.85136	5.83143	5.88876	5.78714	5.97407	5.98635	6.01389	6.13895	6.00605	6.23514	5.75274	5.8051	5.64514	5.89561	5.78868	5.78643	6.08314	6.03264	5.91772	6.00943	6.26608	6.16965	5.83991	5.73717	6.24803	6.27401	5.8559	5.83578	5.99144	6.12671	5.73432	5.82357	6.01117	6.14839
ENSMUSG00000002345	Borcs8	4.91356	5.19414	4.91849	5.01589	5.05093	4.98559	5.81513	5.77734	5.90716	5.74749	5.85604	5.68862	5.46275	5.40931	5.49243	5.56975	5.40072	5.45269	5.57458	5.62132	5.72747	5.45705	5.55865	5.59768	5.5843	5.60529	5.74381	5.66136	5.44218	5.66855	5.3388	5.21864	5.43479	5.31859	5.5448	5.52373	5.00873	5.01747	5.83321	5.76405	5.45483	5.47439	5.64112	5.5378	5.64447	5.5907	5.33074	5.46237
ENSMUSG00000002346	Slc25a42	4.96037	4.83094	4.86103	4.813	4.7513	4.77813	5.45993	5.52093	5.5456	5.52584	5.54859	5.55336	5.39362	5.19607	5.35127	5.27322	5.34256	5.33755	5.2521	5.20293	5.16004	5.20233	5.18581	5.21538	5.44165	5.48251	5.45643	5.48787	5.45705	5.4339	5.06354	5.10741	5.05066	4.99509	5.003	5.11476	4.88411	4.78081	5.50882	5.5426	5.31365	5.31778	5.20502	5.20117	5.4602	5.45961	5.07387	5.03762
ENSMUSG00000002365	Snx9	3.7085	3.8	3.78248	3.72633	3.68273	3.83099	4.96752	4.93247	4.9925	4.87098	4.9102	4.93696	4.37642	4.55167	4.5581	4.39495	4.36052	4.62127	4.48743	4.49175	4.55501	4.46398	4.50879	4.52662	4.46237	4.43865	4.47762	4.41388	4.44165	4.49437	4.46443	4.60028	4.4409	4.4792	4.55195	4.46586	3.76366	3.74668	4.96416	4.90605	4.49539	4.45891	4.5114	4.4998	4.45955	4.44997	4.50187	4.499
ENSMUSG00000002372	Ranbp3	7.83458	7.73371	7.82693	7.77977	7.91417	7.8802	8.56447	8.40314	8.55045	8.5801	8.51084	8.58763	8.19485	7.93642	7.77517	7.90291	7.97164	7.81316	8.30226	8.30635	8.38606	8.35896	8.2652	8.31766	8.43028	8.3361	8.34069	8.52881	8.51715	8.37351	8.20065	8.05025	8.16948	7.96791	8.13733	8.18473	7.79841	7.85804	8.50602	8.55953	7.96881	7.8959	8.33156	8.31394	8.36902	8.47316	8.14012	8.09666
ENSMUSG00000002379	Ndufa11	8.59077	8.60909	8.15135	8.27149	8.33373	8.49017	9.17664	8.97637	9.09055	9.13806	9.05231	8.98727	8.84448	8.86193	8.94417	8.8307	8.74007	8.85784	9.03694	9.05516	9.01293	8.97948	8.95536	9.05565	9.2337	9.07349	9.03992	9.03447	8.99845	9.10253	8.93951	8.86382	8.79337	8.86558	9.01952	9.04192	8.45041	8.36513	9.08119	9.05921	8.88353	8.80954	9.03501	8.99683	9.11571	9.04515	8.86557	8.97567
ENSMUSG00000002393	Nr2f6	5.04748	4.9744	4.80328	4.93554	5.02549	5.06192	5.80206	5.72775	5.80188	5.7843	5.82219	5.748	5.15196	5.47368	5.52574	5.67785	5.52018	5.40057	5.13035	5.16771	5.19813	5.11567	5.13996	5.15559	5.29675	5.35769	5.4637	5.4768	5.36474	5.47916	4.82695	5.01173	4.88234	4.81865	4.92595	4.90553	4.94172	5.00765	5.77723	5.78483	5.38379	5.53287	5.1654	5.13707	5.37271	5.44024	4.90701	4.88338
ENSMUSG00000002395	Use1	6.41234	6.51287	6.69819	6.60103	6.58775	6.52588	7.30383	7.32635	7.29666	7.27947	7.31832	7.36349	6.96056	6.85742	7.07779	6.93014	6.9172	7.03678	7.18709	7.14224	7.2307	7.23749	7.12401	7.15896	7.25779	7.25756	7.21781	7.14147	7.31122	7.27561	6.9678	6.85359	6.95018	6.91837	6.92822	6.84622	6.54113	6.57155	7.30895	7.32043	6.96526	6.96137	7.18668	7.17349	7.24439	7.24277	6.92386	6.8976
ENSMUSG00000002396	Ocel1	NA	NA	NA	NA	NA	NA	1.79465	1.78563	1.81038	1.81634	1.77025	1.77918	NA	NA	NA	NA	NA	NA	NA	NA	NA	NA	NA	NA	2.12445	2.13057	2.13448	2.09962	2.08288	2.12944	2.11541	2.16351	2.14397	2.10029	2.12456	2.08326	NA	NA	1.79689	1.78859	NA	NA	NA	NA	2.12984	2.10398	2.14097	2.1027
ENSMUSG00000002409	Dyrk1b	4.84189	4.90097	4.79754	4.80458	4.87978	4.9058	5.35372	5.57713	5.42084	5.3449	5.5078	5.40403	5.08592	5.31085	5.43981	5.19554	5.30476	5.32803	5.125	5.26284	5.12647	5.25228	5.16147	5.22345	5.43047	5.49775	5.60311	5.45577	5.46026	5.34014	5.04945	4.98792	5.00184	5.08639	5.06418	5.1102	4.8468	4.86338	5.45056	5.41891	5.27886	5.27611	5.17144	5.2124	5.51044	5.41872	5.01307	5.08692
ENSMUSG00000002413	Braf	8.57636	8.59219	8.71165	8.68171	8.67342	8.69081	9.52461	9.63915	9.54713	9.55322	9.63422	9.63222	9.15376	9.10676	9.05632	9.20663	9.2636	9.26851	9.32808	9.33315	9.29965	9.32713	9.32399	9.31147	9.48976	9.74737	9.66713	9.63439	9.64699	9.71557	8.98577	9.10847	9.07402	9.15859	9.03079	9.00825	8.62673	8.68198	9.5703	9.60655	9.10561	9.24625	9.32029	9.32086	9.63476	9.66565	9.05609	9.06588
ENSMUSG00000002416	Ndufb2	7.7167	7.43783	7.60985	7.43744	7.50739	7.56377	8.23717	8.22677	8.30778	8.28099	8.12452	8.24841	7.83911	7.99156	7.92257	8.01994	7.91565	8.00683	8.1168	8.11319	8.16664	8.27119	8.1011	8.05037	8.42626	8.27284	8.39769	8.38318	8.30854	8.34466	7.78971	7.6782	7.78128	7.57048	7.60555	7.6182	7.58812	7.50286	8.25724	8.21797	7.91775	7.98081	8.13221	8.14089	8.3656	8.34546	7.74973	7.59807
ENSMUSG00000002428	Hltf	5.63305	5.51116	5.49205	5.61762	5.48548	5.53538	6.13764	6.22583	6.14688	6.16201	6.21134	6.19883	6.08268	6.05663	6.14292	6.21191	6.12229	6.05553	6.11265	6.19632	6.11255	6.21532	6.24068	6.17535	6.36304	6.14857	6.20558	6.43578	6.3428	6.30106	6.36196	6.38918	6.47935	6.45802	6.23064	6.47988	5.54542	5.54616	6.17012	6.19073	6.09408	6.12991	6.14051	6.21045	6.23906	6.35988	6.41016	6.38951
ENSMUSG00000002455	Prpf6	7.3473	7.10778	7.27003	7.10042	7.11944	7.06519	7.54946	7.60976	7.72539	7.59281	7.61257	7.69045	7.39322	7.71045	7.63591	7.68973	7.66399	7.57094	7.40053	7.5054	7.62981	7.55444	7.47884	7.57638	7.91496	7.59622	7.70643	7.6942	7.64537	7.61248	7.91456	7.86405	7.75183	7.80834	7.95161	7.83294	7.2417	7.09502	7.6282	7.63194	7.57986	7.64156	7.51191	7.53656	7.73921	7.65068	7.84348	7.86429
ENSMUSG00000002458	Rgs19	3.41187	3.26631	3.2186	3.30844	3.32174	3.39667	4.39188	4.42664	4.34065	4.3862	4.42633	4.38567	3.72128	3.67296	3.55177	3.64375	3.59604	3.63866	3.9992	3.9623	4.05393	3.93287	3.94834	3.97811	4.2002	4.22944	4.09791	4.05411	4.11188	4.15192	3.72044	3.72382	3.65153	3.80752	3.75557	3.70898	3.29892	3.34229	4.38639	4.3994	3.64867	3.62615	4.00514	3.9531	4.17585	4.10597	3.6986	3.75735
ENSMUSG00000002459	Rgs20	3.58203	3.69331	3.65248	3.73187	3.751	3.72108	4.64018	4.65574	4.57814	4.7292	4.7128	4.66393	4.30689	4.26841	4.31122	4.22328	4.29485	4.17169	4.64958	4.61337	4.63785	4.60949	4.62259	4.63209	4.80279	4.8538	4.758	4.72035	4.75847	4.83231	3.89707	3.92544	3.9959	4.09563	3.94574	3.96853	3.6426	3.73465	4.62469	4.70198	4.29551	4.22994	4.6336	4.62139	4.80487	4.77038	3.93947	4.0033
ENSMUSG00000002475	Abhd3	9.53873	9.72573	9.72336	9.56719	9.63686	9.74022	10.4393	10.5332	10.5711	10.4257	10.5921	10.6668	10.219	10.8712	10.565	10.9097	10.5796	10.5624	9.82511	9.90182	9.77067	9.85467	9.69337	9.79458	9.8582	9.80497	10.1017	9.90516	9.99253	9.77991	9.13703	9.15852	9.21473	8.96294	8.91976	8.89674	9.66261	9.64809	10.5145	10.5615	10.5517	10.6839	9.83253	9.78087	9.92163	9.89253	9.17009	8.92648
ENSMUSG00000002477	Snrpd1	7.3334	7.40511	7.59583	7.47031	7.18524	7.26538	7.98204	7.95272	8.04274	7.99809	7.97052	7.98001	7.6325	7.37433	7.34689	7.49189	7.44172	7.49691	7.93351	7.91823	8.02623	7.96614	8.05813	8.00608	8.19196	8.01025	8.03431	8.14621	8.09259	8.20262	7.41155	7.29808	7.43732	7.56926	7.27978	7.42584	7.44478	7.30698	7.9925	7.98287	7.45124	7.47684	7.95932	8.01012	8.07884	8.14714	7.38232	7.42496
ENSMUSG00000002486	Tchp	3.60996	3.57314	3.67974	3.56285	3.61926	3.61378	4.41971	4.41837	4.41472	4.3825	4.40081	4.45643	4.0418	4.14524	4.29101	4.36182	4.11133	4.26633	4.33464	4.32746	4.42482	4.43456	4.31709	4.31733	4.20704	4.08571	4.28862	4.40069	4.1193	4.20196	3.94288	4.02296	3.97458	3.87557	4.08738	4.07257	3.62095	3.59863	4.4176	4.41324	4.15935	4.24649	4.36231	4.35632	4.19379	4.24065	3.98014	4.01184
ENSMUSG00000002489	Tiam1	8.96246	8.44367	8.55023	8.69022	8.6851	8.65826	9.39709	9.17954	9.2696	9.33968	9.21554	9.18951	8.86608	8.57992	8.67088	8.36054	8.70987	8.62715	8.83103	8.82034	9.10772	8.96547	8.88154	8.96529	9.06249	8.89966	8.80375	8.98994	8.85315	8.8235	8.68925	8.56108	8.60776	8.3541	8.65517	8.54173	8.65212	8.67786	9.28208	9.24824	8.70563	8.56585	8.9197	8.93743	8.92197	8.88887	8.61936	8.517
ENSMUSG00000002496	Tsc2	8.44515	8.2498	8.17321	8.30008	8.23142	8.29328	9.0744	8.87422	8.98655	9.06977	9.0318	8.92665	8.69843	8.582	8.48876	8.53231	8.58195	8.57765	8.77009	8.79034	8.80761	8.77012	8.6863	8.75515	9.00824	8.90133	8.83442	8.93369	8.94443	8.85984	8.54492	8.4833	8.45025	8.35295	8.49994	8.5255	8.28939	8.27493	8.97839	9.00941	8.58973	8.56397	8.78935	8.73719	8.91467	8.91266	8.49282	8.45946
ENSMUSG00000002504	Slc9a3r2	6.93027	6.65422	6.582	6.67962	6.7216	6.63394	7.18116	7.20148	7.31268	7.27511	7.11262	7.24496	6.8674	6.85202	7.06682	6.88431	6.97899	6.90701	7.06954	7.03392	7.27815	7.09614	7.09242	7.12468	7.22727	7.08309	7.1867	7.05125	7.00284	7.15157	7.05383	6.93244	6.99023	6.72545	6.9379	6.92993	6.72216	6.67838	7.23177	7.2109	6.92875	6.92344	7.1272	7.10441	7.16569	7.06855	6.99216	6.86443
ENSMUSG00000002524	Puf60	8.99129	9.23746	9.09384	9.14287	9.16838	9.1595	10.0222	9.91237	9.97009	10.0108	9.95169	9.92776	9.44163	9.14472	9.17659	9.17246	9.23609	9.17462	9.82886	9.79554	9.88785	9.82418	9.79491	9.81442	10.0066	10.0175	9.8853	10.0602	10.041	10.0166	9.79955	9.87661	9.89005	9.6736	9.76735	9.77551	9.10753	9.15691	9.96824	9.96341	9.25431	9.19439	9.83742	9.81117	9.9698	10.0393	9.8554	9.73882
ENSMUSG00000002546	Golga2	7.89619	7.95623	7.91899	7.94519	8.03566	7.9859	8.78653	8.77659	8.77351	8.82159	8.81856	8.90898	8.29228	8.04291	8.02263	8.18376	8.07343	8.14489	8.37742	8.46899	8.50119	8.44587	8.33623	8.4628	8.75599	8.5341	8.53182	8.61484	8.60354	8.55066	8.45527	8.43705	8.4132	8.32693	8.47308	8.45481	7.9238	7.98892	8.77888	8.84971	8.11927	8.13403	8.4492	8.41496	8.60731	8.58968	8.43517	8.41827
ENSMUSG00000002550	Uck1	3.92827	4.05242	3.91431	3.91559	3.9826	3.98907	4.96286	4.97878	4.96643	4.98757	4.98491	5.02578	4.13207	4.38445	4.20103	4.34023	4.22087	4.31446	4.14965	4.14925	4.22655	4.19714	4.17192	4.1162	4.60665	4.70855	4.66123	4.74739	4.63817	4.6927	4.22908	4.22691	4.25936	4.14129	4.23618	4.30405	3.965	3.96242	4.96936	4.99942	4.23918	4.29185	4.17515	4.16175	4.65881	4.69275	4.23845	4.22718
ENSMUSG00000002565	Scin	NA	NA	NA	NA	NA	NA	NA	NA	NA	NA	NA	NA	NA	NA	NA	NA	NA	NA	NA	NA	NA	NA	NA	NA	1.90719	1.87326	1.94381	1.95955	1.94394	1.86442	NA	NA	NA	NA	NA	NA	NA	NA	NA	NA	NA	NA	NA	NA	1.90809	1.92264	NA	NA
ENSMUSG00000002578	Ikzf4	3.10267	3.17468	3.10401	3.13538	3.19652	3.08135	4.06539	3.96985	4.05399	3.94818	4.01648	4.01275	3.65813	3.72639	3.4701	3.76115	3.72473	3.6328	3.08606	3.13048	3.05965	3.07184	3.11344	3.11736	3.60803	3.63762	3.72466	3.76313	3.68289	3.74905	3.15782	3.1952	3.25977	3.1807	3.16403	3.25976	3.12712	3.13775	4.02974	3.99247	3.61821	3.70623	3.09206	3.10088	3.65677	3.73169	3.20427	3.2015
ENSMUSG00000002580	Mien1	7.13591	7.352	7.45242	7.42004	7.36753	7.33103	8.2278	8.19904	8.25177	8.23092	8.26656	8.28551	7.8976	7.69049	7.68362	7.9485	7.92135	7.85483	8.0629	8.09265	7.95243	8.09321	7.9952	8.1016	8.23734	8.30722	8.21468	8.23253	8.22019	8.16315	7.48063	7.64791	7.53364	7.41437	7.5259	7.45475	7.31344	7.37286	8.2262	8.261	7.75724	7.90823	8.03599	8.06334	8.25308	8.20529	7.55406	7.46501
ENSMUSG00000002602	Axl	2.54888	2.5452	2.64891	2.51567	2.63596	2.60356	4.1374	4.19012	4.08959	4.05507	4.12136	4.07861	4.05502	4.34624	4.10148	4.04336	4.09882	3.99668	3.43548	3.43975	3.40581	3.39658	3.47433	3.43101	3.60613	3.78459	3.70213	3.7826	3.65875	3.76836	3.89606	3.86167	3.8131	3.89076	3.99576	4.0272	2.581	2.58506	4.13903	4.08501	4.16758	4.04629	3.42701	3.43397	3.69762	3.73657	3.85694	3.97124
ENSMUSG00000002603	Tgfb1	4.32164	4.35087	4.46823	4.37999	4.5617	4.39516	5.33535	5.41159	5.4377	5.46778	5.35709	5.46044	5.16727	5.3511	5.33007	5.54663	5.46544	5.37578	5.04138	5.00077	4.97909	4.9298	5.00824	5.06973	5.4303	5.63323	5.58392	5.65509	5.65185	5.69554	4.91475	5.04172	5.04966	5.23849	5.06698	5.15461	4.38025	4.44562	5.39488	5.42844	5.28281	5.46262	5.00708	5.00259	5.54915	5.66749	5.00204	5.15336
ENSMUSG00000002608	Ccdc97	6.76521	6.60565	6.65523	6.55427	6.6777	6.63037	7.27695	7.21828	7.35533	7.30045	7.25855	7.20742	6.77175	6.76568	6.82648	6.94236	6.74026	6.74811	6.82009	6.81882	7.08633	6.80999	6.88722	6.94245	7.22036	6.85592	6.90001	7.029	7.06147	7.00037	7.06581	6.91918	6.93138	6.79307	7.06477	7.0799	6.67536	6.62078	7.28352	7.25547	6.78797	6.81024	6.90841	6.87989	6.99209	7.03028	6.97212	6.97925
ENSMUSG00000002617	Zfp40	3.97643	3.99491	4.02318	4.16704	4.20376	4.17785	5.26776	5.39125	5.36327	5.2758	5.51405	5.36688	4.82976	4.79667	4.72389	4.7912	5.0419	4.77889	5.10298	5.1147	5.09521	5.19775	5.16901	5.25243	5.01607	5.11792	5.06286	5.04918	5.12391	5.11463	5.08689	5.1991	5.16177	5.18786	5.04584	5.06322	3.99818	4.18288	5.34076	5.38558	4.78344	4.87066	5.1043	5.2064	5.06562	5.0959	5.14926	5.09897
ENSMUSG00000002625	Akap8l	4.73077	4.78406	4.89363	4.81657	4.81218	4.91549	5.79418	5.8551	5.74521	5.78961	5.83826	5.79566	5.55244	6.05821	5.80141	5.92932	5.76275	5.97826	5.60456	5.62712	5.55637	5.64298	5.58359	5.49404	6.09208	5.81891	5.94475	5.9328	5.93794	6.04829	5.90292	6.00494	5.84274	5.90403	5.90106	5.96542	4.80282	4.84808	5.79817	5.80784	5.80402	5.89011	5.59602	5.57353	5.95191	5.97301	5.91686	5.9235
ENSMUSG00000002633	Shh	6.65317	6.81838	6.84757	6.4738	6.57009	6.54473	7.39971	7.6408	7.51494	7.46029	7.50249	7.51635	7.66647	8.28497	8.05158	8.21389	7.8405	7.90293	7.10243	7.19127	7.03393	7.01702	7.05913	7.05628	7.26128	7.61566	7.84124	7.4362	7.46454	7.45247	6.61505	6.8842	6.67544	6.52343	6.63286	6.6499	6.77304	6.52954	7.51848	7.49304	8.00101	7.98578	7.10921	7.04414	7.57273	7.45107	6.7249	6.60206
ENSMUSG00000002635	Pdcd2l	5.55187	5.35469	5.1808	5.29091	5.2586	5.42401	6.06737	6.03274	6.21157	5.94655	6.04779	6.04229	5.28975	5.18014	5.36152	5.35407	5.34061	5.11699	5.76415	5.74297	5.75232	5.74063	5.72238	5.85096	5.73636	5.71081	5.712	5.78719	5.77682	5.69829	5.42835	5.53149	5.44925	5.39881	5.56885	5.5856	5.36245	5.3245	6.10389	6.01221	5.27714	5.27056	5.75315	5.77132	5.71972	5.7541	5.4697	5.51775
ENSMUSG00000002658	Gtf2f1	6.89528	6.98578	6.89769	6.73687	6.80986	6.88033	7.6303	7.54919	7.51364	7.65329	7.47837	7.53936	7.1571	7.13941	7.07946	7.15916	7.07176	7.08211	7.52762	7.4404	7.59567	7.52796	7.48304	7.66764	7.61952	7.6625	7.55357	7.52736	7.60669	7.54996	7.30266	7.15194	7.3185	7.2216	7.24237	7.14966	6.92625	6.80902	7.56438	7.557	7.12532	7.10434	7.52123	7.55955	7.61186	7.56134	7.2577	7.20454
ENSMUSG00000002660	Clpp	6.4208	6.55119	6.21688	6.4254	6.60819	6.48261	7.24401	7.13823	7.2051	7.1036	7.17412	7.18395	6.7905	6.74496	6.81445	6.71704	6.57233	6.80661	6.86998	6.87338	6.92293	6.86608	6.86514	6.92206	6.68085	6.77791	6.82948	6.85784	6.98577	6.90806	6.76697	6.66189	6.74709	6.69882	6.70881	6.78702	6.39629	6.5054	7.19578	7.15389	6.7833	6.69866	6.88876	6.88443	6.76274	6.91722	6.72531	6.73155
ENSMUSG00000002661	Alkbh7	6.4043	6.40098	5.95661	6.18394	6.25638	6.16127	7.01612	6.90397	6.90867	6.91137	7.01031	7.0325	6.45955	6.31861	6.37593	6.53939	6.2871	6.57474	6.75427	6.85928	6.95087	6.70466	6.73002	6.86898	6.67809	6.62903	6.66297	6.75192	6.86338	6.7892	6.48327	6.49941	6.26716	6.32278	6.31548	6.35309	6.25396	6.20053	6.94292	6.98473	6.3847	6.46708	6.8548	6.76789	6.6567	6.8015	6.41661	6.33045
ENSMUSG00000002679	Med6	6.6193	6.46916	6.2785	6.51785	6.39183	6.4879	7.11244	6.97251	7.21847	7.13276	7.11223	7.17354	6.71251	6.39994	6.53251	6.55458	6.63126	6.53342	7.10284	7.05997	6.99222	7.05075	7.00964	7.13184	6.88439	7.01377	6.99427	7.17123	7.05272	7.04511	6.77424	6.73272	6.74405	6.71185	6.67236	6.75489	6.45565	6.46586	7.10114	7.13951	6.54832	6.57309	7.05168	7.06408	6.96414	7.08969	6.75034	6.71303
ENSMUSG00000002688	Prkd1	3.36908	3.36393	3.29697	3.33077	3.34367	3.37464	4.22163	4.33009	4.244	4.38278	4.32844	4.27309	3.7049	3.67692	3.83072	3.77334	3.88137	3.80818	3.84862	3.83647	3.82825	3.74631	3.81582	3.85629	3.90885	3.92614	3.97876	4.04118	3.95209	3.97352	4.00717	4.0387	3.99056	4.00145	4.02784	4.02032	3.34333	3.3497	4.26524	4.32811	3.73751	3.82096	3.83778	3.80614	3.93792	3.98893	4.01214	4.01653
ENSMUSG00000002699	Lcp2	NA	NA	NA	NA	NA	NA	NA	NA	NA	NA	NA	NA	1.50346	1.4326	1.4377	1.45546	1.56449	1.59667	NA	NA	NA	NA	NA	NA	NA	NA	NA	NA	NA	NA	NA	NA	NA	NA	NA	NA	NA	NA	NA	NA	1.45792	1.53888	NA	NA	NA	NA	NA	NA
ENSMUSG00000002718	Cse1l	9.68165	9.83165	10.1062	9.92275	9.79904	9.76428	10.761	10.5373	10.6274	10.8098	10.6261	10.6062	10.1574	9.81983	9.91531	9.79254	10.0237	9.92865	10.6557	10.6139	10.6521	10.6348	10.7227	10.7264	10.908	10.8722	10.7926	10.9598	11.0206	10.9291	10.3896	10.4079	10.529	10.5298	10.3597	10.4615	9.87318	9.82869	10.6419	10.6807	9.96419	9.91496	10.6406	10.6946	10.8576	10.9698	10.4422	10.4503
ENSMUSG00000002728	Naa20	6.80449	6.93433	6.84077	6.97638	7.01235	7.0126	7.36736	7.47219	7.64415	7.38273	7.55456	7.52327	7.24468	7.21373	7.16027	7.29627	7.31331	7.34399	7.27503	7.27469	7.29378	7.31543	7.33963	7.36831	7.37531	7.42016	7.37025	7.35321	7.46361	7.46854	6.77768	6.77719	6.75813	6.78557	6.69221	6.74878	6.85986	7.00044	7.49456	7.48686	7.20623	7.31786	7.28117	7.34112	7.38857	7.42845	6.771	6.74219
ENSMUSG00000002731	Prkra	7.35826	7.0591	7.02635	7.15553	6.90274	6.96556	7.89221	7.74472	7.85603	7.83919	7.83088	7.87625	7.34613	7.15655	7.12786	7.31753	7.10138	7.17012	7.53539	7.51998	7.53533	7.46152	7.52105	7.57672	7.62483	7.56103	7.5545	7.70524	7.67695	7.64453	7.31779	7.36641	7.315	7.47397	7.37126	7.11325	7.14791	7.00794	7.83098	7.84877	7.21018	7.19634	7.53023	7.51976	7.58012	7.67557	7.33307	7.31949
ENSMUSG00000002732	Fkbp7	4.64101	4.70403	4.84843	4.62046	4.75049	4.74158	5.8952	5.917	5.85776	5.86913	5.79185	5.92011	5.66739	5.85929	5.71197	5.66979	5.66204	5.53441	5.48233	5.64135	5.39384	5.67557	5.56971	5.48599	5.86598	5.96328	6.01328	5.87728	5.93543	5.88487	5.03663	5.08038	4.99751	5.10029	4.91664	4.99376	4.73116	4.70417	5.88998	5.86036	5.74622	5.62208	5.50584	5.57709	5.94751	5.89919	5.03817	5.00356
ENSMUSG00000002733	Plekha3	5.71723	5.73328	5.55796	5.65204	5.78138	5.71219	6.47188	6.62752	6.64987	6.56492	6.57644	6.77311	6.21436	6.45918	6.46568	6.57775	6.43506	6.65804	6.0972	6.07756	6.08474	6.12568	6.08284	6.05544	6.54991	6.73154	6.75684	6.69093	6.63844	6.68428	5.8737	5.9129	5.84194	5.90433	5.85702	5.80315	5.66949	5.7152	6.58309	6.63815	6.37974	6.55695	6.0865	6.08799	6.67943	6.67122	5.87618	5.85483
ENSMUSG00000002741	Ykt6	6.82193	6.68511	6.5626	6.62377	6.6378	6.66134	7.37123	7.47742	7.48013	7.6044	7.4538	7.42601	7.18236	7.10177	6.98262	7.18198	7.07254	7.05034	7.22546	7.17209	7.25488	7.14983	7.21075	7.11455	7.45915	7.42353	7.42306	7.55932	7.50106	7.52453	7.13668	7.128	7.04223	7.01188	7.0448	7.12717	6.68988	6.64097	7.44293	7.49474	7.08892	7.10162	7.21748	7.15838	7.43525	7.52831	7.1023	7.06129
ENSMUSG00000002748	Baz1b	8.03642	7.98693	7.86376	7.93288	7.87447	7.94162	8.39014	8.35227	8.49719	8.42261	8.4495	8.52549	7.9462	7.93566	7.96817	7.85552	7.9819	7.95846	8.12989	8.07165	8.40241	8.2172	8.2918	8.36376	8.4903	8.19436	8.16919	8.34912	8.29124	8.12102	8.64365	8.40167	8.45572	8.52834	8.56102	8.55439	7.96237	7.91632	8.4132	8.46587	7.95001	7.93196	8.20132	8.29092	8.28462	8.25379	8.50035	8.54791
ENSMUSG00000002763	Pex6	4.43989	4.28575	4.26517	4.22299	4.21811	4.19038	4.84873	4.72851	4.81833	4.80315	4.84164	4.81621	4.11598	4.11418	4.16797	4.16028	4.147	4.00627	4.53092	4.59433	4.69802	4.64119	4.57364	4.54593	4.13397	4.10565	4.17516	4.25877	4.12308	4.12892	4.26769	4.36087	4.29268	4.23796	4.34275	4.50274	4.33027	4.21049	4.79853	4.82034	4.13271	4.10452	4.60775	4.58692	4.13826	4.17026	4.30708	4.36115
ENSMUSG00000002767	Mrpl2	6.87658	6.77921	6.80571	6.68742	6.76133	6.4835	7.64884	7.56484	7.67254	7.65685	7.62415	7.5725	7.12708	6.9006	6.93921	6.965	6.93579	6.92017	7.3581	7.40824	7.48185	7.42033	7.36287	7.47154	7.62362	7.61543	7.476	7.4982	7.62019	7.54645	7.05048	7.01756	6.97788	7.04021	7.21118	7.0745	6.8205	6.64408	7.62874	7.61783	6.98896	6.94032	7.41607	7.41825	7.57168	7.55495	7.01531	7.10863
ENSMUSG00000002768	Mea1	7.37228	7.05613	7.11356	7.08715	7.25659	7.27977	7.80652	7.82148	8.06514	7.77697	7.83858	7.9169	7.63026	7.59668	7.74886	7.55149	7.64576	7.64028	7.78778	7.77173	7.90034	7.88573	7.78146	7.72746	7.94012	7.98845	7.92363	7.92268	7.98464	7.9446	7.4781	7.28258	7.32273	7.23998	7.32008	7.3164	7.18066	7.20784	7.89771	7.84415	7.6586	7.61251	7.81995	7.79822	7.95073	7.95064	7.36114	7.29215
ENSMUSG00000002769	Gnmt	NA	NA	NA	NA	NA	NA	3.06282	3.09438	3.07107	3.07713	3.0517	3.09461	NA	NA	NA	NA	NA	NA	2.64385	2.64282	2.65007	2.63714	2.62889	2.63809	2.92828	2.90352	2.86139	3.00156	2.89456	2.93842	2.79708	2.86006	2.83875	2.92436	2.93141	2.87603	NA	NA	3.07609	3.07448	NA	NA	2.64558	2.63471	2.89773	2.94485	2.83196	2.9106
ENSMUSG00000002771	Grin2d	5.79383	5.85739	5.51542	5.7943	5.70056	5.75526	6.82763	6.88861	6.74275	6.88529	6.84662	6.89402	6.77255	7.32448	7.15659	7.04749	7.00176	6.9717	6.54081	6.63796	6.60929	6.4973	6.55972	6.53581	7.31447	7.25813	7.45606	6.96479	7.08248	7.09165	6.40048	6.59151	6.55958	6.45417	6.42674	6.40833	5.72221	5.75004	6.81966	6.87531	7.08454	7.00698	6.59602	6.53095	7.34289	7.04631	6.51719	6.42975
ENSMUSG00000002778	Kdelr1	7.82624	8.01255	8.02748	7.81475	7.93333	8.00671	9.19073	9.18879	8.83708	9.1989	9.15924	8.99452	9.02317	9.57649	9.49795	9.42052	9.38841	9.41005	9.09491	9.17907	8.82167	8.85392	9.0921	8.90506	9.30894	9.74941	9.81157	9.46769	9.53408	9.67414	8.38389	8.66537	8.41801	8.50414	8.21377	8.23538	7.95542	7.91826	9.0722	9.11755	9.36587	9.40633	9.03188	8.95036	9.62331	9.55864	8.48909	8.31776
ENSMUSG00000002781	Tmem143	5.91194	5.76069	5.63279	5.75882	5.75982	5.68963	6.5768	6.43275	6.4397	6.41452	6.42597	6.48208	6.03999	5.88951	5.92323	5.94984	5.86344	6.0789	6.14513	6.18109	6.12995	6.05632	6.13546	6.23448	6.18767	6.25338	6.14902	6.33184	6.23808	6.28724	6.17432	5.84499	6.05812	6.04868	6.0919	6.14871	5.76848	5.73609	6.48308	6.44086	5.95091	5.96406	6.15206	6.14209	6.19669	6.28572	6.02581	6.09643
ENSMUSG00000002797	Ggct	5.2519	5.45245	5.4778	5.54122	5.36494	5.34251	6.39095	6.50702	6.56918	6.4246	6.49715	6.51388	6.10131	5.88545	5.91227	5.99123	6.05156	6.00632	6.01792	5.94828	5.97179	6.04051	6.06958	6.05393	6.61353	6.51341	6.49897	6.62738	6.50568	6.62604	5.75854	5.83632	5.80482	5.80035	5.72892	5.80874	5.39405	5.41622	6.48905	6.47854	5.96634	6.01637	5.97933	6.05467	6.54197	6.58637	5.7999	5.77934
ENSMUSG00000002799	Jag2	4.38806	4.46143	4.38658	4.34602	4.38747	4.54012	5.31859	5.41891	5.30451	5.34962	5.31089	5.31081	5.5274	6.0783	5.78289	5.83076	5.74022	5.79402	4.86666	4.89118	4.96383	4.82162	4.89959	4.81512	5.56067	5.81707	5.85217	5.61815	5.71578	5.66297	4.59811	4.75394	4.64973	4.64318	4.58109	4.59295	4.41203	4.42453	5.34734	5.32377	5.7962	5.78833	4.90722	4.84544	5.7433	5.66564	4.66726	4.60574
ENSMUSG00000002803	Btbd6	5.39774	5.20176	5.08244	5.27476	5.30387	5.31578	6.02686	5.94267	5.94393	5.98507	6.0014	5.9718	5.49848	5.19954	5.51173	5.39738	5.21955	5.31629	5.74709	5.60522	5.83544	5.76459	5.70969	5.61875	5.91267	5.67037	5.59271	5.7185	5.71517	5.76055	5.28497	5.25821	5.29617	5.3211	5.50494	5.50796	5.22731	5.29813	5.97115	5.98609	5.40325	5.31107	5.72925	5.69767	5.72525	5.7314	5.27978	5.44467
ENSMUSG00000002804	Nudt14	4.69956	4.72142	4.40746	4.62386	4.79219	4.64471	5.14006	5.07874	5.17484	5.14646	5.25186	5.20217	4.79051	4.7692	4.78011	4.75101	4.61411	4.90777	5.0087	4.97443	4.93248	4.93416	4.93842	5.00163	4.9111	5.02288	5.05771	5.05419	5.06815	4.82667	4.96357	4.87443	5.00798	4.93426	5.00826	5.07536	4.60948	4.68692	5.13121	5.20016	4.77994	4.75763	4.97187	4.95807	4.99723	4.983	4.94866	5.00596
ENSMUSG00000002808	Epdr1	9.87494	10.1809	10.2334	10.2335	10.0767	10.1154	11.3199	11.3813	11.1104	11.3162	11.3609	11.2594	11.1691	11.3155	11.1535	11.125	11.2825	11.1267	10.8212	10.9159	10.5508	10.8217	10.7213	10.7943	10.9385	11.0319	11.1036	10.9282	11.0569	10.7685	10.1201	10.0493	10.1226	10.2256	10.1384	10.151	10.0964	10.1419	11.2705	11.3122	11.2127	11.178	10.7626	10.7791	11.0247	10.9178	10.0973	10.1717
ENSMUSG00000002812	Flii	7.75189	7.64404	7.42837	7.38191	7.43198	7.33853	8.24237	8.01307	8.19274	8.11939	8.13931	8.0317	7.70905	7.62685	7.54188	7.52795	7.66773	7.45287	8.15498	8.13026	8.25686	8.03364	8.07358	8.25276	8.37688	8.17509	8.16592	8.20307	8.29275	8.12501	8.10029	8.07323	8.13045	8.11552	8.15161	8.22846	7.6081	7.38414	8.14939	8.0968	7.62593	7.54951	8.1807	8.12	8.2393	8.20694	8.10132	8.16519
ENSMUSG00000002814	Top3a	3.59837	3.72671	3.58573	3.7166	3.6858	3.70547	4.20447	4.20287	4.21926	4.21004	4.18922	4.21813	3.55391	3.31946	3.31171	3.29077	3.34305	3.3505	4.1544	4.1696	4.21465	4.13869	4.15378	4.27299	4.36166	4.07184	4.09137	4.39123	4.12022	4.17863	3.86444	3.82909	3.89517	3.89475	3.89912	3.96674	3.63693	3.70262	4.20887	4.2058	3.39503	3.3281	4.17955	4.18849	4.17496	4.23003	3.8629	3.92021
ENSMUSG00000002820	Atg4d	4.85538	4.78168	4.7572	4.71648	4.8508	4.85852	5.47701	5.40548	5.47519	5.29786	5.46086	5.44047	5.0383	5.03223	5.16802	5.16434	4.98998	5.11232	5.35068	5.31785	5.43932	5.19774	5.34788	5.20152	5.30973	5.28723	5.15449	5.13025	5.20588	5.24732	4.67152	4.66345	4.72096	4.70553	4.71501	4.80608	4.79809	4.8086	5.45256	5.39973	5.07952	5.08888	5.36928	5.24905	5.25049	5.19448	4.68531	4.74221
ENSMUSG00000002825	Qtrt1	3.82712	3.69168	3.56149	3.68664	3.67082	3.80705	4.31629	4.39864	4.35799	4.33247	4.36661	4.48245	3.75457	3.79585	3.74379	3.71543	3.75329	3.73145	4.08133	4.20299	4.27262	4.16302	4.14001	4.19681	4.00521	3.86287	3.87647	3.98181	3.77345	3.84095	3.86954	3.8876	3.87633	3.89875	3.8226	3.86458	3.69343	3.72151	4.35764	4.39384	3.76474	3.73339	4.18565	4.16661	3.91485	3.8654	3.87782	3.86198
ENSMUSG00000002831	Plin4	NA	NA	NA	NA	NA	NA	NA	NA	NA	NA	NA	NA	NA	NA	NA	NA	NA	NA	NA	NA	NA	NA	NA	NA	NA	NA	NA	NA	NA	NA	2.26338	2.25203	2.2963	2.35561	2.40126	2.35357	NA	NA	NA	NA	NA	NA	NA	NA	NA	NA	2.27057	2.37015
ENSMUSG00000002833	Hdgfl2	7.31361	7.33087	7.13613	7.02494	7.02308	7.07543	7.65969	7.51361	7.77145	7.58076	7.59011	7.61997	7.26337	7.14634	7.06922	7.20169	7.05972	6.93816	7.43768	7.46733	7.64129	7.42978	7.41904	7.64932	7.5663	7.30547	7.28589	7.32287	7.46559	7.28811	7.33629	7.20503	7.28332	7.06847	7.29606	7.39324	7.2602	7.04115	7.64825	7.59694	7.15964	7.06653	7.51544	7.49938	7.38589	7.35886	7.27488	7.25259
ENSMUSG00000002835	Chaf1a	3.34693	3.14968	3.20175	3.21599	3.14601	3.21327	3.64001	3.6737	3.6095	3.61274	3.64809	3.63926	2.93683	2.88819	2.84325	2.75207	2.79745	3.03854	3.35763	3.28539	3.35903	3.35236	3.30702	3.35405	3.34625	3.35751	3.33369	3.42188	3.49388	3.31508	3.49702	3.47104	3.46519	3.44258	3.59113	3.56558	3.23279	3.19176	3.64107	3.63336	2.88942	2.86269	3.33401	3.33781	3.34582	3.41028	3.47775	3.53309
ENSMUSG00000002844	Adprh	9.01915	8.93806	8.75991	8.78883	8.7486	8.99012	9.78487	9.84027	9.86996	9.76602	9.81262	9.84966	9.44322	9.52298	9.40964	9.47017	9.51555	9.43442	9.4202	9.51443	9.35103	9.5563	9.38987	9.5181	9.66055	9.49922	9.59241	9.50601	9.59445	9.37857	9.07408	8.95194	8.9962	9.05667	9.00433	9.1396	8.90571	8.84252	9.8317	9.80943	9.45861	9.47338	9.42855	9.48809	9.58406	9.49301	9.00741	9.06687
ENSMUSG00000002845	Tmem39a	2.90859	2.90606	3.05891	2.98566	3.01604	3.12468	3.9278	3.9427	3.94998	3.91502	3.95815	3.97894	4.15251	4.29634	4.35753	4.2514	4.10443	4.16295	3.44929	3.36437	3.37287	3.3751	3.40376	3.40967	3.62732	3.64886	3.69502	3.67927	3.62443	3.58327	3.33047	3.39668	3.19926	3.30087	3.47461	3.3954	2.95786	3.04213	3.94016	3.9507	4.26879	4.17293	3.39551	3.39617	3.65707	3.62899	3.3088	3.39029
ENSMUSG00000002846	Timmdc1	6.67059	6.43565	6.45753	6.58741	6.53133	6.58295	7.14202	7.18467	7.33923	7.23092	7.23663	7.32391	6.71031	6.77495	6.6955	6.85689	6.74946	6.88869	7.05218	7.02173	7.11663	7.03518	7.0144	6.95608	7.41071	7.27212	7.12165	7.19666	7.22762	7.33292	6.41491	6.49065	6.49569	6.45467	6.43927	6.42858	6.52126	6.56723	7.22198	7.26382	6.72692	6.83168	7.06351	7.00189	7.26816	7.2524	6.46708	6.44084
ENSMUSG00000002870	Mcm2	3.9517	3.88605	3.80061	3.97768	3.87802	4.01618	4.14364	4.14489	4.2945	4.26661	4.23925	4.22943	3.86205	4.02587	4.07378	4.05788	4.05715	3.93835	3.6126	3.66206	3.66196	3.68005	3.649	3.59496	4.0071	3.92172	3.9161	3.99482	3.84423	3.94063	4.39795	4.38718	4.38352	4.40149	4.40277	4.38897	3.87945	3.95729	4.19434	4.2451	3.98723	4.0178	3.64554	3.64134	3.94831	3.92656	4.38955	4.39774
ENSMUSG00000002871	Tpra1	5.99069	5.97188	5.85896	5.76148	5.91442	6.04543	7.05087	6.91588	6.98703	7.01336	6.95696	6.87507	6.80003	6.95349	6.89135	6.8771	6.78699	6.85593	6.73414	6.93393	6.89196	6.77565	6.86654	6.83947	7.35537	7.14218	7.34461	7.15844	7.09136	7.18127	6.41573	6.48594	6.31565	6.33542	6.28239	6.33753	5.94051	5.90711	6.98459	6.94846	6.88162	6.84001	6.85335	6.82722	7.28072	7.14369	6.40577	6.31845
ENSMUSG00000002881	Nab1	5.90351	6.10003	6.02832	6.15398	6.03811	6.07608	6.89979	6.95796	6.83904	6.97337	6.90463	6.99588	6.7301	7.03224	7.05298	7.05437	6.88794	7.03834	6.56476	6.70525	6.60765	6.58821	6.54353	6.63713	7.07331	7.17206	7.06178	7.1205	7.11457	7.16522	6.28842	6.28582	6.33135	6.37372	6.15661	6.31723	6.01062	6.08939	6.89893	6.95796	6.93844	6.99355	6.62589	6.58962	7.10238	7.13343	6.30186	6.28252
ENSMUSG00000002885	Adgre5	NA	NA	NA	NA	NA	NA	2.79605	2.74809	2.70906	2.70253	2.76484	2.68065	3.84759	4.07282	3.79852	3.74279	3.85664	3.78909	2.83952	2.90678	2.91738	2.88515	2.93888	2.83986	3.48964	3.6573	3.69426	3.58113	3.5682	3.6788	3.47998	3.51993	3.47232	3.45081	3.51875	3.5612	NA	NA	2.75107	2.71601	3.90631	3.79618	2.88789	2.88796	3.61373	3.60938	3.49075	3.51025
ENSMUSG00000002897	Il17ra	3.1919	3.16803	3.19102	3.32314	3.22376	3.27087	4.77134	4.81222	4.60738	4.76227	4.73103	4.72713	4.56175	4.76365	4.45557	4.73248	4.64691	4.56325	4.08072	4.12129	4.12939	4.03386	4.07895	4.09947	4.77543	4.87769	4.92101	4.75535	4.78176	4.79942	4.02489	4.27641	4.11895	4.07871	4.05988	3.98569	3.18365	3.27259	4.73031	4.74014	4.59366	4.64755	4.11047	4.07076	4.85804	4.77884	4.14008	4.04143
ENSMUSG00000002900	Lamb1	8.2102	8.20338	8.24537	8.21725	8.25463	8.44956	9.24547	9.47895	9.2758	9.26065	9.33055	9.3794	9.30668	10.3745	10.0807	10.1947	9.95397	9.97291	9.00211	9.14493	9.04619	9.06599	8.98232	8.9305	9.50827	9.91061	10.089	9.65589	9.73628	10.0023	8.47721	9.11378	8.52053	8.56294	8.59933	8.34461	8.21965	8.30714	9.33341	9.32353	9.92064	10.0405	9.06441	8.99294	9.83595	9.79814	8.70384	8.50229
ENSMUSG00000002908	Kcnn1	3.99354	3.97865	3.80933	3.856	4.02119	3.92125	4.77958	4.8478	4.93977	4.7628	4.89996	4.80559	4.47533	4.50264	4.41773	4.63541	4.48272	4.2812	4.53148	4.46537	4.45058	4.54718	4.45944	4.48304	4.5929	4.70102	4.64268	4.59367	4.53638	4.4843	4.06361	4.12055	4.00069	4.00002	3.9699	4.00256	3.92717	3.93281	4.85572	4.82279	4.46524	4.46644	4.48247	4.49655	4.64553	4.53812	4.06162	3.99083
ENSMUSG00000002910	Arrdc2	1.59501	1.56877	1.66417	1.5949	1.70263	1.66461	1.97211	1.89537	1.94521	1.93516	1.97332	1.94211	NA	NA	NA	NA	NA	NA	2.25479	2.25471	2.2879	2.22946	2.25773	2.31351	2.08515	2.16375	2.13371	2.2148	2.16738	2.14767	NA	NA	NA	NA	NA	NA	1.60932	1.65405	1.93756	1.9502	NA	NA	2.2658	2.2669	2.12754	2.17662	NA	NA
ENSMUSG00000002930	Ppp1r17	11.1658	11.3697	11.6919	11.2551	11.2826	11.1201	11.9891	11.8767	12.042	11.9961	11.9241	12.1796	11.3632	11.3694	11.2914	11.7163	11.3683	11.4348	11.8394	11.9338	11.7896	11.7246	11.8096	11.917	11.331	11.8104	11.8515	11.9272	12.205	12.0137	11.2014	11.2842	11.3368	11.1468	11.1084	11.0495	11.4091	11.2193	11.9693	12.0333	11.3413	11.5065	11.8543	11.817	11.6643	12.0486	11.2741	11.1016
ENSMUSG00000002944	Cd36	2.43441	2.49343	2.51083	2.46891	2.47737	2.3939	3.60971	3.67714	3.59744	3.60933	3.61117	3.64082	3.55982	3.79911	3.49653	3.55327	3.70597	3.5641	3.61196	3.58213	3.50305	3.55317	3.62021	3.51092	3.85436	3.99312	4.17142	3.86552	4.14839	3.96873	3.01029	3.08815	2.95959	3.1081	3.05436	3.03649	2.47955	2.44673	3.6281	3.62044	3.61848	3.60778	3.56571	3.56143	4.0063	3.99422	3.01935	3.06632
ENSMUSG00000002949	Timm44	6.64914	7.03731	6.87824	6.99601	6.86916	7.00065	7.30872	7.47788	7.55667	7.41811	7.53532	7.41543	7.1854	7.08471	7.2177	7.36458	7.29076	7.10328	7.14569	7.16823	7.30995	7.18312	7.19025	7.17812	7.24534	7.2043	7.13082	7.20743	7.20222	7.19357	6.88331	6.8222	6.85558	6.75334	6.78369	6.72696	6.8549	6.95527	7.44776	7.45629	7.1626	7.25287	7.20796	7.18383	7.19349	7.20107	6.8537	6.75466
ENSMUSG00000002957	Ap2a2	10.5463	10.4726	10.5178	10.4215	10.3265	10.3398	11.2187	10.8342	11.0227	11.1628	10.9699	10.966	10.6144	10.3246	10.2508	10.2186	10.3329	10.3228	11.0629	11.0146	11.072	10.9651	10.9789	11.0718	11.1369	11.037	10.8836	11.1331	11.1741	11.0342	10.5424	10.443	10.4936	10.5493	10.5465	10.504	10.5122	10.3626	11.0252	11.0329	10.3966	10.2914	11.0498	11.0053	11.0192	11.1138	10.493	10.5333
ENSMUSG00000002963	Pnkp	4.50935	4.3951	4.37734	4.59041	4.50892	4.56081	5.07831	5.12691	5.13599	5.13868	5.05704	5.10766	4.61094	4.57405	4.66059	4.6254	4.78906	4.60188	5.19772	5.16215	5.25576	5.15669	5.16206	5.14276	5.16646	4.79763	4.98464	5.05481	5.10859	5.08014	4.68394	4.56238	4.55219	4.71561	4.7139	4.75333	4.42726	4.55338	5.11374	5.10113	4.61519	4.67211	5.20521	5.15384	4.98291	5.08118	4.5995	4.72761
ENSMUSG00000002968	Med25	5.96895	5.78996	5.68633	5.72807	5.9258	5.89915	6.72649	6.61255	6.59498	6.72905	6.66819	6.61384	6.17613	5.96628	6.14254	6.08872	6.09015	6.06516	6.59976	6.45565	6.49133	6.3633	6.34734	6.40327	6.28211	6.5632	6.57974	6.53648	6.4974	6.48314	6.17924	6.1808	6.17364	6.10042	6.10289	6.24102	5.81508	5.85101	6.64467	6.67036	6.09498	6.08134	6.51558	6.3713	6.47502	6.50567	6.1779	6.14811
ENSMUSG00000002980	Bcam	3.20299	3.18348	3.11536	3.19703	3.25806	3.26391	4.23864	4.30245	4.26285	4.22918	4.21578	4.28809	4.28996	4.61417	4.49242	4.41577	4.28328	4.4593	3.68549	3.75813	3.71269	3.7119	3.73698	3.67026	4.53512	4.66537	4.65549	4.47576	4.5648	4.49734	3.43039	3.39167	3.36305	3.38897	3.49001	3.44263	3.16728	3.23967	4.26798	4.24435	4.46552	4.38612	3.71877	3.70638	4.61866	4.51263	3.39504	3.44054
ENSMUSG00000002981	Clptm1	9.88216	9.93607	9.95212	9.90108	10.0939	10.1323	11.0555	11.3106	11.0172	11.1029	11.1337	11.0706	11.0159	11.7965	11.6481	11.5555	11.4873	11.4884	10.9343	10.9819	10.8484	10.9978	10.8932	10.76	11.4712	11.7748	11.8854	11.4376	11.4502	11.6908	10.5132	10.8463	10.6076	10.5945	10.4159	10.4456	9.92345	10.0424	11.1278	11.1024	11.4868	11.5104	10.9215	10.8837	11.7105	11.5262	10.6557	10.4853
ENSMUSG00000002983	Relb	NA	NA	NA	NA	NA	NA	2.0938	2.09016	2.06568	2.07675	2.09557	2.06103	2.4652	2.53069	2.45466	2.43675	2.4824	2.58239	1.90081	1.886	1.91579	1.88662	1.89043	1.92329	2.18663	2.26461	2.2836	2.2827	2.31594	2.21755	NA	NA	NA	NA	NA	NA	NA	NA	2.08322	2.07778	2.48351	2.50051	1.90087	1.90011	2.24495	2.27206	NA	NA
ENSMUSG00000002984	Tomm40	8.20053	7.85476	7.6375	7.56543	7.72894	7.73661	8.44844	8.24717	8.39565	8.52191	8.3748	8.43336	7.79958	7.63106	7.62845	7.72358	7.72693	7.6151	8.25253	8.17502	8.37315	8.16666	8.10806	8.148	8.44837	8.20479	8.31927	8.33555	8.29263	8.38594	8.06764	7.9301	8.04031	7.89977	8.01035	8.02813	7.8976	7.67699	8.36375	8.44336	7.68636	7.68854	8.2669	8.14091	8.32415	8.33804	8.01268	7.97942
ENSMUSG00000002985	Apoe	9.46711	9.04914	8.96781	9.00157	9.08898	9.16396	10.0536	9.99716	10.0062	9.98301	10.0256	9.96175	9.83612	9.89687	9.37284	9.63361	9.77786	9.59394	9.42866	9.05693	9.24936	9.23489	9.12713	9.32308	9.35008	9.07332	9.24237	9.20789	9.23441	8.75159	9.4479	9.05734	9.57458	9.78278	10.3287	10.0738	9.16136	9.08484	10.019	9.99012	9.70194	9.66847	9.24498	9.22836	9.22192	9.06463	9.35994	10.0618
ENSMUSG00000002996	Hbp1	5.10981	5.07193	5.18444	5.29855	5.20912	5.25601	6.06784	6.00025	6.04734	6.02408	5.90905	5.98276	5.36334	5.23275	5.26043	5.28566	5.18384	5.49435	5.69305	5.69881	5.6606	5.6752	5.7205	5.92195	5.73498	5.61355	5.65752	5.68654	5.69139	5.69567	5.69395	5.68689	5.64558	5.73524	5.74023	5.53759	5.12206	5.25456	6.03848	5.97196	5.28551	5.32128	5.68415	5.77255	5.66868	5.6912	5.67547	5.67102
ENSMUSG00000002997	Prkar2b	7.30148	7.21825	7.03333	7.11626	6.95568	7.14456	7.70488	7.70009	7.90037	7.79073	7.87274	7.91476	7.47359	7.43262	7.29391	7.53855	7.25029	7.38935	7.64265	7.64374	7.61175	7.70871	7.58551	7.61077	7.74881	7.48943	7.51726	7.58491	7.59199	7.64128	7.1766	7.24062	7.17513	7.17418	7.18341	7.14733	7.18435	7.07217	7.76845	7.85941	7.40004	7.39273	7.63271	7.635	7.58517	7.60606	7.19745	7.16831
ENSMUSG00000003031	Cdkn1b	8.32123	8.06031	8.31029	8.13543	8.1786	8.16551	9.05975	8.96332	9.00846	9.04869	8.94406	8.97461	8.63558	8.53542	8.74022	8.47681	8.59989	8.67948	8.60815	8.51714	8.71819	8.60926	8.66304	8.67101	8.4728	8.61076	8.6948	8.83126	8.61774	8.73214	8.30978	8.41077	8.32703	8.13109	8.37271	8.3856	8.23061	8.15985	9.01051	8.98912	8.63707	8.58539	8.61449	8.64777	8.59278	8.72705	8.3492	8.29647
ENSMUSG00000003033	Ap1m1	6.82559	7.02962	6.65677	6.78792	6.93055	6.90344	7.74754	7.79473	7.84769	7.76582	7.85968	7.74905	7.15676	7.04868	6.9832	7.0491	7.20609	7.13398	7.41345	7.24223	7.49884	7.30003	7.33418	7.37605	7.37255	7.11025	7.33302	7.50469	7.29987	7.3165	7.40204	7.42988	7.33104	7.39718	7.60401	7.53893	6.83733	6.87397	7.79665	7.79152	7.06288	7.12972	7.38484	7.33675	7.27194	7.37368	7.38765	7.51337
ENSMUSG00000003037	Rab8a	6.91462	6.67211	6.84822	6.79918	6.80711	7.05136	7.56917	7.59759	7.63252	7.4659	7.60692	7.57477	7.01078	6.95491	6.9324	7.05775	7.07221	7.22657	7.42875	7.35933	7.37963	7.43233	7.36567	7.36131	7.5004	7.43821	7.51855	7.65585	7.59854	7.63515	6.89862	6.95257	6.86387	6.87419	6.83484	6.89259	6.81165	6.88589	7.59976	7.5492	6.96603	7.11884	7.38924	7.38644	7.48572	7.62984	6.90502	6.86721
ENSMUSG00000003038	Hmgn2	NA	NA	NA	NA	NA	NA	2.56113	2.50757	2.49922	2.50358	2.52259	2.49873	NA	NA	NA	NA	NA	NA	2.06171	2.07301	2.10384	2.11803	2.06091	2.0466	2.23188	2.32673	2.27094	2.31944	2.23684	2.29633	2.05968	1.99591	2.03623	2.00436	2.01576	2.01932	NA	NA	2.52264	2.5083	NA	NA	2.07952	2.07518	2.27651	2.2842	2.03061	2.01315
ENSMUSG00000003039	Fam32a	6.51921	6.43244	6.6203	6.33638	6.29646	6.4077	7.09915	7.41414	7.24842	7.21901	7.35601	7.31542	6.89845	7.14913	7.04108	6.98492	7.10153	6.99228	6.72644	6.78598	7.0498	6.93744	6.85693	6.85173	7.37787	7.5296	7.54803	7.40578	7.38683	7.5108	6.51449	6.69349	6.64453	6.42795	6.39437	6.47276	6.52398	6.34685	7.2539	7.29681	7.02955	7.02624	6.85407	6.88203	7.48517	7.43447	6.6175	6.43169
ENSMUSG00000003062	Stard3nl	6.41471	6.25288	6.29764	6.16772	6.19495	6.30072	7.30326	7.30054	7.2193	7.25456	7.25736	7.17674	7.04682	7.35963	7.23573	7.0834	7.1994	7.15073	7.09932	7.1035	6.92608	7.04121	6.99974	6.98934	7.58345	7.50257	7.69869	7.37863	7.32243	7.56169	6.45934	6.66068	6.47973	6.6101	6.45323	6.56606	6.32174	6.22113	7.27437	7.22955	7.21406	7.14451	7.04297	7.0101	7.5949	7.42092	6.53325	6.54313
ENSMUSG00000003068	Stk11	5.98124	6.00906	5.81149	5.91323	6.12435	5.98742	6.82631	6.83238	6.95342	6.70858	6.91198	6.96058	6.55527	6.52894	6.55241	6.45141	6.40099	6.46555	6.22844	6.28547	6.32379	6.24227	6.40156	6.36699	6.69523	6.65277	6.60629	6.76075	6.41885	6.70723	6.06576	6.11626	6.12907	5.90585	6.11376	6.0547	5.93393	6.00834	6.8707	6.86038	6.54554	6.43932	6.27923	6.33694	6.65143	6.62895	6.1037	6.02477
ENSMUSG00000003070	Efna2	NA	NA	NA	NA	NA	NA	2.831	2.9071	2.83245	2.848	2.8312	2.85047	3.34082	3.46854	3.36133	3.191	3.32595	3.36137	2.48766	2.47567	2.45786	2.43799	2.45469	2.42692	2.66937	2.68746	2.67321	2.63943	2.57215	2.61592	2.24605	2.21203	2.2344	2.21763	2.21517	2.17455	NA	NA	2.85685	2.84322	3.39023	3.29278	2.47373	2.43987	2.67668	2.60917	2.23083	2.20245
ENSMUSG00000003072	Atp5d	10.4548	9.95187	9.53656	9.74483	9.80199	10.0251	10.6361	10.5112	10.7201	10.5312	10.5843	10.5879	10.0808	9.96746	9.99026	10.161	10.0722	10.1197	10.2287	10.3052	10.6134	10.4225	10.234	10.3532	10.5302	10.1676	10.153	10.343	10.3251	10.2909	10.0943	9.86683	9.85056	9.90424	10.1886	10.0287	9.98108	9.85732	10.6225	10.5678	10.0129	10.1176	10.3824	10.3366	10.2836	10.3197	9.93723	10.0405
ENSMUSG00000003099	Ppp5c	8.95398	9.02714	9.11816	9.07546	9.09462	9.12902	9.78499	9.77306	9.81466	9.72891	9.74655	9.71194	9.29078	9.11817	9.08638	9.16416	9.14337	9.20593	9.44457	9.39307	9.464	9.52244	9.42367	9.38454	9.70976	9.66207	9.66299	9.61306	9.54739	9.63612	9.24871	9.1807	9.28579	9.05909	9.24501	9.18567	9.03309	9.0997	9.7909	9.72913	9.16511	9.17115	9.43388	9.44355	9.67827	9.59886	9.2384	9.16326
ENSMUSG00000003119	Cdk12	6.76252	6.86513	6.97066	6.96042	7.0163	6.92316	7.7946	7.81422	7.81788	7.87124	7.84814	7.83334	7.34002	7.09985	7.07789	7.08371	7.29978	7.17777	7.66516	7.63246	7.66747	7.63033	7.57656	7.5779	7.87855	7.95541	7.79715	7.83982	7.9178	7.87155	7.28774	7.31697	7.38627	7.2797	7.21903	7.3194	6.8661	6.96662	7.8089	7.85091	7.17259	7.18709	7.65503	7.59493	7.87704	7.87639	7.33033	7.27271
ENSMUSG00000003123	Lipe	3.87386	4.0165	3.7618	3.88718	3.9501	3.92586	4.71739	4.62809	4.76152	4.66729	4.6477	4.82237	3.85964	3.71904	3.81323	3.8144	3.88233	3.90039	4.11888	4.11964	4.10152	4.02409	4.09683	4.16185	4.45377	4.2203	4.21039	4.35175	4.42639	4.221	3.99944	3.99039	4.09292	4.06421	4.14186	4.07464	3.88405	3.92105	4.70233	4.71245	3.79731	3.86571	4.11335	4.09425	4.29482	4.33305	4.02758	4.09357
ENSMUSG00000003131	Pafah1b2	9.66625	9.77765	9.73523	9.83295	9.79973	9.69409	10.564	10.4242	10.4489	10.5131	10.4609	10.4517	10.1854	10.2036	10.2571	10.2134	10.2232	10.18	10.3075	10.2845	10.2968	10.2344	10.315	10.3027	10.4821	10.508	10.447	10.4854	10.43	10.5687	10.0692	10.1413	10.1472	10.0865	10.1348	10.1651	9.72637	9.77559	10.479	10.4752	10.2154	10.2055	10.2963	10.284	10.479	10.4947	10.1192	10.1288
ENSMUSG00000003134	Tbc1d8	4.50392	4.26507	4.18516	4.39395	4.36598	4.36981	5.17075	5.35515	5.43193	5.29311	5.46337	5.45047	4.9394	4.91744	4.68548	4.7675	4.76663	4.7871	5.01631	5.00714	5.08738	4.97036	4.96531	5.07435	4.72277	4.74128	4.81492	4.87448	4.73718	4.75732	4.59569	4.68824	4.6501	4.66265	4.65222	4.71441	4.31805	4.37658	5.31928	5.40232	4.84744	4.77374	5.03694	5.00334	4.75966	4.78966	4.64468	4.67643
ENSMUSG00000003135	Cnot11	6.96573	6.999	7.07148	7.12885	6.92239	6.84799	7.80353	7.52929	7.66406	7.75994	7.7018	7.63533	7.26991	7.07605	7.1949	7.08445	7.21377	7.05778	7.51887	7.40335	7.43147	7.49309	7.51609	7.47034	7.58709	7.43044	7.44917	7.61731	7.48531	7.45755	7.26714	7.24516	7.30189	7.40465	7.26823	7.49615	7.01207	6.96641	7.66562	7.69902	7.18029	7.11867	7.45123	7.49317	7.4889	7.52006	7.2714	7.38968
ENSMUSG00000003153	Slc2a3	9.33709	9.2645	9.28856	9.29904	9.354	9.52187	10.41	10.5693	10.4203	10.4199	10.4166	10.3457	10.3153	11.0199	10.8941	10.818	10.8255	10.7278	10.0605	10.199	9.97041	10.1253	9.97637	9.91085	10.4882	10.5615	10.8079	10.4081	10.3553	10.3594	9.57311	9.83094	9.65807	9.61576	9.53127	9.61898	9.29672	9.39164	10.4665	10.3941	10.7431	10.7904	10.0766	10.0042	10.6192	10.3742	9.68737	9.58867
ENSMUSG00000003154	Foxj2	6.56032	6.60777	6.64738	6.4028	6.59143	6.53202	7.23657	7.04644	7.3673	7.34236	7.18476	7.17184	6.52073	6.44975	6.33924	6.2907	6.34949	6.37498	6.71903	6.88844	6.87836	6.69082	6.76346	6.91373	6.88783	6.81025	6.79124	6.77074	6.80703	6.72256	6.47414	6.32189	6.42662	6.38087	6.60924	6.59465	6.60516	6.50875	7.21677	7.23299	6.43657	6.33839	6.82861	6.78934	6.82977	6.76678	6.40755	6.52825
ENSMUSG00000003161	Sri	8.05187	7.6797	7.7701	7.63888	7.70381	7.77557	8.36381	8.23471	8.36613	8.36324	8.31756	8.34888	7.96041	7.96549	8.02153	7.86123	7.99872	7.97346	8.18973	7.98873	8.26374	8.21157	8.11592	8.07496	8.24662	8.29155	8.24203	8.30534	8.13456	8.22064	7.56753	7.81098	7.81842	7.74813	7.74514	7.57778	7.83389	7.70609	8.32155	8.34323	7.98248	7.94447	8.1474	8.13415	8.26007	8.22018	7.73231	7.69035
ENSMUSG00000003184	Irf3	5.31946	5.20065	5.19178	5.24962	5.18964	5.19236	5.62881	5.47824	5.61387	5.67557	5.57464	5.57483	4.83651	4.73097	4.88004	4.88469	4.81313	4.70239	5.27679	5.21366	5.41891	5.2697	5.30444	5.30031	5.33039	5.07796	5.24304	5.18147	5.19543	5.13507	5.02194	4.94576	4.89046	4.90614	4.95242	4.93026	5.2373	5.21054	5.57364	5.60835	4.81584	4.80007	5.30312	5.29148	5.21713	5.17066	4.95272	4.92961
ENSMUSG00000003198	Zfp959	3.53614	3.43581	3.45336	3.58062	3.49467	3.45519	4.43371	4.37166	4.36359	4.43133	4.39015	4.37386	3.928	3.68994	3.73908	3.71697	4.02534	3.81509	4.33929	4.3065	4.37673	4.37389	4.31512	4.2958	4.502	4.47765	4.50341	4.50073	4.57378	4.45959	3.74095	3.73054	3.81616	3.72415	3.89544	3.68236	3.4751	3.51016	4.38965	4.39845	3.78567	3.85247	4.34084	4.32827	4.49435	4.51137	3.76255	3.76732
ENSMUSG00000003199	Mpnd	6.25735	6.09398	6.12579	6.45638	6.61941	6.54084	6.98853	7.29246	7.1963	6.9923	7.35466	7.32593	6.95686	6.79471	6.84196	6.79139	6.83325	6.96285	6.45608	6.29745	6.34139	6.42033	6.40092	6.29859	6.45653	6.40945	6.59033	6.45798	6.4158	6.4478	6.29021	6.18074	6.19955	6.27401	6.55688	6.26904	6.15904	6.53888	7.1591	7.22429	6.86451	6.8625	6.36497	6.37328	6.48544	6.44052	6.2235	6.36664
ENSMUSG00000003200	Sh3gl1	6.78614	6.27	6.48278	6.22344	6.25451	6.27235	6.70243	6.66506	6.79736	6.74745	6.83511	6.61498	6.32061	6.21392	6.14931	6.10707	6.10497	6.26165	6.37406	6.45146	6.53215	6.41347	6.44133	6.3752	6.42144	6.4391	6.26597	6.43575	6.40655	6.28724	6.37619	6.09798	6.16682	6.08197	6.234	6.19284	6.51297	6.2501	6.72162	6.73251	6.22795	6.1579	6.45256	6.41	6.3755	6.37651	6.21366	6.1696
ENSMUSG00000003208	Yju2	3.97441	3.91966	3.87873	4.09817	3.97844	4.0278	4.90499	4.81942	4.88599	4.85224	4.95064	4.85109	4.30471	4.17194	4.3088	4.30831	4.17625	4.28748	4.51528	4.29811	4.35416	4.46707	4.38705	4.36146	4.79999	4.87887	4.80029	4.69383	4.76718	4.76428	4.42935	4.51014	4.42558	4.41126	4.48594	4.40529	3.92427	4.03481	4.87013	4.88466	4.26182	4.25735	4.38918	4.40519	4.82638	4.74176	4.45502	4.43416
ENSMUSG00000003226	Ranbp2	8.55071	8.63467	8.86083	8.77739	8.69459	8.63225	9.70201	9.75204	9.64205	9.75627	9.74767	9.60898	9.25745	9.34149	9.28091	9.22849	9.45888	9.234	9.43558	9.42221	9.48488	9.51431	9.57279	9.4552	9.80572	9.83781	9.83774	9.84243	9.85374	9.88797	9.94832	10.0737	9.98085	10.0746	9.90444	9.93825	8.68207	8.70141	9.6987	9.7043	9.29328	9.30713	9.44756	9.5141	9.82709	9.86138	10.001	9.97244
ENSMUSG00000003228	Grk5	4.30454	4.54347	4.71002	4.53063	4.58345	4.58941	5.39535	5.39756	5.48365	5.34313	5.46447	5.41028	5.16251	5.19728	5.17818	5.10965	5.44408	5.40107	5.19252	5.18597	5.31454	5.21666	5.20142	5.1491	5.32381	5.6078	5.54173	5.5546	5.56775	5.45067	4.4798	4.65237	4.56481	4.63652	4.65529	4.62976	4.51934	4.56783	5.42552	5.40596	5.17932	5.31827	5.23101	5.18906	5.49111	5.52434	4.56566	4.64053
ENSMUSG00000003233	Dvl3	7.72613	7.70679	7.33403	7.57868	7.66685	7.62259	8.09685	8.02452	8.29155	8.1672	8.21825	8.22661	7.61748	7.83337	7.92427	8.16512	7.96085	7.87719	7.77698	7.84918	7.97595	7.81855	7.85251	7.89132	7.96933	7.93657	7.90289	7.97009	7.89294	7.94394	7.81421	7.86802	7.82663	7.61705	7.83161	7.85843	7.58898	7.62271	8.13764	8.20402	7.79171	8.00106	7.86737	7.85413	7.93626	7.93566	7.83629	7.76903
ENSMUSG00000003234	Abcf3	7.60305	7.65822	7.58456	7.54085	7.55003	7.63078	8.13385	8.12118	8.30286	8.17731	8.21923	8.2299	7.80009	7.78458	7.96629	7.86651	7.76287	7.923	7.79439	7.81283	8.02084	7.87555	7.84046	7.91655	8.16048	7.88679	7.91131	7.92654	7.93652	7.89742	8.09129	7.98301	8.02226	7.94021	8.14973	8.03166	7.61528	7.57389	8.18596	8.20881	7.85032	7.85079	7.87602	7.87752	7.98619	7.92016	8.03218	8.04054
ENSMUSG00000003235	Eif2b5	6.71888	6.75267	6.53982	6.7649	6.79061	6.82348	7.21466	7.37654	7.41776	7.0964	7.3878	7.31416	6.92521	6.68358	6.82803	6.79705	6.78457	6.9032	6.59372	6.64407	6.84105	6.65503	6.77262	6.69216	6.82003	6.61833	6.86653	6.64059	6.71667	6.76106	6.39199	6.55454	6.44986	6.56936	6.77689	6.41659	6.67046	6.793	7.33632	7.26612	6.81227	6.82827	6.69295	6.7066	6.7683	6.70611	6.46546	6.58761
ENSMUSG00000003269	Cyth2	7.83429	7.69945	7.71299	7.81813	7.94344	7.71119	8.40751	8.45028	8.57859	8.42207	8.56186	8.60008	8.0157	7.88377	7.94086	7.98846	7.98413	7.90032	7.82925	7.90596	7.98292	7.92904	7.93115	7.91009	7.96253	8.06068	8.14266	8.05851	8.06838	8.11344	7.55364	7.59045	7.63203	7.56991	7.81491	7.59414	7.74891	7.82425	8.47879	8.52801	7.94678	7.95764	7.90604	7.92343	8.05529	8.08011	7.59204	7.65966
ENSMUSG00000003271	Sult2b1	3.26499	3.38052	3.26214	3.31899	3.31934	3.29586	4.16843	4.17086	4.23213	4.11899	4.17963	4.31093	3.60056	3.81157	3.88796	3.84875	3.96594	3.75596	3.83023	3.83324	3.8464	3.89218	3.85901	3.78814	4.042	4.0326	4.04784	4.03233	4.06144	4.06442	3.83152	3.86097	3.81886	3.82655	3.92116	3.8646	3.30255	3.31139	4.19048	4.20318	3.7667	3.85689	3.83662	3.84644	4.04081	4.05273	3.83712	3.87077
ENSMUSG00000003273	Car11	6.09246	6.35565	6.23845	6.33787	6.45358	6.46667	7.42742	7.42396	7.26364	7.37106	7.34518	7.3931	7.1539	7.36283	7.13477	7.14904	7.13738	7.2581	6.96106	7.01706	6.96538	6.87949	6.84242	7.0372	7.32985	7.41218	7.35671	7.21715	7.17806	7.25242	6.60827	6.57746	6.48228	6.61993	6.68035	6.88212	6.22885	6.41937	7.37167	7.36978	7.21717	7.1815	6.98117	6.91971	7.36625	7.21588	6.556	6.72747
ENSMUSG00000003279	Dlgap1	9.30992	9.37197	9.25792	9.36344	9.49818	9.44779	10.3201	10.3585	10.2968	10.3315	10.3933	10.3536	9.90155	9.86891	9.91359	9.93647	9.94076	10.0104	9.9693	10.0442	10.167	10.0722	10.0256	10.0794	10.1164	10.1213	10.2255	10.238	10.2639	10.2117	9.67108	9.60667	9.70576	9.56915	9.62347	9.65137	9.31327	9.43647	10.3252	10.3595	9.89468	9.96254	10.0602	10.0591	10.1544	10.2379	9.66117	9.61466
ENSMUSG00000003282	Plag1	NA	NA	NA	NA	NA	NA	2.6654	2.66696	2.63055	2.65518	2.7007	2.67255	NA	NA	NA	NA	NA	NA	2.23747	2.22334	2.19529	2.24081	2.21094	2.19546	2.94567	2.91642	2.85001	2.84902	2.91535	2.86956	NA	NA	NA	NA	NA	NA	NA	NA	2.6543	2.67614	NA	NA	2.2187	2.21574	2.90403	2.87798	NA	NA
ENSMUSG00000003299	Mrpl4	6.41693	6.42109	6.18963	6.47725	6.23598	6.40984	7.15288	7.08279	7.36974	7.06241	7.20024	7.25306	6.76612	6.67151	6.67729	6.69476	6.75011	6.68898	6.65008	6.58135	6.83639	6.72514	6.6509	6.71657	6.87603	6.54566	6.55183	6.75234	6.69782	6.69006	6.46229	6.32674	6.45508	6.30652	6.34429	6.31657	6.34255	6.37436	7.2018	7.1719	6.70498	6.71128	6.68927	6.69754	6.65784	6.71341	6.4147	6.32246
ENSMUSG00000003308	Keap1	6.66359	6.47955	6.34365	6.35416	6.47844	6.56104	7.14695	7.19028	7.24906	7.18172	7.23398	7.242	6.69394	6.44967	6.46996	6.65974	6.6551	6.69972	6.74825	6.80611	6.95628	6.79219	6.84884	6.88721	7.00018	6.96488	6.92045	6.99672	6.99894	6.82932	6.77554	6.71907	6.75205	6.75688	6.77584	6.85232	6.4956	6.46455	7.19543	7.21923	6.53786	6.67152	6.83688	6.84275	6.96183	6.94166	6.74888	6.79501
ENSMUSG00000003316	Glg1	11.4618	11.477	11.7184	11.3727	11.5027	11.6394	12.6558	12.9545	12.5559	12.7093	12.7012	12.7283	12.6851	13.4568	13.2729	13.1828	13.1677	13.0969	12.5289	12.5573	12.3643	12.611	12.5147	12.303	13.1072	13.4765	13.5511	13.1559	13.1538	13.4168	12.1723	12.5414	12.1508	12.196	12.0131	12.0032	11.5524	11.5049	12.7221	12.7129	13.1382	13.1491	12.4835	12.4762	13.3783	13.2422	12.2882	12.0708
ENSMUSG00000003344	Btbd2	7.62059	7.10881	6.77313	6.96306	6.93663	7.04943	7.7548	7.51567	7.75985	7.75138	7.65895	7.50988	7.13792	7.07373	7.08317	7.09271	7.01848	7.12304	7.46434	7.53539	7.77397	7.52159	7.41554	7.50701	7.65996	7.54487	7.46304	7.64073	7.45318	7.54882	7.37767	7.26453	7.30223	7.29248	7.49295	7.53437	7.16751	6.98304	7.67678	7.64007	7.09827	7.07808	7.59123	7.48138	7.55596	7.54758	7.31481	7.43993
ENSMUSG00000003345	Csnk1g2	5.86986	5.59299	5.55686	5.62643	5.77718	5.72851	6.61399	6.66784	6.73717	6.58144	6.64698	6.72383	6.25534	6.39251	6.43051	6.34789	6.16344	6.35902	6.1019	6.22973	6.24535	6.17016	6.18309	6.13494	6.45196	6.30397	6.3647	6.43137	6.34044	6.37856	5.85066	5.75556	5.85906	5.83649	5.70181	5.85111	5.67324	5.7107	6.673	6.65075	6.35946	6.29012	6.19233	6.16273	6.37354	6.38346	5.82176	5.79647
ENSMUSG00000003346	Abhd17a	6.00816	6.03185	5.63782	5.78356	5.983	6.06983	6.56294	6.53434	6.49659	6.5609	6.69878	6.69684	6.38414	6.51432	6.52494	6.5969	6.29422	6.60013	6.27478	6.36406	6.36883	6.25682	6.30843	6.28382	6.36726	6.48272	6.54169	6.38703	6.34859	6.47946	6.06948	6.1061	6.00935	5.89688	6.05566	6.01981	5.89261	5.94546	6.53129	6.65218	6.47447	6.49708	6.33589	6.28302	6.46389	6.40503	6.06164	5.99078
ENSMUSG00000003348	Mob3a	4.20808	4.18083	4.17885	4.03968	4.02903	4.19505	4.45677	4.37212	4.41123	4.41708	4.435	4.37656	3.95405	3.97044	3.99132	4.12123	3.91078	3.88843	4.21254	4.20248	4.22955	4.21083	4.21867	4.30366	4.24583	4.21419	4.28845	4.26093	4.27635	4.29264	4.05468	3.94706	3.95882	4.11505	4.052	4.12622	4.18925	4.08792	4.41337	4.40954	3.97194	3.97348	4.21486	4.24439	4.24949	4.27664	3.98685	4.09775
ENSMUSG00000003352	Cacnb3	5.26989	5.12286	5.31678	5.15589	5.26783	5.21285	5.74262	5.66288	5.74233	5.67506	5.66901	5.66768	5.57692	5.44789	4.95843	5.23001	5.4509	5.21794	5.4694	5.59648	5.49649	5.51784	5.56179	5.50641	5.53142	5.63863	5.4326	5.40049	5.47025	5.56016	5.31973	5.28821	5.24891	5.2811	5.41311	5.44572	5.23651	5.21219	5.71594	5.67058	5.32775	5.29962	5.52079	5.52868	5.53422	5.47697	5.28562	5.37998
ENSMUSG00000003354	Ccdc65	4.33067	4.32141	4.23412	4.41178	4.30326	4.29495	4.91818	4.92422	4.9853	4.88928	4.96972	5.0071	4.82271	4.63386	4.79146	4.53238	4.69615	4.65661	4.67765	4.71792	4.70942	4.71753	4.71848	4.71147	4.94319	4.74615	4.76784	4.82083	4.77977	4.74724	5.26247	5.01197	4.89123	5.18961	5.13985	5.25708	4.2954	4.33666	4.94257	4.95536	4.74935	4.62838	4.70166	4.71583	4.81906	4.78261	5.05522	5.19551
ENSMUSG00000003355	Fkbp11	3.59751	3.62846	3.6273	3.59347	3.64674	3.70188	4.76469	4.84113	4.75283	4.85034	4.71969	4.8252	4.90983	5.09632	4.85371	4.87531	4.85235	5.00591	4.52336	4.59978	4.41985	4.48874	4.54298	4.42093	5.16658	5.26493	5.17395	5.14017	5.2235	5.1853	4.33046	4.43308	4.30724	4.35588	4.28208	4.24875	3.61776	3.64736	4.78621	4.79841	4.95329	4.91119	4.51433	4.48422	5.20182	5.18299	4.35692	4.29557
ENSMUSG00000003360	Ddx23	7.83721	7.72414	7.68369	7.57432	7.71978	7.61604	8.27453	8.37806	8.45375	8.39813	8.42349	8.38114	7.79762	7.52247	7.58947	7.57593	7.53318	7.65344	7.95448	7.86099	8.04792	8.07898	7.95964	8.09339	8.23592	7.93072	7.97133	8.04864	8.05611	7.94907	7.85818	7.58314	7.73441	7.55772	7.72689	7.61611	7.74835	7.63672	8.36878	8.40092	7.63652	7.58752	7.95446	8.044	8.04599	8.01794	7.72525	7.63357
ENSMUSG00000003363	Pld3	10.2576	10.0399	9.96328	10.058	10.1692	10.2572	11.0759	11.2373	11.0691	11.0902	11.1361	11.0994	11.0434	11.6991	11.4454	11.3402	11.3684	11.2161	10.7716	10.7668	10.8049	10.8614	10.6334	10.6774	11.4065	11.2854	11.4437	11.0042	11.0395	11.0669	10.6218	10.5362	10.5922	10.4618	10.5426	10.5966	10.0869	10.1615	11.1274	11.1086	11.396	11.3082	10.7811	10.7241	11.3786	11.0369	10.5834	10.5337
ENSMUSG00000003378	Grik5	5.54853	5.43713	5.55179	5.6018	5.50462	5.70872	6.58589	6.61313	6.43694	6.44163	6.58771	6.42916	6.22614	6.3931	6.27704	6.16739	6.29482	6.21597	6.4264	6.28837	6.35378	6.3075	6.32578	6.24652	6.49795	6.71069	6.61652	6.44615	6.42688	6.57063	5.73609	5.7892	5.81463	5.79227	5.6663	5.60374	5.51249	5.60504	6.54532	6.48616	6.29876	6.22606	6.35618	6.29327	6.60839	6.48122	5.77997	5.68744
ENSMUSG00000003380	Rabac1	9.1621	9.2386	8.96443	9.03675	9.21762	9.16668	10.0869	10.0137	9.92884	10.0141	9.97673	9.97331	9.72888	9.84331	9.72709	9.82953	9.73285	9.78449	9.71371	9.74718	9.81434	9.80226	9.68642	9.67703	9.73303	10.0326	9.98417	9.85632	9.80368	9.8925	9.51398	9.38354	9.43899	9.32988	9.56907	9.56319	9.12171	9.14035	10.0098	9.98804	9.76643	9.78229	9.75841	9.72191	9.9166	9.85083	9.4455	9.48738
ENSMUSG00000003382	Etv3	4.70932	4.9495	4.82322	4.79927	4.83947	4.8914	5.68032	5.64366	5.80705	5.69974	5.80313	5.72494	5.42996	5.47852	5.63261	5.53014	5.45709	5.54446	5.6303	5.58038	5.59157	5.65592	5.51869	5.63058	5.69848	5.85325	5.65847	5.85341	5.77532	5.71235	5.52429	5.46781	5.49197	5.52982	5.77266	5.67603	4.82735	4.84338	5.71034	5.7426	5.51369	5.51056	5.60075	5.60173	5.73673	5.78036	5.49469	5.6595
ENSMUSG00000003402	Prkcsh	9.24601	9.1899	9.1844	9.02997	9.18415	9.33811	10.0767	10.3127	10.0554	10.0832	10.0952	10.1957	10.1202	11.037	10.7935	10.7467	10.6384	10.5693	9.82322	9.97814	9.95702	9.98308	9.7615	9.82292	10.3838	10.5072	10.6714	10.1971	10.2212	10.2912	9.49757	9.69961	9.39062	9.2432	9.33678	9.34084	9.20677	9.18408	10.1483	10.1247	10.6503	10.6515	9.91946	9.85583	10.5208	10.2365	9.52927	9.30694
ENSMUSG00000003410	Elavl3	8.81195	8.81608	8.74143	8.62025	8.72742	8.56306	9.39695	9.13869	9.30321	9.43363	9.22155	9.27838	9.01696	9.01427	9.1916	9.02313	8.93721	9.06815	9.3251	9.27443	9.26724	9.26148	9.24365	9.34451	9.44965	9.46178	9.3582	9.49023	9.49158	9.45201	9.27123	9.21758	9.12816	9.02065	9.10119	9.1788	8.78982	8.63691	9.27962	9.31119	9.07428	9.00949	9.28892	9.28321	9.42321	9.47794	9.20565	9.10021
ENSMUSG00000003411	Rab3b	8.20963	8.05434	7.86027	7.81523	7.88562	7.93332	8.54952	8.4746	8.80393	8.56893	8.57365	8.62592	8.23207	8.0559	8.0276	7.99525	8.01647	8.10391	8.59273	8.59687	8.88199	8.74275	8.69689	8.79841	9.26334	8.56321	8.39034	8.68362	8.66624	8.52959	8.59894	8.28055	8.46184	8.48545	8.54473	8.56477	8.04141	7.87806	8.60935	8.5895	8.10519	8.03854	8.69053	8.74601	8.73897	8.62649	8.44711	8.53165
ENSMUSG00000003418	St8sia6	3.11357	3.15998	3.28174	3.27365	3.23399	3.24772	4.06926	4.18427	4.04567	4.1872	4.11489	4.08014	4.66523	4.99246	5.00804	4.63312	4.53819	4.79922	4.10497	4.11642	4.051	4.12244	4.1894	4.06279	5.2219	5.48943	5.35124	5.1151	5.25634	5.41294	3.93027	3.97326	3.93663	4.00372	3.89498	3.89741	3.1851	3.25179	4.09973	4.12741	4.88857	4.65684	4.0908	4.12487	5.35419	5.26146	3.94672	3.93204
ENSMUSG00000003420	Fcgrt	2.54443	2.63488	2.73084	2.57104	2.61603	2.60186	3.184	3.19246	3.17886	3.13412	3.18701	3.10809	3.11753	3.12794	3.05372	3.11858	3.07958	3.16067	3.13782	3.12712	3.12162	3.11571	3.14605	3.13937	3.00176	3.02452	3.14033	3.07936	3.06544	3.14016	2.80584	2.84223	2.82947	2.7769	2.89786	2.78326	2.63672	2.59631	3.18511	3.14308	3.09973	3.11961	3.12885	3.13371	3.05553	3.09498	2.82584	2.81934
ENSMUSG00000003421	Nosip	7.0511	6.84614	6.67999	6.78289	6.73797	6.78885	7.41175	7.18928	7.41036	7.28698	7.28669	7.3184	6.94652	6.81053	7.04475	6.99052	6.78332	6.83859	7.32493	7.31757	7.47025	7.23989	7.35347	7.56571	7.0468	6.9943	7.13045	7.03117	7.1108	7.11759	7.10569	6.98747	7.09245	7.18507	7.18853	7.15978	6.85908	6.7699	7.33713	7.29736	6.93393	6.87081	7.37092	7.38636	7.05718	7.08652	7.06187	7.1778
ENSMUSG00000003423	Pih1d1	6.03361	5.95583	5.8102	5.89847	5.79243	5.89109	6.41899	6.36614	6.41132	6.33412	6.2504	6.35518	5.94293	5.86141	5.7983	5.74906	5.72113	5.8221	6.11308	6.04785	6.17972	6.08792	6.10052	6.08013	6.19642	5.94809	6.07524	6.11209	6.1378	6.06214	5.9149	5.84158	5.74197	5.90037	5.91097	5.91266	5.93321	5.86067	6.39882	6.31323	5.86755	5.7641	6.11355	6.08953	6.07325	6.10401	5.83281	5.908
ENSMUSG00000003429	Rps11	8.21352	8.17949	8.19611	8.12099	8.05814	8.30979	8.96726	8.76573	8.92193	8.92804	8.84083	8.94447	8.68116	8.7135	8.71554	8.71953	8.71072	8.67146	8.9095	8.94147	8.70122	8.80932	8.94069	8.75359	9.05442	9.0909	9.08605	9.11348	9.07935	9.16415	8.52653	8.6584	8.60708	8.49441	8.29862	8.54487	8.19638	8.16297	8.88497	8.90445	8.7034	8.70057	8.85073	8.83454	9.07712	9.11899	8.59734	8.44597
ENSMUSG00000003435	Supt5	8.43638	8.18286	8.15742	7.86714	8.02814	8.13456	8.56446	8.61662	8.76186	8.64716	8.78465	8.75536	8.20349	8.3646	8.33494	8.48192	8.46288	8.33438	8.24738	8.21548	8.61747	8.29219	8.28545	8.44255	8.66753	8.32364	8.46062	8.47112	8.45202	8.42076	8.52715	8.50031	8.37145	8.41787	8.55304	8.48161	8.25889	8.00995	8.64765	8.72906	8.30101	8.42639	8.36011	8.34007	8.48393	8.44797	8.4663	8.48417
ENSMUSG00000003437	Paf1	7.00572	7.08544	7.04896	7.12078	7.07232	7.17845	7.97833	7.9965	7.91901	8.08162	7.98539	8.0841	7.40074	7.30765	7.24235	7.46801	7.51707	7.4406	7.68488	7.57944	7.77025	7.64602	7.56826	7.75182	7.72247	7.64997	7.69366	7.85964	7.91635	7.72556	7.87299	7.71123	7.7255	7.82079	7.95239	7.86485	7.04671	7.12385	7.96461	8.05037	7.31691	7.47523	7.67819	7.65537	7.6887	7.83385	7.76991	7.87935
ENSMUSG00000003438	Timm50	6.75526	6.85953	6.75918	6.61666	6.50932	6.60247	7.41039	7.22365	7.25356	7.28223	7.22304	7.30886	6.84776	6.83983	6.79753	6.77881	6.75591	6.8005	7.08615	7.07632	7.13627	7.11372	7.14627	7.26056	7.23449	7.18961	7.17524	7.20983	7.19251	7.20912	6.84068	6.92002	6.9045	6.88611	7.01996	6.98569	6.79132	6.57615	7.29587	7.27138	6.82838	6.77841	7.09958	7.17352	7.19978	7.20382	6.8884	6.96392
ENSMUSG00000003444	Med29	4.42878	4.14209	4.10582	4.17409	4.21848	4.08716	4.86036	4.79261	4.76981	4.75713	4.77496	4.7733	4.23065	4.21766	4.06818	4.17292	4.20915	4.15144	4.42732	4.39825	4.45875	4.45406	4.44153	4.37656	4.76394	4.67712	4.53384	4.5942	4.69141	4.6672	4.27752	4.19408	4.23298	4.23771	4.28227	4.20083	4.22556	4.15991	4.80759	4.76846	4.17216	4.17784	4.42811	4.42405	4.6583	4.65094	4.23486	4.24027
ENSMUSG00000003452	Bicd1	7.5641	7.5473	7.73432	7.84524	7.70429	7.66194	8.51996	8.63309	8.63208	8.65754	8.68663	8.62757	8.28794	8.17307	8.23478	8.02589	8.19592	8.12659	8.33446	8.27933	8.36091	8.36652	8.3865	8.36262	8.50024	8.67594	8.59138	8.61255	8.6117	8.56914	8.14807	8.12417	8.27704	8.24778	8.20675	8.13576	7.61524	7.73716	8.59504	8.65725	8.23193	8.11613	8.3249	8.37188	8.58919	8.59779	8.18309	8.19676
ENSMUSG00000003458	Ncstn	8.7173	8.71742	8.91703	8.71518	8.90067	9.03535	9.9274	10.251	9.79944	9.97097	9.99967	9.90093	9.96609	10.7767	10.6318	10.4864	10.476	10.4036	9.77559	9.91846	9.61634	9.84387	9.92879	9.64666	10.3275	10.7354	10.8238	10.3525	10.382	10.6786	9.47672	9.78885	9.4962	9.53252	9.37587	9.4035	8.78392	8.88373	9.99262	9.95719	10.4582	10.4553	9.77013	9.80644	10.6289	10.4711	9.58726	9.4373
ENSMUSG00000003464	Pex19	8.01513	7.97745	8.10435	7.97851	8.03541	7.93902	8.73583	8.58242	8.62132	8.71702	8.64769	8.63077	8.20733	8.04408	8.08861	8.10443	7.98743	8.10887	8.33453	8.31252	8.27113	8.26731	8.34367	8.27322	8.18957	8.23085	8.25859	8.4145	8.35834	8.36478	8.07292	8.11646	8.12392	8.05485	8.15777	8.2175	8.03231	7.98431	8.64652	8.66516	8.11334	8.06691	8.30606	8.29473	8.22633	8.37921	8.10443	8.14338
ENSMUSG00000003469	Phyhip	10.0327	9.8099	9.82438	9.77624	9.72213	9.76319	10.6115	10.333	10.5458	10.6379	10.4701	10.4282	9.9629	9.93765	10.1161	9.81298	9.93618	9.85014	10.3563	10.2279	10.4743	10.2513	10.2929	10.3625	10.1834	10.2527	10.1522	10.443	10.3676	10.2995	10.1693	10.0771	10.1381	9.97815	10.1419	10.191	9.88899	9.75386	10.4968	10.5121	10.0056	9.86643	10.3528	10.3023	10.1961	10.37	10.1282	10.1037
ENSMUSG00000003500	Impdh1	7.33166	7.30642	7.15252	7.1841	7.20467	7.34449	7.9232	7.88203	8.03538	7.87489	8.03729	7.9545	7.35602	7.35843	7.39029	7.46829	7.48484	7.32331	7.44436	7.52403	7.53009	7.50066	7.42111	7.61946	7.64343	7.2347	7.33589	7.41456	7.46658	7.30929	7.25659	7.09643	7.19881	7.10596	7.18796	7.15647	7.26353	7.24442	7.94687	7.95556	7.36824	7.42548	7.49949	7.51374	7.40468	7.39681	7.18394	7.15013
ENSMUSG00000003518	Dusp3	7.56852	7.57554	7.18197	7.43515	7.47213	7.53079	8.23679	8.33717	8.27885	8.22038	8.22521	8.14665	8.01331	8.05645	8.09302	8.04075	8.04551	8.16041	8.08732	8.19139	8.12478	8.1435	8.05254	8.0449	8.4724	8.44084	8.29056	8.35563	8.27398	8.33189	7.89343	7.85159	7.95939	8.0046	8.03566	8.05531	7.44201	7.47936	8.28427	8.19741	8.05426	8.08222	8.1345	8.08031	8.40127	8.3205	7.90147	8.03186
ENSMUSG00000003526	Prodh	2.43461	2.27339	2.49675	2.38775	2.43234	2.3006	2.89702	2.92259	2.97322	2.87708	2.92294	2.86383	2.35437	2.46239	2.31934	2.26042	2.32302	2.35699	3.06468	3.04267	3.15348	3.0614	3.07236	3.05083	2.17703	2.09163	2.08703	2.17197	2.06916	2.13421	2.45895	2.45181	2.48517	2.46996	2.47973	2.46336	2.40158	2.37357	2.93094	2.88795	2.3787	2.31348	3.08694	3.06153	2.11856	2.12512	2.46531	2.47101
ENSMUSG00000003527	Ess2	5.73569	5.70822	5.67618	5.68548	5.74934	5.75212	6.16155	6.13434	6.22055	6.21569	6.16547	6.20083	5.67171	5.54041	5.68155	5.69984	5.48267	5.59452	5.82731	5.89196	5.8403	5.72566	5.83688	5.96333	6.05705	5.82807	5.73107	6.0138	5.91918	5.90799	5.80968	5.64731	5.69762	5.63224	5.85782	5.91687	5.7067	5.72898	6.17215	6.194	5.63122	5.59234	5.85319	5.84196	5.87207	5.94699	5.7182	5.80231
ENSMUSG00000003528	Slc25a1	5.48778	5.32351	5.12572	5.42326	5.43621	5.3063	6.01702	6.08123	6.0785	6.02266	6.10862	6.09548	5.64927	5.47544	5.46215	5.42481	5.43413	5.41296	5.88585	5.8776	5.98814	5.88244	5.90265	5.92556	6.06648	5.86985	5.77749	5.85385	5.803	5.87999	5.8633	5.8454	5.845	5.79504	5.83162	5.85303	5.31234	5.38859	6.05892	6.07559	5.52895	5.42397	5.91719	5.90355	5.90461	5.84561	5.85123	5.82656
ENSMUSG00000003531	Dgcr6	5.35989	5.227	5.26142	5.12982	5.25135	5.2361	5.77335	5.8734	5.90484	5.68448	5.83455	5.93528	5.46434	5.66528	5.52476	5.64944	5.46761	5.638	5.61157	5.43849	5.70291	5.53259	5.49744	5.41667	5.94365	5.96829	5.92678	5.96656	5.92748	5.94338	5.2792	5.31559	5.31126	5.23104	5.34184	5.33914	5.28277	5.20576	5.85053	5.8181	5.55146	5.58501	5.58432	5.48223	5.94624	5.94581	5.30201	5.30401
ENSMUSG00000003534	Ddr1	6.455	6.4385	6.47118	6.49507	6.58793	6.57887	7.50297	7.56542	7.48318	7.61692	7.50078	7.43307	7.3819	7.92202	7.76387	7.48325	7.60382	7.47954	7.13072	7.08478	7.13929	7.11011	7.17067	7.14805	7.5046	7.6604	7.80873	7.58348	7.49542	7.54244	6.83011	6.97077	6.90223	6.93872	7.05825	6.98551	6.4549	6.55396	7.51719	7.51692	7.68926	7.52221	7.11826	7.14295	7.65791	7.54045	6.90104	6.99416
ENSMUSG00000003541	Ier3	5.0833	4.86722	4.77299	4.77346	4.70604	4.74779	5.61615	5.4163	5.43447	5.48978	5.35093	5.47072	5.43753	5.42684	5.52726	5.55922	5.2886	5.52573	5.42664	5.34056	5.37176	5.31732	5.2958	5.3218	5.15787	5.28607	5.49324	5.52223	5.58296	5.35327	4.82805	4.77278	4.75509	4.74775	4.75778	4.89352	4.90784	4.74243	5.48897	5.43714	5.46388	5.45785	5.37965	5.31164	5.31239	5.48615	4.78531	4.79968
ENSMUSG00000003545	Fosb	NA	NA	NA	NA	NA	NA	NA	NA	NA	NA	NA	NA	NA	NA	NA	NA	NA	NA	NA	NA	NA	NA	NA	NA	2.12293	2.08355	2.07489	2.15828	2.05736	2.04355	3.31124	3.34823	3.33859	3.46457	3.63499	3.50084	NA	NA	NA	NA	NA	NA	NA	NA	2.09379	2.0864	3.33269	3.53346
ENSMUSG00000003546	Klc4	5.31609	5.46912	5.12327	5.3098	5.31541	5.36993	6.05301	6.01591	6.11082	5.95449	6.09016	6.14471	5.51532	5.37685	5.53891	5.55278	5.52082	5.36447	5.49048	5.55822	5.88252	5.53704	5.50572	5.5841	5.41166	5.35093	5.38285	5.49261	5.41082	5.22949	5.55797	5.54827	5.47297	5.38819	5.53723	5.52223	5.30283	5.33172	6.05991	6.06312	5.47702	5.47936	5.64374	5.54228	5.38181	5.37764	5.5264	5.48255
ENSMUSG00000003549	Ercc1	5.90574	5.74649	5.73617	5.66367	5.6606	5.56441	6.58633	6.33887	6.3835	6.5259	6.48778	6.49572	6.01983	5.97512	5.76578	5.83914	5.77337	5.70125	6.28836	6.37068	6.27933	6.23444	6.28179	6.32766	6.46392	6.50565	6.39419	6.44982	6.54078	6.40027	6.27309	6.07005	6.12335	6.17572	6.38096	6.33022	5.79613	5.62956	6.43623	6.50313	5.92024	5.77125	6.31279	6.2813	6.45459	6.46362	6.1555	6.29563
ENSMUSG00000003559	As3mt	3.7875	3.71903	3.6842	3.5749	3.69125	3.7309	4.23395	4.1765	4.24484	4.20594	4.16022	4.24791	3.79129	3.66936	3.6505	3.67495	3.62793	3.64451	4.01547	4.05487	4.08081	4.02862	4.05757	3.98803	4.23085	4.05218	4.11001	4.13472	4.17653	4.22803	3.73931	3.73978	3.73105	3.8772	3.85822	3.89163	3.73025	3.66568	4.21843	4.20469	3.70372	3.64913	4.05038	4.02474	4.13101	4.17976	3.73672	3.87568
ENSMUSG00000003573	Homer3	10.1277	10.1228	9.89183	9.79455	9.86147	9.91011	10.4543	10.3666	10.6501	10.4856	10.4829	10.6114	10.0484	10.3048	10.2039	10.6832	10.1953	10.368	10.1664	10.2433	10.2843	9.99335	10.0976	10.1685	9.72102	10.1062	10.2617	10.2446	10.2501	10.3177	9.62364	9.86011	9.71976	9.47259	9.56029	9.58022	10.0474	9.85538	10.4903	10.5266	10.1857	10.4155	10.2313	10.0865	10.0296	10.2708	9.7345	9.5377
ENSMUSG00000003575	Crtc1	7.55249	7.45179	7.43937	7.3169	7.35282	7.33199	8.0019	7.78405	7.89657	7.96315	7.84703	7.9017	7.33835	7.51465	7.54568	7.46559	7.44195	7.53356	7.67172	7.49445	7.82841	7.5177	7.57546	7.70017	7.60744	7.61023	7.68283	7.577	7.52002	7.63604	7.61586	7.56743	7.48231	7.35996	7.70455	7.54396	7.48122	7.3339	7.89417	7.90396	7.46622	7.48037	7.66486	7.59778	7.6335	7.57769	7.5552	7.53615
ENSMUSG00000003581	Rnf215	5.12866	5.03387	4.96606	5.11033	5.13025	5.09261	6.10364	6.16149	6.08302	6.02055	6.06783	6.1244	5.71582	5.83587	5.76151	5.87989	5.84851	5.83311	5.36299	5.39749	5.37671	5.35258	5.40082	5.38264	5.60878	5.50358	5.62102	5.61685	5.62168	5.48044	4.97475	5.02648	5.10743	4.93504	5.10276	5.0374	5.04286	5.11106	6.11605	6.07093	5.77106	5.85384	5.37907	5.37868	5.57779	5.57299	5.03622	5.02507
ENSMUSG00000003585	Sec14l2	6.27804	6.0461	5.98872	5.89532	6.00672	5.98554	6.55243	6.48962	6.61181	6.49798	6.48298	6.69277	6.06176	5.95649	5.75513	5.97524	5.97392	5.91192	6.44157	6.3804	6.455	6.51328	6.45149	6.47281	6.58709	6.39994	6.34066	6.39268	6.44668	6.43578	6.53262	6.26344	6.32091	6.32214	6.28874	6.37937	6.10429	5.96252	6.55129	6.55791	5.92446	5.95369	6.42566	6.4792	6.44256	6.42505	6.37232	6.33008
ENSMUSG00000003604	Aven	3.92911	3.89855	3.87736	3.84776	3.92666	3.87694	4.6729	4.63128	4.73853	4.69913	4.6883	4.72647	4.54931	4.509	4.41219	4.49228	4.46788	4.53177	4.44565	4.45705	4.47368	4.43183	4.45	4.48427	4.6964	4.76712	4.56357	4.71533	4.64998	4.66368	4.20873	4.27737	4.16703	4.20224	4.19416	4.20358	3.90167	3.88379	4.6809	4.70463	4.49017	4.49731	4.4588	4.45537	4.6757	4.67633	4.21771	4.19999
ENSMUSG00000003617	Cp	3.3764	3.48173	3.58322	3.55708	3.49377	3.52226	4.9161	5.06049	4.86563	4.91484	4.89043	4.97353	5.49795	5.3377	4.96949	5.10437	5.35499	5.28221	4.77236	4.74028	4.65662	4.70278	4.78941	4.75338	4.91506	5.18183	5.23547	5.14653	5.1506	5.15884	5.04523	4.88664	4.78814	5.05209	5.00296	4.83714	3.48045	3.52437	4.94741	4.92627	5.26838	5.24719	4.72309	4.74852	5.11079	5.15199	4.90667	4.96406
ENSMUSG00000003623	Crot	6.71046	6.96157	6.72593	6.69197	6.5915	6.62557	7.314	7.19455	7.32106	7.30327	7.31525	7.13834	6.82226	6.74419	6.60103	6.79634	6.76695	6.70645	7.3334	7.38523	7.39031	7.42516	7.5385	7.48041	7.42286	7.34239	7.21501	7.38451	7.48762	7.36829	7.27369	7.26985	7.30718	7.52542	7.49735	7.44749	6.79932	6.63634	7.27654	7.25229	6.7225	6.75658	7.36965	7.48136	7.32675	7.41347	7.28357	7.49009
ENSMUSG00000003644	Rps6ka1	7.98255	7.49296	7.65712	7.61913	7.67474	7.73169	8.48503	8.35299	8.42092	8.54977	8.43764	8.24995	7.95253	7.59797	7.61513	7.32378	7.82096	7.8199	8.19281	8.04493	8.24932	8.08017	8.08131	7.98795	8.13044	8.19302	8.02949	8.20668	7.99378	8.16005	7.45546	7.42331	7.51873	7.27438	7.35073	7.44512	7.71088	7.67519	8.41965	8.41245	7.72188	7.65488	8.16235	8.04981	8.11765	8.12017	7.46583	7.35675
ENSMUSG00000003657	Calb2	10.5146	10.1445	10.6369	10.2661	10.1759	10.2374	10.9668	10.6579	10.8524	11.0364	10.6875	10.6959	10.5458	10.3294	10.3462	9.77677	10.3605	10.3512	10.6239	10.4985	10.7897	10.7269	10.5899	10.5751	10.6461	10.6652	10.5425	10.6242	10.5112	10.613	10.2992	10.0744	10.321	9.90986	10.0079	10.0367	10.432	10.2265	10.8257	10.8066	10.4071	10.1628	10.6374	10.6306	10.618	10.5828	10.2315	9.98483
ENSMUSG00000003660	Snrnp200	8.87077	8.71292	8.47807	8.53674	8.47248	8.53283	9.33586	9.10088	9.26803	9.20873	9.23329	9.12496	8.78185	8.76767	8.71859	8.66396	8.65138	8.53636	8.92208	8.94658	9.18156	8.87578	8.90246	9.10906	9.23214	8.8807	8.80274	9.00986	9.04534	8.80425	9.31237	9.22872	9.22584	9.31944	9.52637	9.47471	8.68725	8.51402	9.23492	9.18899	8.75604	8.61723	9.01674	8.96243	8.97186	8.95315	9.25564	9.44018
ENSMUSG00000003662	Ciao1	6.44599	6.24737	5.87904	6.29876	6.41437	6.46754	7.00865	6.99033	6.9224	6.93703	7.0245	6.97397	6.47251	6.39797	6.77939	6.74428	6.55167	6.46978	6.67749	6.62439	6.89113	6.65112	6.7034	6.77901	6.66544	6.39331	6.43109	6.56521	6.53245	6.53862	6.78968	6.82955	6.74605	6.7096	6.9123	6.79338	6.1908	6.39356	6.97379	6.9785	6.54996	6.58858	6.731	6.71118	6.49661	6.54543	6.78843	6.80509
ENSMUSG00000003665	Has1	2.26265	2.34474	2.23341	2.31589	2.25032	2.29554	2.80891	2.79635	2.8801	2.86436	2.89225	2.84899	2.62312	2.68756	2.7841	2.8194	2.60829	2.64172	2.7851	2.79102	2.85206	2.74279	2.74563	2.81521	2.58289	2.53921	2.60449	2.48644	2.60469	2.4865	NA	NA	NA	NA	NA	NA	2.28027	2.28725	2.82845	2.86853	2.69826	2.68981	2.8094	2.76788	2.57553	2.52588	NA	NA
ENSMUSG00000003680	Taf6l	5.16397	5.08412	4.90822	5.0374	5.0864	5.0578	5.75022	5.69303	5.68896	5.74971	5.70572	5.72949	5.42937	5.56154	5.56123	5.54723	5.56505	5.40343	5.43481	5.46047	5.44507	5.47921	5.40424	5.38425	5.94214	5.82757	5.96167	5.98531	5.83302	5.90102	4.92175	5.12949	4.9518	5.07432	5.13293	5.13941	5.0521	5.06053	5.71074	5.72831	5.51738	5.50524	5.44678	5.42257	5.91046	5.90645	5.00101	5.11556
ENSMUSG00000003721	Insig2	7.35875	7.31881	7.64304	7.41183	7.45019	7.50478	8.48249	8.71138	8.56149	8.44392	8.56832	8.52875	8.31316	8.67409	8.70753	8.66588	8.6585	8.60712	8.1419	8.10763	7.99035	8.06926	8.10641	8.02376	8.40332	8.52241	8.61807	8.31019	8.41952	8.35614	7.42623	7.48553	7.55488	7.48373	7.43715	7.40558	7.4402	7.4556	8.58512	8.51366	8.56493	8.64383	8.07996	8.06648	8.5146	8.36195	7.48888	7.44215
ENSMUSG00000003731	Kpna6	8.07436	8.07896	7.953	8.01265	7.94559	8.06299	8.62055	8.65902	8.62999	8.63853	8.73556	8.72473	8.19266	8.1834	8.31269	8.37401	8.39941	8.33346	8.37189	8.31877	8.45542	8.45266	8.47079	8.45474	8.63218	8.45097	8.48219	8.61816	8.62265	8.51481	8.332	8.3242	8.41341	8.41455	8.47597	8.21743	8.03544	8.00708	8.63652	8.69961	8.22958	8.36896	8.38203	8.4594	8.52178	8.58521	8.35654	8.36932
ENSMUSG00000003746	Man1a	7.67027	7.81936	8.08819	7.80623	7.86603	7.93	9.01271	9.2742	8.88456	9.08312	9.1236	9.07016	9.04099	9.6815	9.53932	9.57869	9.45501	9.50523	8.77031	8.87325	8.56415	8.78821	8.79242	8.70714	9.05393	9.54767	9.78634	9.33347	9.47899	9.51932	8.1493	8.451	8.27481	8.05098	8.00946	7.9553	7.85927	7.86742	9.05716	9.09229	9.4206	9.51298	8.7359	8.76259	9.46265	9.44393	8.2917	8.00525
ENSMUSG00000003752	Itpkc	4.14269	4.16149	4.19739	4.17704	4.11615	4.01404	4.78288	4.73433	4.82332	4.74627	4.71341	4.74689	4.53544	4.43518	4.22917	4.3773	4.37786	4.28284	4.69624	4.63679	4.70707	4.64995	4.59834	4.69181	4.75928	4.62809	4.6127	4.7041	4.70754	4.73245	4.2013	4.21239	4.08246	4.19449	4.16421	4.18674	4.16719	4.10241	4.78018	4.73552	4.39993	4.346	4.68003	4.6467	4.66669	4.7147	4.16538	4.18181
ENSMUSG00000003762	Coq8b	3.4665	3.55093	3.51625	3.65474	3.57045	3.614	4.39979	4.42223	4.45348	4.37947	4.41293	4.40255	4.00712	4.00044	3.97637	4.03315	3.94633	3.97976	3.90212	3.94123	3.95576	3.83996	3.83857	3.92859	3.97169	3.88361	3.73985	3.85571	3.87199	3.78292	3.66481	3.65218	3.77624	3.60986	3.79274	3.74787	3.51123	3.61306	4.42517	4.39831	3.99465	3.98642	3.93303	3.86904	3.86505	3.83687	3.69774	3.71682
ENSMUSG00000003778	Brd8	8.12282	8.341	8.48667	8.24615	8.36223	8.35457	9.26044	9.0795	9.10522	9.2906	9.04866	9.08071	8.60598	8.24799	8.29764	8.29922	8.30827	8.34815	9.12114	9.12969	8.9776	9.14364	9.06007	9.03717	9.38289	9.45781	9.34987	9.49212	9.43344	9.53326	9.00938	9.25005	9.18633	9.08834	9.0471	8.99064	8.31683	8.32099	9.14839	9.13999	8.38387	8.31854	9.07614	9.08029	9.39686	9.48627	9.14859	9.04203
ENSMUSG00000003808	Farsa	6.00843	5.86897	5.73497	5.82761	5.78549	5.76277	6.28648	6.22416	6.36686	6.29147	6.32552	6.26547	5.63156	5.68386	5.82721	5.72664	5.69496	5.53351	5.71548	5.78452	5.88384	5.77912	5.86312	5.85304	6.0908	5.93927	5.92438	6.06671	6.08585	6.05347	6.11771	6.09857	6.00307	6.19244	6.28469	6.23625	5.87079	5.79196	6.2925	6.29415	5.71421	5.65171	5.79461	5.83176	5.98482	6.06868	6.07312	6.23779
ENSMUSG00000003809	Gcdh	5.21746	4.86769	4.83251	4.79127	4.92006	4.79029	5.29716	5.25759	5.30846	5.18462	5.25537	5.33571	4.98158	5.02436	4.92965	5.02595	4.97181	4.88221	5.34706	5.30253	5.44518	5.31756	5.36341	5.43196	5.28191	5.01201	5.18484	5.08971	5.26123	5.16678	5.20147	5.02486	5.08702	5.03527	5.0608	5.00788	4.97256	4.83387	5.28774	5.25857	4.97853	4.95999	5.36493	5.37098	5.15959	5.17257	5.10445	5.03465
ENSMUSG00000003810	Mast2	6.78709	6.75582	6.6414	6.82562	6.87362	6.69978	7.64582	7.75284	7.56633	7.63701	7.67646	7.70035	7.48064	7.64967	7.31481	7.41186	7.63919	7.67494	7.4648	7.43004	7.35254	7.27914	7.34802	7.3115	7.7166	7.67491	7.67947	7.50854	7.64698	7.43687	6.75928	6.83206	6.81555	6.90976	6.86071	6.87349	6.7281	6.79967	7.655	7.67127	7.4817	7.57533	7.41579	7.31289	7.69033	7.5308	6.8023	6.88132
ENSMUSG00000003812	Dnase2a	3.39361	3.05	3.1746	3.09999	3.1366	3.05466	3.77422	3.80428	3.83244	3.81605	3.78434	3.88672	2.81893	2.87904	2.807	2.72753	2.7806	2.76582	3.06181	2.91263	2.9264	2.92552	2.91374	2.91492	3.34948	3.25752	3.29426	3.39646	3.38423	3.3162	2.62572	2.64671	2.67664	2.71338	2.64699	2.6447	3.20607	3.09709	3.80365	3.82904	2.83499	2.75798	2.96695	2.91806	3.30042	3.36563	2.64969	2.66836
ENSMUSG00000003813	Rad23a	8.30734	8.1693	8.21283	8.15782	8.32153	8.22211	9.03208	8.90427	8.94524	8.96108	8.93982	9.05801	8.49513	8.32161	8.31204	8.36051	8.29348	8.5015	8.7993	8.81624	8.83042	8.78084	8.70339	8.70723	9.04304	8.9344	8.90132	9.05068	9.00062	9.01092	8.42576	8.4857	8.39911	8.3478	8.41488	8.46508	8.22982	8.23382	8.96053	8.9863	8.37626	8.38516	8.81532	8.73048	8.95959	9.02074	8.43686	8.40925
ENSMUSG00000003814	Calr	11.9444	11.9578	12.1845	11.938	12.0082	12.0261	13.0479	13.1636	13.0246	13.0496	12.9871	13.0427	13.1284	13.9333	13.7421	13.7289	13.691	13.4824	12.5763	12.6033	12.5988	12.6438	12.4908	12.5122	12.9969	13.093	13.2538	12.8458	12.8682	12.8239	11.7816	12.0725	11.8976	11.6681	11.607	11.6329	12.0289	11.9908	13.0787	13.0265	13.6013	13.6341	12.5928	12.5489	13.1146	12.8459	11.9172	11.636
ENSMUSG00000003824	Syce2	2.43549	2.50955	2.57194	2.55009	2.51206	2.43045	3.89774	3.8763	3.87421	3.84073	3.80884	3.87564	3.01391	3.01638	3.01348	3.06633	2.9551	3.08726	3.51691	3.48935	3.45641	3.45452	3.46417	3.43372	3.99321	4.15378	4.01719	4.11058	4.15186	4.23168	3.21988	3.34981	3.31057	3.25541	3.22595	3.26309	2.50566	2.49754	3.88275	3.84174	3.01459	3.03623	3.48756	3.4508	4.05473	4.16471	3.29342	3.24815
ENSMUSG00000003847	Nfat5	7.92202	8.22959	8.28996	8.16387	8.2623	8.20139	9.29656	9.24007	9.17215	9.33206	9.2215	9.1819	8.92232	8.92354	8.91193	8.87829	8.98473	8.88335	9.11169	9.11839	8.96747	9.18379	9.17546	9.04145	9.51395	9.7289	9.65384	9.54352	9.59149	9.69648	9.06369	9.2854	9.12905	9.13632	9.05737	8.94008	8.14719	8.20919	9.23626	9.24515	8.91926	8.91545	9.06585	9.13357	9.63223	9.61049	9.15938	9.04459
ENSMUSG00000003848	Nob1	6.44681	6.09469	6.1354	6.05618	6.02369	6.04175	6.7481	6.68947	6.74824	6.7151	6.746	6.73429	6.4597	6.46723	6.41728	6.53781	6.50835	6.31675	6.52536	6.54733	6.58471	6.61115	6.44697	6.66433	6.56238	6.46485	6.49974	6.48882	6.6579	6.47902	6.47711	6.33695	6.30435	6.33583	6.38416	6.40138	6.22563	6.04054	6.7286	6.7318	6.44807	6.45431	6.55247	6.57415	6.50899	6.54191	6.3728	6.37379
ENSMUSG00000003849	Nqo1	3.7314	3.49592	3.46249	3.54734	3.59243	3.56145	4.14527	4.17294	4.13716	4.1588	4.12254	4.10439	3.56189	3.64798	3.4862	3.55164	3.43063	3.46015	4.01178	4.02031	3.93723	3.93859	4.00399	3.99304	4.0768	4.04164	3.92185	3.96263	4.01968	3.95283	4.29327	4.27844	4.30389	4.35241	4.36382	4.34133	3.56327	3.56707	4.15179	4.12858	3.56535	3.48081	3.98977	3.97854	4.01343	3.97838	4.29187	4.35252
ENSMUSG00000003863	Ppfia3	7.31033	7.03736	6.88402	6.99122	6.9841	6.98777	7.79582	7.71116	7.90519	7.74809	7.77672	7.71217	7.30044	7.00149	7.06064	7.18686	7.08993	6.94554	7.35783	7.33092	7.50468	7.38789	7.33283	7.47262	7.41387	7.15347	7.13088	7.20441	7.23106	7.19632	7.53913	7.32128	7.27222	7.3443	7.58167	7.45954	7.07724	6.9877	7.80406	7.74566	7.12086	7.07411	7.39781	7.39778	7.23274	7.2106	7.37754	7.46184
ENSMUSG00000003865	Gys1	4.90578	4.89148	4.46742	4.51601	4.65037	4.76278	5.49677	5.53794	5.6829	5.52483	5.57704	5.51392	5.21791	5.2129	5.21485	5.38628	5.25285	5.14856	5.28595	5.19855	5.23205	5.22377	5.14442	5.22823	5.01067	5.03055	5.15694	5.03365	5.06867	5.14249	5.4725	5.52214	5.38978	5.49402	5.39381	5.46532	4.75489	4.64305	5.57254	5.5386	5.21522	5.26256	5.23885	5.19881	5.06605	5.0816	5.46147	5.45105
ENSMUSG00000003868	Ruvbl2	6.67694	6.46483	6.24269	6.39871	6.46118	6.30317	7.05083	7.06368	7.05561	7.05693	7.05858	7.20301	6.6435	6.46796	6.41705	6.46497	6.65839	6.57606	6.80632	6.80102	6.94351	6.84529	6.74511	6.78229	6.89467	6.7513	6.62442	6.79956	6.79115	6.75835	6.6483	6.6778	6.62206	6.57706	6.75302	6.73832	6.46149	6.38769	7.05671	7.10617	6.5095	6.56647	6.85029	6.7909	6.7568	6.78302	6.64939	6.68947
ENSMUSG00000003872	Lin7b	5.98539	6.01264	5.83559	5.99851	6.16346	6.05188	6.72526	6.53534	6.76296	6.65589	6.65947	6.71079	6.43511	6.21326	6.31369	6.3409	6.22713	6.4072	6.44217	6.4408	6.52045	6.47362	6.37029	6.37979	6.60757	6.25307	6.17998	6.35385	6.33497	6.23563	6.42219	6.27561	6.16758	6.05942	6.4053	6.25777	5.94454	6.07128	6.67452	6.67538	6.32069	6.32508	6.46781	6.4079	6.34688	6.30815	6.28846	6.24083
ENSMUSG00000003873	Bax	4.39783	4.39488	4.58406	4.3539	4.40364	4.44516	5.00562	4.95739	4.95428	4.99866	4.96219	5.01198	4.5368	4.4027	4.5078	4.4576	4.33757	4.43059	4.86918	4.77447	4.81429	4.85334	4.8219	4.75293	5.00535	4.84067	4.98149	5.0475	4.8741	4.89946	4.6536	4.62383	4.62469	4.72627	4.65582	4.70581	4.45892	4.4009	4.97243	4.99094	4.48243	4.40858	4.81931	4.80939	4.9425	4.94035	4.63404	4.69597
ENSMUSG00000003923	Tfam	7.51853	7.48807	7.83363	7.56126	7.39083	7.45567	8.37896	8.50787	8.48056	8.39776	8.49095	8.47847	8.18112	7.95712	8.04107	8.1002	8.14981	8.16433	8.1916	8.15173	8.08094	8.24071	8.22868	8.1671	8.42621	8.54825	8.49686	8.60358	8.57848	8.60938	7.89481	7.84629	7.89814	7.83344	7.70486	7.80912	7.61341	7.46925	8.4558	8.45573	8.05977	8.13811	8.14142	8.21216	8.49044	8.59715	7.87975	7.78247
ENSMUSG00000003929	Zfp81	5.26218	5.48519	5.63605	5.56091	5.47928	5.30337	6.65613	6.75276	6.61787	6.75079	6.63965	6.56087	6.36249	6.02438	6.01157	5.93011	6.22271	6.17666	6.59124	6.56313	6.47418	6.53573	6.61899	6.60878	6.58681	6.58399	6.60674	6.71194	6.65644	6.69904	6.03168	6.09584	6.17194	6.26043	6.01403	6.04403	5.46114	5.44786	6.67559	6.65044	6.13281	6.10982	6.54285	6.58783	6.59251	6.68914	6.09982	6.10616
ENSMUSG00000003934	Efnb3	3.59678	3.63095	3.54453	3.6257	3.61602	3.55775	4.35549	4.35249	4.24542	4.36237	4.35096	4.27087	4.54396	4.50405	4.42868	4.18756	4.31117	4.49067	4.11439	4.04199	4.05644	4.10853	4.01465	4.08046	3.88851	3.93119	3.83928	3.79429	3.89487	3.72639	3.91982	3.88499	4.00188	3.99505	3.98717	3.93979	3.59075	3.59982	4.3178	4.32807	4.49223	4.3298	4.07094	4.06788	3.88633	3.80518	3.93556	3.974
ENSMUSG00000003948	Mmd	3.67474	3.68334	3.72601	3.73693	3.69868	3.7864	4.98181	5.04814	4.9437	5.0782	5.01784	5.03031	5.14958	5.41239	5.28999	5.4338	5.09605	5.33356	4.85745	4.8576	4.77742	4.74823	4.82152	4.74153	4.70787	4.97257	5.01235	4.95798	5.0129	4.98963	4.02385	4.0679	4.0583	3.97131	3.98797	4.01142	3.6947	3.74067	4.99122	5.04212	5.28398	5.2878	4.83082	4.77043	4.8976	4.98684	4.05002	3.99023
ENSMUSG00000003949	Hlf	9.23013	8.98018	8.96648	8.85729	8.91892	8.99785	9.70195	9.74777	9.88237	9.63473	9.7203	9.70167	9.16761	9.20132	9.42435	9.30787	9.19989	9.22426	9.60397	9.62318	9.65181	9.69394	9.51973	9.53534	9.85321	9.77527	9.75517	9.78748	9.95216	9.8995	9.11875	9.1053	9.17101	9.1701	9.09359	9.1395	9.05893	8.92469	9.77736	9.68557	9.26443	9.24401	9.62632	9.583	9.79455	9.87971	9.13169	9.1344
ENSMUSG00000003955	Fam162a	8.19356	8.14535	8.25962	8.08676	8.13366	8.21034	8.80841	8.89892	9.0635	8.83377	8.88352	9.0725	8.51787	8.56393	8.48107	8.65607	8.51198	8.53388	8.69711	8.83317	8.75497	8.84452	8.70265	8.67419	8.96263	8.96842	8.99933	9.05628	9.07965	9.0733	8.26811	8.3111	8.30007	8.26607	8.12835	8.18892	8.19951	8.14359	8.92361	8.92993	8.52096	8.56731	8.76175	8.74046	8.97679	9.06974	8.29309	8.19445
ENSMUSG00000003970	Rpl8	8.7876	8.90731	8.65854	8.7256	8.76637	8.75866	9.43943	9.21552	9.23379	9.42565	9.22065	9.26548	8.97453	9.01526	9.02081	9.06611	8.99585	9.01434	9.26139	9.31354	9.38804	9.35127	9.21977	9.33643	9.38106	9.31362	9.19809	9.33631	9.22605	9.34548	9.23438	9.12337	9.15288	8.91279	9.0955	9.05219	8.78448	8.75021	9.29625	9.30393	9.00353	9.02543	9.32099	9.30249	9.29759	9.30261	9.17021	9.02016
ENSMUSG00000003974	Grm3	7.8444	8.06021	8.11717	8.06501	8.08725	8.05725	9.28103	9.49197	9.21279	9.42312	9.34142	9.27531	9.31211	9.81322	9.7796	9.61957	9.50182	9.60934	9.19678	9.24171	8.9998	9.226	9.25353	9.0829	9.56094	9.60952	9.71233	9.3994	9.40292	9.47085	8.41573	8.65241	8.44349	8.40671	8.11904	8.22344	8.00726	8.06984	9.3286	9.34662	9.63498	9.57691	9.1461	9.18748	9.6276	9.42439	8.50388	8.24973
ENSMUSG00000003992	Ssbp2	7.93867	8.08173	7.9165	8.05015	8.07843	7.96237	8.68898	8.61827	8.73012	8.70487	8.76035	8.71342	8.30822	8.19178	8.2334	8.26056	8.32143	8.34193	8.54099	8.44799	8.42794	8.39649	8.51444	8.53558	8.60885	8.48624	8.52873	8.59356	8.63369	8.48338	8.04681	7.88035	8.07277	8.06013	8.12384	8.13049	7.97896	8.03032	8.67912	8.72621	8.24447	8.30797	8.47231	8.48217	8.54127	8.57021	7.99998	8.10482
ENSMUSG00000004018	Fancl	3.11955	3.27457	3.15425	3.17215	3.19809	3.20616	3.76304	3.82139	3.78775	3.79481	3.80514	3.78417	3.43314	3.20862	3.34885	3.33817	3.31406	3.32105	3.80074	3.79795	3.80197	3.79389	3.77078	3.70816	3.70371	3.7633	3.7613	3.7869	3.80279	3.70254	3.18985	3.16165	3.26148	3.18614	3.09313	3.19548	3.18279	3.19213	3.79073	3.7947	3.3302	3.32443	3.80022	3.75761	3.74277	3.76408	3.20433	3.15825
ENSMUSG00000004031	Brinp2	7.58404	7.31738	7.23826	7.05332	7.37132	7.36335	7.92967	8.1668	8.17304	8.02924	8.17857	8.17262	7.97237	8.32626	8.28158	8.43973	8.11472	8.32685	7.69473	7.7724	7.77534	7.76367	7.75126	7.72335	8.04521	8.06682	8.20491	7.94166	8.00116	7.8383	7.14923	7.08036	7.12897	7.11488	7.17007	7.30078	7.37989	7.26266	8.08984	8.12681	8.1934	8.29377	7.74749	7.74609	8.10565	7.92704	7.11952	7.19524
ENSMUSG00000004032	Gstm5	8.42406	8.35203	8.15418	8.21183	8.17828	8.17431	8.87758	8.88562	9.08243	8.9196	8.91229	8.98992	8.50841	8.43854	8.41099	8.40848	8.3951	8.53865	8.8687	8.88277	8.86305	8.83207	8.81145	8.93246	9.19346	8.84667	8.79809	8.96162	8.93737	8.91469	8.63503	8.50377	8.6009	8.68944	8.74363	8.6282	8.31009	8.18814	8.94854	8.9406	8.45265	8.44741	8.87151	8.85866	8.94608	8.93789	8.5799	8.68709
ENSMUSG00000004035	Gstm7	3.91909	3.80052	3.77511	3.70603	3.6937	3.75004	4.16562	4.1632	4.13824	4.15526	4.19598	4.10335	3.75108	3.92844	3.6731	3.8681	3.87051	3.81388	3.87728	3.8262	3.87601	3.83746	3.90015	3.92388	3.8991	3.88189	3.8922	4.03939	4.12805	4.01803	3.47888	3.55704	3.4827	3.43713	3.55189	3.48737	3.83157	3.71659	4.15569	4.15153	3.78421	3.85083	3.85983	3.88716	3.89106	4.06183	3.50621	3.49213
ENSMUSG00000004040	Stat3	7.52548	7.34756	7.00693	7.25706	7.18892	7.29035	7.86585	7.80768	7.95127	7.88605	7.8673	7.83764	7.35953	7.28891	7.374	7.29512	7.32506	7.2906	7.68999	7.6895	7.88097	7.82634	7.72075	7.79225	7.92258	7.55553	7.51484	7.86209	7.77198	7.57988	7.87541	7.66295	7.70479	7.96293	8.19376	8.03853	7.29332	7.24544	7.87493	7.86366	7.34081	7.30359	7.75348	7.77978	7.66432	7.73798	7.74772	8.06507
ENSMUSG00000004043	Stat5a	NA	NA	NA	NA	NA	NA	NA	NA	NA	NA	NA	NA	NA	NA	NA	NA	NA	NA	NA	NA	NA	NA	NA	NA	1.56838	1.65098	1.70813	1.5887	1.5528	1.62568	NA	NA	NA	NA	NA	NA	NA	NA	NA	NA	NA	NA	NA	NA	1.6425	1.58906	NA	NA
ENSMUSG00000004044	Cavin1	2.3088	2.40548	2.39552	2.46156	2.3181	2.32556	2.57683	2.59694	2.56392	2.6207	2.5594	2.57837	2.20055	2.24219	2.17819	2.12394	2.23927	2.18536	3.03035	2.99766	3.0267	3.01872	3.0189	3.00858	2.88938	2.66441	2.63465	2.73853	2.82092	2.65086	3.26922	3.28022	3.25351	3.279	3.3122	3.47328	2.36993	2.36841	2.57923	2.58616	2.20698	2.18286	3.01823	3.0154	2.72948	2.73677	3.26765	3.35483
ENSMUSG00000004054	Map3k11	3.28874	3.27891	3.31088	3.45198	3.33186	3.3329	4.3078	4.35911	4.26297	4.24854	4.29854	4.35809	3.81148	3.77125	3.69481	3.87369	3.79802	3.87779	4.24475	4.29077	4.19984	4.29434	4.2293	4.27752	4.34808	4.30604	4.30894	4.2558	4.20539	4.21197	3.81558	3.83163	3.86936	3.92561	3.78101	3.87485	3.29284	3.37225	4.30996	4.30172	3.75918	3.84983	4.24512	4.26705	4.32102	4.22438	3.83885	3.86049
ENSMUSG00000004056	Akt2	3.82144	3.85126	3.96795	3.9091	4.01635	3.93785	4.68011	4.6452	4.62048	4.55506	4.64003	4.61921	4.43789	4.35522	4.50891	4.14617	4.32718	4.50972	4.08507	4.07433	4.16866	4.17904	4.12855	4.25135	4.12641	4.22022	4.34369	4.10522	4.16163	4.05726	4.08481	4.02216	4.01107	4.05607	4.07	3.9845	3.88022	3.95443	4.6486	4.60477	4.43401	4.32769	4.10935	4.18631	4.23011	4.10804	4.03935	4.03686
ENSMUSG00000004069	Dnaja3	7.81984	7.69718	7.57963	7.67092	7.59716	7.69045	8.37678	8.39882	8.49364	8.33326	8.40026	8.47919	7.87084	7.80332	7.6658	7.84326	7.82913	7.85766	8.16218	8.1295	8.26951	8.25865	8.18341	8.27035	8.35721	8.22558	8.14262	8.35691	8.37455	8.33684	8.00576	7.97086	7.89272	7.84999	7.91676	7.89917	7.69888	7.65285	8.42308	8.40424	7.77999	7.84335	8.18706	8.23747	8.2418	8.3561	7.95645	7.88864
ENSMUSG00000004070	Hmox2	8.92335	8.97356	8.91481	8.95407	8.92607	8.83716	9.52797	9.47818	9.70281	9.53834	9.58297	9.74438	9.23165	8.93205	9.03822	9.07172	9.0169	9.09637	9.21849	9.25809	9.35111	9.21165	9.32592	9.30519	9.33603	9.37118	9.34195	9.42695	9.50178	9.34163	9.15004	8.99526	9.03439	9.12899	9.16978	9.11185	8.93724	8.90577	9.56966	9.6219	9.06731	9.06166	9.2759	9.28092	9.34972	9.42345	9.0599	9.13687
ENSMUSG00000004071	Cdip1	9.76785	10.0215	9.73729	9.83997	9.88563	9.8598	10.7058	10.5917	10.55	10.6966	10.6434	10.5177	10.3672	10.3058	10.3581	10.3483	10.2738	10.333	10.437	10.5723	10.3999	10.4253	10.4026	10.5898	10.4839	10.5383	10.5612	10.5885	10.7507	10.5527	10.1096	10.1196	10.0856	10.1278	10.254	10.1866	9.84221	9.8618	10.6158	10.6193	10.3437	10.3184	10.4697	10.4725	10.5278	10.6306	10.1049	10.1895
ENSMUSG00000004085	Map3k20	5.80607	5.89862	6.11985	5.72999	5.77785	5.94932	6.82779	6.91127	6.80326	6.80901	6.88301	6.85191	6.49285	6.42986	6.42767	6.47152	6.39138	6.46865	6.67425	6.56645	6.60495	6.72761	6.66803	6.74141	7.31503	7.21003	7.20833	7.19852	7.13006	7.24664	6.68809	6.70958	6.64062	6.61341	6.59669	6.47549	5.94151	5.81905	6.84744	6.84798	6.45013	6.44385	6.61522	6.71235	7.24446	7.19174	6.67943	6.56186
ENSMUSG00000004096	Cwc15	8.45291	8.36837	8.67131	8.43606	8.30481	8.4501	9.23965	9.16065	9.24198	9.26712	9.2225	9.19511	8.88507	8.72732	8.75693	8.56699	8.7139	8.70639	9.02175	8.96215	9.06324	9.1315	9.09262	8.94809	9.33097	9.38698	9.3385	9.28915	9.34725	9.39972	8.78082	8.67119	8.72254	8.7054	8.58919	8.62688	8.49753	8.39699	9.2141	9.22824	8.78977	8.66243	9.01571	9.0574	9.35215	9.34537	8.72485	8.64049
ENSMUSG00000004099	Dnmt1	6.88111	6.88875	6.82366	7.04775	7.0619	7.16038	7.761	7.81784	8.0117	7.78749	7.96106	7.86984	7.29814	7.31578	7.29227	7.32131	7.47287	7.38157	7.15717	7.05591	7.46349	7.4331	7.18184	7.29289	7.50907	7.24609	7.26917	7.38999	7.3935	7.14621	7.71624	7.5043	7.64034	7.49166	7.73829	7.60865	6.86451	7.09001	7.86351	7.8728	7.30206	7.39191	7.22552	7.30261	7.34144	7.3099	7.62029	7.61287
ENSMUSG00000004100	Ppan	4.39175	4.41013	4.33232	4.34304	4.45055	4.18417	5.05287	4.92238	4.94878	5.02885	4.98694	4.9815	4.27319	4.21234	4.15852	4.3138	4.30235	4.23317	4.69439	4.66695	4.70126	4.74682	4.6647	4.72257	4.5193	4.48743	4.38898	4.39925	4.42721	4.39707	4.53468	4.44195	4.57501	4.44996	4.54814	4.6447	4.37807	4.32592	4.97468	4.9991	4.21468	4.2831	4.68753	4.71136	4.46524	4.40784	4.51722	4.5476
ENSMUSG00000004105	Angptl2	3.97489	3.93193	4.14059	3.93598	4.05704	4.05806	4.99449	4.99052	4.80631	4.87693	4.8946	4.93207	4.60774	5.22889	5.04293	4.91498	5.03806	4.79645	4.50406	4.62242	4.55182	4.64091	4.46883	4.48041	5.30846	5.45014	5.52229	5.294	5.41171	5.29969	4.56608	4.53035	4.49949	4.73271	4.78408	4.63499	4.0158	4.01703	4.93044	4.9012	4.95985	4.91649	4.55944	4.53005	5.42696	5.33513	4.53197	4.71726
ENSMUSG00000004110	Cacna1e	7.70171	7.51693	7.82288	7.91356	7.93198	7.86257	8.75411	9.00993	8.59272	8.75955	8.82913	8.65834	8.60161	9.33932	9.14728	8.61975	9.13512	8.86599	8.26588	8.14087	8.05076	8.18767	8.30926	8.14002	8.63545	8.90182	9.10501	8.61885	8.45909	8.69786	8.04636	8.24698	7.99839	8.09111	8.11191	8.0113	7.68051	7.9027	8.78559	8.74901	9.0294	8.87362	8.1525	8.21232	8.88076	8.59193	8.09724	8.07144
ENSMUSG00000004113	Cacna1b	6.91784	7.18231	7.24144	7.24151	7.32256	7.34611	8.26284	8.46352	8.16562	8.21159	8.33707	8.1381	8.23667	8.81537	8.48246	8.24619	8.56288	8.58664	7.73336	7.81925	7.71734	7.78314	7.75829	7.72882	8.17103	8.28805	8.57337	8.03008	8.12748	7.86437	7.50338	7.47914	7.49342	7.47366	7.68895	7.59814	7.11386	7.30339	8.29732	8.22892	8.5115	8.46524	7.75665	7.75675	8.34415	8.00731	7.49198	7.58692
ENSMUSG00000004127	Trmt10a	4.07044	4.01753	3.95921	3.9675	3.99062	4.09718	4.76431	4.72949	4.62942	4.76971	4.74567	4.77584	4.39932	4.46838	4.23506	4.54411	4.52737	4.56535	4.5567	4.52201	4.54975	4.60602	4.49728	4.60956	4.9826	4.99073	4.78037	4.96671	4.86288	4.88686	4.40489	4.41521	4.5306	4.42046	4.49508	4.46785	4.01573	4.01844	4.70774	4.76374	4.36758	4.54561	4.54282	4.57096	4.9179	4.90548	4.45023	4.46113
ENSMUSG00000004151	Etv1	7.26543	7.358	7.61553	7.52297	7.60161	7.63829	8.4926	8.34312	8.22813	8.48588	8.48925	8.36044	7.81333	7.83871	7.91337	7.24351	7.77569	7.79115	7.98573	7.91494	8.10436	8.05342	8.08335	7.93893	7.90713	8.2336	8.21317	8.26804	8.10361	8.18065	7.60611	7.46556	7.62726	7.28087	7.29518	7.48543	7.41299	7.58762	8.35462	8.44519	7.85514	7.60345	8.00168	8.02523	8.11797	8.1841	7.56631	7.35383
ENSMUSG00000004187	Kifc2	6.01805	6.14706	6.02263	6.10778	6.05802	6.16504	6.9654	7.03574	7.04747	7.02948	7.02443	7.01685	6.70733	6.86786	6.79816	6.85678	6.82053	6.7764	6.59657	6.5055	6.59163	6.58469	6.3663	6.44567	6.92764	6.91625	6.82437	6.89121	6.78971	6.84852	6.20675	6.10846	6.17535	6.11373	6.24883	6.31816	6.06258	6.11028	7.0162	7.02358	6.79112	6.8179	6.56457	6.46556	6.88942	6.84315	6.16352	6.2269
ENSMUSG00000004207	Psap	13.792	13.7334	13.8765	13.8518	13.9516	14.0098	15.0448	15.3025	14.9197	15.0584	15.081	15.0045	15.0639	15.8769	15.7098	15.5666	15.544	15.4715	14.7341	14.7944	14.616	14.8123	14.713	14.5342	15.2434	15.4781	15.6709	15.1716	15.1726	15.3237	14.4026	14.6438	14.4429	14.3687	14.3086	14.3338	13.8006	13.9377	15.089	15.048	15.5502	15.5273	14.7148	14.6865	15.4641	15.2227	14.4964	14.337
ENSMUSG00000004221	Ikbkg	6.77403	6.47008	6.38839	6.51844	6.52996	6.52628	7.17632	7.13729	7.20747	7.09745	7.14849	7.12166	6.92927	6.71112	6.8384	6.89007	6.72839	6.71508	7.03307	7.13947	7.17959	7.06249	6.8838	7.11528	7.16221	7.00072	6.9518	7.12271	7.1172	7.00821	6.89569	6.77316	6.85935	6.75356	6.96153	6.82112	6.54417	6.52489	7.17369	7.12253	6.82626	6.77785	7.11738	7.02052	7.03824	7.08271	6.84273	6.8454
ENSMUSG00000004231	Pax2	3.9314	3.81258	3.97319	3.83832	3.89439	3.92044	4.39863	4.37419	4.33313	4.37579	4.37124	4.37976	3.99482	3.94406	4.09367	4.01446	4.05649	4.0578	4.59437	4.58745	4.63485	4.57963	4.56079	4.53283	4.3356	4.43632	4.44081	4.40215	4.38042	4.36333	4.09562	4.03756	4.13234	4.17977	4.14955	4.18976	3.90572	3.88438	4.36865	4.3756	4.01085	4.04292	4.60556	4.55775	4.40424	4.38197	4.08851	4.17303
ENSMUSG00000004233	Wars2	3.86958	3.89948	3.86511	4.02536	3.9667	3.97734	4.7755	4.80005	4.80451	4.8734	4.83766	4.73868	4.13594	4.20683	4.16103	4.19166	4.11523	4.27006	4.75907	4.71335	4.68573	4.73765	4.703	4.66441	4.95468	4.79008	4.89555	4.95533	4.91752	4.86657	4.52409	4.45337	4.50851	4.55911	4.59913	4.63182	3.87805	3.9898	4.79335	4.81658	4.16793	4.19232	4.71938	4.70169	4.8801	4.91314	4.49532	4.59669
ENSMUSG00000004264	Phb2	7.04243	7.05798	6.68331	6.89843	6.99117	7.14531	7.84519	7.76067	7.88633	7.80281	7.8844	7.8106	7.33531	7.29799	7.30471	7.40759	7.43908	7.34427	7.40383	7.37426	7.45482	7.24318	7.4469	7.4281	7.6313	7.53203	7.4725	7.7242	7.62946	7.72587	7.34186	7.21364	7.27048	7.23472	7.34181	7.3914	6.92791	7.01164	7.83073	7.8326	7.31267	7.39698	7.41097	7.37273	7.54528	7.69318	7.27533	7.32264
ENSMUSG00000004267	Eno2	11.5865	11.5729	11.2286	11.3463	11.3896	11.4767	12.0014	11.8687	12.1131	11.9794	11.9521	11.9859	11.6091	11.6106	11.6518	11.6208	11.5982	11.6025	11.7599	11.6921	11.97	11.8099	11.7574	11.9694	11.9733	11.6401	11.6173	11.7541	11.6876	11.6531	12.0433	11.7827	11.8525	11.9335	12.2176	12.1112	11.4627	11.4042	11.9944	11.9725	11.6238	11.6071	11.8073	11.8456	11.7435	11.6983	11.8928	12.0875
ENSMUSG00000004268	Emg1	6.34002	6.11028	6.04822	6.06456	6.11473	6.09174	6.85129	6.72681	6.92027	6.8456	6.68664	6.80932	6.34335	6.41194	6.39525	6.33126	6.47592	6.39821	6.55935	6.50053	6.64808	6.70783	6.52152	6.56805	6.66854	6.78907	6.74694	6.79683	6.73217	6.90926	6.24619	6.17628	6.33921	6.10423	6.16329	6.25859	6.16617	6.09034	6.83279	6.78052	6.38351	6.4018	6.56932	6.59914	6.73485	6.81275	6.25389	6.17537
ENSMUSG00000004270	Lpcat3	4.57712	4.33084	4.50696	4.38382	4.48271	4.3153	5.30952	5.28369	5.23358	5.30232	5.36793	5.34155	5.28212	5.60884	5.37691	5.44009	5.26465	5.31599	4.81009	4.76806	4.78845	4.8037	4.82571	4.79788	5.14182	5.24689	5.3819	5.15709	5.10875	5.17514	4.05085	4.09435	4.05633	4.11308	4.09397	4.0626	4.47164	4.39394	5.2756	5.33727	5.42262	5.34025	4.78887	4.8091	5.25687	5.14699	4.06718	4.08988
ENSMUSG00000004285	Atp6v1f	8.25272	8.43041	8.56124	8.64557	8.68547	8.35407	9.43991	9.44026	9.3751	9.41892	9.58779	9.37014	9.12987	8.99511	9.04134	9.06946	9.22735	9.07337	8.97932	8.91461	8.7367	8.88486	8.97948	8.86361	9.13927	9.3321	9.35238	9.35503	9.37058	9.43563	8.27336	8.52242	8.52146	8.46115	8.36283	8.5738	8.41479	8.5617	9.41842	9.45895	9.05544	9.12339	8.87687	8.90932	9.27458	9.38708	8.43908	8.46593
ENSMUSG00000004317	Clcn5	5.84316	6.01815	6.03739	6.23277	6.10905	6.14583	7.19806	7.41527	7.13526	7.17687	7.25426	7.20802	7.27182	7.85384	7.50033	7.46313	7.48267	7.39202	6.73943	6.64115	6.56803	6.57253	6.64783	6.49821	7.11404	7.20114	7.39825	6.8565	7.06558	6.95909	6.32914	6.21626	6.30518	6.39433	6.45363	6.25437	5.96623	6.16255	7.24953	7.21305	7.542	7.44594	6.64954	6.57286	7.23781	6.96039	6.28353	6.36744
ENSMUSG00000004319	Clcn3	9.77556	9.74775	9.97096	9.85172	9.92939	9.90961	10.9428	11.1626	10.9726	10.973	11.0451	11.0309	10.6915	11.2006	10.9912	11.1123	11.0258	11.1185	10.6252	10.6862	10.427	10.7308	10.719	10.5001	11.045	11.2552	11.368	11.0162	11.1098	11.1386	9.9776	10.1557	10.1494	10.1392	10.0152	9.94766	9.83142	9.89691	11.026	11.0164	10.9611	11.0856	10.5795	10.65	11.2227	11.0882	10.0943	10.034
ENSMUSG00000004341	Gpx6	NA	NA	NA	NA	NA	NA	2.89482	2.98409	2.8845	2.92834	2.93823	2.87192	2.69718	2.84553	2.66102	2.79712	2.6652	2.87859	2.41228	2.35648	2.37669	2.40638	2.41755	2.36091	2.37871	2.38845	2.60153	2.44751	2.39841	2.3962	NA	NA	NA	NA	NA	NA	NA	NA	2.92114	2.91283	2.73458	2.78031	2.38182	2.39495	2.45623	2.41404	NA	NA
ENSMUSG00000004347	Pde1c	7.81611	7.46244	7.4777	7.26065	7.34337	7.47711	7.99567	7.93244	8.02049	7.8914	7.86447	8.08395	7.48022	7.65245	7.23867	7.48762	7.61737	7.94027	7.62051	7.54524	7.74814	7.59162	7.52674	7.42597	7.59705	7.59218	7.70714	7.90885	7.78695	7.695	7.27688	7.54035	7.37938	7.64967	7.62755	7.72311	7.58542	7.36037	7.98287	7.94661	7.45711	7.68175	7.63796	7.51478	7.63212	7.79693	7.39887	7.66678
ENSMUSG00000004356	Utp20	6.03057	6.30205	6.16342	6.30713	6.25349	6.147	6.84825	6.86063	6.8333	6.9146	6.96707	6.77609	6.39106	6.15891	6.11831	6.19415	6.20886	6.22137	6.66224	6.62952	6.68403	6.70663	6.60373	6.80662	6.89199	6.65817	6.62184	6.82289	6.78625	6.57421	6.96774	6.76773	6.91727	6.86341	6.8032	6.88141	6.16535	6.23587	6.84739	6.88592	6.22276	6.20813	6.6586	6.70566	6.724	6.72778	6.88425	6.84934
ENSMUSG00000004360	9330159F19Rik	1.90388	1.99316	1.99745	1.96998	1.91865	1.91619	2.82707	2.77182	2.77027	2.82958	2.75152	2.75894	2.64983	2.66705	2.72583	2.95499	2.76264	2.72109	2.75202	2.73648	2.70081	2.69361	2.69316	2.76279	2.22676	2.18466	2.18816	2.13495	2.17099	2.13694	2.39026	2.38294	2.38024	2.37483	2.43634	2.41008	1.96483	1.93494	2.78972	2.78001	2.6809	2.81291	2.72977	2.71652	2.19986	2.14763	2.38448	2.40708
ENSMUSG00000004364	Cul3	9.84738	9.93892	10.2312	10.0596	9.85743	9.90545	10.6902	10.6815	10.8315	10.7528	10.7061	10.7566	10.2642	10.0386	10.0821	10.12	10.221	10.1094	10.5401	10.4109	10.5634	10.5402	10.6158	10.5361	10.7494	10.7259	10.6209	10.7649	10.7882	10.7424	10.2358	10.2185	10.3085	10.2856	10.1397	10.1819	10.0058	9.94082	10.7344	10.7385	10.1283	10.1501	10.5048	10.564	10.6988	10.7652	10.2543	10.2024
ENSMUSG00000004366	Sst	7.70697	7.78038	7.66111	7.57067	7.65331	7.66023	8.44994	8.3566	8.42497	8.40339	8.30741	8.39042	8.44252	8.55772	8.42768	8.31031	8.49364	8.21042	8.37187	8.33336	8.38324	8.49481	8.3955	8.41358	9.04113	8.54953	8.41301	8.25466	8.41	8.17505	7.98189	7.84475	7.799	7.86464	7.80379	7.8099	7.71615	7.62807	8.4105	8.36707	8.47597	8.33812	8.36282	8.43463	8.66789	8.2799	7.87521	7.82611
ENSMUSG00000004383	Large1	9.46968	9.37436	9.21056	9.28917	9.39055	9.45595	10.2768	10.355	10.3562	10.2761	10.3546	10.4301	10.093	10.5513	10.4635	10.609	10.2884	10.4763	9.85447	10.0961	9.91589	9.95894	9.86722	9.73905	10.0863	10.3054	10.4956	10.1669	10.3451	10.2665	9.1116	9.39409	9.21488	9.12664	9.05936	9.0017	9.35153	9.37855	10.3293	10.3536	10.3693	10.4579	9.9555	9.85507	10.2958	10.2595	9.24019	9.06257
ENSMUSG00000004393	Ddx56	6.93923	6.38701	6.44689	6.44314	6.54714	6.52747	7.15453	7.06212	7.16482	7.11976	7.16685	7.18105	6.70435	6.63755	6.49987	6.68111	6.66856	6.73522	6.87397	6.73961	6.85945	6.72256	6.78456	6.83707	6.64948	6.68659	6.9226	6.80637	6.77816	6.7975	6.79292	6.79344	6.79613	6.65606	6.78694	6.76035	6.59104	6.50592	7.12716	7.15588	6.61392	6.69496	6.82434	6.7814	6.75289	6.79401	6.79416	6.73445
ENSMUSG00000004394	Tmed4	8.20863	8.19278	8.31425	8.14132	8.24684	8.45588	9.21763	9.37651	9.1704	9.21246	9.27281	9.23747	9.17619	9.65331	9.60423	9.48144	9.42829	9.4099	8.85969	8.96899	8.73665	8.877	8.89801	8.81495	9.06653	9.43409	9.52612	9.33246	9.30061	9.28088	8.54843	8.66691	8.57986	8.49649	8.43115	8.43689	8.23855	8.28135	9.25485	9.24091	9.47791	9.43988	8.85511	8.86332	9.34225	9.30465	8.5984	8.45484
ENSMUSG00000004415	Col26a1	NA	NA	NA	NA	NA	NA	2.06262	2.11613	2.09972	2.0948	2.09559	2.07003	NA	NA	NA	NA	NA	NA	NA	NA	NA	NA	NA	NA	NA	NA	NA	NA	NA	NA	NA	NA	NA	NA	NA	NA	NA	NA	2.09282	2.08681	NA	NA	NA	NA	NA	NA	NA	NA
ENSMUSG00000004446	Bid	4.91639	4.64278	4.7584	4.80777	4.7363	4.80823	5.63462	5.67	5.72671	5.61191	5.51954	5.62879	5.20883	5.00237	5.10249	4.98304	4.91484	4.91952	5.57142	5.53578	5.53215	5.52264	5.4942	5.59181	5.68466	5.49962	5.44536	5.37499	5.46435	5.43428	5.55201	5.50886	5.51773	5.65369	5.67431	5.56648	4.77252	4.7841	5.67711	5.58675	5.10457	4.93913	5.54645	5.53622	5.54321	5.42454	5.5262	5.63149
ENSMUSG00000004451	Ralb	6.18889	5.92766	5.75135	5.99472	6.09245	6.10933	6.73514	6.90853	6.83722	6.70792	6.86445	6.82045	6.50623	6.52466	6.6754	6.67045	6.54022	6.61333	6.17911	6.21513	6.44029	6.23909	6.15764	6.24598	6.61655	6.47559	6.51055	6.66943	6.53476	6.69605	6.05173	6.12455	6.09694	5.88334	5.98932	6.11089	5.95596	6.0655	6.82696	6.79761	6.56876	6.608	6.27818	6.21423	6.53423	6.63342	6.09107	5.99452
ENSMUSG00000004455	Ppp1cc	2.94789	2.82978	2.98352	2.74702	2.76485	2.84814	2.96602	3.03288	2.99293	3.00844	2.98369	2.9731	1.69401	1.6362	1.59475	1.609	1.71713	1.71815	NA	NA	NA	NA	NA	NA	2.88201	2.94351	2.94182	2.95589	2.87818	2.92452	NA	NA	NA	NA	NA	NA	2.9204	2.78667	2.99728	2.98841	1.64166	1.68143	NA	NA	2.92244	2.91953	NA	NA
ENSMUSG00000004460	Dnajb11	8.78292	8.64864	8.80406	8.66885	8.72296	8.82146	9.64489	9.81758	9.83742	9.68174	9.73109	9.77941	9.76763	10.4855	10.2212	10.2365	10.2591	9.96499	9.18478	9.25316	9.26691	9.32785	9.03115	9.18299	9.39547	9.31435	9.5848	9.25079	9.30584	9.06857	8.27117	8.31062	8.47583	8.2283	8.18459	8.24997	8.74521	8.73776	9.76663	9.73075	10.1581	10.1535	9.23495	9.18066	9.43154	9.2084	8.35254	8.22095
ENSMUSG00000004462	Tbccd1	4.53423	4.30969	4.26385	4.40287	4.48167	4.30602	4.95153	4.99035	5.0362	5.00582	5.01664	4.99162	4.35668	4.4467	4.36149	4.52535	4.61541	4.48969	4.5888	4.59618	4.52247	4.59197	4.55771	4.65165	4.66141	4.71956	4.70711	4.94729	4.87258	4.69184	4.39204	4.32557	4.29358	4.26281	4.34321	4.39129	4.36926	4.39685	4.99269	5.00469	4.38829	4.54348	4.56915	4.60044	4.69603	4.83723	4.33706	4.33243
ENSMUSG00000004473	Clec11a	2.53097	2.45798	2.45404	2.4805	2.44679	2.5669	3.4505	3.53603	3.4844	3.48124	3.54988	3.513	3.23302	3.26426	3.17725	3.19657	3.33954	3.28141	2.47129	2.45246	2.45133	2.49519	2.50551	2.50752	3.06299	3.13182	3.31558	3.16941	3.13953	3.33954	2.61706	2.59979	2.57802	2.56176	2.51919	2.6006	2.481	2.49807	3.49031	3.51471	3.22484	3.27251	2.45836	2.50274	3.17013	3.21616	2.59829	2.56052
ENSMUSG00000004500	Zfp324	3.05619	3.0478	2.88041	3.02819	2.96371	3.07987	3.6202	3.69014	3.75001	3.65058	3.69542	3.72891	3.15443	3.34491	3.28623	3.24116	3.27731	3.23053	3.11532	3.09714	3.08396	3.10413	3.06014	3.18249	3.63775	3.41762	3.40779	3.39054	3.42369	3.39984	3.12993	3.15463	3.1142	3.16441	3.10998	3.19078	2.9948	3.02392	3.68679	3.69164	3.26186	3.24967	3.0988	3.11559	3.48772	3.40469	3.13292	3.15506
ENSMUSG00000004508	Gab2	4.64947	4.8808	4.5615	4.64677	4.69052	4.72265	5.47361	5.39285	5.51555	5.39288	5.48345	5.47528	5.10212	5.14933	5.40515	5.35243	5.23158	5.1215	5.24359	5.14785	5.22505	5.1048	5.14359	5.23364	5.31285	5.05954	5.07109	5.14059	5.16463	5.15601	5.37099	5.42694	5.40396	5.48349	5.46802	5.56547	4.69726	4.68665	5.46067	5.45054	5.21886	5.23517	5.20549	5.16068	5.14783	5.15374	5.40063	5.50566
ENSMUSG00000004530	Coro1c	8.07626	7.898	7.76194	7.7195	7.77896	7.70356	8.33382	8.26882	8.41179	8.30025	8.34872	8.2513	7.87981	7.8487	7.72753	7.8923	7.79587	7.74478	7.9569	8.01047	8.1531	8.05221	7.99743	8.07267	8.31105	8.11455	8.28392	8.26678	8.20643	8.21746	8.10021	8.09553	8.07528	8.08752	8.15669	8.28341	7.91207	7.73401	8.33815	8.30009	7.81868	7.81098	8.04016	8.04077	8.23651	8.23022	8.09034	8.17587
ENSMUSG00000004535	Tax1bp1	9.32234	9.58103	9.71039	9.55416	9.44516	9.44368	10.2669	10.2387	10.2429	10.2878	10.2709	10.2705	10.023	10.1268	10.1753	10.1875	10.1072	10.1021	10.2409	10.1977	10.2711	10.2672	10.3681	10.3567	10.6718	10.5917	10.5115	10.4968	10.5682	10.5946	10.5261	10.5043	10.4683	10.6007	10.5197	10.5031	9.53792	9.481	10.2495	10.2764	10.1084	10.1323	10.2365	10.3306	10.5917	10.5532	10.4996	10.5412
ENSMUSG00000004558	Ndrg2	8.32324	8.39088	8.26147	8.23524	8.20813	8.3956	9.10842	8.88812	9.08562	9.10971	9.04084	8.93026	8.53582	8.49987	8.07659	8.44751	8.27675	8.27045	8.84565	8.81461	8.92927	8.8354	8.86088	8.8955	8.71058	8.54394	8.58934	8.75304	8.88597	8.53982	8.79204	8.48882	8.70951	8.78274	8.98558	8.92752	8.3252	8.27965	9.02739	9.02693	8.37076	8.33157	8.86318	8.86393	8.61462	8.72628	8.66346	8.89862
ENSMUSG00000004561	Mettl17	4.67617	4.49924	4.34664	4.46049	4.44382	4.48741	5.11899	5.00818	5.13453	5.1155	5.04605	5.14197	4.7017	4.71718	4.73485	4.90696	4.96143	4.82435	4.54728	4.55115	4.60326	4.5389	4.51273	4.522	4.61674	4.66546	4.58347	4.61633	4.64278	4.60217	4.19436	4.14231	4.16334	4.21005	4.21229	4.22941	4.50735	4.46391	5.08723	5.10117	4.71791	4.89758	4.56723	4.52454	4.62189	4.62043	4.16667	4.21725
ENSMUSG00000004562	Arhgef40	5.05169	4.95134	4.95328	4.91486	5.03526	4.97296	5.42429	5.44082	5.55166	5.40517	5.53129	5.52673	4.83309	4.58366	4.77354	4.84072	4.77928	4.75016	4.91084	4.93834	5.00307	4.92067	4.96889	4.95224	5.09548	5.06548	5.02779	5.18641	5.16199	5.18318	5.26941	5.12422	5.18993	5.15576	5.3607	5.34465	4.98544	4.97436	5.47226	5.48773	4.73009	4.79005	4.95075	4.94727	5.06292	5.17719	5.19452	5.28704
ENSMUSG00000004565	Pnpla6	7.82261	7.42741	7.48899	7.54132	7.47342	7.51133	8.47635	8.55411	8.47831	8.43053	8.55843	8.44584	8.30983	8.60594	8.39203	8.36513	8.53541	8.41426	8.00154	8.01233	7.89871	8.0436	7.848	7.92101	8.22011	8.11198	8.21671	7.95393	7.96114	7.85265	7.66719	7.62056	7.61481	7.55267	7.68402	7.68353	7.57967	7.50869	8.50292	8.47827	8.43593	8.43827	7.97086	7.93754	8.18294	7.92257	7.63419	7.64007
ENSMUSG00000004567	Mcoln1	8.02704	8.26039	8.07451	8.21553	8.33006	8.36779	9.30323	9.4402	9.37958	9.27612	9.42767	9.36505	9.28668	9.8712	9.69291	9.61709	9.59745	9.5891	8.90623	9.0727	8.95095	8.9183	8.7747	8.79513	9.41398	9.31648	9.44227	9.16106	9.2421	9.19823	8.45671	8.55056	8.49852	8.40346	8.3839	8.45318	8.12065	8.30446	9.37434	9.35628	9.61693	9.60121	8.97663	8.82938	9.39091	9.20046	8.50193	8.41352
ENSMUSG00000004568	Arhgef18	6.908	6.87126	6.8537	6.97603	6.98228	6.90358	7.80551	7.68846	7.77602	7.74171	7.77262	7.71778	7.27753	7.1323	7.1281	7.20624	7.15741	7.22035	7.44455	7.46886	7.65578	7.41686	7.36507	7.46909	7.59004	7.44204	7.3288	7.54969	7.5696	7.33168	7.34355	7.0673	7.35516	7.28845	7.37474	7.43263	6.87766	6.95397	7.75666	7.74404	7.17931	7.19467	7.52306	7.41701	7.45363	7.48366	7.25534	7.36528
ENSMUSG00000004591	Pkn2	6.2418	6.50723	6.51152	6.32318	6.25978	6.29419	7.46804	7.37932	7.48336	7.37364	7.36187	7.48253	6.97104	7.13082	6.9776	7.24668	6.93357	7.04833	7.10906	7.14057	7.15702	7.14921	7.15259	7.17725	7.07559	7.29302	7.29731	7.26856	7.39897	7.27923	6.67633	6.68268	6.77048	6.73501	6.61869	6.58316	6.42018	6.29239	7.44357	7.40601	7.02648	7.07619	7.13555	7.15969	7.22197	7.31559	6.70983	6.64562
ENSMUSG00000004610	Etfb	4.71334	4.33345	4.31438	4.22278	4.15478	4.24785	4.95062	4.86481	5.01797	4.93205	4.9563	4.87464	3.97154	3.71148	3.81573	3.82109	3.74897	3.71808	4.52258	4.4833	4.64682	4.58632	4.61232	4.55016	4.43521	4.4729	4.34692	4.34457	4.39806	4.40038	4.31099	4.31006	4.35868	4.25923	4.41881	4.24047	4.45372	4.20847	4.94447	4.921	3.83292	3.76271	4.5509	4.58294	4.41834	4.381	4.32658	4.30617
ENSMUSG00000004626	Stxbp2	2.59852	2.4082	2.41882	2.42114	2.46382	2.5983	3.40446	3.43828	3.47817	3.40675	3.4339	3.36621	2.69664	2.63988	2.69678	2.7795	2.78412	2.69253	3.28617	3.23445	3.33026	3.30982	3.23496	3.34498	3.66191	3.64354	3.63717	3.64992	3.63744	3.71896	3.02082	3.016	3.03173	3.06909	3.12417	3.06223	2.47518	2.49442	3.4403	3.40228	2.67777	2.75205	3.28363	3.29659	3.64754	3.66878	3.02285	3.08516
ENSMUSG00000004630	Pcp2	12.495	12.4752	12.3423	12.2017	12.4059	12.3011	12.9675	12.9998	13.1364	12.9871	13.0764	13.1705	12.653	12.9127	12.9385	13.3157	12.8342	12.9429	12.5532	12.6479	12.7605	12.5635	12.5453	12.6012	12.3899	12.7654	13.0043	12.867	12.9181	12.9677	12.1283	12.3694	12.241	12.0441	12.2897	12.1672	12.4375	12.3029	13.0346	13.078	12.8347	13.031	12.6539	12.57	12.7199	12.9176	12.2462	12.167
ENSMUSG00000004631	Sgce	6.90775	6.81784	7.04837	7.15174	7.03199	7.01689	8.13953	8.22552	7.94446	8.20988	8.12031	8.0584	8.06543	8.56524	8.39559	8.10966	8.37435	8.26481	7.8914	7.88271	7.65638	7.82618	7.82094	7.82301	8.15076	8.36209	8.48815	8.25077	8.20898	8.20098	7.13623	7.40948	7.34634	7.3452	7.19519	7.41112	6.92466	7.06687	8.10317	8.12953	8.34209	8.24961	7.81016	7.82338	8.33367	8.22024	7.29735	7.31717
ENSMUSG00000004633	Chn2	9.96936	9.54383	9.86711	9.8054	9.89003	9.92006	10.6652	10.4712	10.5344	10.672	10.5494	10.3981	9.99442	9.80396	9.89759	9.25115	9.86344	9.88223	10.1226	10.032	10.3092	10.2499	10.3167	10.1295	10.2018	10.4331	10.3571	10.4954	10.3527	10.3936	9.73106	9.7217	9.89315	9.4983	9.59355	9.45	9.79343	9.87183	10.5569	10.5398	9.89865	9.6656	10.1546	10.232	10.3307	10.4139	9.78197	9.51395
ENSMUSG00000004637	Wwox	6.67273	6.80421	6.57309	6.62078	6.73166	6.69742	7.2729	7.38553	7.51816	7.30869	7.36239	7.43284	7.10366	7.09382	7.27637	7.31193	7.21794	7.3487	7.11802	7.14034	7.22825	7.29934	7.15991	7.23455	7.41353	7.40915	7.51644	7.47356	7.4703	7.44688	7.16764	7.01021	6.98769	7.09247	7.22939	7.04632	6.68334	6.68329	7.39219	7.36797	7.15795	7.29286	7.1622	7.23127	7.44637	7.46358	7.05518	7.12273
ENSMUSG00000004642	Slbp	7.8692	7.80062	7.97676	7.81889	7.69911	7.74652	8.39729	8.32261	8.38624	8.37191	8.35363	8.42164	8.08351	7.98436	8.13714	8.15616	7.98155	8.00738	8.26906	8.25817	8.2716	8.23337	8.26854	8.36661	8.50262	8.426	8.31336	8.38436	8.42964	8.45094	8.0081	7.84542	7.96929	7.79848	7.83766	7.8383	7.88219	7.75484	8.36871	8.38239	8.06834	8.04837	8.26628	8.28951	8.41399	8.42164	7.94094	7.82481
ENSMUSG00000004661	Arid3b	NA	NA	NA	NA	NA	NA	1.77691	1.78099	1.72534	1.73273	1.7332	1.71732	2.23393	2.12732	2.30256	2.19171	2.10323	2.05802	NA	NA	NA	NA	NA	NA	2.35328	2.33439	2.33631	2.30146	2.35319	2.31549	NA	NA	NA	NA	NA	NA	NA	NA	1.76108	1.72775	2.22127	2.11765	NA	NA	2.34133	2.32338	NA	NA
ENSMUSG00000004667	Polr2e	7.33512	7.35363	7.32501	7.33764	7.43161	7.49195	8.0369	8.08031	8.21588	8.10947	8.23308	8.12709	7.73223	7.67834	7.61385	7.83516	7.72077	7.69345	7.59551	7.61515	7.78374	7.72791	7.5891	7.77733	7.70192	7.66257	7.81126	7.76851	7.74093	7.70881	7.44965	7.4121	7.50681	7.50261	7.62605	7.47867	7.33792	7.4204	8.11103	8.15655	7.67481	7.74979	7.6648	7.69811	7.72525	7.73942	7.45619	7.53578
ENSMUSG00000004668	Abca13	NA	NA	NA	NA	NA	NA	NA	NA	NA	NA	NA	NA	1.64906	1.69921	1.64922	1.57084	1.76166	1.73473	NA	NA	NA	NA	NA	NA	1.95521	1.89659	2.01708	1.9327	1.96769	1.87146	NA	NA	NA	NA	NA	NA	NA	NA	NA	NA	1.66583	1.68908	NA	NA	1.95629	1.92395	NA	NA
ENSMUSG00000004677	Myo9b	3.05501	3.00923	2.96302	3.02707	3.02373	2.97007	3.85696	3.94577	3.85524	3.81964	3.855	3.86603	3.57053	3.51803	3.46191	3.47047	3.57743	3.60408	4.02773	3.98009	4.06507	3.93297	3.98535	3.95679	3.62588	3.73727	3.63735	3.63559	3.53113	3.68177	3.5377	3.52638	3.55003	3.49635	3.57426	3.53643	3.00908	3.00696	3.88599	3.84689	3.51682	3.55066	4.0243	3.95837	3.66683	3.61616	3.53804	3.53568
ENSMUSG00000004698	Hdac9	6.81038	6.67839	6.86324	6.85456	6.89783	6.71352	7.46559	7.50557	7.58353	7.56296	7.58528	7.56736	7.22621	7.06906	7.0289	7.3324	7.2673	7.04161	7.52514	7.46204	7.50667	7.60144	7.45806	7.48589	7.67306	7.65343	7.53849	7.64058	7.64147	7.67413	7.10803	7.11699	7.08834	7.00588	7.00583	7.15512	6.78401	6.82197	7.51823	7.57187	7.10806	7.21377	7.49795	7.51513	7.62166	7.65206	7.10445	7.05561
ENSMUSG00000004730	Adgre1	NA	NA	NA	NA	NA	NA	NA	NA	NA	NA	NA	NA	NA	NA	NA	NA	NA	NA	NA	NA	NA	NA	NA	NA	NA	NA	NA	NA	NA	NA	2.44752	2.42377	2.54727	2.48555	2.55656	2.44718	NA	NA	NA	NA	NA	NA	NA	NA	NA	NA	2.47286	2.49643
ENSMUSG00000004748	Mtfp1	7.63656	7.68937	7.50393	7.58311	7.64732	7.77391	8.48408	8.44075	8.49298	8.50989	8.48176	8.49723	7.92602	7.73671	7.78421	7.83005	7.82037	7.79202	8.19313	8.15318	8.22453	8.16775	8.02692	8.23044	8.2612	8.08851	8.00711	8.1593	8.18707	8.083	7.83762	7.73948	7.81548	7.85649	7.9522	8.0017	7.60996	7.66811	8.4726	8.49629	7.81565	7.81415	8.19028	8.1417	8.11894	8.14312	7.79753	7.9368
ENSMUSG00000004768	Rab23	5.64618	5.5932	5.69018	5.67559	5.74313	5.798	6.61425	6.64585	6.80928	6.64367	6.64315	6.61711	6.16425	5.90976	6.09372	6.195	6.07131	6.18793	6.33175	6.3362	6.41429	6.25551	6.42041	6.26207	6.4542	6.42419	6.38163	6.44992	6.62004	6.42573	6.0373	5.99289	6.03277	6.09901	6.05256	5.97713	5.64319	5.73891	6.68979	6.63464	6.05591	6.15141	6.36074	6.31266	6.42001	6.49856	6.02099	6.0429
ENSMUSG00000004771	Rab11a	9.68499	9.96588	10.0113	10.1271	9.96379	9.92901	10.9106	10.7536	10.7912	10.8873	10.8595	10.8138	10.542	10.3359	10.4389	10.3626	10.5182	10.4526	10.8363	10.802	10.6567	10.6563	10.8327	10.803	10.8072	10.8792	10.7882	10.9006	10.9459	10.9301	10.3678	10.2599	10.3579	10.5994	10.3214	10.2934	9.88738	10.0066	10.8185	10.8535	10.4389	10.4444	10.765	10.764	10.8249	10.9256	10.3286	10.4047
ENSMUSG00000004788	Eif2b2	6.86334	6.86093	6.35348	6.75801	6.56582	6.85613	7.14484	6.98534	7.26963	7.08621	7.03304	7.12754	6.66247	6.59	6.90056	6.76299	6.74982	6.65087	6.80021	6.75274	6.92752	6.65188	6.75581	6.89067	6.8285	6.63335	6.67711	6.68769	6.65091	6.70509	6.78472	6.63638	6.75396	6.68887	6.72647	6.85303	6.69259	6.72665	7.13327	7.08226	6.71768	6.72123	6.82682	6.76612	6.71298	6.68123	6.72502	6.75612
ENSMUSG00000004789	Dlst	8.64515	9.01158	8.90135	8.80866	8.76795	8.76836	9.65918	9.55562	9.62561	9.70043	9.58012	9.51207	9.15526	9.00858	8.88749	9.11238	9.10442	9.03721	9.55893	9.55646	9.5151	9.48617	9.54802	9.59848	9.71851	9.50613	9.52796	9.6344	9.6567	9.63462	9.56833	9.58419	9.44273	9.63696	9.50026	9.45551	8.85269	8.78166	9.61347	9.59754	9.01711	9.08467	9.54349	9.54423	9.5842	9.6419	9.53175	9.53091
ENSMUSG00000004791	Pgf	2.87972	2.92613	2.91252	2.88082	2.88439	2.88567	3.92203	3.81211	3.89499	3.88775	3.79851	3.8468	3.611	3.61633	3.55628	3.45866	3.60454	3.55231	3.4636	3.5075	3.48108	3.43713	3.39851	3.41611	3.5321	3.52164	3.73734	3.48155	3.54464	3.69105	3.3116	3.38932	3.34165	3.35779	3.34054	3.31393	2.90612	2.88362	3.87638	3.84435	3.59453	3.5385	3.48406	3.41725	3.59703	3.57241	3.34752	3.33742
ENSMUSG00000004798	Ulk2	6.51971	6.46313	6.4399	6.54936	6.60694	6.37368	7.43989	7.48482	7.30788	7.36031	7.38952	7.33879	7.03707	7.07506	7.03876	7.00061	7.14088	7.15551	7.08	7.10469	6.94179	7.09223	7.23801	7.05675	7.1293	7.28744	7.36009	7.2704	7.22286	7.10199	6.56607	6.66172	6.63681	6.63706	6.72615	6.5628	6.47425	6.50999	7.41087	7.36287	7.0503	7.099	7.04216	7.12899	7.25895	7.19841	6.62153	6.642
ENSMUSG00000004815	Dgkq	6.06568	6.04568	5.81778	6.10252	6.03735	6.12822	6.57198	6.57563	6.70226	6.46458	6.63168	6.51577	6.14651	6.10331	6.1238	5.96939	5.97968	6.16368	6.34759	6.28382	6.41423	6.33514	6.28893	6.34873	6.53935	6.35142	6.28511	6.31258	6.31185	6.24995	6.45269	6.25533	6.28551	6.34865	6.43097	6.40247	5.97638	6.08936	6.61663	6.53734	6.12454	6.03758	6.34854	6.32427	6.39196	6.29146	6.33118	6.39403
ENSMUSG00000004843	Chmp2b	8.22173	8.29878	8.58525	8.26777	8.12626	8.23487	9.05158	9.08497	9.03104	9.07691	8.99121	9.10659	8.66693	8.3572	8.37841	8.51495	8.34724	8.40192	8.97079	8.93019	8.90103	9.08865	8.91871	8.96378	9.24891	9.29093	9.13371	9.27915	9.33019	9.3208	8.54738	8.59508	8.58284	8.49336	8.41449	8.35337	8.36858	8.20964	9.05586	9.05824	8.46751	8.42137	8.934	8.99038	9.22452	9.31005	8.5751	8.42041
ENSMUSG00000004846	Plod3	6.31468	6.17717	6.22078	6.15542	6.30261	6.20459	7.30607	7.50268	7.21389	7.31664	7.31682	7.18637	7.43817	8.22556	7.93205	7.81689	7.89853	7.75973	6.97408	7.02088	6.81058	7.02489	6.86277	6.93358	7.36943	7.55887	7.75016	7.33789	7.36757	7.28625	6.56006	6.58909	6.53451	6.39987	6.51433	6.46391	6.23754	6.22087	7.34088	7.27328	7.86526	7.82505	6.93518	6.94042	7.55949	7.33057	6.56122	6.45937
ENSMUSG00000004849	Ap1s1	8.10295	8.03688	7.92242	8.06442	8.12478	8.02418	8.81582	8.77335	8.81496	8.8755	8.83549	8.85219	8.43824	8.52606	8.4506	8.58981	8.46123	8.46967	8.63276	8.66973	8.70562	8.58542	8.58012	8.5761	8.78101	8.84096	8.91125	8.82561	8.77089	8.90127	8.47713	8.46586	8.42113	8.42205	8.41558	8.44284	8.02075	8.07113	8.80138	8.85439	8.47163	8.5069	8.66937	8.58055	8.84441	8.83259	8.45471	8.42682
ENSMUSG00000004864	Mapk13	3.38291	3.12813	3.28281	3.17979	3.17852	3.12866	3.84111	3.85393	3.78611	3.85147	3.79636	3.84475	3.72244	3.70197	3.75567	3.74365	3.78612	3.86915	3.79712	3.80811	3.79823	3.76884	3.70547	3.7708	4.35737	4.43877	4.43131	4.32901	4.44364	4.37639	3.53636	3.62791	3.70173	3.66856	3.69562	3.58072	3.26462	3.16232	3.82705	3.83086	3.7267	3.79964	3.80115	3.74837	4.40915	4.38301	3.622	3.6483
ENSMUSG00000004865	Srpk1	7.12945	7.18161	7.17904	6.94574	6.95843	6.90752	7.53083	7.45453	7.54097	7.55048	7.40087	7.44304	7.20604	7.22414	7.25881	7.19463	7.1628	7.19885	7.47569	7.42541	7.44308	7.52806	7.46799	7.48622	7.75035	7.57382	7.48924	7.63516	7.58215	7.50338	7.26045	7.16998	7.2037	7.20023	7.16112	7.24688	7.16336	6.93723	7.50878	7.46479	7.22966	7.18543	7.44806	7.49409	7.60447	7.57356	7.21138	7.20274
ENSMUSG00000004880	Lbr	4.98555	5.0042	4.96711	5.09899	4.99031	4.94207	5.83507	5.93428	5.92882	5.83607	5.81969	5.84569	5.68405	6.02704	5.72637	5.75612	5.60185	5.75965	5.39847	5.42002	5.36074	5.48741	5.37947	5.44468	5.82054	5.8351	5.95986	5.83837	5.79604	5.78488	5.38078	5.40252	5.35583	5.28013	5.31997	5.24761	4.98562	5.01045	5.89939	5.83382	5.81249	5.70587	5.39308	5.43719	5.87183	5.80643	5.37971	5.28257
ENSMUSG00000004891	Nes	NA	NA	NA	NA	NA	NA	NA	NA	NA	NA	NA	NA	NA	NA	NA	NA	NA	NA	NA	NA	NA	NA	NA	NA	NA	NA	NA	NA	NA	NA	2.10254	2.06375	2.06862	2.12765	2.13783	2.15067	NA	NA	NA	NA	NA	NA	NA	NA	NA	NA	2.07831	2.13872
ENSMUSG00000004892	Bcan	8.1132	8.10816	7.87321	7.95752	8.10128	8.03392	9.11327	9.26143	9.01086	9.10982	9.1244	9.19308	9.16884	9.64236	9.52228	9.5892	9.29829	9.42829	8.74144	8.714	8.67488	8.68822	8.51558	8.63353	9.08895	9.24552	9.43095	9.13429	9.17214	9.11847	8.45739	8.51182	8.31942	8.39743	8.35667	8.38384	8.03152	8.03091	9.12852	9.14244	9.44449	9.43859	8.71011	8.61245	9.25514	9.14163	8.42954	8.37932
ENSMUSG00000004894	Hapln2	NA	NA	NA	NA	NA	NA	2.89548	2.90316	2.9023	2.88359	2.87555	2.92478	2.28066	2.504	2.32475	2.45541	2.39291	2.39997	1.86978	1.83813	1.82965	1.88055	1.88582	1.84662	2.00324	2.10024	2.0289	2.06213	1.99396	2.05823	1.86531	1.84131	1.83213	1.85013	1.90063	1.88058	NA	NA	2.90032	2.89464	2.3698	2.4161	1.84585	1.871	2.04412	2.03811	1.84625	1.87711
ENSMUSG00000004895	Prcc	6.41062	6.49855	6.44296	5.94885	6.10021	6.01009	6.8661	6.67601	6.79642	6.80299	6.76622	6.69956	6.25414	6.29005	6.38751	6.3132	6.21043	6.31045	6.95178	6.76034	7.10383	6.91747	6.8796	6.79355	7.15635	7.26306	7.20872	7.16271	7.05695	7.19445	6.93597	6.88195	6.77785	6.69341	6.95141	6.61474	6.45071	6.01972	6.77951	6.75626	6.31057	6.27802	6.93865	6.86354	7.20938	7.13804	6.86526	6.75319
ENSMUSG00000004896	Rrnad1	4.51694	4.39036	4.35546	4.51528	4.44493	4.56465	5.30725	5.1468	5.25679	5.22087	5.28229	5.24479	4.77794	5.02523	4.77339	4.82665	4.67336	4.87512	5.06032	5.14953	5.1791	5.13501	5.1115	5.21717	4.9114	4.96705	5.13399	4.98294	4.96543	4.98069	4.73148	4.75847	4.73269	4.77578	4.75475	4.98023	4.42092	4.50829	5.23695	5.24931	4.85885	4.79171	5.12965	5.15456	5.00415	4.97635	4.74088	4.83692
ENSMUSG00000004897	Hdgf	7.79854	7.65871	7.76688	7.55528	7.59557	7.54013	8.25835	8.23719	8.25474	8.2402	8.22675	8.30982	7.94169	7.87393	7.97466	7.86803	7.8885	7.8523	7.96542	7.84955	8.10286	8.04262	7.9524	7.87078	8.16117	8.33471	8.31848	8.35431	8.18283	8.33165	7.98925	7.90415	7.87515	7.60214	7.73437	7.8668	7.74137	7.56366	8.25009	8.25892	7.9301	7.86961	7.97261	7.95527	8.27146	8.2896	7.92285	7.73443
ENSMUSG00000004902	Slc25a18	4.26259	4.1479	4.14441	4.06937	3.97508	3.97939	4.58345	4.52504	4.46	4.56371	4.58139	4.53049	3.97859	3.93396	3.67832	3.75772	3.85551	3.74036	4.07315	4.06508	4.08592	4.09058	4.08782	4.03008	4.05618	4.03078	4.06731	4.15548	4.20717	4.00331	4.4632	4.45953	4.48619	4.56789	4.82586	4.61477	4.18497	4.00795	4.52283	4.55853	3.86362	3.78453	4.07472	4.06949	4.05142	4.12199	4.46964	4.66951
ENSMUSG00000004929	Thop1	6.40413	6.50317	6.05613	6.20814	6.37423	6.3153	6.88254	6.91837	7.02396	6.85527	6.93626	6.94808	6.35777	6.28638	6.395	6.43625	6.49012	6.38791	6.62056	6.56524	6.70545	6.51782	6.54125	6.84565	6.59693	6.3751	6.35465	6.43595	6.45948	6.39155	6.51886	6.53115	6.58982	6.40582	6.6167	6.5906	6.32114	6.29922	6.94162	6.9132	6.34639	6.43809	6.63042	6.63491	6.44223	6.42899	6.54661	6.53771
ENSMUSG00000004931	Apba3	3.69102	3.66288	3.53906	3.55735	3.52641	3.56785	4.31551	4.3292	4.25403	4.27916	4.29733	4.29795	3.98689	4.22692	4.08917	4.12234	4.13482	4.20734	3.82207	3.81613	3.8287	3.79085	3.80966	3.86717	4.03248	3.96786	4.01961	4.08223	3.89263	4.08071	3.62201	3.54314	3.69793	3.64139	3.73514	3.54644	3.63099	3.55054	4.29958	4.29148	4.10099	4.15483	3.8223	3.82256	4.00665	4.01852	3.62103	3.64099
ENSMUSG00000004933	Matk	4.75086	4.68723	4.59311	4.70273	4.69349	4.62938	5.34938	5.30943	5.39699	5.32816	5.33912	5.31406	4.94971	4.77073	4.77853	4.7536	5.05531	4.88515	5.13614	5.19848	5.23018	5.14955	5.08991	5.09015	5.26032	5.06343	5.13686	5.03032	5.0448	5.0587	5.1211	5.14744	5.0697	5.00559	5.11483	4.95745	4.67706	4.6752	5.35193	5.32712	4.83299	4.89802	5.18827	5.10987	5.15354	5.04461	5.11275	5.02596
ENSMUSG00000004934	Pias4	5.53031	5.51633	5.42646	5.33229	5.5961	5.60996	6.33705	6.28157	6.35365	6.28684	6.27976	6.22048	5.60878	5.32407	5.308	5.49936	5.45016	5.58365	6.03754	6.11804	6.23028	6.07379	6.07788	6.19047	6.23172	5.95316	6.02103	6.13361	5.99216	5.95638	5.94782	5.83406	5.8128	5.90368	5.93604	5.94968	5.49103	5.51278	6.32409	6.26236	5.41362	5.51106	6.12862	6.11405	6.06864	6.02738	5.86489	5.9298
ENSMUSG00000004936	Map2k1	9.52438	9.23749	9.05454	9.03508	9.02925	9.04517	9.7753	9.57431	9.72499	9.70989	9.68518	9.6939	9.25167	9.0108	9.07596	9.15558	8.97011	9.1605	9.54141	9.45319	9.84405	9.55401	9.52322	9.63513	9.67882	9.49567	9.44494	9.67384	9.76107	9.60377	9.4205	9.29685	9.38555	9.33179	9.40675	9.37913	9.27214	9.0365	9.69153	9.69632	9.11281	9.0954	9.61288	9.57079	9.53981	9.67956	9.36763	9.37256
ENSMUSG00000004937	Sgta	8.48515	8.29325	7.95997	8.09667	8.25124	8.12908	8.79749	8.5514	8.79117	8.71214	8.7218	8.68063	8.33197	8.23641	8.50615	8.24321	8.30914	8.22895	8.41689	8.54177	8.85124	8.35725	8.45158	8.59651	8.67196	8.37485	8.40821	8.43538	8.44105	8.44836	8.4909	8.36622	8.40037	8.30002	8.58254	8.50781	8.24612	8.159	8.71335	8.70486	8.35818	8.26043	8.6033	8.46845	8.48501	8.4416	8.41916	8.46345
ENSMUSG00000004945	Tmem242	6.35889	6.44771	6.36691	6.31173	6.3343	6.13419	7.20916	7.15569	7.02821	7.22359	7.1432	7.07599	7.06113	6.83783	7.06431	7.05437	6.98261	7.12079	7.15737	7.14685	6.94881	6.91806	7.11983	7.14568	7.23767	7.42375	7.4882	7.37764	7.38083	7.52652	6.63049	6.65295	6.54492	6.63016	6.75732	6.73909	6.39117	6.26008	7.13102	7.14759	6.98776	7.05259	7.08434	7.06119	7.3832	7.42833	6.60945	6.70885
ENSMUSG00000004947	Dtx2	3.07491	3.08452	3.03549	2.97276	3.00073	3.00419	3.60769	3.60955	3.68299	3.70204	3.63769	3.6821	3.54677	3.64009	3.48244	3.7247	3.60708	3.57757	3.17085	3.10724	3.13106	3.09932	3.11365	3.13457	3.44134	3.48675	3.43526	3.46346	3.45051	3.47673	3.4285	3.38003	3.35989	3.31227	3.38231	3.38912	3.06497	2.99256	3.63341	3.67394	3.55643	3.63645	3.13638	3.11584	3.45445	3.46357	3.38947	3.36124
ENSMUSG00000004951	Hspb1	1.91746	1.89586	1.85523	1.84742	1.87158	1.94395	2.41869	2.37673	2.43224	2.38998	2.4003	2.42283	2.11076	2.31186	2.12931	2.40163	2.18512	2.21364	1.45385	1.40358	1.39919	1.43011	1.38597	1.4546	2.10124	2.0402	2.03615	2.12043	2.05379	2.05331	1.99827	1.98738	2.01793	2.02429	2.08618	2.05771	1.88951	1.88765	2.40922	2.40437	2.18398	2.2668	1.41887	1.42356	2.05919	2.07584	2.00119	2.05606
ENSMUSG00000004952	Rasa4	3.9713	4.1371	4.01078	3.99341	3.99872	4.18169	4.60724	4.72047	4.63368	4.60822	4.62636	4.72821	4.20677	4.10488	3.998	4.2364	4.03311	4.18337	4.28769	4.26435	4.25338	4.29082	4.27303	4.34294	4.13588	4.22163	4.2789	4.25144	4.31594	4.30401	4.40242	4.43794	4.33696	4.37322	4.51825	4.40475	4.03973	4.05794	4.6538	4.65426	4.10322	4.15096	4.26847	4.30226	4.21214	4.29046	4.39244	4.43207
ENSMUSG00000004961	Syt5	5.95892	5.63998	5.70081	5.65555	5.68692	5.74417	6.42963	6.52881	6.67255	6.57264	6.55983	6.48122	6.59409	6.53078	6.36788	6.23102	6.42419	6.46182	5.92855	5.89963	5.99742	5.90814	5.86787	6.00784	5.94755	5.86149	5.9226	5.80412	5.88655	5.65929	5.63621	5.45625	5.58886	5.57369	5.7058	5.6553	5.76657	5.69554	6.54366	6.5379	6.49759	6.37234	5.94187	5.92795	5.91055	5.78332	5.56044	5.64493
ENSMUSG00000004980	Hnrnpa2b1	10.5341	10.6378	10.9537	10.6147	10.41	10.4158	11.2961	11.0967	11.2063	11.351	11.1184	11.2393	10.979	10.9825	11.0852	10.9287	10.9285	10.9518	11.1626	11.172	11.1857	11.1843	11.2637	11.2145	11.2621	11.1534	11.1288	11.2376	11.2096	11.2365	10.9356	10.9017	10.9547	10.8959	10.7037	10.8535	10.7085	10.4802	11.1997	11.2362	11.0156	10.9363	11.1734	11.2208	11.1814	11.2279	10.9307	10.8177
ENSMUSG00000004994	Ccdc130	4.0653	4.32221	4.06963	4.07818	4.10398	4.0734	4.7238	4.65082	4.77426	4.68236	4.75165	4.82213	3.97569	3.91885	3.91167	4.07482	3.89216	3.92114	4.7185	4.59669	4.69323	4.68688	4.63337	4.64199	4.57376	4.54645	4.55455	4.64336	4.48083	4.61117	4.35782	4.44991	4.23795	4.41557	4.45611	4.31609	4.15238	4.08518	4.71629	4.75205	3.9354	3.96271	4.66947	4.65408	4.55826	4.57845	4.34856	4.39592
ENSMUSG00000004996	Mri1	4.61416	4.60937	4.65798	4.58996	4.63897	4.78811	5.49201	5.39698	5.58086	5.34648	5.3897	5.46704	4.78061	4.63613	4.68695	4.71109	4.67881	4.77333	4.84728	4.92255	4.94905	4.88419	4.82947	4.80163	5.0002	5.01819	5.03231	5.06967	5.05344	5.0594	4.85513	4.77374	4.84027	4.93316	4.83501	4.95154	4.62717	4.67235	5.48995	5.40107	4.70123	4.72108	4.9063	4.83843	5.0169	5.06084	4.82305	4.90657
ENSMUSG00000005034	Prkacb	9.77412	9.68081	9.81596	9.88963	9.78563	9.83433	10.5732	10.6757	10.754	10.6363	10.6261	10.6623	10.3335	10.1688	10.2876	10.2411	10.2742	10.3616	10.4049	10.3755	10.5436	10.5197	10.5239	10.4321	10.6801	10.5184	10.4462	10.6065	10.5402	10.6216	10.2321	10.1748	10.2101	10.2616	10.1709	10.1496	9.75697	9.83653	10.6677	10.6416	10.2633	10.2923	10.4413	10.4919	10.5482	10.5895	10.2057	10.194
ENSMUSG00000005043	Sgsh	4.92728	4.93509	4.9045	4.85852	5.1661	5.17835	6.23143	6.4058	6.24151	6.26191	6.25436	6.34926	6.02364	6.76772	6.64654	6.82827	6.55897	6.51145	5.77567	5.99813	5.99073	5.89437	5.77591	5.82433	6.44124	6.55561	6.82693	6.40284	6.48359	6.69579	5.41079	5.57166	5.40112	5.26222	5.25894	5.32433	4.92229	5.06765	6.29291	6.28851	6.4793	6.6329	5.92151	5.83153	6.60793	6.5274	5.46119	5.28183
ENSMUSG00000005045	Chd5	7.49475	7.2802	7.18192	7.349	7.27503	7.1905	7.81828	7.83969	8.00983	7.81936	7.80574	7.82831	7.63533	7.57858	7.43796	7.65647	7.46194	7.41148	7.47851	7.50633	7.69911	7.60624	7.4436	7.6355	8.01999	7.51204	7.58648	7.65074	7.63284	7.42907	7.66384	7.51499	7.50208	7.39676	7.51279	7.7104	7.31896	7.27151	7.88927	7.8178	7.55062	7.50996	7.56132	7.56178	7.70617	7.57088	7.56031	7.53998
ENSMUSG00000005054	Cstb	7.81215	8.02148	8.08521	7.97069	7.99246	7.82241	8.84951	8.64016	8.73053	8.8887	8.69233	8.76109	8.41907	8.14395	8.37768	8.17478	8.15993	8.27071	8.91466	8.7876	8.73754	8.71063	8.78267	8.87247	8.80206	8.84542	8.76682	8.85905	8.96	8.88438	8.35885	8.30155	8.43066	8.33875	8.29061	8.41516	7.97295	7.92852	8.74007	8.7807	8.31357	8.20181	8.81327	8.78859	8.80477	8.90114	8.36368	8.34818
ENSMUSG00000005057	Sh2b2	1.99704	2.06294	2.03433	2.01021	2.10999	2.05603	3.13966	3.10019	3.17907	3.08903	3.13499	3.1147	2.29898	2.22096	2.14867	2.28041	2.25815	2.26373	2.16276	2.20217	2.19633	2.23927	2.18982	2.22876	2.89979	2.84851	2.81578	2.79815	2.76551	2.77346	NA	NA	NA	NA	NA	NA	2.03144	2.05875	3.13964	3.11291	2.22287	2.26743	2.18709	2.21928	2.85469	2.77904	NA	NA
ENSMUSG00000005069	Pex5	7.03266	7.11484	7.06048	6.96835	7.02679	7.12295	7.78528	7.71381	7.96852	7.78552	7.86656	7.96412	7.22535	7.31467	7.31213	7.41097	7.33023	7.34594	7.48919	7.4745	7.57617	7.41081	7.39761	7.58704	7.44044	7.35331	7.32155	7.38984	7.40393	7.37358	7.29186	7.12479	7.13114	7.21063	7.24805	7.25408	7.06933	7.03936	7.82253	7.87206	7.28405	7.36238	7.51329	7.46515	7.37177	7.38912	7.1826	7.23759
ENSMUSG00000005078	Jkamp	7.79416	8.16212	8.18788	8.11732	8.16906	8.24584	8.98956	9.21212	9.04722	8.95897	9.0581	9.11444	8.85	9.42332	9.30657	9.41863	9.19591	9.20133	8.79311	8.85154	8.55519	8.6583	8.75789	8.6429	9.14612	9.30846	9.51667	9.18032	9.14773	9.32208	8.20846	8.32284	8.19926	8.21734	8.00302	8.01056	8.04805	8.1774	9.08297	9.04384	9.1933	9.27196	8.73328	8.68636	9.32375	9.21671	8.24352	8.07697
ENSMUSG00000005087	Cd44	2.26004	2.13423	2.20686	2.10044	2.16277	2.13266	2.80004	2.88564	2.81119	2.84434	2.8102	2.81462	3.17128	3.34619	3.2159	3.06239	3.26553	3.22345	2.09271	2.13032	2.07938	2.06829	2.1376	2.08027	3.02952	3.10279	3.0411	2.95908	2.97684	3.07653	3.20446	3.26894	3.24282	3.40057	3.41576	3.25774	2.20038	2.13196	2.83229	2.82305	3.24446	3.18379	2.10081	2.09539	3.0578	3.00415	3.23874	3.35802
ENSMUSG00000005089	Slc1a2	9.18251	9.15694	9.18673	9.13619	9.1897	9.17958	10.4208	10.41	10.1174	10.4099	10.3413	10.1667	10.3817	10.6148	10.1955	10.3854	10.4213	10.1193	10.1508	9.90925	9.73254	9.8685	10.1343	10.0361	9.91727	9.95184	10.0109	10.0388	9.92525	9.84866	9.88849	9.7309	9.88456	9.83935	9.90303	9.84848	9.17539	9.16849	10.3161	10.306	10.3974	10.3087	9.93087	10.013	9.95999	9.93755	9.83465	9.86362
ENSMUSG00000005102	Eif2ak4	6.06492	5.96035	6.01678	6.0628	6.0707	6.01508	6.97223	6.90105	6.94885	6.89999	6.9706	6.70361	6.58908	6.40642	6.3624	6.42719	6.55632	6.34757	6.60925	6.78896	6.6932	6.64226	6.72287	6.78559	7.19465	6.93306	6.93564	7.01642	6.91737	6.93069	6.55939	6.51969	6.46759	6.4075	6.38042	6.5448	6.01402	6.04953	6.94071	6.85807	6.45263	6.44369	6.69714	6.71691	7.02112	6.95482	6.51556	6.44424
ENSMUSG00000005103	Wdr1	9.2186	8.99882	8.77214	8.84989	8.85156	8.80219	9.57023	9.36652	9.54395	9.54464	9.53269	9.49757	9.02778	8.8953	8.82167	8.98398	8.9342	8.98323	9.31278	9.31695	9.3766	9.28644	9.31696	9.4876	9.48744	9.15581	9.15619	9.4037	9.39662	9.28316	9.11646	9.06738	9.14333	9.2789	9.20018	9.20199	8.99652	8.83455	9.49357	9.52497	8.91492	8.96714	9.33544	9.36367	9.26648	9.36116	9.10906	9.22702
ENSMUSG00000005124	Ccn4	NA	NA	NA	NA	NA	NA	2.60417	2.60738	2.59138	2.63082	2.61407	2.62062	2.65002	2.89921	2.82644	2.80898	2.87592	2.84607	2.27325	2.31178	2.32244	2.30327	2.34297	2.35049	2.72762	2.81724	2.82128	2.78853	2.80569	2.87308	NA	NA	NA	NA	NA	NA	NA	NA	2.60098	2.62184	2.79189	2.84366	2.30249	2.33224	2.78871	2.82244	NA	NA
ENSMUSG00000005125	Ndrg1	4.00498	4.04741	4.02802	3.97576	4.03892	3.98945	4.99118	4.90993	4.96151	4.97712	4.96119	4.93053	4.6926	4.78611	4.60364	4.80093	4.57918	4.556	4.81404	4.79306	4.71314	4.70606	4.83551	4.85012	4.29761	4.13653	4.20104	4.26315	4.37393	4.13429	4.80257	4.73077	4.75093	4.85321	4.86938	4.86194	4.0268	4.00138	4.95421	4.95628	4.69412	4.64537	4.77342	4.79723	4.21173	4.25712	4.76142	4.86151
ENSMUSG00000005142	Man2b1	7.88752	7.93483	7.82604	7.88241	8.00547	8.09365	9.19263	9.41147	9.08252	9.18848	9.17585	9.20993	9.16817	9.98077	9.82261	9.76061	9.61466	9.55551	8.97775	9.01142	8.84484	8.95395	8.89301	8.81177	9.36364	9.7373	9.82526	9.48884	9.53494	9.74154	8.64995	8.96513	8.69501	8.62228	8.64368	8.78549	7.8828	7.99385	9.22887	9.19142	9.65718	9.64359	8.94467	8.88625	9.64207	9.58844	8.77003	8.68382
ENSMUSG00000005148	Klf5	3.82084	3.78029	3.7478	3.64756	3.73176	3.89822	4.38078	4.32332	4.48528	4.39105	4.40167	4.35687	4.21932	4.30041	4.32063	4.16714	4.13672	4.10343	4.6212	4.69187	4.77867	4.63936	4.5913	4.65239	5.37283	5.06701	4.81851	5.12043	5.04231	4.97946	4.72384	4.66311	4.70169	4.73539	4.7341	4.72059	3.78298	3.75918	4.39646	4.3832	4.28012	4.13576	4.69725	4.62768	5.08612	5.0474	4.69621	4.73003
ENSMUSG00000005150	Wdr83	5.1935	4.95004	4.81915	4.90946	5.01618	5.09882	5.66283	5.61072	5.66191	5.59218	5.71118	5.67601	5.18644	5.22327	5.11358	5.13881	5.20656	5.26812	5.32746	5.33065	5.50641	5.40383	5.32408	5.45004	5.591	5.3826	5.47715	5.51683	5.40404	5.49068	4.93928	4.95026	4.89383	4.91013	4.9832	4.92411	4.98756	5.00815	5.64515	5.65979	5.17443	5.2045	5.38817	5.39265	5.48358	5.47052	4.92779	4.93915
ENSMUSG00000005161	Prdx2	10.0648	9.74425	9.63792	9.67535	9.65984	9.80833	10.3444	10.2153	10.555	10.3251	10.3295	10.5276	9.8782	9.80712	9.9263	9.93201	9.91044	9.95277	10.1183	10.2334	10.3641	10.2693	10.1523	10.2891	10.4687	10.1479	10.0366	10.281	10.3277	10.2139	10.0515	9.87651	9.96724	10.0239	10.0842	9.98069	9.81564	9.71451	10.3716	10.3941	9.87054	9.93174	10.2386	10.2369	10.2178	10.2742	9.96507	10.0296
ENSMUSG00000005198	Polr2a	8.53136	8.512	8.1438	8.34457	8.36902	8.43649	9.29447	9.25674	9.23693	9.32668	9.22105	9.19369	8.76976	8.41931	8.59643	8.52705	8.57727	8.56594	8.97196	8.93298	9.06681	8.96294	8.912	9.08131	9.11694	8.94371	8.91773	9.12588	9.09689	9.05224	9.01611	8.99973	8.96101	9.00776	9.10798	9.19139	8.39572	8.38336	9.26271	9.24714	8.59517	8.55675	8.99058	8.98542	8.99279	9.09167	8.99228	9.10238
ENSMUSG00000005204	Senp3	5.56765	5.71753	5.60395	5.7897	5.76663	5.65659	6.45015	6.31404	6.33622	6.34621	6.40162	6.27473	5.94729	5.86773	5.99838	6.03145	5.96684	6.04445	5.99774	6.09087	6.05802	6.09783	6.05391	5.93787	5.83682	5.75024	5.74083	5.9445	5.9142	5.87934	5.61656	5.53363	5.49909	5.50185	5.65737	5.71084	5.62971	5.73764	6.3668	6.34085	5.9378	6.01424	6.04887	6.02987	5.77596	5.91268	5.54976	5.62335
ENSMUSG00000005220	Corin	7.79024	7.47005	7.51086	7.46532	7.5716	7.6418	8.46784	8.81307	8.43949	8.5196	8.47393	8.69636	8.35876	9.33304	9.06558	9.37524	9.04648	9.13174	8.02958	8.22794	8.05307	7.98212	8.1874	7.87064	8.48361	9.03413	9.23113	8.84511	8.90087	9.0555	7.33391	8.11302	7.49914	7.46593	7.34846	7.29057	7.59039	7.55958	8.57347	8.5633	8.91913	9.18449	8.10353	8.01339	8.91629	8.93383	7.64869	7.36832
ENSMUSG00000005225	Plekha8	4.53954	4.35394	4.53864	4.46287	4.54246	4.71767	5.08461	5.22733	5.25187	5.16589	5.15704	5.20463	5.14344	5.43726	5.62414	5.43434	5.61375	5.4247	4.64823	4.70109	4.67888	4.75194	4.66127	4.60272	5.17757	5.09489	5.11721	5.03146	4.9915	5.10145	4.02753	3.97449	3.98714	4.01006	4.0245	3.9635	4.47737	4.57433	5.18793	5.17585	5.40161	5.49093	4.67607	4.67197	5.12989	5.04147	3.99639	3.99935
ENSMUSG00000005237	Dnah2	NA	NA	NA	NA	NA	NA	2.69629	2.71133	2.66732	2.63055	2.70319	2.65534	1.80692	1.88578	1.71193	1.69926	1.83143	1.76803	2.11949	2.08434	2.08589	2.12103	2.11042	2.11023	3.30418	3.25068	3.28982	3.25815	3.21293	3.23796	2.78974	2.87991	2.78957	2.81301	2.80927	2.75092	NA	NA	2.69165	2.66302	1.80155	1.76624	2.09658	2.11389	3.28156	3.23635	2.81974	2.79107
ENSMUSG00000005251	Ripk4	NA	NA	NA	NA	NA	NA	2.15225	2.1035	2.1744	2.15309	2.1257	2.13412	NA	NA	NA	NA	NA	NA	NA	NA	NA	NA	NA	NA	2.21875	2.28992	2.23416	2.23341	2.18224	2.28827	1.57682	1.65214	1.61287	1.65768	1.62929	1.5984	NA	NA	2.14338	2.13764	NA	NA	NA	NA	2.24761	2.23464	1.61394	1.62846
ENSMUSG00000005262	Ufd1	7.33915	7.41618	7.50591	7.35935	7.34983	7.49561	8.26448	8.1927	8.35921	8.24944	8.13347	8.35132	7.67545	7.78808	7.92153	7.77002	7.72442	7.66613	8.10625	8.01165	8.18415	8.08322	8.07644	8.17451	8.28303	8.16383	8.10874	8.26388	8.15074	8.31233	7.84618	7.81909	7.84266	8.0027	7.80673	7.78331	7.42041	7.4016	8.27213	8.24474	7.79502	7.72019	8.10068	8.11139	8.1852	8.24231	7.83597	7.86425
ENSMUSG00000005267	Zfp287	4.99693	4.71111	4.77627	4.65692	4.744	4.60242	5.28645	5.27135	5.32121	5.32095	5.25408	5.48005	4.54104	4.5889	4.31094	4.53226	4.53428	4.56646	4.84924	4.85606	4.94772	4.92163	4.86211	4.87008	5.09299	4.89592	4.8126	5.05819	4.96069	4.90895	4.73278	4.6176	4.68963	4.64157	4.71258	4.72333	4.8281	4.66778	5.29301	5.35169	4.48029	4.54433	4.88434	4.88461	4.93384	4.97594	4.68	4.69249
ENSMUSG00000005268	Prlr	3.50105	3.58899	3.50925	3.54789	3.51391	3.49967	4.46132	4.67255	4.47669	4.45893	4.51542	4.55207	4.60288	4.89586	4.50166	4.52651	4.78519	4.7704	4.10856	4.08461	4.04523	4.13746	4.07631	4.16006	4.79588	4.97853	4.84538	4.58335	4.58606	4.75378	4.3264	4.32482	4.33565	4.45631	4.32231	4.32324	3.5331	3.52049	4.53685	4.50881	4.6668	4.69403	4.07947	4.12461	4.87327	4.64106	4.32896	4.36728
ENSMUSG00000005299	Letm1	7.76192	7.52311	7.38817	7.38211	7.43498	7.37439	8.1509	8.02754	8.16276	8.18245	8.18552	8.19208	7.86008	7.93437	7.75424	7.92372	7.8317	7.89741	7.96491	7.94329	8.17888	7.98593	7.92478	8.02568	8.14074	7.96558	8.03046	7.97329	8.0089	7.9806	7.94408	8.03571	7.82161	8.00726	7.95412	8.07254	7.55773	7.39716	8.11373	8.18668	7.84956	7.88427	8.02903	7.97879	8.0456	7.98759	7.9338	8.01131
ENSMUSG00000005312	Ubqln1	10.4835	10.6931	10.8066	10.5676	10.5534	10.5826	11.3752	11.2185	11.4267	11.3843	11.2549	11.3104	10.92	10.7225	10.8683	10.7632	10.7741	10.8067	11.2885	11.3526	11.4018	11.3364	11.3506	11.3099	11.6891	11.5395	11.4599	11.5672	11.5502	11.5355	11.3129	11.2373	11.2894	11.2383	11.2379	11.2027	10.6611	10.5679	11.3401	11.3165	10.8369	10.7814	11.3476	11.3323	11.5628	11.5509	11.2799	11.2263
ENSMUSG00000005338	Cadm3	12.1632	11.8594	12.3481	12.1097	12.1663	12.2657	13.3861	13.5542	13.1395	13.3999	13.3237	13.1735	13.3246	13.9096	13.8041	13.3015	13.6881	13.535	13.0461	13.0237	12.9051	13.1468	12.9606	12.7853	13.4114	13.9348	13.8945	13.5756	13.4723	13.7726	12.5408	12.854	12.7138	12.4188	12.2953	12.4303	12.1236	12.1805	13.3599	13.299	13.6794	13.5082	12.9916	12.9643	13.7469	13.6068	12.7029	12.3814
ENSMUSG00000005354	Txn2	8.29123	8.28764	8.26559	8.31695	8.39229	8.67577	8.99581	9.04381	9.2815	9.11334	9.07855	9.18123	8.55682	8.57971	8.48473	8.63238	8.5521	8.60413	8.93475	8.88044	8.98784	8.90674	8.84326	8.73884	9.11258	9.05787	9.01542	9.15854	9.09491	9.11492	8.39648	8.45838	8.36698	8.43601	8.29436	8.33874	8.28149	8.46167	9.10704	9.12437	8.54042	8.5962	8.93434	8.82961	9.06196	9.12279	8.40728	8.35637
ENSMUSG00000005357	Slc1a6	11.8962	11.893	11.7776	11.7062	11.8915	12.0493	12.9639	13.2835	12.9708	12.987	13.0869	13.1255	12.8303	13.717	13.3977	13.8289	13.4603	13.5012	12.5266	12.7181	12.4534	12.6664	12.4383	12.331	12.5825	13.1628	13.4883	13.0078	13.147	13.1432	11.814	12.3376	12.0784	11.787	11.8019	11.7824	11.8556	11.8823	13.0727	13.0665	13.315	13.5968	12.566	12.4785	13.0779	13.0993	12.0767	11.7904
ENSMUSG00000005360	Slc1a3	8.17028	7.61623	7.66396	7.69123	7.69704	7.68099	8.88074	8.82817	8.68076	8.81107	8.8463	8.66135	8.50751	8.64312	8.19481	8.472	8.51311	8.33986	8.43407	8.37722	8.2595	8.24808	8.4377	8.39083	8.4165	8.06512	8.32929	8.121	8.29997	8.01259	8.06773	7.86158	8.01367	8.1711	8.38833	8.21225	7.81682	7.68975	8.79655	8.77291	8.44848	8.44166	8.35693	8.35887	8.2703	8.14452	7.981	8.25723
ENSMUSG00000005362	Crbn	8.5115	8.53859	8.54764	8.73837	8.65786	8.70391	9.40059	9.42364	9.51963	9.44662	9.4996	9.54026	8.96732	8.77111	8.73167	8.81629	8.85986	8.88158	9.21224	9.13102	9.23381	9.22537	9.22819	9.21761	9.42308	9.24911	9.23831	9.35504	9.33302	9.29899	8.92674	8.90896	8.91183	9.11058	8.97934	8.97361	8.53257	8.70005	9.44795	9.4955	8.82336	8.85258	9.19235	9.22372	9.3035	9.32902	8.91584	9.02118
ENSMUSG00000005370	Msh6	6.23155	6.16043	6.42189	6.18706	6.38293	6.29206	6.97416	6.83422	6.94308	6.82095	6.94811	6.82289	6.47369	6.41789	6.49079	6.44427	6.49621	6.49072	6.86925	6.7321	6.89669	6.81768	6.8438	6.85853	7.09085	6.88028	6.77371	6.80922	6.82548	6.71479	6.90432	7.02754	6.94543	7.03614	6.9731	7.12311	6.27129	6.28735	6.91715	6.86398	6.46079	6.47707	6.83268	6.84	6.91495	6.78316	6.9591	7.04412
ENSMUSG00000005371	Fbxo11	8.49769	8.79177	8.87739	8.77129	8.62651	8.64874	9.54537	9.37197	9.54497	9.59836	9.47221	9.53571	9.18643	9.20079	9.29172	9.16281	9.26106	9.15636	9.25726	9.30048	9.43211	9.3773	9.42053	9.50119	9.6129	9.5404	9.52991	9.59514	9.46783	9.59681	9.288	9.30549	9.35005	9.36712	9.13296	9.2539	8.72228	8.68218	9.48744	9.53543	9.22631	9.19341	9.32995	9.43301	9.56107	9.55326	9.31451	9.25133
ENSMUSG00000005374	Tbl2	6.49777	6.31995	6.19663	6.35864	6.38584	6.3221	7.11215	7.23124	7.13787	7.00072	7.16166	7.18505	6.9409	7.39354	7.35034	7.27427	7.04287	7.13564	6.4691	6.44419	6.51607	6.47673	6.43642	6.52669	6.58512	6.60162	6.76321	6.56234	6.51026	6.53218	6.19437	6.27523	6.27098	6.13605	6.27165	6.30059	6.33811	6.35553	7.16042	7.11581	7.22826	7.15093	6.47645	6.47995	6.64998	6.53493	6.24686	6.2361
ENSMUSG00000005378	Bud23	5.40009	5.43352	5.5099	5.24721	5.45173	5.52082	6.02608	6.21007	6.28825	6.0663	6.17443	6.32724	5.4897	5.60988	5.48161	5.62789	5.43246	5.55819	5.82241	5.79415	5.80822	5.90642	5.68309	5.82582	5.7673	5.84885	5.93316	5.84638	5.89717	5.95911	5.56473	5.56346	5.39698	5.49303	5.57587	5.55844	5.44784	5.40659	6.1748	6.18932	5.52706	5.53951	5.80826	5.80511	5.84977	5.90088	5.50839	5.54245
ENSMUSG00000005397	Nid1	2.10807	2.22568	2.0894	2.18782	2.16716	2.17891	3.15419	3.23153	3.15106	3.14183	3.21178	3.14473	3.24098	3.44761	3.27331	3.3839	3.30615	3.25529	2.79001	2.79117	2.76406	2.7305	2.81036	2.75431	2.34366	2.39596	2.42965	2.39635	2.42981	2.39097	2.3754	2.3536	2.37773	2.37332	2.42131	2.37933	2.14105	2.17796	3.17893	3.16611	3.32063	3.31511	2.78175	2.76506	2.38975	2.40571	2.36891	2.39132
ENSMUSG00000005410	Mcm5	4.51162	4.23386	4.25619	4.16232	4.34598	4.2175	4.60622	4.64257	4.63834	4.61947	4.59325	4.64113	4.085	3.99561	4.00635	4.01453	3.91018	4.14952	4.34398	4.35214	4.49404	4.30128	4.35395	4.43752	4.12278	4.18862	4.28347	4.24439	4.22212	4.20866	4.44893	4.43768	4.4648	4.47398	4.54477	4.43874	4.33389	4.24193	4.62904	4.61795	4.02899	4.02474	4.39672	4.36425	4.19829	4.22506	4.45047	4.48583
ENSMUSG00000005413	Hmox1	2.6465	2.76692	2.6736	2.71507	2.73991	2.78844	3.10707	3.10517	3.21064	3.13881	3.07735	3.09668	2.74783	2.56595	2.64385	2.60532	2.70809	2.67128	2.96325	2.99677	2.94468	2.93542	3.01447	3.00359	2.74317	2.67642	2.72313	2.60563	2.62371	2.81478	3.05588	3.07863	3.09178	3.11741	3.18395	3.11101	2.69567	2.74781	3.14096	3.10428	2.65254	2.66156	2.96823	2.98449	2.71424	2.68138	3.07543	3.13746
ENSMUSG00000005417	Mprip	9.6401	9.52823	9.67509	9.40044	9.3552	9.21368	9.81412	9.71295	9.97406	9.81423	9.69469	9.86209	9.55883	9.51728	9.28473	9.54723	9.37465	9.29351	9.61731	9.64015	9.55046	9.24152	9.48227	9.63255	9.6284	9.8434	9.88254	9.75937	9.7936	9.67986	8.95052	9.00592	8.96522	9.0035	9.07365	9.06734	9.61448	9.32311	9.83371	9.79034	9.45361	9.40513	9.60264	9.45211	9.78478	9.74428	8.97389	9.04817
ENSMUSG00000005442	Cic	7.16298	6.99767	7.03403	7.04315	7.1589	7.26869	8.06889	7.95895	7.79589	8.01742	7.96688	7.76943	7.68692	7.71166	7.73526	7.59536	7.65887	7.77355	7.80897	7.80507	7.80538	7.77625	7.67451	7.70989	7.98381	8.24209	8.30058	8.06718	8.05949	8.1665	7.76811	7.72039	7.61022	7.67539	7.82481	7.97051	7.06489	7.15691	7.94124	7.91791	7.71128	7.67592	7.80647	7.72021	8.17549	8.09772	7.69958	7.82357
ENSMUSG00000005447	Pafah1b3	6.62805	6.58547	6.40785	6.48517	6.39311	6.50915	7.04086	6.97046	7.17323	7.14182	6.98243	7.15833	6.485	6.5043	6.27964	6.53175	6.68244	6.50752	6.78432	6.8653	6.86732	6.86084	6.76777	6.87468	7.08655	6.94589	6.85006	6.98758	6.94381	7.03902	6.48677	6.3406	6.5589	6.27345	6.51096	6.4581	6.54046	6.46248	7.06152	7.09419	6.42298	6.5739	6.83898	6.83443	6.96083	6.99013	6.46209	6.41417
ENSMUSG00000005469	Prkaca	9.48416	9.52837	9.54509	9.66264	9.61169	9.53525	10.2466	10.2672	10.3553	10.2505	10.3526	10.3025	10.0005	9.85268	9.8799	9.87884	9.92264	9.88307	10.0073	10.0008	10.1027	10.0438	10.0033	10.0605	10.1629	10.1338	10.1358	10.1511	10.122	10.1636	9.81583	9.8243	9.7921	9.8504	9.87231	9.88432	9.51921	9.60319	10.2897	10.3019	9.91103	9.89485	10.0369	10.0358	10.1442	10.1455	9.81074	9.86901
ENSMUSG00000005481	Ddx39	4.8409	5.01273	4.8374	4.79504	4.83174	4.80584	5.5299	5.35432	5.63707	5.45353	5.45223	5.48956	5.07919	5.00967	5.26358	5.08316	5.04966	5.14409	5.174	5.1759	5.04695	5.14332	5.18773	5.12096	5.266	5.15357	5.18355	5.17017	5.13403	5.07845	4.77733	4.91406	4.93159	4.93338	4.93972	4.91022	4.89701	4.81087	5.5071	5.46511	5.11748	5.09231	5.13229	5.15067	5.20104	5.12755	4.87432	4.92777
ENSMUSG00000005483	Dnajb1	7.32332	7.42997	7.26624	7.18767	7.3086	7.33895	7.93302	7.79493	8.01968	7.89063	7.92452	7.87347	7.63153	7.96387	7.9308	8.02573	8.0066	7.63113	7.78741	7.74331	7.76693	7.83041	7.72721	7.86481	8.11429	7.92792	7.72742	7.79996	7.87216	7.75222	7.55729	7.59166	7.4977	7.47678	7.59779	7.69873	7.33984	7.27841	7.91588	7.89621	7.84206	7.88782	7.76588	7.80747	7.92321	7.80811	7.54888	7.5911
ENSMUSG00000005501	Usp40	3.05005	3.12264	3.23732	3.1308	3.09596	3.04793	3.90566	3.93687	3.90256	3.81665	3.9006	3.82532	3.33289	3.33341	3.35274	3.2657	3.40966	3.29625	3.34281	3.43675	3.40875	3.40446	3.39057	3.43889	3.7496	3.67207	3.67262	3.72884	3.78627	3.79426	3.53129	3.54685	3.55339	3.52666	3.43534	3.5027	3.13667	3.09156	3.91503	3.84752	3.33968	3.32387	3.3961	3.41131	3.6981	3.76979	3.54384	3.48823
ENSMUSG00000005505	Kbtbd4	6.09172	6.03133	5.96877	6.07955	6.15282	6.10216	6.97703	7.07662	7.19495	7.09331	7.19608	7.04833	6.53758	6.4917	6.31412	6.50935	6.56743	6.62031	6.62895	6.59644	6.71157	6.67419	6.722	6.72182	6.78142	6.59481	6.503	6.72234	6.75864	6.75306	6.76856	6.87025	6.889	6.9326	6.83916	6.7887	6.03061	6.11151	7.08287	7.11257	6.4478	6.56569	6.64565	6.706	6.62641	6.74468	6.84261	6.85349
ENSMUSG00000005506	Celf1	8.80734	8.95503	8.96291	8.95479	8.96702	8.94507	9.66417	9.5437	9.6879	9.68501	9.64354	9.72622	9.15414	9.14579	9.22355	9.24004	9.15367	9.18896	9.38466	9.37863	9.38865	9.29121	9.38709	9.31041	9.509	9.50027	9.48642	9.59503	9.60232	9.61085	9.20619	9.14576	9.23171	9.16001	9.09501	9.24041	8.90843	8.95563	9.63193	9.68492	9.17449	9.19423	9.38398	9.32957	9.49856	9.60274	9.19455	9.16514
ENSMUSG00000005510	Ndufs3	8.50335	8.13157	7.88251	8.08368	8.04433	8.36765	8.67349	8.53213	8.9315	8.59703	8.65107	8.81996	8.00894	8.06566	7.99282	8.17519	8.04422	8.18285	8.51941	8.6051	8.72034	8.59004	8.51431	8.71271	8.8346	8.52562	8.54596	8.6043	8.72952	8.48498	8.24893	7.92021	8.22482	8.27154	8.32882	8.13093	8.17248	8.16522	8.71237	8.68935	8.02247	8.13409	8.61495	8.60569	8.63539	8.60627	8.13132	8.24376
ENSMUSG00000005514	Por	7.93399	7.70397	7.5856	7.68677	7.68016	7.73068	8.53395	8.53395	8.6245	8.42287	8.53859	8.63243	8.32076	8.71155	8.49484	8.49059	8.47059	8.44833	7.776	7.87304	7.91124	7.86853	7.66605	7.82473	8.06434	7.89826	8.12439	7.90459	7.98036	7.74177	7.71018	7.55436	7.73267	7.65177	7.94608	7.76733	7.74119	7.6992	8.56413	8.5313	8.50905	8.46984	7.85343	7.78644	8.029	7.87557	7.66574	7.78839
ENSMUSG00000005533	Igf1r	7.68279	7.7814	7.61653	7.5763	7.78853	7.81203	8.70271	8.82302	8.61986	8.68031	8.67711	8.66705	8.60624	9.39275	9.25098	9.12792	9.04989	9.11816	8.54632	8.58522	8.66702	8.61359	8.56402	8.57954	8.97978	9.3059	9.47249	9.11887	9.12278	9.28526	8.17611	8.57408	8.29157	8.24708	8.23433	8.34984	7.69357	7.72562	8.71519	8.67483	9.08332	9.09866	8.59952	8.58572	9.25272	9.17564	8.34725	8.27709
ENSMUSG00000005534	Insr	7.50046	7.80442	7.7478	7.8648	7.91049	7.91949	8.93859	9.1514	8.84965	8.91066	8.90571	8.87626	8.92026	9.7307	9.66474	9.45863	9.38094	9.47095	8.71015	8.76299	8.59773	8.78733	8.74053	8.60027	9.30892	9.63164	9.74014	9.37058	9.3035	9.69523	8.58714	9.01424	8.67168	8.6543	8.51471	8.56982	7.68423	7.89826	8.97988	8.89754	9.43857	9.43684	8.69029	8.70938	9.56023	9.45644	8.75769	8.57961
ENSMUSG00000005540	Fcer2a	2.89894	2.78716	2.87847	2.88723	2.98863	3.05056	4.13657	4.19078	4.23689	4.14897	4.18434	4.31567	3.75903	4.00241	3.95633	4.00298	3.78553	4.07432	3.43573	3.37696	3.52032	3.45883	3.49848	3.48284	3.34606	3.34002	3.47248	3.39914	3.41564	3.43977	2.10356	2.23499	2.18605	2.13005	2.16738	2.09648	2.85486	2.97547	4.18808	4.21633	3.90592	3.95428	3.44434	3.48005	3.38619	3.41818	2.17487	2.1313
ENSMUSG00000005566	Trim28	8.91657	8.76282	8.49377	8.61394	8.5587	8.55916	9.38688	9.16204	9.27909	9.28487	9.16134	9.19554	8.69605	8.49579	8.52434	8.54772	8.57032	8.47468	9.1215	9.07285	9.27617	9.08543	9.08087	9.09469	9.28129	9.12981	9.04732	9.23587	9.26771	9.14101	9.11277	8.97659	9.01786	8.93066	9.07897	9.1018	8.72439	8.57727	9.276	9.21392	8.57206	8.53091	9.15684	9.087	9.15281	9.21486	9.03574	9.03714
ENSMUSG00000005575	Ube2m	9.39913	9.5038	9.47141	9.55598	9.54701	9.50444	10.3851	10.2511	10.3758	10.3826	10.3618	10.351	9.88046	9.71404	9.8596	9.7971	9.74524	9.77593	10.2493	10.2434	10.0685	10.0482	10.0721	10.0783	10.2443	10.2404	10.2151	10.3066	10.3988	10.2828	9.55554	9.64236	9.66871	9.71428	9.59532	9.55967	9.45812	9.53581	10.3373	10.3651	9.81804	9.77275	10.1871	10.0662	10.2333	10.3294	9.62221	9.62309
ENSMUSG00000005580	Adcy9	7.72852	7.6999	7.87302	7.74538	7.76377	7.74039	8.88788	9.10467	8.7753	8.81468	8.8296	8.83459	8.90185	9.42446	9.27732	9.00945	9.20094	9.03954	8.6252	8.71151	8.54062	8.65466	8.65858	8.4625	9.28915	9.55322	9.68882	9.22687	9.16877	9.3453	8.51748	8.78398	8.58125	8.51912	8.51993	8.5334	7.76715	7.74985	8.92261	8.82629	9.20121	9.08331	8.62578	8.59191	9.5104	9.24698	8.62757	8.52415
ENSMUSG00000005583	Mef2c	8.85487	9.00901	8.89808	9.00699	9.06246	9.10899	9.79933	9.86728	9.95771	9.87477	9.93568	9.99045	9.62877	9.51517	9.63361	9.82261	9.65506	9.58541	9.80156	9.72333	9.87056	9.74236	9.84279	9.90288	10.0119	9.78264	9.632	9.8417	9.85534	9.83365	9.74998	9.7721	9.71027	9.66269	9.73034	9.65111	8.92065	9.05948	9.87477	9.93363	9.59252	9.6877	9.79848	9.82934	9.80884	9.84357	9.74412	9.68138
ENSMUSG00000005609	Ctr9	7.02553	7.08268	6.97343	7.06148	7.02205	7.24122	7.93645	8.02457	8.00806	7.95708	8.01926	7.98964	7.5236	7.59281	7.66736	7.66264	7.63884	7.64324	7.46239	7.49844	7.52772	7.55802	7.51117	7.75018	7.85728	7.58259	7.65008	7.68734	7.76224	7.58408	7.76477	7.80516	7.81108	7.81852	7.85149	7.82589	7.02721	7.10825	7.98969	7.98866	7.59459	7.64824	7.49618	7.60646	7.69665	7.67789	7.79367	7.83197
ENSMUSG00000005610	Eif4g2	10.3749	10.4206	10.6307	10.6431	10.6409	10.5347	11.3483	11.4584	11.4158	11.3964	11.4607	11.4321	11.1477	11.065	11.1713	11.104	11.2088	11.1974	11.1529	11.2457	11.0022	11.1682	11.1256	11.1517	11.3392	11.4754	11.4208	11.4092	11.4988	11.4776	10.6094	10.7026	10.7619	10.6505	10.4156	10.6434	10.4754	10.6063	11.4075	11.4297	11.128	11.1701	11.1336	11.1485	11.4118	11.4619	10.6913	10.5699
ENSMUSG00000005611	Mrvi1	2.65914	2.69637	2.7501	2.59662	2.67767	2.59013	3.37127	3.36149	3.37029	3.31919	3.34704	3.36004	2.69384	2.64549	2.76337	2.66028	2.64269	2.6209	3.28645	3.32522	3.28717	3.29848	3.24432	3.30003	3.55439	3.51226	3.32783	3.52795	3.45645	3.41736	2.96785	2.92239	2.95289	2.95192	3.03329	2.98236	2.70187	2.62147	3.36769	3.34209	2.7009	2.64129	3.29961	3.28094	3.46483	3.46725	2.94771	2.98919
ENSMUSG00000005615	Pcyt1a	6.44483	6.69006	6.58789	6.56152	6.43933	6.56202	7.3872	7.31413	7.36829	7.22188	7.19771	7.38482	6.92269	7.1557	7.11942	7.14402	6.96983	6.93006	7.08623	7.0459	7.05657	7.2049	7.09837	7.04375	7.3917	7.13753	7.14646	7.22365	7.28113	7.36666	6.77934	6.70453	6.89906	6.61517	6.64487	6.52037	6.57426	6.52095	7.35654	7.26813	7.06594	7.01464	7.0629	7.11567	7.22523	7.29048	6.79431	6.59347
ENSMUSG00000005621	Zfp592	6.41136	6.34501	6.48498	6.38542	6.37984	6.43568	7.09653	7.10568	7.12399	7.19139	7.00752	7.077	6.74728	6.78462	6.87925	6.46056	6.7792	6.63925	6.93036	6.93439	6.87247	6.88036	6.90266	6.88344	7.21512	7.37022	7.41719	7.27807	7.36825	7.471	6.73595	6.88236	6.7522	6.74009	6.71158	6.86417	6.41378	6.40032	7.10873	7.09197	6.80372	6.62634	6.91241	6.88882	7.33418	7.37244	6.79017	6.77194
ENSMUSG00000005625	Psmd4	9.04873	8.97413	8.91797	8.82394	8.80196	8.9101	9.42444	9.17987	9.49	9.37398	9.31327	9.3499	9.0426	8.93953	8.97624	8.94565	8.93579	8.96261	9.23609	9.22823	9.39197	9.29764	9.21418	9.29551	9.45104	9.28133	9.21795	9.38157	9.3729	9.32687	9.17316	8.98953	9.17713	9.00989	9.21428	9.08478	8.98028	8.84534	9.36477	9.34572	8.98612	8.94802	9.28543	9.26911	9.31677	9.36045	9.11327	9.10298
ENSMUSG00000005656	Snx6	7.63732	7.73643	7.82856	7.71123	7.54863	7.64602	8.38035	8.20374	8.41764	8.25799	8.28828	8.37442	7.92771	7.95491	7.90581	7.9838	8.00681	7.98865	8.09258	8.1329	8.2737	8.12828	8.11677	8.16923	8.31905	8.12481	8.03734	8.14173	8.21284	8.2213	7.77046	7.70037	7.90213	7.8769	7.80408	7.80766	7.7341	7.63529	8.33391	8.3069	7.92948	7.99308	8.16639	8.13809	8.1604	8.19196	7.79099	7.82955
ENSMUSG00000005667	Mthfd2	6.0115	5.56214	5.66754	5.48103	5.47347	5.45852	5.84315	5.77288	5.86172	5.78611	5.85167	5.85496	5.47395	5.37224	5.53377	5.44965	5.3916	5.60255	5.77142	5.8009	5.95369	5.8271	5.7185	5.82543	5.81463	5.72347	5.6345	5.7626	5.67822	5.72353	5.51794	5.50025	5.38476	5.48062	5.41527	5.25938	5.74706	5.47101	5.82592	5.83091	5.45999	5.48127	5.842	5.79034	5.7242	5.72145	5.46765	5.38509
ENSMUSG00000005672	Kit	10.7649	10.8282	11.0983	10.8836	10.911	10.9193	12.1136	12.3851	11.859	12.127	12.1421	12.1742	12.0285	12.6994	12.5703	12.5673	12.3333	12.4249	12.0699	11.9968	11.7591	11.9521	11.9373	11.802	12.1868	12.9573	12.998	12.7878	12.7594	12.9977	11.2941	12.0766	11.4748	11.6791	11.3158	11.4655	10.8972	10.9046	12.1192	12.1478	12.4328	12.4418	11.942	11.8971	12.714	12.8483	11.6152	11.4868
ENSMUSG00000005674	Tomm40l	6.06701	6.01159	5.86106	5.93728	6.06848	5.90537	6.67906	6.76842	6.66666	6.57071	6.79954	6.70443	6.33453	6.48812	6.38209	6.58667	6.48284	6.47506	6.24009	6.23136	6.23751	6.05152	6.20426	6.25532	6.34786	6.3469	6.55637	6.3813	6.31726	6.4762	5.97912	5.87456	5.86529	5.90686	5.88869	5.70063	5.97989	5.97038	6.70472	6.69156	6.40158	6.51486	6.23632	6.17037	6.41704	6.39159	5.90632	5.83206
ENSMUSG00000005681	Apoa2	3.64133	3.70049	3.62733	3.71599	3.80655	3.81005	4.71148	4.77154	4.84546	4.67139	4.68964	4.74233	4.49516	4.58877	4.75852	4.73846	4.72919	4.55889	4.12006	4.2123	4.19751	4.14329	4.16301	4.15605	4.59221	4.51722	4.80635	4.56246	4.62509	4.57568	3.77659	3.91707	3.86764	3.8564	3.83811	3.83052	3.65638	3.77753	4.77616	4.70112	4.61415	4.67551	4.17663	4.15412	4.6386	4.58775	3.85377	3.84168
ENSMUSG00000005682	Pan2	5.17273	5.22098	5.09781	5.21979	5.18655	5.30057	6.05054	6.06833	6.13253	6.17689	6.11872	5.94329	5.35409	5.2772	5.26398	5.30812	5.44329	5.38445	5.69405	5.72116	5.79677	5.79671	5.74763	5.83951	5.73927	5.76528	5.8358	5.91258	5.90358	5.74283	5.48468	5.4681	5.56024	5.54029	5.54053	5.46149	5.16384	5.23564	6.0838	6.07964	5.29842	5.37862	5.73733	5.79461	5.78012	5.853	5.50434	5.51411
ENSMUSG00000005683	Cs	9.88216	10.0411	9.80425	9.756	9.65691	9.78554	10.488	10.2996	10.5987	10.4857	10.4139	10.4013	9.96411	9.78784	9.81556	9.90027	9.80131	9.86072	10.4002	10.3668	10.557	10.4146	10.4418	10.5212	10.6378	10.3276	10.2687	10.5508	10.578	10.4306	10.5256	10.3786	10.3601	10.3837	10.4935	10.4515	9.90917	9.73282	10.4621	10.4336	9.85584	9.8541	10.4413	10.4592	10.4114	10.5198	10.4214	10.4429
ENSMUSG00000005686	Ampd3	5.13412	5.24589	5.06726	5.16012	5.27476	5.22501	5.98641	5.94906	5.85202	6.02601	6.01314	5.89385	5.38386	5.39602	5.41776	5.53729	5.36643	5.36973	5.76662	5.81836	5.90454	5.80512	5.76898	5.89987	5.8075	5.52556	5.45797	5.74096	5.71501	5.60786	5.97635	5.96228	5.80299	5.97627	6.00678	6.04753	5.14909	5.21996	5.92916	5.97767	5.39921	5.42448	5.82984	5.82466	5.59701	5.68794	5.91387	6.01019
ENSMUSG00000005687	Bcas2	9.0002	9.04052	9.21255	8.79601	8.82029	8.93867	9.74059	9.6739	9.82319	9.76278	9.62074	9.74063	9.16447	8.94672	9.01381	9.03022	9.01007	9.0884	9.81321	9.75124	9.79719	9.90315	9.6865	9.65211	10.1703	10.0913	9.94015	10.1292	10.2148	10.2025	9.13172	9.19199	9.20123	9.20946	8.9134	8.94086	9.08443	8.85166	9.74589	9.70805	9.04167	9.0429	9.78721	9.74725	10.0673	10.1822	9.17498	9.02124
ENSMUSG00000005698	Ctcf	8.26275	8.36869	8.68481	8.55388	8.48669	8.59305	9.45999	9.3827	9.34046	9.49085	9.38117	9.39842	8.77894	8.40971	8.3268	8.29116	8.62281	8.47964	9.21502	9.28546	9.19698	9.3206	9.2975	9.25419	9.45321	9.54282	9.42783	9.49175	9.49791	9.48652	8.88665	8.86303	8.95151	8.8424	8.74721	8.82716	8.43875	8.54454	9.39438	9.42348	8.50515	8.46454	9.23248	9.29076	9.47462	9.49206	8.9004	8.80559
ENSMUSG00000005699	Pard6a	5.99233	5.794	5.99208	5.84174	5.96082	5.97609	6.49972	6.38183	6.39857	6.44937	6.45656	6.58312	6.06314	6.07438	6.19925	5.99145	6.01138	6.06445	6.10825	6.17989	6.16247	6.14793	6.12607	6.04048	6.45906	6.33496	6.2906	6.16967	6.27829	6.44217	6.01765	6.11237	6.02712	5.85545	5.98437	6.0823	5.92614	5.92622	6.42671	6.49635	6.11226	6.02243	6.1502	6.10483	6.36154	6.29671	6.05238	5.97404
ENSMUSG00000005716	Pvalb	12.6557	12.5481	12.5456	12.237	12.2841	12.2877	13.067	13.097	13.1527	12.9857	12.9741	13.1163	12.7177	12.7653	12.7749	12.9786	12.6663	12.8026	12.972	13.1471	13.0815	12.9164	12.9806	12.9254	13.208	13.2031	13.141	13.1948	13.3212	13.3228	12.6424	12.572	12.549	12.5354	12.5033	12.4761	12.5832	12.2696	13.1055	13.0254	12.7526	12.8158	13.0669	12.9408	13.184	13.2796	12.5878	12.5049
ENSMUSG00000005718	Tfap4	3.40886	3.56338	3.40962	3.57302	3.5349	3.50532	4.25501	4.18759	4.16696	4.15493	4.2278	4.19679	4.069	3.96251	3.94339	3.81757	3.69795	3.78489	4.06545	4.11168	4.10766	4.15907	4.04942	4.25987	3.82224	3.74365	3.81485	3.98137	3.75762	3.78032	3.87742	3.78777	3.72646	3.7792	3.84132	3.78801	3.46062	3.53775	4.20319	4.19318	3.99163	3.7668	4.09493	4.15612	3.79358	3.83977	3.79722	3.80284
ENSMUSG00000005732	Ranbp1	8.28847	8.433	8.64567	8.60726	8.64388	8.56172	9.44238	9.48794	9.58418	9.52636	9.51377	9.59351	9.03108	8.78717	8.82497	8.83128	8.94292	8.89645	9.24264	9.18949	9.30136	9.40546	9.21095	9.35077	9.34855	9.42418	9.422	9.44287	9.55249	9.53076	8.75962	8.70802	8.86733	8.83162	8.68188	8.75472	8.45571	8.60429	9.50484	9.54455	8.88107	8.89022	9.2445	9.32239	9.39824	9.5087	8.77832	8.75607
ENSMUSG00000005774	Rfx5	5.66109	5.53264	5.7461	5.57418	5.57118	5.60524	6.43851	6.4342	6.47417	6.37788	6.40731	6.43251	6.11385	5.88145	5.90812	5.9512	5.97232	6.08429	6.24716	6.29448	6.32523	6.37488	6.31088	6.16144	6.55218	6.58797	6.33044	6.4465	6.56118	6.48518	6.01895	6.11354	6.08623	6.06124	6.01435	5.86391	5.64661	5.58353	6.44896	6.4059	5.96781	6.0026	6.28896	6.2824	6.4902	6.49762	6.07291	5.97983
ENSMUSG00000005779	Psmb4	9.18167	8.93164	8.626	8.86687	8.85914	8.98846	9.62294	9.569	9.66898	9.61655	9.6189	9.59237	9.04991	9.10128	9.04479	9.08734	9.11941	9.10545	9.40008	9.36715	9.57072	9.40297	9.32466	9.33909	9.5098	9.45952	9.33379	9.47775	9.51115	9.40065	9.25246	9.20086	9.17506	9.15325	9.37516	9.3124	8.9131	8.90483	9.62031	9.60928	9.06533	9.10407	9.44598	9.35557	9.43437	9.46318	9.20946	9.28027
ENSMUSG00000005802	Slc30a4	6.77291	6.77282	7.14605	6.84758	6.86352	7.03192	7.94402	8.16913	8.03882	7.99527	8.0608	8.05995	7.99996	8.48122	8.2936	8.32288	8.29113	8.33429	7.75893	7.72401	7.64223	7.69749	7.72703	7.56267	8.21383	8.40786	8.4138	8.16709	8.26157	8.34999	7.00921	7.18352	7.09171	7.09386	6.78409	7.02668	6.89726	6.91434	8.05066	8.03868	8.25826	8.3161	7.70839	7.6624	8.34516	8.25955	7.09481	6.96821
ENSMUSG00000005803	Sqor	NA	NA	NA	NA	NA	NA	2.96572	2.97435	2.99509	2.98131	3.00027	2.9773	2.30615	2.41031	2.30786	2.27253	2.39223	2.31353	2.75458	2.71857	2.6986	2.77353	2.74109	2.72999	3.3198	3.22767	3.28066	3.4098	3.2496	3.31355	3.1235	3.04064	3.11655	3.13186	3.09062	3.07033	NA	NA	2.97838	2.98629	2.34144	2.3261	2.72392	2.7482	3.27604	3.32432	3.09356	3.0976
ENSMUSG00000005804	Bloc1s6	6.03829	6.03877	6.22861	6.07901	6.07838	6.23386	6.85647	6.8278	6.94158	6.78055	6.773	6.67286	6.47056	6.33538	6.28382	6.29682	6.36875	6.43111	6.70939	6.82803	6.69833	6.85939	6.80432	6.81524	6.81493	6.78943	6.89021	6.87517	7.06229	6.95009	6.24159	6.21816	6.23833	6.39478	6.44813	6.35704	6.10189	6.13042	6.87528	6.74214	6.36325	6.36556	6.74525	6.82632	6.83153	6.96252	6.23269	6.39998
ENSMUSG00000005813	Metap1	7.30338	7.45437	7.29903	7.42158	7.35578	7.52487	8.04691	8.0321	8.11939	8.10733	8.03143	8.15381	7.67099	7.51663	7.47551	7.62415	7.61431	7.62117	7.8434	7.91574	7.93152	7.93732	7.80719	7.85455	8.09322	7.82463	7.7422	7.90478	8.03389	7.9188	7.53818	7.64323	7.62835	7.59584	7.58944	7.71374	7.35226	7.43408	8.06613	8.09753	7.55438	7.61988	7.89689	7.86635	7.88668	7.95249	7.60325	7.63301
ENSMUSG00000005823	Gpr108	6.6063	6.58968	6.72501	6.61298	6.7261	6.69598	7.46911	7.61076	7.42986	7.55239	7.5722	7.60594	7.5129	8.16068	7.98543	7.93787	7.93491	7.99761	7.04922	7.11925	7.07302	7.17354	7.09402	6.98154	7.63863	7.98352	8.08564	7.6672	7.63116	7.81057	6.89656	7.16213	6.83786	6.74633	6.77401	6.87717	6.64033	6.67836	7.50325	7.57684	7.88634	7.9568	7.0805	7.08303	7.9026	7.70297	6.96552	6.79917
ENSMUSG00000005846	Rsl1d1	7.89149	8.37374	8.63711	8.46049	8.32711	8.18408	9.28313	9.15604	9.15332	9.34911	9.17024	9.14512	8.77542	8.30476	8.41649	8.42357	8.44704	8.50644	9.11377	9.06991	9.05506	9.09597	9.15938	9.16941	9.13912	9.11214	9.12217	9.24437	9.30239	9.2216	8.96385	8.78451	8.90151	8.92044	8.81804	8.85755	8.30078	8.32389	9.1975	9.22149	8.49889	8.45902	9.07958	9.14159	9.12447	9.25612	8.88329	8.86534
ENSMUSG00000005871	Apc	8.98736	9.18988	9.19925	9.32645	9.22691	9.13103	9.98232	10.2198	10.1249	10.0433	10.1288	10.1204	9.94871	10.0203	10.0776	10.0507	10.1227	9.94457	9.79864	9.79908	9.76656	9.86237	9.86325	9.81614	10.3634	10.3231	10.3388	10.1679	10.1708	10.2115	10.1051	10.1165	10.0495	9.9969	10.1228	9.98632	9.1255	9.22813	10.109	10.0975	10.0155	10.0393	9.78809	9.84726	10.3418	10.1834	10.0903	10.0353
ENSMUSG00000005873	Reep5	9.43564	9.61812	9.79612	9.69438	9.67385	9.67261	10.7717	11.0516	10.7324	10.8483	10.7917	10.8079	10.688	11.0577	10.788	10.7177	10.871	10.6874	10.5372	10.5271	10.3421	10.6433	10.453	10.4155	10.9383	11.1549	11.1857	10.9373	10.922	10.9922	10.2344	10.2346	10.1323	10.1357	10.0962	10.1165	9.61662	9.68028	10.8519	10.816	10.8446	10.7587	10.4688	10.5039	11.093	10.9505	10.2004	10.1161
ENSMUSG00000005881	Ergic3	8.4194	8.30567	8.59659	8.46113	8.49021	8.55089	9.49049	9.4956	9.36238	9.43463	9.46637	9.43708	9.18392	9.65744	9.41877	9.41294	9.45815	9.32197	9.13216	9.03754	9.05852	9.10839	8.92642	9.06619	9.41188	9.40174	9.34935	9.27925	9.26874	9.23254	8.6436	8.68619	8.56783	8.61585	8.72001	8.75498	8.44056	8.50074	9.44949	9.44603	9.42005	9.39769	9.07608	9.03367	9.38766	9.26017	8.63254	8.69695
ENSMUSG00000005882	Uqcc1	7.33508	7.43762	7.37241	7.48985	7.46229	7.46799	8.0011	8.00643	8.08761	7.96551	8.0607	8.12285	7.68928	7.66353	7.63597	7.65291	7.66163	7.75121	7.86348	7.74197	8.02412	7.8237	7.84196	7.80945	8.03959	7.95341	7.89372	8.01262	7.86659	8.00644	7.6148	7.56696	7.63407	7.60327	7.61392	7.58773	7.3817	7.47338	8.03171	8.04969	7.66292	7.68858	7.87652	7.82504	7.96224	7.96188	7.60528	7.60164
ENSMUSG00000005886	Ncoa2	8.76053	8.88987	8.85331	8.83669	8.91237	8.92345	9.5344	9.52869	9.60835	9.5786	9.63522	9.65854	9.21115	9.12272	9.1319	9.20221	9.22751	9.27885	9.38893	9.33246	9.3394	9.40752	9.24296	9.24929	9.43211	9.49428	9.47975	9.56167	9.56054	9.61612	9.05455	9.07055	9.12959	8.99344	9.09439	9.0259	8.83457	8.89084	9.55715	9.62412	9.15526	9.23619	9.3536	9.29993	9.46871	9.57944	9.0849	9.03791
ENSMUSG00000005892	Trh	3.76714	3.75226	3.76642	3.96821	3.83387	3.83083	5.20678	5.12738	5.16325	5.27441	5.14699	5.19676	4.97721	5.22234	5.07786	5.13954	5.12506	5.11203	4.68498	4.73019	4.88052	4.72367	4.68408	4.72706	4.63001	4.73703	4.70016	4.62893	4.63221	4.497	4.06064	4.03471	4.05973	3.94979	3.89511	4.05748	3.76194	3.87763	5.1658	5.20605	5.09247	5.12554	4.76523	4.7116	4.68907	4.58605	4.05169	3.96746
ENSMUSG00000005893	Nr2c2	8.21817	7.87189	8.15096	7.97578	8.13346	8.14811	8.93241	8.82953	8.87952	8.91639	8.802	8.90727	8.42847	8.35762	8.24801	8.21348	8.24282	8.28914	8.65699	8.61221	8.46075	8.60377	8.64687	8.62281	8.80888	8.80253	8.82875	8.98083	8.98755	8.93825	8.16991	8.16945	8.1626	8.23527	8.26068	8.2119	8.08034	8.08578	8.88049	8.87522	8.3447	8.24848	8.57665	8.62448	8.81339	8.96888	8.16732	8.23595
ENSMUSG00000005897	Nr2c1	5.88931	6.09111	6.40414	5.9922	6.00565	6.00339	6.7392	6.62199	6.70956	6.71629	6.701	6.65266	6.39094	6.2823	6.36169	6.33652	6.24888	6.26924	6.56797	6.45886	6.5153	6.46106	6.53968	6.462	6.80051	6.77807	6.81088	6.88619	6.70802	6.90956	6.37831	6.32901	6.39296	6.41796	6.44948	6.33478	6.12819	6.00041	6.69025	6.68998	6.34498	6.28488	6.51404	6.48758	6.79649	6.83459	6.36676	6.40074
ENSMUSG00000005899	Smpd4	5.57537	5.36021	5.35857	5.37934	5.43858	5.32197	6.34267	6.18325	6.29508	6.39847	6.3408	6.33406	5.67662	5.28373	5.49562	5.46738	5.39048	5.5016	5.97454	5.87107	6.07752	5.94138	6.02795	6.04849	5.87836	5.96187	5.92918	6.17814	6.14665	5.89225	5.73648	5.76282	5.76387	5.67356	5.89235	5.85949	5.43138	5.37996	6.27367	6.35778	5.48532	5.45315	5.97438	6.00594	5.92314	6.07235	5.75439	5.80847
ENSMUSG00000005907	Pex1	4.56186	4.60379	4.48442	4.64725	4.7343	4.70375	5.50885	5.49044	5.42206	5.49488	5.53501	5.50561	5.29786	5.1297	5.20268	4.99292	5.25455	5.09498	5.1549	5.07388	5.25693	5.1901	5.25562	5.39382	5.2277	5.21714	5.2606	5.24745	5.25167	5.1879	5.14236	5.12481	5.24568	5.18801	5.15652	5.171	4.55002	4.6951	5.47378	5.51183	5.21008	5.11415	5.1619	5.27985	5.23515	5.22901	5.17095	5.17184
ENSMUSG00000005936	Kctd20	6.44258	6.7282	6.52265	6.67269	6.63784	6.43624	7.42197	7.2385	7.31634	7.38269	7.24752	7.24555	6.91957	6.87657	6.95742	6.81096	6.96478	6.92867	7.06963	7.09467	6.9916	7.03222	7.06506	7.15681	7.00703	7.05377	7.01193	7.06751	7.14418	6.97209	6.63562	6.63861	6.57271	6.70299	6.80262	6.71597	6.56448	6.58225	7.3256	7.29192	6.91785	6.90147	7.05197	7.08469	7.02424	7.06126	6.61565	6.74052
ENSMUSG00000005947	Itgae	NA	NA	NA	NA	NA	NA	2.31124	2.30686	2.3091	2.28396	2.31268	2.30969	NA	NA	NA	NA	NA	NA	2.21394	2.18004	2.20616	2.27118	2.22884	2.17921	2.715	2.57908	2.52552	2.6109	2.56099	2.5705	NA	NA	NA	NA	NA	NA	NA	NA	2.30907	2.30211	NA	NA	2.20005	2.22641	2.60653	2.5808	NA	NA
ENSMUSG00000005949	Ctns	4.07529	4.21553	4.20906	4.26363	4.20914	4.24339	5.32051	5.43243	5.33561	5.36731	5.39048	5.39744	5.56665	5.99802	5.79779	5.7658	5.81375	5.79197	5.15309	5.21473	5.05688	5.15518	5.12406	5.04216	5.71737	5.82499	5.94324	5.78942	5.73669	5.93309	4.96536	5.04818	5.01221	5.04287	4.93487	5.0292	4.16663	4.23872	5.36285	5.38508	5.78749	5.7905	5.14157	5.10714	5.82853	5.81973	5.00859	5.00231
ENSMUSG00000005950	P2rx5	4.03412	3.97461	4.10124	4.08948	4.03986	4.04316	5.04156	5.07253	5.04139	5.02351	5.11327	5.08063	5.08448	5.36648	5.15674	4.95675	5.24448	4.95428	4.7251	4.71495	4.66196	4.67988	4.70395	4.70227	5.20499	5.10936	5.26143	5.09311	5.12791	5.053	4.69199	4.68995	4.64928	4.63243	4.55962	4.59265	4.03665	4.0575	5.05182	5.07247	5.20257	5.05184	4.70067	4.69537	5.19192	5.09134	4.67707	4.5949
ENSMUSG00000005951	Shpk	2.19561	2.04966	2.08496	2.08315	2.03995	2.14441	3.12218	3.16232	3.16428	3.15412	3.18109	3.10761	NA	NA	NA	NA	NA	NA	2.83283	2.8776	2.85143	2.87062	2.84775	2.81468	3.11503	3.00148	3.02743	3.10396	3.0751	2.98432	3.38451	3.37162	3.37632	3.33009	3.39918	3.42342	2.11008	2.08917	3.14959	3.14761	NA	NA	2.85395	2.84435	3.04798	3.05446	3.37748	3.38423
ENSMUSG00000005958	Ephb3	3.72796	3.75383	3.64656	3.79447	3.72592	3.79152	4.91348	5.01448	4.82624	4.96153	5.01177	4.98681	4.94577	5.34639	5.18608	4.95683	5.18019	5.039	4.56811	4.58616	4.55736	4.59128	4.5172	4.48581	5.1337	5.23086	5.27025	4.99673	5.0337	5.10612	4.53074	4.52166	4.65379	4.49068	4.53448	4.51314	3.70945	3.77063	4.91807	4.9867	5.15941	5.05868	4.57054	4.53143	5.2116	5.04552	4.56873	4.51277
ENSMUSG00000005968	Tuft1	5.21204	5.39088	5.16754	5.17332	5.14685	5.20753	5.97547	5.89919	5.96578	5.95147	5.89929	5.98425	5.36321	5.10639	5.00014	5.41123	5.14112	5.1548	5.74348	5.68927	5.79929	5.85218	5.59637	5.77793	5.59822	5.6363	5.63385	5.79001	5.74948	5.76495	5.44304	5.53689	5.50316	5.51875	5.55178	5.52909	5.25682	5.1759	5.94682	5.945	5.15658	5.23572	5.74401	5.74216	5.62279	5.76814	5.49436	5.53321
ENSMUSG00000005973	Rcn1	4.34472	4.26584	4.49339	4.39992	4.38099	4.32187	5.17872	5.38765	5.33706	5.304	5.33355	5.31058	5.44933	5.88705	5.43251	5.63331	5.64962	5.60798	5.43579	5.32513	5.25659	5.38204	5.2755	5.31998	6.11306	6.1477	5.96162	5.87217	5.87706	5.8924	5.03189	5.01795	4.99846	4.8543	4.90469	4.91582	4.36798	4.3676	5.30114	5.31605	5.58963	5.63031	5.33917	5.32584	6.07413	5.88054	5.0161	4.8916
ENSMUSG00000005981	Trap1	8.32	8.39049	8.02099	8.29194	8.26511	8.2739	9.01025	8.84322	9.11022	9.02558	8.96975	9.01298	8.40768	8.2057	8.22066	8.30657	8.28484	8.24995	8.81855	8.72614	8.96325	8.77797	8.79256	9.00419	8.85232	8.55223	8.55957	8.9151	8.91505	8.77916	8.97793	8.82934	8.96033	8.93263	9.08482	9.06561	8.24383	8.27698	8.98789	9.00277	8.27801	8.28045	8.83598	8.85824	8.65471	8.86977	8.92253	9.02769
ENSMUSG00000005982	Naa60	6.42994	6.71846	6.55781	6.60289	6.68004	6.69955	7.54357	7.4383	7.43997	7.58749	7.54915	7.46525	7.09415	7.00127	7.22374	7.0488	7.09159	7.0202	7.21384	7.28498	7.2176	7.22805	7.27672	7.17111	7.34751	7.36131	7.33034	7.39705	7.28902	7.35311	6.57982	6.65669	6.66448	6.74139	6.74912	6.79561	6.56874	6.66083	7.47395	7.53396	7.10638	7.05353	7.2388	7.22529	7.34638	7.34639	6.63366	6.76204
ENSMUSG00000005983	1700037C18Rik	3.49552	3.5016	3.64157	3.38538	3.41766	3.46225	3.72072	3.73236	3.77	3.72728	3.7209	3.74512	3.56415	3.53708	3.45799	3.54246	3.35354	3.48821	3.85956	3.93071	3.89126	3.94976	3.87645	3.92129	4.0475	4.07021	4.03405	4.01847	3.99349	4.01656	3.67538	3.51895	3.58192	3.64643	3.74094	3.65581	3.54623	3.42176	3.74103	3.7311	3.51974	3.4614	3.89384	3.91583	4.05059	4.00951	3.59208	3.68106
ENSMUSG00000005986	Ankrd13d	6.07477	6.08005	5.96117	6.10434	6.25188	6.17021	6.89624	6.87849	7.03608	6.82571	7.0118	6.88879	6.58551	6.3388	6.54101	6.51306	6.58926	6.63539	6.52027	6.49378	6.48316	6.58867	6.39005	6.40205	6.77584	6.63761	6.71262	6.68114	6.70828	6.70898	6.39084	6.3647	6.36975	6.28868	6.47748	6.40764	6.03866	6.17547	6.93694	6.90877	6.48844	6.57924	6.49907	6.46026	6.70869	6.69947	6.3751	6.39127
ENSMUSG00000006005	Tpr	9.49774	9.79907	10.0868	9.90244	9.81997	9.82451	10.9654	11.0507	10.8986	11.0562	10.9657	10.9272	10.6547	10.3898	10.3901	10.3955	10.5831	10.4359	10.7908	10.8305	10.6535	10.8713	10.8268	10.6728	11.2042	11.4107	11.3631	11.2137	11.2825	11.3357	10.9642	11.0579	10.9416	10.8902	10.7437	10.7943	9.79455	9.84897	10.9716	10.983	10.4782	10.4715	10.7582	10.7903	11.326	11.2773	10.9879	10.8094
ENSMUSG00000006010	Odr4	7.58823	7.7829	7.997	8.03565	7.85229	7.78965	8.72338	8.88836	8.83022	8.71316	8.85054	8.81777	8.45106	8.49201	8.44682	8.59104	8.48576	8.37023	8.40672	8.45395	8.18042	8.32581	8.43591	8.40339	8.57511	8.59447	8.66506	8.64492	8.63226	8.67312	8.02776	8.17616	8.03799	8.20422	8.02396	8.0676	7.78938	7.89253	8.81399	8.79382	8.46329	8.48234	8.34703	8.38837	8.61155	8.6501	8.08064	8.09859
ENSMUSG00000006014	Prg4	2.01362	2.17535	2.07882	2.02565	2.04629	2.03995	3.53997	3.46019	3.50679	3.48566	3.49588	3.44418	3.23716	3.34453	3.11309	3.22657	3.26578	3.10691	3.16893	3.22186	3.15336	3.14716	3.17006	3.12566	2.94745	2.92926	3.05797	3.02646	3.08768	3.04954	3.10412	3.15522	3.1368	3.15155	3.08461	3.14805	2.08927	2.0373	3.50232	3.47524	3.23159	3.19975	3.18139	3.14763	2.97823	3.05456	3.13205	3.12807
ENSMUSG00000006019	Dhx34	3.23283	3.15327	3.29912	3.20145	3.34062	3.18657	4.0752	4.04842	3.99779	3.99251	4.02692	3.99693	4.0254	3.83431	4.08391	3.92926	3.9158	4.09123	3.66326	3.6018	3.59583	3.66307	3.64647	3.71721	3.47696	3.46719	3.52063	3.61652	3.4762	3.5802	3.4268	3.38915	3.32287	3.41013	3.44006	3.41184	3.22841	3.24288	4.04047	4.00545	3.98121	3.97877	3.6203	3.67558	3.48826	3.55764	3.3796	3.42068
ENSMUSG00000006021	Kptn	4.27405	4.26635	4.20932	4.42086	4.27253	4.27147	5.29589	5.20492	5.2081	5.2352	5.1745	5.25518	4.53765	4.44774	4.50404	4.54189	4.51337	4.49955	4.5711	4.5971	4.56914	4.63698	4.58233	4.60247	4.9409	4.94608	4.9229	5.04392	5.00801	4.91504	4.40411	4.32238	4.36775	4.31906	4.32224	4.51259	4.24991	4.32162	5.2363	5.22163	4.49648	4.51827	4.57911	4.60726	4.93663	4.98899	4.36474	4.38463
ENSMUSG00000006024	Napa	10.1476	9.87915	9.8752	9.82783	9.88948	9.92044	10.5767	10.3705	10.6824	10.5839	10.4784	10.6285	10.0292	9.89806	9.96454	9.88553	9.95297	9.8674	10.2929	10.1618	10.4786	10.2921	10.2561	10.3215	10.5145	10.1769	10.1469	10.3135	10.3081	10.294	10.103	9.87338	10.0793	10.0249	10.23	10.1726	9.96732	9.87925	10.5432	10.5636	9.96392	9.90196	10.3111	10.2899	10.2794	10.3052	10.0186	10.1425
ENSMUSG00000006050	Sra1	7.6168	7.26761	7.31298	6.99854	7.02598	7.11739	7.95734	7.81359	7.85874	7.97719	7.82755	7.82249	7.29446	7.31792	7.23032	7.35214	7.23317	7.33697	7.94644	7.84462	7.82896	7.83619	7.84309	7.90485	8.11809	7.88429	7.95866	8.0069	8.08295	8.11546	7.853	7.81258	7.59231	7.804	7.85787	7.7287	7.39913	7.0473	7.87655	7.87574	7.2809	7.30743	7.87334	7.86138	7.98701	8.06844	7.75263	7.79686
ENSMUSG00000006057	Atp5g1	4.60138	4.73838	5.09438	4.74341	4.67562	4.61582	5.54112	5.45569	5.4693	5.37627	5.52297	5.54053	5.2629	5.09521	5.16864	5.04143	5.09138	5.20456	5.42721	5.55537	5.41787	5.33737	5.61155	5.47175	5.32228	5.52748	5.41623	5.43974	5.45319	5.48848	4.99885	4.95756	5.13749	5.06395	5.03265	4.79282	4.81138	4.67829	5.48871	5.47992	5.17558	5.11245	5.46682	5.47356	5.42199	5.46047	5.0313	4.96314
ENSMUSG00000006058	Snf8	6.33415	6.3195	6.36661	6.26644	6.35596	6.43267	6.92335	6.92934	6.91676	6.8619	6.9028	6.91421	6.58026	6.45493	6.49255	6.48533	6.44884	6.49478	6.70078	6.69196	6.73511	6.70258	6.57225	6.65309	6.91749	6.86275	6.85193	6.90376	6.90554	6.8926	6.16789	6.00177	6.05891	6.11843	6.07177	6.07604	6.34009	6.35169	6.92315	6.89297	6.50925	6.47631	6.70928	6.64264	6.87739	6.90063	6.07619	6.08875
ENSMUSG00000006095	Tbcb	7.99136	8.0897	8.02435	8.07171	8.14338	8.01502	8.88383	8.77551	8.82221	8.79188	8.83282	8.79633	8.43852	8.35578	8.36485	8.39732	8.40854	8.31913	8.65253	8.51654	8.70387	8.56747	8.56605	8.6076	8.52361	8.71686	8.64129	8.68136	8.61811	8.66857	8.38015	8.3255	8.34738	8.23075	8.4626	8.44935	8.03514	8.0767	8.82718	8.80701	8.38638	8.375	8.62431	8.58037	8.62725	8.65601	8.35101	8.3809
ENSMUSG00000006127	Inpp5k	7.46065	7.21546	6.93164	6.99814	7.13153	7.12586	7.94086	7.80188	7.96904	7.92788	7.86062	7.94225	7.20982	6.95502	7.1452	6.98142	7.08268	7.2521	7.78359	7.79854	7.91486	7.72042	7.80375	7.78613	8.02435	7.80478	7.76827	7.92563	7.95887	7.90145	7.54308	7.47381	7.41046	7.50957	7.5957	7.482	7.20258	7.08518	7.90393	7.91025	7.10335	7.1054	7.83233	7.7701	7.8658	7.92865	7.47578	7.52909
ENSMUSG00000006134	Crkl	7.90352	8.17797	7.79717	7.87944	7.87274	7.95446	8.47924	8.42195	8.52844	8.47548	8.43956	8.4835	8.15792	8.36908	8.37733	8.5881	8.28582	8.3427	8.37077	8.43405	8.4839	8.39466	8.38096	8.36693	8.44558	8.425	8.38629	8.5509	8.54814	8.53265	8.16112	8.17368	8.01895	7.97144	8.13683	7.92452	7.95955	7.90222	8.47654	8.46618	8.30144	8.40554	8.42957	8.38085	8.41895	8.5439	8.11792	8.01093
ENSMUSG00000006154	Eps8l1	1.92257	2.00814	1.9061	2.00851	1.94772	2.01387	2.49462	2.42353	2.4936	2.48507	2.51488	2.56944	3.06426	2.8393	2.96451	3.03888	2.90733	3.01083	NA	NA	NA	NA	NA	NA	2.80461	2.80362	2.87457	2.82684	2.79606	2.77088	2.41185	2.34961	2.36162	2.34251	2.3538	2.43818	1.9456	1.99003	2.47058	2.52313	2.95602	2.98568	NA	NA	2.8276	2.79793	2.37436	2.37816
ENSMUSG00000006169	Clint1	7.64794	7.54856	7.33201	7.40575	7.25942	7.37208	7.8313	7.79188	8.01731	7.89234	7.91757	7.95635	7.63339	7.80163	7.76682	7.91319	7.83121	7.73721	7.62624	7.65584	7.80854	7.62029	7.70452	7.72526	7.93844	7.77657	7.92555	7.90602	7.91604	7.84086	7.90991	7.90403	7.83702	7.70671	7.83515	7.90942	7.5095	7.34575	7.88016	7.92209	7.73395	7.82721	7.69688	7.68336	7.88018	7.88764	7.88365	7.8171
ENSMUSG00000006191	Cdkal1	5.72963	5.84263	5.8649	5.74794	5.7017	5.7533	6.40054	6.26977	6.4201	6.48982	6.4299	6.48044	5.8703	5.86418	5.92066	5.96893	6.01432	5.93059	6.27219	6.09225	6.28734	6.15441	6.25105	6.34663	6.23025	6.03521	6.07186	6.21604	6.19613	6.09397	6.05074	6.12292	6.07502	6.16158	6.11529	6.05886	5.81239	5.73432	6.36347	6.46672	5.88505	5.97128	6.21726	6.25069	6.11244	6.16872	6.08289	6.11191
ENSMUSG00000006204	Cdcp3	NA	NA	NA	NA	NA	NA	NA	NA	NA	NA	NA	NA	1.53215	1.65269	1.65561	1.52174	1.54114	1.69694	NA	NA	NA	NA	NA	NA	NA	NA	NA	NA	NA	NA	NA	NA	NA	NA	NA	NA	NA	NA	NA	NA	1.61348	1.58661	NA	NA	NA	NA	NA	NA
ENSMUSG00000006205	Htra1	10.5596	10.8351	10.9185	10.5608	10.6726	10.8566	11.7187	11.9515	11.7558	11.7515	11.7875	11.9937	11.6553	12.4903	12.2464	12.4365	12.2042	12.1515	11.4464	11.5994	11.3252	11.5457	11.3296	11.2822	11.6075	12.1367	12.3352	11.8386	11.9761	12.056	10.4882	10.9765	10.602	10.4784	10.3536	10.3594	10.7711	10.6967	11.8087	11.8442	12.1307	12.264	11.457	11.3858	12.0264	11.9569	10.6889	10.3972
ENSMUSG00000006215	Zbtb17	5.24548	5.45403	5.08977	5.35622	5.40456	5.41171	6.02772	5.96909	5.97191	5.95042	6.05753	5.994	5.55706	5.60862	5.54872	5.62965	5.66329	5.78443	5.57283	5.72494	5.69215	5.6782	5.70609	5.58676	5.77131	5.77645	5.69066	5.83794	5.85059	5.68311	5.29773	5.27761	5.14575	5.23143	5.52405	5.19482	5.2631	5.39083	5.98957	6.00065	5.57147	5.69246	5.6633	5.65702	5.74614	5.79055	5.24037	5.31677
ENSMUSG00000006218	Fam131c	4.40421	4.21098	3.97963	4.23448	4.22905	4.11859	5.2283	5.21327	5.29863	5.2684	5.20948	5.2192	4.86151	4.95848	4.75612	4.98302	4.72963	5.13684	4.79493	4.79123	4.84241	4.84241	4.70898	4.76152	5.15798	5.22662	5.16613	5.16256	5.07461	5.0518	4.58931	4.56103	4.54018	4.59132	4.59087	4.48941	4.19827	4.19404	5.24673	5.23236	4.8587	4.94983	4.80952	4.77097	5.18358	5.09633	4.56351	4.5572
ENSMUSG00000006219	Fblim1	NA	NA	NA	NA	NA	NA	2.79965	2.77341	2.78073	2.79709	2.79831	2.82752	2.83461	2.74346	2.66183	2.73634	2.7202	2.84995	3.30698	3.26615	3.32155	3.25659	3.25718	3.28068	3.00317	2.82181	2.86332	2.76056	2.76153	2.78705	2.64689	2.62752	2.57077	2.64417	2.64078	2.70325	NA	NA	2.7846	2.80764	2.74663	2.76883	3.29823	3.26482	2.8961	2.76971	2.61506	2.66273
ENSMUSG00000006235	Epor	2.18927	2.1766	2.1888	2.23329	2.23215	2.2243	3.13321	3.13671	3.11076	3.16158	3.1465	3.08982	2.98704	3.16067	3.26981	3.02743	3.21356	3.08554	2.58322	2.63064	2.62986	2.62858	2.60162	2.64118	2.61675	2.48486	2.51539	2.64513	2.59919	2.51249	2.27791	2.25685	2.25473	2.2355	2.27284	2.28365	2.18489	2.22991	3.12689	3.13264	3.13917	3.10884	2.61457	2.62379	2.539	2.5856	2.26316	2.26399
ENSMUSG00000006241	Ccdc159	3.19426	3.1288	3.00976	3.11385	3.07012	3.20852	3.63971	3.60025	3.60524	3.60228	3.61254	3.58365	3.43723	3.27055	3.33611	3.33905	3.38046	3.34124	3.00174	2.98069	3.01751	3.02089	2.98845	3.03356	3.28826	3.19508	3.25935	3.27277	3.19762	3.23607	3.10947	3.05577	3.06701	3.0298	3.06397	3.07401	3.11094	3.13083	3.61507	3.59949	3.34796	3.35358	2.99998	3.0143	3.24756	3.23548	3.07741	3.05593
ENSMUSG00000006262	Mob1b	7.45774	7.46111	7.54043	7.54741	7.44467	7.36754	8.20093	7.96877	8.06689	8.19534	8.02087	8.01442	7.74164	7.75721	7.93428	7.81605	7.77901	7.87315	8.13392	8.07442	8.0748	7.95851	8.13911	8.1575	8.05935	8.21284	8.27299	8.31834	8.25683	8.35667	7.54538	7.51789	7.57003	7.69774	7.38968	7.46011	7.48643	7.45321	8.07886	8.07688	7.81104	7.82274	8.09438	8.08504	8.18173	8.31061	7.54443	7.51584
ENSMUSG00000006270	Vax1	NA	NA	NA	NA	NA	NA	2.54909	2.5438	2.5611	2.56735	2.52171	2.57968	2.50184	2.42898	2.52735	2.44506	2.41872	2.38885	2.91946	2.8888	2.96737	2.85814	2.90413	2.91821	2.6717	2.68975	2.59185	2.65814	2.64289	2.61823	2.61882	2.57075	2.60601	2.58992	2.62544	2.64415	NA	NA	2.55133	2.55625	2.48605	2.41754	2.92521	2.89349	2.6511	2.63975	2.59853	2.61984
ENSMUSG00000006273	Atp6v1b2	11.227	11.2716	11.2132	11.1908	11.1049	11.2468	11.952	11.8652	12.0568	11.9826	11.9375	11.9723	11.5452	11.5613	11.5829	11.5422	11.5644	11.4937	11.8196	11.7336	11.916	11.8452	11.7748	11.9176	12.172	11.8446	11.7813	11.9254	11.9227	11.8344	11.8179	11.7038	11.7512	11.935	11.9294	11.8509	11.2373	11.1808	11.958	11.9641	11.5631	11.5335	11.8231	11.8459	11.9326	11.8942	11.7576	11.9051
ENSMUSG00000006276	Eps15l1	7.6422	7.67002	7.75972	7.61326	7.55886	7.65748	8.28467	8.16339	8.29298	8.34378	8.22012	8.36181	7.81585	7.63336	7.59886	7.6867	7.59852	7.52767	8.19953	8.21636	8.20249	8.20807	8.21009	8.23092	8.50486	8.22306	8.21839	8.32972	8.34352	8.34501	8.54571	8.46607	8.36417	8.39428	8.44052	8.47253	7.69065	7.60987	8.24701	8.30857	7.68269	7.6043	8.20613	8.21636	8.31543	8.33942	8.45865	8.43578
ENSMUSG00000006281	Tep1	5.02754	4.72638	4.91438	4.88222	4.76322	4.79079	5.57691	5.43239	5.46057	5.56289	5.48068	5.52756	5.06522	4.91378	4.87571	4.93111	4.88916	5.09536	5.52988	5.51682	5.43912	5.51147	5.50353	5.47557	5.7228	5.8352	5.85567	5.8893	6.01489	5.9086	5.3652	5.41146	5.45241	5.42561	5.50082	5.43647	4.88944	4.81208	5.48996	5.52371	4.95157	4.97188	5.49528	5.49686	5.80456	5.9376	5.40969	5.4543
ENSMUSG00000006288	Ttc5	5.51034	5.46511	5.46023	5.35273	5.50282	5.55992	5.90362	5.95514	5.98023	5.96399	5.9185	5.88949	5.28588	5.33615	5.3634	5.48871	5.36666	5.15843	5.70673	5.67518	5.96745	5.71427	5.66193	5.70369	5.61097	5.66117	5.67273	5.55907	5.63246	5.56139	5.40157	5.41483	5.35184	5.2449	5.42363	5.24794	5.47856	5.47182	5.94633	5.92399	5.32848	5.33793	5.78312	5.6933	5.64829	5.58431	5.38941	5.30549
ENSMUSG00000006289	Osgep	4.74295	4.84974	4.74414	4.89587	4.93182	4.87324	5.82625	5.73426	5.80654	5.76341	5.82374	5.83068	5.31426	5.41001	5.42224	5.50712	5.34428	5.51226	5.09806	5.03461	5.04644	5.13869	5.13738	5.0457	5.23899	5.27361	5.35174	5.31106	5.28676	5.39123	5.02605	5.07918	4.9883	4.99681	5.04146	5.06207	4.77894	4.90031	5.78902	5.80594	5.38217	5.45455	5.0597	5.10726	5.28812	5.32968	5.03118	5.03345
ENSMUSG00000006299	Aamp	7.85935	7.8942	7.52401	7.99227	8.05116	8.08116	8.70858	8.89694	8.92492	8.56761	8.90383	8.85947	8.36332	8.18776	8.37051	8.31971	8.33426	8.24772	8.13847	8.22915	8.33976	8.37753	8.21359	8.36927	8.41862	8.01056	8.15352	8.2882	8.21429	8.18712	8.05995	7.8989	7.90682	7.9132	8.21725	7.99061	7.75918	8.04153	8.84348	8.77697	8.3072	8.30057	8.23579	8.32013	8.19424	8.22987	7.95522	8.04035
ENSMUSG00000006301	Tmbim1	3.14913	3.06643	2.99326	3.0597	3.02785	3.13653	4.49707	4.47973	4.46385	4.52562	4.4923	4.51546	3.91322	4.00969	3.74379	3.85258	3.95761	3.93249	4.13817	4.02905	3.94541	3.96337	4.02647	4.03898	4.41854	4.45674	4.34355	4.35392	4.41883	4.28493	3.96283	4.04256	4.0838	4.08768	4.09046	4.10294	3.06961	3.07469	4.48022	4.51113	3.8889	3.91422	4.03755	4.00961	4.40628	4.35256	4.02973	4.09369
ENSMUSG00000006304	Arpc2	8.92445	8.90883	8.95861	8.79762	8.68864	8.69888	9.47191	9.39426	9.51741	9.51803	9.52733	9.51274	9.00936	9.03857	9.16314	9.04677	9.02595	9.11494	9.35195	9.3117	9.34505	9.28372	9.333	9.35004	9.38198	9.37385	9.33514	9.44472	9.45985	9.48674	9.00827	9.02081	9.06353	9.10987	9.0275	9.0364	8.93063	8.72838	9.46119	9.51937	9.07036	9.06255	9.33623	9.32225	9.36366	9.46377	9.03087	9.05792
ENSMUSG00000006307	Kmt2b	5.57481	5.5381	5.22788	5.43836	5.43499	5.40052	5.84769	5.64371	5.63101	5.80737	5.72195	5.7508	5.48961	5.53712	5.35809	5.36294	5.48094	5.60317	5.72496	5.74291	5.84304	5.7282	5.64148	5.73378	5.97457	6.11449	5.95962	6.02807	6.04749	5.93251	5.61432	5.58642	5.66395	5.57674	5.56117	5.56785	5.44693	5.42462	5.70747	5.76004	5.46161	5.48235	5.7703	5.70115	6.01623	6.00269	5.62156	5.56859
ENSMUSG00000006315	Tmem147	7.74646	8.08009	7.96225	8.17525	8.09687	8.03564	9.14865	8.98734	8.89666	9.0725	9.08181	8.97551	8.87252	9.20146	8.99073	9.05967	8.92881	8.97545	8.8656	8.83579	8.49841	8.56594	8.67661	8.68946	8.83664	8.89574	8.92259	8.70224	8.943	8.69355	8.09781	8.02753	8.13571	8.15654	8.2024	8.18497	7.9296	8.10258	9.01088	9.04327	9.02157	8.98798	8.73327	8.644	8.88499	8.7796	8.08702	8.1813
ENSMUSG00000006333	Rps9	7.93652	8.18607	7.96378	7.85464	7.99477	7.94423	8.73092	8.55852	8.61764	8.64174	8.50942	8.55728	8.31572	8.26684	8.24923	8.38585	8.29786	8.39273	8.67591	8.79072	8.6908	8.83672	8.66241	8.62348	8.96368	8.95509	8.82061	8.85978	8.82167	8.9823	8.3954	8.35886	8.25436	8.12838	8.00535	8.17435	8.02879	7.93121	8.63569	8.56948	8.27726	8.35881	8.71914	8.70754	8.91313	8.88792	8.33621	8.10269
ENSMUSG00000006335	Tfpt	5.49924	5.48916	5.36139	5.49838	5.43344	5.48107	6.06007	6.05163	6.17406	6.03575	6.02637	6.08039	5.67434	5.38578	5.55569	5.44355	5.43376	5.3629	5.84241	5.67655	5.76079	5.78443	5.73418	5.75976	5.82202	5.81347	5.77674	5.82787	5.86342	5.83407	5.67682	5.66543	5.46344	5.57604	5.53567	5.50696	5.44993	5.47096	6.09525	6.0475	5.5386	5.4134	5.75992	5.75946	5.80408	5.84179	5.6019	5.53955
ENSMUSG00000006342	Susd2	4.61195	4.6841	4.89589	4.93194	4.89333	4.95691	5.97864	6.27972	6.02906	6.05131	6.06763	6.02442	6.03622	6.77249	6.44038	5.97073	6.38328	6.31475	5.90935	5.90114	5.88498	5.98283	5.85953	5.81249	6.60465	6.66176	6.79662	6.26391	6.34602	6.44534	5.88492	5.99397	5.77953	5.85558	5.72956	5.71295	4.73065	4.92739	6.09581	6.04779	6.41636	6.22292	5.89849	5.88495	6.68768	6.35176	5.88614	5.76603
ENSMUSG00000006345	Ggt1	NA	NA	NA	NA	NA	NA	2.15878	2.21865	2.18616	2.14382	2.20853	2.15681	2.94464	3.22764	3.14272	3.19805	2.98604	3.05893	1.89421	1.93191	1.92974	1.90093	1.9195	1.91338	NA	NA	NA	NA	NA	NA	NA	NA	NA	NA	NA	NA	NA	NA	2.18786	2.16972	3.105	3.08101	1.91862	1.91127	NA	NA	NA	NA
ENSMUSG00000006356	Crip2	4.34617	4.19815	4.21948	4.09641	4.05141	4.04372	4.65801	4.45775	4.55403	4.59032	4.467	4.50278	3.89814	3.86337	3.70256	3.69552	3.88816	3.83639	4.3899	4.47419	4.45205	4.46004	4.36739	4.45337	4.47116	4.37451	4.32478	4.33523	4.42459	4.20605	4.58215	4.47597	4.58488	4.6267	4.72155	4.63013	4.2546	4.06385	4.5566	4.52003	3.82136	3.80669	4.43871	4.42694	4.39015	4.32196	4.54767	4.65946
ENSMUSG00000006360	Crip1	NA	NA	NA	NA	NA	NA	NA	NA	NA	NA	NA	NA	NA	NA	NA	NA	NA	NA	NA	NA	NA	NA	NA	NA	1.65004	1.70729	1.71453	1.66227	1.64506	1.66622	1.81472	1.77598	1.78191	1.83963	1.86241	1.78115	NA	NA	NA	NA	NA	NA	NA	NA	1.69062	1.65785	1.79087	1.82773
ENSMUSG00000006362	Cbfa2t3	4.92989	4.96273	4.95409	5.08036	5.09444	5.1769	6.01434	5.94019	6.11618	6.06329	5.96625	6.13693	5.52382	5.45075	5.6073	5.1989	5.37254	5.37606	5.5738	5.51419	5.70275	5.65838	5.63835	5.7175	5.68805	5.55594	5.60297	5.81902	5.57708	5.65534	5.05082	5.10386	5.17483	5.10721	5.00005	5.02617	4.9489	5.11724	6.02357	6.05549	5.52729	5.31583	5.59691	5.67141	5.61565	5.68381	5.10984	5.04448
ENSMUSG00000006369	Fbln1	3.07613	3.06238	2.96402	3.14311	3.10346	3.05514	3.84223	3.82476	3.87812	3.79575	3.86289	3.77779	4.03583	3.91797	3.69618	4.00972	3.88302	3.76311	3.65391	3.564	3.61436	3.64729	3.54724	3.61698	3.58499	3.54834	3.66152	3.6321	3.54789	3.4539	3.36608	3.2228	3.28597	3.3012	3.27186	3.31409	3.03418	3.10057	3.84837	3.81214	3.88332	3.88529	3.61076	3.60384	3.59829	3.54463	3.29161	3.29572
ENSMUSG00000006373	Pgrmc1	8.90426	8.49776	8.67093	8.53473	8.62917	8.79519	9.31027	9.40118	9.38879	9.29268	9.3471	9.28633	9.16691	9.54832	9.44252	9.24359	9.2946	9.39491	8.87835	8.88685	9.0009	8.95471	8.91153	8.89463	9.31045	9.10586	9.24871	9.06743	9.03873	9.11465	8.80483	8.71257	8.68138	8.59766	8.79547	8.75209	8.69098	8.65303	9.36675	9.3087	9.38592	9.31103	8.92203	8.92029	9.22167	9.0736	8.73293	8.71507
ENSMUSG00000006378	Gcat	4.41872	4.2513	4.26136	4.46181	4.34394	4.35863	5.0281	4.95159	4.9775	4.98592	5.01627	4.88627	4.54158	4.46976	4.41524	4.33575	4.66818	4.55555	4.72249	4.6957	4.76698	4.64552	4.686	4.70745	4.79672	4.87267	4.82946	4.97354	4.89562	4.83559	4.37365	4.28459	4.2652	4.2909	4.40565	4.18342	4.31046	4.38812	4.98573	4.96282	4.47553	4.51983	4.72839	4.67966	4.83295	4.90158	4.30782	4.29333
ENSMUSG00000006390	Elovl1	2.46452	2.57301	2.49488	2.53044	2.56711	2.55461	3.42435	3.40735	3.46832	3.43327	3.39177	3.40979	2.79284	2.71293	2.72642	2.88179	2.71101	2.6585	2.7523	2.77292	2.79054	2.78788	2.78813	2.82313	2.97374	2.83667	2.79417	2.79326	2.89367	2.80207	3.00609	2.97743	3.00067	2.9901	3.03397	2.88501	2.5108	2.55072	3.43334	3.41161	2.74406	2.75043	2.77192	2.79971	2.86819	2.82967	2.99473	2.96969
ENSMUSG00000006392	Med8	6.19778	6.2792	6.39835	6.16621	6.28444	6.2278	6.97787	6.91592	6.97319	6.91765	6.85888	7.02664	6.41123	6.29041	6.2767	6.38636	6.346	6.40484	6.55081	6.44123	6.64928	6.4364	6.52849	6.63829	6.63421	6.81539	6.78453	6.87508	6.80534	6.85702	6.24969	6.15974	6.17769	6.21374	6.13338	6.19967	6.29178	6.22615	6.95566	6.93439	6.32611	6.37907	6.54711	6.53439	6.74471	6.84581	6.19571	6.18227
ENSMUSG00000006395	Hyi	3.02383	3.05954	2.95439	3.11457	3.11728	3.2368	3.8967	3.78593	3.73259	3.79039	3.73545	3.68013	3.51278	3.43057	3.33441	3.34474	3.53156	3.40626	3.68055	3.636	3.73053	3.67756	3.67487	3.72287	3.57522	3.56431	3.6009	3.75014	3.64452	3.66202	3.02005	3.04426	2.98089	3.02953	3.08524	2.9887	3.01259	3.15622	3.80508	3.73532	3.42592	3.42752	3.68236	3.69176	3.58014	3.68556	3.01507	3.03449
ENSMUSG00000006398	Cdc20	3.20705	3.27048	3.23928	3.31713	3.34944	3.30228	4.16659	4.20345	4.28935	4.18592	4.22067	4.28608	3.42999	3.58135	3.52958	3.73714	3.80227	3.59048	3.6216	3.78102	3.76257	3.70695	3.70644	3.6646	3.585	3.57845	3.73734	3.70801	3.79073	3.75945	4.2252	4.09661	4.20356	4.20736	4.29418	4.26253	3.23894	3.32295	4.2198	4.23089	3.51364	3.70996	3.72173	3.69266	3.6336	3.75273	4.17513	4.25469
ENSMUSG00000006403	Adamts4	8.45003	8.25758	8.07909	7.94603	8.13503	8.31923	9.1655	9.24106	9.11429	9.05692	9.11288	9.19702	8.94753	9.66575	9.66316	9.74374	9.37775	9.42677	8.59439	8.84394	8.79009	8.62718	8.68389	8.67357	8.9712	9.22169	9.4088	8.988	9.06654	9.25607	8.1942	8.5484	8.06428	7.85012	7.88165	7.9711	8.26223	8.13343	9.17362	9.12227	9.42548	9.51609	8.74281	8.66155	9.20056	9.10353	8.26896	7.90096
ENSMUSG00000006411	Nectin4	5.03366	4.83637	4.73506	4.73606	4.8831	4.93086	5.60419	5.5474	5.65845	5.56931	5.58614	5.48639	5.18256	5.25137	5.05385	5.29641	5.0647	5.17179	5.24646	5.30159	5.43465	5.3022	5.31387	5.29802	5.37525	5.28052	5.41258	5.47035	5.39486	5.52299	5.10431	5.18789	5.09502	5.12396	5.31092	5.21775	4.86836	4.85001	5.60335	5.54728	5.16259	5.17763	5.32757	5.30469	5.35612	5.46273	5.12907	5.21755
ENSMUSG00000006412	Pfdn2	7.78168	7.43197	7.59921	7.24488	7.38474	7.42836	8.0232	8.14381	8.10556	7.99647	7.99367	8.04232	7.67767	7.69305	7.71983	7.76724	7.76291	7.72871	7.73599	7.70449	7.93471	7.89372	7.81853	7.78482	8.37331	8.1961	8.26405	8.20669	8.15341	8.36099	7.76565	7.77387	7.66973	7.63228	7.65338	7.57663	7.60429	7.35266	8.09086	8.01082	7.69685	7.75295	7.79173	7.83236	8.27782	8.24036	7.73642	7.62077
ENSMUSG00000006418	Rnf114	5.86496	5.75213	5.79713	5.77238	5.82387	5.82095	6.22212	6.25577	6.36395	6.22308	6.29947	6.20588	5.95271	6.01051	5.90519	6.05574	5.98506	6.13029	5.90225	6.02169	6.00852	6.14416	5.99923	6.00108	6.30339	6.33219	6.19437	6.27562	6.30649	6.20707	5.72253	5.56896	5.78647	5.66079	5.83124	5.64615	5.80474	5.80573	6.28061	6.24281	5.95614	6.05703	5.97749	6.04816	6.27665	6.26306	5.69265	5.71273
ENSMUSG00000006423	C330007P06Rik	3.97014	4.05912	4.18866	4.04249	3.99753	4.03042	4.66826	4.73472	4.72023	4.81626	4.7997	4.86168	4.15713	4.22993	4.11135	4.3251	4.18356	4.14001	4.38329	4.25088	4.31474	4.34152	4.31177	4.25245	5.10159	4.81486	4.85687	4.85382	4.85735	4.85146	4.12994	4.19856	4.07936	4.10053	4.183	4.25212	4.07264	4.02348	4.70774	4.82588	4.16614	4.21622	4.31631	4.30191	4.92444	4.85421	4.13595	4.17855
ENSMUSG00000006435	Neurl1a	5.79426	5.72736	5.71435	5.84747	5.91871	5.79342	6.75764	6.63885	6.57974	6.76982	6.64228	6.76681	6.08564	6.07878	6.29019	5.78047	6.17836	6.11165	6.30149	6.19734	6.40477	6.2128	6.2493	6.29398	6.25513	6.29537	6.3979	6.30267	6.29575	6.21582	5.85746	5.92777	6.05557	5.80341	5.91752	5.9765	5.74533	5.8532	6.65874	6.7263	6.15154	6.0235	6.3012	6.25203	6.31613	6.27142	5.94693	5.89915
ENSMUSG00000006442	Srm	6.41112	6.28906	5.98325	6.31845	6.42559	6.49921	7.19808	7.2222	7.24452	7.26907	7.28696	7.34682	6.55048	6.31936	6.33696	6.4233	6.4642	6.61536	6.62678	6.59543	6.60574	6.55001	6.52777	6.72449	6.69984	6.69042	6.59075	6.73052	6.80491	6.63089	6.44521	6.50837	6.35813	6.48983	6.57515	6.45589	6.22781	6.41442	7.2216	7.30095	6.40227	6.50095	6.60932	6.60076	6.66034	6.72211	6.43724	6.50696
ENSMUSG00000006445	Epha2	NA	NA	NA	NA	NA	NA	2.95844	2.96293	2.92153	2.94494	2.91927	2.95453	3.10408	3.4504	3.16561	2.9775	3.36325	3.11851	NA	NA	NA	NA	NA	NA	2.57384	2.53044	2.62666	2.52928	2.47893	2.50833	NA	NA	NA	NA	NA	NA	NA	NA	2.94764	2.93958	3.24003	3.15309	NA	NA	2.57698	2.50551	NA	NA
ENSMUSG00000006456	Rbm14	4.25109	4.36302	4.29298	4.35388	4.3678	4.35631	5.27867	5.21915	5.16006	5.26204	5.2485	5.13031	5.35111	5.74402	5.88677	5.77646	5.84709	5.75258	5.13734	5.17332	5.33499	5.16211	5.24092	5.20225	5.23577	5.22901	5.12854	5.09431	5.10855	5.0634	5.74506	5.63524	5.61068	5.61781	5.85022	5.67784	4.30236	4.35933	5.21929	5.21362	5.66063	5.79204	5.21522	5.20176	5.19777	5.08875	5.66366	5.71529
ENSMUSG00000006457	Actn3	1.97264	1.88671	1.88151	1.91526	1.95881	2.06037	3.10766	3.10845	3.16058	3.11489	3.22829	3.14623	2.30218	2.52497	2.34701	2.47651	2.49259	2.35724	1.99079	2.03533	1.9969	1.99766	2.00802	2.05627	3.00729	3.0446	3.07199	3.04015	2.96153	3.0634	2.13422	2.08413	2.13595	2.10574	2.12937	2.09157	1.91362	1.97815	3.12556	3.16314	2.39139	2.44211	2.00767	2.02065	3.04129	3.02169	2.1181	2.10889
ENSMUSG00000006463	Zdhhc24	3.69716	3.53202	3.30417	3.43134	3.35702	3.40339	4.24587	4.25112	4.22853	4.31778	4.26156	4.22169	4.01938	4.15936	4.1061	4.18648	3.99316	3.99888	4.13077	4.06978	4.02966	4.05772	4.09172	4.03895	4.51302	4.36804	4.44549	4.35515	4.4699	4.4234	3.89773	3.92886	3.81506	3.92645	3.89651	3.86676	3.51112	3.39725	4.24184	4.26701	4.09495	4.05951	4.07674	4.0628	4.44219	4.41615	3.88055	3.89658
ENSMUSG00000006464	Bbs1	4.36686	4.69451	4.58863	4.60002	4.66901	4.76922	5.36045	5.41507	5.39454	5.39612	5.37674	5.3365	5.21987	5.15024	5.14856	5.10817	5.23775	5.19316	5.28494	5.27144	5.28686	5.2262	5.31985	5.39993	5.20502	5.10944	4.9983	5.21165	5.16795	5.15795	5.27184	5.19592	5.2285	5.23299	5.47674	5.35336	4.55	4.67942	5.39002	5.36978	5.17289	5.17969	5.28108	5.31533	5.10425	5.17919	5.23208	5.35437
ENSMUSG00000006471	Ndor1	NA	NA	NA	NA	NA	NA	2.5394	2.46663	2.58493	2.45117	2.48089	2.4845	NA	NA	NA	NA	NA	NA	2.24591	2.28619	2.25868	2.24325	2.30092	2.26703	1.61966	1.63619	1.75724	1.70757	1.6746	1.61449	NA	NA	NA	NA	NA	NA	NA	NA	2.53032	2.47219	NA	NA	2.26359	2.2704	1.67103	1.66555	NA	NA
ENSMUSG00000006476	Nsmf	6.92927	6.81198	6.68494	6.76126	6.9315	6.81874	7.52807	7.62314	7.57838	7.44893	7.52499	7.59657	7.5935	7.75977	7.81676	7.75009	7.78834	7.78229	7.18821	7.27586	7.15894	7.25106	7.28554	7.32667	7.61806	7.468	7.55205	7.28695	7.391	7.44992	7.09114	7.13814	7.11808	7.02701	7.25011	7.14715	6.80873	6.83717	7.57653	7.5235	7.72335	7.77357	7.20767	7.28776	7.54604	7.37595	7.11579	7.14143
ENSMUSG00000006494	Pdk1	5.48347	5.27386	5.2562	5.2791	5.33612	5.2515	6.1524	6.18755	6.1262	6.1638	6.1412	6.20284	5.63356	5.32681	5.28383	5.23181	5.33696	5.38767	5.94349	5.77715	5.86394	5.80216	5.7909	6.01075	5.93462	6.05568	5.85602	5.97255	5.88046	5.89719	5.57453	5.37451	5.43265	5.54532	5.53738	5.56356	5.33784	5.28891	6.15538	6.16928	5.41473	5.31882	5.86153	5.86794	5.94878	5.91674	5.46056	5.54875
ENSMUSG00000006498	Ptbp1	3.74913	3.53781	3.50028	3.48524	3.49965	3.5155	3.86653	3.84981	3.88989	3.88576	3.83032	3.88009	3.19635	3.16808	3.17295	3.23582	3.20968	3.24306	3.12854	3.15208	3.14522	3.0852	3.09268	3.06303	3.71651	3.73179	3.68425	3.63857	3.65528	3.75143	3.79631	3.69972	3.78021	3.74403	3.81689	3.72317	3.59574	3.50013	3.86874	3.86539	3.17912	3.22952	3.14195	3.0803	3.71085	3.68176	3.75875	3.76136
ENSMUSG00000006517	Mvd	4.49973	4.55122	4.31983	4.43798	4.50064	4.56392	5.3355	5.23878	5.3088	5.2558	5.2924	5.3437	4.65013	4.64651	4.62195	4.66582	4.52313	4.45213	4.97082	5.00205	4.9451	4.91085	4.92696	4.86673	4.79335	4.70888	4.71689	4.714	4.69409	4.77374	4.70624	4.67233	4.6054	4.57259	4.61609	4.67369	4.45692	4.50085	5.29436	5.2973	4.63953	4.54703	4.97266	4.90151	4.7397	4.72728	4.66132	4.62079
ENSMUSG00000006522	Itih3	4.0727	4.03586	4.05578	4.02974	3.92837	3.99317	5.66668	5.66134	5.46161	5.49337	5.58114	5.45743	5.39521	5.78552	5.26201	5.24227	5.41371	5.10332	4.60505	4.62617	4.5098	4.52378	4.66924	4.576	5.31449	5.2537	5.33219	5.12339	5.35934	4.98743	5.00278	4.93089	4.94597	4.92423	5.11274	4.94688	4.05478	3.98376	5.59654	5.51064	5.48091	5.2531	4.58034	4.58967	5.30013	5.15672	4.95988	4.99462
ENSMUSG00000006526	Stimate	4.75826	4.80636	5.03796	4.97888	4.96458	4.82404	5.73588	5.98802	5.83072	5.87709	5.8617	5.93613	5.92028	6.47854	6.03472	6.25996	6.28902	6.27119	5.61576	5.73362	5.58228	5.66789	5.51537	5.58649	5.75295	5.92389	6.00852	5.89668	5.84782	5.93538	4.99099	5.01464	5.06922	4.88274	4.84151	4.90035	4.86753	4.9225	5.85154	5.89164	6.14452	6.27339	5.64389	5.58992	5.89512	5.89329	5.02495	4.87487
ENSMUSG00000006527	Sfmbt1	6.55792	6.35912	6.4038	6.45669	6.33971	6.21283	7.14942	7.18103	7.10975	7.1699	7.11233	6.93533	6.75374	6.52607	6.6783	6.5111	6.56086	6.64442	7.00444	7.06713	7.10027	7.05337	7.12842	7.06724	7.31622	7.31399	7.19529	7.39966	7.26077	7.18188	6.9157	6.96424	6.98041	6.88607	6.83091	6.97953	6.44028	6.33641	7.14673	7.07252	6.65271	6.57213	7.05728	7.08301	7.27517	7.28077	6.95345	6.89884
ENSMUSG00000006546	Cryba2	NA	NA	NA	NA	NA	NA	2.84345	2.83428	2.87446	2.85872	2.78577	2.85766	2.95137	2.79257	2.84533	2.82738	2.84353	2.77241	2.97875	2.94301	2.87466	2.91124	2.87066	2.8433	2.37194	2.4002	2.434	2.43299	2.35083	2.42354	NA	NA	NA	NA	NA	NA	NA	NA	2.85073	2.83405	2.86309	2.81444	2.93214	2.87507	2.40205	2.40246	NA	NA
ENSMUSG00000006567	Atp7b	2.96795	3.04299	3.00642	3.01935	3.03827	3.07731	3.5091	3.56804	3.45004	3.46575	3.51859	3.51475	3.48076	3.55445	3.56013	3.56039	3.57751	3.46882	3.29044	3.22034	3.26243	3.27401	3.29603	3.24194	3.50373	3.56977	3.53188	3.66896	3.60405	3.43944	3.42035	3.36654	3.38894	3.44055	3.44665	3.45956	3.00578	3.04498	3.50906	3.4997	3.53178	3.53557	3.25774	3.27066	3.53513	3.57082	3.39194	3.44892
ENSMUSG00000006575	Rundc3a	8.13249	7.91656	7.78307	7.85855	7.89482	7.9853	8.67498	8.6109	8.72523	8.58379	8.7358	8.69702	8.20978	8.02687	8.16336	8.21811	8.18675	8.22681	8.31701	8.2467	8.40327	8.25117	8.20286	8.32324	8.50039	8.45084	8.28217	8.53064	8.51885	8.36066	7.94429	7.82802	7.83204	7.77107	7.85762	7.84175	7.94404	7.91289	8.67037	8.6722	8.13334	8.21056	8.32233	8.25909	8.41113	8.47005	7.86812	7.82348
ENSMUSG00000006576	Slc4a3	7.90515	7.76511	7.89461	7.88799	7.97731	7.81219	8.76339	8.91011	8.72007	8.86173	8.85411	8.9462	8.65329	8.80367	8.6493	8.86061	8.72138	8.71517	8.35605	8.42772	8.61274	8.45584	8.27629	8.49477	8.73973	8.67863	8.91612	8.60401	8.67286	8.63765	8.11891	8.13611	8.14355	7.95642	8.07248	8.08825	7.85496	7.89249	8.79786	8.88735	8.70209	8.76572	8.4655	8.40896	8.77816	8.63817	8.13286	8.03905
ENSMUSG00000006585	Cdt1	2.98237	2.95849	2.89082	2.84795	2.90412	2.99572	3.64084	3.56227	3.62192	3.73466	3.61502	3.65383	2.77966	2.77567	2.88852	2.63372	2.83466	2.70952	3.596	3.60866	3.62056	3.52744	3.5688	3.58481	3.47064	3.43921	3.47865	3.58969	3.41786	3.55349	3.44957	3.46414	3.45128	3.39582	3.48628	3.38729	2.94389	2.91593	3.60834	3.66784	2.81462	2.72597	3.60841	3.56035	3.46283	3.52035	3.455	3.42313
ENSMUSG00000006586	Runx1t1	6.4694	6.31597	6.35222	6.31952	6.40875	6.44169	6.84775	6.82168	7.02086	6.87825	6.95355	6.87263	6.52591	6.61004	6.73575	6.44321	6.52987	6.65402	6.75491	6.72625	6.78768	6.80016	6.75864	6.82468	6.95472	7.02454	6.99104	6.91623	7.00086	6.99087	6.43606	6.32581	6.53096	6.38757	6.44015	6.43469	6.3792	6.38999	6.89677	6.90148	6.6239	6.54237	6.75628	6.79449	6.9901	6.96932	6.43094	6.4208
ENSMUSG00000006589	Aprt	5.87772	5.74011	5.61585	5.64531	5.57808	5.75931	6.36235	6.27393	6.46304	6.34118	6.36169	6.3964	5.84736	5.72274	5.90852	5.82469	5.83096	5.87264	6.05103	6.03791	6.13569	6.00394	6.02017	6.08176	6.40987	6.28727	6.20102	6.34999	6.28156	6.15541	5.77368	5.81757	5.87668	5.87665	5.8367	5.83137	5.74456	5.6609	6.36644	6.36642	5.82621	5.84276	6.07488	6.03529	6.29939	6.26232	5.82264	5.84824
ENSMUSG00000006599	Gtf2h1	6.27403	6.53656	6.64164	6.43523	6.43512	6.29628	7.2428	7.13582	7.18098	7.24576	7.18675	7.24761	6.6261	6.56525	6.54398	6.55439	6.565	6.62641	7.00806	6.97619	6.99432	6.96031	7.15556	7.07037	7.07491	7.13906	7.09385	7.13029	7.17357	7.11253	6.72947	6.68472	6.63486	6.81518	6.62673	6.65965	6.48408	6.38888	7.18653	7.2267	6.57844	6.58193	6.99285	7.06208	7.10261	7.1388	6.68302	6.70052
ENSMUSG00000006611	Hfe	4.46123	4.27968	4.11368	4.21732	4.23807	4.26633	5.16168	5.1776	5.10025	5.19633	5.13014	5.17175	4.8575	5.15364	5.01339	5.17115	4.93025	4.99547	4.78014	4.75796	4.70771	4.69262	4.71221	4.76261	5.50236	5.57656	5.64819	5.49149	5.66464	5.37662	4.30048	4.33376	4.37229	4.41272	4.34066	4.3064	4.28486	4.24057	5.14651	5.16607	5.00818	5.03229	4.74861	4.72248	5.57571	5.51092	4.33551	4.35326
ENSMUSG00000006638	Abhd1	NA	NA	NA	NA	NA	NA	2.40714	2.40126	2.35837	2.41529	2.40752	2.38232	NA	NA	NA	NA	NA	NA	NA	NA	NA	NA	NA	NA	NA	NA	NA	NA	NA	NA	NA	NA	NA	NA	NA	NA	NA	NA	2.38892	2.40171	NA	NA	NA	NA	NA	NA	NA	NA
ENSMUSG00000006641	Slc5a6	5.87561	5.74841	5.69874	5.79895	5.94864	6.03612	6.976	7.16359	6.94395	6.89204	7.03435	6.94292	7.07274	7.61259	7.47579	7.539	7.3075	7.33863	6.70593	6.76996	6.58117	6.77757	6.62652	6.6866	7.07225	7.19376	7.37403	7.01907	6.94921	7.08903	6.17882	6.29526	6.34912	6.20539	6.15845	6.24981	5.77425	5.9279	7.02785	6.95644	7.38704	7.39504	6.68568	6.6969	7.21334	7.0191	6.2744	6.20455
ENSMUSG00000006651	Aplp1	10.7347	10.5368	10.4841	10.5028	10.7188	10.7302	11.7105	11.8926	11.5686	11.6788	11.7573	11.7152	11.686	12.4695	12.1847	12.1688	12.1484	12.0998	11.2824	11.3746	11.3022	11.3469	11.1647	11.1273	11.6243	11.9693	12.1456	11.7398	11.7097	11.8072	10.8093	11.0257	10.8157	10.7847	10.8388	10.8898	10.5852	10.6506	11.7239	11.7171	12.1134	12.139	11.3197	11.2129	11.913	11.7523	10.8836	10.8377
ENSMUSG00000006673	Qrich1	8.88342	8.79593	8.75435	8.7982	8.85606	8.84244	9.62128	9.56672	9.57651	9.68366	9.59174	9.63877	9.0963	8.7408	8.78239	8.81638	8.96637	8.96213	9.33676	9.28409	9.24728	9.40748	9.31897	9.3667	9.50836	9.49401	9.41075	9.56851	9.51661	9.4853	9.14996	9.08612	9.13731	9.14704	9.19843	9.10895	8.81124	8.83223	9.58817	9.63806	8.87317	8.91496	9.28938	9.36439	9.47104	9.52347	9.12446	9.15147
ENSMUSG00000006675	P4htm	9.17166	8.91415	8.95938	8.83381	9.02367	9.03464	9.90549	10.009	9.87374	9.869	9.88352	9.96814	9.71593	10.2753	10.0476	10.1688	10.0503	9.89695	9.53339	9.61009	9.46933	9.57608	9.37495	9.39497	9.83905	10.0359	10.1062	9.86712	9.91894	9.86888	9.21003	9.11764	9.14726	9.10165	9.23924	9.25457	9.01506	8.96404	9.92941	9.90689	10.0129	10.0387	9.5376	9.44867	9.99371	9.88498	9.15831	9.19848
ENSMUSG00000006676	Usp19	7.72369	7.70892	7.61915	7.64787	7.67142	7.73722	8.30359	8.13138	8.32154	8.2759	8.24562	8.14893	7.59138	7.63153	7.48852	7.60371	7.66872	7.60089	8.0474	7.95061	8.3247	7.85347	7.94943	8.19578	8.17791	7.98419	7.9591	8.10994	8.04542	8.08908	8.41309	8.36493	8.30553	8.30267	8.50038	8.43782	7.68392	7.68551	8.25217	8.22349	7.57048	7.62444	8.10757	7.99956	8.0404	8.08148	8.36118	8.41362
ENSMUSG00000006678	Pola1	4.07581	4.17432	4.02527	4.09819	4.08508	4.10741	4.78557	4.65791	4.70041	4.773	4.64875	4.67775	4.2883	4.26739	4.07374	4.04012	4.14816	4.05366	4.98443	4.92237	4.98306	4.9843	5.01565	4.99731	5.23423	4.86109	4.93112	4.93912	5.03831	4.93396	4.93151	4.87109	4.84748	4.85343	4.85208	4.88844	4.0918	4.09689	4.71463	4.69983	4.20981	4.08065	4.96328	4.99909	5.00881	4.97046	4.88336	4.86465
ENSMUSG00000006699	Cdc42	9.83043	9.92837	10.1889	10.1838	10.0339	9.97882	10.8231	10.7443	10.9089	10.795	10.8514	10.9073	10.4083	10.2814	10.2858	10.3584	10.3921	10.3491	10.6161	10.4874	10.4705	10.5608	10.6559	10.6134	10.5851	10.7303	10.6502	10.8152	10.8584	10.8235	10.2134	10.1605	10.2437	10.3978	10.2656	10.3309	9.98257	10.0655	10.8254	10.8512	10.3252	10.3665	10.5247	10.61	10.6552	10.8323	10.2059	10.3314
ENSMUSG00000006705	Pknox1	5.58556	5.73389	5.82989	5.87164	5.71441	5.71784	6.75453	6.65911	6.61257	6.60292	6.58526	6.60718	6.20241	6.07901	6.21676	6.13157	6.10652	6.24427	6.23672	6.37495	6.33975	6.35414	6.39142	6.43005	6.53378	6.52702	6.38328	6.5443	6.61453	6.36253	5.80253	5.9601	5.9351	5.84414	5.91392	5.66754	5.71645	5.76796	6.6754	6.59845	6.16606	6.16079	6.31714	6.39187	6.48136	6.50712	5.89925	5.80853
ENSMUSG00000006711	D130043K22Rik	7.02906	7.04071	7.11929	7.09145	7.12209	7.19731	8.31565	8.59136	8.15971	8.28703	8.26319	8.24646	8.48809	9.29058	9.03137	8.82069	8.9563	8.72864	8.13538	8.20894	7.89685	8.07764	8.07796	7.96371	8.79291	9.2196	9.30372	8.81308	8.75202	9.07005	8.12136	8.63703	8.1543	8.29885	7.99307	8.1985	7.06302	7.13695	8.35557	8.26556	8.93668	8.83521	8.08039	8.03977	9.10541	8.87839	8.30423	8.16348
ENSMUSG00000006715	Gmnn	5.55879	5.55322	5.64406	5.50251	5.42154	5.36739	6.14041	6.09942	6.1194	6.20412	6.1248	6.23047	6.03	5.59795	5.87797	5.77143	5.82753	5.76562	6.13808	6.15382	6.04335	6.12055	6.17822	6.18823	6.4275	6.23102	6.13158	6.09029	6.40101	6.21114	5.84551	5.7438	5.79095	5.93765	5.6896	5.66915	5.58536	5.43048	6.11974	6.18647	5.8353	5.7882	6.11175	6.16234	6.26336	6.23415	5.79342	5.76547
ENSMUSG00000006717	Acot13	9.04098	9.20309	9.37021	9.17157	9.11504	9.00045	9.9356	9.74646	9.94076	9.8796	9.77106	9.89836	9.47134	9.20633	9.14689	9.24182	9.14483	9.29472	9.84271	9.8653	9.97085	9.8983	9.84843	9.92451	10.0204	9.82002	9.7131	9.9012	10.0121	9.80471	9.3576	9.25967	9.3777	9.40637	9.37437	9.33534	9.20476	9.09568	9.87427	9.84968	9.27485	9.22712	9.89295	9.89041	9.85117	9.90601	9.33165	9.37203
ENSMUSG00000006720	Zfp184	NA	NA	NA	NA	NA	NA	2.49582	2.4726	2.46002	2.52988	2.49602	2.4719	NA	NA	NA	NA	NA	NA	2.39807	2.35742	2.39151	2.33347	2.38934	2.3697	1.83054	1.82395	1.93193	1.91487	1.94815	1.86794	2.6602	2.588	2.60867	2.56594	2.66493	2.5842	NA	NA	2.47614	2.49927	NA	NA	2.38233	2.36417	1.86214	1.91032	2.61896	2.60502
ENSMUSG00000006728	Cdk4	5.65497	5.61796	5.5465	5.58163	5.61061	5.44105	6.41584	6.31412	6.34079	6.43719	6.34794	6.42249	6.07718	5.9171	5.85994	5.86185	5.94731	5.80026	6.2369	6.27213	6.24186	6.17071	6.2775	6.27913	6.14321	6.167	6.35277	6.43997	6.46807	6.21209	6.29823	6.08831	6.26572	6.24952	6.22919	6.15504	5.60648	5.54443	6.35692	6.40254	5.95141	5.86981	6.2503	6.24245	6.22099	6.37338	6.21742	6.21125
ENSMUSG00000006731	B4galnt1	6.59921	6.86651	6.7778	6.73247	6.88512	6.90142	7.84863	7.92195	7.69059	7.84174	7.86939	7.77191	7.79773	8.16035	8.21621	8.00747	7.92178	8.08052	7.60274	7.69611	7.6079	7.52325	7.58085	7.52484	7.89839	8.10823	8.2989	7.95749	7.92945	8.0366	7.27762	7.37897	7.2587	7.29538	7.32601	7.25691	6.74784	6.83967	7.82039	7.82768	8.05809	8.00326	7.63558	7.54298	8.10184	7.97451	7.3051	7.29277
ENSMUSG00000006732	Mettl1	4.18137	3.92092	4.10138	4.14854	4.05127	4.03614	4.73136	4.74029	4.83437	4.7943	4.76246	4.82808	4.46519	4.3849	4.56272	4.4985	4.53051	4.45952	4.60064	4.57689	4.68482	4.6666	4.64873	4.65095	4.98903	4.77616	4.67832	4.68775	4.69094	4.74735	4.40524	4.40632	4.39075	4.39801	4.52863	4.28534	4.06789	4.07865	4.76867	4.79495	4.47094	4.49618	4.62078	4.65543	4.8145	4.70868	4.40077	4.40399
ENSMUSG00000006736	Tspan31	7.15699	7.06437	7.13557	7.20974	7.17592	7.15429	8.43702	8.42608	8.14177	8.45595	8.41353	8.22019	8.29967	8.89406	8.73389	8.80278	8.74974	8.66346	8.20276	8.15862	7.88287	8.0253	8.13387	8.03313	8.1314	8.69138	8.79545	8.51524	8.50602	8.63066	7.64534	7.99431	7.78309	7.66672	7.58414	7.651	7.11898	7.17998	8.33496	8.36322	8.64254	8.73866	8.08142	8.0641	8.53941	8.55064	7.80758	7.63395
ENSMUSG00000006740	Kif5b	9.96822	10.0339	10.3794	10.0728	9.88376	9.80206	11.034	10.926	10.7203	11.0373	10.9515	10.8625	10.5751	10.3382	10.3103	10.2201	10.2802	10.4178	10.966	11.0077	10.9105	10.9328	11.0787	11.0134	11.2208	11.3787	11.3402	11.2674	11.3602	11.345	10.7338	10.7652	10.7479	10.8562	10.6557	10.6997	10.1272	9.91953	10.8934	10.9504	10.4078	10.306	10.9614	11.0083	11.3132	11.3242	10.749	10.7372
ENSMUSG00000006763	Saal1	5.58751	5.45027	5.37355	5.38793	5.34538	5.57108	5.86974	5.69832	5.85877	5.79412	5.81638	5.90896	5.34146	5.07026	5.24723	5.18557	5.32691	5.00341	5.4122	5.51587	5.53784	5.52894	5.50304	5.55017	5.42506	5.3245	5.40945	5.37839	5.36418	5.37094	5.0489	4.81416	4.98938	4.96273	5.06922	4.96997	5.47044	5.4348	5.80894	5.83982	5.21965	5.17196	5.48864	5.52738	5.38634	5.37117	4.95081	5.00064
ENSMUSG00000006764	Tph2	NA	NA	NA	NA	NA	NA	2.96969	2.98835	3.02166	2.94064	3.05802	3.00609	NA	NA	NA	NA	NA	NA	1.95115	1.90257	1.96657	1.94914	1.97078	1.97384	2.52364	2.57474	2.69905	2.60548	2.59052	2.53758	2.83735	2.81859	2.77383	2.873	2.85622	2.89471	NA	NA	2.99323	3.00158	NA	NA	1.9401	1.96459	2.59914	2.57786	2.80992	2.87464
ENSMUSG00000006782	Cnp	6.90379	6.73404	6.50434	6.44914	6.48575	6.55675	7.08773	7.11704	7.21296	7.10055	7.13176	6.97573	6.95946	6.96965	6.81974	6.81345	6.73008	6.76375	6.77235	6.7111	6.7196	6.59346	6.81767	6.85759	6.74631	6.4932	6.56784	6.50588	6.58518	6.37011	6.79604	6.58065	6.679	6.73387	6.96318	6.75238	6.71406	6.49721	7.13924	7.06934	6.91629	6.7691	6.73435	6.75624	6.60245	6.48706	6.68523	6.81648
ENSMUSG00000006784	Ttc25	2.32768	2.23115	2.14878	2.20245	2.18068	2.1043	2.47775	2.45419	2.4666	2.44958	2.49605	2.468	NA	NA	NA	NA	NA	NA	2.31281	2.25341	2.27991	2.30785	2.22595	2.26127	2.38462	2.25379	2.32129	2.28638	2.32143	2.32993	2.65975	2.63949	2.62289	2.65725	2.69221	2.72925	2.23587	2.16248	2.46618	2.47121	NA	NA	2.28204	2.26502	2.3199	2.31258	2.64071	2.6929
ENSMUSG00000006800	Sulf2	8.22931	8.28241	8.37733	8.24441	8.28459	8.41696	9.51023	9.67335	9.45622	9.58283	9.46021	9.43661	9.75869	10.4455	10.4138	10.0489	10.0949	9.98473	9.56063	9.56725	9.4821	9.62442	9.5781	9.43072	10.3121	10.5299	10.3699	10.086	10.0256	10.3385	9.24672	9.4902	9.13851	9.24795	9.13182	9.23693	8.29635	8.31532	9.5466	9.49322	10.206	10.0429	9.53666	9.54441	10.404	10.15	9.29181	9.20557
ENSMUSG00000006818	Sod2	10.4758	10.5892	10.7019	10.3856	10.3544	10.4207	11.1998	11.0608	11.2335	11.2435	11.0905	11.1595	10.798	10.8478	10.8804	10.8595	10.7712	10.8227	11.1522	11.2008	11.1293	11.204	11.1223	11.2339	11.5137	11.2777	11.2501	11.3257	11.3736	11.3482	10.8004	10.7453	10.7569	10.742	10.6252	10.6647	10.589	10.3869	11.1647	11.1645	10.8421	10.8178	11.1607	11.1868	11.3472	11.3491	10.7675	10.6773
ENSMUSG00000006850	Tmco6	3.46388	3.40594	3.57896	3.63386	3.50162	3.55433	4.28607	4.27507	4.32601	4.23488	4.27752	4.34485	3.85928	3.6712	3.71054	3.79733	3.66251	3.78144	3.89536	3.81049	3.93028	3.89064	3.87457	3.83867	4.11623	3.99336	3.97556	4.11944	3.98996	4.0611	3.14578	3.16932	3.09504	3.23063	3.29393	3.20326	3.48293	3.56327	4.29572	4.28575	3.747	3.7471	3.87871	3.86796	4.02838	4.05683	3.13671	3.24261
ENSMUSG00000006906	Stambp	7.11076	6.80213	6.96976	6.94168	6.68954	6.86442	7.70254	7.7052	7.76889	7.70261	7.675	7.75797	7.17005	6.8787	7.00476	6.93434	7.01642	7.17664	7.48342	7.46732	7.45759	7.48006	7.48643	7.53436	7.6233	7.48204	7.48986	7.67603	7.59785	7.5072	7.16122	7.11154	7.22532	7.18944	7.06467	7.06659	6.96088	6.83188	7.72554	7.71186	7.01784	7.04247	7.46944	7.50028	7.53173	7.59369	7.16603	7.1069
ENSMUSG00000006920	Ezh1	7.27872	7.20288	7.2683	7.41943	7.40354	7.51162	8.17695	8.37315	8.3991	8.13522	8.37883	8.33459	7.80651	7.82203	7.72631	7.81146	7.88608	7.82275	7.69465	7.60225	7.80182	7.76738	7.67999	7.62982	7.75568	7.86824	7.97964	7.94037	7.95039	7.81557	7.65773	7.56677	7.65209	7.56498	7.78085	7.70559	7.24997	7.44486	8.3164	8.28288	7.78495	7.8401	7.69957	7.69239	7.86785	7.90211	7.62553	7.68381
ENSMUSG00000006930	Hap1	6.77687	6.7679	6.59072	6.94095	6.88578	6.84287	7.48217	7.53159	7.45125	7.51846	7.49827	7.5656	7.20942	7.062	6.94174	6.91266	7.07676	7.04278	7.26769	7.16158	7.4652	7.26003	7.17286	7.38736	7.34897	7.22614	7.31204	7.28736	7.29043	7.14483	7.05429	6.94707	6.96659	6.94547	7.03685	7.14208	6.71183	6.88986	7.48834	7.52744	7.07105	7.01073	7.29816	7.27341	7.29572	7.24087	6.98932	7.04147
ENSMUSG00000006931	P3h4	3.62472	3.56862	3.71734	3.60926	3.62349	3.61286	4.54361	4.60515	4.57907	4.63147	4.52529	4.58946	4.60435	4.84202	4.7632	4.61269	4.70802	4.56501	3.90046	3.87045	3.83601	3.86785	3.83678	3.84879	4.45569	4.52985	4.72893	4.62851	4.63183	4.66876	3.6974	3.628	3.62651	3.6452	3.60365	3.61076	3.63689	3.6152	4.57594	4.58208	4.73652	4.62857	3.86897	3.85114	4.57149	4.64303	3.65064	3.61987
ENSMUSG00000006932	Ctnnb1	10.172	10.2485	9.91719	9.97876	9.94559	10.012	10.7251	10.5003	10.7302	10.7087	10.6501	10.6065	10.3107	10.4527	10.5657	10.6546	10.4426	10.4969	10.6261	10.6429	10.7379	10.4609	10.6804	10.7781	10.6579	10.5113	10.5553	10.672	10.6988	10.6165	10.8655	10.774	10.8085	10.9233	11.1272	11.0209	10.1125	9.97879	10.6519	10.6551	10.443	10.5314	10.669	10.6398	10.5748	10.6624	10.816	11.0238
ENSMUSG00000006941	Eif1b	9.07289	8.89711	9.26112	8.9399	8.91892	8.83129	9.68443	9.63577	9.75664	9.70782	9.60057	9.68304	9.44396	9.46178	9.54768	9.3974	9.37932	9.33973	9.82507	9.81726	9.72424	9.72222	9.64988	9.75913	10.103	10.1409	9.89503	10.0131	10.1259	10.0962	9.36474	9.39096	9.39367	9.39543	9.19408	9.33665	9.07704	8.89671	9.69228	9.66381	9.48447	9.37215	9.78886	9.71041	10.0463	10.0784	9.38312	9.30872
ENSMUSG00000006958	Chrd	2.76472	2.82622	2.8418	2.89314	2.85157	2.90173	3.91576	3.99588	4.02144	3.90526	3.9575	3.98189	3.58297	3.68504	3.68168	3.65512	3.39015	3.40813	3.37138	3.41187	3.41186	3.40456	3.37992	3.37283	3.62945	3.72952	3.75185	3.68054	3.68257	3.68963	2.6692	2.77341	2.74574	2.70732	2.6913	2.73371	2.81091	2.88215	3.97769	3.94822	3.6499	3.48447	3.39837	3.38577	3.70361	3.68425	2.72945	2.71078
ENSMUSG00000006998	Psmd2	8.83113	8.58948	8.45064	8.54237	8.59612	8.64304	9.28793	9.30687	9.39364	9.33885	9.40327	9.33863	8.79925	8.6048	8.60234	8.73819	8.65761	8.6913	8.93379	8.82049	9.06177	8.93605	8.85164	8.99683	9.15398	8.85058	8.89189	8.99565	8.99823	8.92706	8.99674	8.9046	9.03295	8.93108	9.01867	9.10046	8.62375	8.59384	9.32948	9.36025	8.6688	8.6957	8.93868	8.92818	8.96548	8.97365	8.97809	9.01673
ENSMUSG00000007021	Syngr3	8.21852	8.12213	7.89451	8.18692	8.2693	8.13071	8.89838	8.99476	8.90774	8.85119	8.98056	8.90059	8.76977	9.08683	8.82887	9.09679	8.98135	8.89018	8.41531	8.45645	8.47884	8.39323	8.30465	8.36549	8.54891	8.5498	8.59454	8.31903	8.51275	8.32444	7.76868	7.8625	7.94463	7.8015	8.00212	8.04443	8.07839	8.19564	8.93363	8.91078	8.89516	8.98944	8.4502	8.35446	8.56442	8.38541	7.8586	7.94935
ENSMUSG00000007029	Vars	6.95326	6.82654	6.70501	6.71939	6.90656	6.92371	7.77137	7.75761	7.76083	7.71983	7.83334	7.6554	7.12387	6.95911	7.10099	7.19491	7.08581	7.26049	7.31956	7.27531	7.53603	7.41158	7.37183	7.45461	7.47998	7.20986	7.28901	7.44995	7.42292	7.28275	7.4027	7.40987	7.31108	7.30544	7.52939	7.45555	6.82827	6.84989	7.76327	7.73619	7.06132	7.1804	7.37697	7.41267	7.32628	7.3852	7.37455	7.43013
ENSMUSG00000007030	Vwa7	4.91028	5.06274	5.02927	5.19354	5.22177	5.06409	6.21428	6.53268	6.20547	6.3285	6.50894	6.33688	6.3851	6.98655	6.5114	6.28789	6.61899	6.35946	5.60702	5.49924	5.52518	5.43196	5.42763	5.38392	6.01336	6.16425	6.57368	5.91626	5.88777	5.95939	5.72074	5.72101	5.54326	5.83129	5.93621	5.72911	5.00076	5.1598	6.31748	6.39144	6.62768	6.42211	5.54381	5.4145	6.25043	5.92114	5.66167	5.8322
ENSMUSG00000007036	Abhd16a	8.62168	8.36828	8.55104	8.50332	8.50539	8.52518	9.56886	9.5499	9.43344	9.56758	9.49184	9.46265	9.13732	9.36858	9.19681	9.05471	9.26344	9.12373	8.93924	8.85651	8.99154	8.79249	8.68931	8.86427	8.87617	9.07015	9.08259	9.09797	9.00944	8.85053	8.36644	8.39007	8.50892	8.27332	8.3793	8.53295	8.51367	8.51129	9.5174	9.50735	9.23424	9.14729	8.9291	8.78202	9.00964	8.98598	8.42181	8.39519
ENSMUSG00000007038	Neu1	7.69304	7.18976	7.12013	7.27236	7.4078	7.4586	8.25103	8.35152	8.39195	8.18311	8.30236	8.29581	8.25787	8.77903	8.75975	8.56209	8.52627	8.44853	7.78435	7.88494	8.01778	8.01153	7.72171	7.66106	8.2697	8.25176	8.19872	8.01577	7.9913	8.02221	7.52148	7.55497	7.52217	7.37356	7.53491	7.6163	7.33431	7.37959	8.3315	8.26042	8.59888	8.5123	7.89569	7.7981	8.24006	8.00976	7.53287	7.50825
ENSMUSG00000007039	Ddah2	4.94176	4.77184	4.74058	4.71118	4.80807	4.88489	5.53396	5.41887	5.40682	5.45692	5.44996	5.43927	4.80656	4.69571	4.73719	4.74437	4.60103	5.08113	5.16324	5.07597	5.19733	5.1304	5.09075	5.16122	5.02566	5.02896	5.01399	5.21627	5.09765	5.04828	4.59737	4.54803	4.44559	4.56834	4.52723	4.58106	4.81806	4.80138	5.45322	5.44872	4.74649	4.80884	5.14551	5.12745	5.02287	5.12074	4.53033	4.55888
ENSMUSG00000007041	Clic1	5.93955	5.49498	5.84765	5.82636	5.80601	5.82801	6.40871	6.13697	6.42575	6.31842	6.33443	6.25308	5.56186	5.22074	5.26884	4.87108	5.457	5.33357	6.10021	6.02381	6.1509	5.98383	6.16424	6.17493	6.26741	6.11094	6.03094	6.23118	6.07592	6.09016	5.86421	5.66625	5.93154	5.67944	5.83221	5.9991	5.76073	5.82012	6.32381	6.30198	5.35048	5.22055	6.09164	6.10767	6.13643	6.13242	5.82067	5.83692
ENSMUSG00000007050	Lsm2	6.06119	6.00581	5.87486	6.0431	6.05957	5.93361	6.8281	6.74879	6.75427	6.81995	6.73313	6.81486	6.34126	6.11131	6.2025	6.26636	6.34086	6.12847	6.4173	6.44633	6.4437	6.35379	6.33115	6.41245	6.64697	6.68853	6.52688	6.67361	6.63145	6.81168	6.11233	6.12596	6.14225	6.07579	6.28038	5.94515	5.98062	6.01209	6.77705	6.78931	6.21836	6.24523	6.43577	6.3658	6.6208	6.70558	6.12684	6.10044
ENSMUSG00000007080	Pole	2.19343	2.08565	2.14902	2.18318	2.10035	2.1064	2.46561	2.48482	2.45439	2.4467	2.42895	2.45573	2.43984	2.39697	2.48337	2.41431	2.38131	2.53886	NA	NA	NA	NA	NA	NA	2.31687	2.25942	2.39536	2.3785	2.33067	2.3832	3.04032	2.89712	2.95	3.02402	3.10254	3.01669	2.1427	2.12998	2.46827	2.44379	2.44006	2.44483	NA	NA	2.32388	2.36412	2.96248	3.04775
ENSMUSG00000007097	Atp1a2	8.65156	8.39333	8.19793	8.3228	8.36362	8.41909	9.55211	9.57657	9.26815	9.46619	9.50658	9.26571	9.42293	9.55344	8.88875	9.30415	9.39173	8.9385	8.90557	8.63457	8.56045	8.59111	8.78237	8.75976	8.60165	8.4137	8.56729	8.60335	8.64604	8.1352	8.88061	8.45615	8.6294	8.57851	8.92853	8.75147	8.41427	8.3685	9.46561	9.41283	9.28838	9.21146	8.7002	8.71108	8.52755	8.46153	8.65539	8.75284
ENSMUSG00000007122	Casq1	NA	NA	NA	NA	NA	NA	2.40423	2.34656	2.35524	2.35844	2.53909	2.34981	2.65843	2.90547	2.83363	3.02328	2.80622	2.7276	NA	NA	NA	NA	NA	NA	NA	NA	NA	NA	NA	NA	NA	NA	NA	NA	NA	NA	NA	NA	2.36868	2.41578	2.79918	2.85236	NA	NA	NA	NA	NA	NA
ENSMUSG00000007207	Stx1a	4.7799	4.76884	4.50645	4.71146	4.79931	4.70285	5.25365	5.22705	5.3051	5.31856	5.33553	5.24207	4.55919	4.39175	4.15037	4.33321	4.43222	4.24183	5.00784	4.85588	5.1071	4.87395	5.00691	4.92611	4.5459	4.44629	4.26865	4.42369	4.47493	4.26827	4.41803	4.29972	4.41152	4.28776	4.51933	4.41363	4.68506	4.73787	5.26193	5.29872	4.3671	4.33575	4.99027	4.93566	4.42028	4.38896	4.37642	4.40691
ENSMUSG00000007216	Zfp775	3.32323	3.09776	3.23812	3.20153	3.209	3.26936	3.69985	3.6971	3.75879	3.6818	3.74314	3.76074	2.89691	2.88115	2.87186	2.87296	2.91886	2.76676	3.18089	3.10547	3.14606	3.1622	3.18349	3.1636	3.10863	2.9757	3.05907	3.0098	3.13557	3.12249	3.11341	3.02453	2.98668	3.02339	2.99419	2.9665	3.2197	3.22663	3.71858	3.72856	2.88331	2.85286	3.14414	3.16977	3.0478	3.08929	3.04154	2.99469
ENSMUSG00000007279	Scube2	2.19195	2.08323	2.14729	2.14273	2.0482	2.19297	3.1903	3.24858	3.20739	3.20605	3.285	3.25818	3.28642	3.6537	3.55106	3.48607	3.39719	3.53848	2.86668	2.82592	2.80735	2.85596	2.81193	2.83466	3.77093	3.92471	3.86753	3.79417	3.85384	4.06424	2.32024	2.42363	2.39953	2.33245	2.38209	2.33305	2.14083	2.12797	3.21542	3.24974	3.49706	3.47391	2.83332	2.83418	3.85439	3.90408	2.38114	2.3492
ENSMUSG00000007338	Mrpl49	7.28653	7.36538	7.50371	7.31662	7.27784	7.42154	8.00481	7.98664	7.96523	7.98132	7.84521	7.97723	7.40469	7.28671	7.42901	7.44479	7.36379	7.46408	7.88364	7.82818	7.72207	7.79572	7.79813	7.84474	7.95318	7.94006	7.92993	8.06345	7.90107	7.96097	7.2663	7.29561	7.28469	7.19661	7.15743	7.30899	7.38521	7.33866	7.98556	7.93459	7.37347	7.42422	7.8113	7.81286	7.94106	7.97516	7.2822	7.22101
ENSMUSG00000007411	Mark3	7.64672	7.75558	7.87423	7.83804	7.69888	7.67586	8.55254	8.51365	8.51958	8.60156	8.54435	8.56822	8.1255	8.10458	8.10134	8.06237	8.19937	7.98004	8.3889	8.3387	8.37893	8.41791	8.40362	8.41461	8.31664	8.47348	8.40868	8.42943	8.45056	8.39948	7.94387	7.81252	7.88404	7.93809	7.91713	7.85077	7.75885	7.73759	8.52859	8.57137	8.11048	8.08059	8.36885	8.41204	8.3996	8.42649	7.88014	7.902
ENSMUSG00000007415	Gatad1	7.30359	7.10573	7.31337	7.26521	7.15204	7.20972	8.03326	8.22712	8.18616	8.14938	8.14999	8.3139	7.87393	8.02866	7.8954	8.01466	8.01947	8.01927	7.92436	7.90368	7.88895	8.07916	7.82368	7.84167	8.31298	8.56083	8.39053	8.47038	8.43573	8.59132	7.16985	7.55149	7.38283	7.35739	7.07086	7.35878	7.24089	7.20899	8.14885	8.20442	7.93267	8.0178	7.90566	7.91484	8.42145	8.49914	7.36806	7.26234
ENSMUSG00000007440	Pcdha11	5.5066	5.20723	5.13473	5.21099	5.30948	5.14732	6.61343	6.90062	6.50328	6.71312	6.47011	6.76686	6.91238	7.42263	7.24385	7.09132	7.13216	7.27225	6.61104	6.45796	6.53137	6.47006	6.59258	6.47733	7.02824	7.01552	6.9747	7.04768	6.88557	6.89563	6.1229	6.18215	5.94401	6.21973	6.07436	6.04008	5.28285	5.2226	6.67245	6.65003	7.19295	7.16524	6.53346	6.51333	7.00616	6.94296	6.08302	6.11139
ENSMUSG00000007458	M6pr	8.33042	8.24425	8.50129	8.33146	8.39681	8.63445	9.42799	9.71794	9.56106	9.4807	9.46289	9.6763	9.35444	9.9558	9.7406	9.86673	9.70227	9.70898	9.14239	9.19029	8.98181	9.29518	9.05456	8.93103	9.53658	9.68904	9.86986	9.55449	9.62206	9.68586	8.51485	8.73395	8.73079	8.53603	8.47375	8.36096	8.35865	8.45424	9.569	9.53996	9.68361	9.75933	9.10483	9.09359	9.69849	9.62081	8.65986	8.45691
ENSMUSG00000007564	Ppp2r1a	10.836	10.8248	10.5277	10.6448	10.6651	10.757	11.2852	11.0198	11.3494	11.1997	11.1498	11.2143	10.7743	10.827	10.9608	10.9101	10.7799	10.8388	10.9738	10.9667	11.1409	10.9469	11.0571	11.1144	11.1918	10.9721	10.9506	11.0951	11.0698	11.0966	11.3069	11.2186	11.2573	11.334	11.5197	11.4147	10.7295	10.689	11.2181	11.1879	10.854	10.8429	11.0271	11.0395	11.0382	11.0872	11.2609	11.4228
ENSMUSG00000007570	Fance	2.6308	2.4918	2.38462	2.48595	2.47221	2.42296	3.25063	3.20621	3.19693	3.18942	3.16441	3.16665	2.757	2.67812	2.76048	2.89725	2.77025	2.84574	3.0277	3.01383	3.1162	3.00063	3.01379	3.03716	2.72338	2.87661	2.85648	2.82404	2.77662	2.90548	2.94232	2.88676	2.87742	2.83562	2.96961	2.88738	2.50241	2.46038	3.21793	3.17349	2.73187	2.83775	3.05258	3.01719	2.81883	2.83538	2.90217	2.89754
ENSMUSG00000007589	Tinf2	5.64602	5.52496	5.41142	5.46485	5.5588	5.58781	6.1032	6.05934	6.06959	6.10246	6.24797	6.11441	5.77514	5.37556	5.48409	5.58117	5.75692	5.59844	5.73035	5.74327	5.79939	5.7691	5.73205	5.8419	5.62105	5.73739	5.73437	5.9357	5.955	5.86923	5.44454	5.44953	5.40187	5.34499	5.44172	5.28377	5.52747	5.53715	6.07738	6.15495	5.54493	5.64551	5.75767	5.78102	5.6976	5.91998	5.43198	5.35683
ENSMUSG00000007594	Hapln4	9.89669	9.76193	9.29473	9.66679	9.81501	9.88678	10.855	11.0192	10.7942	10.8333	10.896	10.8364	10.9757	11.7728	11.6959	11.5401	11.3832	11.4409	10.7227	10.8592	10.7358	10.6326	10.6508	10.5206	11.214	11.349	11.4655	11.0341	10.9655	11.2042	10.4225	10.561	10.1137	10.1372	10.1848	10.1241	9.65112	9.78953	10.8895	10.8552	11.4815	11.4547	10.7725	10.6013	11.3428	11.0679	10.3657	10.1487
ENSMUSG00000007603	Dus3l	6.53277	6.28574	5.79713	6.06521	6.06398	6.09822	6.78065	6.78202	6.78914	6.74322	6.86139	6.6883	6.24899	6.08718	6.08608	6.1514	6.15625	6.10814	6.34641	6.48046	6.35991	6.3144	6.39195	6.39954	6.38184	6.32948	6.23175	6.503	6.52	6.29301	6.28016	6.31852	6.3056	6.31828	6.44394	6.46684	6.20521	6.0758	6.78394	6.7643	6.14075	6.1386	6.39559	6.36863	6.31436	6.43867	6.30143	6.40969
ENSMUSG00000007610	Gtpbp3	4.15581	4.04693	4.01793	4.18786	4.09242	4.18693	4.92764	4.9216	4.93636	4.89614	4.90688	4.89482	4.60973	4.80037	4.59246	4.94227	4.64641	4.54826	4.6186	4.61984	4.59305	4.60706	4.59805	4.5106	4.75444	4.73403	4.665	4.72045	4.70084	4.78715	4.65762	4.7603	4.64717	4.59623	4.61853	4.66169	4.07356	4.15574	4.92853	4.89928	4.66752	4.71231	4.6105	4.5719	4.71783	4.73615	4.68836	4.62548
ENSMUSG00000007613	Tgfbr1	5.24232	5.10945	5.09516	5.0142	5.05259	5.03964	6.39123	6.56063	6.30179	6.42597	6.51776	6.47863	6.4118	6.82525	6.45405	6.86613	6.50896	6.53691	6.08699	5.95595	5.92915	5.98675	6.04346	6.00733	6.23436	6.50684	6.56377	6.46484	6.42966	6.4117	5.37113	5.54034	5.567	5.52213	5.41222	5.69802	5.14898	5.03548	6.41789	6.47412	6.5637	6.63734	5.99069	6.01251	6.43499	6.4354	5.49282	5.54413
ENSMUSG00000007617	Homer1	7.29436	7.29906	7.42592	7.29389	7.32845	7.17703	8.22841	8.27525	8.17773	8.20976	8.24021	8.16999	8.0194	8.23104	8.19383	8.05863	8.26181	8.34718	8.06287	8.19226	8.09151	8.07021	8.22123	8.13339	8.46563	8.50756	8.46379	8.34604	8.37837	8.37968	7.68749	7.76672	7.81948	7.70025	7.74192	7.67545	7.33978	7.26645	8.22713	8.20666	8.14809	8.22254	8.11555	8.14161	8.47899	8.36803	7.7579	7.70587
ENSMUSG00000007646	Rad51c	4.5031	4.42044	4.48266	4.44993	4.56781	4.47303	5.20982	5.19177	5.25711	5.24038	5.2948	5.26738	4.91336	4.98897	4.99709	4.92287	4.98513	4.99456	5.32498	5.32654	5.48483	5.3597	5.39504	5.37294	5.3704	5.38329	5.22294	5.14573	5.36749	5.33549	4.86698	4.80749	4.85279	4.8782	5.07232	4.87919	4.46873	4.49692	5.21957	5.26752	4.96647	4.96752	5.37878	5.3759	5.32555	5.2829	4.84242	4.94324
ENSMUSG00000007653	Gabrb2	11.8667	11.7795	11.9927	11.7232	11.7172	11.8737	12.7083	12.9219	12.7227	12.7516	12.7548	12.742	12.6067	13.245	13.2037	13.0038	12.9813	13.0996	12.6393	12.7279	12.5282	12.6793	12.6179	12.5702	13.1484	13.2506	13.3515	12.9909	13.1002	13.0652	11.9427	12.1856	11.9878	12.007	11.6901	11.76	11.8796	11.7713	12.7843	12.7495	13.0185	13.0283	12.6318	12.6225	13.2502	13.0521	12.0387	11.819
ENSMUSG00000007655	Cav1	NA	NA	NA	NA	NA	NA	NA	NA	NA	NA	NA	NA	NA	NA	NA	NA	NA	NA	NA	NA	NA	NA	NA	NA	1.89008	1.80451	1.82037	1.85494	1.78402	1.77315	NA	NA	NA	NA	NA	NA	NA	NA	NA	NA	NA	NA	NA	NA	1.83832	1.80404	NA	NA
ENSMUSG00000007656	Arpp19	7.55339	7.87488	7.87562	7.75499	7.60143	7.69213	8.48882	8.49581	8.46327	8.52346	8.48746	8.61043	8.30613	8.18155	8.2467	8.26119	8.16439	8.26082	8.59365	8.52843	8.31988	8.43153	8.61609	8.4839	8.80365	8.98091	8.79904	8.86871	8.84514	8.94891	8.11182	8.05124	8.02667	7.91721	7.89093	7.79381	7.76796	7.68285	8.48263	8.54045	8.24479	8.2288	8.48066	8.51051	8.8612	8.88759	8.06324	7.86732
ENSMUSG00000007659	Bcl2l1	7.995	7.65141	7.78694	7.6966	7.80862	7.82364	8.15924	8.0823	8.30166	8.11003	8.16153	8.35515	7.8672	8.0484	8.09002	8.23877	7.97326	8.03141	7.86409	7.86748	7.84286	7.83893	7.85624	7.81093	7.84888	7.95093	7.94339	7.937	7.74198	8.00536	7.58695	7.68049	7.64246	7.51017	7.67578	7.83147	7.81112	7.77629	8.18107	8.2089	8.00187	8.08115	7.85814	7.83537	7.9144	7.89478	7.63664	7.67247
ENSMUSG00000007670	Khsrp	7.98208	7.87003	7.91524	7.74058	7.78131	7.76253	8.48558	8.30621	8.42779	8.51737	8.41223	8.39543	7.98591	7.94884	7.93342	8.0553	7.93164	7.83561	8.26557	8.22412	8.42548	8.30451	8.22637	8.34292	8.24969	8.27458	8.29318	8.26967	8.22241	8.26322	8.39064	8.43582	8.29873	8.19256	8.32222	8.3658	7.92245	7.76147	8.40653	8.44168	7.95606	7.94085	8.30506	8.29127	8.27248	8.25177	8.37506	8.29353
ENSMUSG00000007682	Dio2	2.66856	2.6323	2.56292	2.66014	2.68278	2.60198	3.56357	3.60638	3.52983	3.60293	3.56443	3.51508	3.04677	3.38035	3.27805	3.15074	3.10596	3.06513	2.79465	2.75628	2.75876	2.74804	2.77826	2.7719	3.25092	3.15785	3.16082	3.22145	3.23822	3.17299	2.70325	2.72517	2.74078	2.68761	2.7364	2.77124	2.62126	2.6483	3.56659	3.56081	3.23506	3.10727	2.7699	2.76607	3.18986	3.21089	2.72307	2.73175
ENSMUSG00000007721	Ccdc124	7.24734	7.01612	7.22328	7.01334	6.94588	6.99772	7.65804	7.62707	7.78059	7.63808	7.59009	7.72393	7.3673	7.34535	7.35316	7.3467	7.28736	7.52405	7.63237	7.71332	7.90487	7.75544	7.60772	7.73727	8.17292	7.86843	7.77345	7.74603	7.8807	7.82367	7.28707	7.39699	7.28384	7.08144	7.23105	7.21903	7.16225	6.98565	7.68857	7.6507	7.35527	7.38604	7.75018	7.70014	7.93827	7.8168	7.32263	7.17717
ENSMUSG00000007739	Cct4	9.71449	9.76282	9.77327	9.72927	9.52419	9.55508	10.3891	10.088	10.2916	10.3609	10.221	10.2475	9.86682	9.62498	9.69642	9.69998	9.75788	9.63919	10.2905	10.3014	10.3178	10.2763	10.2637	10.2885	10.5239	10.2031	10.1041	10.4009	10.4259	10.2601	10.1116	10.0435	10.0924	10.1584	10.0615	10.0783	9.7502	9.60284	10.2562	10.2765	9.72941	9.69902	10.3033	10.2762	10.277	10.3623	10.0825	10.0994
ENSMUSG00000007777	0610009B22Rik	6.78311	6.87687	6.96669	6.7909	6.76861	6.84659	7.46273	7.4923	7.50168	7.49801	7.45512	7.53393	7.30695	7.37987	7.42163	7.41527	7.42122	7.27774	7.53695	7.46241	7.54158	7.54592	7.53128	7.47887	7.85487	7.77796	7.70691	7.83845	7.76871	7.92442	7.12698	7.28585	7.24453	7.40454	7.22227	7.11337	6.87556	6.80203	7.48557	7.49569	7.36948	7.37141	7.51365	7.51869	7.77991	7.84386	7.21912	7.24673
ENSMUSG00000007783	Cpt1c	7.47706	7.63009	7.50447	7.70149	7.70465	7.73017	8.43811	8.51378	8.48542	8.38876	8.59756	8.48387	8.21342	8.50237	8.3332	8.59282	8.47208	8.48523	7.93911	7.96976	7.99827	7.91288	7.95517	7.97982	8.06735	7.95939	8.21452	8.00267	7.99201	7.9722	7.64916	7.52853	7.62409	7.6122	7.73788	7.62453	7.53721	7.7121	8.4791	8.49006	8.34966	8.51671	7.96905	7.94929	8.08042	7.98896	7.60059	7.6582
ENSMUSG00000007812	Zfp655	7.89065	7.87378	7.9478	7.95959	7.86883	7.88283	8.83023	8.88088	8.85787	8.88278	8.89892	8.82881	8.44141	8.18635	8.24684	8.13634	8.33682	8.18867	8.61186	8.73627	8.57743	8.82986	8.75788	8.70273	8.88266	9.0508	8.94188	9.00468	9.13433	9.01527	8.62009	8.6089	8.6931	8.75175	8.57295	8.61308	7.90408	7.90375	8.85633	8.87017	8.29153	8.22061	8.64185	8.76349	8.95845	9.05143	8.6407	8.64593
ENSMUSG00000007815	Rhoa	8.06181	7.23922	7.20214	7.35343	7.39986	7.32517	7.85206	7.6176	7.77853	7.76403	7.71636	7.76107	7.15997	7.30887	7.18225	7.20452	7.17203	7.20419	7.46641	7.44597	7.69512	7.55896	7.5889	7.52086	7.66903	7.41186	7.44199	7.45363	7.37685	7.46588	7.44586	7.44249	7.24025	7.43987	7.50204	7.51977	7.50106	7.35949	7.7494	7.74715	7.21703	7.19358	7.53583	7.55624	7.50763	7.43212	7.3762	7.48723
ENSMUSG00000007817	Zmiz1	8.17823	7.78031	7.96039	7.8964	7.95447	7.98437	8.47303	8.29479	8.31432	8.53659	8.41586	8.31899	8.14316	8.2689	8.38336	7.95845	8.23756	8.10803	8.07661	8.07693	8.26111	7.97947	8.0853	8.06813	8.15354	8.22398	8.20277	8.18289	8.00457	8.17421	8.44981	8.32072	8.35511	8.14521	8.46372	8.35623	7.97297	7.94508	8.36072	8.42381	8.26514	8.10135	8.13822	8.0443	8.19343	8.12056	8.37522	8.32172
ENSMUSG00000007827	Ankrd26	6.59187	6.6631	6.83074	6.62907	6.59015	6.51214	7.46217	7.31783	7.30714	7.39383	7.26384	7.33734	6.87045	6.46705	6.48919	6.75898	6.67092	6.69599	7.08393	6.96594	7.12388	7.20274	7.06958	7.06668	7.33649	7.2377	7.20265	7.3568	7.29056	7.18721	7.30676	7.29402	7.36499	7.34453	7.43666	7.23316	6.69524	6.57712	7.36238	7.33167	6.60889	6.70863	7.05792	7.113	7.25895	7.27819	7.32193	7.33812
ENSMUSG00000007833	Aldh16a1	4.64623	4.39499	4.15634	4.2281	4.21108	4.459	4.56545	4.56832	4.63724	4.51167	4.59699	4.574	4.04402	4.19705	4.01318	4.15188	4.18794	4.28772	4.42562	4.3831	4.48249	4.45248	4.41598	4.38502	4.29873	4.19009	4.21062	4.27132	4.058	4.25381	4.12352	4.06845	4.09453	4.16227	4.18576	4.18085	4.39919	4.29939	4.59034	4.56089	4.08475	4.20918	4.4304	4.41783	4.23315	4.19438	4.0955	4.1763
ENSMUSG00000007836	Hnrnpa0	7.83907	7.79928	7.25756	7.52153	7.49568	7.55362	8.67477	8.31635	8.33109	8.55968	8.53563	8.28535	8.15411	7.98433	8.10079	7.95833	7.94335	8.05879	8.28533	8.32355	8.41887	8.36108	8.26589	8.4012	8.06204	8.22582	8.16872	8.30601	8.25386	8.06588	8.28794	8.2385	8.13557	8.01674	8.17922	8.21538	7.63197	7.52361	8.44074	8.46022	8.07974	7.98682	8.34259	8.34272	8.1522	8.20858	8.22067	8.13711
ENSMUSG00000007837	Prrg2	2.87093	2.85161	2.78149	2.84255	2.77827	2.74267	3.59105	3.61284	3.62522	3.61575	3.58406	3.59428	3.38845	3.43883	3.49715	3.32985	3.64404	3.46242	2.95214	2.94269	2.93283	2.91743	2.90581	2.95269	2.80632	2.67256	2.74093	2.72359	2.67477	2.68334	2.29187	2.34069	2.29443	2.27653	2.28731	2.26326	2.83468	2.78783	3.6097	3.59803	3.44148	3.47877	2.94256	2.92531	2.73994	2.6939	2.30899	2.2757
ENSMUSG00000007850	Hnrnph1	9.36153	9.66363	9.68935	9.53214	9.41891	9.60087	10.2227	9.9799	10.121	10.1966	10.0393	10.059	9.86631	10.1577	10.1741	10.0274	10.1322	10.0959	10.063	9.89709	10.252	10.1064	10.1283	10.1018	10.2161	10.0968	10.0409	10.1452	10.0364	10.1258	9.98883	10.0578	10.0073	9.9579	9.85978	9.93252	9.5715	9.51731	10.1079	10.0983	10.066	10.0852	10.0707	10.1122	10.1179	10.1025	10.018	9.91673
ENSMUSG00000007867	Ift43	5.92486	5.86755	6.02475	5.74363	5.75859	5.65374	6.04324	6.17705	6.16362	6.12856	6.24744	6.16073	5.6325	5.48353	5.41072	5.4794	5.39727	5.35181	6.05047	6.01443	6.18128	6.09978	6.02437	6.10639	6.07372	5.94566	6.02362	6.1485	6.01705	6.10309	5.62811	5.63029	5.48648	5.51587	5.50091	5.58178	5.93905	5.71865	6.12797	6.17891	5.50892	5.4095	6.08206	6.07684	6.01433	6.08955	5.58163	5.53285
ENSMUSG00000007872	Id3	NA	NA	NA	NA	NA	NA	2.34181	2.28072	2.33203	2.29352	2.31338	2.33478	NA	NA	NA	NA	NA	NA	2.38567	2.40079	2.43452	2.39682	2.40993	2.3857	NA	NA	NA	NA	NA	NA	2.81988	2.79656	2.82314	2.84518	3.0476	2.96306	NA	NA	2.31819	2.31389	NA	NA	2.40699	2.39749	NA	NA	2.81319	2.95195
ENSMUSG00000007877	Tcap	3.17456	3.08389	3.15906	3.06614	3.12444	3.20725	3.94811	3.9297	3.97462	3.9419	3.95233	3.94132	3.29375	3.41592	3.20749	3.47019	3.28602	3.25935	3.85357	3.92723	3.92093	3.91551	3.81816	3.83183	3.88089	3.8023	3.95181	3.94954	3.85778	3.8609	3.96148	3.95305	4.07364	4.01444	3.94994	4.06475	3.13917	3.13261	3.95081	3.94518	3.30572	3.33852	3.90058	3.85517	3.87834	3.8894	3.99606	4.00971
ENSMUSG00000007880	Arid1a	7.59295	7.95779	7.80956	7.9051	7.87923	7.67227	8.63605	8.42451	8.49543	8.63027	8.52728	8.45578	8.30325	8.41548	8.33766	8.29691	8.3955	8.30406	8.57973	8.47287	8.56288	8.4004	8.55253	8.50436	8.62794	8.81183	8.67658	8.64793	8.63322	8.64905	8.71205	8.53053	8.48523	8.48425	8.69799	8.69358	7.78677	7.81886	8.51867	8.53778	8.35213	8.33216	8.53849	8.48576	8.70545	8.6434	8.57594	8.62527
ENSMUSG00000007888	Crlf1	NA	NA	NA	NA	NA	NA	2.45314	2.47688	2.45957	2.5088	2.47428	2.47349	2.24237	2.20337	2.14572	2.15312	2.27074	2.19113	2.3999	2.38248	2.44989	2.39932	2.40193	2.47148	2.57443	2.44043	2.47955	2.46171	2.42812	2.42558	NA	NA	NA	NA	NA	NA	NA	NA	2.46319	2.48553	2.19716	2.20499	2.41076	2.42424	2.49814	2.43847	NA	NA
ENSMUSG00000007891	Ctsd	8.90757	8.95092	9.15441	8.88507	8.96923	9.00448	10.0263	10.0352	9.81028	10.0595	9.86303	9.77788	9.9874	10.9079	10.6644	10.4821	10.4269	10.3252	9.896	9.87306	9.75444	9.82829	9.8447	9.66668	10.4149	10.663	10.6688	10.2759	10.1745	10.4691	9.53428	9.69173	9.60557	9.44886	9.47119	9.5382	9.0043	8.95293	9.95725	9.90012	10.5199	10.4114	9.84117	9.77989	10.5822	10.3065	9.61053	9.48608
ENSMUSG00000007892	Rplp1	5.95205	5.81749	5.73274	5.76868	5.62237	5.78128	6.34477	6.35588	6.40062	6.14163	6.28252	6.29979	6.29198	6.67809	6.84035	6.42771	6.50752	6.59585	6.2272	6.33447	6.32754	6.19088	6.23017	6.27911	6.59319	6.62912	6.43763	6.38262	6.34893	6.61675	6.70178	6.48715	6.45126	6.29228	6.49089	6.4613	5.83409	5.72411	6.36709	6.24131	6.60347	6.51036	6.2964	6.23338	6.55331	6.44944	6.54673	6.41482
ENSMUSG00000007908	Hmgcll1	5.61631	5.8118	5.88001	5.82022	5.77365	6.00954	6.55932	6.63946	6.69767	6.69963	6.61766	6.56147	6.29321	6.1103	6.05697	6.09224	6.1579	6.14452	6.31927	6.30834	6.29508	6.36059	6.36419	6.26303	6.81673	6.75207	6.68558	6.80307	6.70256	6.79353	6.03669	6.01913	5.98402	5.99301	6.02334	5.86784	5.76937	5.8678	6.63215	6.62625	6.15349	6.13155	6.30756	6.32927	6.75146	6.76639	6.01328	5.9614
ENSMUSG00000007944	Ttc9b	5.8431	5.55214	5.76232	5.56214	5.6899	5.69015	6.21757	6.10474	6.05262	6.12524	6.0618	6.12187	5.70208	5.7943	5.64464	5.46215	5.64881	5.72584	5.82379	5.89592	5.96311	5.86585	5.92538	5.79392	6.10618	6.14613	6.02282	5.90527	5.83606	6.08156	5.64213	5.75277	5.70785	5.49791	5.69235	5.65516	5.71919	5.6474	6.12497	6.10297	5.71367	5.61227	5.89427	5.86171	6.09171	5.94096	5.70092	5.61514
ENSMUSG00000007950	Abhd8	8.24289	7.7793	7.52276	7.88644	7.98461	7.97895	8.55632	8.6982	8.82642	8.43345	8.68833	8.81189	8.3477	8.35711	8.38693	8.56236	8.4021	8.60921	8.12858	8.27727	8.37594	8.16783	8.12091	8.27057	8.45434	8.24083	8.38899	8.34634	8.31451	8.27512	8.01543	7.96528	7.85075	7.82477	8.03811	7.85413	7.84832	7.95	8.69365	8.64456	8.36391	8.52456	8.26059	8.18644	8.36139	8.31199	7.94382	7.90567
ENSMUSG00000007987	Ift22	6.56178	6.52171	6.68025	6.64982	6.60398	6.67938	7.29758	7.28011	7.27491	7.27532	7.31981	7.27504	7.09321	6.98204	6.9141	6.81074	7.07793	7.07249	7.14879	7.06472	7.11022	7.16892	7.11016	6.97398	7.41024	7.25659	7.30553	7.29203	7.31406	7.30233	6.86539	6.86386	6.82157	6.91121	6.78069	6.71818	6.58791	6.64439	7.2842	7.29006	6.99645	6.98705	7.10791	7.08435	7.32412	7.3028	6.85028	6.80336
ENSMUSG00000007989	Fzd3	5.8217	6.27076	6.14672	6.30511	6.36413	6.13181	7.38275	7.58714	7.29388	7.49422	7.45249	7.44371	7.74385	8.49513	8.47174	8.21129	8.25276	8.32333	7.45283	7.3755	7.18076	7.32	7.52299	7.2412	7.86789	8.1969	8.35334	7.93924	7.75359	8.06008	6.76955	7.13063	7.04115	6.88737	6.70572	6.81374	6.07973	6.26702	7.42125	7.46347	8.23691	8.26246	7.33636	7.3614	8.13937	7.91764	6.98044	6.80228
ENSMUSG00000008028	1700008O03Rik	NA	NA	NA	NA	NA	NA	2.71193	2.66845	2.72961	2.70056	2.70167	2.70968	2.02673	1.93243	1.94294	1.78506	1.85971	1.88156	2.30513	2.32346	2.34977	2.38558	2.28721	2.32769	2.40952	2.3691	2.3578	2.33986	2.39185	2.48297	1.96294	2.01077	1.99526	2.00247	1.9737	2.0065	NA	NA	2.70333	2.70397	1.96736	1.84211	2.32612	2.33349	2.37881	2.40489	1.98965	1.99422
ENSMUSG00000008035	Mid1ip1	6.36531	6.414	6.19716	6.16154	6.29468	6.23852	6.93278	6.86743	6.93464	6.96557	6.86762	6.89469	6.50487	6.39295	6.60417	6.57035	6.42255	6.51916	6.81905	6.72835	6.94789	6.87872	6.77132	6.94376	6.6934	6.48145	6.55234	6.66483	6.48893	6.51719	6.66205	6.46074	6.63052	6.56365	6.58749	6.60999	6.32549	6.23158	6.91162	6.90929	6.50066	6.50402	6.83176	6.8646	6.57573	6.55698	6.58444	6.58705
ENSMUSG00000008036	Ap2s1	9.32816	9.58402	9.44136	9.59452	9.58739	9.485	10.4089	10.328	10.3521	10.3464	10.2804	10.3212	10.0187	9.7853	9.82903	9.78189	9.85005	9.82063	10.1337	10.1242	10.1187	10.0944	10.0585	10.2226	10.1307	10.2887	10.2115	10.3142	10.3574	10.3175	9.63461	9.56641	9.70304	9.79416	9.83328	9.74917	9.45118	9.55564	10.363	10.316	9.8777	9.81752	10.1256	10.1252	10.2103	10.3297	9.63469	9.7922
ENSMUSG00000008090	Fgfrl1	1.95559	2.04265	2.02092	1.96991	2.01145	2.01654	2.71943	2.71103	2.74886	2.68126	2.73598	2.67374	2.68383	2.58044	2.54438	2.53148	2.50683	2.44549	NA	NA	NA	NA	NA	NA	2.92856	2.90158	2.90456	2.95009	2.82204	2.87506	2.1768	2.16719	2.18214	2.21538	2.23804	2.22303	2.00638	1.9993	2.72644	2.69699	2.60289	2.4946	NA	NA	2.91156	2.8824	2.17538	2.22548
ENSMUSG00000008129	4930432K21Rik	2.42881	2.33097	2.44407	2.36627	2.41716	2.53209	3.76663	3.70782	3.67172	3.73504	3.69576	3.72775	3.00693	2.94094	3.09345	3.07715	3.06684	3.04036	3.65185	3.62258	3.70121	3.65957	3.62597	3.67241	3.32479	3.449	3.3128	3.34221	3.40336	3.29432	3.44719	3.40861	3.4377	3.47872	3.40119	3.44494	2.40128	2.43851	3.71539	3.71952	3.01377	3.06145	3.65855	3.65265	3.3622	3.34663	3.43117	3.44162
ENSMUSG00000008136	Fhl2	3.59007	3.57265	3.58802	3.60942	3.6011	3.56617	4.03698	4.04811	4.07569	4.10016	3.99152	4.03285	3.9817	3.89027	3.92329	3.92538	3.80173	3.82173	4.12564	4.07128	4.11776	4.22142	4.11908	4.25345	4.11552	4.00896	4.02497	3.93922	4.07811	3.94725	3.96607	3.76611	4.06445	3.87899	3.96276	3.84528	3.58358	3.59223	4.0536	4.04151	3.93176	3.84961	4.10489	4.19799	4.04982	3.98819	3.93221	3.89568
ENSMUSG00000008140	Emc10	8.19098	8.24915	8.04315	8.23895	8.42039	8.40489	9.33575	9.44731	9.21566	9.2275	9.41647	9.33309	9.23845	9.65268	9.67463	9.62628	9.5043	9.5596	8.78031	8.86253	8.86365	8.76093	8.70099	8.78801	9.03569	9.12091	9.19872	9.00603	8.82868	8.96641	8.30284	8.37532	8.29202	8.17462	8.40413	8.36201	8.16109	8.35474	9.33291	9.32569	9.52192	9.56339	8.8355	8.74998	9.11844	8.93371	8.32339	8.31359
ENSMUSG00000008153	Clstn3	13.1268	13.0872	13.0046	12.9705	13.0935	13.1621	14.1215	14.2811	13.9974	14.1076	14.119	14.1437	14.0601	14.8655	14.6172	14.6646	14.5349	14.4838	13.7717	13.886	13.7912	13.7673	13.6924	13.6069	14.0367	14.412	14.5949	14.1481	14.1888	14.277	13.1574	13.5227	13.1713	13.154	13.1347	13.1601	13.0729	13.0754	14.1333	14.1234	14.5143	14.5611	13.8163	13.6889	14.3479	14.2047	13.2838	13.1496
ENSMUSG00000008167	Fbxw9	2.35074	2.29888	2.25682	2.3184	2.41277	2.39385	3.44186	3.52273	3.51003	3.49154	3.51905	3.54266	3.29224	3.20561	3.54642	3.33619	3.18996	3.23954	1.98147	2.00573	1.99674	1.96786	1.99302	1.95639	2.86863	2.84438	2.80316	2.81879	2.89959	2.90714	2.41426	2.37903	2.37835	2.38542	2.49555	2.38896	2.30215	2.37501	3.49154	3.51775	3.34809	3.25523	1.99465	1.97242	2.83872	2.87517	2.39055	2.42331
ENSMUSG00000008200	Fnbp4	6.2015	6.33182	6.43117	6.33163	6.24859	6.22713	7.06814	6.97699	7.00843	7.20082	7.01126	7.13206	6.8585	6.64489	6.61964	6.6174	6.59535	6.55474	6.94393	6.9045	6.87956	6.85644	7.02194	6.92922	7.03174	7.06925	7.23736	7.15332	7.13956	7.12201	6.87661	6.94711	6.76833	6.67701	6.79742	6.73942	6.3215	6.26912	7.01785	7.11471	6.70768	6.58916	6.90933	6.93587	7.11278	7.1383	6.86402	6.73795
ENSMUSG00000008206	Cers4	6.62507	6.64187	6.67841	6.57065	6.78228	6.84104	7.55723	7.76085	7.61319	7.62021	7.73868	7.8664	7.33452	7.93382	7.68629	7.84351	7.79581	7.81618	7.13894	7.03949	7.10506	7.16597	7.03903	7.10458	7.23516	7.31309	7.67606	7.30569	7.44726	7.2803	6.82257	6.92364	6.71062	6.69375	6.65998	6.86279	6.64845	6.73132	7.64376	7.74177	7.65154	7.8185	7.0945	7.10319	7.4081	7.34442	6.81894	6.73884
ENSMUSG00000008226	Scrn3	7.3954	7.36436	7.3161	7.41596	7.2867	7.18781	8.12875	8.1937	8.28658	8.20605	8.2146	8.25011	7.93278	7.8459	7.98579	7.99134	7.98647	7.92221	7.98956	7.98939	8.04647	7.97251	8.12255	8.15822	8.38844	8.27046	8.26631	8.29212	8.30816	8.30595	8.05299	7.99546	8.10731	8.15382	8.09937	8.10651	7.35862	7.29682	8.20301	8.22358	7.92149	7.96667	8.00847	8.08443	8.3084	8.30208	8.05192	8.1199
ENSMUSG00000008301	Phax	7.56349	7.5296	7.76622	7.59722	7.50668	7.53884	8.25166	8.18593	8.35082	8.32145	8.26517	8.38405	7.96159	7.7526	7.95678	7.65978	7.85171	7.79966	8.09418	8.13902	8.09348	8.189	8.18774	8.13953	8.42115	8.2325	8.07085	8.26104	8.23346	8.38032	7.85771	7.53973	7.70075	7.65892	7.62008	7.53799	7.61977	7.54758	8.2628	8.32356	7.89032	7.77038	8.10889	8.17209	8.2415	8.29161	7.6994	7.60566
ENSMUSG00000008305	Tle1	5.52804	5.42962	5.26452	5.3508	5.44287	5.40832	6.29351	6.21724	6.28031	6.28909	6.24138	6.10284	5.83381	5.84605	5.72906	5.71685	5.83481	5.7791	6.06646	5.99765	6.14854	5.98225	5.99417	6.02504	6.17242	6.15086	6.03777	6.0685	6.00188	5.87817	5.83252	5.85963	5.90722	6.00589	5.98681	5.93902	5.4074	5.40067	6.26369	6.2111	5.80297	5.77692	6.07089	6.00049	6.12035	5.98285	5.86646	5.97724
ENSMUSG00000008318	Relt	7.45008	7.49412	7.42854	7.26463	7.43302	7.52174	8.34343	8.4403	8.36531	8.30458	8.38234	8.39534	8.27355	8.76053	8.45093	8.58997	8.39596	8.36669	7.96965	8.01746	7.88495	7.96616	7.75965	7.8744	8.22667	8.30466	8.42942	8.24085	8.38243	8.28643	7.57182	7.57527	7.57136	7.53834	7.56514	7.49789	7.45758	7.40646	8.38302	8.36075	8.495	8.45088	7.95735	7.86674	8.32025	8.30324	7.57282	7.53379
ENSMUSG00000008333	Snrpb2	6.67158	6.89943	6.75159	6.85733	6.92069	6.83898	7.67952	7.5327	7.66191	7.68686	7.50545	7.7624	7.30346	7.10914	7.18238	7.10048	7.18834	7.06196	7.56192	7.41949	7.38049	7.59358	7.4573	7.54275	7.48873	7.5676	7.58896	7.79194	7.71761	7.74301	7.18235	7.00751	7.16314	7.11264	6.99343	7.04348	6.7742	6.87233	7.62471	7.65157	7.19832	7.11693	7.45397	7.53121	7.54843	7.75085	7.11767	7.04985
ENSMUSG00000008348	Ubc	9.52661	9.52185	9.61349	9.29913	9.23844	9.06695	9.96776	9.69098	9.80782	9.97953	9.703	9.76995	9.56465	9.59803	9.58205	9.48856	9.37853	9.37705	9.97458	10.0578	9.88391	9.88617	10.1016	10.1626	10.341	10.3551	10.3356	10.4244	10.5192	10.4259	10.5145	10.38	10.4838	10.5541	10.7044	10.5377	9.55398	9.20151	9.82219	9.81749	9.58158	9.41471	9.97211	10.0501	10.3439	10.4565	10.4594	10.5987
ENSMUSG00000008373	Prpf31	6.70367	6.83477	6.55006	6.74562	6.68049	6.72502	7.62824	7.57023	7.61182	7.58748	7.55183	7.69121	7.10525	6.82323	6.89374	7.03876	7.00381	6.978	7.28431	7.31385	7.27471	7.26951	7.30848	7.3584	7.22045	7.31355	7.22879	7.34857	7.28493	7.32564	6.92503	6.98371	6.93484	6.89004	7.1572	7.0527	6.69617	6.71705	7.60343	7.61018	6.94074	7.00686	7.29096	7.31213	7.25426	7.31971	6.94786	7.03331
ENSMUSG00000008384	Sertad1	3.69965	3.29257	3.3802	3.29224	3.26951	3.3578	4.38955	4.405	4.37955	4.38463	4.46129	4.37906	3.5869	3.47748	3.54897	3.41065	3.39743	3.48265	4.07222	4.03472	4.0759	4.0602	4.04025	4.08333	4.22114	4.20296	4.1232	4.22583	4.12352	4.23334	4.08253	4.09106	4.07416	4.01848	4.12286	4.05928	3.45747	3.30651	4.39136	4.40833	3.53779	3.43024	4.06095	4.06126	4.18243	4.19423	4.08258	4.06687
ENSMUSG00000008393	Carhsp1	NA	NA	NA	NA	NA	NA	NA	NA	NA	NA	NA	NA	NA	NA	NA	NA	NA	NA	NA	NA	NA	NA	NA	NA	NA	NA	NA	NA	NA	NA	1.71809	1.72008	1.79199	1.77297	1.79721	1.80548	NA	NA	NA	NA	NA	NA	NA	NA	NA	NA	1.74339	1.79189
ENSMUSG00000008429	Herpud2	8.09032	8.07257	8.06488	7.96361	8.06966	7.96159	8.68903	8.65502	8.76863	8.71969	8.70725	8.77391	8.11185	8.26008	8.19732	8.44421	8.27376	8.27907	8.48456	8.38462	8.52339	8.51029	8.41924	8.40759	8.55355	8.555	8.58263	8.51577	8.6323	8.67691	8.03215	8.05333	8.19473	8.01703	7.96078	7.97849	8.07593	7.99829	8.70423	8.73362	8.18975	8.33235	8.46419	8.44571	8.56373	8.60833	8.0934	7.98543
ENSMUSG00000008435	Rdh13	6.05505	5.992	5.96969	5.90508	5.82122	6.0016	6.20685	6.1958	6.45793	6.22548	6.27498	6.31596	5.96023	5.93237	5.92051	6.04889	6.18704	6.13362	6.09495	6.15914	6.19843	6.15105	6.08973	6.21152	6.7495	6.30195	6.37436	6.40614	6.32397	6.27613	6.08565	6.03394	6.04899	5.84531	5.98138	5.99119	6.00558	5.9093	6.28686	6.27214	5.9377	6.12318	6.15084	6.15077	6.47527	6.33541	6.05619	5.9393
ENSMUSG00000008450	Nutf2	NA	NA	NA	NA	NA	NA	2.14735	2.14623	2.17734	2.17762	2.14138	2.14988	NA	NA	NA	NA	NA	NA	NA	NA	NA	NA	NA	NA	2.08091	2.0707	2.13851	2.16998	2.12207	2.14776	1.83365	1.88119	1.86796	1.8467	1.89831	1.90705	NA	NA	2.15697	2.15629	NA	NA	NA	NA	2.09671	2.1466	1.86093	1.88402
ENSMUSG00000008475	Arpc5	5.82204	5.88208	6.02542	6.17165	6.07827	6.02653	6.94711	6.85536	6.85674	6.91932	6.93109	6.90318	6.56471	6.4005	6.46632	6.34388	6.55612	6.35856	6.46984	6.43737	6.58077	6.60885	6.6184	6.49106	6.86052	6.97913	6.81663	7.00493	6.77621	6.8922	6.27039	6.26395	6.3374	6.42095	6.35739	6.38775	5.90985	6.09215	6.8864	6.91786	6.47718	6.41952	6.49599	6.57277	6.88542	6.89111	6.29058	6.38869
ENSMUSG00000008489	Elavl2	8.8525	8.96281	9.11518	9.11054	9.05621	9.06829	9.79531	9.69961	9.94672	9.797	9.75377	9.77918	9.59571	9.51403	9.63639	9.46117	9.59205	9.42397	9.79843	9.76726	9.79282	9.83973	9.80683	9.89799	10.3395	9.96717	9.8555	9.83808	9.93434	9.92685	9.6733	9.54787	9.64404	9.75586	9.67842	9.7472	8.97683	9.07835	9.81388	9.77665	9.58204	9.4924	9.78617	9.84818	10.0541	9.89976	9.62174	9.72716
ENSMUSG00000008540	Mgst1	2.52301	2.56036	2.67692	2.55362	2.52959	2.49509	3.3356	3.29208	3.28047	3.30063	3.31073	3.26316	2.81082	2.74577	2.6215	2.67657	2.73218	2.69106	3.27769	3.31613	3.24956	3.27862	3.25017	3.31288	3.09176	3.06771	3.16959	3.26773	3.12409	3.0202	3.45705	3.42632	3.45264	3.65497	3.56946	3.54884	2.58676	2.5261	3.30272	3.2915	2.72603	2.69994	3.28113	3.28056	3.10969	3.13734	3.44533	3.59109
ENSMUSG00000008575	Nfib	7.69029	7.60968	7.89569	7.79199	7.69268	7.79836	8.60584	8.5848	8.51059	8.68947	8.51632	8.52413	8.02889	7.93897	7.85737	7.52133	7.86045	8.05277	8.32181	8.0818	8.26374	8.26434	8.25318	8.25383	8.23619	8.39154	8.39677	8.47035	8.3385	8.49163	7.58804	7.7759	7.87214	7.6668	7.77828	7.68756	7.73189	7.76101	8.56708	8.57664	7.94174	7.81152	8.22245	8.25712	8.3415	8.43349	7.74536	7.71088
ENSMUSG00000008604	Ubqln4	8.02026	7.86268	7.75795	7.8256	7.9461	7.90365	8.61757	8.4805	8.62027	8.50195	8.54062	8.47588	8.26614	8.14333	8.17421	8.19143	8.09767	8.11442	8.39955	8.45659	8.49078	8.38505	8.29794	8.31608	8.66165	8.59085	8.41713	8.60152	8.56386	8.44543	8.1022	8.11108	8.05744	8.01854	7.90812	7.94263	7.8803	7.89178	8.57278	8.50615	8.19456	8.13451	8.44898	8.33302	8.55654	8.53694	8.09024	7.95643
ENSMUSG00000008658	Rbfox1	9.21611	9.30758	9.29903	9.32504	9.29523	9.3284	10.0606	9.86335	10.03	10.0799	9.97206	9.9252	9.69826	9.64111	9.73627	9.51587	9.66507	9.6354	9.89959	9.70183	9.89899	9.90875	9.88319	9.8784	9.97318	10.0479	9.87601	9.98386	9.8661	9.97883	9.73859	9.65047	9.77171	9.49487	9.74656	9.75237	9.27424	9.31622	9.98466	9.99237	9.69188	9.60545	9.83347	9.89012	9.96571	9.94293	9.72026	9.6646
ENSMUSG00000008668	Rps18	4.45636	4.36638	4.25215	4.09138	4.14187	4.21934	4.50875	4.47113	4.56694	4.47894	4.48185	4.66601	4.09759	4.12666	4.09086	4.06561	4.04826	4.13453	4.87497	4.90593	5.20303	4.92807	4.92906	4.84259	5.341	5.18644	5.11771	5.25689	5.17138	5.3987	4.91816	4.82137	4.81546	4.8232	4.71147	4.70016	4.35829	4.15086	4.51561	4.54227	4.10504	4.0828	4.99464	4.89991	5.21505	5.27566	4.85167	4.74494
ENSMUSG00000008683	Rps15a	6.74877	6.79357	6.91532	6.59888	6.40045	6.57891	7.32219	7.21399	7.29075	7.34748	7.21009	7.21867	6.95023	7.00121	6.88949	6.972	6.88715	6.87762	7.27603	7.24966	7.11041	7.37121	7.34656	7.21796	8.08912	7.65631	7.66488	7.83628	7.59226	7.80339	6.72653	6.76789	6.59912	6.73374	6.40674	6.43567	6.81922	6.52608	7.27564	7.25875	6.94697	6.91226	7.21204	7.31191	7.80343	7.74398	6.69785	6.52538
ENSMUSG00000008690	Ncaph2	7.61106	7.38089	7.41638	7.23366	7.37668	7.23044	8.10902	7.9731	8.01194	8.06824	7.99521	7.99765	7.61256	7.75788	7.79548	7.68393	7.67068	7.64437	7.79136	7.79124	7.92919	7.81771	7.78862	7.84235	7.87108	7.81138	7.82575	7.86942	7.85482	7.8844	7.53608	7.35478	7.41333	7.2512	7.40015	7.34653	7.46944	7.28026	8.03135	8.02037	7.72197	7.66633	7.83726	7.81623	7.83607	7.86955	7.43473	7.33263
ENSMUSG00000008730	Hipk1	8.53789	8.51871	8.52688	8.56743	8.62011	8.61237	9.5184	9.62301	9.52263	9.61146	9.57449	9.47531	9.06114	9.29242	9.36914	9.15693	9.33777	9.39199	9.29011	9.32118	9.2427	9.32045	9.30843	9.16542	9.55405	9.78519	9.75895	9.61958	9.58071	9.72341	8.62104	8.93801	8.78187	8.63824	8.65498	8.77657	8.52783	8.59997	9.55468	9.55375	9.2409	9.29556	9.28466	9.26477	9.6994	9.64124	8.78031	8.68993
ENSMUSG00000008734	Gprc5b	10.13	10.1885	10.2454	10.2189	10.3477	10.3958	11.3763	11.8093	11.3119	11.4475	11.5725	11.5483	11.4096	12.1215	12.0089	12.0838	11.9799	11.8911	10.9456	11.1787	10.8062	11.0365	11.0026	10.8067	11.389	11.7567	12.0422	11.4805	11.5699	11.6884	10.4852	10.9813	10.6752	10.5407	10.4588	10.398	10.188	10.3208	11.4992	11.5228	11.8467	11.985	10.9768	10.9486	11.7293	11.5796	10.7139	10.4658
ENSMUSG00000008763	Man1a2	8.35295	8.32734	8.4415	8.34323	8.45459	8.30022	9.31467	9.64009	9.33005	9.38548	9.45267	9.49834	9.32972	9.97124	9.85128	9.97455	9.77647	9.79731	8.95682	9.04684	8.72258	9.08352	9.05284	8.86352	9.30185	9.696	9.85178	9.40358	9.51241	9.58866	8.37164	8.61566	8.48842	8.38027	8.23269	8.22767	8.37393	8.36601	9.42827	9.4455	9.71741	9.84945	8.90875	8.99996	9.61654	9.50155	8.49191	8.28021
ENSMUSG00000008789	Ceacam5	NA	NA	NA	NA	NA	NA	NA	NA	NA	NA	NA	NA	NA	NA	NA	NA	NA	NA	NA	NA	NA	NA	NA	NA	2.26105	2.37742	2.42957	2.21093	2.26541	2.32569	NA	NA	NA	NA	NA	NA	NA	NA	NA	NA	NA	NA	NA	NA	2.35601	2.26734	NA	NA
ENSMUSG00000008822	Acyp1	8.59221	8.73618	8.92563	8.95659	8.69014	8.54144	9.61729	9.39724	9.53291	9.56414	9.47463	9.53636	9.16118	8.77952	8.67955	8.80544	8.94066	8.96156	9.48621	9.44028	9.36325	9.38137	9.49536	9.55909	9.43948	9.37167	9.34268	9.5354	9.60407	9.49779	8.76294	8.60226	8.73138	8.95003	8.69091	8.82823	8.75134	8.72939	9.51581	9.52505	8.87342	8.90255	9.42991	9.47861	9.38461	9.54575	8.69886	8.82305
ENSMUSG00000008855	Hdac5	7.17065	7.34281	7.15054	7.31849	7.34865	7.16574	8.07868	8.07162	8.04689	8.0734	8.21733	8.15203	7.7849	7.96901	7.82077	7.98692	7.92335	7.98052	7.77315	7.81549	7.94099	7.73897	7.82164	7.79697	7.96634	7.92411	8.01657	7.92573	7.96976	7.93898	7.56414	7.5116	7.37872	7.33744	7.59085	7.56952	7.22133	7.27763	8.06573	8.14759	7.85823	7.96359	7.84321	7.78586	7.96901	7.94483	7.48482	7.49927
ENSMUSG00000008859	Rala	6.87123	7.26173	7.00887	7.0598	7.15045	6.90982	7.9021	8.00313	8.01245	7.96242	8.07191	7.99516	7.62483	7.67066	7.58486	7.66486	7.67972	7.63399	7.70947	7.7227	7.59144	7.72382	7.81461	7.67863	7.97428	7.98194	8.01524	8.0533	8.05593	8.07864	7.45104	7.66071	7.47609	7.44541	7.47957	7.38181	7.04727	7.04002	7.97256	8.00983	7.62678	7.65952	7.67453	7.73902	7.99048	8.06262	7.52928	7.4356
ENSMUSG00000008892	Vdac3	7.50936	7.53241	7.53028	7.67672	7.5771	7.59066	8.36992	8.26288	8.2332	8.35717	8.34616	8.27579	7.77955	7.7991	7.75824	7.8471	7.88877	7.87702	8.16071	8.20638	8.1997	8.19518	8.25374	8.26845	8.2305	8.10026	8.24032	8.28959	8.34831	8.32159	7.91949	7.7816	7.90757	7.93183	7.68928	7.91692	7.52401	7.61483	8.28866	8.32637	7.77896	7.87096	8.18893	8.23912	8.19036	8.31983	7.86955	7.84601
ENSMUSG00000008958	Vps72	5.82504	5.96003	5.97235	5.89089	5.77516	5.822	6.41832	6.32995	6.2918	6.37631	6.36186	6.14675	5.87806	5.94653	5.75345	5.90679	5.8865	6.08304	6.22757	6.17233	6.25386	6.18009	6.2065	6.16587	6.22569	6.22324	6.30909	6.28547	6.31604	6.23234	6.03305	6.11272	6.065	6.01107	6.09856	6.17068	5.91914	5.82935	6.34669	6.29497	5.85935	5.95878	6.21792	6.18415	6.25267	6.27795	6.07026	6.09344
ENSMUSG00000008976	Gabpa	6.04689	6.20527	6.27313	6.15048	6.11929	5.9777	6.95388	6.82646	6.88248	7.03795	6.86146	6.87779	6.37493	6.26864	6.31459	6.28089	6.25881	6.31503	6.68192	6.64868	6.72118	6.6927	6.72641	6.80543	6.94245	6.87612	6.73513	6.90909	6.89238	6.83574	6.50349	6.51022	6.49861	6.49216	6.47048	6.44067	6.1751	6.08249	6.88761	6.92574	6.31939	6.28491	6.68393	6.74151	6.85123	6.87907	6.50411	6.46777
ENSMUSG00000008999	Bmp7	1.95509	1.96275	2.07477	2.00726	1.96788	2.04953	2.7231	2.71464	2.71621	2.74709	2.68558	2.70661	2.68891	2.85729	2.7632	2.68482	2.71132	2.78365	3.10079	3.10292	3.07403	3.12415	3.02885	3.05822	2.50885	2.46575	2.48295	2.49838	2.43222	2.44469	2.37636	2.34223	2.36426	2.33422	2.33194	2.36926	1.99754	2.00822	2.71799	2.71309	2.7698	2.7266	3.09258	3.0704	2.48585	2.45843	2.36095	2.34514
ENSMUSG00000009013	Dynll1	9.04926	8.56451	8.62013	8.56652	8.60336	8.67041	9.19523	9.06329	9.39125	9.19477	9.02111	9.08548	8.80173	8.71262	8.71041	8.57627	8.80564	8.67123	9.18674	9.32014	9.52867	9.34852	9.16546	9.14227	9.72458	9.29791	9.15785	9.20563	9.32123	9.3006	8.54177	8.46218	8.65327	8.60518	8.58292	8.47309	8.74463	8.61343	9.21659	9.10045	8.74159	8.68438	9.34518	9.21875	9.39344	9.27582	8.55241	8.55373
ENSMUSG00000009030	Pdcl	7.78815	8.04009	8.03362	8.06958	8.0808	7.91988	8.71243	8.78098	8.82915	8.78938	8.86233	9.01121	8.32504	8.22399	8.17249	8.50938	8.24732	8.32422	8.39299	8.29212	8.43164	8.37786	8.40085	8.39485	8.19042	8.41688	8.41689	8.58139	8.61287	8.56966	7.89301	8.03244	8.07011	7.90784	7.95623	7.84962	7.95396	8.02342	8.77419	8.88764	8.24051	8.36031	8.37225	8.39119	8.3414	8.58797	7.99852	7.90456
ENSMUSG00000009035	Tmem184b	8.11931	8.19768	8.03903	8.07435	8.26737	8.47242	9.05185	9.36352	9.14482	9.12806	9.28142	9.2918	8.98931	9.78268	9.56724	9.83518	9.45866	9.62529	8.72441	8.89324	8.64717	8.65953	8.67656	8.56044	8.88337	9.28998	9.50832	9.16152	9.13678	9.25751	8.22509	8.48214	8.28641	8.15211	8.10533	8.04859	8.11867	8.27138	9.18673	9.23376	9.44641	9.63971	8.75494	8.63218	9.22722	9.18527	8.33121	8.10201
ENSMUSG00000009073	Nf2	5.90643	5.76129	5.85583	5.77699	5.76456	5.75457	6.5693	6.66914	6.63878	6.65449	6.57644	6.67181	6.10675	6.17787	6.20007	6.4875	6.30736	6.51354	6.43284	6.38904	6.41603	6.51544	6.44809	6.48143	6.83176	6.67577	6.71149	6.71139	6.70708	6.74019	6.02838	6.26892	6.12365	6.15141	6.04819	6.18	5.84118	5.76537	6.62574	6.63425	6.16156	6.43613	6.41264	6.48165	6.73967	6.71955	6.14032	6.12653
ENSMUSG00000009075	Cabp7	7.69802	7.85111	7.23518	7.44732	7.52945	7.65531	8.26322	8.1939	8.28426	8.20908	8.22313	8.26886	7.90974	8.41614	8.2437	8.46387	8.17779	8.34367	7.97731	8.08695	8.06132	7.98451	7.94796	7.98577	8.08278	8.27712	8.42333	8.23386	8.37473	8.25091	7.59076	7.62615	7.5709	7.57966	7.64991	7.62763	7.59477	7.54403	8.24713	8.23369	8.18986	8.32844	8.04186	7.97275	8.26107	8.2865	7.59593	7.61906
ENSMUSG00000009076	Zmat5	6.03291	6.104	6.08566	5.79174	5.69822	5.83416	6.4759	6.31782	6.35628	6.50218	6.3515	6.34706	6.04212	6.12552	5.89522	5.93208	5.87343	6.07605	6.77712	6.78582	6.80231	6.69817	6.70087	6.88109	6.9013	6.72909	6.86646	6.78367	6.84376	6.6424	6.34537	6.32745	6.20264	6.20969	6.28889	6.30056	6.07419	5.77471	6.38334	6.40024	6.02096	5.96052	6.78841	6.76005	6.83228	6.75661	6.29182	6.26638
ENSMUSG00000009079	Ewsr1	6.17582	6.36066	6.2135	6.01984	6.23181	6.17217	6.82325	6.73918	6.83294	6.85038	6.76867	6.87153	6.55683	7.1057	7.12861	7.2645	6.97399	6.92754	6.60716	6.57902	6.56398	6.62878	6.77412	6.69957	6.97289	6.84453	6.98826	6.9515	6.74388	7.00464	7.41154	7.4399	7.33637	7.44641	7.56116	7.5208	6.24999	6.14127	6.79846	6.8302	6.93038	7.05534	6.58339	6.70082	6.93523	6.90001	7.39594	7.50946
ENSMUSG00000009090	Ap1b1	10.0383	9.73492	9.5111	9.5659	9.59863	9.66873	10.3561	10.0785	10.3824	10.3016	10.2189	10.2178	9.77002	9.67483	9.72104	9.74855	9.68339	9.6568	10.1324	10.0578	10.4384	10.1611	10.0142	10.3377	10.5482	9.97708	9.88582	10.1573	10.1365	10.0023	10.2807	9.96137	10.1268	10.1275	10.388	10.2564	9.76144	9.61109	10.2723	10.2461	9.72196	9.69624	10.2095	10.171	10.137	10.0987	10.123	10.2573
ENSMUSG00000009097	Tbx1	2.3434	2.21783	2.08321	2.01315	2.10521	2.03501	2.04626	2.03299	2.02063	2.00133	2.03833	1.98844	1.74503	1.75422	1.66764	1.79382	1.67447	1.78955	NA	NA	NA	NA	NA	NA	NA	NA	NA	NA	NA	NA	NA	NA	NA	NA	NA	NA	2.21481	2.05112	2.03329	2.00937	1.7223	1.75261	NA	NA	NA	NA	NA	NA
ENSMUSG00000009112	Bcl2l13	5.69335	5.82091	5.48873	5.81353	5.72816	5.79467	6.50783	6.51576	6.53084	6.446	6.59512	6.45829	6.36518	6.33947	6.47803	6.4818	6.33519	6.43545	6.26645	6.14595	6.32496	6.24458	6.19624	6.17642	6.44177	6.41796	6.43079	6.35258	6.51681	6.28977	6.16701	6.196	6.15923	6.2203	6.38197	6.13383	5.66766	5.77879	6.51815	6.4998	6.39423	6.41748	6.24579	6.20575	6.43017	6.38639	6.17408	6.24537
ENSMUSG00000009207	Lnpk	9.17352	9.66329	9.92354	9.92801	9.7487	9.62729	10.9421	11.0944	10.6622	10.9	10.8834	10.8919	10.8775	11.2582	11.2372	11.1407	11.1622	11.1079	10.7829	10.8113	10.3653	10.6657	10.8489	10.6365	10.8611	11.2805	11.4204	11.0541	11.1196	11.1728	9.96405	10.2729	10.1569	10.1377	9.78817	9.83616	9.58678	9.768	10.8995	10.8918	11.1243	11.1369	10.6532	10.7171	11.1873	11.1155	10.1313	9.92068
ENSMUSG00000009216	Fam163b	3.83507	3.85039	3.83182	3.89157	3.91988	4.04461	4.04483	4.07941	4.05949	4.10153	4.04929	4.06336	3.633	3.65963	3.72235	3.59354	3.80683	3.70625	3.97309	3.92656	3.96519	3.96771	4.02844	3.95936	4.16748	4.21103	4.0746	4.09909	3.86767	4.05636	3.96882	3.93913	3.82607	3.89169	3.96641	4.06584	3.83909	3.95202	4.06125	4.07139	3.67166	3.70221	3.95495	3.98517	4.15104	4.0077	3.91134	3.97465
ENSMUSG00000009281	Rarres2	4.53677	4.262	4.57785	4.62368	4.64463	4.49054	5.21539	5.24348	5.11324	5.2252	5.32774	5.26897	5.3427	5.58799	5.41135	5.01124	5.4123	5.30844	4.56227	4.46958	4.48262	4.5783	4.52542	4.53395	5.26388	5.10872	5.23915	5.06854	5.07235	4.98204	4.9731	5.30324	5.13117	5.29594	5.24707	5.23688	4.45887	4.58628	5.1907	5.27397	5.44735	5.24399	4.50482	4.54589	5.20392	5.04098	5.13584	5.25996
ENSMUSG00000009291	Pttg1ip	3.08562	2.97869	3.07231	3.03202	3.01089	3.06255	4.04429	4.10224	4.06799	4.05524	4.11263	4.07198	3.73553	3.80176	3.59957	3.51096	3.655	3.62643	3.83556	3.70545	3.74669	3.78329	3.82782	3.77466	3.58649	3.68411	3.60549	3.63259	3.59102	3.62807	3.18467	3.10185	3.16599	3.19299	3.16382	3.16254	3.04554	3.03515	4.07151	4.07995	3.71229	3.59746	3.76257	3.79525	3.62536	3.61723	3.15083	3.17311
ENSMUSG00000009292	Trpm2	6.81412	6.74516	6.64517	6.69408	6.69808	6.78303	7.51282	7.64555	7.54374	7.49882	7.6774	7.61626	7.31001	7.46956	7.46064	7.66908	7.39653	7.36692	7.17734	7.19261	7.20314	7.21898	7.23997	7.22377	7.67764	7.63787	7.68771	7.52512	7.57253	7.59145	7.18855	7.32087	6.9707	7.00587	7.23041	7.10373	6.73482	6.72506	7.56737	7.59749	7.4134	7.47751	7.19103	7.22757	7.66774	7.56303	7.16004	7.11334
ENSMUSG00000009293	Ube2g2	5.60571	5.37829	5.16741	5.20435	5.29079	5.30969	5.67337	5.68719	5.6	5.67318	5.74475	5.72056	5.13924	5.20762	5.16391	5.17634	5.22557	5.27382	5.64137	5.53956	5.55843	5.57217	5.60277	5.52804	5.47249	5.53323	5.56649	5.65385	5.65078	5.61802	4.99521	5.14245	5.22686	5.194	5.26581	5.17925	5.38381	5.26828	5.65352	5.71283	5.17026	5.22524	5.57979	5.56766	5.52407	5.64088	5.1215	5.21302
ENSMUSG00000009376	Met	2.9934	3.06398	3.11555	3.17054	3.14854	3.04446	4.69753	4.7546	4.63348	4.70422	4.57563	4.62867	4.72954	5.2417	5.02739	4.85212	4.80759	4.84362	4.34074	4.437	4.37478	4.4	4.43289	4.26883	5.29651	5.40763	5.27393	5.10921	4.9987	5.25636	4.19244	4.30671	4.16211	4.21958	4.16709	4.1709	3.05764	3.12118	4.69521	4.63618	4.99954	4.83444	4.38417	4.36724	5.32602	5.12142	4.22042	4.18586
ENSMUSG00000009394	Syn2	9.8721	9.6654	9.48618	9.57034	9.56022	9.54376	10.4126	10.2185	10.3235	10.3955	10.3358	10.2403	9.82775	9.61731	9.69262	9.57185	9.75289	9.67443	10.2728	10.0939	10.3527	10.2596	10.2407	10.3702	10.3863	10.1208	10.113	10.3367	10.2954	10.1149	10.1956	10.0606	10.1776	10.2251	10.261	10.3421	9.67456	9.55811	10.3182	10.3239	9.71256	9.66639	10.2398	10.2902	10.2067	10.249	10.1446	10.2761
ENSMUSG00000009406	Elk1	5.31859	5.35078	5.38526	5.31187	5.29987	5.25679	6.05294	5.95977	6.00771	5.91021	5.84312	5.99646	5.31687	5.14456	5.07346	5.12416	5.06984	5.07556	5.77998	5.61281	5.7225	5.56379	5.60031	5.67523	5.7934	6.04705	6.08335	6.09179	5.92607	6.00823	5.61423	5.59247	5.61658	5.61843	5.64272	5.77009	5.35154	5.28951	6.00681	5.9166	5.1783	5.08986	5.7051	5.61311	5.9746	6.0087	5.60776	5.67708
ENSMUSG00000009418	Nav1	7.39457	7.53661	7.17533	7.25348	7.48543	7.3896	7.97162	7.8091	7.97866	7.88506	7.91483	7.98697	7.50782	7.40186	7.40384	7.51251	7.3777	7.24508	7.88817	7.93153	7.91544	7.72309	7.78917	7.92152	7.79478	7.74306	7.71677	7.77254	7.83844	7.64654	7.54225	7.62033	7.46494	7.3957	7.62384	7.58871	7.36884	7.37617	7.91979	7.92895	7.43784	7.37843	7.91171	7.81126	7.75154	7.75251	7.54251	7.53608
ENSMUSG00000009470	Tnpo1	6.7868	6.73538	6.77167	6.7658	6.75166	6.76893	7.5466	7.4058	7.42486	7.58427	7.54861	7.45328	7.19255	6.96643	7.11525	7.02083	7.08693	7.10591	7.38885	7.3801	7.48985	7.40555	7.41148	7.44902	7.46286	7.38095	7.50833	7.5583	7.60646	7.55	7.40073	7.16736	7.25663	7.54136	7.4373	7.48954	6.76461	6.76213	7.45909	7.52872	7.09141	7.07122	7.4196	7.42202	7.45072	7.57159	7.27491	7.4894
ENSMUSG00000009535	Rnmt	8.36737	8.60582	8.91623	8.80167	8.53024	8.57935	9.62132	9.5186	9.54358	9.64082	9.60739	9.5015	9.11855	8.73448	8.87164	8.74488	8.94791	8.96336	9.5938	9.54299	9.50085	9.48097	9.6165	9.53238	9.63672	9.63314	9.55488	9.69445	9.73611	9.6808	9.35099	9.13396	9.38561	9.55103	9.37563	9.29407	8.62981	8.63709	9.56117	9.58324	8.90822	8.88538	9.54588	9.54328	9.60824	9.70378	9.29019	9.40691
ENSMUSG00000009549	Srp14	7.39233	7.63871	7.77719	7.55031	7.70182	7.74931	8.37362	8.38592	8.47171	8.48151	8.4515	8.43946	8.07438	8.00819	7.94887	8.0504	8.03957	8.02297	8.3593	8.25538	8.27671	8.34274	8.32487	8.21289	8.44698	8.57503	8.59509	8.63624	8.54035	8.67768	8.06356	8.1497	8.08959	8.14256	8.11193	8.0209	7.60274	7.66715	8.41042	8.45749	8.01048	8.03765	8.29713	8.2935	8.53903	8.61809	8.10095	8.09179
ENSMUSG00000009551	6330409D20Rik	NA	NA	NA	NA	NA	NA	2.45976	2.38968	2.41905	2.40253	2.43982	2.40552	2.09381	1.98205	2.06667	2.00183	2.06621	2.00408	2.42898	2.44643	2.39846	2.44281	2.39634	2.44381	2.69986	2.66005	2.76366	2.71513	2.77929	2.7339	NA	NA	NA	NA	NA	NA	NA	NA	2.42283	2.41596	2.04751	2.02404	2.42462	2.42765	2.70786	2.74278	NA	NA
ENSMUSG00000009555	Cdk9	6.30715	6.20859	6.06245	5.99782	6.05894	5.99526	6.98258	6.89624	6.98594	6.92901	6.9193	6.92906	6.27406	6.29695	6.19243	6.13336	6.24809	6.28853	6.68672	6.63184	6.74534	6.66942	6.61231	6.66582	6.8392	6.85269	6.70651	6.90034	6.78659	6.86131	6.48859	6.37314	6.50861	6.37148	6.52342	6.32249	6.19273	6.01734	6.95492	6.92579	6.25448	6.22332	6.68797	6.64918	6.79947	6.84941	6.45678	6.40579
ENSMUSG00000009563	Tor2a	3.7891	3.84127	3.68619	3.85969	3.91043	3.97762	4.7535	4.79158	4.79222	4.8055	4.75297	4.77748	4.73918	4.90751	4.94376	4.82822	4.80358	4.95742	4.5478	4.51587	4.55308	4.40803	4.42763	4.48269	4.80652	4.59301	4.57532	4.63244	4.60014	4.55424	3.62343	3.54252	3.66954	3.66714	3.6836	3.69324	3.77219	3.91591	4.7791	4.77865	4.86348	4.86307	4.53892	4.43945	4.65829	4.59561	3.61183	3.68133
ENSMUSG00000009566	Fpgs	2.33934	2.38158	2.36383	2.34146	2.43577	2.32005	3.14957	3.15454	3.18546	3.11763	3.13724	3.20159	1.65352	1.49464	1.59347	1.56329	1.45385	1.46414	2.62515	2.5836	2.60653	2.63126	2.62914	2.58615	2.70673	2.70898	2.73891	2.75359	2.70673	2.78101	2.57822	2.58633	2.57877	2.61417	2.58547	2.53808	2.36158	2.36576	3.16319	3.15215	1.58054	1.49376	2.60509	2.61551	2.71821	2.74711	2.58111	2.57924
ENSMUSG00000009569	Mrtfb	7.3564	7.56436	7.57404	7.53564	7.66564	7.55545	8.49329	8.46752	8.46687	8.48727	8.39197	8.47607	8.11105	8.04827	7.95197	7.92472	8.08744	7.92354	8.33764	8.39588	8.26242	8.35531	8.30932	8.23211	8.76891	8.68329	8.59992	8.60042	8.59019	8.66032	8.24709	8.30341	8.25656	8.37839	8.51704	8.42033	7.49827	7.58558	8.47589	8.45177	8.0371	7.97856	8.33198	8.29891	8.68404	8.61698	8.26902	8.43859
ENSMUSG00000009575	Cbx5	8.78741	8.84418	9.13867	8.88116	8.71993	8.84208	9.5597	9.67548	9.73325	9.61086	9.52798	9.71289	9.43801	9.37758	9.3879	9.41065	9.37085	9.43705	9.48966	9.54331	9.64505	9.6863	9.6344	9.48439	10.0972	10.0165	9.94491	9.92145	9.94528	10.0156	9.20178	9.13408	9.15614	9.14689	8.98258	9.064	8.92342	8.81439	9.65614	9.61724	9.40116	9.40618	9.55934	9.6017	10.0195	9.96077	9.164	9.06449
ENSMUSG00000009614	Sardh	NA	NA	NA	NA	NA	NA	NA	NA	NA	NA	NA	NA	NA	NA	NA	NA	NA	NA	1.84006	1.78958	1.78879	1.84089	1.8026	1.84167	NA	NA	NA	NA	NA	NA	NA	NA	NA	NA	NA	NA	NA	NA	NA	NA	NA	NA	1.80614	1.82839	NA	NA	NA	NA
ENSMUSG00000009621	Vav2	4.30978	4.37156	4.51882	4.40596	4.38145	4.40955	5.15627	5.19809	5.3493	5.1091	5.12708	5.29028	4.56351	4.51895	4.3367	4.43384	4.43214	4.53443	4.67216	4.74606	4.74472	4.68471	4.65905	4.64874	4.47655	4.55767	4.57379	4.55931	4.63121	4.57745	4.46331	4.4157	4.42879	4.56039	4.57854	4.46674	4.40005	4.39899	5.23456	5.17549	4.47305	4.4668	4.72098	4.66417	4.536	4.58932	4.43594	4.53523
ENSMUSG00000009628	Tex15	NA	NA	NA	NA	NA	NA	2.39031	2.36707	2.36602	2.38972	2.37241	2.37955	2.80414	2.73901	2.86155	2.68762	2.73755	2.84123	2.70535	2.71193	2.62536	2.67062	2.67625	2.66025	3.16565	3.15911	3.23375	3.20262	3.17384	3.14102	2.48313	2.50285	2.51402	2.53558	2.58308	2.60678	NA	NA	2.37447	2.38056	2.80156	2.75547	2.68088	2.66904	3.18617	3.17249	2.5	2.57515
ENSMUSG00000009630	Ppp2cb	9.29908	8.92108	8.92906	9.00489	8.90692	9.05893	9.68261	9.57371	9.83547	9.62199	9.69932	9.76765	9.15096	9.10455	9.12868	9.21517	9.16882	9.22676	9.43944	9.49311	9.5505	9.53268	9.44474	9.46217	9.69188	9.58738	9.58528	9.70722	9.71295	9.61847	9.05892	9.04969	9.09683	9.0339	9.14644	9.10102	9.04974	8.99024	9.69726	9.69632	9.12806	9.20358	9.49435	9.47987	9.62151	9.67955	9.06848	9.09379
ENSMUSG00000009633	G0s2	3.57853	3.55708	3.68086	3.65975	3.59351	3.60101	4.32078	4.43175	4.30018	4.38725	4.3756	4.34304	4.05058	4.08609	3.93857	3.93116	3.96002	3.92179	4.21106	4.21914	4.24523	4.21072	4.23917	4.18198	4.3154	4.26047	4.34954	4.29805	4.26278	4.18127	4.05441	3.91373	3.9808	3.98001	4.09221	3.9963	3.60549	3.61809	4.3509	4.36863	4.02508	3.93766	4.22515	4.21062	4.30847	4.24737	3.98298	4.02284
ENSMUSG00000009640	Dmap1	6.90626	6.85402	6.57434	6.6985	6.64154	6.57286	7.17957	7.12429	7.18214	7.21613	7.21895	7.1406	6.95185	6.67256	6.80998	6.81206	6.7108	6.66102	7.08473	6.97557	7.12723	7.01899	7.04743	7.22673	7.04293	7.00055	6.99829	7.04133	7.00371	7.06931	7.06229	7.07008	6.92341	6.98917	6.95968	7.071	6.7782	6.63763	7.162	7.19189	6.81146	6.72796	7.06251	7.09772	7.01392	7.03812	7.01859	7.00662
ENSMUSG00000009647	Mcu	6.54205	6.49718	6.64134	6.63792	6.63078	6.55801	7.45864	7.35811	7.3678	7.38102	7.37855	7.41267	6.92743	6.81562	6.91798	6.75887	6.85691	6.75287	7.15216	6.96071	7.11802	7.01676	7.13967	7.0711	7.18343	7.14656	7.2155	7.2638	7.21244	7.23233	6.93046	6.87426	7.05006	7.0068	7.00086	7.13885	6.56019	6.6089	7.39485	7.39075	6.88701	6.78955	7.07696	7.07584	7.18183	7.23619	6.9516	7.04884
ENSMUSG00000009681	Bcr	7.0931	7.02653	6.8084	7.00049	6.98781	7.14384	7.67036	7.64636	7.69291	7.66783	7.78393	7.68737	7.40745	7.25223	7.09579	7.18955	7.13333	7.19471	7.42122	7.35746	7.45287	7.32222	7.34776	7.48876	7.50112	7.07342	7.05208	7.11721	7.17807	7.07981	7.07606	7.02937	7.01576	6.95674	7.17227	7.19058	6.97601	7.04405	7.66987	7.71304	7.25182	7.17253	7.41052	7.38625	7.20887	7.12503	7.04039	7.10653
ENSMUSG00000009687	Fxyd5	NA	NA	NA	NA	NA	NA	NA	NA	NA	NA	NA	NA	NA	NA	NA	NA	NA	NA	1.75766	1.70419	1.70984	1.68744	1.68583	1.78411	NA	NA	NA	NA	NA	NA	1.74508	1.76285	1.79186	1.77179	1.80942	1.80185	NA	NA	NA	NA	NA	NA	1.7239	1.71913	NA	NA	1.7666	1.79435
ENSMUSG00000009731	Kcnd1	5.0146	4.94186	4.88254	5.02877	4.86592	5.06621	5.87278	5.88105	6.06032	5.83542	5.97551	5.98533	5.72718	5.89452	5.86739	5.91333	5.86324	5.65438	4.99709	5.12561	5.11834	5.13102	5.04956	5.08253	5.37017	5.0122	5.35792	5.15485	5.29586	5.17605	5.04119	5.00415	4.98306	4.92308	4.99961	5.06115	4.94633	4.98697	5.93805	5.93209	5.8297	5.81032	5.08035	5.0877	5.24676	5.20892	5.00947	4.99461
ENSMUSG00000009733	Tfcp2	5.69449	5.48977	5.49623	5.46462	5.38544	5.33827	6.28928	6.27203	6.20519	6.32662	6.32944	6.13968	5.58453	5.80987	5.86366	5.76179	5.66989	5.60148	6.10108	6.05511	6.13633	5.98656	6.14075	6.13643	6.28106	6.17495	6.12074	6.15851	6.33666	6.24261	6.29155	6.25554	6.2492	6.18801	6.18913	6.29451	5.56017	5.39611	6.2555	6.26525	5.75269	5.67772	6.09751	6.08791	6.19225	6.24593	6.26543	6.22388
ENSMUSG00000009734	Pou6f2	NA	NA	NA	NA	NA	NA	NA	NA	NA	NA	NA	NA	NA	NA	NA	NA	NA	NA	NA	NA	NA	NA	NA	NA	2.18496	2.19074	2.17712	2.15924	2.21097	2.15901	NA	NA	NA	NA	NA	NA	NA	NA	NA	NA	NA	NA	NA	NA	2.18427	2.17641	NA	NA
ENSMUSG00000009739	Pou6f1	5.06075	4.98111	4.80436	4.79496	4.87195	4.84446	5.69344	5.65815	5.6579	5.77849	5.72573	5.6948	5.57975	5.59259	5.75475	5.54262	5.61082	5.64363	5.36376	5.3934	5.49889	5.44207	5.40351	5.34506	5.9201	5.80424	5.88955	5.78459	5.79752	5.85222	5.22064	5.37743	5.25358	5.11365	5.15961	5.22374	4.94874	4.83712	5.66983	5.73301	5.64236	5.59903	5.41868	5.39688	5.8713	5.81145	5.28388	5.16566
ENSMUSG00000009741	Ubp1	6.64086	6.43271	6.49505	6.82148	6.6789	6.71839	7.30418	7.21491	7.31796	7.3206	7.34987	7.31584	6.89393	6.86425	7.05289	7.01054	7.03494	6.83964	7.09433	7.06015	6.99564	7.14426	7.02664	7.05795	7.14942	7.11908	7.04711	7.28418	7.13539	7.15817	6.74773	6.6358	6.65123	6.64745	6.47666	6.62238	6.52287	6.73959	7.27901	7.32877	6.93702	6.96171	7.05004	7.07628	7.1052	7.19258	6.67825	6.58216
ENSMUSG00000009772	Nuak2	NA	NA	NA	NA	NA	NA	3.05198	3.05461	3.00667	3.0201	3.03895	3.02582	2.0959	2.00226	2.04961	2.04522	2.00152	2.15401	2.98637	2.91069	2.97676	2.93181	2.93436	2.95612	2.60919	2.5447	2.51428	2.6129	2.56533	2.62808	2.47925	2.40258	2.40379	2.47644	2.44741	2.4751	NA	NA	3.03775	3.02829	2.04925	2.06692	2.95794	2.94076	2.55606	2.60211	2.42854	2.46631
ENSMUSG00000009828	Ick	3.71383	3.79704	3.97357	3.86335	3.9493	3.93985	4.7954	4.86799	4.77841	4.80368	4.78606	4.82868	4.70596	4.505	4.48119	4.53015	4.5069	4.55058	4.67126	4.63032	4.51893	4.62714	4.66574	4.6399	4.87684	4.79034	4.82589	4.76672	4.75844	4.89035	4.12374	4.14355	4.19908	4.05875	4.24885	4.12468	3.82815	3.9175	4.81393	4.80614	4.56405	4.52921	4.60684	4.64426	4.83102	4.80517	4.15546	4.14409
ENSMUSG00000009863	Sdhb	9.7549	9.76902	9.71473	9.7111	9.72635	9.67436	10.4636	10.364	10.4533	10.5052	10.4735	10.445	10.1468	9.9847	10.0675	10.0715	10.0284	10.0902	10.3502	10.3728	10.3121	10.312	10.3476	10.4888	10.4299	10.3909	10.3951	10.4779	10.5574	10.4324	10.0938	10.091	10.0983	10.0911	10.1286	10.0946	9.74622	9.70393	10.427	10.4746	10.0663	10.0634	10.345	10.3828	10.4053	10.4892	10.0944	10.1048
ENSMUSG00000009876	Cox4i2	3.79229	3.76202	3.83154	3.7059	3.83631	3.94215	4.31526	4.46008	4.47756	4.39029	4.43127	4.41873	4.08452	4.42045	4.1514	4.34948	4.36048	4.30179	3.69803	3.6935	3.67395	3.70862	3.67417	3.66764	4.20572	4.30007	4.31886	4.32845	4.28183	4.27848	3.49521	3.53581	3.54054	3.49081	3.4116	3.46366	3.79529	3.82812	4.41763	4.41343	4.21879	4.33725	3.68849	3.68347	4.27488	4.29626	3.52385	3.45536
ENSMUSG00000009894	Snap47	10.5287	10.3367	10.0618	10.1705	10.2077	10.2309	10.8546	10.8078	10.957	10.8254	10.8508	10.8938	10.5207	10.5379	10.6288	10.5553	10.5236	10.479	10.6691	10.6882	10.925	10.7603	10.7415	10.8496	11.0635	10.7028	10.6798	10.8138	10.7844	10.7477	10.929	10.813	10.8158	10.9436	11.0116	11.0284	10.3091	10.203	10.8732	10.8567	10.5625	10.5193	10.7608	10.7838	10.8154	10.782	10.8526	10.9945
ENSMUSG00000009905	Kdsr	8.41398	8.23927	8.4887	8.24641	8.2836	8.27122	9.3022	9.5008	9.35721	9.30482	9.35935	9.46859	9.09743	9.57769	9.27466	9.58712	9.35577	9.39662	8.87387	9.00244	8.83879	8.90868	8.89094	8.82744	8.96672	9.30758	9.51103	9.28291	9.39521	9.29918	8.27544	8.46587	8.5294	8.36886	8.36783	8.24811	8.38065	8.26707	9.38674	9.37758	9.31659	9.44651	8.90503	8.87569	9.26178	9.32577	8.42357	8.32827
ENSMUSG00000009907	Vps4b	6.85371	6.99728	7.09569	7.03945	6.94351	6.98456	7.74008	7.63802	7.76892	7.65143	7.66845	7.6936	7.28706	7.16199	7.29006	7.04314	7.21808	7.23667	7.60889	7.53698	7.53351	7.554	7.62983	7.73966	7.68659	7.6869	7.57543	7.59899	7.73712	7.56993	7.52402	7.53203	7.49092	7.62971	7.54511	7.52704	6.98223	6.98917	7.71567	7.67116	7.24637	7.16596	7.55979	7.64117	7.64964	7.63535	7.51566	7.56729
ENSMUSG00000009927	Rps25	4.22346	4.30791	4.28909	4.35564	4.33639	4.28199	4.5613	4.63417	4.65933	4.55441	4.59454	4.536	4.65346	4.74577	4.76854	4.81302	4.77457	4.76527	4.43936	4.40034	4.47596	4.46388	4.52142	4.45695	4.67694	4.75913	4.78878	4.70756	4.67551	4.83253	4.71516	4.73427	4.70076	4.6013	4.58135	4.72794	4.27349	4.32467	4.61827	4.56165	4.72259	4.78429	4.43855	4.48075	4.74161	4.73853	4.71673	4.63686
ENSMUSG00000009995	Taz	5.61026	5.86245	5.68239	5.76667	5.85218	5.87868	6.56138	6.512	6.53489	6.47086	6.55481	6.56496	5.9158	5.83922	5.82622	5.81534	5.74763	6.00812	6.20973	6.23393	6.24034	6.23794	6.17215	6.14909	6.14135	6.28488	6.12979	6.15243	6.04395	6.17075	5.83454	5.93667	5.73066	5.89596	5.84865	5.80664	5.71836	5.83251	6.53609	6.53021	5.86042	5.85703	6.228	6.18639	6.18534	6.12238	5.83396	5.85042
ENSMUSG00000010021	Kif19a	NA	NA	NA	NA	NA	NA	2.22475	2.26967	2.26292	2.27486	2.26679	2.24863	2.02906	2.13182	2.10035	1.98337	1.98114	2.1995	2.17754	2.16362	2.1496	2.1347	2.15845	2.14699	2.47643	2.56567	2.5369	2.51967	2.45332	2.52582	2.32046	2.35375	2.3532	2.42536	2.43399	2.39533	NA	NA	2.25245	2.26343	2.08708	2.05467	2.16359	2.14672	2.52633	2.4996	2.34247	2.41823
ENSMUSG00000010025	Aldh3a2	6.91429	6.97671	6.99452	7.00884	6.99839	6.98643	7.61628	7.5454	7.74598	7.63039	7.66741	7.67563	7.20424	7.07455	6.92541	7.06555	7.06801	7.05594	7.50507	7.40616	7.48604	7.45369	7.46291	7.57941	7.56052	7.5142	7.32439	7.44936	7.55695	7.44554	7.45891	7.48255	7.4485	7.63818	7.64684	7.7635	6.96184	6.99789	7.63588	7.65781	7.06807	7.06317	7.46576	7.49867	7.46637	7.48395	7.46332	7.68284
ENSMUSG00000010045	Tmem115	6.22197	6.21517	6.07098	6.28615	6.30164	6.31197	7.56164	7.76376	7.52606	7.57247	7.53617	7.6594	7.53853	7.86257	7.81125	7.80884	7.75681	7.71668	7.15234	7.30028	7.22801	7.37142	7.16948	7.1435	7.52187	7.9214	8.04902	7.66086	7.54325	7.7043	6.67588	6.8785	6.83073	6.62847	6.67515	6.67344	6.16937	6.29992	7.61715	7.58935	7.73745	7.76078	7.22688	7.22813	7.83076	7.63614	6.79504	6.65902
ENSMUSG00000010047	Hyal2	4.21344	4.1662	4.04774	4.12569	4.1513	4.37865	5.30826	5.33447	5.16794	5.25476	5.23366	5.2715	5.26281	5.56686	5.48119	5.38176	5.24326	5.42066	4.83095	4.90143	4.86747	4.79513	4.82635	4.77901	5.32725	5.47634	5.49187	5.30721	5.42362	5.28623	4.66137	4.679	4.62073	4.64268	4.63232	4.57936	4.14246	4.21855	5.27022	5.25331	5.43695	5.34856	4.86662	4.80016	5.43182	5.33902	4.6537	4.61812
ENSMUSG00000010048	Ifrd2	NA	NA	NA	NA	NA	NA	NA	NA	NA	NA	NA	NA	1.89425	2.01062	1.92314	1.93725	2.05428	1.97147	NA	NA	NA	NA	NA	NA	1.7575	1.76562	1.68301	1.71919	1.77286	1.70718	NA	NA	NA	NA	NA	NA	NA	NA	NA	NA	1.94267	1.98767	NA	NA	1.73537	1.73308	NA	NA
ENSMUSG00000010051	Hyal1	NA	NA	NA	NA	NA	NA	2.38402	2.36732	2.32828	2.33743	2.36518	2.32482	NA	NA	NA	NA	NA	NA	NA	NA	NA	NA	NA	NA	NA	NA	NA	NA	NA	NA	NA	NA	NA	NA	NA	NA	NA	NA	2.35988	2.34248	NA	NA	NA	NA	NA	NA	NA	NA
ENSMUSG00000010054	Tusc2	5.75514	5.95251	5.80178	5.93116	5.87739	6.12643	6.65187	6.96572	6.84333	6.7004	6.75911	6.65605	6.35068	6.72775	6.70087	6.90038	6.44131	6.78999	6.27557	6.34434	6.35503	6.24513	6.3362	6.25862	6.80075	7.13415	7.17068	6.77683	6.92075	7.0572	6.03861	6.16228	6.03474	5.94099	6.06116	6.03261	5.83648	5.97833	6.8203	6.70518	6.5931	6.71056	6.32498	6.27998	7.03519	6.91826	6.07855	6.01159
ENSMUSG00000010057	Nprl2	6.58994	6.51014	6.11785	6.3203	6.36939	6.4129	7.09834	7.06972	7.223	7.11796	7.13626	7.1213	6.64602	6.72869	6.75004	6.76761	6.70387	6.72109	6.91936	6.93109	6.9817	6.89175	6.83711	6.90024	6.86992	6.79655	6.66202	6.91974	6.93082	6.8314	7.04623	6.91195	7.0002	7.02143	7.1526	7.08412	6.40597	6.36753	7.13035	7.12517	6.70825	6.73085	6.94405	6.87636	6.77616	6.89399	6.98613	7.08605
ENSMUSG00000010064	Slc38a3	4.46548	4.52514	4.54766	4.80029	4.69743	4.66661	5.78201	5.91134	5.73467	5.74953	5.80961	5.68342	5.83385	5.67544	5.50592	5.60049	5.55521	5.58945	5.3972	5.23207	5.1098	5.23518	5.3312	5.34949	5.49428	5.43228	5.68363	5.49292	5.46148	5.3926	5.54602	5.70657	5.55422	5.79659	5.91214	5.92016	4.51276	4.72144	5.80934	5.74752	5.67174	5.58172	5.24636	5.30529	5.53673	5.449	5.60227	5.8763
[truncated: 12,844 more rows]
[truncated: 24 more columns]
