# Supplementary material for: Prions induce minor genome-wide translational changes in neurons compared to glia
Source: bioRxiv preprint, doi:10.1101/2020.06.26.172841, version 1 (2020-06-27)
Supplement: Supplementary File 9 [file 172841_file12.xlsx]

## Sheet: SupplementaryFile9
GeneID	MGIsymbol	PTG	baseMean_CamKIIaCX_term	log2FC_CamKIIaCX_term	padj_CamKIIaCX_term	baseMean_CamKIIaHC_term	log2FC_CamKIIaHC_term	padj_CamKIIaHC_term	baseMean_PV_term	log2FC_PV_term	padj_PV_term	baseMean_GFAP_term	log2FC_GFAP_term	padj_GFAP_term	baseMean_Cx3Cr1_term	log2FC_Cx3Cr1_term	padj_Cx3Cr1_term	log2FC_RNAseq_term_ip	padj_RNAseq_term_ip	CamKIIaCX	CamKIIaHC	PV	GFAP	Cx3cr1	RNAseq
ENSMUSG00000063897		none	10.2955	0.514508	NA	8.35849	-1.14669	NA	7.66571	-0.169624	0.994132	20.8901	0.105477	0.910294	14.6492	-0.259548	0.914247	NA	NA	none	none	none	none	none	none
ENSMUSG00000095742		none	125.278	-0.108255	0.897505	75.6047	-0.125552	0.920898	39.0017	-0.00810759	0.997323	115.002	1.56447	2.6572e-10	237.259	1.88766	5.33711e-09	NA	NA	none	none	none	increasing	increasing	none
ENSMUSG00000095041		none	72.633	0.939803	NA	37.3349	0.387392	0.733675	24.2832	-0.0989663	0.994132	40.371	0.0273956	0.975452	18.2877	-0.98791	0.478003	NA	NA	none	none	none	none	none	none
ENSMUSG00000007777	0610009B22Rik	none	84.4357	0.181759	NA	145.502	0.0135993	0.989562	151.197	0.0703614	0.993224	138.129	-0.094587	0.819442	54.0199	0.206109	0.875211	-0.00079	0.9985	none	none	none	none	none	none
ENSMUSG00000043644	0610009L18Rik	none	12.6	1.04144	NA	11.8622	-1.13664	NA	6.26941	0.373979	0.989253	33.5862	0.485994	0.348091	NA	NA	NA	0.1531	0.76	none	none	none	none	none	none
ENSMUSG00000042208	0610010F05Rik	none	294.319	-0.261626	0.503613	407.865	0.194883	0.72453	260.461	0.101489	0.979024	139.659	0.343986	0.275686	47.9893	0.0750844	0.96708	-0.03128	0.8713	none	none	none	none	none	none
ENSMUSG00000107002	0610012G03Rik	none	66.3241	-0.0328973	NA	45.6095	-0.0147157	0.99277	51.5964	0.0942716	0.994132	71.4941	-0.19968	0.681017	15.2894	1.4264	0.313486	-0.2163	0.2286	none	none	none	none	none	none
ENSMUSG00000058706	0610030E20Rik	none	NA	NA	NA	4.01547	-0.39799	NA	NA	NA	NA	8.094	-0.573908	0.614797	28.781	-0.350406	0.823593	0.1529	0.3241	none	none	none	none	none	none
ENSMUSG00000089889	0610040B10Rik	none	15.3706	0.65965	NA	15.1152	-0.369296	0.866068	6.78921	0.286459	0.991361	26.4847	1.25009	0.00996261	NA	NA	NA	0.2635	0.5976	none	none	none	increasing	none	none
ENSMUSG00000087341	0610040F04Rik	none	NA	NA	NA	NA	NA	NA	NA	NA	NA	NA	NA	NA	NA	NA	NA	0.3876	0.3825	none	none	none	none	none	none
ENSMUSG00000060512	0610040J01Rik	none	NA	NA	NA	NA	NA	NA	NA	NA	NA	40.632	-0.213538	0.698387	76.8689	-0.62592	0.380101	0.4138	0.1442	none	none	none	none	none	none
ENSMUSG00000090066	1110002E22Rik	none	12.1134	-0.586088	NA	5.85651	1.06	NA	NA	NA	NA	3.16574	0.279554	0.90602	NA	NA	NA	NA	NA	none	none	none	none	none	none
ENSMUSG00000071456	1110002L01Rik	none	21.6025	0.325264	NA	13.2518	-0.0391572	0.990412	9.03515	-0.978788	0.77722	29.3656	-1.09985	0.0171131	7.54894	0.107689	0.981228	-0.3453	0.08654	none	none	none	decreasing	none	none
ENSMUSG00000030663	1110004F10Rik	none	397.48	-0.141319	0.746834	439.229	0.450178	0.166258	231.954	0.208328	0.878246	282.468	0.468437	0.0870808	68.3993	0.683892	0.375017	0.02752	0.8626	none	none	none	none	none	none
ENSMUSG00000039195	1110008P14Rik	none	721.989	-0.0121847	0.983613	322.212	-0.363552	0.192105	277.853	0.186168	0.915168	352.874	1.19482	3.42466e-10	19.3291	-6.67007e-05	0.999934	-0.2907	0.2201	none	none	none	increasing	none	none
ENSMUSG00000045237	1110012L19Rik	none	37.6246	0.570453	NA	28.8121	-0.122277	0.955215	29.5437	0.176874	0.991361	40.7873	-0.0699626	0.919287	14.2464	0.00496713	0.997941	0.1415	0.6379	none	none	none	none	none	none
ENSMUSG00000028441	1110017D15Rik	none	7.24346	-0.596871	NA	4.50654	-0.556726	NA	9.07292	0.738562	0.911216	35.0505	-0.628186	0.259724	NA	NA	NA	0.2088	0.6674	none	none	none	none	none	none
ENSMUSG00000085151	1110018N20Rik	none	20.7088	0.115437	NA	7.06519	-1.10615	NA	NA	NA	NA	7.05733	0.336237	0.806194	NA	NA	NA	NA	NA	none	none	none	none	none	none
ENSMUSG00000097616	1110019D14Rik	none	NA	NA	NA	NA	NA	NA	NA	NA	NA	21.4297	-0.276297	0.713891	5.05902	0.38792	0.926487	-0.08976	0.8735	none	none	none	none	none	none
ENSMUSG00000037971	1110032A03Rik	none	61.2877	-0.0702826	NA	56.6211	0.0209932	0.989562	61.6147	0.155257	0.980148	85.4622	0.212855	0.588998	25.007	0.0148675	0.993629	0.03468	0.8697	none	none	none	none	none	none
ENSMUSG00000046999	1110032F04Rik	none	23.2157	-0.788449	NA	8.38452	-0.370777	NA	NA	NA	NA	5.37868	0.274265	0.866621	NA	NA	NA	-1.148	1.198e-07	none	none	none	none	none	decreasing
ENSMUSG00000092203	1110038B12Rik	none	30.7706	0.242547	NA	59.9696	0.629346	0.383235	21.403	0.100102	0.994132	70.8567	1.13245	0.000255649	11.9704	0.278787	0.919673	0.6624	0.001239	none	none	none	increasing	none	none
ENSMUSG00000063236	1110038F14Rik	none	46.6567	0.0390394	NA	54.9183	-0.398671	0.674243	32.895	0.106507	0.994132	74.5399	0.703104	0.0275484	30.8929	0.0263189	0.990939	0.3525	0.07923	none	none	none	none	none	none
ENSMUSG00000085457	1110046J04Rik	none	5.80407	0.36787	NA	NA	NA	NA	NA	NA	NA	6.62184	0.971546	0.382386	NA	NA	NA	0.1391	0.7893	none	none	none	none	none	none
ENSMUSG00000040591	1110051M20Rik	none	490.407	0.323051	0.329554	590.464	-0.0951634	0.838155	288.251	0.351862	0.4354	201.717	0.0151632	0.974202	33.3065	-0.586695	0.642835	-0.2456	0.0358	none	none	none	none	none	none
ENSMUSG00000035171	1110059E24Rik	none	98.7686	-0.121163	0.897505	118.405	0.144261	0.87769	112.403	-0.224015	0.920115	113.4	0.0610579	0.893183	28.9775	0.301316	0.851184	-0.02889	0.9025	none	none	none	none	none	none
ENSMUSG00000032551	1110059G10Rik	none	116.713	-0.394482	0.494568	137.812	0.257897	0.663231	114.102	0.0270799	0.994132	117.571	0.340059	0.317583	95.9824	0.521917	0.440244	0.1313	0.5748	none	none	none	none	none	none
ENSMUSG00000078570	1110065P20Rik	none	38.354	0.615447	NA	44.7999	-0.479684	0.547711	26.2382	-0.0525288	0.994132	42.4525	0.144089	0.811704	7.68765	1.38631	0.569493	-0.1354	0.5097	none	none	none	none	none	none
ENSMUSG00000063320	1190007I07Rik	none	14.1259	0.0177796	NA	29.396	0.0229855	0.991234	27.316	-0.078057	0.994132	32.9432	-0.110215	0.880242	16.5279	-0.34041	0.873931	0.02196	0.964	none	none	none	none	none	none
ENSMUSG00000097290	1300002E11Rik	none	36.3124	0.349356	NA	17.3305	0.82971	0.490545	27.6577	0.0556671	0.994132	59.203	0.229909	0.680508	13.6993	0.60479	0.77725	0.009641	0.9794	none	none	none	none	none	none
ENSMUSG00000096221	1500002C15Rik	none	3.93713	0.281046	NA	NA	NA	NA	NA	NA	NA	NA	NA	NA	NA	NA	NA	NA	NA	none	none	none	none	none	none
ENSMUSG00000098912	1500004A13Rik	none	131.134	0.48541	0.336894	100.331	-0.109245	0.917417	115.041	0.195067	0.947673	74.721	0.0591251	0.911425	5.4028	0.355305	0.930512	-0.5879	2.272e-05	none	none	none	none	none	none
ENSMUSG00000068099	1500009C09Rik	none	116.111	0.405549	0.473495	61.2361	-0.710399	0.120799	255.958	-0.0318569	0.994132	329.07	-0.576499	0.00526124	11.1409	-1.02628	0.609008	-0.1731	0.2005	none	none	none	none	none	none
ENSMUSG00000087651	1500009L16Rik	none	20.2027	-0.605841	NA	25.1665	0.0458583	0.983695	10.115	0.253541	0.991361	23.5559	0.939405	0.073536	NA	NA	NA	-0.09055	0.7494	none	none	none	none	none	none
ENSMUSG00000072694	1500011B03Rik	none	61.1531	0.339253	NA	47.4543	-0.232875	0.847581	48.8862	0.0667424	0.994132	45.5398	0.737021	0.0564544	4.40413	2.13042	0.521027	-0.2556	0.02884	none	none	none	none	none	none
ENSMUSG00000097247	1500012K07Rik	none	NA	NA	NA	NA	NA	NA	NA	NA	NA	NA	NA	NA	NA	NA	NA	NA	NA	none	none	none	none	none	none
ENSMUSG00000097383	1500026H17Rik	none	16.9647	-0.569455	NA	20.4595	0.124075	0.959607	13.7563	0.047553	0.994877	50.9742	0.0181983	0.98073	NA	NA	NA	NA	NA	none	none	none	none	none	none
ENSMUSG00000035595	1600002K03Rik	none	7.16483	-1.19014	NA	7.58042	0.465438	NA	NA	NA	NA	11.5383	-0.730104	0.398354	11.7487	1.89782	0.301975	-0.4921	0.2081	none	none	none	none	none	none
ENSMUSG00000050088	1600012H06Rik	none	65.7999	-0.0521845	NA	55.4747	0.154161	0.908168	72.1754	-0.336392	0.853254	88.551	-0.157583	0.728939	69.0117	0.547391	0.493472	0.1373	0.4612	none	none	none	none	none	none
ENSMUSG00000054676	1600014C10Rik	none	65.0415	0.124727	NA	63.5264	-0.081388	0.959077	73.4908	-0.053647	0.994132	68.3195	0.64431	0.0595471	69.9186	1.41213	0.0223957	0.106	0.5271	none	none	none	none	increasing	none
ENSMUSG00000097048	1600020E01Rik	none	7.9242	-0.355779	NA	7.7503	-0.219662	NA	4.58068	1.17337	0.844214	11.092	0.381853	0.720384	NA	NA	NA	-0.0565	0.8942	none	none	none	none	none	none
ENSMUSG00000057818	1600029O15Rik	none	4.70548	0.390052	NA	6.15836	0.692879	NA	NA	NA	NA	NA	NA	NA	NA	NA	NA	0.09079	0.8387	none	none	none	none	none	none
ENSMUSG00000075511	1700001L05Rik	none	8.74051	0.999743	NA	6.06676	0.660487	NA	NA	NA	NA	NA	NA	NA	NA	NA	NA	-0.1058	0.6944	none	none	none	none	none	none
ENSMUSG00000021534	1700001L19Rik	none	75.4137	0.0888689	NA	36.2639	-0.49922	0.609054	6.2299	0.0813716	0.994132	29.5942	-0.0506099	0.956043	NA	NA	NA	-0.9275	0.0004882	none	none	none	none	none	none
ENSMUSG00000044320	1700001O22Rik	none	5.07487	1.0607	NA	NA	NA	NA	NA	NA	NA	NA	NA	NA	NA	NA	NA	-0.1095	0.8018	none	none	none	none	none	none
ENSMUSG00000030030	1700003E16Rik	none	59.3463	-0.0605959	NA	28.7038	0.0154031	0.993322	7.98073	-0.1113	0.994132	27.805	-0.23259	0.734578	NA	NA	NA	-0.4352	0.05071	none	none	none	none	none	none
ENSMUSG00000085389	1700003M07Rik	none	8.30239	0.64525	NA	8.36925	-0.351641	NA	NA	NA	NA	86.8934	-0.896964	0.00414143	NA	NA	NA	-0.4569	0.00171	none	none	none	none	none	none
ENSMUSG00000026831	1700007K13Rik	none	15.5849	-0.515037	NA	6.1401	-1.45243	NA	7.72166	0.540805	0.957654	63.6845	0.00868405	0.988927	NA	NA	NA	0.4741	0.3427	none	none	none	none	none	none
ENSMUSG00000089730	1700007P06Rik	none	NA	NA	NA	NA	NA	NA	NA	NA	NA	NA	NA	NA	NA	NA	NA	-0.2574	0.75	none	none	none	none	none	none
ENSMUSG00000023873	1700010I14Rik	none	5.62919	0.283031	NA	8.69165	0.838161	NA	NA	NA	NA	6.43034	0.842532	0.474538	12.7118	-0.142105	0.96708	0.6813	0.1188	none	none	none	none	none	none
ENSMUSG00000110424	1700012D14Rik	none	NA	NA	NA	NA	NA	NA	4.99143	-0.550475	0.975974	7.60691	0.776941	0.503147	NA	NA	NA	1.079	0.043	none	none	none	none	none	increasing
ENSMUSG00000027886	1700013F07Rik	none	6.61103	0.173079	NA	5.91567	0.291147	NA	4.80834	1.44383	0.739079	7.64254	-0.722789	0.513773	NA	NA	NA	0.2445	0.6204	none	none	none	none	none	none
ENSMUSG00000051054	1700014D04Rik	none	11.8215	0.188858	NA	3.3818	0.154568	NA	NA	NA	NA	NA	NA	NA	NA	NA	NA	NA	NA	none	none	none	none	none	none
ENSMUSG00000053783	1700016K19Rik	none	NA	NA	NA	NA	NA	NA	NA	NA	NA	7.35142	-0.176867	0.90855	NA	NA	NA	-0.4619	0.5366	none	none	none	none	none	none
ENSMUSG00000032300	1700017B05Rik	none	21.2527	1.31922	NA	33.9651	0.362505	0.770243	14.2756	-0.0780374	0.994132	41.126	0.0217304	0.97907	204.857	-0.27137	0.698458	0.4698	0.01274	none	none	none	none	none	none
ENSMUSG00000043629	1700019D03Rik	none	20.9116	-0.474938	NA	9.32222	-0.13736	NA	20.3752	0.0256614	0.995591	25.4366	-0.249849	0.729845	NA	NA	NA	0.1826	0.6905	none	none	none	none	none	none
ENSMUSG00000019797	1700021F05Rik	none	107.661	-0.621988	0.210623	137.521	0.292511	0.567418	140.61	0.0945783	0.98964	113.387	0.171163	0.680271	32.324	0.0741636	0.97384	-0.2041	0.2935	none	none	none	none	none	none
ENSMUSG00000032666	1700025G04Rik	none	87.206	-0.152835	NA	109.662	-0.0626619	0.959607	85.1187	-0.103445	0.991361	90.9546	-0.00179941	0.996753	10.4972	-0.528078	0.83164	-0.3176	0.002748	none	none	none	none	none	none
ENSMUSG00000038782	1700028J19Rik	none	NA	NA	NA	4.25102	-1.31422	NA	4.61684	0.532545	0.979472	NA	NA	NA	NA	NA	NA	-0.2716	0.5948	none	none	none	none	none	none
ENSMUSG00000033053	1700028P14Rik	none	4.12233	-1.06874	NA	4.3776	-0.350075	NA	12.1404	-0.0597078	0.994132	13.7999	-0.292857	0.767672	NA	NA	NA	0.03045	0.9666	none	none	none	none	none	none
ENSMUSG00000071103	1700029J07Rik	none	NA	NA	NA	NA	NA	NA	NA	NA	NA	12.7675	0.353627	0.713849	NA	NA	NA	0.2686	0.3542	none	none	none	none	none	none
ENSMUSG00000031847	1700030J22Rik	none	28.991	-0.303122	NA	24.669	-0.686698	0.510948	9.91648	-0.201194	0.993224	13.5253	-1.03072	0.17568	NA	NA	NA	-0.1789	0.5273	none	none	none	none	none	none
ENSMUSG00000052794	1700030K09Rik	none	43.2343	-0.316009	NA	39.9121	0.229798	0.88127	20.1874	-0.343012	0.958839	17.6707	-0.266096	0.747215	14.5082	-0.955958	0.593542	-0.07162	0.773	none	none	none	none	none	none
ENSMUSG00000055833	1700034H15Rik	none	6.04747	1.26591	NA	NA	NA	NA	NA	NA	NA	NA	NA	NA	NA	NA	NA	-0.4324	0.1777	none	none	none	none	none	none
ENSMUSG00000005983	1700037C18Rik	none	33.7451	0.735628	NA	14.2591	0.126243	0.968456	12.5748	0.823647	0.80582	18.9946	0.274874	0.746245	6.3245	1.25069	0.64925	0.4568	0.2743	none	none	none	none	none	none
ENSMUSG00000027327	1700037H04Rik	none	188.873	-0.0744268	0.920049	138.293	-0.322424	0.504325	133.409	-0.0410572	0.994132	101.046	0.11606	0.795453	18.7511	0.507139	0.791088	-0.09452	0.7028	none	none	none	none	none	none
ENSMUSG00000097515	1700040D17Rik	none	NA	NA	NA	NA	NA	NA	NA	NA	NA	NA	NA	NA	NA	NA	NA	NA	NA	none	none	none	none	none	none
ENSMUSG00000085549	1700047F07Rik	none	14.758	-0.374081	NA	NA	NA	NA	12.9133	-0.689028	0.879134	NA	NA	NA	NA	NA	NA	NA	NA	none	none	none	none	none	none
ENSMUSG00000043773	1700048O20Rik	none	NA	NA	NA	NA	NA	NA	3.89465	2.4331	0.485157	NA	NA	NA	NA	NA	NA	-0.7722	0.01183	none	none	none	none	none	none
ENSMUSG00000099681	1700052K11Rik	none	11.4911	-0.225594	NA	12.5864	0.386916	0.876272	9.48557	-0.192047	0.994132	12.1283	0.193651	0.858821	NA	NA	NA	-0.1144	0.7526	none	none	none	none	none	none
ENSMUSG00000038323	1700066M21Rik	none	76.4728	-0.0973488	NA	76.9824	-0.292191	0.690279	25.6312	-0.412431	0.921766	68.4891	-0.484847	0.179915	7.43833	0.738838	0.805584	-0.2093	0.1613	none	none	none	none	none	none
ENSMUSG00000071265	1700086L19Rik	none	606.485	-0.378195	0.117467	635.963	-0.0515203	0.935363	37.366	0.279091	0.956332	407.879	-0.104691	0.767323	12.3429	0.468334	0.841764	-0.3616	0.05777	none	none	none	none	none	none
ENSMUSG00000097080	1700086O06Rik	none	8.78918	-0.0816354	NA	11.3068	-0.0260368	NA	NA	NA	NA	10.3123	0.405107	0.712435	NA	NA	NA	0.2637	0.4696	none	none	none	none	none	none
ENSMUSG00000115099	1700087I21Rik	none	18.4525	0.892507	NA	24.9231	0.111965	0.960503	6.62261	-0.372628	0.98655	10.8917	0.702592	0.42705	NA	NA	NA	NA	NA	none	none	none	none	none	none
ENSMUSG00000033029	1700088E04Rik	none	29.3315	0.241689	NA	22.9364	0.248954	0.90142	11.9355	0.447481	0.957654	79.9867	0.16457	0.713849	NA	NA	NA	0.09987	0.8064	none	none	none	none	none	none
ENSMUSG00000101856	1700096K18Rik	none	NA	NA	NA	4.38563	-1.98675	NA	NA	NA	NA	12.5899	0.0510324	0.970642	6.23298	0.270507	0.950407	0.3235	0.4493	none	none	none	none	none	none
ENSMUSG00000097675	1700101I11Rik	none	8.35111	0.297547	NA	4.38071	0.606483	NA	NA	NA	NA	5.098	1.20658	0.338231	NA	NA	NA	0.4266	0.359	none	none	none	none	none	none
ENSMUSG00000091329	1700112D23Rik	none	NA	NA	NA	NA	NA	NA	4.85905	-0.0509308	0.995591	4.77854	1.80629	0.16902	NA	NA	NA	NA	NA	none	none	none	none	none	none
ENSMUSG00000097527	1700112J16Rik	none	NA	NA	NA	NA	NA	NA	5.47274	-0.423383	0.983338	5.21388	0.447421	0.784079	NA	NA	NA	NA	NA	none	none	none	none	none	none
ENSMUSG00000096935	1700113A16Rik	none	4.74428	-2.21929	NA	NA	NA	NA	NA	NA	NA	24.2679	-0.129643	0.874493	NA	NA	NA	0.347	0.4835	none	none	none	none	none	none
ENSMUSG00000100599	1700120C14Rik	none	NA	NA	NA	NA	NA	NA	NA	NA	NA	5.97912	0.0536842	0.97907	NA	NA	NA	-0.05047	NA	none	none	none	none	none	none
ENSMUSG00000085614	1700123M08Rik	none	10.3049	-0.213378	NA	9.36658	0.464187	NA	11.6313	0.0840773	0.994132	29.1479	0.296987	0.626291	4.27103	0.116568	0.985448	0.5528	0.2443	none	none	none	none	none	none
ENSMUSG00000040822	1700123O20Rik	none	39.0323	-0.0894409	NA	29.9175	-0.41379	0.748092	38.3348	0.445516	0.81473	61.4335	-0.511992	0.157857	31.1433	0.220734	0.897864	-0.08114	0.7526	none	none	none	none	none	none
ENSMUSG00000078607	1810010H24Rik	none	9.29404	-0.255776	NA	5.27759	0.4826	NA	8.48978	0.861227	0.845149	17.4158	-0.456622	0.538344	NA	NA	NA	0.2305	0.5412	none	none	none	none	none	none
ENSMUSG00000022507	1810013L24Rik	none	415.403	-0.191315	0.645627	460.217	-0.338931	0.169846	415.526	-0.0257948	0.994132	517.511	-0.321881	0.115779	120.173	0.791709	0.123497	0.06478	0.7006	none	none	none	none	none	none
ENSMUSG00000044145	1810024B03Rik	none	NA	NA	NA	4.18287	-0.225292	NA	3.84729	1.32393	0.836211	23.6115	-0.0970435	0.910537	7.08385	0.915671	0.759364	0.3268	0.6001	none	none	none	none	none	none
ENSMUSG00000101970	1810026B05Rik	none	24.7427	-0.109016	NA	25.8587	-0.561666	0.636294	30.4455	-0.0536774	0.994132	49.2619	-0.0885401	0.887739	8.29317	1.11223	0.639262	0.114	0.6686	none	none	none	none	none	none
ENSMUSG00000044148	1810030O07Rik	none	52.3335	-0.278034	NA	71.084	-0.204157	0.828962	46.7552	-0.00516737	0.997323	87.4059	0.343089	0.320254	80.9305	-0.114464	0.923162	0.09724	0.6197	none	none	none	none	none	none
ENSMUSG00000054091	1810037I17Rik	none	82.6859	0.0625335	NA	27.0145	0.0645934	0.978534	44.0496	0.0157714	0.995891	246.355	0.390265	0.150973	59.2599	-0.293672	0.797552	0.2743	0.07378	none	none	none	none	none	none
ENSMUSG00000035372	1810055G02Rik	none	109.684	0.17574	0.815417	72.0067	0.288285	0.710946	84.3844	0.0523853	0.994132	97.2848	0.552193	0.0614972	10.7882	0.431795	0.870751	-0.07146	0.7121	none	none	none	none	none	none
ENSMUSG00000073155	1810058I24Rik	none	70.3112	-0.383185	NA	87.2475	-0.0944465	0.941925	59.6239	0.35496	0.861781	299.032	1.28552	7.69599e-11	106.712	1.06435	0.0391875	0.8071	8.503e-07	none	none	none	increasing	increasing	none
ENSMUSG00000084925	1810062O18Rik	none	NA	NA	NA	4.05302	0.00130354	NA	NA	NA	NA	5.00349	1.64376	0.185853	NA	NA	NA	0.6065	0.2217	none	none	none	none	none	none
ENSMUSG00000063018	2010204K13Rik	none	158.283	-0.600561	0.145546	236.822	0.176113	0.747529	34.7824	0.109813	0.994132	186.582	0.00694595	0.987013	5.54096	0.438722	0.916006	-0.306	0.1466	none	none	none	none	none	none
ENSMUSG00000026090	2010300C02Rik	none	2323.52	-0.147795	0.601936	3840.12	0.326007	0.0868947	138.485	-0.0311002	0.994132	667.786	-0.241521	0.841143	34.8765	-1.34108	0.132474	-0.1168	0.572	none	none	none	none	none	none
ENSMUSG00000074829	2010315B03Rik	none	42.273	-0.260791	NA	76.281	0.00213111	0.998738	41.5125	0.0135602	0.997183	49.0188	-0.215765	0.713684	23.5292	0.630409	0.665983	-0.0485	0.8337	none	none	none	none	none	none
ENSMUSG00000100691	2010320M18Rik	none	17.753	-0.020894	NA	8.87477	-0.64031	NA	16.3181	0.0768887	0.994132	51.7267	0.635555	0.0898366	5.8448	1.26323	0.692418	0.4609	0.2448	none	none	none	none	none	none
ENSMUSG00000021550	2210016F16Rik	none	57.8467	-0.29854	NA	84.8774	-0.0802647	0.950034	31.7642	0.610652	0.673365	67.4881	0.0919621	0.876357	63.7683	0.588466	0.49988	0.3847	0.05866	none	none	none	none	none	none
ENSMUSG00000029559	2210016L21Rik	none	814.289	-0.0316008	0.951136	693.175	-0.0835187	0.858949	325.414	-0.00572011	0.997323	274.528	-0.255707	0.389782	50.7701	0.412817	0.697422	-0.1559	0.2595	none	none	none	none	none	none
ENSMUSG00000087380	2210408F21Rik	none	80.4211	-0.0781539	NA	46.4464	0.180404	0.902987	26.0977	-0.0959234	0.994132	92.2587	0.514196	0.0927915	5.33426	1.83123	0.519044	-0.141	0.6534	none	none	none	none	none	none
ENSMUSG00000071252	2210408I21Rik	none	270.657	-0.193267	0.696441	291.818	0.117893	0.848676	170.282	0.19346	0.932376	142.493	-0.257443	0.400022	25.2919	0.307354	0.8645	-0.1266	0.6592	none	none	none	none	none	none
ENSMUSG00000032403	2300009A05Rik	none	12.2594	0.316332	NA	19.3909	0.55631	0.708157	27.5018	-0.291456	0.958839	25.3094	-0.365818	0.578058	6.44361	1.03878	0.754818	-0.00201	0.9977	none	none	none	none	none	none
ENSMUSG00000098332	2310009A05Rik	none	59.7039	-0.288247	NA	80.1989	0.0938071	0.937195	59.1109	-0.16982	0.977753	90.6864	-0.233166	0.525286	41.3277	0.668586	0.512936	-0.01186	0.9849	none	none	none	none	none	none
ENSMUSG00000079283	2310009B15Rik	none	7.99162	0.354515	NA	9.68136	0.883167	NA	12.788	0.485784	0.950864	16.8353	-0.0850616	0.935587	3.37178	0.718615	0.892324	-0.03942	0.9359	none	none	none	none	none	none
ENSMUSG00000097162	2310010J17Rik	none	5.6974	-0.700252	NA	4.03528	-0.0524325	NA	5.01123	-0.986859	0.892104	53.8587	0.520492	0.243961	5.52295	2.09842	0.452718	0.5112	0.2335	none	none	none	none	none	none
ENSMUSG00000020133	2310011J03Rik	none	116.937	0.328115	0.58928	54.9994	-0.0377086	0.981872	61.3566	-0.0215333	0.995591	115.042	0.11887	0.775117	50.5812	-0.00972306	0.994728	-0.06198	0.7611	none	none	none	none	none	none
ENSMUSG00000049643	2310022A10Rik	none	147.241	0.143473	0.830638	116.436	-0.331193	0.529992	84.2801	0.135027	0.980148	59.2652	-0.120868	0.820634	40.4373	0.933891	0.346154	-0.06262	0.7635	none	none	none	none	none	none
ENSMUSG00000031983	2310022B05Rik	none	42.4366	0.364677	NA	37.0478	1.49977	0.00381949	64.5098	0.1967	0.970586	515.279	-0.625017	0.00232962	28.1221	-0.258286	0.879578	0.08664	0.6197	none	increasing	none	none	none	none
ENSMUSG00000032062	2310030G06Rik	none	17.0907	-0.333878	NA	5.24902	0.293032	NA	7.63526	0.0598666	0.994877	7.19089	-0.161131	0.917994	NA	NA	NA	-0.3539	0.4318	none	none	none	none	none	none
ENSMUSG00000020441	2310033P09Rik	none	30.2359	0.0875074	NA	46.8142	-0.218891	0.858949	20.9349	-0.63334	0.817022	22.7403	0.56039	0.397707	31.9544	-0.571149	0.644825	-0.1357	0.5774	none	none	none	none	none	none
ENSMUSG00000062619	2310039H08Rik	none	NA	NA	NA	6.44321	0.160274	NA	6.67269	0.818113	0.920035	19.9849	0.77452	0.253008	7.39226	0.501457	0.876113	1.302	0.004281	none	none	none	none	none	increasing
ENSMUSG00000072852	2310040G07Rik	none	6.75724	-0.418907	NA	5.73003	-0.985119	NA	NA	NA	NA	22.6983	0.584594	0.329891	NA	NA	NA	NA	NA	none	none	none	none	none	none
ENSMUSG00000101655	2310040G24Rik	none	3.66533	-2.22926	NA	NA	NA	NA	7.80394	-0.0955069	0.994132	4.55158	0.698283	0.638633	20.3226	-1.17979	0.318942	0.8246	0.1186	none	none	none	none	none	none
ENSMUSG00000040177	2310057M21Rik	none	209.173	-0.235877	0.636197	211.157	0.126186	0.856869	154.619	0.246562	0.85529	69.5277	-0.209715	0.640212	22.4952	0.098025	0.969286	-0.2182	0.2398	none	none	none	none	none	none
ENSMUSG00000085379	2310058D17Rik	none	NA	NA	NA	NA	NA	NA	6.03787	0.809389	0.922347	NA	NA	NA	NA	NA	NA	NA	NA	none	none	none	none	none	none
ENSMUSG00000050705	2310061I04Rik	none	269.094	-0.122624	0.826793	198.088	-0.0126296	0.989464	242.776	0.0211144	0.994132	137.122	-0.385308	0.156599	18.0361	-0.135899	0.95886	-0.1062	0.5535	none	none	none	none	none	none
ENSMUSG00000045411	2410002F23Rik	none	109.591	0.457907	0.468179	102.504	-0.000880995	0.998967	53.3715	-0.292803	0.924628	32.9974	0.0258293	0.977171	8.58582	-0.653943	0.804988	0.07148	0.6705	none	none	none	none	none	none
ENSMUSG00000036873	2410004B18Rik	none	99.8934	0.0539689	0.962157	94.4229	-0.237046	0.747913	94.6113	-0.163224	0.970586	121.31	-0.0757551	0.856313	33.2649	0.308017	0.835649	-0.1972	0.3028	none	none	none	none	none	none
ENSMUSG00000071398	2410004P03Rik	none	4.64698	0.366273	NA	NA	NA	NA	6.63966	0.411817	0.980148	29.5733	0.116603	0.87444	NA	NA	NA	1.345	6.345e-05	none	none	none	none	none	increasing
ENSMUSG00000086841	2410006H16Rik	none	16.9852	0.260105	NA	9.50388	1.14075	NA	6.94585	-0.321751	0.991361	8.64596	0.398019	0.732605	10.6017	0.292909	0.922514	0.5537	0.004537	none	none	none	none	none	none
ENSMUSG00000073164	2410018L13Rik	none	NA	NA	NA	NA	NA	NA	NA	NA	NA	NA	NA	NA	NA	NA	NA	-0.8447	0.04755	none	none	none	none	none	none
ENSMUSG00000044387	2410080I02Rik	none	NA	NA	NA	3.97083	0.26362	NA	NA	NA	NA	NA	NA	NA	NA	NA	NA	NA	NA	none	none	none	none	none	none
ENSMUSG00000032840	2410131K14Rik	none	54.4235	0.35227	NA	41.9404	-0.437286	0.675557	104.469	-0.0666923	0.994132	74.5555	0.349101	0.359929	24.1667	-0.214931	0.914247	0.08662	0.6571	none	none	none	none	none	none
ENSMUSG00000073236	2500004C02Rik	none	14.0679	0.0955341	NA	11.2672	-0.0921847	NA	8.75468	-0.618195	0.939405	14.5527	-0.00557987	0.995656	NA	NA	NA	0.1677	0.5611	none	none	none	none	none	none
ENSMUSG00000071632	2510002D24Rik	none	23.3335	-0.337257	NA	22.8789	-0.440186	0.759062	13.9335	0.103841	0.994132	15.2498	-0.307881	0.728649	4.96806	1.0681	0.760942	-0.1607	0.4751	none	none	none	none	none	none
ENSMUSG00000043391	2510009E07Rik	none	86.9545	0.0188801	NA	70.1044	-0.00212305	0.998738	37.9172	-0.333226	0.932376	141.336	0.0190782	0.971511	90.9704	0.787113	0.192654	-0.01666	0.9305	none	none	none	none	none	none
ENSMUSG00000044496	2510039O18Rik	none	49.7766	0.194761	NA	40.0152	-0.311139	0.782507	26.7899	0.0634544	0.994132	41.9025	0.0044335	0.994387	54.8844	0.444562	0.656542	0.2973	0.06876	none	none	none	none	none	none
ENSMUSG00000100303	2600014E21Rik	none	4.11224	0.276503	NA	NA	NA	NA	NA	NA	NA	NA	NA	NA	NA	NA	NA	NA	NA	none	none	none	none	none	none
ENSMUSG00000052419	2610001J05Rik	none	107.78	-0.231627	0.7411	108.819	0.00155739	0.998738	130.31	-0.196485	0.943961	257.416	0.128682	0.666631	103.376	0.873418	0.091963	0.1263	0.5028	none	none	none	none	none	none
ENSMUSG00000031242	2610002M06Rik	none	456.189	-0.41893	0.126754	614.532	-0.00305869	0.995927	357.118	0.0727855	0.991361	258.05	-0.0997887	0.754887	49.4629	0.500478	0.659993	-0.3132	0.005824	none	none	none	none	none	none
ENSMUSG00000060301	2610008E11Rik	none	85.2807	-0.327105	NA	196.584	0.619514	0.032117	56.2495	0.585711	0.523358	50.2517	0.367618	0.404724	27.9897	-0.33424	0.849393	0.02826	0.8894	none	none	none	none	none	none
ENSMUSG00000091474	2610021A01Rik	none	103.957	-0.0443452	0.967297	174.902	0.195368	0.723763	79.9181	-0.118548	0.98859	50.8728	-0.367029	0.409493	28.0226	-0.396283	0.8027	NA	NA	none	none	none	none	none	none
ENSMUSG00000087259	2610035D17Rik	none	45.4618	-0.0406476	NA	21.6217	0.406476	0.818962	17.0544	-0.197081	0.991361	38.4669	-0.20479	0.722044	NA	NA	NA	-0.1717	0.4001	none	none	none	none	none	none
ENSMUSG00000071302	2610044O15Rik8	none	80.3125	-0.904741	NA	116.45	-0.27849	0.671809	105.979	-0.0963426	0.991399	64.0051	-0.339952	0.480638	19.096	-0.447329	0.819513	NA	NA	none	none	none	none	none	none
ENSMUSG00000059482	2610301B20Rik	none	238.814	-0.0587615	0.934093	260.282	0.108848	0.881738	167.562	0.235132	0.871485	232.199	0.337805	0.176336	32.3369	0.531554	0.682631	-0.1119	0.4815	none	none	none	none	none	none
ENSMUSG00000100164	2610306M01Rik	none	12.8723	-0.237988	NA	18.5873	-0.105239	0.971467	5.13421	-0.574645	0.973887	28.1266	-0.268791	0.696196	5.27421	-0.322118	0.943265	-0.2303	0.5068	none	none	none	none	none	none
ENSMUSG00000097040	2610316D01Rik	none	35.8552	-0.996647	NA	9.99956	-0.22638	NA	15.1827	0.358403	0.964948	28.4784	0.148642	0.844527	NA	NA	NA	-0.1239	0.8078	none	none	none	none	none	none
ENSMUSG00000010277	2610507B11Rik	none	422.788	0.297076	0.375883	580.926	0.463002	0.0289351	300.943	-0.0183263	0.994132	1276.01	0.391264	0.11421	156.573	-0.550977	0.272875	-0.0746	0.6878	none	none	none	none	none	none
ENSMUSG00000085882	2610507I01Rik	none	20.241	-0.281103	NA	14.8712	-0.385257	0.861572	14.3485	0.400214	0.958839	28.7826	-0.384159	0.506732	10.2012	0.247943	0.93488	-0.226	0.1712	none	none	none	none	none	none
ENSMUSG00000086328	2700033N17Rik	none	4.48206	-1.2044	NA	NA	NA	NA	NA	NA	NA	3.61651	-0.669213	0.698864	NA	NA	NA	NA	NA	none	none	none	none	none	none
ENSMUSG00000034601	2700049A03Rik	none	56.7285	0.555234	NA	74.1667	0.350341	0.621169	97.5521	0.0262502	0.994132	42.5797	-0.571836	0.228715	23.1327	0.0706013	0.979448	-0.0272	0.9189	none	none	none	none	none	none
ENSMUSG00000024273	2700062C07Rik	none	54.0439	-0.91396	NA	59.702	0.173152	0.89153	23.4684	0.233393	0.980439	36.6576	0.295906	0.609336	15.5136	1.10178	0.491336	-0.1154	0.6055	none	none	none	none	none	none
ENSMUSG00000053080	2700081O15Rik	none	41.7565	0.386872	NA	63.5487	-0.0658095	0.968549	5.93686	-0.179773	0.994132	17.3878	-0.335263	0.686934	NA	NA	NA	-0.1671	0.2245	none	none	none	none	none	none
ENSMUSG00000062198	2700097O09Rik	none	22.0684	-0.598833	NA	27.4501	0.17362	0.935363	16.3904	-0.006179	0.997356	31.7791	-0.510117	0.318244	8.19435	-1.26156	0.555852	-0.1808	0.6244	none	none	none	none	none	none
ENSMUSG00000087497	2810001G20Rik	none	19.6769	0.476701	NA	17.8581	-0.356777	0.874378	23.9624	-0.235272	0.979024	29.0591	-0.0258108	0.97856	NA	NA	NA	0.1341	0.6922	none	none	none	none	none	none
ENSMUSG00000045464	2810002D19Rik	none	8.2446	0.182502	NA	11.7584	-0.348492	NA	14.2218	-0.0766413	0.994132	22.7684	-0.815412	0.154263	7.1243	0.860371	0.771627	-0.3533	0.2775	none	none	none	none	none	none
ENSMUSG00000031984	2810004N23Rik	none	41.747	0.0126443	NA	39.6294	-0.0714223	0.970437	27.665	-0.199848	0.983133	114.09	0.0380354	0.939041	35.1644	0.595948	0.612235	-0.1355	0.558	none	none	none	none	none	none
ENSMUSG00000047635	2810006K23Rik	none	41.5221	-0.476455	NA	64.5511	-0.0662148	0.968105	33.7701	-0.604495	0.673697	55.2932	-0.321513	0.503753	38.5188	-0.272681	0.844253	-0.3497	0.09658	none	none	none	none	none	none
ENSMUSG00000099881	2810013P06Rik	none	9.62438	0.865719	NA	10.1793	0.364364	NA	8.16523	0.108014	0.994132	22.1162	-0.518273	0.402072	NA	NA	NA	-0.1468	0.465	none	none	none	none	none	none
ENSMUSG00000020491	2810021J22Rik	none	29.9438	-0.329021	NA	35.5972	-0.403947	0.704777	22.6816	-0.314004	0.960151	24.1211	-0.0966683	0.910294	6.65926	-0.0449715	0.991725	-0.05678	0.8288	none	none	none	none	none	none
ENSMUSG00000049881	2810025M15Rik	none	24.7226	0.357929	NA	43.0914	0.497723	0.585974	30.5957	0.285345	0.957654	27.8507	0.361381	0.59238	53.1494	-0.288257	0.803759	0.1035	0.7545	none	none	none	none	none	none
ENSMUSG00000096995	2810029C07Rik	none	30.5082	-0.0736402	NA	19.9602	0.072812	0.9775	10.4044	0.206444	0.992723	11.6391	0.197076	0.865177	NA	NA	NA	-0.03887	0.8831	none	none	none	none	none	none
ENSMUSG00000037735	2810032G03Rik	none	12.2399	0.194915	NA	9.41523	-0.256144	NA	NA	NA	NA	25.0693	-1.18771	0.0158042	NA	NA	NA	-0.6047	0.02367	none	none	none	decreasing	none	none
ENSMUSG00000099034	2810039B14Rik	none	NA	NA	NA	NA	NA	NA	4.82008	0.395574	0.991361	9.61144	0.287533	0.802195	NA	NA	NA	NA	NA	none	none	none	none	none	none
ENSMUSG00000100891	2810049E08Rik	none	5.66831	0.194458	NA	4.01531	0.144323	NA	NA	NA	NA	6.9153	0.305394	0.834053	NA	NA	NA	0.6547	0.02192	none	none	none	none	none	none
ENSMUSG00000099966	2810402E24Rik	none	NA	NA	NA	NA	NA	NA	NA	NA	NA	6.26532	-0.171852	0.917701	NA	NA	NA	NA	NA	none	none	none	none	none	none
ENSMUSG00000086629	2810403D21Rik	none	7.10718	1.13395	NA	9.03566	0.146012	NA	6.11966	0.426042	0.983491	24.634	0.713194	0.215238	6.76374	1.31018	0.616051	1.397	0.0003439	none	none	none	none	none	increasing
ENSMUSG00000100594	2810414N06Rik	none	5.26962	1.55022	NA	NA	NA	NA	4.89077	-0.446666	0.983338	11.4116	-0.109431	0.927348	5.01915	-0.928386	0.779929	NA	NA	none	none	none	none	none	none
ENSMUSG00000097709	2810429I04Rik	none	7.3009	0.464926	NA	NA	NA	NA	9.94202	-0.168676	0.994132	5.83624	1.06879	0.40048	NA	NA	NA	-0.00833	0.9917	none	none	none	none	none	none
ENSMUSG00000026227	2810459M11Rik	none	9.03206	-0.102844	NA	NA	NA	NA	NA	NA	NA	101.805	0.718559	0.00888504	NA	NA	NA	1.337	2.461e-21	none	none	none	none	none	increasing
ENSMUSG00000102014	2900009J06Rik	none	8.08897	-0.157218	NA	11.4482	-0.211694	NA	6.50677	0.160598	0.994132	4.9703	0.422314	0.786893	NA	NA	NA	-0.7302	0.2222	none	none	none	none	none	none
ENSMUSG00000051339	2900026A02Rik	none	129.644	0.639489	0.134782	243.8	0.0319362	0.9721	11.9592	-0.00985684	0.997323	34.334	0.204869	0.746245	11.4475	-0.092106	0.980441	-0.2601	0.02324	none	none	none	none	none	none
ENSMUSG00000054418	2900041M22Rik	none	NA	NA	NA	7.49772	0.247957	NA	NA	NA	NA	NA	NA	NA	NA	NA	NA	0.1472	0.7919	none	none	none	none	none	none
ENSMUSG00000099696	2900052N01Rik	none	8.58496	0.0096902	NA	NA	NA	NA	NA	NA	NA	528.753	-0.497485	0.0546145	NA	NA	NA	-0.1623	0.2718	none	none	none	none	none	none
ENSMUSG00000071860	2900055J20Rik	none	41.5425	-0.194243	NA	40.2523	0.160018	0.926634	5.08353	-0.0855954	0.994132	12.4001	0.532721	0.544642	NA	NA	NA	-0.1366	0.7949	none	none	none	none	none	none
ENSMUSG00000113621	2900060N12Rik	none	NA	NA	NA	5.12154	-0.289847	NA	NA	NA	NA	6.67646	-0.231526	0.879548	NA	NA	NA	NA	NA	none	none	none	none	none	none
ENSMUSG00000097277	2900076A07Rik	none	8.61355	-0.73743	NA	9.4247	-0.339842	NA	5.99323	-0.530167	0.971512	15.5282	-0.276061	0.752198	NA	NA	NA	-0.03008	0.9477	none	none	none	none	none	none
ENSMUSG00000087038	2900079G21Rik	none	21.7672	0.295635	NA	16.2885	-0.286645	0.909682	4.52306	0.539457	0.977956	10.3775	-0.247716	0.8265	NA	NA	NA	-0.1933	0.6333	none	none	none	none	none	none
ENSMUSG00000102869	2900097C17Rik	none	NA	NA	NA	NA	NA	NA	NA	NA	NA	6.51067	-0.00105048	0.99958	10.6855	-2.33913	0.124761	-0.2414	0.1846	none	none	none	none	none	none
ENSMUSG00000070282	3000002C10Rik	none	9.8489	-0.242959	NA	14.7498	-0.39915	0.856494	7.52454	0.678781	0.939405	4.12407	-0.212804	0.921786	NA	NA	NA	0.04678	0.905	none	none	none	none	none	none
ENSMUSG00000084885	3010001F23Rik	none	NA	NA	NA	NA	NA	NA	NA	NA	NA	NA	NA	NA	NA	NA	NA	0.01958	0.978	none	none	none	none	none	none
ENSMUSG00000079737	3110001I22Rik	none	12.8815	-0.447044	NA	15.3556	0.154712	0.955153	12.866	-0.392613	0.970661	11.2295	-0.469355	0.640646	9.40472	0.23077	0.942858	-0.08998	0.859	none	none	none	none	none	none
ENSMUSG00000026388	3110009E18Rik	none	12.4249	-0.661034	NA	30.0859	-0.00101155	0.999248	10.7577	0.0848172	0.994132	29.4523	-0.17325	0.824271	8.71554	-0.0200036	0.9949	-0.5446	0.3033	none	none	none	none	none	none
ENSMUSG00000104861	3110039M20Rik	none	46.8606	-0.691383	NA	54.2242	0.0188774	0.991234	10.1914	0.14108	0.994132	21.0657	0.378389	0.587103	NA	NA	NA	-0.1161	0.7788	none	none	none	none	none	none
ENSMUSG00000025102	3110040N11Rik	none	30.9938	0.665814	NA	41.716	0.0276499	0.987768	18.9784	-0.436771	0.939405	27.3941	0.223632	0.774543	17.4244	-0.0336038	0.990939	0.2235	0.4281	none	none	none	none	none	none
ENSMUSG00000097503	3110045C21Rik	none	6.55309	-1.22682	NA	5.76749	-0.675717	NA	NA	NA	NA	10.4664	-1.54699	0.050648	NA	NA	NA	-0.1117	0.905	none	none	none	none	none	none
ENSMUSG00000085642	3110053B16Rik	none	NA	NA	NA	NA	NA	NA	NA	NA	NA	NA	NA	NA	NA	NA	NA	NA	NA	none	none	none	none	none	none
ENSMUSG00000085622	3110056K07Rik	none	18.4616	-1.1468	NA	16.7718	-0.296375	0.891674	20.0992	-0.417814	0.9512	53.6195	-0.429998	0.344262	14.7958	-0.0488676	0.988181	-0.06868	0.842	none	none	none	none	none	none
ENSMUSG00000053553	3110082I17Rik	none	20.7278	0.616177	NA	14.1303	0.211372	0.941362	NA	NA	NA	25.0304	0.530386	0.382739	27.0937	2.15724	0.0170551	0.2933	0.2042	none	none	none	none	increasing	none
ENSMUSG00000063364	3300002I08Rik	none	10.0622	-0.108512	NA	10.082	-0.235542	NA	5.23285	-0.111746	0.994132	26.9654	0.205648	0.77208	5.22754	-0.0027021	0.999355	0.1727	0.7741	none	none	none	none	none	none
ENSMUSG00000033111	3830406C13Rik	none	6.55296	-1.41434	NA	6.01815	-1.63611	NA	6.44407	0.254976	0.993823	20.0708	-0.184267	0.824395	4.63947	0.93549	0.806319	-0.05593	0.7817	none	none	none	none	none	none
ENSMUSG00000064202	4430402I18Rik	none	8.39039	0.863477	NA	7.01352	0.665469	NA	6.60125	-0.0751473	0.994132	13.0057	0.572349	0.50396	NA	NA	NA	0.1388	0.695	none	none	none	none	none	none
ENSMUSG00000042579	4632404H12Rik	none	10.5586	-0.257374	NA	13.6197	0.371995	0.875807	13.3905	-0.27089	0.983491	14.8512	0.0736515	0.9482	NA	NA	NA	NA	NA	none	none	none	none	none	none
ENSMUSG00000048106	4632415L05Rik	none	26.9206	-0.149355	NA	12.6669	-0.179188	0.953714	32.7265	-0.271193	0.958839	50.9582	0.21395	0.68715	11.5347	-0.267734	0.924853	0.04276	0.834	none	none	none	none	none	none
ENSMUSG00000097762	4732463B04Rik	none	4.44336	0.51374	NA	NA	NA	NA	NA	NA	NA	NA	NA	NA	NA	NA	NA	NA	NA	none	none	none	none	none	none
ENSMUSG00000053714	4732471J01Rik	none	31.7625	0.160916	NA	16.0115	-0.0681507	0.981412	9.0729	-0.347209	0.980439	13.9184	-0.161515	0.880333	NA	NA	NA	0.1076	0.8049	none	none	none	none	none	none
ENSMUSG00000097350	4732491K20Rik	none	10.325	0.133627	NA	5.23847	0.11675	NA	17.2029	0.244977	0.983338	11.8806	-0.0261411	0.984477	NA	NA	NA	0.3077	0.3799	none	none	none	none	none	none
ENSMUSG00000097697	4833412C05Rik	none	5.2886	0.687401	NA	NA	NA	NA	NA	NA	NA	2.51673	2.58566	0.208958	NA	NA	NA	NA	NA	none	none	none	none	none	none
ENSMUSG00000062822	4833420G17Rik	none	167.366	-0.172788	0.770139	193.435	0.0408255	0.967964	76.8412	0.343013	0.858494	65.4626	-0.105083	0.854412	38.9243	0.359393	0.785498	0.1645	0.2692	none	none	none	none	none	none
ENSMUSG00000074782	4833422C13Rik	none	7.21387	-0.0618299	NA	15.2696	0.205916	0.943861	NA	NA	NA	7.48025	0.608995	0.593283	NA	NA	NA	-0.06356	0.8784	none	none	none	none	none	none
ENSMUSG00000025871	4833439L19Rik	none	149.097	0.147012	0.830602	139.985	0.0420327	0.970437	133.574	-0.0548964	0.994132	331.671	0.282892	0.326935	102.621	0.710354	0.288449	0.02992	0.8491	none	none	none	none	none	none
ENSMUSG00000103103	4833445I07Rik	none	6.66966	0.317746	NA	6.38646	0.0415486	NA	NA	NA	NA	NA	NA	NA	NA	NA	NA	NA	NA	none	none	none	none	none	none
ENSMUSG00000097626	4921504A21Rik	none	4.9682	-0.169513	NA	12.7148	-0.108874	0.974537	19.3318	0.0179204	0.997323	11.4654	0.530537	0.593283	NA	NA	NA	NA	NA	none	none	none	none	none	none
ENSMUSG00000036934	4921524J17Rik	none	42.0291	-0.377677	NA	78.0243	0.145601	0.899594	43.7562	-0.233937	0.964767	23.1681	-0.681452	0.246932	9.54288	0.283162	0.928527	-0.1563	0.6114	none	none	none	none	none	none
ENSMUSG00000104586	4921539H07Rik	none	4.78329	-1.36579	NA	42.3505	0.152459	0.935461	NA	NA	NA	NA	NA	NA	NA	NA	NA	NA	NA	none	none	none	none	none	none
ENSMUSG00000027309	4930402H24Rik	none	215.973	0.0265981	0.978261	234.553	0.291043	0.412211	101.383	0.0969047	0.991361	727.183	-0.259886	0.308202	66.0504	-1.89319	0.000964182	-0.09603	0.4743	none	none	none	none	decreasing	none
ENSMUSG00000046567	4930430F08Rik	none	152.163	-0.0345684	0.97424	256.394	0.0248965	0.977112	124.372	0.141661	0.973802	136.257	-0.217682	0.552635	26.6078	0.0924731	0.968917	0.2371	0.1609	none	none	none	none	none	none
ENSMUSG00000008129	4930432K21Rik	none	29.1173	-0.0123131	NA	23.9783	-0.349935	0.837222	10.8508	0.111115	0.994132	5.92354	0.464648	0.746686	NA	NA	NA	-0.3027	0.4373	none	none	none	none	none	none
ENSMUSG00000021098	4930447C04Rik	none	NA	NA	NA	NA	NA	NA	10.0781	0.562827	0.943961	NA	NA	NA	NA	NA	NA	-0.1558	0.5852	none	none	none	none	none	none
ENSMUSG00000087674	4930447M23Rik	none	49.6108	-0.0863656	NA	34.3979	-0.21708	0.886872	3.79478	-0.427188	0.991361	20.9808	-0.243757	0.75788	NA	NA	NA	NA	NA	none	none	none	none	none	none
ENSMUSG00000106583	4930447N08Rik	none	5.58028	-0.937093	NA	6.01943	-0.195887	NA	NA	NA	NA	NA	NA	NA	NA	NA	NA	NA	NA	none	none	none	none	none	none
ENSMUSG00000082843	4930448K20Rik	none	NA	NA	NA	7.35826	-0.192701	NA	3.92671	1.34446	0.834673	NA	NA	NA	NA	NA	NA	NA	NA	none	none	none	none	none	none
ENSMUSG00000021747	4930452B06Rik	none	45.7906	0.229284	NA	25.2313	0.291475	0.862086	28.6271	0.172369	0.990737	17.9042	0.156167	0.869146	NA	NA	NA	-0.273	0.2447	none	none	none	none	none	none
ENSMUSG00000059920	4930453N24Rik	none	71.1267	-0.320707	NA	78.0961	-0.33492	0.621504	55.203	-0.0584203	0.994132	54.8835	-0.148175	0.774232	27.9436	-0.418271	0.804296	-0.1643	0.4221	none	none	none	none	none	none
ENSMUSG00000087611	4930458D05Rik	none	4.69592	-1.33829	NA	NA	NA	NA	7.00865	-0.379061	0.988481	2.73151	2.71905	0.157195	NA	NA	NA	NA	NA	none	none	none	none	none	none
ENSMUSG00000097284	4930480K23Rik	none	6.41629	-0.189212	NA	6.0631	0.519875	NA	6.15101	0.343228	0.991179	13.1764	-0.30675	0.754525	NA	NA	NA	NA	NA	none	none	none	none	none	none
ENSMUSG00000086938	4930481A15Rik	none	5.59021	0.532476	NA	NA	NA	NA	NA	NA	NA	14.3126	-0.227175	0.824395	9.07109	-0.849799	0.715512	0.0347	0.9552	none	none	none	none	none	none
ENSMUSG00000044906	4930503L19Rik	none	19.2397	-0.573793	NA	31.3344	0.214292	0.899293	16.6766	-0.394388	0.957654	32.7702	0.454131	0.383193	10.4012	0.0596779	0.987552	0.362	0.05106	none	none	none	none	none	none
ENSMUSG00000072762	4930522L14Rik	none	5.3377	0.214617	NA	3.90554	0.558296	NA	10.2338	-0.898087	0.825377	10.9283	0.126786	0.920516	7.8073	-0.298612	0.929638	NA	NA	none	none	none	none	none	none
ENSMUSG00000097276	4930525G20Rik	none	10.6938	-1.42285	NA	9.1752	0.70267	NA	NA	NA	NA	4.76477	0.585853	0.705655	NA	NA	NA	-0.1725	0.7334	none	none	none	none	none	none
ENSMUSG00000085521	4930526A20Rik	none	NA	NA	NA	NA	NA	NA	NA	NA	NA	NA	NA	NA	NA	NA	NA	NA	NA	none	none	none	none	none	none
ENSMUSG00000048905	4930539E08Rik	none	20.1545	0.297593	NA	9.5469	-0.46442	NA	NA	NA	NA	7.50375	0.219065	0.883006	NA	NA	NA	-0.5559	0.06857	none	none	none	none	none	none
ENSMUSG00000097890	4930547M16Rik	none	NA	NA	NA	NA	NA	NA	NA	NA	NA	NA	NA	NA	NA	NA	NA	NA	NA	none	none	none	none	none	none
ENSMUSG00000106791	4930553P18Rik	none	NA	NA	NA	NA	NA	NA	3.49641	0.413767	0.991399	NA	NA	NA	NA	NA	NA	NA	NA	none	none	none	none	none	none
ENSMUSG00000053574	4930563E22Rik	none	NA	NA	NA	NA	NA	NA	2.95095	-2.33424	0.615202	4.73432	-0.420184	0.801981	NA	NA	NA	0.05905	0.897	none	none	none	none	none	none
ENSMUSG00000085084	4930570G19Rik	none	7.20404	0.321856	NA	5.47026	0.690988	NA	4.25694	0.000972216	0.999482	16.2662	-0.315566	0.715681	NA	NA	NA	0.2408	0.2947	none	none	none	none	none	none
ENSMUSG00000031938	4931406C07Rik	none	50.1274	0.15102	NA	69.5019	0.634075	0.190332	28.4487	0.839058	0.461982	384.526	0.592929	0.00112634	145.291	-0.190768	0.823212	0.8748	3.161e-14	none	none	none	none	none	none
ENSMUSG00000066571	4931406P16Rik	none	44.0319	0.179653	NA	40.6018	-0.038028	0.982592	25.7902	0.219302	0.980148	119.659	0.924881	0.000329148	70.2753	0.93073	0.18779	0.2947	0.01749	none	none	none	none	none	none
ENSMUSG00000022179	4931414P19Rik	none	24.8598	-0.06333	NA	25.6523	-0.442661	0.731893	4.50217	0.0578456	0.995591	16.0634	-0.198763	0.833755	5.53252	1.40609	0.62907	0.3827	0.2544	none	none	none	none	none	none
ENSMUSG00000014837	4931428F04Rik	none	63.5643	0.370245	NA	43.2249	-0.186117	0.891674	40.2036	0.1574	0.988481	28.758	0.120483	0.87415	4.58889	-0.281348	0.953894	-0.3035	0.02714	none	none	none	none	none	none
ENSMUSG00000037270	4932438A13Rik	none	1557.08	0.163531	0.668814	1865.28	0.262512	0.380039	1303.23	-0.020374	0.994132	1047.55	-0.184356	0.489787	280.044	-0.41958	0.432187	-0.04963	0.7748	none	none	none	none	none	none
ENSMUSG00000097216	4932441J04Rik	none	15.9736	0.224534	NA	5.38757	-0.27153	NA	4.54853	-0.11225	0.994132	8.26323	-0.469599	0.686013	NA	NA	NA	-0.5131	0.5011	none	none	none	none	none	none
ENSMUSG00000097908	4933404O12Rik	none	15.7885	0.346122	NA	9.77458	-0.120776	NA	NA	NA	NA	8.13001	0.0553777	0.973588	NA	NA	NA	-0.3774	0.0216	none	none	none	none	none	none
ENSMUSG00000026224	4933407L21Rik	none	16.5084	-0.352883	NA	9.1552	0.238587	NA	NA	NA	NA	44.8276	0.20905	0.729845	NA	NA	NA	0.2458	0.5483	none	none	none	none	none	none
ENSMUSG00000112627	4933412E12Rik	none	28.039	-0.302746	NA	19.5049	0.22265	0.925241	NA	NA	NA	14.3464	0.533554	0.531805	9.70127	-0.520445	0.844921	-0.04504	0.9217	none	none	none	none	none	none
ENSMUSG00000113960	4933412O06Rik	none	11.5796	-0.308605	NA	22.4243	-0.120057	0.965216	NA	NA	NA	7.09216	0.19438	0.896668	NA	NA	NA	-0.3326	0.3641	none	none	none	none	none	none
ENSMUSG00000085037	4933421O10Rik	none	12.3081	-0.736943	NA	10.2821	-0.301755	NA	9.88216	-0.0907046	0.994132	13.3941	-0.225607	0.823537	5.55442	1.07526	0.735685	0.163	0.44	none	none	none	none	none	none
ENSMUSG00000102416	4933424G06Rik	none	NA	NA	NA	NA	NA	NA	NA	NA	NA	4.09839	0.905911	0.555081	NA	NA	NA	NA	NA	none	none	none	none	none	none
ENSMUSG00000020807	4933427D14Rik	none	37.4872	0.0748857	NA	41.4631	-0.109747	0.949433	17.0174	-0.282476	0.977956	10.5573	-0.694065	0.443006	8.72796	-0.750014	0.773983	-0.04619	0.7999	none	none	none	none	none	none
ENSMUSG00000086968	4933431E20Rik	none	158.191	0.175208	0.782386	123.18	-0.0725132	0.946329	73.5559	-0.139713	0.983338	294.152	-0.788032	4.06742e-05	11.6655	-0.0176036	0.994958	-0.5456	1.461e-07	none	none	none	none	none	none
ENSMUSG00000027942	4933434E20Rik	none	59.3243	0.504053	NA	46.5736	-0.156993	0.917849	80.774	0.498289	0.577891	192.156	0.0566596	0.897131	36.1737	0.278287	0.84673	0.08687	0.6043	none	none	none	none	none	none
ENSMUSG00000072893	4933439C10Rik	none	5.37595	-0.166845	NA	NA	NA	NA	NA	NA	NA	4.50739	-0.0353251	0.986476	NA	NA	NA	-0.008876	0.978	none	none	none	none	none	none
ENSMUSG00000073147	5031425E22Rik	none	15.6726	-0.0157983	NA	9.67741	-0.221559	NA	10.7157	0.590209	0.930477	14.3841	0.0306237	0.98073	NA	NA	NA	0.2762	0.2621	none	none	none	none	none	none
ENSMUSG00000036046	5031439G07Rik	none	46.5303	0.0713831	NA	47.1412	0.298235	0.782584	22.7134	0.134233	0.993949	102.447	0.430792	0.204902	57.0345	-0.0221342	0.989748	0.04232	0.7918	none	none	none	none	none	none
ENSMUSG00000038152	5033430I15Rik	none	5.26946	0.462338	NA	3.56631	-0.135379	NA	NA	NA	NA	NA	NA	NA	NA	NA	NA	NA	NA	none	none	none	none	none	none
ENSMUSG00000086822	5330413P13Rik	none	6.54299	-1.0458	NA	5.77865	0.288497	NA	NA	NA	NA	5.30603	0.248244	0.887475	NA	NA	NA	0.251	0.5324	none	none	none	none	none	none
ENSMUSG00000054944	5330416C01Rik	none	6.99949	-0.758347	NA	NA	NA	NA	NA	NA	NA	NA	NA	NA	NA	NA	NA	NA	NA	none	none	none	none	none	none
ENSMUSG00000040412	5330417C22Rik	none	337.472	-0.165142	0.704793	302.775	-0.225896	0.517485	105.235	-0.119047	0.983133	164.273	-0.379062	0.262203	17.7866	-1.72806	0.13764	-0.172	0.2622	none	none	none	none	none	none
ENSMUSG00000087620	5330434G04Rik	none	35.7976	-0.220897	NA	33.0241	0.0221124	0.991234	40.8204	-0.247742	0.962425	25.4921	-0.348495	0.58549	NA	NA	NA	-0.5214	0.04315	none	none	none	none	none	none
ENSMUSG00000052291	5330438D12Rik	none	9.65381	-0.090641	NA	13.7188	0.0710911	0.981412	16.698	-0.534449	0.935569	7.54766	0.345194	0.785943	NA	NA	NA	NA	NA	none	none	none	none	none	none
ENSMUSG00000072763	5430403G16Rik	none	8.74917	-0.730931	NA	13.0685	-0.304567	0.909682	6.3744	0.551178	0.966257	5.72404	1.35412	0.248554	5.73588	0.507133	0.894634	NA	NA	none	none	none	none	none	none
ENSMUSG00000085741	5430405H02Rik	none	19.8723	-0.568145	NA	25.996	-0.0222865	0.991677	15.129	0.624215	0.87545	27.559	0.40799	0.523686	4.62262	-0.428593	0.922514	-0.08826	0.8345	none	none	none	none	none	none
ENSMUSG00000097772	5430416N02Rik	none	7.14564	0.117737	NA	NA	NA	NA	3.82685	-0.421785	0.991361	3.57323	2.02792	0.187598	NA	NA	NA	-0.01436	0.979	none	none	none	none	none	none
ENSMUSG00000087174	5530601H04Rik	none	34.6597	-0.752438	NA	28.7313	-0.392676	0.774973	34.2069	-0.0780737	0.994132	57.8075	0.316851	0.520936	12.6659	-0.849658	0.657777	-0.2151	0.4392	none	none	none	none	none	none
ENSMUSG00000087424	5730405O15Rik	none	13.8539	0.825789	NA	7.32935	-0.71524	NA	9.13656	0.501977	0.962425	9.69764	0.0371576	0.980674	NA	NA	NA	0.278	0.6832	none	none	none	none	none	none
ENSMUSG00000073755	5730409E04Rik	none	293.412	-0.0806477	0.895445	234.814	0.0912366	0.909682	297.275	-0.0275487	0.994132	151.985	0.0695895	0.876578	46.1884	-0.0122067	0.993629	-0.3978	5.796e-05	none	none	none	none	none	none
ENSMUSG00000057181	5730455P16Rik	none	389.41	0.0421534	0.944753	504.648	0.0586396	0.931254	351.207	0.199738	0.844214	250.874	0.172805	0.566107	46.4148	0.496397	0.641641	-0.005105	0.9785	none	none	none	none	none	none
ENSMUSG00000029089	5730480H06Rik	none	46.9474	0.196396	NA	49.5017	-0.0357036	0.983695	15.6502	-0.322344	0.974648	46.6466	0.0486202	0.945157	14.0661	0.0885262	0.979819	0.8227	0.01783	none	none	none	none	none	none
ENSMUSG00000032985	5730522E02Rik	none	NA	NA	NA	7.32809	0.0517462	NA	NA	NA	NA	NA	NA	NA	NA	NA	NA	-0.1642	0.7593	none	none	none	none	none	none
ENSMUSG00000110148	5830408C22Rik	none	NA	NA	NA	NA	NA	NA	NA	NA	NA	NA	NA	NA	NA	NA	NA	NA	NA	none	none	none	none	none	none
ENSMUSG00000115007	5830448L01Rik	none	NA	NA	NA	5.07369	0.264267	NA	12.4735	-0.126179	0.994132	7.18762	1.12501	0.287689	NA	NA	NA	NA	NA	none	none	none	none	none	none
ENSMUSG00000103477	5930409G06Rik	none	NA	NA	NA	NA	NA	NA	NA	NA	NA	NA	NA	NA	NA	NA	NA	NA	NA	none	none	none	none	none	none
ENSMUSG00000106951	5930430L01Rik	none	4.7347	-0.510838	NA	9.77082	1.08987	NA	4.07011	1.43997	0.777081	8.29872	-1.21806	0.185301	NA	NA	NA	NA	NA	none	none	none	none	none	none
ENSMUSG00000114590	5930438M14Rik	none	5.21131	-0.299471	NA	NA	NA	NA	NA	NA	NA	NA	NA	NA	NA	NA	NA	NA	NA	none	none	none	none	none	none
ENSMUSG00000022195	6030458C11Rik	none	231.758	0.0473529	0.949269	285.135	0.21861	0.566898	94.072	-0.0519658	0.994132	88.485	0.0741138	0.88357	34.8201	0.586603	0.616615	-0.1406	0.3258	none	none	none	none	none	none
ENSMUSG00000018451	6330403K07Rik	none	684.593	-0.0254751	0.962813	432.022	-0.444613	0.14419	37.6068	0.930399	0.223748	402.276	-0.0996172	0.729845	16.5532	-0.306768	0.893191	-0.4627	8.895e-06	none	none	none	none	none	none
ENSMUSG00000075585	6330403L08Rik	none	22.2545	0.0764675	NA	11.46	-0.253073	NA	8.31656	-0.132984	0.994132	12.5153	-0.267683	0.792851	NA	NA	NA	NA	NA	none	none	none	none	none	none
ENSMUSG00000085227	6330418K02Rik	none	12.0457	0.173939	NA	4.10892	-0.160824	NA	5.41289	0.00411806	0.998298	26.3628	0.538074	0.356177	6.34301	0.646178	0.84942	-0.09621	0.8443	none	none	none	none	none	none
ENSMUSG00000045327	6330549D23Rik	none	6.66916	0.13819	NA	3.69749	-1.44242	NA	NA	NA	NA	NA	NA	NA	NA	NA	NA	-0.01847	0.9826	none	none	none	none	none	none
ENSMUSG00000031824	6430548M08Rik	none	1400.71	0.433516	0.0127087	719.44	0.100714	0.871179	895.316	-0.0111424	0.995591	283.871	-0.257868	0.335488	59.9644	-1.11934	0.0830989	-0.1453	0.3657	none	none	none	none	none	none
ENSMUSG00000037977	6430571L13Rik	none	17.4707	0.127079	NA	5.38811	-0.370884	NA	47.616	-0.147913	0.98964	11.2208	0.271574	0.801322	NA	NA	NA	-0.281	0.4563	none	none	none	none	none	none
ENSMUSG00000108228	6430584L05Rik	none	9.57654	-0.180271	NA	NA	NA	NA	NA	NA	NA	6.62786	0.579641	0.644165	NA	NA	NA	NA	NA	none	none	none	none	none	none
ENSMUSG00000079499	6530402F18Rik	none	33.3559	-0.151059	NA	18.1714	0.550981	0.734629	10.8189	0.506315	0.953003	25.4827	0.375338	0.547378	4.49005	-0.937947	0.794276	-0.02522	0.922	none	none	none	none	none	none
ENSMUSG00000098097	6530403H02Rik	none	NA	NA	NA	NA	NA	NA	NA	NA	NA	NA	NA	NA	NA	NA	NA	NA	NA	none	none	none	none	none	none
ENSMUSG00000072066	6720489N17Rik	none	NA	NA	NA	NA	NA	NA	9.16415	0.831559	0.845149	25.9731	0.234747	0.755295	NA	NA	NA	-0.04457	0.9305	none	none	none	none	none	none
ENSMUSG00000032680	6820408C15Rik	none	4.97762	1.27852	NA	3.40094	1.58474	NA	8.61146	0.510297	0.958839	9.87756	-0.669619	0.508329	NA	NA	NA	0.04289	0.9293	none	none	none	none	none	none
ENSMUSG00000085058	8030453O22Rik	none	14.4074	-0.277702	NA	12.1393	0.344217	NA	NA	NA	NA	10.9398	-1.53052	0.0417575	NA	NA	NA	NA	NA	none	none	none	decreasing	none	none
ENSMUSG00000047466	8030462N17Rik	none	422.219	-0.254871	0.514407	373.732	-0.17021	0.668976	572.609	-0.18869	0.836211	305.096	-0.424405	0.0436915	70.5287	0.448992	0.610654	-0.1696	0.3503	none	none	none	none	none	none
ENSMUSG00000034587	8430429K09Rik	none	20.241	-0.281103	NA	18.0211	0.576686	0.730525	12.0528	0.0417526	0.995591	19.9887	0.0807638	0.932307	NA	NA	NA	0.1145	0.7876	none	none	none	none	none	none
ENSMUSG00000097343	9030407P20Rik	none	6.83469	-1.80688	NA	4.6609	0.712159	NA	4.21228	0.188609	0.994132	8.49828	0.182779	0.892383	NA	NA	NA	NA	NA	none	none	none	none	none	none
ENSMUSG00000030823	9130019O22Rik	none	NA	NA	NA	5.96842	-0.670428	NA	NA	NA	NA	NA	NA	NA	3.91317	-0.0692264	0.991356	0.1201	0.7999	none	none	none	none	none	none
ENSMUSG00000062944	9130023H24Rik	none	13.4851	-0.824353	NA	5.4642	-0.486776	NA	13.9596	0.56042	0.912339	20.4406	0.235443	0.765337	16.0094	0.087049	0.979455	0.5724	0.0625	none	none	none	none	none	none
ENSMUSG00000087022	9130024F11Rik	none	94.6924	-0.471743	NA	28.7322	-0.429341	0.712536	NA	NA	NA	25.2736	-0.220229	0.785141	NA	NA	NA	-0.5342	0.08175	none	none	none	none	none	none
ENSMUSG00000101892	9130401M01Rik	none	36.5561	-0.234007	NA	55.1701	0.063189	0.96924	25.4687	0.191543	0.98964	20.0734	-0.129263	0.891721	10.8876	0.454623	0.881686	-0.2145	0.2744	none	none	none	none	none	none
ENSMUSG00000097145	9230114K14Rik	none	25.1998	-0.630148	NA	23.3422	-0.539871	0.673747	40.9269	-0.26985	0.958938	61.9221	-0.0946677	0.866996	6.75923	0.655171	0.832484	-0.2579	0.6255	none	none	none	none	none	none
ENSMUSG00000107879	9330102E08Rik	none	5.87228	-0.5807	NA	6.92375	0.355133	NA	NA	NA	NA	NA	NA	NA	NA	NA	NA	NA	NA	none	none	none	none	none	none
ENSMUSG00000097842	9330104G04Rik	none	14.4958	0.18172	NA	5.43211	1.06075	NA	12.2625	-0.132101	0.994132	NA	NA	NA	NA	NA	NA	NA	NA	none	none	none	none	none	none
ENSMUSG00000097061	9330151L19Rik	none	8.70108	-0.144427	NA	5.79214	0.40627	NA	6.2854	1.2263	0.758855	4.52042	0.932026	0.509955	NA	NA	NA	-0.05822	0.7799	none	none	none	none	none	none
ENSMUSG00000073154	9330158H04Rik	none	4.56972	0.172113	NA	NA	NA	NA	4.54728	-1.33326	0.836341	NA	NA	NA	NA	NA	NA	NA	NA	none	none	none	none	none	none
ENSMUSG00000004360	9330159F19Rik	none	9.82855	-0.12477	NA	4.26551	0.464263	NA	5.29138	0.460243	0.980148	86.9484	-0.365661	0.414413	4.70297	-3.73129	0.130659	-0.3474	0.006295	none	none	none	none	none	none
ENSMUSG00000109536	9330162G02Rik	none	17.985	-0.383948	NA	9.3051	0.479124	NA	6.85337	0.274198	0.991776	9.04653	-0.143613	0.917873	NA	NA	NA	NA	NA	none	none	none	none	none	none
ENSMUSG00000039133	9330171B17Rik	none	5.30824	1.15318	NA	NA	NA	NA	NA	NA	NA	NA	NA	NA	NA	NA	NA	NA	NA	none	none	none	none	none	none
ENSMUSG00000097166	9330179D12Rik	none	14.2823	-0.0340547	NA	6.56694	-0.605977	NA	4.62727	-0.675669	0.962425	15.2727	0.849611	0.221797	NA	NA	NA	-0.5433	0.1624	none	none	none	none	none	none
ENSMUSG00000056004	9330182L06Rik	none	359.844	-0.0965554	0.843926	271.208	-0.389311	0.219602	701.685	-0.210961	0.908037	301.638	0.122821	0.737629	30.0045	-1.39166	0.132987	-0.3955	0.02061	none	none	none	none	none	none
ENSMUSG00000059939	9430015G10Rik	none	31.7042	-0.126584	NA	16.7404	0.262546	0.909682	19.8263	-0.269644	0.977337	23.3767	-0.0873873	0.923289	6.51659	-0.732696	0.811141	-0.1371	0.436	none	none	none	none	none	none
ENSMUSG00000054457	9430021M05Rik	none	45.4225	0.217622	NA	6.91498	-0.651021	NA	7.53229	-0.0671694	0.994537	18.2797	0.355434	0.677622	NA	NA	NA	-0.1115	0.8446	none	none	none	none	none	none
ENSMUSG00000040139	9430038I01Rik	none	4.47211	0.258395	NA	NA	NA	NA	NA	NA	NA	8.02053	0.0405154	0.980674	7.07379	1.33476	0.609708	0.07344	0.9054	none	none	none	none	none	none
ENSMUSG00000086155	9430041J12Rik	none	9.4302	0.139271	NA	3.82717	0.505644	NA	11.2273	-0.202226	0.992723	43.3906	0.0232737	0.979257	NA	NA	NA	0.4046	0.2887	none	none	none	none	none	none
ENSMUSG00000102344	9430053O09Rik	none	7.33081	-1.24928	NA	23.5491	-0.443872	0.757972	4.27293	-0.0388131	0.997183	13.2843	-0.08863	0.938138	NA	NA	NA	NA	NA	none	none	none	none	none	none
ENSMUSG00000097360	9430065F17Rik	none	6.61124	-0.56119	NA	7.45677	0.379175	NA	8.17883	0.315426	0.990183	15.1781	0.138569	0.89472	NA	NA	NA	NA	NA	none	none	none	none	none	none
ENSMUSG00000106164	9430085M18Rik	none	17.5688	0.1776	NA	6.99322	-1.27014	NA	NA	NA	NA	NA	NA	NA	NA	NA	NA	NA	NA	none	none	none	none	none	none
ENSMUSG00000097462	9530026P05Rik	none	NA	NA	NA	5.04757	0.430381	NA	4.5491	0.10191	0.994132	26.221	0.832696	0.0999466	NA	NA	NA	0.1426	0.8319	none	none	none	none	none	none
ENSMUSG00000097736	9530059O14Rik	none	NA	NA	NA	NA	NA	NA	NA	NA	NA	NA	NA	NA	NA	NA	NA	NA	NA	none	none	none	none	none	none
ENSMUSG00000036275	9530068E07Rik	none	422.94	-0.0689349	0.893988	414.248	0.299789	0.254403	599.736	-0.181365	0.897824	1237.15	0.521782	0.00413795	513.293	0.457729	0.22104	0.4073	9.01e-05	none	none	none	none	none	none
ENSMUSG00000036411	9530077C05Rik	none	70.935	0.10602	NA	72.754	0.0827015	0.952539	92.1211	-0.392072	0.755029	107.98	-0.193055	0.604266	7.66415	-1.0411	0.693417	-0.04358	0.8967	none	none	none	none	none	none
ENSMUSG00000044125	9530080O11Rik	none	21.7876	-0.414651	NA	31.9451	0.489755	0.633345	4.80488	0.250245	0.994132	5.95666	-0.594168	0.666192	NA	NA	NA	-0.2414	0.594	none	none	none	none	none	none
ENSMUSG00000097825	9630001P10Rik	none	NA	NA	NA	NA	NA	NA	NA	NA	NA	5.19379	-0.769873	0.583629	NA	NA	NA	NA	NA	none	none	none	none	none	none
ENSMUSG00000046138	9930021J03Rik	none	84.0977	-0.193372	NA	107.832	0.36996	0.468627	84.291	-0.32175	0.837782	132.052	-0.00220876	0.99566	33.8177	-0.727816	0.530069	-0.2168	0.08043	none	none	none	none	none	none
ENSMUSG00000044730	9930104L06Rik	none	41.7871	0.0155274	NA	36.6722	-0.16673	0.917849	22.4439	0.359218	0.9512	33.3371	0.0627334	0.937669	12.4411	1.30634	0.460433	0.1177	0.5656	none	none	none	none	none	none
ENSMUSG00000110357	A030001D20Rik	none	17.1496	-0.250211	NA	17.4773	-1.29654	0.1977	13.7965	-0.446949	0.957654	31.1388	0.199889	0.754887	NA	NA	NA	NA	NA	none	none	none	none	none	none
ENSMUSG00000079144	A130010J15Rik	none	15.1956	-0.220158	NA	17.0952	-0.470803	0.782379	8.82436	0.392482	0.977729	19.1375	0.357705	0.645428	14.4306	-1.02156	0.52598	0.3136	0.252	none	none	none	none	none	none
ENSMUSG00000087306	A230004M16Rik	none	NA	NA	NA	NA	NA	NA	4.54456	0.096829	0.994132	NA	NA	NA	NA	NA	NA	NA	NA	none	none	none	none	none	none
ENSMUSG00000068151	A230006K03Rik	none	10.2278	0.204071	NA	9.29514	-0.253815	NA	4.15159	0.21054	0.994132	12.2682	0.507221	0.596468	NA	NA	NA	NA	NA	none	none	none	none	none	none
ENSMUSG00000087178	A230056P14Rik	none	7.69017	-1.37463	NA	7.66901	0.124371	NA	10.9842	-0.254009	0.991361	23.5216	-0.812884	0.149599	NA	NA	NA	-0.3413	0.3687	none	none	none	none	none	none
ENSMUSG00000086877	A230072C01Rik	none	24.9957	-0.661063	NA	16.9204	0.372812	0.861656	16.0101	-0.743286	0.770252	31.0284	0.167966	0.813175	NA	NA	NA	-0.3168	0.1337	none	none	none	none	none	none
ENSMUSG00000055818	A230083G16Rik	none	NA	NA	NA	NA	NA	NA	5.50144	-1.88767	0.471696	NA	NA	NA	NA	NA	NA	NA	NA	none	none	none	none	none	none
ENSMUSG00000087026	A230103J11Rik	none	25.9579	-0.0208027	NA	10.1447	-0.339749	NA	11.7494	0.666733	0.89112	7.83748	0.545193	0.66277	NA	NA	NA	NA	NA	none	none	none	none	none	none
ENSMUSG00000030111	A2m	none	10.2764	3.06204	NA	20.0379	1.31224	0.143227	43.7589	1.51909	0.000591516	11125.8	2.25636	1.1141e-39	46.6621	1.19959	0.191705	5.233	6.994e-75	none	none	increasing	increasing	none	increasing
ENSMUSG00000047228	A2ml1	none	127.253	-0.251128	0.692352	110.65	-0.628165	0.180233	71.5586	-0.00310492	0.997356	46.5245	0.147878	0.815543	NA	NA	NA	NA	NA	none	none	none	none	none	none
ENSMUSG00000052479	A330008L17Rik	none	14.6606	-0.39465	NA	24.1992	0.0490293	0.983695	5.18596	-0.480566	0.979472	3.67039	0.769824	0.648316	NA	NA	NA	NA	NA	none	none	none	none	none	none
ENSMUSG00000097915	A330009N23Rik	none	27.942	-0.366834	NA	18.0169	0.521982	0.761918	NA	NA	NA	8.88624	-0.271464	0.824271	NA	NA	NA	-0.4558	0.04816	none	none	none	none	none	none
ENSMUSG00000096929	A330023F24Rik	none	NA	NA	NA	NA	NA	NA	4.33689	-0.113094	0.994132	NA	NA	NA	NA	NA	NA	-0.2104	0.1655	none	none	none	none	none	none
ENSMUSG00000087466	A330041J22Rik	none	NA	NA	NA	NA	NA	NA	NA	NA	NA	9.5014	1.14952	0.177155	NA	NA	NA	0.1918	0.716	none	none	none	none	none	none
ENSMUSG00000097868	A330069E16Rik	none	3.15957	3.28918	NA	NA	NA	NA	3.86158	0.0141345	0.997356	5.69464	0.0162804	0.991799	NA	NA	NA	0.2611	0.712	none	none	none	none	none	none
ENSMUSG00000103181	A330069K06Rik	none	NA	NA	NA	NA	NA	NA	NA	NA	NA	NA	NA	NA	NA	NA	NA	NA	NA	none	none	none	none	none	none
ENSMUSG00000097960	A330074K22Rik	none	4.3264	1.58256	NA	NA	NA	NA	33.0851	-0.567102	0.708034	11.5903	-0.348226	0.742366	NA	NA	NA	NA	NA	none	none	none	none	none	none
ENSMUSG00000109321	A330076H08Rik	none	6.17331	0.0637122	NA	NA	NA	NA	19.8668	0.51484	0.890745	4.16628	-0.248746	0.899288	NA	NA	NA	0.01205	0.9854	none	none	none	none	none	none
ENSMUSG00000086363	A330102I10Rik	none	4.4625	0.775296	NA	5.45116	0.545603	NA	3.54404	-0.976269	0.939405	NA	NA	NA	NA	NA	NA	-0.05679	0.8807	none	none	none	none	none	none
ENSMUSG00000047613	A430005L14Rik	none	40.1723	-0.494103	NA	51.216	-0.270898	0.804452	36.5326	-0.095983	0.994132	44.3171	-0.408273	0.393389	15.7388	0.190983	0.938704	-0.03502	0.9143	none	none	none	none	none	none
ENSMUSG00000056014	A430033K04Rik	none	86.8197	-0.126174	NA	135.565	0.404236	0.331941	56.2976	0.0653809	0.994132	42.9488	0.0785136	0.910294	18.65	-0.0877614	0.977981	-0.1089	0.628	none	none	none	none	none	none
ENSMUSG00000097353	A430046D13Rik	none	30.673	0.255208	NA	17.2278	-0.208345	0.9346	16.6088	0.127267	0.994132	13.315	-0.446779	0.603291	6.47112	1.1396	0.697038	NA	NA	none	none	none	none	none	none
ENSMUSG00000086851	A430108G06Rik	none	8.97359	0.359389	NA	NA	NA	NA	NA	NA	NA	NA	NA	NA	NA	NA	NA	NA	NA	none	none	none	none	none	none
ENSMUSG00000047878	A4galt	none	5.11386	0.763475	NA	NA	NA	NA	NA	NA	NA	NA	NA	NA	NA	NA	NA	-0.07173	0.8829	none	none	none	none	none	none
ENSMUSG00000097322	A530083I20Rik	none	3.23702	-0.288458	NA	NA	NA	NA	4.42902	-0.881821	0.939405	5.01287	1.14951	0.382468	NA	NA	NA	NA	NA	none	none	none	none	none	none
ENSMUSG00000048215	A630023P12Rik	none	5.30843	-0.591802	NA	NA	NA	NA	NA	NA	NA	NA	NA	NA	NA	NA	NA	NA	NA	none	none	none	none	none	none
ENSMUSG00000086725	A630052C17Rik	none	NA	NA	NA	NA	NA	NA	NA	NA	NA	4.15291	-0.25595	0.893148	NA	NA	NA	NA	NA	none	none	none	none	none	none
ENSMUSG00000101013	A630072M18Rik	none	6.39715	-0.362207	NA	7.22906	0.786626	NA	4.6959	1.02563	0.904897	12.0978	0.123068	0.921786	3.82728	-1.10541	0.769094	0.1254	0.6361	none	none	none	none	none	none
ENSMUSG00000085566	A730017L22Rik	none	20.6214	0.12416	NA	36.9104	0.46044	0.619724	10.117	0.1014	0.994132	19.3142	-0.881746	0.146943	NA	NA	NA	-0.3373	0.07729	none	none	none	none	none	none
ENSMUSG00000097924	A730020E08Rik	none	7.57358	-0.747182	NA	8.81152	-0.43141	NA	16.6563	-0.156924	0.994132	4.89079	-0.527939	0.729845	NA	NA	NA	-0.4036	0.2927	none	none	none	none	none	none
ENSMUSG00000097756	A730056A06Rik	none	5.18196	0.33678	NA	NA	NA	NA	NA	NA	NA	48.893	-0.642182	0.0975416	NA	NA	NA	-0.07843	0.8679	none	none	none	none	none	none
ENSMUSG00000092375	A730060N03Rik	none	NA	NA	NA	NA	NA	NA	14.1508	0.448295	0.953126	NA	NA	NA	NA	NA	NA	NA	NA	none	none	none	none	none	none
ENSMUSG00000112639	A730063M14Rik	none	NA	NA	NA	NA	NA	NA	NA	NA	NA	31.4601	0.867679	0.0679632	13.2494	1.3461	0.402074	NA	NA	none	none	none	none	none	none
ENSMUSG00000086693	A730081D07Rik	none	9.06071	-0.0764086	NA	7.20084	-0.361402	NA	11.4132	-0.193719	0.993949	5.90185	-0.906346	0.443006	NA	NA	NA	NA	NA	none	none	none	none	none	none
ENSMUSG00000093598	A730085K08Rik	none	NA	NA	NA	NA	NA	NA	NA	NA	NA	NA	NA	NA	NA	NA	NA	NA	NA	none	none	none	none	none	none
ENSMUSG00000053181	A830005F24Rik	none	5.74558	0.348546	NA	6.58472	0.190916	NA	9.25998	0.295516	0.991361	4.95295	0.559326	0.730231	NA	NA	NA	NA	NA	none	none	none	none	none	none
ENSMUSG00000097182	A830009L08Rik	none	15.3705	1.05302	NA	NA	NA	NA	NA	NA	NA	7.46705	-0.0120654	0.993419	NA	NA	NA	0.186	0.8857	none	none	none	none	none	none
ENSMUSG00000089957	A830011K09Rik	none	4.55982	-0.657625	NA	8.15343	1.00923	NA	NA	NA	NA	NA	NA	NA	NA	NA	NA	NA	NA	none	none	none	none	none	none
ENSMUSG00000057715	A830018L16Rik	none	790.081	-0.425819	0.0497597	609.855	-0.100721	0.845947	178.053	-0.100177	0.983338	174.298	-0.482982	0.179616	13.1681	-1.54279	0.28607	-0.4929	4.638e-06	none	none	none	none	none	none
ENSMUSG00000105923	A830019L24Rik	none	8.31181	-0.809914	NA	4.10946	-0.126968	NA	NA	NA	NA	NA	NA	NA	NA	NA	NA	NA	NA	none	none	none	none	none	none
ENSMUSG00000094707	A830019P07Rik	none	NA	NA	NA	NA	NA	NA	NA	NA	NA	37.865	-0.250264	0.659461	NA	NA	NA	NA	NA	none	none	none	none	none	none
ENSMUSG00000103695	A830029E22Rik	none	NA	NA	NA	NA	NA	NA	NA	NA	NA	NA	NA	NA	NA	NA	NA	NA	NA	none	none	none	none	none	none
ENSMUSG00000084890	A830036E02Rik	none	49.4852	0.291169	NA	14.1277	-1.0652	0.435398	NA	NA	NA	8.87429	-0.416423	0.713684	3.35828	-1.90441	0.585948	NA	NA	none	none	none	none	none	none
ENSMUSG00000097413	A830052D11Rik	none	NA	NA	NA	NA	NA	NA	NA	NA	NA	NA	NA	NA	NA	NA	NA	0.3765	0.4797	none	none	none	none	none	none
ENSMUSG00000091890	A830073O21Rik	none	10.2281	0.370956	NA	4.86684	1.07489	NA	NA	NA	NA	NA	NA	NA	NA	NA	NA	NA	NA	none	none	none	none	none	none
ENSMUSG00000087143	A830082K12Rik	none	28.5726	-0.552285	NA	18.4695	-0.521278	0.743155	17.0906	-0.202122	0.991361	71.5322	-0.256575	0.533676	4.60018	-2.57137	0.307216	-0.3257	0.1543	none	none	none	none	none	none
ENSMUSG00000074664	A830092H15Rik	none	7.90388	0.333588	NA	6.36285	-0.65043	NA	NA	NA	NA	NA	NA	NA	NA	NA	NA	NA	NA	none	none	none	none	none	none
ENSMUSG00000114961	A930002C04Rik	none	NA	NA	NA	NA	NA	NA	NA	NA	NA	NA	NA	NA	NA	NA	NA	NA	NA	none	none	none	none	none	none
ENSMUSG00000054057	A930004D18Rik	none	5.04583	0.0714387	NA	5.35217	0.465595	NA	NA	NA	NA	6.36646	0.908231	0.445474	NA	NA	NA	0.01592	0.9752	none	none	none	none	none	none
ENSMUSG00000054426	A930005H10Rik	none	20.6892	0.112096	NA	8.93488	1.07215	NA	19.2357	0.228993	0.985817	81.8416	-0.128362	0.785141	6.44971	1.46523	0.604107	-0.007257	0.9878	none	none	none	none	none	none
ENSMUSG00000097610	A930012L18Rik	none	7.36891	0.350755	NA	5.88465	-1.43218	NA	4.96918	-0.0193367	0.997323	6.26949	-0.782341	0.53003	NA	NA	NA	-0.1541	0.7293	none	none	none	none	none	none
ENSMUSG00000092368	A930015D03Rik	none	5.78493	0.173415	NA	3.83096	1.09413	NA	4.86972	-0.0343973	0.997183	8.80585	0.378912	0.755077	NA	NA	NA	-0.03141	0.9577	none	none	none	none	none	none
ENSMUSG00000060530	A930017M01Rik	none	105.457	0.278904	0.690716	84.8567	0.0519728	0.970437	114.372	-0.0118837	0.995891	66.1236	-0.418331	0.291801	5.99706	-1.28096	0.626853	0.102	0.6213	none	none	none	none	none	none
ENSMUSG00000097566	A930024N18Rik	none	5.41519	0.285619	NA	NA	NA	NA	6.10759	-0.595611	0.957669	NA	NA	NA	NA	NA	NA	NA	NA	none	none	none	none	none	none
ENSMUSG00000090622	A930033H14Rik	none	NA	NA	NA	NA	NA	NA	NA	NA	NA	NA	NA	NA	NA	NA	NA	NA	NA	none	none	none	none	none	none
ENSMUSG00000109408	A930037H05Rik	none	14.2716	-0.34816	NA	4.58634	0.268933	NA	4.93939	-0.909582	0.920035	7.83107	-0.103625	0.946077	NA	NA	NA	NA	NA	none	none	none	none	none	none
ENSMUSG00000093483	AA465934	none	NA	NA	NA	NA	NA	NA	NA	NA	NA	10.9954	0.112523	0.927438	NA	NA	NA	-0.2172	0.6522	none	none	none	none	none	none
ENSMUSG00000033213	AA467197	none	NA	NA	NA	NA	NA	NA	6.27401	1.54022	0.571242	43.3355	3.5175	1.2841e-15	NA	NA	NA	1.288	NA	none	none	none	increasing	none	none
ENSMUSG00000042510	AA986860	none	5.02599	0.569485	NA	NA	NA	NA	NA	NA	NA	7.10042	0.453636	0.718326	NA	NA	NA	0.2545	0.553	none	none	none	none	none	none
ENSMUSG00000036678	Aaas	none	61.0753	0.234886	NA	57.603	0.104718	0.942708	64.4066	0.0355765	0.994132	39.3235	0.0231491	0.977515	18.6488	0.453442	0.820006	0.1823	0.2778	none	none	none	none	none	none
ENSMUSG00000029482	Aacs	none	332.685	0.237574	0.563042	290.246	-0.160581	0.746575	79.6584	0.378397	0.768394	86.0366	-0.591324	0.0622124	27.9616	-0.259835	0.885897	-0.09688	0.6613	none	none	none	none	none	none
ENSMUSG00000037257	Aagab	none	233.409	0.109469	0.853339	278.217	-0.203651	0.598309	138.409	-0.121642	0.977337	182.729	0.191934	0.542303	182.618	-0.123497	0.888836	0.02684	0.8739	none	none	none	none	none	none
ENSMUSG00000057230	Aak1	none	3375.22	0.0126886	0.978261	2890.77	-0.033456	0.949375	2475.63	0.0407873	0.992723	778.982	-0.200762	0.359603	191.038	-0.775843	0.0719844	-0.2013	0.2514	none	none	none	none	none	none
ENSMUSG00000035642	Aamdc	none	76.679	0.0699561	NA	113.363	-0.226085	0.789096	59.7188	-0.210643	0.958938	181.723	0.144523	0.656643	28.5478	0.738962	0.545805	NA	NA	none	none	none	none	none	none
ENSMUSG00000006299	Aamp	none	665.851	0.0865186	0.829649	734.155	-0.05264	0.926634	257.472	0.165997	0.950864	456.547	0.210986	0.373973	181.848	0.168586	0.833217	0.06741	0.6702	none	none	none	none	none	none
ENSMUSG00000027628	Aar2	none	273.276	0.0418321	0.953827	309.715	0.11518	0.859414	186.511	0.303438	0.696486	109.822	-0.141214	0.740237	38.0627	-0.0239994	0.990939	NA	NA	none	none	none	none	none	none
ENSMUSG00000068522	Aard	none	7.97204	0.898408	NA	NA	NA	NA	8.04903	-0.308572	0.991361	17.0512	0.543359	0.455248	NA	NA	NA	0.6216	0.06321	none	none	none	none	none	none
ENSMUSG00000031960	Aars	none	1631.51	0.177762	0.47878	1308.7	-0.064377	0.884031	1459.42	0.237424	0.665047	407.207	-0.219757	0.4019	362.338	-0.330831	0.500616	-0.1026	0.4392	none	none	none	none	none	none
ENSMUSG00000023938	Aars2	none	75.5909	0.35428	NA	59.3918	0.156562	0.902869	42.8561	-0.202277	0.974617	25.6924	-0.511819	0.42886	7.12996	-0.558337	0.854267	-0.08606	0.6716	none	none	none	none	none	none
ENSMUSG00000075528	Aarsd1	none	NA	NA	NA	NA	NA	NA	NA	NA	NA	3.94816	-0.0273997	0.990242	NA	NA	NA	-0.1174	0.4549	none	none	none	none	none	none
ENSMUSG00000055923	Aasdh	none	29.3796	-0.193353	NA	31.1137	0.282882	0.846581	11.7987	0.570791	0.932376	26.71	-0.139495	0.856013	7.22599	0.809925	0.77687	-0.1059	0.6098	none	none	none	none	none	none
ENSMUSG00000025894	Aasdhppt	none	293.53	-0.263199	0.496927	476.651	0.0560341	0.930518	248.522	0.282173	0.738681	202.968	-0.0089285	0.98456	55.4141	0.169676	0.899728	-0.1185	0.5158	none	none	none	none	none	none
ENSMUSG00000029695	Aass	none	9.34285	0.625743	NA	4.79284	-0.212035	NA	8.22653	0.496945	0.972919	172.932	0.144281	0.705894	6.1622	-2.14637	0.313163	0.8248	0.0001038	none	none	none	none	none	none
ENSMUSG00000018697	Aatf	none	133.348	0.00732753	0.995825	143.612	-0.100456	0.927249	159.43	-0.132648	0.970586	53.6798	-0.0367909	0.958729	44.6017	-0.0567095	0.978072	-0.09474	0.7021	none	none	none	none	none	none
ENSMUSG00000025375	Aatk	none	700.469	0.288955	0.349214	554.457	-0.0765455	0.881738	355.028	0.0662059	0.991361	399.745	0.475912	0.0189751	72.3287	-1.16286	0.0463297	-0.0338	0.9005	none	none	none	none	decreasing+neuronal	none
ENSMUSG00000057880	Abat	none	602.726	0.0353876	0.948081	463.006	-0.27934	0.35335	1021.81	0.18241	0.84254	1775.75	-0.192488	0.348525	149.282	-2.4428	0.0399085	-0.06037	0.7205	none	none	none	none	decreasing+neuronal	none
ENSMUSG00000015243	Abca1	none	150.549	1.29971	7.95775e-05	206.181	0.463469	0.261104	498.219	0.338679	0.71557	10325.3	1.50397	3.36339e-22	6000.35	1.48381	1.51881e-12	2.231	2.151e-96	increasing	none	none	increasing	increasing	increasing
ENSMUSG00000035435	Abca17	none	NA	NA	NA	NA	NA	NA	NA	NA	NA	NA	NA	NA	NA	NA	NA	-0.237	0.6053	none	none	none	none	none	none
ENSMUSG00000026944	Abca2	none	1210.48	0.0591662	0.879966	862.501	-0.105101	0.802495	2073	-0.267461	0.665013	1723.89	-0.0614952	0.844502	254.78	-0.481579	0.363012	0.1221	0.5058	none	none	none	none	none	none
ENSMUSG00000024130	Abca3	none	833.711	0.0698502	0.858186	615.436	-0.152046	0.651506	820.637	-0.132041	0.956702	804.354	0.372449	0.114149	220.985	-0.052441	0.960332	-0.01299	0.9402	none	none	none	none	none	none
ENSMUSG00000018800	Abca5	none	887.389	-0.0819113	0.829649	1108.75	0.0760351	0.899293	3084.45	-0.166361	0.926348	1741.96	0.118298	0.686934	116.492	-0.194309	0.862026	0.06166	0.7454	none	none	none	none	none	none
ENSMUSG00000044749	Abca6	none	16.8679	-0.109999	NA	13.7653	-0.397157	0.862086	23.1213	0.0349903	0.995168	65.5391	0.358399	0.429062	21.9022	0.255579	0.908635	0.2064	0.5688	none	none	none	none	none	none
ENSMUSG00000035722	Abca7	none	99.7899	0.0784243	0.941395	55.9767	-0.242985	0.815085	261.599	-0.270979	0.731814	148.42	-0.434344	0.104758	98.1734	0.090526	0.936129	-0.08746	0.6763	none	none	none	none	none	none
ENSMUSG00000041828	Abca8a	none	21.4475	0.80658	NA	14.1007	-1.08623	0.35335	11.566	-0.649355	0.893498	195.836	-2.36932	0.00122265	12.3462	-0.965396	0.609354	0.01769	0.9513	none	none	none	decreasing	none	none
ENSMUSG00000020620	Abca8b	none	221.035	0.0949056	0.880154	350.101	0.264283	0.511832	196.096	-0.0537099	0.994132	307.615	0.56415	0.0281069	18.6023	-1.19984	0.354429	0.4641	0.0004998	none	none	none	none	none	none
ENSMUSG00000041797	Abca9	none	15.9347	1.34479	NA	6.09263	-0.634148	NA	10.2257	0.779337	0.86859	34.316	0.381836	0.518071	2403.82	-1.1119	1.71956e-06	1.013	1.172e-08	none	none	none	none	decreasing	increasing
ENSMUSG00000031974	Abcb10	none	34.162	-0.226053	NA	41.212	1.09173	0.0422909	32.0669	0.0717439	0.994132	65.8611	0.18841	0.696222	14.5683	0.0955286	0.978072	-0.1467	0.4208	none	increasing	none	none	none	none
ENSMUSG00000040584	Abcb1a	none	24.3056	0.0265053	NA	NA	NA	NA	15.7247	0.211617	0.991361	13.9377	0.564764	0.502429	21.4754	-2.2642	0.0192272	0.1974	0.2625	none	none	none	none	decreasing	none
ENSMUSG00000028970	Abcb1b	none	18.3645	-0.241357	NA	21.14	-0.495517	0.72453	12.8026	0.0249812	0.996968	61.2204	1.08455	0.00111645	125.413	0.808451	0.0932038	1.017	1.81e-09	none	none	none	increasing	none	increasing
ENSMUSG00000042476	Abcb4	none	21.7474	0.145287	NA	34.7313	0.0243417	0.99017	9.42826	0.890421	0.815721	67.3221	0.177528	0.73732	100.844	-1.103	0.0207128	0.1581	0.5241	none	none	none	none	decreasing	none
ENSMUSG00000026198	Abcb6	none	4.7446	0.27719	NA	4.25735	-0.549327	NA	4.49078	0.33064	0.992723	4.31089	0.32851	0.859243	NA	NA	NA	-0.2326	0.1324	none	none	none	none	none	none
ENSMUSG00000031333	Abcb7	none	394.125	-0.417383	0.234607	581.576	-0.208658	0.550939	538.984	-0.0520883	0.992897	399.095	-0.528025	0.00270417	165.855	-0.0857303	0.927126	-0.367	0.002835	none	none	none	none	none	none
ENSMUSG00000028973	Abcb8	none	123.656	0.2494	0.696212	122.502	-0.094576	0.924479	80.6931	0.218998	0.943961	166.121	0.139709	0.667819	21.332	0.0695897	0.979819	0.04618	0.8202	none	none	none	none	none	none
ENSMUSG00000029408	Abcb9	none	168.963	0.0230389	0.980716	64.281	-0.382117	0.580886	141.979	0.0771231	0.992723	138.694	-1.02069	0.000236269	16.8982	-1.75925	0.175299	-0.5084	0.01704	none	none	none	decreasing	none	none
ENSMUSG00000023088	Abcc1	none	102.677	0.00294562	0.999806	113.787	-0.205113	0.759062	93.1157	-0.503055	0.544808	253.218	0.189006	0.571776	181.106	0.0632695	0.948837	0.09558	0.5632	none	none	none	none	none	none
ENSMUSG00000032842	Abcc10	none	14.1839	0.243047	NA	9.53249	-0.707312	NA	13.0953	-0.28011	0.982927	24.1972	-0.375483	0.598022	NA	NA	NA	0.2683	0.1192	none	none	none	none	none	none
ENSMUSG00000020865	Abcc3	none	5.24024	1.37994	NA	NA	NA	NA	NA	NA	NA	4.72865	3.04682	0.0364892	1338.67	-0.261262	0.518157	1.633	1.827e-19	none	none	none	increasing	none	increasing
ENSMUSG00000032849	Abcc4	none	16.7604	-0.57762	NA	14.9455	0.981767	0.472335	22.6332	0.00712832	0.997323	252.695	0.678538	0.00290891	47.075	-0.52787	0.60666	0.5203	0.0007864	none	none	none	none	none	none
ENSMUSG00000022822	Abcc5	none	721.184	-0.058635	0.900464	661.095	-0.188524	0.58586	514.23	-0.00570348	0.997183	292.754	-0.0203516	0.96592	105.097	-0.200914	0.852289	-0.2555	0.05224	none	none	none	none	none	none
ENSMUSG00000040136	Abcc8	none	290.801	-0.244013	0.551207	246.292	-0.326642	0.373347	357.472	-0.440358	0.3164	74.2528	-0.823847	0.0382057	13.1349	-1.84873	0.180144	-0.566	1.193e-05	none	none	none	none	none	none
ENSMUSG00000030249	Abcc9	none	8.22523	0.111526	NA	NA	NA	NA	10.2943	0.290856	0.988891	8.60029	-0.679632	0.544368	14.1139	-0.715406	0.720146	-0.5322	0.006572	none	none	none	none	none	none
ENSMUSG00000031378	Abcd1	none	21.4075	0.0732252	NA	18.9829	0.16863	0.948636	8.5009	0.0987494	0.994132	61.6266	-0.181861	0.707786	98.5722	-0.100338	0.928557	0.279	0.05822	none	none	none	none	none	none
ENSMUSG00000055782	Abcd2	none	468.471	-0.250798	0.43019	188.841	-0.0418168	0.971648	459.413	-0.0686255	0.990737	971.271	0.0846244	0.769306	323.952	0.750743	0.045898	0.4649	0.0004687	none	none	none	none	none	none
ENSMUSG00000028127	Abcd3	none	459.458	-0.413335	0.118912	708.046	0.0410517	0.957166	713.71	-0.0571418	0.991361	1576.74	-0.219522	0.507768	227.645	-0.186493	0.799411	0.1763	0.1407	none	none	none	none	none	none
ENSMUSG00000021240	Abcd4	none	24.5575	0.104907	NA	21.2704	0.34408	0.848676	24.6237	0.116664	0.994132	173.857	-0.0592477	0.901166	19.739	-0.181608	0.93488	0.1041	0.5733	none	none	none	none	none	none
ENSMUSG00000058355	Abce1	none	845.299	-0.22423	0.469317	1201.32	0.0900559	0.806321	643.388	0.0955664	0.973802	408.128	-0.0806262	0.786549	212.575	-0.0122844	0.991725	-0.1834	0.1374	none	none	none	none	none	none
ENSMUSG00000038762	Abcf1	none	452.791	-0.111654	0.79921	366.808	-0.26304	0.342282	184.94	-0.226558	0.924885	103.251	-0.523438	0.0691011	95.0152	-0.334743	0.680883	-0.1468	0.252	none	none	none	none	none	none
ENSMUSG00000028953	Abcf2	none	813.264	-0.166346	0.586154	804.725	-0.194769	0.480501	374.131	0.185349	0.867084	154.159	-0.51819	0.0526303	89.8657	-0.150841	0.888741	-0.2186	0.03597	none	none	none	none	none	none
ENSMUSG00000003234	Abcf3	none	404.499	0.115244	0.79312	347.234	-0.0634094	0.926634	263.186	0.0199152	0.994132	125.869	-0.384334	0.177468	65.3017	0.0238798	0.988181	-0.1126	0.3984	none	none	none	none	none	none
ENSMUSG00000024030	Abcg1	none	650.941	0.235475	0.43387	628.147	0.11485	0.774499	677.365	-0.00688583	0.996155	166.598	0.851329	0.000295918	489.713	1.20682	3.4264e-05	0.3332	0.0006001	none	none	none	none	increasing	none
ENSMUSG00000029802	Abcg2	none	87.6934	0.0580722	NA	96.7546	0.530818	0.208554	26.7787	0.619132	0.719127	52.0811	0.20798	0.699066	98.8725	0.565062	0.480899	0.1691	0.4217	none	none	none	none	none	none
ENSMUSG00000032131	Abcg4	none	333.966	0.0860768	0.869864	328.96	-0.150063	0.783091	323.879	0.226518	0.826356	103.048	-0.0851287	0.844527	12.7024	-2.52195	0.0434334	-0.2987	0.01328	none	none	none	none	decreasing+neuronal	none
ENSMUSG00000006638	Abhd1	none	NA	NA	NA	NA	NA	NA	NA	NA	NA	12.5139	0.554283	0.540871	NA	NA	NA	-0.186	0.6032	none	none	none	none	none	none
ENSMUSG00000033157	Abhd10	none	105.708	-0.231232	0.751525	94.4126	-0.115974	0.913242	122.163	0.185979	0.950864	112.008	0.317361	0.348796	17.3834	0.64816	0.708494	-0.01777	0.9471	none	none	none	none	none	none
ENSMUSG00000040532	Abhd11	none	97.3293	0.262349	0.717984	54.9024	-0.410237	0.601249	36.5554	0.00462045	0.997356	106.126	0.285697	0.418512	13.6544	-0.809462	0.66206	0.3263	0.02418	none	none	none	none	none	none
ENSMUSG00000085042	Abhd11os	none	NA	NA	NA	NA	NA	NA	NA	NA	NA	32.6559	2.09915	2.04493e-06	NA	NA	NA	NA	NA	none	none	none	increasing	none	none
ENSMUSG00000032046	Abhd12	none	2472.55	-0.0287241	0.947181	2417.17	-0.0827018	0.825035	1674.71	-0.132698	0.915778	2042.82	-0.0770142	0.767896	3415.82	0.897154	9.26802e-05	0.04623	0.7928	none	none	none	none	none	none
ENSMUSG00000040396	Abhd13	none	141.366	0.00914157	0.994397	171.186	0.22789	0.694098	137.607	-0.032522	0.994132	133.536	0.0222051	0.966954	45.842	-0.195743	0.889864	-0.1437	0.356	none	none	none	none	none	none
ENSMUSG00000042210	Abhd14a	none	53.7427	-0.13878	NA	45.3044	-0.0993087	0.953535	25.7544	-0.24692	0.976414	100.331	-0.157501	0.740037	9.40816	-0.787066	0.750281	-0.1957	0.2041	none	none	none	none	none	none
ENSMUSG00000042073	Abhd14b	none	14.4372	0.887418	NA	8.49124	-0.475411	NA	12.7591	0.398819	0.96433	40.7423	0.171233	0.77208	13.1326	-0.706832	0.724646	0.1386	0.4274	none	none	none	none	none	none
ENSMUSG00000007036	Abhd16a	none	421.715	0.167612	0.6754	295.515	-0.0586499	0.935363	341.355	-0.0440192	0.994132	343.266	-0.013858	0.974072	59.1336	0.100639	0.942858	0.1023	0.5376	none	none	none	none	none	none
ENSMUSG00000003346	Abhd17a	none	146.561	0.790542	0.0480439	102.791	-0.0102354	0.99277	65.4667	-0.204321	0.958839	60.1612	0.0624026	0.913895	20.2637	-0.56075	0.738719	NA	NA	none	none	none	none	none	none
ENSMUSG00000047368	Abhd17b	none	232.911	-0.100722	0.86633	319.017	0.0290522	0.972254	188.849	-0.198521	0.904561	207.38	-0.217583	0.447502	50.7235	-0.0183177	0.991725	NA	NA	none	none	none	none	none	none
ENSMUSG00000038459	Abhd17c	none	49.4074	0.20405	NA	135.115	0.217468	0.757972	23.2533	0.195683	0.989253	48.4465	-0.319437	0.486011	63.1618	1.61245	0.00472693	NA	NA	none	none	none	none	increasing	none
ENSMUSG00000037818	Abhd18	none	37.6254	-0.39673	NA	47.8877	-0.0420497	0.980844	26.1998	-0.190729	0.989193	32.4764	-0.783876	0.0924965	7.68712	0.665724	0.820512	NA	NA	none	none	none	none	none	none
ENSMUSG00000039202	Abhd2	none	954.156	-0.0663533	0.86367	631.825	0.366503	0.03605	241.039	-0.0156628	0.994789	1264.63	0.953571	5.97019e-07	182.767	-0.101474	0.909126	0.07878	0.6019	none	none	none	none	none	none
ENSMUSG00000002475	Abhd3	none	96.0521	0.110743	0.91633	63.3409	-0.12391	0.927376	533.447	-0.397436	0.172925	2417.73	-0.397776	0.0992245	50.7378	-1.05761	0.198959	0.1666	0.1985	none	none	none	none	none	none
ENSMUSG00000040997	Abhd4	none	74.5088	0.822639	NA	53.4217	0.300753	0.751809	37.34	0.787198	0.485157	2041.18	1.24767	3.90472e-18	166.781	0.796841	0.0830313	1.225	1.015e-34	none	none	none	increasing	none	increasing
ENSMUSG00000032540	Abhd5	none	31.6747	0.290867	NA	19.7825	0.193014	0.942708	12.2039	-0.350078	0.977337	108.541	0.162806	0.681782	44.3158	1.22055	0.103018	0.2009	0.2396	none	none	none	none	none	none
ENSMUSG00000025277	Abhd6	none	336.548	-0.0568994	0.930495	413.778	-0.111422	0.855779	301.607	-0.00547865	0.997323	380.685	-0.491565	0.0584635	102.559	-0.342314	0.66437	-0.4095	0.0004053	none	none	none	none	none	none
ENSMUSG00000007950	Abhd8	none	543.444	0.326969	0.281544	333.927	-0.368825	0.154239	243.934	-0.0642646	0.992723	197.436	-0.178377	0.54413	19.0893	-0.858934	0.550259	-0.2779	0.1975	none	none	none	none	none	none
ENSMUSG00000058835	Abi1	none	879.327	-0.222007	0.39443	1762.6	0.277846	0.142564	286.294	0.080777	0.983338	777.281	-0.200573	0.413779	419.152	0.32428	0.586998	0.01187	0.9518	none	none	none	none	none	none
ENSMUSG00000026782	Abi2	none	1197.32	-0.228018	0.371611	1440.09	-0.016945	0.9775	303.163	-0.0184555	0.994132	666.762	-0.11734	0.647382	77.6859	-0.0889012	0.948986	-0.2753	0.02438	none	none	none	none	none	none
ENSMUSG00000035258	Abi3bp	none	181.103	-0.308069	0.854638	11.5145	-0.470081	NA	9.97686	-0.248777	0.991361	498.637	-1.13109	2.62869e-07	10.3276	1.04133	0.619644	0.2775	0.5322	none	none	none	decreasing	none	none
ENSMUSG00000038827	Abitram	none	93.6824	-0.391372	NA	86.3259	-0.0436243	0.974113	50.1803	0.224374	0.965574	82.1123	-0.179813	0.709474	31.2107	0.449606	0.751484	NA	NA	none	none	none	none	none	none
ENSMUSG00000026842	Abl1	none	76.9116	0.254743	NA	61.1279	0.134136	0.924479	32.4811	0.187644	0.982295	76.866	0.304214	0.425749	143.426	-0.74672	0.136374	0.2361	0.02991	none	none	none	none	none	none
ENSMUSG00000026596	Abl2	none	230.202	0.479944	0.166199	304.35	0.236485	0.482736	61.7479	0.199091	0.958938	145.63	-0.128232	0.726572	66.3167	0.980915	0.137009	-0.228	0.04718	none	none	none	none	none	none
ENSMUSG00000025085	Ablim1	none	595.82	-0.412724	0.139351	231.217	0.220802	0.680475	586.226	-0.140495	0.939405	224.861	-0.491658	0.0352276	37.8943	-0.618282	0.562392	-0.246	0.05167	none	none	none	none	none	none
ENSMUSG00000029095	Ablim2	none	504.047	-0.0600879	0.907232	355.365	-0.18627	0.632571	296.393	-0.14478	0.956332	134.002	0.118931	0.763101	16.4898	-2.04	0.0775731	-0.07442	0.5982	none	none	none	none	none	none
ENSMUSG00000032735	Ablim3	none	59.9653	0.147544	NA	69.6906	0.355077	0.619781	53.8178	-0.116322	0.991399	17.9829	-0.672843	0.334683	NA	NA	NA	-0.1093	0.6043	none	none	none	none	none	none
ENSMUSG00000017631	Abr	none	3266.75	0.0095602	0.9845	3890.39	0.218568	0.267019	919.51	0.122964	0.957654	1742.91	-0.400994	0.0363944	276.366	-0.14554	0.848129	-0.1582	0.4229	none	none	none	none	none	none
ENSMUSG00000042895	Abra	none	NA	NA	NA	NA	NA	NA	NA	NA	NA	NA	NA	NA	NA	NA	NA	NA	NA	none	none	none	none	none	none
ENSMUSG00000078453	Abracl	none	54.7943	-0.0202495	NA	178.411	0.121729	0.875807	23.7096	-0.144789	0.992723	28.426	0.955125	0.0453758	91.8926	0.949174	0.101091	NA	NA	none	none	none	none	none	none
ENSMUSG00000035234	Abraxas1	none	27.7473	-0.0638748	NA	35.2077	0.302035	0.82904	23.9795	-0.0494657	0.994132	26.6289	0.494016	0.41984	12.3126	0.362555	0.904551	NA	NA	none	none	none	none	none	none
ENSMUSG00000030965	Abraxas2	none	161.963	0.253799	0.659572	165.464	0.135887	0.864885	116.968	0.00818342	0.997183	87.1125	-0.138286	0.753441	103.361	0.125361	0.907029	NA	NA	none	none	none	none	none	none
ENSMUSG00000036376	Abt1	none	90.4959	-0.0904051	NA	73.3441	-0.331187	0.638753	51.7578	-0.365517	0.845848	35.0014	-0.270113	0.646704	18.3714	0.586911	0.751957	-0.1727	0.4587	none	none	none	none	none	none
ENSMUSG00000030083	Abtb1	none	74.1319	0.593738	NA	35.8031	-0.242736	0.866811	34.9822	0.193545	0.983338	13.9221	-0.252709	0.794774	23.076	-0.608295	0.689654	-0.004776	0.9865	none	none	none	none	none	none
ENSMUSG00000032724	Abtb2	none	7.58316	0.881354	NA	NA	NA	NA	18.4634	0.0683656	0.994132	50.7687	-0.175858	0.74043	NA	NA	NA	0.5721	0.0003165	none	none	none	none	none	none
ENSMUSG00000036138	Acaa1a	none	137.617	-0.01551	0.989424	131.26	0.14837	0.862527	43.6311	0.495745	0.771034	132.71	0.0457023	0.92053	60.6079	0.225331	0.846331	0.1652	0.2831	none	none	none	none	none	none
ENSMUSG00000036880	Acaa2	none	22.8278	0.086546	NA	15.5536	-0.306339	0.902338	14.8803	0.309415	0.979195	406.785	-0.538449	0.00900196	56.4604	0.483565	0.605864	0.1834	0.503	none	none	none	none	none	none
ENSMUSG00000020532	Acaca	none	196.076	-0.156331	0.781159	150.784	-0.0469025	0.96757	103.553	0.191409	0.948922	217.363	-0.235258	0.450963	57.6658	2.43114	0.000125556	-0.09952	0.4745	none	none	none	none	increasing	none
ENSMUSG00000042010	Acacb	none	NA	NA	NA	NA	NA	NA	NA	NA	NA	35.4963	-0.935965	0.0264704	NA	NA	NA	0.5161	0.03907	none	none	none	none	none	none
ENSMUSG00000090150	Acad11	none	155.692	0.12813	0.855344	166.669	0.230078	0.661587	99.2416	0.142083	0.977729	210.59	-0.674266	0.000992143	26.5882	-0.443253	0.766892	0.1813	0.2467	none	none	none	none	none	none
ENSMUSG00000042647	Acad12	none	5.80457	0.574224	NA	4.79722	0.771167	NA	NA	NA	NA	16.9387	-0.481344	0.515699	5.65835	1.01774	0.747606	0.6289	0.04728	none	none	none	none	none	none
ENSMUSG00000031969	Acad8	none	76.5331	0.333402	NA	101.57	0.0642104	0.958548	69.9158	-0.0139006	0.995591	127.766	-0.0328029	0.946993	29.9964	0.213705	0.90511	0.003811	0.9887	none	none	none	none	none	none
ENSMUSG00000027710	Acad9	none	272.468	-0.07861	0.904883	261.862	-0.151794	0.759062	221.215	0.0614498	0.992723	208.568	-0.220868	0.475238	56.6196	-0.703452	0.389573	-0.1365	0.3431	none	none	none	none	none	none
ENSMUSG00000026003	Acadl	none	51.7911	-0.0855108	NA	28.5417	-0.292322	0.880744	112.705	0.517338	0.349485	727.815	-0.333242	0.0863774	127.477	0.834534	0.100455	0.1815	0.213	none	none	none	none	none	none
ENSMUSG00000062908	Acadm	none	108.995	-0.355768	0.59084	105.575	-0.12796	0.891674	71.7138	0.0698701	0.994132	400.16	-0.206414	0.429062	115.392	0.115065	0.911306	0.1464	0.3208	none	none	none	none	none	none
ENSMUSG00000029545	Acads	none	7.94316	0.937034	NA	NA	NA	NA	4.55583	-0.569832	0.977729	79.7125	-0.0511946	0.926615	86.5271	-0.194461	0.848171	0.7981	3.349e-05	none	none	none	none	none	none
ENSMUSG00000030861	Acadsb	none	311.032	0.00693274	0.994151	499.514	-0.0711612	0.904974	308.06	-0.0768145	0.989253	816.439	-0.0662958	0.804261	164.954	0.174846	0.827172	0.1856	0.1416	none	none	none	none	none	none
ENSMUSG00000018574	Acadvl	none	142.322	0.288287	0.61832	126.859	0.296983	0.572658	131.754	0.406796	0.576109	377.766	0.127785	0.672978	100.263	-0.0373283	0.979787	0.2879	0.01225	none	none	none	none	none	none
ENSMUSG00000030607	Acan	none	13.1056	0.246681	NA	26.0293	1.31642	0.0406121	648.27	-0.496714	0.37592	34.7742	1.89082	2.8195e-06	9.72494	-0.36902	0.90511	-0.4767	0.1421	none	increasing	none	increasing	none	none
ENSMUSG00000049076	Acap2	none	588.894	0.119261	0.758895	1065.02	0.421213	0.00527592	131.171	-0.11185	0.983338	434.561	-0.393213	0.0644704	330.525	-0.259189	0.661272	0.1435	0.3269	none	none	none	none	none	none
ENSMUSG00000029033	Acap3	none	771.562	0.319282	0.23744	656.951	0.398857	0.0569358	122.363	0.236907	0.935569	161.865	0.540983	0.0531886	20.2031	-1.91314	0.0753634	0.1185	0.3931	none	none	none	none	none	none
ENSMUSG00000032047	Acat1	none	880.771	-0.113837	0.746834	1056.98	0.10366	0.828962	805.94	0.173413	0.86867	804.2	-0.273729	0.218256	202.585	-0.548586	0.224906	-0.08599	0.5231	none	none	none	none	none	none
ENSMUSG00000023832	Acat2	none	102.373	0.0150705	0.99082	59.5929	0.136962	0.917849	57.7704	0.152936	0.984714	57.8654	-0.430416	0.277178	13.0455	-0.263713	0.918751	-0.3501	0.01993	none	none	none	none	none	none
ENSMUSG00000026499	Acbd3	none	283.652	-0.0752554	0.900583	236.532	-0.0384768	0.96924	244.453	-0.136695	0.956332	208.128	-0.571575	0.0120068	178.904	0.343653	0.579976	0.01663	0.9471	none	none	none	none	none	none
ENSMUSG00000056938	Acbd4	none	66.0995	-0.354583	NA	55.5041	-0.00716103	0.995168	74.4929	0.233569	0.939405	53.8187	0.176538	0.732605	4.72146	0.182188	0.97384	0.02872	0.905	none	none	none	none	none	none
ENSMUSG00000026781	Acbd5	none	167.483	0.0236965	0.979677	184.21	0.174156	0.782735	198.445	-0.0159342	0.994877	639.248	0.0720406	0.822448	169.069	0.508016	0.321606	0.06423	0.6463	none	none	none	none	none	none
ENSMUSG00000033701	Acbd6	none	376.319	0.136205	0.762387	299.033	0.204918	0.661587	252.774	-0.000212137	0.999463	167.639	0.121078	0.745989	52.6489	0.520764	0.585826	-0.006845	0.9795	none	none	none	none	none	none
ENSMUSG00000040272	Accs	none	5.73657	0.7287	NA	NA	NA	NA	13.5912	0.378702	0.962425	16.3165	1.10095	0.085204	27.5132	-0.152957	0.93453	0.8896	0.0006614	none	none	none	none	none	none
ENSMUSG00000038000	Acd	none	103.16	0.267543	0.703118	71.6139	-0.109058	0.935363	55.445	-0.0154658	0.995591	55.3525	0.152776	0.770608	18.355	0.285002	0.898835	-0.1597	0.3072	none	none	none	none	none	none
ENSMUSG00000020681	Ace	none	136.404	0.087064	0.918812	57.7167	-0.392513	0.597134	159.767	-0.498402	0.4354	301.648	-0.284936	0.265484	31.7237	-0.591491	0.638732	0.3591	0.6809	none	none	none	none	none	none
ENSMUSG00000038007	Acer2	none	10.2275	-0.823702	NA	NA	NA	NA	NA	NA	NA	4.69822	1.24823	0.34547	NA	NA	NA	0.1227	0.7422	none	none	none	none	none	none
ENSMUSG00000030760	Acer3	none	80.1775	-0.661824	NA	121.493	-0.182304	0.799531	165.825	-0.106731	0.989253	264.275	-0.0990406	0.775643	368.025	0.686162	0.0559354	0.7958	7.632e-08	none	none	none	none	none	none
ENSMUSG00000023328	Ache	none	263.2	0.0181207	0.982509	228.622	0.294655	0.567418	488.218	0.00162111	0.997358	295.613	-0.0100086	0.982516	47.3373	-0.612023	0.547275	0.1645	0.3955	none	none	none	none	none	none
ENSMUSG00000022185	Acin1	none	566.144	0.197095	0.602476	450.501	-0.22149	0.591745	510.734	-0.140082	0.94237	316.306	-0.871811	7.79269e-07	288.901	-0.317461	0.565585	-0.08174	0.5933	none	none	none	none	none	none
ENSMUSG00000044534	Ackr2	none	9.16848	0.707729	NA	NA	NA	NA	NA	NA	NA	NA	NA	NA	NA	NA	NA	NA	NA	none	none	none	none	none	none
ENSMUSG00000044337	Ackr3	none	47.3077	0.0829653	NA	85.9969	0.766798	0.06415	22.9062	0.23782	0.979024	169.879	0.344393	0.235138	10.1322	-0.741181	0.761417	NA	NA	none	none	none	none	none	none
ENSMUSG00000020917	Acly	none	1249.37	-0.000543433	0.999806	941.188	-0.0615874	0.899293	970.869	0.295617	0.502369	358.823	-0.663892	0.000254465	456.077	-0.152351	0.802288	-0.1928	0.09027	none	none	none	none	none	none
ENSMUSG00000028405	Aco1	none	179.471	-0.0988506	0.885307	194.359	0.0637627	0.942708	119.117	-0.154898	0.962425	207.065	-0.355181	0.178188	92.5793	0.101391	0.931166	0.09481	0.55	none	none	none	none	none	none
ENSMUSG00000022477	Aco2	none	2391.71	0.0798426	0.82479	2763.58	-0.0301652	0.953535	2348.83	0.233728	0.663493	1421.06	-0.308757	0.0772671	312.563	-0.688683	0.130842	-0.2424	0.1134	none	none	none	none	none	none
ENSMUSG00000072949	Acot1	none	14.9334	0.318462	NA	25.4805	0.565145	0.626114	4.09252	0.948112	0.926348	37.722	-0.550137	0.277884	NA	NA	NA	0.3206	0.2522	none	none	none	none	none	none
ENSMUSG00000047565	Acot10	none	5.5707	0.262852	NA	NA	NA	NA	NA	NA	NA	NA	NA	NA	NA	NA	NA	NA	NA	none	none	none	none	none	none
ENSMUSG00000034853	Acot11	none	27.076	0.919643	NA	6.15367	1.01898	NA	8.12032	0.630793	0.940643	695.575	-0.722961	8.20689e-06	8.05224	-0.673983	0.812152	0.3635	0.002487	none	none	none	none	none	none
ENSMUSG00000006717	Acot13	none	741.665	-0.0472769	0.918333	1334.3	0.243179	0.318241	654.003	0.0630427	0.98964	697.92	-0.0184543	0.961027	185.127	0.538709	0.295212	-0.1188	0.4572	none	none	none	none	none	none
ENSMUSG00000021226	Acot2	none	16.2944	0.522754	NA	33.9986	-0.0728605	0.975145	NA	NA	NA	23.7114	0.292465	0.681402	11.9138	-0.410608	0.867733	0.1226	0.7106	none	none	none	none	none	none
ENSMUSG00000021228	Acot3	none	NA	NA	NA	8.85263	0.267754	NA	NA	NA	NA	NA	NA	NA	NA	NA	NA	-0.08664	0.8584	none	none	none	none	none	none
ENSMUSG00000052392	Acot4	none	6.49428	0.0580774	NA	10.2186	0.700829	NA	NA	NA	NA	NA	NA	NA	NA	NA	NA	0.4272	0.2602	none	none	none	none	none	none
ENSMUSG00000042540	Acot5	none	12.5806	0.10193	NA	29.1577	0.114619	0.956775	NA	NA	NA	NA	NA	NA	NA	NA	NA	-0.07031	0.8783	none	none	none	none	none	none
ENSMUSG00000043487	Acot6	none	25.5693	-0.274844	NA	55.4776	-0.081467	0.959036	21.1426	0.131992	0.994132	34.0178	-0.918341	0.040468	7.28495	0.269582	0.939896	-0.09447	0.834	none	none	none	none	none	none
ENSMUSG00000028937	Acot7	none	2518.78	0.0101951	0.982756	2319.11	-0.356991	0.0313513	2037.07	0.0427969	0.994132	398.544	-0.24374	0.389942	90.2965	-1.27052	0.0326686	-0.4658	0.0005937	none	none	none	none	decreasing+neuronal	none
ENSMUSG00000017307	Acot8	none	38.3637	0.235196	NA	31.138	-0.158149	0.932164	23.3598	0.0292658	0.995591	31.2191	0.105188	0.888178	12.0418	-0.54689	0.815258	0.07174	0.8412	none	none	none	none	none	none
ENSMUSG00000025287	Acot9	none	145.762	-0.0309277	0.97525	132.867	-0.238967	0.683845	61.9661	0.572561	0.4674	34.5486	0.275399	0.629931	47.4135	1.57888	0.0186875	-0.04542	0.8544	none	none	none	none	increasing	none
ENSMUSG00000020777	Acox1	none	1279.56	0.138521	0.64442	1437.92	0.0847	0.834552	650.763	0.0970261	0.962425	2253.73	0.478153	0.00202831	222.175	-0.347716	0.530645	0.3239	0.006219	none	none	none	none	none	none
ENSMUSG00000029098	Acox3	none	149.234	0.548879	0.192262	116.252	0.239283	0.696709	204.377	0.263155	0.750534	168.617	0.68763	0.00290353	360.572	0.629022	0.113217	0.7053	9.825e-12	none	none	none	none	none	none
ENSMUSG00000044573	Acp1	none	28.9413	-0.351973	NA	46.6857	-0.126248	0.943861	27.0994	-0.346579	0.957654	46.9781	-0.0371089	0.95909	5.9751	0.938929	0.78824	-0.03872	0.8248	none	none	none	none	none	none
ENSMUSG00000002103	Acp2	none	527.699	0.064959	0.90307	539.93	-0.2371	0.37992	523.946	-0.199064	0.846891	1160.58	-0.0967254	0.72899	842.156	0.533572	0.0905532	0.1467	0.1859	none	none	none	none	none	none
ENSMUSG00000028093	Acp6	none	38.2465	-0.0745949	NA	52.6218	0.0201452	0.990159	22.7617	-0.190948	0.991361	30.5849	0.282065	0.641408	19.1864	0.398974	0.834483	-0.08992	0.6899	none	none	none	none	none	none
ENSMUSG00000037469	Acp7	none	8.2058	-0.764619	NA	11.6453	0.849664	NA	NA	NA	NA	6.075	-0.488921	0.720025	NA	NA	NA	NA	NA	none	none	none	none	none	none
ENSMUSG00000032281	Acsbg1	none	171.472	0.532747	0.211355	33.0987	0.162073	0.945399	60.5013	0.615748	0.616875	4285.55	-0.17478	0.483303	57.9544	-1.14314	0.157996	0.6835	1.829e-10	none	none	none	none	none	none
ENSMUSG00000015016	Acsf3	none	76.1648	0.0392563	NA	52.1266	0.0176792	0.991618	61.6999	0.197213	0.971512	59.9609	0.22974	0.640931	15.4557	-0.0791351	0.980807	0.06052	0.78	none	none	none	none	none	none
ENSMUSG00000018796	Acsl1	none	383.576	0.043506	0.942269	357.349	0.128987	0.795525	147.966	0.235402	0.892104	80.5501	0.447588	0.181796	89.1351	-0.0167655	0.990939	-0.1214	0.3843	none	none	none	none	none	none
ENSMUSG00000032883	Acsl3	none	1013.51	-0.36429	0.10988	1118.62	0.0673271	0.898155	757.099	0.0212656	0.994132	7096.05	-0.058762	0.868732	94.3574	-1.29359	0.0157397	0.1234	0.4834	none	none	none	none	decreasing+neuronal	none
ENSMUSG00000031278	Acsl4	none	1678.02	-0.0568791	0.878188	2082.23	0.0195926	0.977046	808.61	-0.076816	0.986324	610.182	-0.273361	0.346086	382.457	0.216641	0.706509	-0.1908	0.1385	none	none	none	none	none	none
ENSMUSG00000024981	Acsl5	none	474.359	-0.140763	0.722505	355.883	0.0213624	0.980035	79.2593	0.0811041	0.994132	136.284	0.391094	0.177939	175.464	0.334253	0.591044	-0.1069	0.4246	none	none	none	none	none	none
ENSMUSG00000020333	Acsl6	none	865.517	-0.0144377	0.979144	718.076	0.101463	0.81909	1618.94	0.129297	0.908037	4536.64	-0.755656	1.08524e-05	110.146	-1.99628	1.22534e-05	-0.07724	0.6082	none	none	none	none	decreasing+neuronal	none
ENSMUSG00000027452	Acss1	none	17.383	0.364571	NA	18.6157	0.131065	0.959607	6.41615	0.107803	0.994132	201.344	-0.76298	0.000362488	78.7806	-0.101241	0.93453	0.1882	0.1958	none	none	none	none	none	none
ENSMUSG00000027605	Acss2	none	236.122	0.00327842	0.998295	230.255	-0.294615	0.384226	250.132	0.0537787	0.994132	201.609	-1.17228	1.06222e-09	21.9725	-1.03629	0.483192	-0.4923	1.767e-05	none	none	none	decreasing	none	none
ENSMUSG00000031972	Acta1	none	73.7016	-0.151016	NA	46.3295	-0.110334	0.946536	17.5258	0.443922	0.9512	14.4767	0.334986	0.713684	NA	NA	NA	-0.2922	0.3319	none	none	none	none	none	none
ENSMUSG00000035783	Acta2	none	14.1556	0.667873	NA	4.4724	-0.160166	NA	10.939	1.19219	0.524541	17.4157	-0.717651	0.295183	7.14904	0.209022	0.958288	-0.5795	0.001182	none	none	none	none	none	none
ENSMUSG00000029580	Actb	none	13293.7	0.413923	0.00412309	19124	0.119295	0.68999	4741.54	0.357065	0.316154	7958.21	0.595906	0.0002034	13466.3	0.0341652	0.97034	0.1511	0.4905	none	none	none	none	none	none
ENSMUSG00000027671	Actl6a	none	47.823	-0.0959667	NA	73.0838	0.42223	0.492469	44.0073	0.0555028	0.994132	66.9367	0.55102	0.10524	57.4118	-0.250029	0.847206	0.3851	0.02899	none	none	none	none	none	none
ENSMUSG00000029712	Actl6b	none	490.871	0.0492733	0.92683	590.648	-0.15784	0.666606	134.143	0.107843	0.981275	75.3982	0.0224734	0.971511	13.5662	-1.88358	0.161498	-0.4564	1.924e-06	none	none	none	none	none	none
ENSMUSG00000015143	Actn1	none	592.796	-0.0716957	0.8806	787.146	0.0584292	0.928947	66.5025	-0.141427	0.985423	134.435	0.19648	0.621382	67.9184	-0.955038	0.149145	0.1231	0.3435	none	none	none	none	none	none
ENSMUSG00000052374	Actn2	none	65.558	-0.2264	NA	90.2042	-0.16649	0.879679	9.54468	0.0334358	0.995891	8.39684	0.154184	0.911898	5.10063	-3.40032	0.153475	-0.3234	0.1067	none	none	none	none	none	none
ENSMUSG00000006457	Actn3	none	6.40654	0.0295858	NA	NA	NA	NA	4.27801	-0.22445	0.994132	NA	NA	NA	NA	NA	NA	0.4962	0.2882	none	none	none	none	none	none
ENSMUSG00000054808	Actn4	none	486.55	-0.0684722	0.900306	423.221	0.0556871	0.935363	116.153	0.0928415	0.991361	210.348	0.396277	0.126676	179.882	0.498099	0.337772	0.04726	0.7574	none	none	none	none	none	none
ENSMUSG00000021076	Actr10	none	1432.25	-0.165088	0.546662	1618.67	0.10489	0.813064	868.264	0.216259	0.703411	687.921	0.276244	0.212935	170.566	-0.176835	0.829396	-0.2279	0.02793	none	none	none	none	none	none
ENSMUSG00000025228	Actr1a	none	1321.75	0.179642	0.494568	1360.97	-0.153136	0.552933	674.011	0.20625	0.759885	642.193	0.188372	0.407631	214.866	0.0180903	0.987513	-0.1831	0.1344	none	none	none	none	none	none
ENSMUSG00000037351	Actr1b	none	1752.07	0.135284	0.613806	1183.29	0.0728724	0.872589	638.492	0.216589	0.795283	488.518	0.49919	0.00623262	155.366	-0.2541	0.721374	-0.07009	0.6666	none	none	none	none	none	none
ENSMUSG00000020152	Actr2	none	2306.05	0.169074	0.481496	4351.4	0.110952	0.789096	1245.44	-0.024353	0.994132	1179.86	0.398617	0.0294407	1497.74	0.13049	0.811141	-0.1618	0.3291	none	none	none	none	none	none
ENSMUSG00000026341	Actr3	none	296.39	-0.00113207	0.999806	780.918	0.230277	0.401743	147.052	-0.0656886	0.994132	158.081	0.285648	0.323868	292.752	0.698171	0.0557202	-0.02606	0.8999	none	none	none	none	none	none
ENSMUSG00000056367	Actr3b	none	657.133	-0.174048	0.606812	1227.01	-0.197369	0.481968	168.271	0.0657967	0.993949	287.005	-0.545038	0.0169593	50.8768	1.01517	0.170156	-0.4746	3.931e-06	none	none	none	none	none	none
ENSMUSG00000037761	Actr5	none	29.2353	0.373764	NA	17.7982	0.430042	0.827037	10.1483	0.203181	0.993823	11.7498	-0.710522	0.408123	15.1822	0.187441	0.941512	0.1665	0.5655	none	none	none	none	none	none
ENSMUSG00000019948	Actr6	none	145.782	-0.672617	0.10278	255.353	0.0481626	0.952226	101.889	-0.0743065	0.994132	93.6092	-0.243808	0.514061	41.2997	-0.820406	0.343758	-0.1111	0.5885	none	none	none	none	none	none
ENSMUSG00000015971	Actr8	none	438.843	-0.0126862	0.985047	497.067	0.250825	0.306589	269.713	0.0851165	0.980439	168.217	-0.353511	0.202637	66.4789	0.28714	0.808354	-0.1084	0.4553	none	none	none	none	none	none
ENSMUSG00000037737	Actrt3	none	6.05671	0.799661	NA	NA	NA	NA	8.62543	-0.127867	0.994132	NA	NA	NA	NA	NA	NA	NA	NA	none	none	none	none	none	none
ENSMUSG00000026836	Acvr1	none	264.497	-0.141813	0.800932	502.879	0.281769	0.3546	151.273	-0.201017	0.922347	305.75	0.195943	0.497314	122.654	-0.336813	0.636803	0.1024	0.6234	none	none	none	none	none	none
ENSMUSG00000000532	Acvr1b	none	838.018	0.0969418	0.788037	610.951	-0.157765	0.663231	317.919	-0.235325	0.789975	392.881	0.228598	0.372838	84.6356	-0.40268	0.647499	-0.07612	0.5988	none	none	none	none	none	none
ENSMUSG00000026834	Acvr1c	none	170.963	-0.518909	0.186106	245.11	0.899794	3.68216e-06	37.0426	-0.944602	0.323408	125.7	-0.876699	0.00191064	10.0591	-2.50169	0.0913153	0.7353	4.8e-05	none	none	none	none	none	none
ENSMUSG00000052155	Acvr2a	none	430.357	-0.140738	0.729758	498.234	-0.266519	0.392616	142.321	-0.494423	0.37592	455.764	-0.509716	0.0171001	41.0515	-0.485412	0.676982	-0.3345	0.03092	none	none	none	none	none	none
ENSMUSG00000061393	Acvr2b	none	16.2273	-0.0733481	NA	5.13037	-0.375874	NA	11.1039	0.0760004	0.994132	14.2855	-0.862346	0.234137	NA	NA	NA	0.2334	0.5712	none	none	none	none	none	none
ENSMUSG00000000530	Acvrl1	none	22.8183	-0.494865	NA	NA	NA	NA	NA	NA	NA	10.1743	-0.170905	0.891178	110.039	0.954382	0.0510066	0.1116	0.5813	none	none	none	none	none	none
ENSMUSG00000023262	Acy1	none	52.4005	-0.033078	NA	19.652	0.392636	0.830874	17.7248	0.0272191	0.995591	49.8033	-0.145825	0.789065	18.5483	-2.34328	0.0217744	0.2642	0.2657	none	none	none	none	decreasing	none
ENSMUSG00000024866	Acy3	none	7.33026	-0.00339337	NA	NA	NA	NA	NA	NA	NA	13.6153	1.85254	0.00461645	NA	NA	NA	0.9336	0.009501	none	none	none	increasing	none	none
ENSMUSG00000008822	Acyp1	none	278.362	-0.428784	0.188533	376.062	0.33338	0.332133	436.562	0.211311	0.845874	283.107	0.2311	0.373423	42.7144	-0.0901217	0.960332	0.06436	0.8419	none	none	none	none	none	none
ENSMUSG00000060923	Acyp2	none	168.415	0.0829626	0.915024	136.695	-0.0821548	0.933754	397.117	-0.105304	0.970586	400.898	0.271031	0.257246	17.1223	-0.394238	0.848129	-0.03351	0.9109	none	none	none	none	none	none
ENSMUSG00000027259	Adal	none	75.2688	-0.429122	NA	85.5097	0.0881196	0.941077	95.0521	-0.150026	0.973802	93.0338	-0.458984	0.151171	23.3714	-0.189296	0.926459	-0.122	0.5733	none	none	none	none	none	none
ENSMUSG00000054693	Adam10	none	640.835	-0.211296	0.482731	1016.36	0.050923	0.933754	419.153	-0.341572	0.732746	1151.79	-0.0923163	0.73975	1624.86	0.600894	0.0272218	0.1167	0.4511	none	none	none	none	none	none
ENSMUSG00000020926	Adam11	none	557.923	-0.0402802	0.941	725.706	-0.465168	0.00609938	311.171	-0.341288	0.596544	392.316	-0.497322	0.0388252	23.1133	-1.52341	0.198927	-0.1341	0.5807	none	none	none	none	none	none
ENSMUSG00000028041	Adam15	none	238.175	-0.0645345	0.927282	157.606	-0.0560519	0.955215	193.833	-0.140679	0.957654	249.241	0.484522	0.0436706	380.704	-0.295282	0.55523	0.3295	0.02953	none	none	none	none	none	none
ENSMUSG00000052593	Adam17	none	23.8383	0.338908	NA	22.8291	0.51128	0.723763	35.3773	-0.574205	0.790356	293.163	0.00342854	0.992506	1065.58	0.980495	9.51859e-05	0.8876	2.004e-09	none	none	none	none	none	none
ENSMUSG00000031552	Adam18	none	11.5112	-0.651066	NA	9.95804	-0.677346	NA	NA	NA	NA	4.84067	1.03499	0.478413	NA	NA	NA	-0.08135	0.8946	none	none	none	none	none	none
ENSMUSG00000011256	Adam19	none	66.7506	-0.591499	NA	33.1113	-0.0637835	0.977112	38.8042	-0.750789	0.4354	31.2716	-0.171856	0.82266	NA	NA	NA	-0.6763	6.752e-06	none	none	none	none	none	none
ENSMUSG00000040537	Adam22	none	2029.84	-0.0703218	0.82	2115.37	0.0045003	0.993322	1392.72	-0.265331	0.731814	1243.69	-0.190233	0.500519	102.418	-1.29782	0.0301089	-0.1252	0.428	none	none	none	none	decreasing+neuronal	none
ENSMUSG00000025964	Adam23	none	1158.87	-0.184532	0.49274	781.135	-0.271819	0.289669	2360.88	-0.501991	0.104871	759.678	0.00972232	0.980822	101.132	-1.66964	0.305245	-0.1577	0.1965	none	none	none	none	none	none
ENSMUSG00000027318	Adam33	none	4.8903	-0.81288	NA	NA	NA	NA	NA	NA	NA	NA	NA	NA	7.26415	3.20341	0.159893	-0.734	0.1665	none	none	none	none	none	none
ENSMUSG00000031555	Adam9	none	296.437	-0.136042	0.775491	241.032	0.00946832	0.991736	258.124	-0.395346	0.453085	597.347	0.763309	3.81029e-05	424.17	0.767582	0.0151296	0.496	8.814e-07	none	none	none	none	none	none
ENSMUSG00000022893	Adamts1	none	30.7903	0.793569	NA	92.5142	-0.516554	0.349957	125.673	0.377853	0.798348	749.916	1.50523	2.55919e-16	27.0465	1.57243	0.135208	0.3243	0.08857	none	none	none	increasing	none	none
ENSMUSG00000014852	Adamts13	none	7.2039	0.204619	NA	4.18829	0.392174	NA	NA	NA	NA	3.63122	-0.842082	0.636077	NA	NA	NA	0.101	0.8894	none	none	none	none	none	none
ENSMUSG00000033453	Adamts15	none	6.42626	-0.498953	NA	3.94222	0.304935	NA	55.0341	-0.482114	0.723123	10.2881	-0.0948324	0.946993	NA	NA	NA	-0.7256	0.01813	none	none	none	none	none	none
ENSMUSG00000058145	Adamts17	none	11.3359	-0.0661804	NA	13.7114	0.540559	0.781054	15.1816	-0.456864	0.950864	8.31588	0.695572	0.513574	NA	NA	NA	-0.1694	0.6302	none	none	none	none	none	none
ENSMUSG00000053399	Adamts18	none	NA	NA	NA	NA	NA	NA	NA	NA	NA	NA	NA	NA	NA	NA	NA	0.6571	0.1928	none	none	none	none	none	none
ENSMUSG00000036545	Adamts2	none	46.2194	0.526968	NA	31.7244	-1.27786	0.0235271	99.478	-0.00808362	0.997323	55.5328	-0.292355	0.519031	4.56534	-1.67896	0.561276	-0.2353	0.6846	none	decreasing	none	none	none	none
ENSMUSG00000022449	Adamts20	none	10.4417	0.540511	NA	20.7682	-0.67939	0.568852	6.95963	-0.646746	0.950864	40.4346	0.392825	0.416708	NA	NA	NA	0.3517	0.02275	none	none	none	none	none	none
ENSMUSG00000043635	Adamts3	none	193.842	-0.0694998	0.927999	286.377	-0.0545317	0.943358	619.751	-0.580826	0.0989793	109.753	-0.372863	0.243049	14.6526	-1.28492	0.36848	-0.04306	0.8419	none	none	none	none	none	none
ENSMUSG00000006403	Adamts4	none	30.8004	0.566975	NA	4.58909	-1.19003	NA	280.793	-0.694833	0.0710389	139.838	2.92983	1.81578e-30	16.7308	-0.666869	0.716375	0.4402	0.02071	none	none	none	increasing	none	none
ENSMUSG00000022894	Adamts5	none	NA	NA	NA	NA	NA	NA	5.82001	-0.300512	0.991399	16.353	1.62527	0.00551214	NA	NA	NA	0.5894	0.1555	none	none	none	increasing	none	none
ENSMUSG00000031994	Adamts8	none	8.77978	-0.3654	NA	16.8377	0.645964	0.675189	60.4762	-0.794719	0.21406	8.7515	-1.45406	0.0891487	NA	NA	NA	0.1974	0.6103	none	none	none	none	none	none
ENSMUSG00000030022	Adamts9	none	NA	NA	NA	25.3962	-0.365014	0.834008	4.12783	0.491404	0.983338	44.4228	-0.146749	0.808797	NA	NA	NA	0.01906	0.9515	none	none	none	none	none	none
ENSMUSG00000066113	Adamtsl1	none	28.7087	0.231802	NA	41.4001	-0.30325	0.795282	14.2422	0.0797219	0.994132	81.2918	1.71337	2.25882e-09	8.26345	-0.960431	0.690396	0.01306	0.9719	none	none	none	increasing	none	none
ENSMUSG00000036040	Adamtsl2	none	37.5867	0.287136	NA	10.3491	-0.185173	NA	NA	NA	NA	31.958	1.23435	0.00589837	20.116	-1.82626	0.06812	-0.2604	0.4221	none	none	none	increasing	none	none
ENSMUSG00000070469	Adamtsl3	none	6.8442	1.00421	NA	NA	NA	NA	8.64509	-0.443997	0.977729	176.792	2.86803	1.84714e-36	NA	NA	NA	3.009	2.284e-28	none	none	none	increasing	none	increasing
ENSMUSG00000015850	Adamtsl4	none	5.8721	0.994727	NA	NA	NA	NA	7.60429	-1.06576	0.789975	90.9401	3.98285	1.23347e-31	8.3511	-0.551153	0.858539	1.663	4.761e-21	none	none	none	increasing	none	increasing
ENSMUSG00000043822	Adamtsl5	none	5.17235	0.783003	NA	NA	NA	NA	31.7277	0.365691	0.947187	42.6259	1.19349	0.002645	NA	NA	NA	1.004	0.0007434	none	none	none	increasing	none	increasing
ENSMUSG00000056413	Adap1	none	473.961	0.319242	0.32181	236.257	-0.155278	0.761918	182.321	0.190842	0.924628	92.8174	-0.057828	0.90534	43.9818	0.390231	0.757262	-0.1498	0.2932	none	none	none	none	none	none
ENSMUSG00000027951	Adar	none	1600.07	-0.0561321	0.880501	1159.05	-0.14463	0.642807	525.444	-0.0507806	0.994132	217.998	-0.542068	0.017493	123.766	0.230696	0.786326	-0.1622	0.2258	none	none	none	none	none	none
ENSMUSG00000020262	Adarb1	none	437.89	-0.064602	0.90307	373.126	-0.252929	0.462856	694.706	-0.0484911	0.992723	134.71	-0.0488144	0.914925	33.5503	-0.759963	0.508381	-0.3671	0.001609	none	none	none	none	none	none
ENSMUSG00000052551	Adarb2	none	24.1795	0.33694	NA	36.7862	0.0799609	0.968072	69.1181	0.213842	0.957654	11.1244	0.0925327	0.944982	9.97887	-2.95366	0.0508674	-0.362	0.04906	none	none	none	none	none	none
ENSMUSG00000031949	Adat1	none	24.6641	0.177347	NA	33.6223	-0.0517354	0.980035	23.5313	0.0473871	0.994132	12.7711	-0.199598	0.847518	4.77197	-0.342584	0.94384	-0.2059	0.4476	none	none	none	none	none	none
ENSMUSG00000019808	Adat2	none	43.7771	-0.806985	NA	53.773	-0.0533371	0.975511	21.4419	0.0832812	0.994132	40.8339	0.181559	0.760041	12.8972	0.167385	0.956602	-0.1196	0.7082	none	none	none	none	none	none
ENSMUSG00000021044	Adck1	none	160.714	0.517061	0.21622	176.773	0.0373067	0.97041	75.5314	0.132398	0.982927	93.3376	-0.223316	0.542939	31.1563	-0.313991	0.832646	-0.02572	0.8904	none	none	none	none	none	none
ENSMUSG00000046947	Adck2	none	61.357	0.534915	NA	59.6963	-0.191498	0.862246	48.7743	0.349529	0.902699	36.8705	-0.0264908	0.976112	20.5389	-0.443228	0.805602	0.07009	0.7332	none	none	none	none	none	none
ENSMUSG00000022550	Adck5	none	29.7395	0.0981076	NA	27.3142	0.127146	0.952257	14.6204	0.326603	0.977337	13.3562	-0.171893	0.87444	10.3629	-0.321197	0.911428	-0.02344	0.9259	none	none	none	none	none	none
ENSMUSG00000020431	Adcy1	none	574.013	0.173744	0.695168	688.048	-0.0605856	0.919014	452.934	-0.258021	0.676058	153.382	-0.56615	0.0719681	56.3682	-2.5623	4.09423e-05	-0.6317	0.003806	none	none	none	none	decreasing+neuronal	none
ENSMUSG00000026567	Adcy10	none	NA	NA	NA	NA	NA	NA	NA	NA	NA	NA	NA	NA	NA	NA	NA	NA	NA	none	none	none	none	none	none
ENSMUSG00000021536	Adcy2	none	1023.24	-0.336392	0.121021	1204.28	-0.210727	0.415318	204.384	-0.122461	0.972545	1521.86	-1.04148	2.38983e-07	43.6949	-1.54485	0.0310002	-0.4964	2.472e-05	none	none	none	decreasing	decreasing+neuronal	none
ENSMUSG00000020654	Adcy3	none	390.773	-0.128989	0.769891	370.531	-0.28142	0.273424	254.845	-0.0247762	0.994132	270.638	-0.119249	0.74158	72.5363	1.00487	0.100138	-0.3075	0.01327	none	none	none	none	none	none
ENSMUSG00000022840	Adcy5	none	342.163	-0.310642	0.753099	85.4812	0.292719	0.681366	63.2724	0.179201	0.970586	86.6786	0.00794135	0.989172	23.7771	-1.80473	0.0650806	-0.3595	0.003631	none	none	none	none	none	none
ENSMUSG00000022994	Adcy6	none	110.181	0.341516	0.580069	77.328	-0.153872	0.884031	28.6688	-0.147461	0.991361	116.21	0.0994024	0.813667	12.835	-1.69263	0.231062	-0.06805	0.6684	none	none	none	none	none	none
ENSMUSG00000031659	Adcy7	none	10.6075	-0.0292152	NA	NA	NA	NA	12.2353	0.912552	0.715025	15.4557	0.537242	0.530072	290.783	0.852579	0.0140801	2.485	3.556e-49	none	none	none	none	none	increasing
ENSMUSG00000022376	Adcy8	none	179.85	-0.173522	0.7667	174.58	-0.974572	4.18292e-05	189.682	-0.186429	0.921583	275.734	-0.373109	0.210176	24.2056	-2.1991	0.01189	-0.7187	1.255e-06	none	none	none	none	decreasing+neuronal	none
ENSMUSG00000005580	Adcy9	none	639.507	0.175337	0.613922	1208.04	0.222841	0.509147	383.572	-0.184861	0.897824	319.829	-0.0890624	0.822713	65.4301	-0.665343	0.387384	-0.09422	0.5129	none	none	none	none	none	none
ENSMUSG00000024256	Adcyap1	none	249.504	-0.105058	0.859784	46.9231	0.289421	0.856321	93.7538	0.92516	0.0162955	175.576	-0.108738	0.808314	NA	NA	NA	-0.4073	0.353	none	none	none	none	none	none
ENSMUSG00000029778	Adcyap1r1	none	484.817	0.156098	0.688113	482.798	-0.463888	0.0694525	443.691	-0.0678972	0.991361	3832.86	-0.699917	0.000786899	48.7844	-1.07898	0.228243	-0.1708	0.2847	none	none	none	none	none	none
ENSMUSG00000029106	Add1	none	2549.6	0.130716	0.651128	2577.28	0.11337	0.707479	732.966	-0.106127	0.957654	1037.58	-0.0550522	0.844527	336.477	-0.454986	0.276531	-0.1614	0.3226	none	none	none	none	none	none
ENSMUSG00000030000	Add2	none	1272.21	0.236855	0.351843	1467.31	0.218443	0.24551	302.977	0.0941327	0.983491	204.381	-0.207448	0.527796	31.0081	-1.71092	0.0274837	-0.364	0.004331	none	none	none	none	decreasing+neuronal	none
ENSMUSG00000025026	Add3	none	529.149	-0.186858	0.591096	736.616	-0.0855109	0.845095	443.943	-0.145689	0.918876	2264.18	0.611478	1.48327e-05	215.92	-0.360986	0.51553	1.138	2.32e-16	none	none	none	none	none	increasing
ENSMUSG00000025475	Adgra1	none	373.155	0.319072	0.33056	185.708	-0.192342	0.746575	121.653	0.0706712	0.992723	266.311	-0.046442	0.901317	14.0274	-0.816161	0.652407	NA	NA	none	none	none	none	none	none
ENSMUSG00000031486	Adgra2	none	NA	NA	NA	NA	NA	NA	NA	NA	NA	NA	NA	NA	NA	NA	NA	NA	NA	none	none	none	none	none	none
ENSMUSG00000029090	Adgra3	none	26.2693	0.238075	NA	21.8786	-0.559048	0.661587	87.1906	-0.328734	0.828319	215.231	0.00453331	0.991799	18.8274	-0.17777	0.936718	NA	NA	none	none	none	none	none	none
ENSMUSG00000034730	Adgrb1	none	1183.17	-0.0473309	0.924427	843.09	0.0303328	0.965216	468.585	-0.118354	0.967703	944.148	-0.529927	0.00148301	60.6073	-1.7785	0.0119885	NA	NA	none	none	none	none	decreasing+neuronal	none
ENSMUSG00000028782	Adgrb2	none	912.04	0.154797	0.632228	1283.42	0.247682	0.481264	109.018	-0.201625	0.943752	658.509	-0.11717	0.688967	50.7222	-1.96576	0.00485585	NA	NA	none	none	none	none	decreasing+neuronal	none
ENSMUSG00000033569	Adgrb3	none	1129.81	-0.128481	0.685066	1919.06	0.0225795	0.972482	1247.89	-0.368622	0.496399	1351.33	-0.384209	0.0402945	70.9209	-1.3719	0.0666706	NA	NA	none	none	none	none	none	none
ENSMUSG00000044017	Adgrd1	none	28.8159	-0.239638	NA	5.48409	-0.19346	NA	3.10548	-0.490678	0.991361	8.09578	0.652722	0.559933	NA	NA	NA	NA	NA	none	none	none	none	none	none
ENSMUSG00000004730	Adgre1	none	14.8656	2.43481	NA	4.56139	-0.0249952	NA	5.53605	0.432677	0.988825	18.8255	1.82331	0.0010968	3476.87	0.653198	0.0115623	NA	NA	none	none	none	increasing	none	none
ENSMUSG00000002885	Adgre5	none	6.88268	0.601856	NA	NA	NA	NA	11.4765	0.200794	0.992723	445.78	0.62403	0.0033566	48.3422	0.336888	0.837424	NA	NA	none	none	none	none	none	none
ENSMUSG00000023918	Adgrf4	none	9.50873	-1.09257	NA	40.056	1.89506	4.5107e-05	NA	NA	NA	4.10044	0.913875	0.572792	NA	NA	NA	NA	NA	none	increasing	none	none	none	none
ENSMUSG00000056492	Adgrf5	none	10.1304	0.190782	NA	46.3712	0.28375	0.830874	22.2867	-0.101435	0.994132	25.1011	-0.150158	0.84671	15.9842	-0.94861	0.543728	NA	NA	none	none	none	none	none	none
ENSMUSG00000031785	Adgrg1	none	132.816	0.662648	0.127868	76.9157	0.391387	0.548567	97.6578	0.17376	0.958938	4267.88	-0.0811628	0.820001	1578.28	-0.957772	6.25213e-05	NA	NA	none	none	none	none	none	none
ENSMUSG00000031298	Adgrg2	none	6.40675	-0.736708	NA	18.3131	-0.0332138	0.990159	14.1128	-0.497039	0.939405	21.1068	-0.143678	0.868895	NA	NA	NA	NA	NA	none	none	none	none	none	none
ENSMUSG00000039116	Adgrg6	none	32.3844	0.206537	NA	NA	NA	NA	NA	NA	NA	68.3867	1.24721	0.000308283	NA	NA	NA	NA	NA	none	none	none	increasing	none	none
ENSMUSG00000013033	Adgrl1	none	2528.86	0.15808	0.560407	1985.63	0.158916	0.578263	882.596	-0.134174	0.939405	1301.85	-0.175955	0.501242	112.949	-2.23166	1.94682e-05	NA	NA	none	none	none	none	decreasing+neuronal	none
ENSMUSG00000028184	Adgrl2	none	738.742	-0.173546	0.598211	635.067	-0.207445	0.535189	646.422	-0.339409	0.566797	372.811	-0.3545	0.194826	129.928	-0.246175	0.781189	NA	NA	none	none	none	none	none	none
ENSMUSG00000037605	Adgrl3	none	1620.33	-0.108941	0.713572	1906.45	0.227047	0.263111	887.842	-0.146308	0.950864	2726.13	-0.427791	0.00892315	81.0446	-1.09625	0.120956	NA	NA	none	none	none	none	none	none
ENSMUSG00000039167	Adgrl4	none	6.51369	0.492255	NA	NA	NA	NA	20.5163	-0.525084	0.878819	8.01298	-0.215353	0.884943	7.27211	-0.673586	0.829348	NA	NA	none	none	none	none	none	none
ENSMUSG00000069170	Adgrv1	none	3.99526	0.213861	NA	NA	NA	NA	13.2871	0.222607	0.991361	47.7219	1.09352	0.00176996	NA	NA	NA	NA	NA	none	none	none	increasing	none	none
ENSMUSG00000028138	Adh5	none	326.944	0.199185	0.653639	363.647	0.0657472	0.931565	316.259	0.140969	0.952967	435.447	-0.205151	0.458459	196.968	0.178545	0.811141	0.2888	0.01782	none	none	none	none	none	none
ENSMUSG00000025911	Adhfe1	none	10.6847	0.578752	NA	NA	NA	NA	10.8177	-1.04118	0.671327	336.098	-0.4513	0.0438644	NA	NA	NA	0.01489	0.9492	none	none	none	none	none	none
ENSMUSG00000020629	Adi1	none	137.382	0.0418766	0.96378	120.828	-0.177954	0.856869	154.613	-0.141311	0.967703	385.653	-0.00213097	0.99494	146.024	0.845086	0.0870536	0.1736	0.2905	none	none	none	none	none	none
ENSMUSG00000026457	Adipor1	none	191.507	0.0497394	0.952325	149.101	-0.356809	0.384099	153.167	-0.109828	0.979472	456.167	0.494284	0.0153558	352.227	0.182643	0.763829	0.5622	8.697e-09	none	none	none	none	none	none
ENSMUSG00000030168	Adipor2	none	116.491	0.10109	0.915277	75.4435	-0.171336	0.880072	100.764	-0.3072	0.86867	293.569	0.23532	0.393301	132.291	0.0786466	0.941659	0.5136	0.0001867	none	none	none	none	none	none
ENSMUSG00000039197	Adk	none	348.398	0.13523	0.770613	252.993	-0.0234721	0.980844	516.796	0.168216	0.895024	1413.11	0.246639	0.346478	38.7856	-0.384797	0.760816	0.6324	4.83e-09	none	none	none	none	none	none
ENSMUSG00000030790	Adm	none	NA	NA	NA	NA	NA	NA	35.1202	-0.28723	0.956332	23.7092	0.707441	0.217192	NA	NA	NA	-0.1119	0.848	none	none	none	none	none	none
ENSMUSG00000051149	Adnp	none	7.95226	0.486163	NA	NA	NA	NA	NA	NA	NA	7.7641	-0.704792	0.55557	8.69086	-0.897403	0.706661	-0.111	0.4294	none	none	none	none	none	none
ENSMUSG00000053950	Adnp2	none	184.4	0.189803	0.732933	214.448	0.210353	0.667198	127.034	0.0570997	0.994132	80.0976	0.211745	0.591731	48.0151	0.101799	0.948986	-0.284	0.05239	none	none	none	none	none	none
ENSMUSG00000057134	Ado	none	123.761	0.276478	0.669596	106.574	-0.0332677	0.980844	84.7365	0.114664	0.98964	59.2661	0.494219	0.176336	30.9647	0.0985021	0.96092	-0.239	0.06898	none	none	none	none	none	none
ENSMUSG00000042429	Adora1	none	369.71	0.0746728	0.892274	385.164	-0.0604398	0.935111	128.691	0.229709	0.898801	477.406	0.506694	0.0135126	16.7612	-0.790158	0.671061	-0.06022	0.7469	none	none	none	none	none	none
ENSMUSG00000020178	Adora2a	none	56.196	-1.16593	NA	NA	NA	NA	NA	NA	NA	18.1781	-0.850837	0.178366	NA	NA	NA	0.1169	0.8427	none	none	none	none	none	none
ENSMUSG00000025236	Adpgk	none	69.8341	0.208394	NA	81.5229	-0.0169455	0.990159	78.9298	-0.170639	0.964931	144.17	-0.314856	0.348349	31.8427	-0.0176985	0.991864	0.0753	0.7326	none	none	none	none	none	none
ENSMUSG00000002844	Adprh	none	819.15	-0.0195726	0.970044	974.561	-0.11904	0.733001	526.489	0.0958895	0.972545	528.2	-0.165489	0.503822	205.101	-0.206362	0.767742	0.0599	0.7596	none	none	none	none	none	none
ENSMUSG00000042558	Adprhl2	none	57.0974	0.710847	NA	46.204	0.0221666	0.989562	31.2533	-0.0194985	0.995591	34.9355	0.381121	0.50942	22.5913	0.738593	0.604107	0.1796	0.4654	none	none	none	none	none	none
ENSMUSG00000020910	Adprm	none	47.2594	-0.0133849	NA	48.2275	-0.00235823	0.998738	39.2019	0.24835	0.962425	41.92	-0.196755	0.727521	14.2402	0.346855	0.885226	NA	NA	none	none	none	none	none	none
ENSMUSG00000045875	Adra1a	none	48.2023	-0.734357	NA	29.9883	-0.218014	0.905581	72.2277	-0.130154	0.98543	169.309	-0.201	0.530256	4.56534	-1.67896	0.561276	0.1997	0.5932	none	none	none	none	none	none
ENSMUSG00000050541	Adra1b	none	103.637	-0.0231909	0.9845	NA	NA	NA	26.5546	0.0670311	0.994132	54.1556	-0.993884	0.00363965	NA	NA	NA	-0.5727	0.2139	none	none	none	none	none	none
ENSMUSG00000027335	Adra1d	none	218.873	-0.385163	0.360339	254.703	-0.0392366	0.972157	44.8112	-0.237603	0.958938	48.3719	-0.245167	0.620121	NA	NA	NA	-0.1996	0.2706	none	none	none	none	none	none
ENSMUSG00000033717	Adra2a	none	41.708	0.54944	NA	21.6796	-0.237746	0.913394	19.0562	0.615839	0.812669	127.021	-0.276001	0.399518	4.28504	-1.74504	0.554909	0.1169	0.7267	none	none	none	none	none	none
ENSMUSG00000045318	Adra2c	none	11.2874	0.332044	NA	12.7043	0.443375	0.852909	NA	NA	NA	4.36187	-0.138619	0.944518	NA	NA	NA	-0.01629	0.9571	none	none	none	none	none	none
ENSMUSG00000035283	Adrb1	none	57.4875	-0.330733	NA	20.5504	-0.491089	0.739032	10.5191	0.64401	0.918876	34.9336	0.0288413	0.97452	8.36166	-0.263821	0.939896	-0.2925	0.1927	none	none	none	none	none	none
ENSMUSG00000045730	Adrb2	none	6.64984	1.46791	NA	NA	NA	NA	11.4358	0.140541	0.994132	NA	NA	NA	97.581	-1.0353	0.0338425	0.4296	0.2775	none	none	none	none	decreasing	none
ENSMUSG00000031489	Adrb3	none	NA	NA	NA	NA	NA	NA	NA	NA	NA	NA	NA	NA	NA	NA	NA	0.04106	0.9616	none	none	none	none	none	none
ENSMUSG00000039041	Adrm1	none	47.1413	0.0483468	NA	43.5885	-0.369939	0.74343	39.7822	-0.195377	0.981051	26.9264	0.0448798	0.959155	21.5841	-0.217019	0.922824	0.2178	0.2285	none	none	none	none	none	none
ENSMUSG00000022407	Adsl	none	151.83	0.02445	0.979677	115.79	0.0183669	0.988347	124.882	0.324318	0.719513	93.4132	-0.234267	0.534505	44.4286	-0.178316	0.90951	0.01572	0.9461	none	none	none	none	none	none
ENSMUSG00000015961	Adss	none	415.293	-0.354306	0.324472	667.11	-0.0864735	0.852909	339.218	0.281629	0.665013	215.104	0.19128	0.55092	93.8611	0.248727	0.801826	-0.2126	0.06435	none	none	none	none	none	none
ENSMUSG00000011148	Adssl1	none	58.77	0.139866	NA	10.4729	0.131731	NA	109.574	0.459448	0.632818	24.6488	1.00497	0.0424181	98.9131	1.98991	9.31871e-06	0.9512	3.814e-12	none	none	none	increasing	increasing	none
ENSMUSG00000020473	Aebp1	none	33.93	1.18079	NA	NA	NA	NA	21.0502	1.01658	0.458357	650.537	2.53369	1.39569e-38	16.9352	-1.30196	0.340548	2.616	7.509e-41	none	none	none	increasing	none	increasing
ENSMUSG00000030232	Aebp2	none	210.047	-0.0237537	0.977701	236.735	-0.104322	0.880072	280.093	-0.391871	0.485157	226.288	0.0147374	0.973116	157.878	0.481537	0.38145	-0.1185	0.4	none	none	none	none	none	none
ENSMUSG00000030609	Aen	none	62.7267	0.345362	NA	42.6897	-0.116671	0.942708	67.3674	-0.197055	0.972154	96.635	0.477596	0.14352	15.0373	0.188048	0.942425	0.2756	0.1371	none	none	none	none	none	none
ENSMUSG00000065022	AF357341	none	9.28455	-0.366479	NA	5.37521	1.81164	NA	8.83979	0.372982	0.980439	15.1744	0.636813	0.402637	NA	NA	NA	NA	NA	none	none	none	none	none	none
ENSMUSG00000065749	AF357428	none	271.363	0.0765763	0.980345	24.8897	0.114969	0.964611	63.3392	0.739796	0.387264	88.1512	1.10612	0.000252318	20.8777	-0.111615	0.967393	NA	NA	none	none	none	increasing	none	none
ENSMUSG00000029094	Afap1	none	19.6385	0.542355	NA	15.1914	-0.278617	0.913926	44.734	-0.0968988	0.994132	84.6842	0.0392799	0.941277	28.2385	0.228633	0.90511	-0.01544	0.9415	none	none	none	none	none	none
ENSMUSG00000033032	Afap1l1	none	62.5162	0.592619	NA	3.46318	-0.425342	NA	4.52466	0.00777701	0.997991	6.45873	-0.229719	0.8767	29.7538	-0.471249	0.726779	-0.04505	0.8694	none	none	none	none	none	none
ENSMUSG00000025083	Afap1l2	none	6.6403	0.863841	NA	11.0064	-0.462053	NA	72.6793	-0.00496536	0.997323	110.845	1.20809	1.14969e-06	NA	NA	NA	0.8569	3.334e-08	none	none	none	increasing	none	none
ENSMUSG00000068036	Afdn	none	665.329	-0.169018	0.633058	603.976	-0.377349	0.0563373	176.989	0.16902	0.950864	119.836	-0.36304	0.275017	64.5966	-0.274795	0.817516	NA	NA	none	none	none	none	none	none
ENSMUSG00000029313	Aff1	none	61.5509	0.16974	NA	63.9446	0.545109	0.308648	231.34	-0.0707959	0.991399	119.13	0.472804	0.176221	92.3486	-0.117292	0.925207	0.5726	7.146e-07	none	none	none	none	none	none
ENSMUSG00000031189	Aff2	none	249.194	-0.204696	0.676485	209.416	-0.112584	0.89718	314.991	0.0802125	0.98543	79.7533	0.117382	0.816815	11.0084	-0.897896	0.670716	-0.1391	0.6185	none	none	none	none	none	none
ENSMUSG00000037138	Aff3	none	361.329	-0.336801	0.326077	524.081	0.0426991	0.946536	143.69	-0.0772611	0.991399	87.4743	-0.206	0.652128	15.0649	-3.46597	0.00541332	-0.2892	0.01312	none	none	none	none	decreasing+neuronal	none
ENSMUSG00000049470	Aff4	none	1335.44	-0.251256	0.25507	1779.64	-0.00595522	0.991736	770.193	0.150402	0.88643	684.597	-0.199566	0.37263	191.294	0.213402	0.764286	0.009305	0.9664	none	none	none	none	none	none
ENSMUSG00000038302	Afg1l	none	70.6987	-0.150826	NA	77.2149	-0.31606	0.648578	38.2771	-0.00650556	0.997323	69.7368	-0.0839697	0.874734	10.3012	-0.399549	0.886967	NA	NA	none	none	none	none	none	none
ENSMUSG00000031967	Afg3l1	none	38.986	-0.349685	NA	42.1368	0.168413	0.915692	25.6864	0.247653	0.977337	70.5009	0.726847	0.026212	27.3205	0.406386	0.798277	0.2059	0.1408	none	none	none	none	none	none
ENSMUSG00000024527	Afg3l2	none	609.745	-0.154878	0.661761	582.958	-0.153497	0.72458	352.386	0.0252583	0.994132	178.547	0.26549	0.352019	77.255	-0.0757557	0.956075	-0.009223	0.9567	none	none	none	none	none	none
ENSMUSG00000017718	Afmid	none	NA	NA	NA	NA	NA	NA	NA	NA	NA	4.95565	0.201837	0.912247	NA	NA	NA	0.7867	0.008454	none	none	none	none	none	none
ENSMUSG00000049659	Aftph	none	643.597	-0.252973	0.426126	757.043	0.0281233	0.968146	643.204	-0.0685303	0.990737	467.75	-0.213762	0.382386	306.821	0.0305839	0.977855	-0.04789	0.7864	none	none	none	none	none	none
ENSMUSG00000031521	Aga	none	48.2891	0.271465	NA	38.1991	0.0436669	0.981872	94.4325	0.0851489	0.992723	407.767	-0.331524	0.19682	280.16	0.492158	0.265093	0.8927	4.184e-05	none	none	none	none	none	none
ENSMUSG00000055013	Agap1	none	264.65	0.350991	0.380559	252.577	0.419001	0.141823	200.629	0.196306	0.924885	185.016	0.456777	0.0563814	34.3748	-0.100516	0.960332	0.07991	0.5852	none	none	none	none	none	none
ENSMUSG00000025422	Agap2	none	1136.07	0.0568055	0.900583	1329.82	0.125692	0.750972	115.741	-0.0883398	0.991399	308.068	-0.141306	0.649114	76.9963	-2.07607	1.51586e-05	-0.2249	0.2861	none	none	none	none	decreasing+neuronal	none
ENSMUSG00000023353	Agap3	none	861.391	0.0744085	0.846277	952.176	-0.060094	0.927249	389.486	0.054781	0.992723	280.259	-0.0861035	0.810542	53.8926	-0.616284	0.485505	-0.1674	0.4138	none	none	none	none	none	none
ENSMUSG00000038836	Agbl3	none	37.6058	0.143389	NA	28.9475	-0.37413	0.772873	27.0028	0.526852	0.835985	61.6992	-0.000152518	0.99979	9.32781	0.259081	0.934301	0.292	0.2882	none	none	none	none	none	none
ENSMUSG00000061298	Agbl4	none	144.208	-0.155657	0.826299	109.169	-0.297073	0.634563	38.623	0.255869	0.957669	27.0406	-0.544202	0.349079	NA	NA	NA	-0.5609	0.08841	none	none	none	none	none	none
ENSMUSG00000029165	Agbl5	none	18.3275	0.335681	NA	10.5461	-0.233324	NA	8.97577	0.0356769	0.995891	11.3549	-0.512369	0.589263	9.40255	-1.03119	0.63548	-0.09963	0.668	none	none	none	none	none	none
ENSMUSG00000026159	Agfg1	none	783.618	-0.498978	0.0183342	756.699	-0.097638	0.86531	452.308	-0.233998	0.765531	349.89	-0.218221	0.371477	114.004	0.155581	0.876027	-0.126	0.3825	none	none	none	none	none	none
ENSMUSG00000029722	Agfg2	none	131.064	-0.00708068	0.995841	149.669	-0.0218344	0.984722	129.233	0.2182	0.924628	70.1741	0.441465	0.233693	14.2958	0.258016	0.918751	-0.03034	0.8658	none	none	none	none	none	none
ENSMUSG00000021681	Aggf1	none	85.7977	0.665966	NA	79.552	0.519014	0.270324	69.7322	0.0986473	0.991399	111.44	1.00893	3.7042e-05	41.143	0.0458504	0.983275	-0.04661	0.7718	none	none	none	increasing	none	none
ENSMUSG00000029916	Agk	none	72.3631	0.00170671	NA	65.9369	-0.370658	0.587504	32.4358	-0.0556376	0.994132	30.3989	-0.518834	0.319226	9.85464	-0.18015	0.957678	-0.5225	2.047e-05	none	none	none	none	none	none
ENSMUSG00000033400	Agl	none	169.145	0.28853	0.568781	190.908	0.415004	0.166458	372.335	0.0949452	0.977956	911.95	-0.604356	0.000257306	121.103	-0.467771	0.451936	0.06955	0.6538	none	none	none	none	none	none
ENSMUSG00000040706	Agmat	none	6.32928	-0.109009	NA	NA	NA	NA	4.48592	0.0693855	0.995591	NA	NA	NA	NA	NA	NA	0.288	0.6824	none	none	none	none	none	none
ENSMUSG00000050103	Agmo	none	14.5249	0.278871	NA	NA	NA	NA	3.90817	0.312684	0.994132	387.523	-0.896207	0.000142176	139.403	-1.00883	0.0208203	0.248	0.3813	none	none	none	none	decreasing	none
ENSMUSG00000041530	Ago1	none	208.773	-0.188771	0.717123	299.943	0.0458417	0.951869	139.98	-0.167968	0.957654	201.039	-0.505524	0.0391771	173.288	-0.258717	0.708655	NA	NA	none	none	none	none	none	none
ENSMUSG00000036698	Ago2	none	335.036	0.0920799	0.859784	281.767	0.147553	0.774499	242.662	-0.167919	0.939043	246.534	-0.102513	0.767164	86.6427	-0.148554	0.897284	NA	NA	none	none	none	none	none	none
ENSMUSG00000028842	Ago3	none	132.24	-0.302814	0.606713	161.667	-0.217411	0.685312	110.778	-0.322793	0.777081	301.489	-0.437122	0.040604	79.1472	-0.0449644	0.978072	NA	NA	none	none	none	none	none	none
ENSMUSG00000042500	Ago4	none	19.4542	0.161893	NA	21.0025	-0.232503	0.909682	12.8406	-0.641694	0.890571	20.4657	-1.03087	0.0674732	19.556	-0.762204	0.609226	NA	NA	none	none	none	none	none	none
ENSMUSG00000034254	Agpat1	none	333.876	0.0238535	0.9726	197.203	-0.0305902	0.976808	155.82	-0.16465	0.9512	242.871	-0.156387	0.615666	38.0357	0.507556	0.682497	-0.2444	0.05572	none	none	none	none	none	none
ENSMUSG00000001211	Agpat3	none	348.353	0.179226	0.671479	235.659	0.05338	0.949433	261.593	0.0500642	0.994132	1288.53	-0.190201	0.539509	138.45	-0.356493	0.604171	0.07094	0.6554	none	none	none	none	none	none
ENSMUSG00000023827	Agpat4	none	359.592	-0.182577	0.669596	461.13	-0.402167	0.0440205	55.7921	-0.00864309	0.997323	384.815	0.46647	0.0314894	36.7749	-0.391033	0.782821	-0.1947	0.1069	none	none	none	none	none	none
ENSMUSG00000031467	Agpat5	none	142.369	-0.302514	0.597231	154.623	0.364958	0.326064	263.159	-0.0308064	0.994132	1593.33	-0.471249	0.0121252	61.2824	0.422846	0.654192	-0.03452	0.8493	none	none	none	none	none	none
ENSMUSG00000042410	Agps	none	234.863	-0.401076	0.322081	236.904	-0.0214255	0.980844	111.937	0.130508	0.977729	177.057	-0.154386	0.643823	192.344	-0.111028	0.903629	0.1381	0.3888	none	none	none	none	none	none
ENSMUSG00000041936	Agrn	none	290.96	0.235678	0.586154	313.309	-0.174124	0.699017	89.131	-0.514018	0.537278	630.292	0.475908	0.0324162	68.6434	-0.063357	0.971795	0.1222	0.4948	none	none	none	none	none	none
ENSMUSG00000031980	Agt	none	44.8107	0.304185	NA	21.1884	0.576931	0.927249	50.263	0.900626	0.174081	10251.7	0.0950477	0.791963	54.7368	-0.368287	0.735908	0.01935	0.962	none	none	none	none	none	none
ENSMUSG00000021557	Agtpbp1	none	1419.72	-0.208317	0.374221	1792.01	-0.00161055	0.9975	774.463	0.00232188	0.997323	337.39	-0.156731	0.561395	93.0148	-1.13974	0.0300966	-0.2906	0.01971	none	none	none	none	decreasing+neuronal	none
ENSMUSG00000029007	Agtrap	none	4.30676	0.970569	NA	NA	NA	NA	23.0133	0.416099	0.924885	121.666	0.467877	0.177054	36.1917	0.93916	0.338575	0.8667	1.103e-08	none	none	none	none	none	none
ENSMUSG00000026491	Ahctf1	none	355.667	-0.0171132	0.983309	515.168	0.232166	0.446082	171.673	-0.0154414	0.994877	150.985	-0.268617	0.377454	109.529	-0.436318	0.52427	-0.0933	0.5747	none	none	none	none	none	none
ENSMUSG00000027597	Ahcy	none	NA	NA	NA	3.84358	0.111526	NA	NA	NA	NA	NA	NA	NA	NA	NA	NA	0.07781	0.7312	none	none	none	none	none	none
ENSMUSG00000027893	Ahcyl1	none	1665.95	-0.109181	0.711263	1465.56	0.0105884	0.984651	1452.91	0.00748389	0.995591	3380.92	-1.07139	2.56489e-13	269.986	0.227696	0.708494	-0.3638	0.01059	none	none	none	decreasing	none	none
ENSMUSG00000029772	Ahcyl2	none	274.678	-0.099763	0.856189	760.562	0.353095	0.0581905	693.985	0.00851079	0.995591	1043.04	-0.605596	0.000309671	93.1641	0.2828	0.776772	-0.1925	0.2409	none	none	none	none	none	none
ENSMUSG00000037692	Ahdc1	none	375.872	0.391349	0.214758	331.798	0.308599	0.292837	103.076	0.19406	0.957654	83.0653	-0.543051	0.0740254	23.071	-0.659968	0.655833	0.07063	0.8182	none	none	none	none	none	none
ENSMUSG00000019986	Ahi1	none	1098	-0.40013	0.0722696	2230.71	-0.145084	0.572394	415.177	0.0336229	0.994132	1028.85	-0.292751	0.17652	101.727	-1.53522	0.0110659	-0.3334	0.01257	none	none	none	none	decreasing+neuronal	none
ENSMUSG00000069833	Ahnak	none	78.2321	-0.235387	NA	29.4386	-0.721477	0.412211	94.2688	0.40415	0.712637	2513.92	2.62932	6.86823e-12	143.536	-0.90624	0.0998442	1.368	4.446e-21	none	none	none	increasing	none	increasing
ENSMUSG00000072812	Ahnak2	none	9.14831	-0.152062	NA	8.10809	-0.339278	NA	183.592	-0.0829256	0.991399	58.0506	3.4386	9.75917e-19	62.0473	3.95079	8.84709e-09	NA	NA	none	none	none	increasing	increasing	none
ENSMUSG00000019256	Ahr	none	55.1052	-0.603133	NA	69.0823	-0.543121	0.345111	43.7795	-0.366921	0.884347	16.6522	0.249985	0.779923	10.2299	-2.80532	0.051278	-0.4407	0.01359	none	none	none	none	none	none
ENSMUSG00000021037	Ahsa1	none	874.307	-0.0926812	0.79312	1009.34	-0.340363	0.0320497	693.313	-0.217074	0.710141	348.792	-0.320557	0.200679	182.309	-0.181544	0.811141	-0.5152	2.354e-08	none	none	none	none	none	none
ENSMUSG00000020288	Ahsa2	none	128.681	0.006599	0.996254	164.354	-0.367862	0.35049	89.813	-0.348366	0.768394	79.4118	-0.459994	0.189593	27.0611	0.015679	0.993629	-0.2962	0.069	none	none	none	none	none	none
ENSMUSG00000097745	AI115009	none	6.23196	0.923704	NA	NA	NA	NA	NA	NA	NA	NA	NA	NA	NA	NA	NA	-0.0529	0.8983	none	none	none	none	none	none
ENSMUSG00000062753	AI413582	none	129.859	0.231341	0.728302	69.3441	-0.071092	0.961577	81.4524	-0.00390781	0.997323	248.151	0.13759	0.693894	67.9631	0.0576164	0.971571	0.1379	0.5152	none	none	none	none	none	none
ENSMUSG00000074384	AI429214	none	10.0136	-0.318996	NA	13.0782	-0.137891	0.968072	8.75651	0.360043	0.980439	17.4945	-0.339969	0.678351	NA	NA	NA	0.5606	0.1077	none	none	none	none	none	none
ENSMUSG00000090086	AI480526	none	NA	NA	NA	NA	NA	NA	5.57244	-0.164675	0.994132	9.44089	0.154964	0.905643	NA	NA	NA	NA	NA	none	none	none	none	none	none
ENSMUSG00000105987	AI506816	none	NA	NA	NA	NA	NA	NA	13.9981	0.0236913	0.997028	71.839	1.66385	2.57285e-09	102.023	0.535569	0.416274	2.075	0.0001348	none	none	none	increasing	none	increasing
ENSMUSG00000078307	AI593442	none	734.657	-0.509108	0.0117188	695.535	-0.0166039	0.980844	485.093	-0.216595	0.78696	144.719	-0.355815	0.370013	18.2035	-0.597992	0.723993	-0.2857	0.04927	none	none	none	none	none	none
ENSMUSG00000010290	AI597479	none	121.154	-0.239071	0.737988	145.157	-0.26323	0.638072	139.864	-0.366687	0.676058	226.124	-0.242877	0.384161	63.6694	0.111859	0.939203	-0.04251	0.8164	none	none	none	none	none	none
ENSMUSG00000047423	AI837181	none	254.574	0.169666	0.729011	190.987	-0.293646	0.498591	116.907	0.0912887	0.991361	103.002	0.304758	0.366567	56.6525	0.187631	0.886967	0.01841	0.9381	none	none	none	none	none	none
ENSMUSG00000053297	AI854703	none	36.9631	0.477833	NA	23.3242	-0.315224	0.856321	27.7111	0.181742	0.988825	13.6275	-0.0535816	0.966483	NA	NA	NA	-0.4137	0.00297	none	none	none	none	none	none
ENSMUSG00000056383	AI987944	none	48.4639	-0.99884	NA	69.7662	-0.0214773	0.988396	46.8396	0.165116	0.984553	134.535	-0.0579571	0.895112	48.4162	0.628626	0.5088	0.1507	0.5634	none	none	none	none	none	none
ENSMUSG00000042901	Aida	none	17.6545	0.229968	NA	19.0462	0.315397	0.875807	14.9579	0.493182	0.939405	44.3142	0.121923	0.844527	12.1536	-0.387792	0.876859	0.1367	0.3997	none	none	none	none	none	none
ENSMUSG00000024397	Aif1	none	14.2722	2.64683	NA	6.90693	-0.983503	NA	5.90215	1.93427	0.445317	9.96622	1.04714	0.230734	2200.04	0.325878	0.41284	2.003	2.241e-34	none	none	none	none	none	increasing
ENSMUSG00000036932	Aifm1	none	132.814	-0.0195054	0.984539	174.402	0.110606	0.881466	138.276	0.109453	0.980439	83.2352	-0.203955	0.631412	49.0783	-0.0559084	0.977031	-0.2054	0.2122	none	none	none	none	none	none
ENSMUSG00000020085	Aifm2	none	13.4659	-0.147449	NA	4.22149	-1.33897	NA	15.4531	0.0634018	0.994132	40.6437	-0.0656353	0.927649	6.83339	-0.0396151	0.991725	0.2344	0.3195	none	none	none	none	none	none
ENSMUSG00000022763	Aifm3	none	185.693	0.305226	0.514736	51.9226	-0.438198	0.649251	95.4653	-0.277829	0.866408	186.982	-1.24563	1.71029e-06	11.7931	-1.6838	0.316841	-0.5776	0.01284	none	none	none	decreasing	none	none
ENSMUSG00000019806	Aig1	none	293.888	-0.048318	0.942364	228.988	-0.519372	0.0467034	452.08	-0.363692	0.365207	374.199	0.122565	0.723503	86.1874	0.438944	0.590503	-0.08853	0.6472	none	none	none	none	none	none
ENSMUSG00000037860	Aim2	none	3.99592	2.04798	NA	5.28375	0.311474	NA	NA	NA	NA	NA	NA	NA	118.706	0.93087	0.0523387	1.394	1.109e-13	none	none	none	none	none	increasing
ENSMUSG00000028029	Aimp1	none	341.203	-0.0655556	0.916147	524.609	-0.0184827	0.978576	365.059	-0.180716	0.86867	239.43	-0.631609	0.00178455	115.701	-0.0177743	0.989301	-0.1272	0.435	none	none	none	none	none	none
ENSMUSG00000029610	Aimp2	none	227.653	-0.0575742	0.937383	265.651	-0.0976845	0.877061	200.739	-0.145603	0.956332	146.772	-0.410895	0.152517	48.3406	0.427952	0.762497	-0.2343	0.194	none	none	none	none	none	none
ENSMUSG00000024847	Aip	none	460.428	0.443607	0.0773599	333.92	0.053082	0.942708	278.547	0.144053	0.9512	225.242	0.0702582	0.842756	139.152	0.0902301	0.930672	-0.216	0.2096	none	none	none	none	none	none
ENSMUSG00000039546	Ajap1	none	115.054	0.475282	0.395207	91.7246	0.103521	0.92687	52.1115	0.010468	0.997323	47.1132	0.13892	0.822713	9.84013	-1.83054	0.323695	-0.2746	0.04299	none	none	none	none	none	none
ENSMUSG00000029419	Ajm1	none	263.783	0.356593	0.348552	200.45	-0.153944	0.815519	151.027	-0.160824	0.964767	73.428	-0.335483	0.379879	17.7311	-0.558707	0.761693	NA	NA	none	none	none	none	none	none
ENSMUSG00000026817	Ak1	none	704.16	0.342821	0.168326	420.682	-0.358388	0.126656	454.984	0.0785346	0.98859	409.737	-0.210861	0.371323	192.048	0.606797	0.19559	-0.04223	0.8102	none	none	none	none	none	none
ENSMUSG00000078139	AK157302	none	NA	NA	NA	NA	NA	NA	4.45528	1.25858	0.861433	NA	NA	NA	NA	NA	NA	NA	NA	none	none	none	none	none	none
ENSMUSG00000028792	Ak2	none	72.2252	0.16167	NA	67.5633	0.0566876	0.970437	75.7441	0.10553	0.991399	143.61	0.64187	0.0086681	101.077	0.835761	0.138707	0.3226	0.0177	none	none	none	none	none	none
ENSMUSG00000024782	Ak3	none	188.813	-0.0347522	0.966046	153.429	-0.389134	0.331941	75.4889	0.153103	0.979472	1404.43	0.266203	0.28504	69.1606	0.306971	0.760564	0.671	1.005e-10	none	none	none	none	none	none
ENSMUSG00000028527	Ak4	none	42.7566	-0.130976	NA	112.509	-0.113542	0.917849	24.3127	0.383666	0.94491	63.5528	-1.38989	5.28777e-06	NA	NA	NA	-0.1002	0.5642	none	none	none	decreasing	none	none
ENSMUSG00000039058	Ak5	none	2000.51	0.155005	0.534596	2675.7	0.0435603	0.932925	132.18	-0.0650274	0.994132	246.129	-0.0987343	0.850704	41.4837	-2.31908	0.00160412	-0.1664	0.2524	none	none	none	none	decreasing+neuronal	none
ENSMUSG00000078941	Ak6	none	53.3139	-0.402076	NA	59.9001	-0.140745	0.917849	56.3468	-0.124991	0.991361	61.7511	-0.388646	0.309146	29.0607	0.566745	0.686225	NA	NA	none	none	none	none	none	none
ENSMUSG00000026807	Ak8	none	21.0203	0.969286	NA	12.8041	0.129668	0.968549	5.79152	0.126917	0.994132	8.60292	0.176792	0.89472	NA	NA	NA	0.413	0.3355	none	none	none	none	none	none
ENSMUSG00000018428	Akap1	none	178.207	-0.0536085	0.947181	266.245	-0.207315	0.625691	158.115	-0.259659	0.892104	165.36	-0.0942089	0.808022	73.3344	0.564147	0.459311	-0.235	0.04419	none	none	none	none	none	none
ENSMUSG00000047804	Akap10	none	253.193	-0.118838	0.825856	229.448	-0.0474786	0.956775	226.683	-0.0296393	0.994132	112.973	-0.302291	0.347998	75.7153	0.574972	0.44286	-0.09592	0.6687	none	none	none	none	none	none
ENSMUSG00000022016	Akap11	none	2442.98	-0.0364738	0.941395	4360.25	0.309632	0.0479902	1783.37	-0.0632551	0.991361	1675.34	0.0484551	0.871612	316.79	-0.910261	0.0164567	-0.003895	0.9867	none	none	none	none	none	none
ENSMUSG00000038587	Akap12	none	121.816	-0.0439694	0.965262	59.9096	-0.476943	0.62569	937.125	0.0678888	0.991361	75.7674	1.23082	7.99194e-06	39.9438	-1.11749	0.147295	-0.3797	0.03607	none	none	none	increasing	none	none
ENSMUSG00000066406	Akap13	none	92.4381	-0.0315415	NA	174.577	0.219954	0.67267	85.8308	-0.0470119	0.994132	138.138	0.357071	0.239754	572.59	0.189611	0.749679	0.03826	0.863	none	none	none	none	none	none
ENSMUSG00000059708	Akap17b	none	103.288	-0.469247	0.396256	92.3545	-0.0569526	0.96924	49.9903	0.103178	0.992723	25.143	-0.200587	0.790107	12.3503	-0.722395	0.746258	-0.2119	0.1664	none	none	none	none	none	none
ENSMUSG00000021057	Akap5	none	759.96	-0.48862	0.0138606	591.792	-0.403292	0.152821	87.3674	-0.679013	0.223748	179.512	-0.784218	0.00238298	80.2195	1.72281	0.00136198	-0.5525	1.228e-08	none	none	none	none	increasing	none
ENSMUSG00000061603	Akap6	none	3059.63	0.205437	0.476771	2265.46	0.176632	0.619724	1591.04	0.218489	0.665047	879.374	-0.362686	0.0900264	131.823	-2.72532	3.11719e-08	-0.4342	0.001092	none	none	none	none	decreasing+neuronal	none
ENSMUSG00000039166	Akap7	none	54.2862	-0.0785407	NA	34.6075	-0.158137	0.927249	64.2229	-0.203493	0.962425	83.4724	-0.213334	0.592188	35.3775	0.288442	0.860471	-0.2122	0.24	none	none	none	none	none	none
ENSMUSG00000024045	Akap8	none	86.8185	-0.056355	NA	105.622	-0.00296746	0.9975	67.5842	-0.192958	0.970586	30.6519	-0.0793137	0.920516	73.9477	0.241907	0.81853	-0.08566	0.5611	none	none	none	none	none	none
ENSMUSG00000002625	Akap8l	none	163.926	-0.270233	0.61631	193.163	0.30794	0.398677	60.8655	0.016263	0.995591	44.7015	-0.253201	0.638843	41.4026	-0.174178	0.913908	-0.2121	0.05618	none	none	none	none	none	none
ENSMUSG00000040407	Akap9	none	1072.76	-0.29939	0.160212	902.397	0.29671	0.20071	1198.93	-0.244656	0.62067	817.894	-0.261257	0.196189	301.911	-0.601997	0.121916	-0.013	0.9504	none	none	none	none	none	none
ENSMUSG00000031023	Akip1	none	NA	NA	NA	4.36255	0.60082	NA	NA	NA	NA	20.3759	0.794087	0.177961	35.7474	0.571954	0.62841	NA	NA	none	none	none	none	none	none
ENSMUSG00000023075	Akirin1	none	147.472	-0.0839085	0.924105	129.345	0.194994	0.81637	101.645	-0.194119	0.9512	170.473	0.0524139	0.902283	192.915	1.46689	0.000102421	0.1334	0.3344	none	none	none	none	increasing	none
ENSMUSG00000028291	Akirin2	none	429.786	-0.321695	0.41137	545.778	0.189143	0.63214	357.219	-0.160322	0.939405	369.447	-0.219533	0.402072	198.668	-0.0309226	0.979448	0.01634	0.9357	none	none	none	none	none	none
ENSMUSG00000028692	Akr1a1	none	1016.56	0.351908	0.10968	1000.47	0.00227831	0.997118	653.328	0.245656	0.832465	521.936	0.355666	0.0816281	805.789	1.04848	0.000655306	0.1151	0.4448	none	none	none	none	increasing	none
ENSMUSG00000061758	Akr1b10	none	43.7481	0.775619	NA	43.2813	0.461766	0.577695	58.6456	0.535047	0.524494	225.157	0.128779	0.704764	140.358	-0.642153	0.232473	0.4552	0.00193	none	none	none	none	none	none
ENSMUSG00000001642	Akr1b3	none	17.0715	0.83639	NA	11.5112	0.97702	NA	14.1346	0.246557	0.989253	9.59585	0.432723	0.690774	19.1104	0.67745	0.709442	0.1923	0.2505	none	none	none	none	none	none
ENSMUSG00000045410	Akr1e1	none	177.096	-0.0580098	0.948081	227.001	0.161672	0.762061	157.518	0.262947	0.826356	202.808	0.439469	0.070436	34.204	-0.131484	0.939897	0.1337	0.4998	none	none	none	none	none	none
ENSMUSG00000028743	Akr7a5	none	77.3295	0.558929	NA	44.4991	0.106537	0.948749	43.6708	-0.00436425	0.997356	73.4593	0.381725	0.312423	32.369	0.202008	0.906691	0.1411	0.5077	none	none	none	none	none	none
ENSMUSG00000001729	Akt1	none	241.869	0.0524295	0.942247	167.531	-0.267202	0.563329	164.051	-0.15943	0.957654	169.357	0.200797	0.557508	167.107	-0.136808	0.877773	-0.03065	0.8677	none	none	none	none	none	none
ENSMUSG00000011096	Akt1s1	none	86.2058	0.186611	NA	61.1417	0.0151821	0.991677	39.0575	0.139578	0.991361	95.6581	0.330267	0.33929	26.5174	-0.193588	0.917585	0.01518	0.9667	none	none	none	none	none	none
ENSMUSG00000004056	Akt2	none	72.9435	-0.138637	NA	31.4886	0.0277785	0.989189	16.3923	-0.0128378	0.997323	309.852	-0.556621	0.0113016	19.7278	-0.166754	0.940292	-0.4339	7.753e-06	none	none	none	none	none	none
ENSMUSG00000019699	Akt3	none	581.121	-0.366794	0.134534	788.96	-0.232175	0.342638	285.494	-0.363262	0.59843	279.619	-0.294313	0.250226	83.0813	0.253033	0.797072	-0.4741	2.031e-05	none	none	none	none	none	none
ENSMUSG00000031667	Aktip	none	269.653	0.120288	0.818323	186.648	0.0301002	0.977617	260.682	-0.171048	0.930477	552.036	0.484545	0.00943067	80.2303	-0.706514	0.262344	-0.04172	0.7879	none	none	none	none	none	none
ENSMUSG00000028393	Alad	none	163.858	-0.000860767	0.999806	113.493	-0.212294	0.759062	71.2013	0.112506	0.991361	69.9451	0.167999	0.72806	15.7511	0.0570688	0.98729	0.07902	0.7098	none	none	none	none	none	none
ENSMUSG00000032786	Alas1	none	592.032	0.238567	0.45907	668.608	0.223177	0.379518	414.632	0.245704	0.702568	245.783	0.0239169	0.956038	313.943	1.33879	3.93564e-05	0.1459	0.2565	none	none	none	none	increasing	none
ENSMUSG00000022636	Alcam	none	2545.17	-0.393134	0.0244909	1776.06	-0.66468	3.23524e-06	987.55	-0.58686	0.183932	3259.16	-0.720711	1.65966e-06	301.117	1.60067	4.80414e-07	-0.5928	1.317e-09	none	none	none	none	increasing	none
ENSMUSG00000007833	Aldh16a1	none	28.5824	0.516185	NA	13.9565	0.362509	0.889553	17.6891	0.568078	0.865134	14.1476	-0.108553	0.92208	46.0436	-0.526999	0.60166	0.6267	0.02016	none	none	none	none	none	none
ENSMUSG00000025007	Aldh18a1	none	163.311	0.123871	0.853339	130.084	0.114371	0.899293	190.36	0.0579063	0.993949	77.6581	0.308688	0.430752	57.5625	-0.0618931	0.9709	0.1856	0.2027	none	none	none	none	none	none
ENSMUSG00000053279	Aldh1a1	none	82.1496	0.568361	NA	21.4459	-0.00109733	0.999355	26.3482	0.915825	0.4438	3143.37	0.516684	0.00528219	37.9152	-0.694802	0.581008	1.328	2.347e-14	none	none	none	none	none	increasing
ENSMUSG00000013584	Aldh1a2	none	13.0764	0.574788	NA	NA	NA	NA	NA	NA	NA	7.59887	-0.49667	0.684861	NA	NA	NA	0.2761	0.5661	none	none	none	none	none	none
ENSMUSG00000015134	Aldh1a3	none	5.66852	-0.646927	NA	NA	NA	NA	6.56957	0.539897	0.970586	NA	NA	NA	NA	NA	NA	-1.051	0.03384	none	none	none	none	none	decreasing
ENSMUSG00000024747	Aldh1a7	none	4.47211	0.258395	NA	NA	NA	NA	NA	NA	NA	4.16794	-0.521604	0.758283	NA	NA	NA	NA	NA	none	none	none	none	none	none
ENSMUSG00000035561	Aldh1b1	none	53.7148	0.611971	NA	97.5539	0.125271	0.899454	15.7313	-0.206051	0.991361	17.0919	1.50862	0.0129749	10.2501	0.546414	0.850128	0.1435	0.5982	none	none	none	increasing	none	none
ENSMUSG00000030088	Aldh1l1	none	131.583	0.485089	0.368139	10.7276	0.962962	NA	19.2391	0.540453	0.890571	1329.14	0.113638	0.635498	28.9467	-0.741354	0.53135	1.413	1.177e-57	none	none	none	none	none	increasing
ENSMUSG00000029455	Aldh2	none	255.691	-0.0590935	0.930169	334.752	-0.524749	0.0364971	91.5207	0.124039	0.989253	543.388	-0.62896	0.00054214	231.267	0.0361627	0.975652	0.04249	0.8426	none	none	none	none	none	none
ENSMUSG00000019102	Aldh3a1	none	13.1147	-0.799062	NA	4.52338	-1.31529	NA	5.16281	-0.294865	0.992723	NA	NA	NA	NA	NA	NA	0.03519	0.9662	none	none	none	none	none	none
ENSMUSG00000010025	Aldh3a2	none	324.443	-0.0551428	0.937383	331.455	-0.0894647	0.878694	192.298	0.430741	0.337993	190.498	0.183568	0.555488	140.006	-0.214113	0.802352	0.05114	0.7471	none	none	none	none	none	none
ENSMUSG00000024885	Aldh3b1	none	4.63724	0.687502	NA	NA	NA	NA	NA	NA	NA	30.7089	1.75699	2.90687e-05	27.3492	0.639894	0.630162	1.559	8.551e-15	none	none	none	increasing	none	increasing
ENSMUSG00000075296	Aldh3b2	none	NA	NA	NA	NA	NA	NA	NA	NA	NA	NA	NA	NA	NA	NA	NA	-0.0219	0.9797	none	none	none	none	none	none
ENSMUSG00000028737	Aldh4a1	none	4.3846	0.0994627	NA	4.5183	0.619194	NA	NA	NA	NA	19.4629	0.111623	0.903729	NA	NA	NA	0.1635	0.2869	none	none	none	none	none	none
ENSMUSG00000035936	Aldh5a1	none	207.822	0.0748082	0.918333	251.999	-0.131696	0.826403	330.768	0.0383522	0.994132	357.562	-0.495543	0.0117237	27.4157	-1.63681	0.0865105	-0.3902	0.0001165	none	none	none	none	none	none
ENSMUSG00000021238	Aldh6a1	none	191.945	0.206811	0.700389	184.267	-0.156354	0.811341	147.451	-0.0216055	0.994132	1743.5	-0.505585	0.0307531	128.065	-0.115036	0.911306	0.2558	0.02841	none	none	none	none	none	none
ENSMUSG00000053644	Aldh7a1	none	222.75	-0.1472	0.805384	197.06	-0.0236803	0.980844	144.13	-0.0937287	0.98964	1222.23	-0.302715	0.155033	74.1263	-0.229707	0.828936	0.173	0.1175	none	none	none	none	none	none
ENSMUSG00000026687	Aldh9a1	none	86.4395	0.355038	NA	85.0386	0.170777	0.871423	101.623	0.252454	0.886796	256.48	-0.579001	0.00338391	119.361	-0.430174	0.554909	-0.1419	0.3588	none	none	none	none	none	none
ENSMUSG00000030695	Aldoa	none	9378.3	0.356487	0.0259903	7312.66	0.0524416	0.923923	4638.04	0.18446	0.871485	2411.41	-0.239029	0.221006	1060.87	0.372764	0.359282	-0.01958	0.9502	none	none	none	none	none	none
ENSMUSG00000059343	Aldoart1	none	5.19128	2.31189	NA	10.8005	-0.810533	NA	4.5942	-0.086496	0.994132	NA	NA	NA	NA	NA	NA	0.4284	NA	none	none	none	none	none	none
ENSMUSG00000017390	Aldoc	none	957.116	0.679041	6.25621e-05	198.513	-0.343794	0.893084	7615.36	0.174346	0.836211	16976.3	-0.309664	0.132173	383.918	-1.38095	0.000688765	0.4048	0.01331	none	none	none	none	decreasing+neuronal	none
ENSMUSG00000039427	Alg1	none	137.178	0.0997392	0.900583	158.107	-0.267432	0.58107	104.469	-0.126092	0.979024	169.01	-0.18455	0.629677	89.9208	0.120277	0.916006	-0.05621	0.7831	none	none	none	none	none	none
ENSMUSG00000075470	Alg10b	none	192.262	-0.542996	0.162879	318.483	0.0316158	0.96924	199.087	-0.16187	0.970586	312.61	-0.477088	0.0517334	57.3552	0.80985	0.274982	-0.02274	0.9081	none	none	none	none	none	none
ENSMUSG00000063362	Alg11	none	185.398	-0.2445	0.651128	256.422	-0.129016	0.828962	219.173	-0.103683	0.979472	227.567	-0.125629	0.680844	75.3396	0.364862	0.685948	-0.3806	0.002491	none	none	none	none	none	none
ENSMUSG00000035845	Alg12	none	32.7736	-0.157811	NA	24.8099	-0.392393	0.789096	49.6356	-0.222742	0.958938	73.6073	-0.516403	0.131095	34.7432	-0.099581	0.958012	0.02135	0.9359	none	none	none	none	none	none
ENSMUSG00000041718	Alg13	none	31.2767	-0.693442	NA	26.9062	0.0612138	0.978534	27.366	0.196422	0.983338	38.7515	-0.0450538	0.950726	15.203	0.77685	0.691594	0.1205	0.6905	none	none	none	none	none	none
ENSMUSG00000039887	Alg14	none	33.1136	0.0470958	NA	28.7905	-0.568221	0.5751	28.7974	-0.144699	0.991399	111.725	0.350425	0.341841	30.6828	-0.348908	0.822427	0.3179	0.1503	none	none	none	none	none	none
ENSMUSG00000039740	Alg2	none	871.639	0.0436573	0.92683	1127.22	-0.199144	0.422824	535.692	0.122509	0.950864	380.4	0.129304	0.659455	91.1405	-0.712198	0.280426	-0.2166	0.05077	none	none	none	none	none	none
ENSMUSG00000033809	Alg3	none	44.8189	0.0945442	NA	38.6861	-0.470282	0.594269	60.5516	-0.530326	0.530843	126.264	-0.229927	0.518071	45.7342	0.25799	0.84835	0.03521	0.9048	none	none	none	none	none	none
ENSMUSG00000036632	Alg5	none	86.9052	-0.0397063	NA	111.231	0.288276	0.608871	70.3634	0.0106076	0.997183	225.484	0.516479	0.0144622	162.514	0.978915	0.0169335	0.2189	0.2203	none	none	none	none	none	none
ENSMUSG00000073792	Alg6	none	63.8059	-0.0800683	NA	82.4319	-0.0164219	0.990295	86.8405	-0.216305	0.957654	109.147	-0.980589	0.000104187	46.9445	0.427585	0.698139	0.1316	0.5258	none	none	none	none	none	none
ENSMUSG00000035704	Alg8	none	47.3557	-0.291178	NA	42.4029	-0.435428	0.622474	33.028	-0.390096	0.898802	106.264	-0.17127	0.682295	83.4509	0.364398	0.671566	0.1401	0.5844	none	none	none	none	none	none
ENSMUSG00000032059	Alg9	none	114.838	-0.297245	0.639404	133.747	-0.384495	0.364206	100.885	-0.357785	0.755232	144.992	-0.558329	0.0489198	50.7341	0.422748	0.690023	-0.1836	0.2923	none	none	none	none	none	none
ENSMUSG00000055471	Alk	none	29.8857	-0.465253	NA	27.8471	0.0897979	0.96915	101.863	-0.335815	0.832465	24.8181	-0.0078343	0.992196	8.07475	-1.24132	0.596232	-0.6498	0.004599	none	none	none	none	none	none
ENSMUSG00000054204	Alkal2	none	8.45797	-0.0610121	NA	4.11466	0.50805	NA	15.7207	-0.205999	0.991361	5.27166	0.844343	0.524017	NA	NA	NA	NA	NA	none	none	none	none	none	none
ENSMUSG00000079036	Alkbh1	none	39.3263	0.0755114	NA	42.9093	0.133392	0.935461	27.8758	-0.377322	0.936002	22.7692	-0.0323742	0.97452	8.63753	0.214197	0.953533	-0.1099	0.6367	none	none	none	none	none	none
ENSMUSG00000044339	Alkbh2	none	9.25553	-0.436095	NA	7.23112	0.384864	NA	5.82207	-0.465162	0.979024	7.70441	0.554643	0.641882	9.99953	2.13132	0.223545	-0.03684	0.9405	none	none	none	none	none	none
ENSMUSG00000040174	Alkbh3	none	33.7556	0.239311	NA	20.5367	0.550679	0.736609	44.1643	0.0221088	0.995591	37.6708	0.830298	0.0607998	32.6554	1.15692	0.209813	0.4493	0.00859	none	none	none	none	none	none
ENSMUSG00000039754	Alkbh4	none	16.1387	0.344391	NA	15.7837	-0.142327	0.961151	17.0175	-0.222594	0.989253	11.65	0.116336	0.924537	9.89623	-0.0290534	0.992081	0.1545	0.6925	none	none	none	none	none	none
ENSMUSG00000042650	Alkbh5	none	145.424	0.216968	0.743692	79.1921	0.067432	0.961151	120.546	-0.0732672	0.992723	194.522	0.10207	0.792844	78.5731	0.479046	0.547275	-0.05413	0.7087	none	none	none	none	none	none
ENSMUSG00000042831	Alkbh6	none	101.712	-0.0469552	0.964324	85.9924	-0.32369	0.671423	88.3913	0.212197	0.956332	66.9623	-0.375035	0.315481	26.4028	0.622105	0.651054	-0.1298	0.4994	none	none	none	none	none	none
ENSMUSG00000002661	Alkbh7	none	73.4021	-0.150937	NA	52.7155	-0.210988	0.856321	83.5355	-0.236289	0.939405	69.8315	-0.651345	0.0506424	18.9628	0.407619	0.831454	-0.1069	0.7752	none	none	none	none	none	none
ENSMUSG00000025899	Alkbh8	none	199.651	-0.306197	0.514417	225.225	0.0484608	0.956848	116.092	-0.124809	0.979472	119.618	-0.0341845	0.942071	27.106	0.00714775	0.997014	0.1374	0.619	none	none	none	none	none	none
ENSMUSG00000063810	Alms1	none	76.6212	0.173707	NA	52.2276	0.192523	0.884031	160.934	-0.118886	0.979024	56.8007	-0.943392	0.00888917	20.9181	-0.885172	0.542935	-0.02945	0.9395	none	none	none	none	none	none
ENSMUSG00000032807	Alox12b	none	40.9507	0.201467	NA	74.6645	-0.421319	0.480434	NA	NA	NA	6.314	-0.863999	0.473665	NA	NA	NA	-0.5062	0.01465	none	none	none	none	none	none
ENSMUSG00000060063	Alox5ap	none	8.53676	0.997011	NA	4.65667	-0.287729	NA	10.3692	0.418765	0.972545	4.63829	1.00366	0.467757	394.378	-1.04999	0.000276623	0.9118	0.0001381	none	none	none	none	decreasing	none
ENSMUSG00000020891	Alox8	none	21.0777	0.422928	NA	27.7832	-0.327935	0.820486	39.3563	0.468144	0.79272	10.7348	-0.407831	0.699823	NA	NA	NA	-0.3853	0.09427	none	none	none	none	none	none
ENSMUSG00000020892	Aloxe3	none	26.688	0.414518	NA	33.5488	-0.231844	0.881738	8.55805	0.40666	0.977956	9.61562	0.374937	0.760692	NA	NA	NA	0.04451	0.9143	none	none	none	none	none	none
ENSMUSG00000028028	Alpk1	none	NA	NA	NA	7.60862	0.651541	NA	NA	NA	NA	27.1131	-0.61646	0.267771	13.4982	1.28113	0.458422	0.447	0.01259	none	none	none	none	none	none
ENSMUSG00000028766	Alpl	none	8.62379	1.52413	NA	NA	NA	NA	4.74909	1.01373	0.897824	238.564	-1.28647	7.1488e-09	7.61138	-1.23873	0.622192	-0.9876	0.0009534	none	none	none	decreasing	none	none
ENSMUSG00000026024	Als2	none	266.603	0.137086	0.794363	340.93	0.202814	0.574133	283.954	-0.451348	0.22432	200.822	-0.262352	0.341182	71.7567	-0.170935	0.884128	-0.2325	0.05752	none	none	none	none	none	none
ENSMUSG00000025134	Alyref	none	183.01	0.18644	0.740731	202.076	-0.175786	0.782212	135.763	-0.120161	0.977729	138.112	-0.233849	0.460284	91.3754	-0.479818	0.521009	-0.01427	0.9623	none	none	none	none	none	none
ENSMUSG00000060244	Alyref2	none	22.1282	0.083015	NA	28.1014	0.4564	0.706867	19.8917	0.527907	0.887528	27.5299	-0.33882	0.615895	20.9084	0.200727	0.927126	0.1925	0.6867	none	none	none	none	none	none
ENSMUSG00000022244	Amacr	none	57.5922	-0.0584051	NA	76.7576	-0.255084	0.762831	37.7812	-0.043518	0.994132	58.8797	-0.158745	0.751008	12.9236	0.35337	0.894741	0.05733	0.8549	none	none	none	none	none	none
ENSMUSG00000040506	Ambra1	none	456.542	0.418978	0.127868	458.51	0.262301	0.488971	203.799	0.273272	0.731814	136.458	-0.0315464	0.947411	88.188	-0.498183	0.487694	-0.03037	0.8412	none	none	none	none	none	none
ENSMUSG00000036820	Amdhd2	none	30.3041	0.516716	NA	28.495	0.132246	0.948749	18.6479	0.103948	0.994132	22.4384	0.112776	0.896884	48.7317	1.1099	0.132315	0.5228	0.008623	none	none	none	none	none	none
ENSMUSG00000050332	Amer1	none	32.5307	-0.415729	NA	25.0395	-0.351886	0.818818	31.4605	-0.127848	0.992723	11.381	-0.294787	0.785943	6.38233	0.282763	0.941659	NA	NA	none	none	none	none	none	none
ENSMUSG00000021986	Amer2	none	177.982	0.282841	0.583168	158.616	-0.0874793	0.929812	114.875	-0.48195	0.4438	281.385	-1.13208	1.4312e-10	9.95071	-0.429142	0.87712	NA	NA	none	none	none	decreasing	none	none
ENSMUSG00000045174	Amer3	none	248.443	0.0407659	0.957086	298.603	0.214665	0.565627	74.7398	0.12554	0.988891	33.1662	0.052467	0.954444	5.62973	-3.01225	0.156495	NA	NA	none	none	none	none	none	none
ENSMUSG00000031751	Amfr	none	1006.02	-0.0726943	0.843034	1009.76	-0.162347	0.603891	1044.46	-0.25175	0.67799	2798.94	-0.195025	0.455248	512.173	-0.0478419	0.953292	0.02872	0.8639	none	none	none	none	none	none
ENSMUSG00000050947	Amigo1	none	353.682	-0.0455077	0.942148	259.087	-0.236332	0.547711	356.77	-0.248095	0.712637	253.159	-0.921728	1.43061e-06	26.1132	-1.90446	0.0367841	-0.5509	2.202e-09	none	none	none	none	decreasing+neuronal	none
ENSMUSG00000048218	Amigo2	none	24.52	-0.0123347	NA	63.2295	-0.0150541	0.991677	37.0438	0.0454484	0.994132	199.392	-0.369081	0.215558	NA	NA	NA	-0.2011	0.1804	none	none	none	none	none	none
ENSMUSG00000042225	Ammecr1	none	NA	NA	NA	NA	NA	NA	NA	NA	NA	3.24524	1.47249	0.378389	5.31852	0.123886	0.98205	0.1883	0.6989	none	none	none	none	none	none
ENSMUSG00000041915	Ammecr1l	none	74.3467	-0.0928008	NA	62.9916	-0.0600762	0.968714	78.8228	-0.0201136	0.99529	127.805	-0.0060685	0.990114	41.2676	0.735061	0.445658	0.07024	0.6788	none	none	none	none	none	none
ENSMUSG00000021278	Amn	none	27.3775	-0.357104	NA	9.00722	-0.289794	NA	5.45989	-0.344803	0.991361	NA	NA	NA	NA	NA	NA	0.1282	0.8562	none	none	none	none	none	none
ENSMUSG00000068250	Amn1	none	130.264	-0.563842	0.250038	162.699	0.0340826	0.976808	96.412	0.306746	0.882106	187.549	-0.0143411	0.977499	18.5899	0.491562	0.818054	0.04304	0.8993	none	none	none	none	none	none
ENSMUSG00000041688	Amot	none	60.0161	-0.150161	NA	55.6596	-0.0229378	0.988451	82.9522	-0.518436	0.475115	305.583	-0.561388	0.00411962	12.1435	-2.82801	0.027829	0.03605	0.8473	none	none	none	none	decreasing+neuronal	none
ENSMUSG00000013076	Amotl1	none	49.8051	0.222608	NA	6.0953	-0.0187016	NA	47.4344	0.381808	0.864213	197.591	0.894809	3.96139e-05	52.2283	-0.161787	0.907029	0.757	1.027e-10	none	none	none	none	none	none
ENSMUSG00000032531	Amotl2	none	32.3747	-0.251193	NA	5.43971	-0.220201	NA	37.0284	0.375276	0.908037	48.5218	0.277403	0.580998	9.10826	-2.43102	0.163097	0.7113	3.377e-05	none	none	none	none	none	none
ENSMUSG00000027889	Ampd2	none	262.043	-0.160074	0.749567	501.008	0.498459	0.0157503	156.349	0.280655	0.792591	113.412	-0.343269	0.26675	42.5467	-0.561034	0.60166	-0.01616	0.9305	none	none	none	none	none	none
ENSMUSG00000005686	Ampd3	none	47.6474	0.0555462	NA	24.7213	0.0119515	0.995162	62.8603	0.284526	0.918876	238.279	1.49129	8.34685e-14	34.8483	-0.8619	0.384718	1.23	4.19e-26	none	none	none	increasing	none	increasing
ENSMUSG00000021314	Amph	none	2192.63	0.0995366	0.726376	2390.14	0.0658771	0.864283	1294.57	-0.0512392	0.991361	396.018	-0.312625	0.209591	45.0737	-1.42254	0.0342583	-0.2147	0.1085	none	none	none	none	decreasing+neuronal	none
ENSMUSG00000032607	Amt	none	36.1566	0.367574	NA	7.58182	0.678265	NA	12.5836	0.206869	0.992723	221.444	-0.266138	0.355021	NA	NA	NA	-0.03758	0.884	none	none	none	none	none	none
ENSMUSG00000050022	Amz1	none	32.589	1.11941	NA	10.6415	-0.320191	NA	5.58359	0.277033	0.993124	20.0266	0.893294	0.138633	56.0368	1.14113	0.100138	1.103	4.972e-09	none	none	none	none	none	increasing
ENSMUSG00000020610	Amz2	none	138.891	-0.097132	0.90307	196.133	0.0266615	0.9775	87.6991	-0.157424	0.977729	116.817	0.0472545	0.92297	33.7737	0.895907	0.379242	-0.2754	0.01752	none	none	none	none	none	none
ENSMUSG00000014355	Anapc1	none	475.416	0.198473	0.60189	828.6	0.402731	0.0192309	378.424	0.23128	0.749678	407.91	-0.0290505	0.938023	142.552	-0.531942	0.32442	-0.02359	0.897	none	none	none	none	none	none
ENSMUSG00000036977	Anapc10	none	87.6933	0.145058	NA	110.769	0.0266561	0.982131	98.5833	0.0937439	0.992723	153.125	0.25044	0.443006	36.9764	0.35293	0.8027	0.05749	0.8671	none	none	none	none	none	none
ENSMUSG00000025135	Anapc11	none	281.546	0.140816	0.779228	222.78	0.0114836	0.99014	230.36	-0.0351788	0.994132	381.213	0.0924254	0.77662	150.997	-0.0962907	0.919673	-0.05668	0.7938	none	none	none	none	none	none
ENSMUSG00000035048	Anapc13	none	87.8481	0.421295	NA	68.7844	-0.128559	0.921673	122.145	-0.0659104	0.994132	259.699	0.380924	0.105707	149.598	0.467275	0.463717	-0.1667	0.4686	none	none	none	none	none	none
ENSMUSG00000030649	Anapc15	none	23.7215	-0.294204	NA	12.2088	-0.212101	0.945399	12.8909	0.501494	0.947673	23.3471	0.741971	0.176498	19.8964	0.141501	0.955994	NA	NA	none	none	none	none	none	none
ENSMUSG00000020107	Anapc16	none	122.878	0.125488	0.869864	142.358	-0.357676	0.446867	84.8279	-0.0240834	0.994132	236.74	-0.262266	0.322997	72.1795	0.151664	0.903629	-0.03997	0.8327	none	none	none	none	none	none
ENSMUSG00000026965	Anapc2	none	618.285	0.147021	0.696613	496.211	-0.0531732	0.933997	357.784	0.244968	0.798348	387.565	0.164746	0.523878	190.049	0.107988	0.913551	-0.04818	0.7422	none	none	none	none	none	none
ENSMUSG00000029176	Anapc4	none	486.657	-0.0125387	0.9845	726.884	0.243897	0.344535	501.537	0.0272342	0.994132	462.336	0.333246	0.255039	178.767	-0.0226591	0.986757	0.00879	0.9645	none	none	none	none	none	none
ENSMUSG00000029472	Anapc5	none	480.044	-0.0409386	0.946696	416.49	-0.0885188	0.884031	236.597	-0.0524074	0.994132	351.863	0.100858	0.741425	132.638	-0.111566	0.909126	-0.1945	0.1148	none	none	none	none	none	none
ENSMUSG00000029466	Anapc7	none	341.8	0.280145	0.442135	317.537	0.0430365	0.959134	170.519	-0.0132647	0.995591	112.585	0.0270301	0.960727	62.5502	0.260641	0.819199	0.02255	0.908	none	none	none	none	none	none
ENSMUSG00000021257	Angel1	none	35.5845	0.339997	NA	30.0018	-0.0249396	0.990609	32.727	0.379338	0.909747	38.1178	0.403393	0.448373	14.352	-0.63027	0.747606	0.02823	0.9194	none	none	none	none	none	none
ENSMUSG00000026634	Angel2	none	118.989	0.0155594	0.989708	143.814	0.0662242	0.945399	54.8163	-0.181698	0.974617	90.6664	0.252756	0.492088	49.9203	0.197762	0.886015	0.05388	0.7398	none	none	none	none	none	none
ENSMUSG00000022309	Angpt1	none	51.4485	0.17227	NA	10.8659	-1.70234	NA	23.1053	-0.431063	0.932376	541.1	1.06602	3.42444e-09	5.53086	0.0457735	0.991725	1.91	1.135e-24	none	none	none	increasing	none	increasing
ENSMUSG00000033544	Angptl1	none	NA	NA	NA	6.38849	1.19762	NA	6.38525	0.586618	0.957669	28.3873	1.74729	0.000477013	NA	NA	NA	0.6197	0.09527	none	none	none	increasing	none	none
ENSMUSG00000038742	Angptl6	none	28.097	-0.106971	NA	27.2938	-0.203741	0.923923	6.05179	-0.172515	0.994132	22.0217	-0.327261	0.644893	5.07819	-0.0520128	0.991725	-0.4156	0.1881	none	none	none	none	none	none
ENSMUSG00000022265	Ank	none	1004.91	-0.0390967	0.937383	596.479	-0.162869	0.638528	574.608	0.00728314	0.995591	1212.7	0.511886	0.00540808	334.891	2.27191	5.76423e-14	0.04984	0.7538	none	none	none	none	increasing	none
ENSMUSG00000031543	Ank1	none	135.916	0.0858825	0.91819	80.0609	-0.465738	0.503883	1805.48	-0.395025	0.179647	76.698	-0.228197	0.566113	52.652	-2.23214	0.000196593	-0.6502	4.486e-06	none	none	none	none	decreasing+neuronal	none
ENSMUSG00000032826	Ank2	none	4478.43	0.0623573	0.84021	4815.18	-0.0341049	0.958821	6823.07	-0.0970122	0.957654	4427.86	-0.691596	1.64459e-05	381.664	-1.41905	6.26013e-05	-0.04659	0.8381	none	none	none	none	decreasing+neuronal	none
ENSMUSG00000069601	Ank3	none	2459.15	0.100124	0.731847	2706.87	0.126827	0.782379	2721.51	-0.131234	0.922347	517.406	-0.382409	0.0677905	175.381	-2.14991	4.99681e-07	-0.2929	0.0256	none	none	none	none	decreasing+neuronal	none
ENSMUSG00000066510	Ankdd1a	none	6.69888	-0.301431	NA	9.04367	0.348757	NA	NA	NA	NA	NA	NA	NA	NA	NA	NA	NA	NA	none	none	none	none	none	none
ENSMUSG00000047773	Ankfn1	none	73.4512	-0.119166	NA	3.94443	0.793428	NA	17.2467	-0.156326	0.994132	17.6261	-0.406699	0.593283	NA	NA	NA	0.8917	0.1048	none	none	none	none	none	none
ENSMUSG00000020790	Ankfy1	none	254.643	0.113255	0.835738	301.246	0.0162935	0.983695	122.703	-0.0726977	0.992723	308.504	-0.015333	0.971511	271.447	-0.118388	0.888703	0.1018	0.4584	none	none	none	none	none	none
ENSMUSG00000024483	Ankhd1	none	527.744	-0.168188	0.653569	607.144	0.0274169	0.970437	525.55	-0.0467472	0.992897	286.443	-0.672313	0.00201935	194.509	-0.0836303	0.924853	0.02625	0.9086	none	none	none	none	none	none
ENSMUSG00000040351	Ankib1	none	145.676	0.222818	0.710689	175.798	0.412876	0.225897	78.437	0.236839	0.939405	262.276	0.239282	0.438247	64.1538	-0.0641028	0.967458	0.05252	0.7426	none	none	none	none	none	none
ENSMUSG00000029501	Ankle2	none	327.417	-0.152223	0.746834	463.353	-0.0583475	0.926634	231.14	-0.118032	0.965574	421.652	-0.11972	0.655799	302.436	0.52741	0.184826	0.1414	0.3509	none	none	none	none	none	none
ENSMUSG00000036188	Ankmy2	none	489.377	0.1729	0.668466	617.431	0.270652	0.320144	316.972	0.0327114	0.994132	126.77	-0.430893	0.12797	45.47	-0.230924	0.868823	-0.1781	0.2039	none	none	none	none	none	none
ENSMUSG00000021661	Ankra2	none	194.832	-0.0376312	0.962813	241.129	0.0284189	0.976808	76.2029	0.302211	0.878819	231.813	0.388789	0.117489	49.2614	-0.0630485	0.973735	0.05219	0.7822	none	none	none	none	none	none
ENSMUSG00000031508	Ankrd10	none	40.3567	0.276008	NA	70.1031	-0.00310253	0.997825	30.1799	0.0371576	0.994132	24.1188	0.0500639	0.956353	26.9702	0.290999	0.870283	-0.2033	0.1385	none	none	none	none	none	none
ENSMUSG00000035569	Ankrd11	none	579.229	-0.121424	0.76026	572.302	-0.0808235	0.880744	189.871	-0.229328	0.846278	168.12	-0.252499	0.392838	98.6078	-0.224856	0.814093	-0.03535	0.8447	none	none	none	none	none	none
ENSMUSG00000034647	Ankrd12	none	821.765	-0.532411	0.0041009	918.025	-0.0378441	0.959607	421.786	-0.0151956	0.994132	168.828	-0.342344	0.185117	67.6609	0.678646	0.363663	0.1159	0.5022	none	none	none	none	none	none
ENSMUSG00000041870	Ankrd13a	none	38.4902	0.556533	NA	39.4424	-0.125037	0.942708	86.3532	0.167486	0.973802	86.8715	1.29912	8.1615e-07	233.001	0.157155	0.838479	0.7413	3.715e-09	none	none	none	increasing	none	none
ENSMUSG00000037907	Ankrd13b	none	97.8359	0.0891327	0.933637	94.9463	0.138104	0.881738	25.6446	0.241875	0.977753	24.623	0.206319	0.779578	NA	NA	NA	-0.1783	0.1889	none	none	none	none	none	none
ENSMUSG00000039988	Ankrd13c	none	229.69	-0.388359	0.355678	271.731	0.251938	0.481968	153.676	-0.105779	0.983338	297.16	-0.145903	0.610528	47.0793	0.380476	0.748709	-0.1525	0.2873	none	none	none	none	none	none
ENSMUSG00000005986	Ankrd13d	none	179.666	0.217406	0.695168	88.4671	-0.0691988	0.958821	83.6984	0.0489757	0.994132	46.2464	0.124772	0.841265	14.451	-1.00958	0.564365	-0.272	0.02947	none	none	none	none	none	none
ENSMUSG00000047909	Ankrd16	none	30.1968	0.245361	NA	24.8443	0.531159	0.694223	13.4427	0.312657	0.979195	13.4528	-0.346913	0.713506	7.53213	-0.1135	0.980161	0.3664	0.02986	none	none	none	none	none	none
ENSMUSG00000055204	Ankrd17	none	1201.4	-0.118466	0.71501	1224.24	0.0134846	0.982131	993.762	-0.0439785	0.992723	603.217	-0.690104	3.86138e-05	225.487	-0.0585829	0.95414	-0.1496	0.3391	none	none	none	none	none	none
ENSMUSG00000054708	Ankrd24	none	99.1269	0.0264746	0.982138	47.4698	-0.42331	0.630788	75.4969	-0.296764	0.908037	37.633	-0.333117	0.520319	14.0903	-0.290929	0.907727	-0.267	0.1367	none	none	none	none	none	none
ENSMUSG00000007827	Ankrd26	none	161.376	-0.285086	0.60091	128.594	-0.0066586	0.994613	161.099	0.0414178	0.994132	77.7163	-0.785746	0.0103311	39.7495	-0.169421	0.918751	0.007644	0.9801	none	none	none	none	none	none
ENSMUSG00000034867	Ankrd27	none	86.7694	0.135312	NA	71.6971	-0.472583	0.407626	33.8051	0.0917521	0.994132	71.4731	-0.200148	0.652128	31.4214	-0.288552	0.849107	-0.0999	0.4945	none	none	none	none	none	none
ENSMUSG00000014496	Ankrd28	none	379.384	-0.0965136	0.85571	351.322	0.407878	0.0727328	118.593	0.0813046	0.991399	314.03	0.631319	0.000562957	39.3984	0.624866	0.551419	0.442	2.157e-05	none	none	none	none	none	none
ENSMUSG00000057766	Ankrd29	none	61.3951	-0.190505	NA	85.2951	-0.458801	0.349957	138.94	-0.0532151	0.994132	92.2275	-0.214389	0.578093	NA	NA	NA	-0.3576	0.0216	none	none	none	none	none	none
ENSMUSG00000109561	Ankrd31	none	NA	NA	NA	NA	NA	NA	NA	NA	NA	NA	NA	NA	NA	NA	NA	NA	NA	none	none	none	none	none	none
ENSMUSG00000022237	Ankrd33b	none	213.613	0.365634	0.375883	149.809	0.229094	0.703346	36.7395	0.313364	0.939405	46.715	0.0650255	0.928479	10.6022	-1.18352	0.524693	-0.1663	0.1796	none	none	none	none	none	none
ENSMUSG00000049097	Ankrd34a	none	277.555	0.046047	0.946876	196.539	-0.18644	0.753491	89.3878	-0.211129	0.940099	49.5775	-0.431983	0.332785	NA	NA	NA	-0.4852	0.0008058	none	none	none	none	none	none
ENSMUSG00000045034	Ankrd34b	none	151.235	-0.284091	0.620757	83.228	-0.269587	0.719946	433.397	-0.115841	0.958839	53.899	-0.649104	0.0839938	8.05786	-0.407131	0.897864	-0.5698	0.001769	none	none	none	none	none	none
ENSMUSG00000047606	Ankrd34c	none	152.381	-0.585554	0.186284	21.456	-1.19742	0.204799	95.5826	-0.154259	0.972545	19.6623	0.0459792	0.966483	NA	NA	NA	-1.375	0.004042	none	none	none	none	none	decreasing
ENSMUSG00000038354	Ankrd35	none	54.454	-0.0561998	NA	40.2197	-0.124358	0.941077	20.0314	-0.00618997	0.997356	20.1895	-0.394676	0.59509	NA	NA	NA	0.05384	0.8431	none	none	none	none	none	none
ENSMUSG00000050914	Ankrd37	none	25.8706	-0.706243	NA	20.4134	-0.658884	0.619781	12.474	-0.293729	0.980439	11.0772	-0.201144	0.858306	4.23169	-0.218748	0.968807	-0.4679	0.2165	none	none	none	none	none	none
ENSMUSG00000079610	Ankrd39	none	12.0166	0.0549466	NA	5.12166	-0.332751	NA	6.69651	0.548748	0.962425	13.2003	0.973525	0.198263	7.85168	1.05373	0.676327	0.1874	0.463	none	none	none	none	none	none
ENSMUSG00000020864	Ankrd40	none	113.896	-0.130675	0.869558	88.7645	-0.352758	0.569708	150.598	-0.304784	0.751898	476.259	-0.23675	0.435446	85.5885	0.304215	0.737973	0.1623	0.1786	none	none	none	none	none	none
ENSMUSG00000041343	Ankrd42	none	69.5427	0.183153	NA	30.8921	-0.0856478	0.970437	35.3069	-0.00334105	0.997896	37.4942	0.262747	0.644494	NA	NA	NA	0.0243	0.9369	none	none	none	none	none	none
ENSMUSG00000052331	Ankrd44	none	45.9277	0.501905	NA	18.7423	-0.691396	0.661587	27.5498	0.766265	0.523358	40.5544	0.376062	0.440478	301.874	-0.252224	0.714724	0.6892	3.956e-06	none	none	none	none	none	none
ENSMUSG00000044835	Ankrd45	none	262.582	-0.189577	0.698422	197.756	-0.216616	0.638279	125.653	-0.169939	0.957654	88.6519	-0.0696397	0.893975	NA	NA	NA	-0.3687	0.004875	none	none	none	none	none	none
ENSMUSG00000048307	Ankrd46	none	1043.73	0.0201882	0.966086	1391.27	0.0621548	0.914378	532.864	0.145275	0.920672	424.16	-0.0458675	0.899131	75.9889	0.100002	0.93453	-0.2623	0.02753	none	none	none	none	none	none
ENSMUSG00000031931	Ankrd49	none	39.7231	-0.304536	NA	49.4809	0.333298	0.718934	12.7412	-0.419831	0.957669	54.9514	0.53618	0.157586	22.9822	0.681464	0.641047	0.1847	0.3721	none	none	none	none	none	none
ENSMUSG00000044864	Ankrd50	none	187.191	0.246711	0.641399	111.676	0.5043	0.18014	101.079	0.069894	0.99405	114.558	0.573719	0.0305744	42.3496	-0.791031	0.394311	0.008089	0.973	none	none	none	none	none	none
ENSMUSG00000014498	Ankrd52	none	271.131	-0.0356948	0.960347	180.389	-0.324617	0.444526	243.597	-0.0627758	0.993124	138.597	-0.32586	0.361431	59.4739	-0.336382	0.749679	-0.1261	0.2923	none	none	none	none	none	none
ENSMUSG00000033055	Ankrd54	none	28.6126	1.06357	NA	19.6204	-0.37702	0.848676	19.3873	0.372454	0.953003	46.8472	1.02743	0.00672692	7.3838	0.646185	0.830238	0.7188	6.806e-06	none	none	none	increasing	none	none
ENSMUSG00000049985	Ankrd55	none	NA	NA	NA	5.57085	1.52028	NA	72.8759	0.131311	0.982927	8.89274	-0.720077	0.489275	NA	NA	NA	-0.3039	0.4493	none	none	none	none	none	none
ENSMUSG00000040183	Ankrd6	none	79.7699	-0.222123	NA	50.5322	0.119646	0.939384	22.3599	-0.0113198	0.997323	78.3516	0.0993133	0.844527	NA	NA	NA	0.1916	0.185	none	none	none	none	none	none
ENSMUSG00000078137	Ankrd63	none	92.0886	-0.499712	NA	55.6407	-0.692407	0.285709	NA	NA	NA	16.6076	-0.626246	0.423312	NA	NA	NA	NA	NA	none	none	none	none	none	none
ENSMUSG00000037904	Ankrd9	none	42.7566	0.255095	NA	19.318	-0.441146	0.782379	25.4873	0.339858	0.956332	16.5856	0.151378	0.874734	NA	NA	NA	-0.09404	0.8423	none	none	none	none	none	none
ENSMUSG00000024219	Anks1	none	24.3047	0.229629	NA	4.13202	0.584797	NA	25.3531	0.491976	0.853199	162.214	-0.654887	0.00469749	52.3646	-0.275908	0.826897	0.4698	0.000374	none	none	none	none	none	none
ENSMUSG00000058589	Anks1b	none	2007	-0.25868	0.219663	2797.98	0.0582542	0.909308	2335.53	-0.019316	0.994132	574.828	0.158493	0.688767	78.0807	-1.73883	0.00857917	-0.4074	0.00141	none	none	none	none	decreasing+neuronal	none
ENSMUSG00000022515	Anks3	none	97.6971	0.147403	0.859784	109.169	-0.33436	0.590302	56.0404	0.076524	0.994132	85.8773	0.0655743	0.901317	27.338	-0.0626614	0.979819	-0.06774	0.6556	none	none	none	none	none	none
ENSMUSG00000066191	Anks6	none	16.5272	-0.306789	NA	10.1389	-0.540288	NA	7.52567	-0.196743	0.994132	14.3115	-0.0547553	0.966346	9.193	0.0131546	0.996326	-0.1724	0.4168	none	none	none	none	none	none
ENSMUSG00000026199	Ankzf1	none	31.2368	-0.376633	NA	29.9789	0.0796275	0.970437	15.9012	-0.197984	0.991361	13.2102	-0.771339	0.310275	11.7104	-0.0368642	0.991356	-0.05146	0.7769	none	none	none	none	none	none
ENSMUSG00000036777	Anln	none	28.7185	0.564573	NA	78.0258	0.462722	0.553101	14.9415	-0.0931775	0.994132	72.0768	0.83452	0.00593852	21.7803	0.101799	0.972524	0.2361	0.1522	none	none	none	none	none	none
ENSMUSG00000037949	Ano10	none	136.14	-0.224485	0.717414	82.0385	-0.282048	0.699994	99.4119	-0.224616	0.935569	203.784	0.295026	0.250906	76.0961	0.222246	0.832483	0.3043	0.031	none	none	none	none	none	none
ENSMUSG00000038115	Ano2	none	19.7174	0.258955	NA	13.2197	0.235777	0.941077	NA	NA	NA	6.89917	0.285627	0.843611	3.93403	-6.02202	0.0332665	0.4112	0.3284	none	none	none	none	decreasing+neuronal	none
ENSMUSG00000074968	Ano3	none	1631.21	-0.452293	0.0065493	2114.23	-0.122646	0.743815	215.688	-0.475749	0.237343	345.322	-0.864067	0.000286789	34.1621	-1.51352	0.0980238	-0.3395	0.02157	none	none	none	none	none	none
ENSMUSG00000035189	Ano4	none	113.438	0.0428189	0.966086	155.838	0.134084	0.875173	136.772	0.276334	0.815721	48.4317	0.406624	0.397053	13.0788	-2.242	0.0900106	-0.2681	0.07986	none	none	none	none	none	none
ENSMUSG00000055489	Ano5	none	9.47882	0.210486	NA	21.5975	-0.419601	0.803586	29.6694	-0.457604	0.890571	7.93701	-0.0356179	0.982327	NA	NA	NA	-0.5488	0.1721	none	none	none	none	none	none
ENSMUSG00000064210	Ano6	none	41.436	0.0221634	NA	43.8874	-0.160295	0.917849	31.5432	-0.0565515	0.994132	304.735	1.5479	7.16882e-17	155.789	0.109799	0.911078	0.6269	1.666e-09	none	none	none	increasing	none	none
ENSMUSG00000034863	Ano8	none	178.032	-0.146387	0.819542	118.983	-0.14534	0.88127	124.274	0.202986	0.932376	93.0226	0.514131	0.114149	18.9264	-1.10088	0.452718	-0.01595	0.9416	none	none	none	none	none	none
ENSMUSG00000032249	Anp32a	none	1042.34	0.0518296	0.898326	1149.98	0.111476	0.863011	814.459	-0.0478779	0.993854	659.655	0.0281092	0.937046	339.926	-0.595423	0.0992107	-0.2083	0.1441	none	none	none	none	none	none
ENSMUSG00000028333	Anp32b	none	86.5248	0.219678	NA	95.5412	-0.378169	0.553477	46.0647	-0.808921	0.283762	87.611	0.333033	0.359797	102.652	0.222422	0.818054	0.05095	0.7892	none	none	none	none	none	none
ENSMUSG00000015749	Anp32e	none	759.029	-0.198966	0.505855	734.198	0.281217	0.204122	440.104	0.0798888	0.982927	909.332	-0.0736605	0.803187	251.3	-0.213763	0.790333	0.07822	0.5747	none	none	none	none	none	none
ENSMUSG00000039062	Anpep	none	NA	NA	NA	NA	NA	NA	NA	NA	NA	5.50321	0.384078	0.808724	195.89	4.82668	2.25721e-24	0.3138	0.3839	none	none	none	none	increasing	none
ENSMUSG00000033420	Antxr1	none	19.4825	0.797068	NA	NA	NA	NA	8.08967	0.225868	0.992897	625.078	1.16614	8.35093e-09	5.59545	-0.262019	0.951513	1.367	3.842e-29	none	none	none	increasing	none	increasing
ENSMUSG00000024659	Anxa1	none	NA	NA	NA	NA	NA	NA	8.12521	0.130633	0.994132	11.5528	-0.73371	0.411904	NA	NA	NA	0.3128	0.5597	none	none	none	none	none	none
ENSMUSG00000021866	Anxa11	none	380.542	-0.140325	0.805064	558.427	0.52739	0.0304611	89.9855	0.218569	0.939405	75.6457	0.489812	0.214048	53.2323	0.291891	0.826059	-0.05582	0.7894	none	none	none	none	none	none
ENSMUSG00000032231	Anxa2	none	26.7453	0.511456	NA	5.63912	0.613119	NA	36.9682	0.438709	0.836211	180.643	2.63344	3.36952e-27	78.9684	2.89859	2.02588e-08	2.027	2.298e-30	none	none	none	increasing	increasing	increasing
ENSMUSG00000029484	Anxa3	none	15.7601	0.966801	NA	3.88759	0.41852	NA	10.5694	0.911295	0.802175	65.7523	4.41134	2.88881e-24	1323.7	0.046142	0.956602	2.078	2.133e-41	none	none	none	increasing	none	increasing
ENSMUSG00000029994	Anxa4	none	20.154	0.0260114	NA	12.0036	0.02124	NA	26.0097	0.673543	0.665047	124.87	1.86822	2.55919e-16	312.932	2.31713	1.67448e-13	1.902	8.016e-21	none	none	none	increasing	increasing	increasing
ENSMUSG00000027712	Anxa5	none	217.802	-0.0597323	0.937801	53.7361	-0.406762	0.662277	530.782	0.31157	0.4354	1728.76	0.905385	6.81017e-10	850.866	2.23223	6.89978e-18	1.722	1.023e-43	none	none	none	none	increasing	increasing
ENSMUSG00000018340	Anxa6	none	1084.53	0.155232	0.606812	1047.97	-0.0926765	0.832154	1076.48	0.19385	0.812167	545.29	-0.0434897	0.902283	253.036	0.0503493	0.956891	-0.1153	0.4515	none	none	none	none	none	none
ENSMUSG00000021814	Anxa7	none	816.982	-0.148093	0.661978	781.113	-0.244973	0.26054	319.455	0.184922	0.914752	238.13	0.231562	0.455462	164.295	0.551462	0.286062	-0.08917	0.5321	none	none	none	none	none	none
ENSMUSG00000021458	Aopep	none	79.945	0.137062	NA	56.9016	0.46807	0.51493	35.5985	0.00780989	0.997323	23.6076	0.478616	0.440756	17.8765	1.94994	0.0996821	NA	NA	none	none	none	none	none	none
ENSMUSG00000063558	Aox1	none	4.34561	0.421117	NA	NA	NA	NA	NA	NA	NA	68.668	-0.0251551	0.968482	NA	NA	NA	0.7888	1.751e-07	none	none	none	none	none	none
ENSMUSG00000038242	Aox4	none	7.82638	0.282437	NA	NA	NA	NA	NA	NA	NA	NA	NA	NA	NA	NA	NA	0.5403	0.2515	none	none	none	none	none	none
ENSMUSG00000074238	Ap1ar	none	146.407	-0.0705451	0.938305	163.267	-0.291064	0.533401	111.516	-0.120052	0.980148	80.4369	-0.00198906	0.996642	24.4752	-0.851655	0.493412	-0.326	0.001624	none	none	none	none	none	none
ENSMUSG00000009090	Ap1b1	none	1916.37	0.222044	0.293731	1637.26	-0.125236	0.68055	1178.57	0.2012	0.862867	541.054	-0.120032	0.661081	343.159	-0.454302	0.338575	0.008636	0.9662	none	none	none	none	none	none
ENSMUSG00000031731	Ap1g1	none	821.22	-0.213669	0.47703	1075.18	0.116514	0.753491	517.596	0.107719	0.957654	358.334	-0.365065	0.0841099	241.946	0.0784426	0.925634	-0.2561	0.02791	none	none	none	none	none	none
ENSMUSG00000003033	Ap1m1	none	406.561	0.0298556	0.962157	398.32	0.0628493	0.92281	175.998	0.257782	0.825377	142.234	0.238657	0.495562	74.5875	-0.359599	0.69951	-0.03481	0.8234	none	none	none	none	none	none
ENSMUSG00000003309	Ap1m2	none	NA	NA	NA	NA	NA	NA	NA	NA	NA	NA	NA	NA	NA	NA	NA	0.07084	0.9372	none	none	none	none	none	none
ENSMUSG00000004849	Ap1s1	none	1386.88	0.18563	0.483477	1271.57	0.258395	0.35335	347.615	-0.0485586	0.993823	614.965	0.362898	0.0626503	160.636	0.488293	0.373197	0.1778	0.2304	none	none	none	none	none	none
ENSMUSG00000031367	Ap1s2	none	221.955	-0.622717	0.0471863	339.45	-0.336225	0.331941	402.417	-0.17848	0.87891	158.045	-0.247887	0.44306	281.353	0.384112	0.504688	0.0187	0.9528	none	none	none	none	none	none
ENSMUSG00000054702	Ap1s3	none	9.70243	-0.0241801	NA	NA	NA	NA	NA	NA	NA	4.10264	-1.42571	0.307693	NA	NA	NA	-0.6226	0.1238	none	none	none	none	none	none
ENSMUSG00000060279	Ap2a1	none	2422.79	0.282288	0.146379	1585.1	0.174004	0.517344	1273.3	0.030245	0.994132	682.91	0.0369366	0.91814	184.404	-0.509503	0.386535	-0.01415	0.9537	none	none	none	none	none	none
ENSMUSG00000002957	Ap2a2	none	2759.37	0.221586	0.318851	3543.34	0.306663	0.054632	1462.32	0.0602514	0.98703	937.29	-0.0631029	0.83916	209.261	-0.971123	0.00927889	0.152	0.3433	none	none	none	none	none	none
ENSMUSG00000035152	Ap2b1	none	4993.59	-0.000662576	0.999806	8367.23	0.25775	0.113321	2883.09	0.190575	0.731814	1264.45	-0.0658899	0.829652	425.662	-0.191053	0.735908	-0.2416	0.1188	none	none	none	none	none	none
ENSMUSG00000022841	Ap2m1	none	186.35	-0.0624144	0.941	211.376	0.342969	0.444787	83.5566	0.301791	0.842567	66.3442	0.196435	0.675075	32.5875	-0.471343	0.713558	-0.1813	0.1866	none	none	none	none	none	none
ENSMUSG00000008036	Ap2s1	none	1787.68	-0.160476	0.509242	1885.37	0.0568555	0.905046	842.867	0.244579	0.593177	1131.98	0.313061	0.0963254	296.427	0.352241	0.489725	0.04499	0.8566	none	none	none	none	none	none
ENSMUSG00000021686	Ap3b1	none	421.764	-0.352065	0.221126	569.45	-0.0177441	0.980844	176.195	0.234569	0.865245	194.334	-0.2135	0.476763	193.993	0.183865	0.805584	-0.1432	0.335	none	none	none	none	none	none
ENSMUSG00000062444	Ap3b2	none	1521.04	-0.0219087	0.961149	1756.67	0.0333668	0.953744	564.267	0.218548	0.768394	294.734	-0.410043	0.100838	59.954	-2.7055	1.12049e-05	-0.246	0.03273	none	none	none	none	decreasing+neuronal	none
ENSMUSG00000020198	Ap3d1	none	1466.04	0.136951	0.641399	1234.59	0.0252733	0.966666	662.862	-0.00377893	0.997323	733.07	-0.113798	0.709175	322.157	-0.219394	0.710983	-0.1816	0.1466	none	none	none	none	none	none
ENSMUSG00000021824	Ap3m1	none	41.7755	-0.287848	NA	46.5803	0.0882169	0.959607	39.5712	0.24102	0.962425	63.6412	-0.0693486	0.902667	32.2673	-0.0445838	0.985327	-0.01069	0.956	none	none	none	none	none	none
ENSMUSG00000031539	Ap3m2	none	955.207	0.0221105	0.963676	947.865	-0.128365	0.773813	215.194	0.0328201	0.994132	254.013	-0.163503	0.601924	72.2084	-0.74924	0.252571	-0.2744	0.01663	none	none	none	none	none	none
ENSMUSG00000024480	Ap3s1	none	49.2238	0.317175	NA	17.2269	0.275367	0.905581	33.7674	-0.986915	0.193652	42.4853	-0.0792594	0.911081	7.28382	0.014781	0.996326	-0.1624	0.3181	none	none	none	none	none	none
ENSMUSG00000063801	Ap3s2	none	310.937	0.0878358	0.886224	332.989	-0.00749471	0.992254	284.658	0.0783369	0.987608	220.756	0.112507	0.729844	55.2181	0.251297	0.832646	-0.1532	0.1692	none	none	none	none	none	none
ENSMUSG00000032952	Ap4b1	none	13.7957	0.0461854	NA	12.2391	0.141465	0.967888	8.97318	0.0169814	0.997323	7.59178	-0.0129002	0.992506	NA	NA	NA	0.3131	0.04043	none	none	none	none	none	none
ENSMUSG00000001998	Ap4e1	none	42.0782	-0.274677	NA	59.5342	0.309925	0.730525	40.9713	-0.119982	0.991399	48.2985	0.0602015	0.923289	36.4007	0.88567	0.351435	0.04212	0.8476	none	none	none	none	none	none
ENSMUSG00000019518	Ap4m1	none	52.264	-0.0668213	NA	49.844	-0.169627	0.902987	21.8704	0.233231	0.980439	24.1705	-0.115757	0.893598	15.5074	-0.633552	0.746258	-0.08061	0.6937	none	none	none	none	none	none
ENSMUSG00000020955	Ap4s1	none	241.273	-0.00181827	0.999806	201.275	-0.0817318	0.929812	207.868	0.0080829	0.996968	239.109	-0.151418	0.624276	49.9108	-0.287871	0.815092	-0.2808	0.06253	none	none	none	none	none	none
ENSMUSG00000049562	Ap5b1	none	21.2433	0.0571107	NA	17.333	-0.00495995	0.998561	9.20059	1.32875	0.574592	5.27036	0.399826	0.798393	21.5117	0.130805	0.956602	NA	NA	none	none	none	none	none	none
ENSMUSG00000036291	Ap5m1	none	145.599	-0.367156	0.468259	193.031	0.223609	0.648096	139.296	0.167774	0.962425	96.8414	0.105441	0.831385	48.9716	0.255208	0.839085	NA	NA	none	none	none	none	none	none
ENSMUSG00000068264	Ap5s1	none	32.1699	0.104271	NA	24.3524	-0.0208182	0.992385	19.4264	0.210429	0.991361	31.7192	-0.43365	0.454422	19.5239	0.409985	0.829348	NA	NA	none	none	none	none	none	none
ENSMUSG00000039623	Ap5z1	none	45.8994	0.583781	NA	29.9397	0.0655257	0.976808	16.6859	0.332116	0.967268	20.1939	-0.0259715	0.980822	11.165	0.310587	0.911306	NA	NA	none	none	none	none	none	none
ENSMUSG00000019979	Apaf1	none	103.871	0.111727	0.90168	141.141	0.277137	0.615921	26.1554	0.429149	0.906835	51.5654	0.183007	0.752889	49.6961	1.02398	0.167803	0.4162	0.02153	none	none	none	none	none	none
ENSMUSG00000024897	Apba1	none	553.001	0.349264	0.170482	400.157	0.115289	0.830874	455.175	0.313569	0.495957	217.092	0.193845	0.504212	71.5877	-0.604483	0.419585	-0.2918	0.01737	none	none	none	none	none	none
ENSMUSG00000030519	Apba2	none	1875.9	-0.0512316	0.900583	1644.23	-0.276627	0.169846	388.246	0.008024	0.996155	458.459	-0.309434	0.257246	49.8234	-2.50053	5.32259e-05	-0.3357	0.0114	none	none	none	none	decreasing+neuronal	none
ENSMUSG00000004931	Apba3	none	30.6742	0.878959	NA	16.4375	0.392571	0.841294	12.3255	0.190645	0.994132	52.6304	0.253889	0.621073	14.0964	0.759903	0.71931	0.2293	0.3279	none	none	none	none	none	none
ENSMUSG00000037032	Apbb1	none	3257.71	0.0396927	0.911273	2216.52	-0.0225924	0.96915	870.631	0.129489	0.948922	512.554	-0.260543	0.339343	66.3783	-1.5629	0.00755918	-0.1406	0.4352	none	none	none	none	decreasing+neuronal	none
ENSMUSG00000026786	Apbb1ip	none	14.9325	0.213956	NA	10.9726	-0.194007	NA	NA	NA	NA	33.6609	1.91608	3.85601e-06	1038.01	0.405763	0.336906	1.826	6.873e-23	none	none	none	increasing	none	increasing
ENSMUSG00000029207	Apbb2	none	428.866	-0.18041	0.657813	253.727	-0.10808	0.881738	296.249	0.0541562	0.993823	112.566	-0.344969	0.297179	148.772	1.5998	5.703e-05	-0.04983	0.7512	none	none	none	none	increasing	none
ENSMUSG00000005871	Apc	none	1462.87	-0.0264646	0.954023	1324.42	0.00715776	0.991677	1071.08	-0.081564	0.977337	1396.86	-0.446258	0.00742152	306.17	-0.427213	0.36721	-0.07231	0.7544	none	none	none	none	none	none
ENSMUSG00000020135	Apc2	none	671.816	0.35158	0.235861	591.134	0.151119	0.699017	399.675	0.2714	0.732415	272.297	-0.792054	0.000173962	33.8964	-3.0129	3.47945e-05	-0.2149	0.2487	none	none	none	none	decreasing+neuronal	none
ENSMUSG00000071847	Apcdd1	none	20.3101	1.20047	NA	38.8172	-0.066438	0.972303	17.3161	-0.229838	0.98964	169.672	2.16496	5.27922e-24	NA	NA	NA	0.7992	7.513e-11	none	none	none	increasing	none	none
ENSMUSG00000032590	Apeh	none	33.0168	0.0191511	NA	54.6078	-0.120438	0.935111	72.0856	0.182793	0.973802	41.1933	-0.138159	0.842277	46.0744	0.0405963	0.984753	0.1305	0.456	none	none	none	none	none	none
ENSMUSG00000035960	Apex1	none	272.353	-0.0653634	0.922297	379.917	0.103865	0.855589	99.3598	-0.0197209	0.994877	123.167	0.030414	0.954466	74.456	0.650275	0.380378	0.01059	0.9629	none	none	none	none	none	none
ENSMUSG00000025269	Apex2	none	23.6244	0.19312	NA	20.0827	0.0837423	0.976808	10.2773	-0.579358	0.940059	15.4292	-0.824665	0.265484	16.1927	-0.139676	0.958832	-0.0765	0.8595	none	none	none	none	none	none
ENSMUSG00000015750	Aph1a	none	NA	NA	NA	NA	NA	NA	NA	NA	NA	7.92886	0.772267	0.509353	NA	NA	NA	0.3567	0.007437	none	none	none	none	none	none
ENSMUSG00000032375	Aph1b	none	58.8178	-0.506553	NA	65.3615	-0.316012	0.717455	95.5866	-0.500681	0.452774	147.475	-0.249314	0.432034	5.01577	-1.371	0.638732	-0.1602	0.3115	none	none	none	none	none	none
ENSMUSG00000053040	Aph1c	none	16.6531	0.181745	NA	22.985	-0.0720233	0.9775	20.2345	-0.385184	0.955991	39.095	-0.703743	0.0978834	9.59348	1.34533	0.515655	-0.2371	0.2764	none	none	none	none	none	none
ENSMUSG00000027193	Api5	none	429.896	-0.472702	0.0890541	559.86	0.00949312	0.991015	311.921	0.0584193	0.992723	201.741	-0.134244	0.689556	137.724	0.111031	0.910015	-0.1196	0.3676	none	none	none	none	none	none
ENSMUSG00000010911	Apip	none	64.4556	-0.345968	NA	59.986	0.112807	0.935363	100.775	-0.220787	0.929235	99.96	-0.0590112	0.901733	33.9978	-0.392567	0.773136	0.1068	0.7077	none	none	none	none	none	none
ENSMUSG00000030051	Aplf	none	41.4651	-0.340309	NA	27.7408	0.349143	0.80425	21.0156	-0.223546	0.983338	33.6614	0.0353633	0.966851	7.75113	1.39505	0.556441	-0.01384	0.9726	none	none	none	none	none	none
ENSMUSG00000037010	Apln	none	NA	NA	NA	NA	NA	NA	NA	NA	NA	214.709	-2.49684	6.19768e-37	NA	NA	NA	-1.394	5.985e-23	none	none	none	decreasing	none	decreasing
ENSMUSG00000006651	Aplp1	none	8127.84	0.0493702	0.895445	5785.82	-0.0882178	0.827037	1865.44	-0.074289	0.980439	8709.22	-0.260546	0.233716	267.944	-0.8948	0.0378945	-0.001326	0.9969	none	none	none	none	none	none
ENSMUSG00000031996	Aplp2	none	6588.51	-0.12635	0.628332	4464.76	-0.379166	0.0200218	7846.02	-0.196393	0.732746	9922.58	-0.1413	0.589329	2161.18	1.94188	1.53136e-11	-0.2157	0.1768	none	none	none	none	increasing	none
ENSMUSG00000033096	Apmap	none	437.229	0.0337348	0.955364	433.071	-0.103123	0.861572	493.976	-0.170508	0.884347	639.573	0.0428878	0.898365	139.141	0.697282	0.156079	NA	NA	none	none	none	none	none	none
ENSMUSG00000009585	Apobec3	none	5.09453	3.09715	NA	NA	NA	NA	NA	NA	NA	46.8119	0.646381	0.122693	206.397	1.33102	0.000354475	2.205	7.079e-24	none	none	none	none	increasing	increasing
ENSMUSG00000022548	Apod	none	420.468	1.47558	1.99188e-15	50.651	2.19342	4.3988e-07	277.32	1.16432	1.15656e-06	2264.37	2.92661	8.3816e-42	377.104	1.95979	1.27036e-09	2.808	2.069e-71	increasing	increasing	increasing	increasing	increasing	increasing
ENSMUSG00000002985	Apoe	none	2137.59	1.11467	3.1536e-11	321.715	0.84424	0.827702	909.282	1.09464	0.123493	159117	0.183881	0.494707	107640	3.83533	1.67397e-76	1.676	1.101e-15	increasing	none	none	none	increasing	increasing
ENSMUSG00000000049	Apoh	none	NA	NA	NA	3.37066	-0.235174	NA	NA	NA	NA	10.0657	1.50448	0.0613523	NA	NA	NA	-0.06754	NA	none	none	none	none	none	none
ENSMUSG00000056656	Apol8	none	24.4912	0.624218	NA	27.9447	-0.462944	0.705601	47.8943	0.0567874	0.994132	4.02873	0.421042	0.816194	NA	NA	NA	-0.2685	0.3645	none	none	none	none	none	none
ENSMUSG00000090698	Apold1	none	NA	NA	NA	NA	NA	NA	NA	NA	NA	NA	NA	NA	NA	NA	NA	-1.218	0.0007549	none	none	none	none	none	decreasing
ENSMUSG00000025525	Apool	none	36.9631	-0.0248431	NA	51.3975	0.031582	0.984076	64.0905	-0.00262044	0.997932	77.0783	0.147945	0.749403	40.7205	0.859474	0.345509	0.2268	0.5627	none	none	none	none	none	none
ENSMUSG00000037787	Apopt1	none	129.644	-0.235555	0.706725	102.343	0.0748739	0.946536	91.7238	0.249891	0.924628	156.973	0.381966	0.137257	32.7188	0.748545	0.533243	NA	NA	none	none	none	none	none	none
ENSMUSG00000022892	App	none	30781.1	-0.0367301	0.916147	22938.1	-0.261696	0.0603264	19550.4	-0.193831	0.710141	15785.2	0.0976909	0.782895	2782.29	-0.171175	0.751777	-0.2554	0.2246	none	none	none	none	none	none
ENSMUSG00000018481	Appbp2	none	921.268	-0.163916	0.583168	974.865	0.00954215	0.989562	986.66	-0.0186668	0.994132	761.15	-0.0998117	0.723503	199.62	-0.190818	0.791155	-0.1706	0.2873	none	none	none	none	none	none
ENSMUSG00000040760	Appl1	none	1113.35	-0.122193	0.69472	1195.78	0.182042	0.593462	682.995	0.145219	0.915168	560.822	-0.125688	0.637519	144.117	-0.119058	0.901893	-0.2479	0.02468	none	none	none	none	none	none
ENSMUSG00000020263	Appl2	none	67.8721	0.456109	NA	31.1505	-0.166526	0.927249	151.573	-0.264799	0.817022	759.145	-0.40772	0.0358463	83.2604	-0.166289	0.877651	-0.07361	0.5915	none	none	none	none	none	none
ENSMUSG00000006589	Aprt	none	132.327	0.190981	0.772749	155.855	0.752975	0.02236	57.1232	0.0783875	0.994132	115.849	0.740417	0.00600993	86.1804	1.11671	0.0410722	0.2875	0.09551	none	none	none	none	increasing	none
ENSMUSG00000028411	Aptx	none	134.417	-0.306324	0.606812	104.96	0.193152	0.802495	71.8681	-0.0494984	0.994132	106.111	-0.106956	0.800873	38.0699	0.193344	0.903743	-0.2479	0.06701	none	none	none	none	none	none
ENSMUSG00000042797	Aqp11	none	24.8014	-0.1256	NA	26.2255	-1.06137	0.140627	16.406	-0.0126036	0.997323	47.4872	-0.796954	0.0498907	NA	NA	NA	-0.5361	0.002742	none	none	none	none	none	none
ENSMUSG00000024411	Aqp4	none	80.005	1.07108	NA	24.9719	0.994157	0.39917	87.0514	1.20248	0.00022551	14918.8	0.764756	3.48009e-05	84.9227	-0.117527	0.934457	1.987	1.737e-38	none	none	increasing	none	none	increasing
ENSMUSG00000040383	Aqr	none	464.213	-0.272879	0.417163	460.547	-0.0531622	0.935363	233.35	-0.0820335	0.989253	171.371	-0.36738	0.175844	106.318	-0.319091	0.713558	-0.02394	0.9079	none	none	none	none	none	none
ENSMUSG00000046532	Ar	none	240.329	-0.0617022	0.932637	270.457	-0.146566	0.791243	71.6036	0.337758	0.826623	46.7243	-0.535823	0.233716	6.17515	-2.45238	0.245806	-0.4212	0.2418	none	none	none	none	none	none
ENSMUSG00000001127	Araf	none	665.921	0.314336	0.222751	559.514	0.138631	0.712244	616.522	0.193571	0.825377	513.748	0.22943	0.294689	70.6669	-0.0861874	0.953502	-0.1424	0.2477	none	none	none	none	none	none
ENSMUSG00000032812	Arap1	none	11.2682	1.63916	NA	4.63204	-0.855845	NA	127.262	-0.326716	0.753677	108.147	-0.272489	0.477525	182.376	0.636983	0.160214	1.153	9.517e-18	none	none	none	none	none	increasing
ENSMUSG00000037999	Arap2	none	597.45	-0.273053	0.362669	497.291	0.103939	0.855379	247.07	-0.37964	0.456096	417.658	0.0110793	0.980064	50.7269	-0.291403	0.811141	-0.02584	0.9033	none	none	none	none	none	none
ENSMUSG00000024451	Arap3	none	6.4454	-0.32222	NA	4.97867	-0.64541	NA	NA	NA	NA	NA	NA	NA	63.2546	-1.1561	0.0469029	-0.009192	0.9748	none	none	none	none	decreasing	none
ENSMUSG00000022602	Arc	none	769.233	-0.244933	0.516971	1015.21	-0.121002	0.967888	50.2468	-0.549409	0.644541	91.1598	-1.82829	3.26133e-08	23.0574	-3.3734	0.000305548	-1.207	5.063e-09	none	none	none	decreasing	decreasing+neuronal	decreasing
ENSMUSG00000032096	Arcn1	none	684.789	-0.095014	0.814103	836.889	0.0629257	0.902987	464.472	0.019096	0.994132	378.908	-0.0854025	0.79758	240.816	0.610731	0.155882	-0.03609	0.8113	none	none	none	none	none	none
ENSMUSG00000042350	Arel1	none	514.556	-0.0557527	0.915277	603.49	0.11052	0.818818	222.648	-0.0274764	0.994132	255.611	0.144409	0.612017	78.9232	-0.0925109	0.940907	NA	NA	none	none	none	none	none	none
ENSMUSG00000048076	Arf1	none	1507.67	0.13091	0.663143	1442.29	0.0671869	0.891674	561.977	0.143363	0.948863	624.553	0.348999	0.0604823	357.024	0.0672897	0.932137	-0.1505	0.3325	none	none	none	none	none	none
ENSMUSG00000062421	Arf2	none	264.143	0.22849	0.617328	284.595	-0.230282	0.55888	243.832	-0.112817	0.977729	208.657	0.400837	0.106576	121.842	0.239577	0.776772	-0.02156	0.907	none	none	none	none	none	none
ENSMUSG00000051853	Arf3	none	7752.08	-0.0528166	0.863613	11126.7	-0.0106799	0.982131	1439.18	0.0855521	0.972154	2565.62	0.17442	0.49308	528.488	0.199085	0.714556	-0.4176	0.03042	none	none	none	none	none	none
ENSMUSG00000021877	Arf4	none	810.628	-0.121414	0.752294	1256.12	0.155408	0.552715	484.725	0.0777957	0.983133	920.867	0.202938	0.359863	466.686	0.723071	0.0273618	0.07925	0.5599	none	none	none	none	none	none
ENSMUSG00000020440	Arf5	none	1214.01	0.0139271	0.980018	1389.93	-0.0609418	0.921487	480.605	0.0497595	0.992723	584.392	0.170435	0.465833	233.846	0.458265	0.360996	0.02645	0.9099	none	none	none	none	none	none
ENSMUSG00000044147	Arf6	none	261.767	0.106908	0.846277	169.311	-0.13086	0.855255	354.294	-0.224629	0.787763	300.793	-0.0772004	0.814841	310.547	-0.149776	0.829396	0.103	0.517	none	none	none	none	none	none
ENSMUSG00000027575	Arfgap1	none	694.004	0.187917	0.534596	649.756	0.234895	0.409816	192.524	0.13915	0.957669	128.095	-0.353142	0.295908	66.8482	-0.34414	0.727781	-0.01527	0.9283	none	none	none	none	none	none
ENSMUSG00000027255	Arfgap2	none	274.352	0.173569	0.722505	218.003	0.16553	0.764302	173.481	0.239192	0.862487	125.064	-0.289181	0.355021	80.5249	-0.0430643	0.979325	-0.02788	0.8615	none	none	none	none	none	none
ENSMUSG00000054277	Arfgap3	none	147.367	0.270287	0.645627	165.437	0.883132	0.000633886	89.8622	0.000343203	0.999397	57.4438	0.0374105	0.953905	55.6825	0.560989	0.539489	0.2694	0.08995	none	none	none	none	none	none
ENSMUSG00000067851	Arfgef1	none	1478.12	-0.435376	0.0100488	1619.68	-0.0250094	0.968072	1054.28	0.0983777	0.962425	521.218	-0.252364	0.261078	213.429	0.28949	0.650131	-0.2096	0.07902	none	none	none	none	none	none
ENSMUSG00000074582	Arfgef2	none	719.882	-0.0272451	0.960347	585.906	-0.0856304	0.857227	563.042	0.0599493	0.991361	363.311	-0.0301195	0.9376	158.593	0.358016	0.565585	-0.01011	0.9545	none	none	none	none	none	none
ENSMUSG00000019852	Arfgef3	none	1539.31	0.359085	0.0913125	1145.26	0.0100497	0.987647	543.245	0.216755	0.830808	289.194	-0.376655	0.18558	64.8579	-2.34474	1.76899e-05	NA	NA	none	none	none	none	decreasing+neuronal	none
ENSMUSG00000030881	Arfip2	none	568.573	0.135716	0.728302	517.794	-0.226119	0.45823	284.742	-0.0287143	0.994132	219.6	0.270589	0.35406	32.9543	0.0479367	0.984618	-0.06885	0.6048	none	none	none	none	none	none
ENSMUSG00000038671	Arfrp1	none	125.856	-0.0205914	0.985431	150.277	-0.134656	0.875807	67.5593	-0.109903	0.991361	103.726	0.0507336	0.92053	56.2077	-0.00620294	0.996326	-0.2271	0.1569	none	none	none	none	none	none
ENSMUSG00000021125	Arg2	none	18.6855	-0.115353	NA	19.0857	0.275145	0.905046	NA	NA	NA	NA	NA	NA	NA	NA	NA	-0.38	0.4975	none	none	none	none	none	none
ENSMUSG00000040459	Arglu1	none	110.537	-0.456751	0.463015	147.597	-0.171492	0.832043	129.394	-0.45678	0.387566	121.804	-0.61965	0.0232491	98.6087	-0.624785	0.320392	-0.1029	0.4693	none	none	none	none	none	none
ENSMUSG00000027247	Arhgap1	none	524.057	0.221741	0.527178	350.876	0.215843	0.579284	133.735	0.484741	0.427868	201.183	0.349016	0.146992	104.87	-0.210088	0.820704	0.03842	0.8008	none	none	none	none	none	none
ENSMUSG00000037148	Arhgap10	none	136.508	0.0603302	0.946876	40.7231	0.256904	0.839462	26.2681	0.365933	0.943961	19.0821	-0.578477	0.396552	10.8061	-1.06893	0.582784	-0.4519	0.09822	none	none	none	none	none	none
ENSMUSG00000041219	Arhgap11a	none	9.76105	0.077913	NA	4.81876	0.460926	NA	20.1192	0.410153	0.939405	8.12542	1.37932	0.139354	87.4415	-0.597478	0.357455	0.9985	0.000197	none	none	none	none	none	none
ENSMUSG00000041225	Arhgap12	none	135.089	-0.377117	0.470055	869.901	-0.416295	0.214931	268.29	-0.0517839	0.994132	261.094	-0.0422956	0.905249	138.565	-0.122126	0.903743	-0.316	0.05352	none	none	none	none	none	none
ENSMUSG00000049744	Arhgap15	none	102.141	-0.244561	0.729011	89.3363	0.0383844	0.9775	29.0706	-0.108479	0.994132	25.2342	0.0352524	0.97452	34.364	1.42344	0.0849031	-0.1078	0.6367	none	none	none	none	none	none
ENSMUSG00000030766	Arhgap17	none	26.7933	0.215874	NA	24.7626	0.43387	0.743523	18.5544	-0.274618	0.977956	51.4856	-0.128933	0.824395	266.475	0.0956022	0.90511	0.4432	0.0007772	none	none	none	none	none	none
ENSMUSG00000039031	Arhgap18	none	9.06096	0.339281	NA	NA	NA	NA	8.93972	-0.18124	0.994132	146.895	1.00274	6.52137e-06	76.8671	-0.0358126	0.984753	1.183	7.772e-13	none	none	none	increasing	none	increasing
ENSMUSG00000025154	Arhgap19	none	22.7203	-0.124142	NA	18.4729	0.450483	0.783428	8.96763	-0.0907558	0.994132	15.641	0.463336	0.554438	64.6613	1.46052	0.0245556	1.11	3.412e-08	none	none	none	none	increasing	increasing
ENSMUSG00000053199	Arhgap20	none	655.794	-0.317939	0.199147	499.539	0.121955	0.767362	498.596	-0.144178	0.939405	165.612	-0.145587	0.717815	22.8559	-1.97481	0.0332665	-0.4781	0.0005292	none	none	none	none	decreasing+neuronal	none
ENSMUSG00000036591	Arhgap21	none	334.928	-0.0219992	0.97525	509.333	0.334137	0.108795	263.34	-0.299548	0.686472	346.571	-0.25383	0.280017	56.4355	-0.808338	0.368847	-0.01468	0.9461	none	none	none	none	none	none
ENSMUSG00000063506	Arhgap22	none	NA	NA	NA	NA	NA	NA	NA	NA	NA	4.5034	2.89295	0.0420844	50.527	-0.165435	0.907029	0.7733	0.001621	none	none	none	increasing	none	none
ENSMUSG00000049807	Arhgap23	none	127.302	0.511602	0.321165	149.325	0.50341	0.172319	62.4215	0.0471982	0.994132	83.8479	0.170002	0.692185	12.9136	-1.78754	0.211408	-0.04815	0.7799	none	none	none	none	none	none
ENSMUSG00000057315	Arhgap24	none	12.3282	0.0335249	NA	7.03481	0.726622	NA	49.1576	0.17162	0.980148	48.1146	-0.212637	0.679685	66.7188	1.70349	0.00199612	0.1602	0.6241	none	none	none	none	increasing	none
ENSMUSG00000030047	Arhgap25	none	98.5521	0.676777	0.170834	8.05877	0.119926	NA	NA	NA	NA	8.54445	0.150625	0.915611	239.346	0.907364	0.0365579	1.385	8.169e-07	none	none	none	none	none	increasing
ENSMUSG00000036452	Arhgap26	none	1169.89	0.0924775	0.788037	816.528	-0.253331	0.490897	1245.56	-0.170528	0.862779	235.794	-0.501326	0.0154349	60.6037	-1.45437	0.0202703	-0.3667	0.02857	none	none	none	none	decreasing+neuronal	none
ENSMUSG00000034255	Arhgap27	none	23.6348	0.58917	NA	19.3362	-0.411267	0.806321	33.2763	0.153724	0.991361	7.1897	0.0390364	0.981641	95.0967	-0.851775	0.103082	0.4697	0.001491	none	none	none	none	none	none
ENSMUSG00000085360	Arhgap27os2	none	NA	NA	NA	4.86533	0.18881	NA	NA	NA	NA	NA	NA	NA	NA	NA	NA	NA	NA	none	none	none	none	none	none
ENSMUSG00000039831	Arhgap29	none	51.4886	0.167342	NA	38.2352	0.340205	0.775472	9.47215	0.562727	0.950864	45.6041	1.07183	0.00471659	27.7739	-0.548935	0.689208	-0.3889	0.01789	none	none	none	increasing	none	none
ENSMUSG00000022799	Arhgap31	none	90.9699	-0.408783	NA	30.2861	0.142565	0.942708	450.189	-0.174099	0.887528	358.859	0.699583	0.00308158	157.133	0.072907	0.942389	0.6817	5.692e-12	none	none	none	none	none	none
ENSMUSG00000041444	Arhgap32	none	3999.94	-0.0551961	0.860345	1133.5	-0.0503354	0.941077	729.653	-0.155523	0.890745	1310.64	-0.309123	0.111834	116.223	-1.54986	0.000362122	-0.3348	0.1297	none	none	none	none	decreasing+neuronal	none
ENSMUSG00000036882	Arhgap33	none	316.585	0.319377	0.397222	163.032	0.0545714	0.963389	9.84149	0.523082	0.956332	83.0944	-0.64362	0.0500707	8.53083	-4.65168	0.0122543	-0.5285	0.007623	none	none	none	none	decreasing+neuronal	none
ENSMUSG00000058230	Arhgap35	none	838.095	0.311681	0.207991	736.742	0.231264	0.412051	421.036	0.155647	0.916617	412.062	0.0920166	0.760489	53.3687	-1.54436	0.0192737	NA	NA	none	none	none	none	decreasing+neuronal	none
ENSMUSG00000036198	Arhgap36	none	22.546	-0.0940971	NA	NA	NA	NA	9.33047	1.55887	0.373305	61.5471	0.631363	0.213956	3.75594	-1.8912	0.545627	-0.2558	0.7604	none	none	none	none	none	none
ENSMUSG00000033697	Arhgap39	none	218.451	0.383443	0.380559	449.965	0.442525	0.0787906	41.7847	0.200057	0.974617	46.9814	-0.272541	0.592816	65.3435	-0.491268	0.569082	0.08537	0.6209	none	none	none	none	none	none
ENSMUSG00000050730	Arhgap42	none	89.8118	0.353865	NA	32.511	0.331062	0.795525	33.6435	0.391761	0.892104	121.884	0.159643	0.688576	NA	NA	NA	0.1617	0.458	none	none	none	none	none	none
ENSMUSG00000033389	Arhgap44	none	607.42	0.319043	0.27163	493.358	0.206198	0.521258	342.989	0.0430105	0.994132	155.566	0.144861	0.714468	22.1247	-2.18064	0.0324147	-0.2877	0.009018	none	none	none	none	decreasing+neuronal	none
ENSMUSG00000035697	Arhgap45	none	7.17505	0.869171	NA	NA	NA	NA	NA	NA	NA	NA	NA	NA	299.482	-0.514643	0.281404	NA	NA	none	none	none	none	none	none
ENSMUSG00000035133	Arhgap5	none	843.786	-0.47419	0.0266142	946.818	0.169362	0.609054	2221.65	-0.190033	0.882391	2797.47	-0.523646	0.00882308	1139.16	-0.250282	0.618057	-0.05608	0.6891	none	none	none	none	none	none
ENSMUSG00000031355	Arhgap6	none	44.5274	-0.383654	NA	10.7256	-0.263294	NA	12.4419	0.316784	0.979024	34.2727	-0.234573	0.723354	NA	NA	NA	0.04157	0.9475	none	none	none	none	none	none
ENSMUSG00000025132	Arhgdia	none	1416.98	-0.025555	0.957637	1473.6	0.0104557	0.988451	455.063	-0.121689	0.957654	1484.22	0.385167	0.02637	1775.67	0.569378	0.111763	0.04008	0.8417	none	none	none	none	none	none
ENSMUSG00000030220	Arhgdib	none	31.111	-0.393856	NA	31.9507	0.74901	0.422824	9.36661	0.48274	0.970586	17.5426	0.126459	0.89655	1373.13	0.0953516	0.879638	1.398	2.312e-16	none	none	none	none	none	increasing
ENSMUSG00000073433	Arhgdig	none	231.864	0.302266	0.494568	135.974	-0.0820578	0.935363	50.717	0.0474234	0.994132	75.6597	0.12152	0.814088	NA	NA	NA	-0.1686	0.4178	none	none	none	none	none	none
ENSMUSG00000040940	Arhgef1	none	66.9758	-0.24528	NA	51.0023	-0.236875	0.840693	22.7606	-0.293792	0.966257	32.6254	-0.307883	0.597769	103.106	-0.505367	0.453719	0.3414	0.009208	none	none	none	none	none	none
ENSMUSG00000071176	Arhgef10	none	32.3451	0.765448	NA	18.6604	0.251662	0.907404	19.1727	-0.209967	0.989253	263.339	0.273179	0.351919	16.1478	-1.1746	0.421279	0.4225	0.0001909	none	none	none	none	none	none
ENSMUSG00000040964	Arhgef10l	none	84.8362	0.371191	NA	39.9999	0.0170136	0.992068	59.4463	0.199643	0.962425	162.847	0.282601	0.328299	41.0306	-1.26021	0.0828853	0.3463	0.02454	none	none	none	none	none	none
ENSMUSG00000041977	Arhgef11	none	392.747	-0.140621	0.741176	427.664	-0.0420428	0.953535	332.588	0.18141	0.914752	148.444	-0.313298	0.266656	62.5335	-0.094385	0.951771	-0.07405	0.5946	none	none	none	none	none	none
ENSMUSG00000059495	Arhgef12	none	690.963	0.258726	0.348178	725.519	0.252991	0.36947	473.734	0.110327	0.957654	1714.65	0.359197	0.109647	129.493	-0.43365	0.503731	0.05545	0.7781	none	none	none	none	none	none
ENSMUSG00000052921	Arhgef15	none	34.4952	-0.203445	NA	9.54131	-0.528765	NA	20.4692	0.331802	0.958839	6.23775	0.032273	0.985756	NA	NA	NA	-0.1525	0.5565	none	none	none	none	none	none
ENSMUSG00000032875	Arhgef17	none	917.866	0.158392	0.638683	676.724	0.0892065	0.871423	361.48	0.176366	0.913421	245.134	0.125667	0.718266	40.5129	-1.64627	0.0200395	-0.1446	0.4221	none	none	none	none	decreasing+neuronal	none
ENSMUSG00000004568	Arhgef18	none	290.595	0.147917	0.759465	306.789	-0.131342	0.791971	160.038	0.209956	0.932928	148.516	-0.575625	0.015336	51.6149	-0.572968	0.540177	-0.08796	0.5258	none	none	none	none	none	none
ENSMUSG00000028919	Arhgef19	none	6.83501	-0.102864	NA	NA	NA	NA	7.12501	0.456342	0.977337	182.336	0.0871147	0.844502	NA	NA	NA	0.9764	1.71e-06	none	none	none	none	none	none
ENSMUSG00000028059	Arhgef2	none	1031.31	-0.0335585	0.946876	992.504	0.0735743	0.876663	169.917	0.122184	0.977337	118.675	-0.270274	0.523093	226.493	0.162841	0.830093	-0.2223	0.08178	none	none	none	none	none	none
ENSMUSG00000019467	Arhgef25	none	158.567	0.282347	0.598211	273.389	0.13207	0.856321	33.6618	0.403326	0.908037	63.7396	0.781989	0.0313426	13.0304	-3.06977	0.0149112	-0.3325	0.02094	none	none	none	none	decreasing+neuronal	none
ENSMUSG00000036885	Arhgef26	none	32.5213	0.655551	NA	207.297	0.0268969	0.978534	58.8899	0.116171	0.991361	583.52	-0.276287	0.232606	7.57316	-1.15779	0.638715	0.7158	3.645e-11	none	none	none	none	none	none
ENSMUSG00000021662	Arhgef28	none	226.749	0.192548	0.698422	570.531	0.121043	0.749053	9.07654	-0.488556	0.968979	105.449	-0.0120372	0.982944	15.2412	-1.81705	0.147809	NA	NA	none	none	none	none	none	none
ENSMUSG00000021895	Arhgef3	none	402.747	0.0979697	0.838305	523.531	0.0420643	0.953483	189.6	0.00258427	0.997356	53.7612	-0.16312	0.767672	51.188	-0.870921	0.236402	-0.2717	0.03053	none	none	none	none	none	none
ENSMUSG00000054901	Arhgef33	none	4.13152	0.780606	NA	NA	NA	NA	943.201	-0.302222	0.433297	19.3526	0.574312	0.390326	11.0528	-2.0615	0.187286	1.35	0.0001752	none	none	none	none	none	increasing
ENSMUSG00000045094	Arhgef37	none	NA	NA	NA	NA	NA	NA	21.858	-0.035302	0.994877	37.4313	1.51334	7.72215e-05	NA	NA	NA	1.045	0.0005682	none	none	none	increasing	none	increasing
ENSMUSG00000037509	Arhgef4	none	280.628	0.0945386	0.870455	251.88	0.247166	0.567209	142.185	0.114558	0.980148	430.402	0.832995	2.97186e-07	22.556	-1.88305	0.049859	-0.1118	0.4795	none	none	none	none	decreasing+neuronal	none
ENSMUSG00000004562	Arhgef40	none	22.1474	0.233458	NA	5.28435	0.307605	NA	38.2864	0.379422	0.908037	94.8883	-0.194352	0.670396	82.8282	-1.58194	0.00350102	0.5927	8.761e-06	none	none	none	none	decreasing	none
ENSMUSG00000031133	Arhgef6	none	17.5007	0.171904	NA	96.3469	0.232689	0.759062	137.698	0.186315	0.939405	38.4249	0.420448	0.386347	248.284	-0.516169	0.264248	0.07648	0.6607	none	none	none	none	none	none
ENSMUSG00000031511	Arhgef7	none	665.279	0.00339099	0.99665	650.381	0.183826	0.565465	346.806	-0.139494	0.948922	225.994	0.105433	0.750976	128.724	1.11634	0.0125115	-0.03771	0.8154	none	none	none	none	increasing	none
ENSMUSG00000025656	Arhgef9	none	1457.14	-0.0102396	0.98367	1432.54	-0.0623713	0.893429	506.823	0.0828721	0.977729	490.31	-0.224639	0.315481	63.5054	-1.39953	0.0259631	-0.3306	0.02369	none	none	none	none	decreasing+neuronal	none
ENSMUSG00000007880	Arid1a	none	915.799	-0.129127	0.688113	877.253	0.13891	0.748442	390.461	0.0831429	0.988775	353.908	-0.633626	0.00199018	257.917	-0.333534	0.534575	-0.1754	0.1547	none	none	none	none	none	none
ENSMUSG00000069729	Arid1b	none	638.787	0.0779468	0.859251	757.541	0.0295831	0.963002	333.785	-0.194935	0.897464	183.148	-0.417992	0.0898366	117.349	0.21265	0.819379	-0.148	0.2608	none	none	none	none	none	none
ENSMUSG00000033237	Arid2	none	235.763	0.0456615	0.951136	242.645	0.29414	0.413027	271.073	-0.299682	0.717886	261.691	-0.613711	0.00751802	132.468	0.0864648	0.931166	-0.03446	0.8587	none	none	none	none	none	none
ENSMUSG00000019564	Arid3a	none	7.41831	1.52579	NA	5.46603	0.142671	NA	5.82704	0.475265	0.977956	NA	NA	NA	29.6943	0.0134803	0.993629	0.1732	0.5209	none	none	none	none	none	none
ENSMUSG00000004661	Arid3b	none	8.17608	-0.40132	NA	NA	NA	NA	NA	NA	NA	4.75378	0.319919	0.851037	18.4606	-1.36012	0.267953	-0.1655	0.5752	none	none	none	none	none	none
ENSMUSG00000048118	Arid4a	none	233.704	-0.0696124	0.920823	322.343	0.0893181	0.899293	137.026	-0.452806	0.390277	118.671	-0.779006	0.00348501	125.142	-0.109598	0.913908	-0.06092	0.7614	none	none	none	none	none	none
ENSMUSG00000039219	Arid4b	none	333.421	-0.314137	0.35854	503.307	-8.29796e-05	0.999853	359.274	-0.375409	0.398767	152.785	-0.529011	0.0655825	121.811	0.552235	0.353937	0.1458	0.2656	none	none	none	none	none	none
ENSMUSG00000037447	Arid5a	none	19.9491	0.392608	NA	8.98763	1.18198	NA	19.8321	1.54379	0.0749048	65.8123	0.215746	0.632959	20.718	-0.38725	0.830525	1.03	1.405e-13	none	none	none	none	none	increasing
ENSMUSG00000019947	Arid5b	none	292.659	0.296856	0.45021	250.956	-0.154256	0.759835	133.474	0.0257312	0.994132	97.9687	0.249503	0.501455	75.6433	0.0628871	0.967393	0.05244	0.8381	none	none	none	none	none	none
ENSMUSG00000025234	Arih1	none	488.078	-0.330939	0.259241	465.177	-0.044017	0.948749	255.792	0.051399	0.994132	214.175	-0.0939921	0.775456	129.477	0.29772	0.713222	-0.1535	0.216	none	none	none	none	none	none
ENSMUSG00000064145	Arih2	none	67.7256	-0.00710654	NA	72.5154	0.0189055	0.990088	27.8921	0.377565	0.94749	40.1621	0.0790608	0.905479	20.2873	0.701905	0.655819	-0.02368	0.8943	none	none	none	none	none	none
ENSMUSG00000060904	Arl1	none	609.832	-0.118753	0.759427	790.562	-0.00536932	0.994613	374.207	-0.0222962	0.994132	367.992	0.153188	0.572446	132.682	0.340631	0.639324	-0.02895	0.8721	none	none	none	none	none	none
ENSMUSG00000025870	Arl10	none	29.1265	0.238128	NA	33.094	-0.34667	0.788037	18.0557	0.404237	0.950864	51.2677	-0.110105	0.856143	25.8546	0.410249	0.799172	-0.04379	0.8839	none	none	none	none	none	none
ENSMUSG00000022911	Arl13b	none	24.8602	-0.105382	NA	25.4455	-0.292508	0.869218	10.584	-0.273217	0.991361	39.936	0.333068	0.530239	23.5039	0.414516	0.816473	0.21	0.3425	none	none	none	none	none	none
ENSMUSG00000027122	Arl14ep	none	288.737	-0.262931	0.502629	501.76	-0.0337595	0.960515	266.714	-0.085581	0.983338	278.83	-0.00104533	0.997496	101.725	0.310264	0.71896	NA	NA	none	none	none	none	none	none
ENSMUSG00000042348	Arl15	none	212.815	0.303094	0.508146	404.026	0.094097	0.879949	56.1683	-0.0545787	0.994132	91.4752	0.352638	0.332024	29.0747	0.180602	0.921222	-0.1782	0.2234	none	none	none	none	none	none
ENSMUSG00000057594	Arl16	none	52.431	-0.264926	NA	55.1249	0.0917414	0.953535	42.7036	-0.309775	0.940059	48.2049	0.463864	0.285366	13.5139	-0.223769	0.939203	-0.0341	0.882	none	none	none	none	none	none
ENSMUSG00000024944	Arl2	none	393.777	0.285367	0.38734	285.072	-0.06542	0.931254	350.943	0.280372	0.699256	408.64	0.75484	2.0189e-05	78.5528	0.218452	0.844253	0.2243	0.2621	none	none	none	none	none	none
ENSMUSG00000031776	Arl2bp	none	189.269	0.0824289	0.90829	181.942	-0.411789	0.18014	154.676	-0.109517	0.980148	582.146	0.136008	0.647822	34.6864	0.577092	0.626022	-0.04558	0.7547	none	none	none	none	none	none
ENSMUSG00000025035	Arl3	none	915.054	-0.0861009	0.82	826.77	-0.26986	0.233416	900.216	-0.0974306	0.9661	1053.49	0.0396321	0.900273	111.666	0.0256793	0.986338	-0.2079	0.1059	none	none	none	none	none	none
ENSMUSG00000047446	Arl4a	none	125.463	-0.38894	0.479006	99.6779	-0.20738	0.796023	181.996	-0.731265	0.142978	105.748	0.190811	0.640646	19.4796	-0.519887	0.763666	-0.07971	0.6899	none	none	none	none	none	none
ENSMUSG00000049866	Arl4c	none	65.6922	-0.0315518	NA	21.4102	-0.673712	0.597468	327.991	0.111814	0.970586	75.9345	0.382968	0.295641	189.762	1.30958	0.000437163	0.2349	0.09357	none	none	none	none	increasing	none
ENSMUSG00000034936	Arl4d	none	39.6955	-0.483376	NA	24.5125	0.946972	0.233416	22.5623	0.1908	0.991361	12.2829	0.696383	0.439235	NA	NA	NA	-0.5179	0.02161	none	none	none	none	none	none
ENSMUSG00000036093	Arl5a	none	112.184	-0.119756	0.892297	110.618	-0.00577231	0.994613	149.082	-0.153794	0.958839	222.661	0.0957922	0.785943	80.5126	0.728984	0.266212	-0.07377	0.5986	none	none	none	none	none	none
ENSMUSG00000017418	Arl5b	none	73.8375	-0.377523	NA	116.158	0.0498501	0.968549	63.3645	-0.45552	0.702568	58.0324	-0.177556	0.725563	21.5257	0.558683	0.738719	-0.241	0.2664	none	none	none	none	none	none
ENSMUSG00000022722	Arl6	none	215.294	-0.156346	0.78562	187.536	-0.295456	0.461294	112.298	-0.36328	0.71557	135.929	-0.270997	0.390511	18.3724	0.239293	0.917899	-0.1098	0.5889	none	none	none	none	none	none
ENSMUSG00000030654	Arl6ip1	none	1995.56	0.0602326	0.858564	2227.44	-0.01804	0.982009	1432.19	-0.0154175	0.994132	3820.57	0.119716	0.659643	705.39	0.308798	0.522568	-0.06985	0.6846	none	none	none	none	none	none
ENSMUSG00000029404	Arl6ip4	none	60.2569	0.131257	NA	31.9106	-0.258665	0.867468	33.7686	-0.353858	0.939405	28.6265	-0.14746	0.840007	22.9704	-0.0544328	0.984753	-0.003863	0.9884	none	none	none	none	none	none
ENSMUSG00000035199	Arl6ip5	none	1106.85	-0.164552	0.593483	981.442	-0.128996	0.700593	909.269	-0.236058	0.646907	1060.22	-0.0559646	0.831598	344.248	0.632476	0.0767329	-0.1649	0.1821	none	none	none	none	none	none
ENSMUSG00000026960	Arl6ip6	none	21.7769	0.230027	NA	18.1297	0.50533	0.751809	25.6057	0.0496136	0.994132	47.5913	-0.289111	0.559684	22.6126	0.268644	0.89004	0.4293	0.08204	none	none	none	none	none	none
ENSMUSG00000026426	Arl8a	none	1200.35	0.0917031	0.782916	1289.32	-0.0416177	0.953744	658.532	0.00645512	0.996155	1310.31	0.454091	0.00601477	379.64	0.66297	0.0566367	0.04428	0.7896	none	none	none	none	none	none
ENSMUSG00000030105	Arl8b	none	1477.02	-0.174977	0.504171	2391.76	0.0950742	0.858103	938.633	0.205554	0.755029	1068.26	0.364277	0.0259425	450.372	0.851448	0.00867711	-0.2002	0.1018	none	none	none	none	none	none
ENSMUSG00000027599	Armc1	none	589.469	-0.148162	0.685083	618.595	0.0804162	0.880376	374.587	0.0776359	0.988481	366.548	-0.20976	0.393109	74.0949	0.081458	0.952442	-0.2541	0.03395	none	none	none	none	none	none
ENSMUSG00000038525	Armc10	none	65.4402	0.156093	NA	63.1258	0.0258362	0.984722	16.3165	0.386549	0.957654	30.7359	0.528354	0.305182	24.6465	0.100829	0.966185	0.06225	0.7511	none	none	none	none	none	none
ENSMUSG00000071324	Armc2	none	54.171	0.0568541	NA	40.1096	-0.315103	0.796084	12.2823	0.564018	0.924628	25.4113	-0.27157	0.711301	6.73566	2.88176	0.222275	-0.1851	0.4602	none	none	none	none	none	none
ENSMUSG00000061802	Armc4	none	NA	NA	NA	NA	NA	NA	8.0887	0.850403	0.885856	14.4577	-0.647028	0.444638	NA	NA	NA	0.8197	0.09263	none	none	none	none	none	none
ENSMUSG00000042178	Armc5	none	31.9481	0.2105	NA	18.3608	0.149966	0.958821	20.2577	0.424492	0.939109	22.6391	-0.0257034	0.980019	27.6581	0.416282	0.799173	0.6971	0.000397	none	none	none	none	none	none
ENSMUSG00000002343	Armc6	none	190.326	0.0640208	0.938057	174.181	-0.192047	0.749053	68.5498	0.404931	0.777081	48.3319	-0.791357	0.0421063	13.414	-0.915718	0.603282	-0.164	0.515	none	none	none	none	none	none
ENSMUSG00000057219	Armc7	none	39.1689	-0.409609	NA	23.0516	-0.055649	0.982009	13.6831	0.537679	0.924628	15.1772	0.0715555	0.949138	21.2875	-0.0520384	0.986842	0.1198	0.7018	none	none	none	none	none	none
ENSMUSG00000032468	Armc8	none	747.699	-0.0283506	0.954345	800.619	0.078071	0.874378	363.574	0.121469	0.957654	263.334	-0.285635	0.26642	92.8916	0.18122	0.858702	-0.1923	0.1584	none	none	none	none	none	none
ENSMUSG00000062590	Armc9	none	238.576	0.0767807	0.915277	205.937	0.242919	0.566898	86.9018	0.390833	0.712637	66.0953	0.28513	0.484328	14.3829	-0.757861	0.684551	-0.009798	0.9646	none	none	none	none	none	none
ENSMUSG00000033460	Armcx1	none	562.006	-0.26884	0.350594	572.516	-0.190886	0.573276	471.236	0.0906316	0.976814	184.556	-0.211188	0.505233	25.3829	-1.92356	0.0270507	-0.421	0.0003866	none	none	none	none	decreasing+neuronal	none
ENSMUSG00000033436	Armcx2	none	585.958	-0.312544	0.250963	623.515	-0.0707535	0.902987	549.309	-0.137944	0.939405	311.37	-0.267484	0.310659	61.0966	-0.840072	0.211795	-0.3693	0.0001588	none	none	none	none	none	none
ENSMUSG00000049047	Armcx3	none	22.5158	0.273764	NA	22.7494	0.0477242	0.984076	19.1415	0.632131	0.813487	13.8771	-0.336328	0.7293	NA	NA	NA	-0.1211	0.4088	none	none	none	none	none	none
ENSMUSG00000049804	Armcx4	none	201.412	0.108604	0.859784	343.759	0.0880333	0.880606	126.683	-0.00641808	0.997323	207.089	-0.230854	0.40379	14.8845	-1.7344	0.163913	-0.2134	0.104	none	none	none	none	none	none
ENSMUSG00000072969	Armcx5	none	130.326	-0.247228	0.691431	136.455	0.191331	0.783428	64.1831	0.0656767	0.994132	41.4511	0.0818905	0.920641	11.4718	0.505207	0.838655	0.1298	0.4259	none	none	none	none	none	none
ENSMUSG00000050394	Armcx6	none	16.9555	-1.0368	NA	20.9773	-0.418501	0.784921	32.1543	0.607075	0.665047	44.2299	0.39293	0.393109	7.6641	0.606949	0.836851	-0.0324	0.9377	none	none	none	none	none	none
ENSMUSG00000039901	Armh3	none	216.3	0.0296213	0.971074	259.232	0.0419302	0.961349	118.116	0.277005	0.839824	85.7033	-0.00603176	0.990483	45.2877	-0.390492	0.742807	NA	NA	none	none	none	none	none	none
ENSMUSG00000036242	Armh4	none	442.375	-0.303144	0.426222	371.672	-0.680017	3.10613e-05	3827.03	-0.723359	0.523358	383.157	-0.16477	0.713849	49.7598	-0.774047	0.388105	NA	NA	none	none	none	none	none	none
ENSMUSG00000061759	Armt1	none	239.462	-0.185967	0.71501	312.415	-0.311532	0.26624	127.433	-0.000969619	0.998298	91.9942	-0.00763634	0.989172	25.4968	0.872812	0.482956	NA	NA	none	none	none	none	none	none
ENSMUSG00000015522	Arnt	none	117.813	-0.170274	0.812447	111.369	-0.0721295	0.948749	53.8907	0.0992208	0.992723	65.1382	-0.628714	0.0614864	124.959	-0.00721573	0.994222	-0.04489	0.7863	none	none	none	none	none	none
ENSMUSG00000015709	Arnt2	none	1596.83	0.271357	0.177249	1034.75	0.185119	0.518109	346.617	0.059922	0.992723	839.144	0.16736	0.498636	51.6168	-1.07595	0.133223	-0.007016	0.978	none	none	none	none	none	none
ENSMUSG00000055116	Arntl	none	461.116	-0.181222	0.636435	429.754	0.257693	0.446952	194.071	-0.258165	0.815721	145.276	-0.450446	0.164049	36.8883	-0.934628	0.29468	-0.8282	2.412e-08	none	none	none	none	none	none
ENSMUSG00000040187	Arntl2	none	19.7167	-1.03348	NA	14.7632	-0.394325	0.858949	NA	NA	NA	3.96751	-0.382507	0.836947	NA	NA	NA	-0.03061	0.9304	none	none	none	none	none	none
ENSMUSG00000029621	Arpc1a	none	1325.57	0.00732174	0.990721	2007.59	0.0363835	0.950264	473.013	0.0399631	0.994132	395.979	0.260464	0.270916	81.6446	-0.828741	0.174832	-0.08826	0.5341	none	none	none	none	none	none
ENSMUSG00000029622	Arpc1b	none	8.4775	0.637925	NA	NA	NA	NA	NA	NA	NA	57.1839	2.85388	1.85098e-16	300.8	0.102986	0.900453	2.456	5.279e-55	none	none	none	increasing	none	increasing
ENSMUSG00000006304	Arpc2	none	1571.46	0.0103102	0.9845	3635.05	0.304187	0.0961961	528.274	0.0447763	0.993949	779.914	0.310447	0.14352	1285.72	0.326017	0.490662	-0.1422	0.3804	none	none	none	none	none	none
ENSMUSG00000029465	Arpc3	none	1459.74	0.13396	0.641392	2269.21	0.209837	0.329849	487.356	0.0992756	0.967703	508.459	0.312859	0.146992	621.187	0.453135	0.220569	-0.08829	0.5177	none	none	none	none	none	none
ENSMUSG00000079426	Arpc4	none	1407.03	-0.0370175	0.939291	2329.77	0.122822	0.696709	805.047	0.15287	0.898818	1438.28	0.363432	0.0411638	1272.12	0.580625	0.0857298	0.1213	0.3425	none	none	none	none	none	none
ENSMUSG00000008475	Arpc5	none	297.228	0.134646	0.799952	807.389	0.168407	0.612951	81.2197	0.258555	0.908037	321.305	0.941	9.11057e-07	512.259	0.933659	0.00184227	-0.0341	0.8424	none	none	none	none	none	none
ENSMUSG00000026755	Arpc5l	none	476.586	-0.156099	0.69899	506.295	-0.0918242	0.881466	434.295	-0.184564	0.878819	394.493	-0.105565	0.707104	137.129	0.239573	0.760816	-0.1574	0.2698	none	none	none	none	none	none
ENSMUSG00000039043	Arpin	none	84.6021	0.110194	NA	73.3539	-0.0163197	0.990412	85.2302	0.0755237	0.994132	151.423	0.482506	0.0624796	6.09704	-0.418138	0.909126	NA	NA	none	none	none	none	none	none
ENSMUSG00000007656	Arpp19	none	1873.18	-0.210971	0.481366	443.902	0.0363702	0.966096	251.336	-0.356246	0.452774	717.675	-0.0442779	0.910294	232.81	0.446821	0.380647	-0.456	0.003859	none	none	none	none	none	none
ENSMUSG00000032503	Arpp21	none	1865.25	-0.246745	0.352816	639.927	-0.186011	0.692762	162.069	0.0500941	0.994132	544.4	-0.197408	0.460284	53.9748	-1.43139	0.03319	-0.3077	0.1135	none	none	none	none	decreasing+neuronal	none
ENSMUSG00000060890	Arr3	none	5.16245	0.0503031	NA	3.46591	1.38943	NA	NA	NA	NA	NA	NA	NA	NA	NA	NA	0.2447	0.6357	none	none	none	none	none	none
ENSMUSG00000018909	Arrb1	none	611.517	0.15347	0.688113	329.614	-0.134907	0.795525	335.456	0.196634	0.890745	730.953	-0.305211	0.196337	166.961	-1.17536	0.00156204	-0.1357	0.4368	none	none	none	none	decreasing	none
ENSMUSG00000060216	Arrb2	none	127.942	-0.0612384	0.948615	170.773	0.326403	0.457711	57.1105	-0.201985	0.960092	53.1891	0.170779	0.741119	296.342	-0.291726	0.620271	0.1304	0.3788	none	none	none	none	none	none
ENSMUSG00000026972	Arrdc1	none	16.0798	0.67447	NA	6.40628	0.479213	NA	5.95958	-0.0211562	0.997323	6.9913	0.555951	0.661166	28.5983	-0.0416328	0.987119	0.733	9.26e-05	none	none	none	none	none	none
ENSMUSG00000002910	Arrdc2	none	12.3952	0.574195	NA	9.60576	0.626635	NA	NA	NA	NA	10.4357	0.934986	0.289765	5.5056	-0.0512223	0.991725	0.6791	0.001534	none	none	none	none	none	none
ENSMUSG00000074794	Arrdc3	none	109.977	-0.547504	0.272711	121.317	-0.370291	0.476179	67.7556	-0.322999	0.862487	124.497	-0.344296	0.276068	46.0616	-1.20734	0.0830502	-0.1306	0.5129	none	none	none	none	none	none
ENSMUSG00000042659	Arrdc4	none	15.9347	0.0943785	NA	32.3528	0.195553	0.909682	13.7146	0.239424	0.991361	14.2632	1.00647	0.155567	41.5849	1.30371	0.103082	0.4122	0.03092	none	none	none	none	none	none
ENSMUSG00000022620	Arsa	none	137.15	0.203826	0.755527	84.3464	0.0386859	0.978025	92.5783	-0.400509	0.685621	284.855	0.230113	0.461684	115.376	0.377474	0.601115	0.4619	0.0003977	none	none	none	none	none	none
ENSMUSG00000042082	Arsb	none	935.093	0.0403667	0.928263	1051.69	-0.128367	0.713126	381.708	-0.165433	0.948863	2047.73	0.240383	0.298594	959.946	-0.37589	0.289064	0.2257	0.04941	none	none	none	none	none	none
ENSMUSG00000020604	Arsg	none	31.6366	0.383654	NA	15.0779	0.377175	0.858949	35.7821	0.0255809	0.995591	83.4337	1.08187	5.63681e-05	98.1988	0.222017	0.814233	0.1441	0.3972	none	none	none	increasing	none	none
ENSMUSG00000036412	Arsi	none	NA	NA	NA	6.18602	1.38523	NA	NA	NA	NA	NA	NA	NA	NA	NA	NA	-0.4194	0.3918	none	none	none	none	none	none
ENSMUSG00000046561	Arsj	none	16.6925	0.784082	NA	18.4991	1.07402	0.271794	NA	NA	NA	11.6541	0.10758	0.928288	NA	NA	NA	0.7902	0.004339	none	none	none	none	none	none
ENSMUSG00000021592	Arsk	none	17.1593	0.24731	NA	19.8682	0.00582593	0.997825	17.8497	-0.419618	0.948922	527.105	-0.486922	0.0254704	224.274	-0.0695068	0.936435	0.4662	0.01567	none	none	none	none	none	none
ENSMUSG00000031982	Arv1	none	23.7809	-0.121168	NA	17.913	-0.0810436	0.977123	12.9665	-0.0226009	0.997183	17.5372	0.433501	0.580998	8.65544	0.1925	0.958818	-0.07744	0.8018	none	none	none	none	none	none
ENSMUSG00000000325	Arvcf	none	101.17	0.608864	0.262318	53.6418	0.0282701	0.984722	28.7035	0.233948	0.979472	69.1784	0.743669	0.0158198	47.01	-0.85468	0.354429	0.4977	0.0003147	none	none	none	none	none	none
ENSMUSG00000035277	Arx	none	22.2257	-0.357263	NA	NA	NA	NA	76.138	0.310786	0.894572	23.5557	-0.335224	0.615666	NA	NA	NA	0.0798	0.8049	none	none	none	none	none	none
ENSMUSG00000003559	As3mt	none	13.6887	1.12606	NA	12.4963	0.874937	0.578446	14.2682	1.21116	0.381856	171.665	0.255639	0.373423	111.685	-0.022872	0.987552	0.6718	0.0004313	none	none	none	none	none	none
ENSMUSG00000031591	Asah1	none	562.388	-0.0813524	0.859784	461.142	0.0826569	0.884031	665.221	-0.065372	0.991361	2688.25	-0.0660793	0.831256	3568.35	0.91762	7.9617e-05	0.5822	2.196e-07	none	none	none	none	none	none
ENSMUSG00000024887	Asah2	none	121.174	0.0576543	0.953827	60.9594	-0.358751	0.652114	585.535	-0.250566	0.816426	182.632	0.34081	0.255878	195.848	0.119608	0.886932	-0.08397	0.7453	none	none	none	none	none	none
ENSMUSG00000022377	Asap1	none	1372.73	-0.352733	0.0606717	705.326	-0.187731	0.62569	626.309	0.0131791	0.994579	321.055	-0.485592	0.0176733	225.688	0.397474	0.469216	-0.2552	0.06503	none	none	none	none	none	none
ENSMUSG00000052632	Asap2	none	409.988	-0.29163	0.396256	556.378	-0.142906	0.782507	184.823	-0.120318	0.975974	249.126	-0.0445916	0.923289	17.5531	-1.24479	0.332755	0.04264	0.8021	none	none	none	none	none	none
ENSMUSG00000036995	Asap3	none	NA	NA	NA	NA	NA	NA	7.08613	-0.326904	0.990737	29.7304	2.28855	2.86589e-07	21.9757	0.187292	0.931085	2.193	6.004e-20	none	none	none	increasing	none	increasing
ENSMUSG00000026311	Asb1	none	68.88	0.0731584	NA	40.9794	-0.0910447	0.959607	26.9959	0.0271543	0.995591	44.4483	-0.0670428	0.921288	7.81126	-0.970861	0.694749	-0.2044	0.1096	none	none	none	none	none	none
ENSMUSG00000031382	Asb11	none	30.508	0.220807	NA	17.7136	1.0023	0.31142	9.14638	0.922902	0.798348	NA	NA	NA	3.70486	0.94036	0.83639	-0.3027	0.5321	none	none	none	none	none	none
ENSMUSG00000033781	Asb13	none	258.995	0.346121	0.362372	135.936	-0.190265	0.761179	216.202	0.584062	0.0675736	89.2709	0.487779	0.110448	45.5596	-0.448957	0.72211	-0.0714	0.671	none	none	none	none	none	none
ENSMUSG00000034768	Asb16	none	7.94266	0.787416	NA	5.6787	-0.906663	NA	11.0911	0.621865	0.922347	6.68559	0.174791	0.911599	NA	NA	NA	-0.4367	0.5274	none	none	none	none	none	none
ENSMUSG00000067081	Asb18	none	NA	NA	NA	11.422	0.933561	NA	6.33039	0.404187	0.980439	NA	NA	NA	NA	NA	NA	-0.03414	0.9642	none	none	none	none	none	none
ENSMUSG00000021200	Asb2	none	13.6888	2.03138	NA	3.06377	3.01052	NA	9.19533	0.522764	0.957654	NA	NA	NA	48.2851	-1.63295	0.0130455	0.6378	0.1073	none	none	none	none	decreasing	none
ENSMUSG00000020305	Asb3	none	215.352	-0.387446	0.352816	268.648	-0.0254764	0.977046	81.7993	0.241155	0.925629	90.6459	-0.462517	0.13045	37.871	0.198886	0.90664	0.01029	0.971	none	none	none	none	none	none
ENSMUSG00000039483	Asb6	none	159.2	0.351326	0.490736	146.962	-0.136845	0.874565	48.4115	-0.0956252	0.993949	43.9517	-0.156331	0.787075	26.5051	-0.114226	0.958012	-0.0356	0.8945	none	none	none	none	none	none
ENSMUSG00000030509	Asb7	none	81.3145	0.162021	NA	70.8767	-0.0621551	0.96757	39.5095	0.0649621	0.994132	70.5907	0.0991051	0.848314	19.1965	-0.153205	0.948479	-0.02805	0.8995	none	none	none	none	none	none
ENSMUSG00000048175	Asb8	none	238.835	0.0783544	0.90307	198.749	-0.211884	0.672292	146.528	0.0368108	0.994132	215.272	0.290313	0.257601	50.5045	0.311932	0.797675	-0.03805	0.8334	none	none	none	none	none	none
ENSMUSG00000044475	Ascc1	none	102.48	-0.0243659	0.98367	120.053	-0.217623	0.730525	102.126	0.139332	0.975974	100.551	0.00134978	0.997332	56.6559	-0.396171	0.697566	0.08021	0.7677	none	none	none	none	none	none
ENSMUSG00000020412	Ascc2	none	74.7834	0.103961	NA	72.5541	0.120166	0.92687	22.8336	-0.131592	0.994132	64.2893	0.60321	0.0748856	45.2841	0.00652286	0.996326	0.02272	0.907	none	none	none	none	none	none
ENSMUSG00000038774	Ascc3	none	283.79	-0.241767	0.576234	409.907	0.229771	0.44934	101.911	0.090897	0.991399	85.3757	0.11861	0.796823	69.145	0.135537	0.914247	0.04282	0.8427	none	none	none	none	none	none
ENSMUSG00000020052	Ascl1	none	11.8028	-0.736891	NA	5.00921	0.0409818	NA	NA	NA	NA	12.8783	1.4474	0.0400956	NA	NA	NA	-0.3017	0.4427	none	none	none	increasing	none	none
ENSMUSG00000019857	Asf1a	none	108.226	-0.201208	0.782047	140.461	-0.126351	0.871423	114.457	-0.0290605	0.994132	190.93	-0.146605	0.63885	41.4379	0.152717	0.922824	0.0718	0.8124	none	none	none	none	none	none
ENSMUSG00000028053	Ash1l	none	1114.36	-0.378536	0.0643138	1333.16	0.0566539	0.917849	554.309	0.0149733	0.994132	383.809	-0.45362	0.0279569	123.715	-0.469772	0.45385	-0.1478	0.3777	none	none	none	none	none	none
ENSMUSG00000031575	Ash2l	none	273.92	-0.190721	0.690716	311.392	-0.0300537	0.97213	218.958	-0.0525097	0.994132	237.959	0.131119	0.667896	108.914	-0.103883	0.928557	-0.08097	0.6077	none	none	none	none	none	none
ENSMUSG00000023017	Asic1	none	314.755	-0.121554	0.801862	62.0569	-0.330077	0.712536	202.493	-0.293928	0.710141	218.271	-0.550986	0.0378778	15.4012	-2.30733	0.0389156	NA	NA	none	none	none	none	decreasing+neuronal	none
ENSMUSG00000020704	Asic2	none	260.64	-0.0978024	0.859784	170.306	-0.129579	0.861656	101.829	0.0602153	0.994132	121.239	0.238675	0.503753	16.6197	-2.29368	0.0673947	NA	NA	none	none	none	none	none	none
ENSMUSG00000033007	Asic4	none	75.25	-0.868937	NA	16.056	-2.09927	0.00789152	44.4832	0.0333268	0.994132	37.8456	-0.0308701	0.97142	NA	NA	NA	NA	NA	none	decreasing	none	none	none	none
ENSMUSG00000025533	Asl	none	70.6809	0.275667	NA	67.5654	-0.20375	0.842341	57.9024	0.404318	0.825377	48.7997	0.520798	0.218919	48.7295	0.500806	0.619886	0.2935	0.1362	none	none	none	none	none	none
ENSMUSG00000052456	Asna1	none	734.411	0.199005	0.502404	543.2	-0.00631176	0.991736	338.3	0.282193	0.663493	336.984	0.363606	0.0879144	118.702	0.343967	0.650925	-0.05974	0.6908	none	none	none	none	none	none
ENSMUSG00000029752	Asns	none	1392.17	0.103337	0.747428	1605.89	0.175029	0.447518	800.19	0.216097	0.723123	158.711	0.0107123	0.983942	75.2544	-1.78979	0.0104999	-0.35	0.0006799	none	none	none	none	decreasing+neuronal	none
ENSMUSG00000026095	Asnsd1	none	NA	NA	NA	4.79873	-0.203202	NA	NA	NA	NA	NA	NA	NA	NA	NA	NA	0.1268	0.527	none	none	none	none	none	none
ENSMUSG00000020774	Aspa	none	19.3376	0.391076	NA	4.54007	0.701139	NA	11.7308	0.153537	0.994132	78.527	0.362003	0.315381	11.3034	-1.5829	0.423461	-0.06422	0.7781	none	none	none	none	none	none
ENSMUSG00000037686	Aspg	none	6.78644	1.09715	NA	2.64695	4.67594	NA	NA	NA	NA	68.1214	3.39612	3.36339e-22	NA	NA	NA	3.952	1.133e-76	none	none	none	increasing	none	increasing
ENSMUSG00000028207	Asph	none	730.432	-0.309382	0.272368	679.001	-0.188236	0.513301	3271.67	-0.54266	0.00588381	1676.16	-0.0919307	0.740037	1426.73	0.648954	0.0199154	0.102	0.4011	none	none	none	none	none	none
ENSMUSG00000046378	Asphd1	none	131.771	-0.0266088	0.979677	103.403	0.0306148	0.980844	52.3284	0.245121	0.957654	26.4297	-0.160884	0.828585	4.52151	-2.22078	0.393773	-0.1866	0.4152	none	none	none	none	none	none
ENSMUSG00000029348	Asphd2	none	153.453	0.152526	0.819542	180.874	0.187075	0.774499	31.3277	0.158433	0.991179	92.8081	-0.106685	0.813667	NA	NA	NA	-0.03165	0.8778	none	none	none	none	none	none
ENSMUSG00000025142	Aspscr1	none	137.96	0.182412	0.796281	90.0703	-0.12392	0.909682	137.6	0.350437	0.656055	117.542	-0.168737	0.676651	58.551	-0.004592	0.99724	0.3001	0.05274	none	none	none	none	none	none
ENSMUSG00000024654	Asrgl1	none	258.647	-0.0131512	0.987089	211.41	0.141544	0.819724	198.227	0.274718	0.732746	3638.57	-0.0497205	0.856313	58.1548	-0.703112	0.440244	0.2091	0.07259	none	none	none	none	none	none
ENSMUSG00000076441	Ass1	none	50.8083	0.533725	NA	24.5263	0.215056	0.917849	19.5811	0.195085	0.991361	29.7334	0.440198	0.426913	18.7853	2.44301	0.0332665	0.5436	1.243e-05	none	none	none	none	increasing	none
ENSMUSG00000032567	Aste1	none	14.8749	-0.646065	NA	20.322	0.483454	0.746474	9.5691	0.247938	0.991399	24.3978	0.257684	0.726572	9.0093	0.333069	0.914495	0.1279	0.6846	none	none	none	none	none	none
ENSMUSG00000026587	Astn1	none	3437.42	0.0339051	0.927672	3050.51	-0.325807	0.0202921	1547.41	-0.278154	0.662929	4142.88	-0.0696605	0.823231	148.045	-1.5914	0.00153677	-0.3326	0.01099	none	none	none	none	decreasing+neuronal	none
ENSMUSG00000028373	Astn2	none	478.239	-0.2765	0.364952	355.837	-0.518079	0.0192914	1682.18	-0.331336	0.418433	627.151	-0.139369	0.599723	51.0464	-2.20278	0.00314174	-0.6055	4.422e-07	none	none	none	none	decreasing+neuronal	none
ENSMUSG00000042548	Asxl1	none	385.016	-0.262608	0.453405	363.578	-0.217179	0.504325	240.428	-0.221401	0.844214	124.881	-0.504409	0.101464	99.4789	-0.226487	0.803608	-0.09648	0.4521	none	none	none	none	none	none
ENSMUSG00000037486	Asxl2	none	140.543	-0.324165	0.554924	154.764	0.400109	0.263528	168.401	-0.330161	0.632818	112.219	-0.394149	0.177497	95.1302	0.484796	0.530645	0.267	0.08759	none	none	none	none	none	none
ENSMUSG00000045215	Asxl3	none	48.3077	-0.645738	NA	42.7496	-0.165111	0.917849	35.6531	-0.0353426	0.994132	22.9633	-0.180938	0.839869	NA	NA	NA	-0.4996	0.02898	none	none	none	none	none	none
ENSMUSG00000013662	Atad1	none	1118.94	-0.2558	0.30411	1570.68	0.0282695	0.967888	1245.26	0.0491614	0.993823	1890.15	-0.0177095	0.960183	309.23	0.210664	0.723112	-0.001237	0.9949	none	none	none	none	none	none
ENSMUSG00000022360	Atad2	none	113.883	-0.191429	0.79312	85.537	0.128131	0.917849	54.0331	-0.0732838	0.994132	16.0617	0.493398	0.518071	41.2643	1.34645	0.0880343	-0.2387	0.2847	none	none	none	none	none	none
ENSMUSG00000052812	Atad2b	none	34.3192	-0.491701	NA	52.0764	0.161534	0.909308	36.632	-0.0560611	0.994132	26.692	-0.479459	0.417896	44.6097	0.438967	0.706844	-0.0394	0.8618	none	none	none	none	none	none
ENSMUSG00000029036	Atad3a	none	99.6025	0.295156	0.671479	93.371	0.149642	0.875173	87.4282	0.0541655	0.994132	74.023	0.262809	0.511156	22.7896	0.848011	0.53639	0.03768	0.8285	none	none	none	none	none	none
ENSMUSG00000017550	Atad5	none	25.9871	0.0706612	NA	44.3511	0.142886	0.932179	20.1475	-0.183402	0.991361	16.541	-0.156963	0.86919	10.5141	0.417344	0.8897	0.3318	0.1588	none	none	none	none	none	none
ENSMUSG00000024426	Atat1	none	212.516	-0.0719588	0.918132	162.095	-0.137742	0.842945	118.499	0.142924	0.970586	147.952	0.391875	0.160233	16.902	-0.723242	0.661692	0.06585	0.6917	none	none	none	none	none	none
ENSMUSG00000034958	Atcay	none	1235.16	0.0577544	0.874715	837.641	-0.243033	0.329253	463.405	0.0804237	0.980439	241.444	-0.152477	0.641169	27.0522	-1.79076	0.0388842	-0.4708	7.801e-06	none	none	none	none	decreasing+neuronal	none
ENSMUSG00000030850	Ate1	none	468.534	-0.0428395	0.942247	714.133	0.131477	0.759062	354.692	0.0815203	0.983338	185.258	-0.269061	0.328107	94.7468	0.0599886	0.963043	-0.1188	0.3259	none	none	none	none	none	none
ENSMUSG00000023027	Atf1	none	16.8589	-0.343358	NA	16.0271	-0.906655	0.503883	10.2182	-0.751595	0.871485	31.4841	-0.313303	0.591829	49.0603	0.116044	0.93673	0.3045	0.1184	none	none	none	none	none	none
ENSMUSG00000027104	Atf2	none	886.646	-0.313221	0.184614	780.772	-0.0473457	0.9346	574.751	-0.202541	0.827883	582.289	-0.295356	0.157195	146.049	0.0730873	0.941659	-0.2279	0.04571	none	none	none	none	none	none
ENSMUSG00000042406	Atf4	none	225.107	-0.650887	0.0307043	200.791	-0.432694	0.218501	260.844	-0.0698491	0.991361	239.669	-0.185593	0.503784	160.898	1.53271	4.06857e-05	-0.3	0.005971	none	none	none	none	increasing	none
ENSMUSG00000038539	Atf5	none	7.02941	0.81781	NA	NA	NA	NA	9.38935	0.0864082	0.994132	39.2917	0.141759	0.838235	5.84986	0.0524098	0.991356	0.2793	0.1026	none	none	none	none	none	none
ENSMUSG00000026663	Atf6	none	585.262	-0.0936046	0.825438	580.673	0.313296	0.161238	378.84	-0.0281123	0.994132	232.298	0.0847226	0.809019	228.285	0.544993	0.227934	-0.04725	0.8131	none	none	none	none	none	none
ENSMUSG00000015461	Atf6b	none	189.175	0.259894	0.613905	200.492	-0.0194202	0.983017	145.591	0.00969551	0.996915	164.386	-0.292703	0.378719	113.595	0.0599096	0.960332	-0.1494	0.4426	none	none	none	none	none	none
ENSMUSG00000099083	Atf7	none	11.8314	0.142314	NA	15.2347	-1.23528	0.218501	23.5863	-0.340101	0.957654	41.1356	0.00771182	0.990956	26.0102	0.543416	0.704878	-0.04725	0.8414	none	none	none	none	none	none
ENSMUSG00000030213	Atf7ip	none	643.054	-0.0312008	0.954345	661.472	0.0542225	0.935363	872.632	-0.334305	0.567162	723.907	-0.0868919	0.775881	431.013	-0.376215	0.38026	-0.006343	0.9734	none	none	none	none	none	none
ENSMUSG00000021619	Atg10	none	67.326	0.0641646	NA	87.9643	-0.0725082	0.953307	60.5059	0.170867	0.977337	80.3086	0.39002	0.270872	40.1853	0.797626	0.393773	0.1146	0.6802	none	none	none	none	none	none
ENSMUSG00000037204	Atg101	none	133.116	0.120064	0.874258	164.604	-0.250811	0.661201	38.395	-0.055914	0.994132	39.4995	-0.252487	0.680271	26.1614	-0.554463	0.700411	NA	NA	none	none	none	none	none	none
ENSMUSG00000032905	Atg12	none	203.298	-0.493305	0.174919	204.852	-0.118074	0.876296	164.743	-0.233601	0.867516	267.095	-0.247237	0.313285	90.3357	0.502037	0.496621	-0.2215	0.05938	none	none	none	none	none	none
ENSMUSG00000027244	Atg13	none	417.626	0.0767441	0.877764	357.643	-0.112076	0.856321	225.556	0.112723	0.977337	144.303	-0.0293224	0.953341	49.1015	-0.102759	0.951771	-0.09856	0.4407	none	none	none	none	none	none
ENSMUSG00000037526	Atg14	none	120.029	0.392516	0.492943	118.72	0.0846819	0.941077	41.7426	-0.0473791	0.994132	47.1742	-0.0729998	0.906658	30.9231	0.169084	0.926459	0.03702	0.8577	none	none	none	none	none	none
ENSMUSG00000026289	Atg16l1	none	382.371	-0.0449818	0.941264	375.115	0.0754619	0.902987	138.348	-0.184116	0.945883	87.4414	-0.2938	0.439827	64.0436	-0.0505677	0.976648	-0.1318	0.3194	none	none	none	none	none	none
ENSMUSG00000047767	Atg16l2	none	20.1145	0.0314981	NA	8.4003	-0.820746	NA	6.90421	0.0257583	0.997323	13.3791	0.0912337	0.935587	12.2598	0.921663	0.639262	-0.1179	0.6213	none	none	none	none	none	none
ENSMUSG00000024773	Atg2a	none	153.979	0.213147	0.717984	105.296	0.244534	0.726635	91.8804	0.175428	0.959289	59.7393	-0.0830767	0.885537	33.9565	-0.792021	0.499169	-0.02042	0.927	none	none	none	none	none	none
ENSMUSG00000041341	Atg2b	none	674.051	0.0765589	0.857652	658.561	0.17104	0.570629	618.365	0.0328836	0.994132	213.051	-0.0938651	0.788384	80.7405	-0.782936	0.241634	-0.1095	0.4553	none	none	none	none	none	none
ENSMUSG00000022663	Atg3	none	408.955	-0.282299	0.42945	494.979	-0.0990217	0.878981	318.431	0.0572716	0.992723	412.424	0.0203832	0.964139	134.16	0.317025	0.721943	-0.09565	0.5773	none	none	none	none	none	none
ENSMUSG00000026280	Atg4b	none	269.656	0.0898172	0.87925	281.117	-0.166122	0.747413	188.682	-0.0198334	0.994132	155.147	0.0261923	0.958729	59.1594	0.207352	0.865327	-0.1825	0.1174	none	none	none	none	none	none
ENSMUSG00000028550	Atg4c	none	247.941	0.0730305	0.912184	266.572	0.125222	0.819724	138.149	0.0603209	0.994132	121.567	-0.124707	0.769516	47.8922	0.176404	0.906691	-0.08526	0.6048	none	none	none	none	none	none
ENSMUSG00000002820	Atg4d	none	32.5884	0.90539	NA	18.2896	0.181492	0.941813	26.4333	0.29115	0.958938	15.01	-0.665196	0.36293	7.04682	-0.468483	0.892038	-0.2352	0.1631	none	none	none	none	none	none
ENSMUSG00000038160	Atg5	none	278.54	-0.0413884	0.957127	249.417	-0.149949	0.78339	149.655	0.307969	0.722692	195.89	-0.180591	0.542874	172.789	1.07441	0.00796908	0.06559	0.7438	none	none	none	none	increasing	none
ENSMUSG00000030314	Atg7	none	184.506	0.147102	0.809854	146.985	0.073895	0.936515	93.3227	0.287724	0.85529	110.172	0.152486	0.707104	69.5446	0.574954	0.475692	0.01818	0.9369	none	none	none	none	none	none
ENSMUSG00000033124	Atg9a	none	718.621	0.0809096	0.833343	491.759	-0.188248	0.61821	382.039	-0.0154657	0.994132	457.91	-0.50481	0.00643845	32.9728	-0.538042	0.66206	-0.2413	0.04461	none	none	none	none	none	none
ENSMUSG00000038295	Atg9b	none	13.6204	-0.332211	NA	4.63363	0.0613782	NA	5.67248	-0.206811	0.994132	9.69655	-0.269241	0.820337	NA	NA	NA	-0.1296	0.7561	none	none	none	none	none	none
ENSMUSG00000026192	Atic	none	245.17	-0.0609201	0.930169	246.128	0.0164549	0.984722	141.978	0.491697	0.298449	150.284	-0.102261	0.794976	96.2233	0.25165	0.783416	0.2089	0.1515	none	none	none	none	none	none
ENSMUSG00000021066	Atl1	none	1676.64	-0.0177841	0.971074	1807.82	0.0705168	0.862086	477.333	0.0216181	0.994132	267.047	-0.230934	0.515878	66.8355	-1.86001	0.000402992	-0.1889	0.08721	none	none	none	none	decreasing+neuronal	none
ENSMUSG00000059811	Atl2	none	567.258	-0.106293	0.786847	545.256	0.167589	0.639297	1412.27	-0.100957	0.962425	480.718	-0.14199	0.584029	85.2529	-0.0769358	0.957212	-0.0794	0.632	none	none	none	none	none	none
ENSMUSG00000024759	Atl3	none	170.963	-0.187228	0.746366	199.079	0.186318	0.726189	57.6111	-0.0716298	0.994132	233.111	0.561772	0.00610579	215.832	0.598597	0.170644	0.252	0.04847	none	none	none	none	none	none
ENSMUSG00000034218	Atm	none	201.912	-0.11596	0.854237	317.313	0.0744778	0.920699	122.329	0.0698793	0.992723	223.85	-0.391996	0.101552	85.1354	-0.0355474	0.982751	-0.04581	0.8028	none	none	none	none	none	none
ENSMUSG00000047388	Atmin	none	373.415	-0.245666	0.534596	230.027	-0.219607	0.61821	200.232	-0.0996036	0.982927	139.227	-0.341851	0.265178	48.806	-0.153336	0.916529	-0.1833	0.1148	none	none	none	none	none	none
ENSMUSG00000018585	Atox1	none	232.891	0.237174	0.620757	270.093	-0.214871	0.578446	276.232	-0.0565329	0.992723	465.824	0.535622	0.00161913	659.686	1.16831	0.000150498	0.2515	0.1558	none	none	none	none	increasing	none
ENSMUSG00000025324	Atp10a	none	NA	NA	NA	NA	NA	NA	NA	NA	NA	4.78425	-0.393153	0.820634	NA	NA	NA	0.6922	0.0004625	none	none	none	none	none	none
ENSMUSG00000055415	Atp10b	none	NA	NA	NA	4.51373	0.589153	NA	NA	NA	NA	NA	NA	NA	NA	NA	NA	-0.5985	0.1133	none	none	none	none	none	none
ENSMUSG00000046808	Atp10d	none	NA	NA	NA	NA	NA	NA	NA	NA	NA	NA	NA	NA	NA	NA	NA	0.6467	0.01166	none	none	none	none	none	none
ENSMUSG00000031441	Atp11a	none	64.3025	-0.00275333	NA	66.1031	0.193504	0.866811	96.4094	0.0948908	0.991361	215.259	1.15092	2.86589e-07	47.9522	-0.297099	0.817516	0.5202	5.076e-07	none	none	none	increasing	none	none
ENSMUSG00000037400	Atp11b	none	172.889	-0.261629	0.620935	188.561	-0.269369	0.548956	166.067	-0.271048	0.839824	233.8	-0.279423	0.346974	95.1659	-0.104328	0.928557	0.4195	0.005436	none	none	none	none	none	none
ENSMUSG00000062949	Atp11c	none	36.3313	-0.456461	NA	73.4191	0.0704993	0.959036	109.146	-0.296152	0.834673	84.024	-0.099126	0.838689	131.305	0.560415	0.338575	0.3515	0.04146	none	none	none	none	none	none
ENSMUSG00000022229	Atp12a	none	NA	NA	NA	NA	NA	NA	NA	NA	NA	NA	NA	NA	NA	NA	NA	NA	NA	none	none	none	none	none	none
ENSMUSG00000031862	Atp13a1	none	276.506	0.0790635	0.895445	263.747	-0.0634771	0.935461	136.524	0.0776906	0.992048	272.367	-0.176213	0.630327	100.237	0.372905	0.626675	0.04815	0.7426	none	none	none	none	none	none
ENSMUSG00000036622	Atp13a2	none	294.98	-0.121617	0.805384	266.544	-0.235191	0.557938	253.487	0.042608	0.994132	125.234	-0.140313	0.715305	135.82	1.49107	0.000201461	0.1289	0.6012	none	none	none	none	increasing	none
ENSMUSG00000022533	Atp13a3	none	338.445	-0.290716	0.427754	545.412	-0.0792765	0.881738	562.075	-0.394113	0.502369	511.294	0.0874478	0.770882	275.616	0.0589149	0.948837	0.1029	0.4768	none	none	none	none	none	none
ENSMUSG00000038094	Atp13a4	none	8.24419	1.44399	NA	NA	NA	NA	6.88872	1.11236	0.777081	735.219	0.335206	0.182795	6.29867	-0.298096	0.936718	1.085	5.221e-19	none	none	none	none	none	increasing
ENSMUSG00000048939	Atp13a5	none	10.0729	0.000700914	NA	NA	NA	NA	NA	NA	NA	12.3236	0.859757	0.292391	NA	NA	NA	0.1237	0.5447	none	none	none	none	none	none
ENSMUSG00000033161	Atp1a1	none	18233.5	-0.091843	0.733623	8805.59	-0.114343	0.685639	4883.1	-0.168344	0.846891	6589.22	-0.208332	0.4112	1503.05	0.244352	0.615512	-0.1066	0.6209	none	none	none	none	none	none
ENSMUSG00000007097	Atp1a2	none	1174.21	0.627363	0.000129994	288.872	0.665401	0.724255	423.046	0.155508	0.958839	79075.3	-0.433644	0.0376345	516.115	-0.955336	0.0389156	0.6913	7.773e-05	none	none	none	none	none	none
ENSMUSG00000040907	Atp1a3	none	30822.7	-0.05676	0.858308	35737.5	-0.323384	0.0142111	51540.8	-0.144308	0.862779	11992	-0.415628	0.0938002	1754.48	-0.41925	0.46437	-0.3238	0.1725	none	none	none	none	none	none
ENSMUSG00000026576	Atp1b1	none	22312.2	-0.103903	0.706598	28299.2	-0.00272249	0.994613	40665.9	-0.224844	0.603069	10916.5	-0.112749	0.730386	754.693	-0.779858	0.0747623	-0.3318	0.07886	none	none	none	none	none	none
ENSMUSG00000041329	Atp1b2	none	2024.27	0.17305	0.459004	1661.49	-0.316104	0.032117	2723.72	-0.440247	0.142978	46733	-0.0728351	0.766399	265.45	0.0587385	0.95201	1.117	1.717e-14	none	none	none	none	none	increasing
ENSMUSG00000032412	Atp1b3	none	237.304	-0.208045	0.681541	240.592	0.364674	0.239881	240.679	-0.281865	0.755542	1174	0.205564	0.368693	742.056	1.01591	0.000201796	0.2671	0.01241	none	none	none	none	increasing	none
ENSMUSG00000025436	Atp23	none	26.8039	-0.393528	NA	25.0299	0.102041	0.967964	28.5692	-0.221088	0.979024	22.8022	-0.111235	0.89655	4.32884	3.42636	0.285835	NA	NA	none	none	none	none	none	none
ENSMUSG00000029467	Atp2a2	none	10904.1	-0.371727	0.0141649	10080.6	-0.255084	0.142016	17272.4	-0.194838	0.665047	7143.23	-0.374131	0.0391771	885.987	-0.876322	0.010365	-0.3591	0.03641	none	none	none	none	none	none
ENSMUSG00000020788	Atp2a3	none	4.6666	-0.0510481	NA	NA	NA	NA	1200.92	-0.0727445	0.989253	15.9366	-0.990623	0.124846	27.1449	-1.08289	0.4172	-0.464	0.0493	none	none	none	none	none	none
ENSMUSG00000019943	Atp2b1	none	7966.4	-0.33113	0.0427298	19273.1	-0.124099	0.759062	1976.44	-0.176515	0.88643	3345.1	-0.328585	0.182913	883.714	0.393021	0.344748	-0.3721	0.04013	none	none	none	none	none	none
ENSMUSG00000030302	Atp2b2	none	7631.51	-0.0959096	0.703118	4255.3	-0.19057	0.295941	8513.67	-0.334947	0.304543	1682.16	-0.669596	0.000856087	314.77	-1.98804	0.049133	-0.4435	0.002976	none	none	none	none	decreasing+neuronal	none
ENSMUSG00000031376	Atp2b3	none	1616.64	-0.0537988	0.878299	2887.18	-0.190739	0.427489	2327.11	-0.0311186	0.994132	528.858	-0.373114	0.148997	96.3716	-1.71895	0.000594769	-0.5028	3.474e-05	none	none	none	none	decreasing+neuronal	none
ENSMUSG00000026463	Atp2b4	none	3289.06	-0.161584	0.482312	842.155	-0.634552	0.518899	194.648	-0.0160371	0.994789	2169.6	-0.107667	0.756753	78.5512	-1.26428	0.0451284	-0.1	0.7782	none	none	none	none	decreasing+neuronal	none
ENSMUSG00000032570	Atp2c1	none	937.627	-0.3264	0.138285	1678.03	-0.139734	0.649929	1108.69	-0.191327	0.825377	1484.81	-0.521979	0.00230288	576.455	-0.033125	0.969757	-0.3192	0.009281	none	none	none	none	none	none
ENSMUSG00000025428	Atp5a1	none	8516.82	0.0727647	0.828944	8888.92	0.0147656	0.979541	8221.01	0.203513	0.765531	3293.1	-0.374012	0.0586901	1026.05	-0.126395	0.823593	-0.1089	0.585	none	none	none	none	none	none
ENSMUSG00000025393	Atp5b	none	7876.4	0.10326	0.688113	9359.27	0.0974048	0.730362	8966.87	0.0135644	0.994132	4226.81	-0.182704	0.400049	1240	-0.161375	0.774055	-0.2252	0.2066	none	none	none	none	none	none
ENSMUSG00000025781	Atp5c1	none	1679.59	0.0630289	0.895445	1832.69	0.0735693	0.874565	1864.11	0.0446067	0.991399	1406.17	-0.264003	0.158157	359.125	-0.0117736	0.990623	-0.0626	0.6721	none	none	none	none	none	none
ENSMUSG00000003072	Atp5d	none	1306.19	0.243474	0.273354	1293.89	-0.207464	0.325669	1023.94	0.160057	0.932376	831.696	-0.14964	0.578093	204.451	0.194904	0.787436	-0.1953	0.2917	none	none	none	none	none	none
ENSMUSG00000016252	Atp5e	none	1152.03	0.26913	0.321023	1039.81	-0.233875	0.45609	1439.92	-0.197768	0.738681	2089.62	0.279965	0.159733	709.635	0.209647	0.693824	-0.1188	0.4743	none	none	none	none	none	none
ENSMUSG00000006057	Atp5g1	none	14.5058	-0.085532	NA	11.0746	0.5411	NA	31.9972	-0.28799	0.966257	11.8706	-0.192066	0.86257	NA	NA	NA	-0.2143	0.07902	none	none	none	none	none	none
ENSMUSG00000018770	Atp5g3	none	2771.14	-0.0185245	0.970346	3148.71	0.139217	0.687296	3417.18	0.0937104	0.957654	2638.05	-0.169558	0.507792	351.936	0.359434	0.43327	-0.1757	0.1487	none	none	none	none	none	none
ENSMUSG00000034566	Atp5h	none	321.164	0.0930715	0.893251	392.799	0.0464435	0.953483	574.972	0.147284	0.939043	382.34	0.005502	0.990114	78.4283	0.115475	0.922824	-0.2447	0.01676	none	none	none	none	none	none
ENSMUSG00000022890	Atp5j	none	1142.2	-0.225106	0.814545	1686.38	0.24424	0.375735	2111.6	0.0104495	0.995591	2002.74	-0.0642806	0.845338	367.778	0.465169	0.255695	-0.1618	0.1975	none	none	none	none	none	none
ENSMUSG00000038690	Atp5j2	none	899.79	0.399489	0.0717501	569.154	-0.295884	0.3352	984.77	-0.0871027	0.967703	1117.82	0.102828	0.697256	358.951	0.187583	0.755823	-0.2427	0.03435	none	none	none	none	none	none
ENSMUSG00000050856	Atp5k	none	586.068	0.27085	0.340405	466.782	-0.187008	0.679431	668.734	-0.0643081	0.988481	814.983	0.121362	0.647382	179.99	0.0186164	0.987781	-0.2747	0.03325	none	none	none	none	none	none
ENSMUSG00000038717	Atp5l	none	NA	NA	NA	NA	NA	NA	6.41301	0.194602	0.994132	4.39251	0.637536	0.685425	NA	NA	NA	-0.1105	0.5458	none	none	none	none	none	none
ENSMUSG00000071528	Atp5md	none	255.895	0.612137	0.513289	186.123	-0.401014	0.383833	203.375	-0.195215	0.908037	199.866	0.241519	0.466562	54.8636	0.285755	0.805584	NA	NA	none	none	none	none	none	none
ENSMUSG00000021290	Atp5mpl	none	1057.71	-0.0455785	0.918132	1136.45	0.159726	0.597468	1518.58	-0.0773584	0.980148	1662.73	0.0372074	0.9039	258.652	0.761864	0.0389156	NA	NA	none	none	none	none	none	none
ENSMUSG00000022956	Atp5o	none	1154.76	0.135126	0.666747	1073.03	-0.242702	0.584415	1471.62	-0.205208	0.749044	1222.73	-0.259245	0.24685	212.117	0.104356	0.907029	-0.2253	0.02656	none	none	none	none	none	none
ENSMUSG00000000563	Atp5pb	none	1026.36	0.125233	0.741176	1190.06	-0.0307792	0.961151	1054.08	-0.113343	0.948922	831.62	-0.138889	0.596936	215.535	-0.0358668	0.974291	NA	NA	none	none	none	none	none	none
ENSMUSG00000019087	Atp6ap1	none	4828.93	0.130883	0.586154	3888.1	-0.139108	0.70641	3794.78	-0.083794	0.975974	5293.95	-0.0733281	0.803187	1868.53	0.569776	0.0389637	-0.05639	0.7505	none	none	none	none	none	none
ENSMUSG00000078958	Atp6ap1l	none	104.386	-0.0572067	0.954345	NA	NA	NA	137.085	-0.356826	0.663493	37.4999	-0.255403	0.653584	NA	NA	NA	-0.4129	0.571	none	none	none	none	none	none
ENSMUSG00000031007	Atp6ap2	none	3845.05	-0.0395393	0.918029	3380.68	0.0737793	0.849577	3646.17	0.0192685	0.994132	2960.15	-0.0736215	0.820623	994.451	0.756778	0.00468039	-0.09492	0.5132	none	none	none	none	none	none
ENSMUSG00000019302	Atp6v0a1	none	4909.46	-0.000588491	0.999806	4636.85	-0.0383624	0.93687	2066.51	0.178011	0.771034	1599.75	-0.167814	0.492088	393.402	-0.229023	0.749679	-0.1531	0.388	none	none	none	none	none	none
ENSMUSG00000038023	Atp6v0a2	none	151.637	0.0723663	0.930975	128.091	0.110946	0.901935	106.01	0.460026	0.45785	569.555	1.16879	4.10941e-09	132.148	-0.19106	0.827459	0.5943	1.078e-07	none	none	none	increasing	none	none
ENSMUSG00000038600	Atp6v0a4	none	4.56972	0.172113	NA	NA	NA	NA	NA	NA	NA	NA	NA	NA	NA	NA	NA	-0.2762	0.5072	none	none	none	none	none	none
ENSMUSG00000033379	Atp6v0b	none	1238.11	-0.17397	0.858522	1154.52	-0.03931	0.953483	1094.67	-0.0312761	0.994132	1451.13	-0.147994	0.580998	313.684	0.482019	0.277911	-0.1004	0.4752	none	none	none	none	none	none
ENSMUSG00000024121	Atp6v0c	none	8.87664	1.16917	NA	6.06098	0.333172	NA	4.82816	-0.273558	0.994132	5.50406	0.661242	0.62949	NA	NA	NA	0.1872	0.4776	none	none	none	none	none	none
ENSMUSG00000013160	Atp6v0d1	none	3755.74	0.198815	0.454067	3578.26	0.1954	0.3352	1423.19	0.247119	0.596213	1310.21	0.151948	0.557508	434.02	0.598066	0.0847598	-0.103	0.4577	none	none	none	none	none	none
ENSMUSG00000015575	Atp6v0e	none	32.3345	0.370531	NA	27.1974	0.205099	0.912606	26.5117	0.22123	0.979472	471.509	0.500734	0.0582299	218.581	1.13233	0.00181478	0.7467	2.686e-07	none	none	none	none	increasing	none
ENSMUSG00000039347	Atp6v0e2	none	634.278	0.195236	0.564633	586.898	0.121544	0.807298	467.414	-0.0146139	0.994132	445.979	0.265235	0.264737	17.7384	-0.0376238	0.989894	-0.2998	0.02264	none	none	none	none	none	none
ENSMUSG00000052459	Atp6v1a	none	5566.18	0.0821425	0.7912	7868.43	0.385548	0.0109416	2645.93	0.297907	0.316154	1181.58	0.226751	0.312224	540.993	0.218364	0.735078	0.02626	0.9097	none	none	none	none	none	none
ENSMUSG00000006273	Atp6v1b2	none	7528.96	0.141874	0.542171	6978	0.0731263	0.84267	3656.3	0.216798	0.59843	1353.76	-0.243214	0.309945	691.523	0.255962	0.62219	-0.09227	0.6409	none	none	none	none	none	none
ENSMUSG00000022295	Atp6v1c1	none	3507.47	0.131038	0.617336	3663.61	-0.0145022	0.982047	2167.71	-0.0109349	0.994877	1180.39	-0.127307	0.616446	768.14	1.01818	0.000209132	-0.1141	0.4077	none	none	none	none	increasing	none
ENSMUSG00000020566	Atp6v1c2	none	7.67064	0.366064	NA	NA	NA	NA	NA	NA	NA	5.01489	0.878193	0.544103	NA	NA	NA	-0.6192	0.2746	none	none	none	none	none	none
ENSMUSG00000021114	Atp6v1d	none	3019.92	-0.0907573	0.779222	2769.88	-0.0543978	0.903483	1342.33	0.00683249	0.995891	829.744	-0.105185	0.742558	277.016	0.522347	0.208942	-0.2251	0.05191	none	none	none	none	none	none
ENSMUSG00000019210	Atp6v1e1	none	5553.65	-0.000523314	0.999806	5964.88	0.196176	0.36189	3718.7	0.118323	0.9471	1875.53	-0.049445	0.89655	431.621	0.576069	0.109937	-0.1237	0.3825	none	none	none	none	none	none
ENSMUSG00000004285	Atp6v1f	none	550	-0.59709	0.0204302	654.229	0.0629303	0.92911	352.482	0.0396857	0.994132	671.707	0.293152	0.115727	270.632	0.739785	0.0668331	0.0242	0.9098	none	none	none	none	none	none
ENSMUSG00000039105	Atp6v1g1	none	98.7942	0.345091	0.615033	34.9691	0.135845	0.942708	75.4526	-0.0395739	0.994132	80.0083	0.820539	0.00512337	112.35	0.454688	0.572515	0.3306	0.0168	none	none	none	none	none	none
ENSMUSG00000024403	Atp6v1g2	none	1520.2	0.245326	0.270968	968.676	-0.189828	0.612498	1133.33	0.0231935	0.994132	488.299	-0.0986848	0.789065	42.2613	-0.307011	0.817516	-0.3493	0.01205	none	none	none	none	none	none
ENSMUSG00000033793	Atp6v1h	none	3728.37	-0.138221	0.642093	4179.56	0.198639	0.508092	2725.79	0.222074	0.716455	1129.43	-0.0354518	0.923157	293.532	0.12831	0.872119	-0.1285	0.3021	none	none	none	none	none	none
ENSMUSG00000033792	Atp7a	none	67.1882	-0.151648	NA	76.7753	-0.0696124	0.959036	75.3928	-0.176798	0.973802	128.595	0.17207	0.626291	335.359	1.07034	0.000583526	0.5337	0.0009878	none	none	none	none	increasing	none
ENSMUSG00000006567	Atp7b	none	6.18349	-1.06842	NA	3.8551	1.06342	NA	10.7813	0.604185	0.920672	56.448	0.392751	0.371336	NA	NA	NA	0.9737	0.0002948	none	none	none	none	none	none
ENSMUSG00000037685	Atp8a1	none	2931.54	-0.0807909	0.790351	3287.4	0.0174272	0.9775	772.857	-0.1438	0.916617	1981.34	-0.19023	0.469983	694.458	0.0132207	0.987781	-0.02523	0.8987	none	none	none	none	none	none
ENSMUSG00000021983	Atp8a2	none	440.045	-0.153006	0.698422	239.473	-0.412658	0.187161	721.34	-0.0820789	0.977337	163.732	-0.341388	0.356061	280.674	-0.707667	0.0482116	-0.1328	0.6351	none	none	none	none	none	none
ENSMUSG00000039529	Atp8b1	none	12.7267	-0.886149	NA	NA	NA	NA	NA	NA	NA	5.80263	0.0866096	0.965808	17.731	2.17901	0.0801827	0.6091	0.06859	none	none	none	none	none	none
ENSMUSG00000060671	Atp8b2	none	82.6477	0.723799	NA	63.1296	0.64913	0.212639	68.5388	0.385399	0.768143	45.6719	0.127266	0.833851	15.1114	-1.59239	0.205646	-0.009129	0.9614	none	none	none	none	none	none
ENSMUSG00000027546	Atp9a	none	1912.62	0.0496097	0.890399	1652.91	-0.154003	0.527617	673.567	0.0135896	0.994132	696.618	0.192852	0.520396	86.0293	-1.86248	0.000207814	-0.2667	0.08893	none	none	none	none	decreasing+neuronal	none
ENSMUSG00000024566	Atp9b	none	305.634	0.0121362	0.987239	349.291	-0.384904	0.0984765	173.708	0.00766393	0.997183	212.527	0.103282	0.801076	95.2204	0.0663285	0.960332	-0.103	0.4027	none	none	none	none	none	none
ENSMUSG00000028710	Atpaf1	none	6.50418	0.644034	NA	NA	NA	NA	7.57889	0.0422379	0.995591	NA	NA	NA	NA	NA	NA	-0.1723	0.3365	none	none	none	none	none	none
ENSMUSG00000042709	Atpaf2	none	87.0508	0.129324	NA	57.3008	0.185709	0.874378	63.904	-0.262039	0.937426	56.5717	0.643785	0.0755004	22.166	0.374966	0.83164	-0.06528	0.7494	none	none	none	none	none	none
ENSMUSG00000054428	Atpif1	none	1017.85	0.181784	0.511689	588.053	-0.0929672	0.851	807.405	-0.403132	0.173756	427.012	0.151704	0.544655	219.632	0.529648	0.259367	-0.2385	0.07983	none	none	none	none	none	none
ENSMUSG00000039065	Atpsckmt	none	22.6333	-0.288981	NA	13.8878	-0.116018	0.970437	23.2555	-0.00155742	0.998648	35.4589	-0.170666	0.80007	9.55416	-0.555132	0.829348	NA	NA	none	none	none	none	none	none
ENSMUSG00000032409	Atr	none	94.3249	-0.215929	NA	88.2053	0.0438387	0.975088	145.514	-0.376549	0.641752	162.683	-0.508839	0.0552801	106.736	-0.130292	0.903743	0.3271	0.06668	none	none	none	none	none	none
ENSMUSG00000013622	Atraid	none	264.027	0.185329	0.710281	324.656	0.0121998	0.988347	217.918	0.0806466	0.991361	1050.47	0.0367376	0.903619	351.664	0.568315	0.228766	NA	NA	none	none	none	none	none	none
ENSMUSG00000027312	Atrn	none	1595.88	-0.230275	0.312965	1886.25	-0.166297	0.571253	1141.41	-0.476065	0.825377	1512.8	-0.425332	0.0637475	180.364	-0.00728889	0.993629	-0.2093	0.1336	none	none	none	none	none	none
ENSMUSG00000054843	Atrnl1	none	940.53	-0.0489863	0.912544	673.886	-0.0868594	0.861572	1600.78	-0.370816	0.935569	524.464	-0.308771	0.238656	63.954	-0.789321	0.270154	-0.4875	4.26e-06	none	none	none	none	none	none
ENSMUSG00000031229	Atrx	none	2362.85	-0.392466	0.0136131	3292.33	0.211298	0.473136	1232.2	-0.0512297	0.991361	568.624	-0.572573	0.00139756	383.646	0.0321843	0.97384	-0.004876	0.982	none	none	none	none	none	none
ENSMUSG00000046876	Atxn1	none	416.766	-0.40478	0.150785	290.243	-0.264093	0.481187	130.612	-0.081602	0.991361	178.152	-0.416014	0.112675	41.6283	-0.189108	0.90511	-0.3107	0.005607	none	none	none	none	none	none
ENSMUSG00000016541	Atxn10	none	2711.27	0.135224	0.654636	4001.48	0.187395	0.463084	1717.1	0.261107	0.580072	1181.32	0.0303691	0.93049	406.069	0.140122	0.831999	-0.07573	0.6398	none	none	none	none	none	none
ENSMUSG00000069895	Atxn1l	none	73.2368	0.0937035	NA	59.348	0.137832	0.915139	47.2043	-0.0918583	0.994132	87.8532	0.549549	0.0885447	36.3298	0.38907	0.775548	0.05778	0.7012	none	none	none	none	none	none
ENSMUSG00000042605	Atxn2	none	1094.83	-0.339713	0.0942457	1039.25	-0.0522521	0.932179	833.76	-0.0140544	0.994132	433.963	-0.609378	0.000858624	144.103	-0.281271	0.702299	-0.1479	0.1913	none	none	none	none	none	none
ENSMUSG00000032637	Atxn2l	none	656.458	-0.0501013	0.917236	591.743	-0.0328486	0.962013	419.587	-0.0824385	0.983491	255.683	-0.586538	0.00322943	207.188	-0.150717	0.844293	-0.05284	0.7429	none	none	none	none	none	none
ENSMUSG00000021189	Atxn3	none	129.641	-0.278541	0.673024	134.286	0.277747	0.584369	52.1874	0.286635	0.939405	60.0408	-0.0614789	0.917331	63.4253	0.761334	0.293791	0.03355	0.8574	none	none	none	none	none	none
ENSMUSG00000021738	Atxn7	none	25.8719	0.184892	NA	29.4468	0.153771	0.935363	18.0365	0.0968129	0.994132	45.2725	-0.157364	0.790107	22.7126	0.277937	0.888703	-0.08356	0.66	none	none	none	none	none	none
ENSMUSG00000020564	Atxn7l1	none	160.455	0.00587766	0.996434	165.869	0.114441	0.881738	91.8088	-0.354783	0.739079	124.202	-0.402537	0.162314	57.6198	0.297857	0.790343	-0.1592	0.2948	none	none	none	none	none	none
ENSMUSG00000048997	Atxn7l2	none	43.3419	-0.136636	NA	31.9762	0.365024	0.774233	8.47715	-0.934651	0.801624	10.5788	-0.0427719	0.976683	NA	NA	NA	-0.01785	0.9357	none	none	none	none	none	none
ENSMUSG00000059995	Atxn7l3	none	177.663	0.38359	0.39279	128.524	-0.113201	0.906641	83.5586	-0.0715289	0.994132	73.6586	0.11497	0.815864	23.8984	-0.351465	0.845436	-0.3059	0.0114	none	none	none	none	none	none
ENSMUSG00000074748	Atxn7l3b	none	494.845	0.149274	0.71364	423.7	-0.207815	0.597128	219.238	-0.119979	0.966257	408.977	-0.187934	0.442691	87.2947	0.0502332	0.974305	-0.3127	0.003492	none	none	none	none	none	none
ENSMUSG00000078584	AU022252	none	53.6068	-0.130111	NA	50.7423	0.189376	0.882644	46.5444	-0.0279076	0.994877	87.9979	-0.569128	0.0550852	14.9838	-0.25337	0.922301	-0.07872	0.7151	none	none	none	none	none	none
ENSMUSG00000109890	AU023762	none	6.68885	-1.04183	NA	NA	NA	NA	NA	NA	NA	NA	NA	NA	NA	NA	NA	-0.01766	0.9852	none	none	none	none	none	none
ENSMUSG00000028830	AU040320	none	486.643	0.147464	0.704251	405.132	0.00563727	0.993322	455.23	-0.344476	0.579609	567.927	-0.140367	0.609809	151.145	0.0448952	0.97034	-0.006899	0.9723	none	none	none	none	none	none
ENSMUSG00000078435	AU041133	none	32.4028	-0.685201	NA	64.5184	-0.145675	0.926634	24.9681	0.363982	0.950882	14.5854	0.325741	0.721304	8.45332	0.0341711	0.992384	0.2516	0.456	none	none	none	none	none	none
ENSMUSG00000021460	Auh	none	374.516	-0.144786	0.733259	341.747	-0.205549	0.567241	550.668	0.0609311	0.991361	176.337	0.138781	0.704047	48.2263	-0.2738	0.826701	-0.1125	0.4564	none	none	none	none	none	none
ENSMUSG00000068328	Aup1	none	112.009	-0.063405	0.948615	99.2973	-0.169132	0.856494	70.0175	-0.146575	0.980439	146.394	0.018401	0.976038	134.17	0.0996312	0.922165	0.1231	0.3772	none	none	none	none	none	none
ENSMUSG00000027496	Aurka	none	6.63002	-0.444253	NA	10.4411	0.778746	NA	8.67988	0.388128	0.980439	NA	NA	NA	NA	NA	NA	0.5281	0.2032	none	none	none	none	none	none
ENSMUSG00000065990	Aurkaip1	none	291.703	-0.220848	0.620935	267.405	-0.0711705	0.924479	219.422	0.0919688	0.983338	231.293	0.10211	0.760041	56.817	1.28165	0.0480459	-0.1256	0.4636	none	none	none	none	increasing	none
ENSMUSG00000029673	Auts2	none	373.277	0.157057	0.738573	406.215	0.106431	0.833897	311.546	-0.168649	0.924628	128.185	-0.872016	0.00027654	21.1575	-2.20686	0.0400217	-0.1753	0.2047	none	none	none	none	decreasing+neuronal	none
ENSMUSG00000003604	Aven	none	23.9835	0.0656535	NA	16.0487	-0.102579	0.971944	18.5894	-0.122631	0.994132	20.2616	-0.0520509	0.959155	15.6131	-1.01827	0.539944	-0.4588	0.08238	none	none	none	none	none	none
ENSMUSG00000029787	Avl9	none	383.305	-0.0555701	0.92198	437.437	0.189854	0.566348	224.711	0.267629	0.732746	237.836	0.127932	0.684959	88.1655	-0.00267436	0.997705	-0.05139	0.7632	none	none	none	none	none	none
ENSMUSG00000037727	Avp	none	10.6465	1.75665	NA	NA	NA	NA	7.66206	0.448735	0.975974	11.0381	1.56387	0.0372813	3.62393	0.0855531	0.989301	NA	NA	none	none	none	increasing	none	none
ENSMUSG00000018821	Avpi1	none	143.832	-0.0249331	0.980345	69.7698	-0.367368	0.58586	69.4179	0.0400241	0.994132	81.0161	1.29302	1.0319e-05	8.94582	0.32466	0.918751	0.3865	0.07387	none	none	none	increasing	none	none
ENSMUSG00000078349	AW011738	none	4.94859	0.216303	NA	NA	NA	NA	9.63935	-0.342227	0.980439	25.2618	-0.811717	0.11949	NA	NA	NA	0.0318	0.9383	none	none	none	none	none	none
ENSMUSG00000097428	AW047730	none	12.6685	-0.600984	NA	NA	NA	NA	4.58887	0.781577	0.957654	364.581	-0.344257	0.137779	NA	NA	NA	NA	NA	none	none	none	none	none	none
ENSMUSG00000074166	AW146154	none	19.0937	-0.624979	NA	34.0255	0.54225	0.549493	12.7522	0.0170489	0.997323	32.4241	0.0674228	0.930199	14.8558	0.391991	0.859562	0.1818	0.5599	none	none	none	none	none	none
ENSMUSG00000039182	AW209491	none	160.795	-0.22274	0.695168	164.228	-0.0393861	0.970437	127.984	-0.0217497	0.994132	94.0829	-0.17768	0.666597	21.6196	0.659514	0.663362	-0.146	0.4208	none	none	none	none	none	none
ENSMUSG00000087334	AW495222	none	12.8135	0.922503	NA	3.6551	-0.443078	NA	7.15155	0.211868	0.994132	5.25107	0.0216017	0.990199	NA	NA	NA	-0.3425	0.4656	none	none	none	none	none	none
ENSMUSG00000041935	AW549877	none	202.063	0.0441223	0.954345	187.659	-0.261755	0.565465	136.74	-0.156449	0.964767	387.358	-0.0220538	0.956038	100.191	0.64042	0.318963	0.2108	0.07306	none	none	none	none	none	none
ENSMUSG00000038112	AW551984	none	30.3327	-0.302577	NA	8.88144	-0.227024	NA	6.03201	-0.454097	0.980148	57.1064	-0.151973	0.785141	NA	NA	NA	0.1106	0.8227	none	none	none	none	none	none
ENSMUSG00000033632	AW554918	none	48.455	-0.144546	NA	55.005	-0.154964	0.907404	41.4025	0.279858	0.948922	47.907	0.063239	0.923289	21.3185	0.61867	0.700076	0.01763	0.9499	none	none	none	none	none	none
ENSMUSG00000024182	Axin1	none	89.8504	0.173932	NA	92.0015	0.0655948	0.957396	36.9403	-0.417471	0.871485	75.4351	0.0335903	0.959371	37.824	0.118183	0.943628	-0.03074	0.8855	none	none	none	none	none	none
ENSMUSG00000000142	Axin2	none	65.9339	0.16368	NA	40.0799	-0.141208	0.935461	20.2641	0.0256289	0.995591	54.9994	-0.367964	0.373423	5.89484	-2.57533	0.221234	-0.007667	0.9758	none	none	none	none	none	none
ENSMUSG00000002602	Axl	none	29.1962	0.906645	NA	6.78288	0.673146	NA	15.4447	0.923678	0.630486	1763.16	-0.327801	0.171029	1307.61	3.52136	2.15619e-49	1.702	5.582e-51	none	none	none	none	increasing	increasing
ENSMUSG00000039285	Azi2	none	172.751	-0.0925012	0.897903	151.391	-0.0176223	0.985895	198.307	-0.18151	0.939405	167.379	-0.0332271	0.943568	66.6605	0.181714	0.878879	-0.2928	0.01826	none	none	none	none	none	none
ENSMUSG00000037458	Azin1	none	920.811	-0.20783	0.48244	912.018	0.173154	0.566102	822.773	0.128616	0.940643	731.519	0.341123	0.117289	218.231	0.731037	0.0641752	0.2518	0.03285	none	none	none	none	none	none
ENSMUSG00000028789	Azin2	none	86.9252	0.321746	NA	46.8324	-0.0384345	0.982009	61.4097	0.439549	0.802139	36.0179	1.91769	2.83637e-06	6.4947	-0.507331	0.880759	NA	NA	none	none	none	increasing	none	none
ENSMUSG00000093606	B130034C11Rik	none	4.62798	0.305254	NA	3.62405	0.216094	NA	NA	NA	NA	5.39758	0.315628	0.843017	NA	NA	NA	0.04344	0.9392	none	none	none	none	none	none
ENSMUSG00000097414	B130046B21Rik	none	9.18759	0.353535	NA	6.51554	0.510687	NA	NA	NA	NA	3.27288	-0.568922	0.789065	NA	NA	NA	NA	NA	none	none	none	none	none	none
ENSMUSG00000086502	B130055M24Rik	none	11.4529	0.153714	NA	8.24695	-0.271768	NA	3.2133	0.272541	0.994132	12.1168	-0.305674	0.765591	NA	NA	NA	NA	NA	none	none	none	none	none	none
ENSMUSG00000097547	B230110C06Rik	none	NA	NA	NA	NA	NA	NA	NA	NA	NA	NA	NA	NA	NA	NA	NA	NA	NA	none	none	none	none	none	none
ENSMUSG00000027165	B230118H07Rik	none	191.218	-0.0643894	0.937383	211.228	-0.312303	0.364206	159.863	0.229419	0.897464	260.993	0.107539	0.729582	53.9122	-0.0489743	0.979448	0.03199	0.8907	none	none	none	none	none	none
ENSMUSG00000086003	B230206L02Rik	none	4.68561	-0.00569794	NA	NA	NA	NA	7.56663	0.324682	0.98964	7.72186	0.171705	0.90358	NA	NA	NA	NA	NA	none	none	none	none	none	none
ENSMUSG00000097378	B230208H11Rik	none	973.475	0.0916375	0.978261	532.024	1.25574	0.345844	300.031	-0.0437712	0.994132	466.474	0.000476253	0.999131	152.751	0.14422	0.869423	NA	NA	none	none	none	none	none	none
ENSMUSG00000109006	B230209E15Rik	none	380.943	-0.327683	0.29188	204.307	-0.232787	0.590302	60.6168	0.0697962	0.994132	169.317	-0.0561475	0.901317	8.71051	-1.09482	0.613134	-0.5203	0.0001905	none	none	none	none	none	none
ENSMUSG00000089706	B230216N24Rik	none	34.0175	-0.306204	NA	12.458	-0.57357	0.767362	NA	NA	NA	21.8973	-0.338255	0.65548	NA	NA	NA	-0.2866	0.5803	none	none	none	none	none	none
ENSMUSG00000050538	B230217C12Rik	none	111.007	-0.0992225	0.913396	123.989	-0.553417	0.108795	138.787	-0.213102	0.920035	63.9244	-0.485272	0.184934	7.06982	-0.931705	0.732968	-0.543	1.818e-06	none	none	none	none	none	none
ENSMUSG00000097785	B230217O12Rik	none	69.8836	-0.261145	NA	45.1865	-0.328361	0.754472	33.3902	-0.361715	0.918876	33.9537	0.141762	0.832301	NA	NA	NA	-0.1458	0.5279	none	none	none	none	none	none
ENSMUSG00000045767	B230219D22Rik	none	422.811	-0.209057	0.574179	397.554	0.158387	0.70226	362.789	-0.101304	0.968528	256.292	-0.153283	0.59196	150.839	0.470486	0.473886	-0.1689	0.1757	none	none	none	none	none	none
ENSMUSG00000113701	B230303A05Rik	none	68.1937	0.0854672	NA	168.007	-0.0873372	0.917849	26.8823	0.0039418	0.99783	53.759	-0.281766	0.578093	NA	NA	NA	NA	NA	none	none	none	none	none	none
ENSMUSG00000080717	B230307C23Rik	none	12.1814	-0.284367	NA	11.4396	0.292672	NA	14.8454	-0.351121	0.967156	15.5112	0.329836	0.704122	4.98882	0.332424	0.936982	NA	NA	none	none	none	none	none	none
ENSMUSG00000104597	B230334C09Rik	none	NA	NA	NA	NA	NA	NA	NA	NA	NA	NA	NA	NA	4.35695	-4.62734	0.100602	NA	NA	none	none	none	none	none	none
ENSMUSG00000097119	B230354K17Rik	none	42.1166	-0.200848	NA	38.3149	0.00445091	0.9975	32.2606	0.142979	0.991361	57.794	-0.309346	0.476763	14.1689	-0.943015	0.570509	NA	NA	none	none	none	none	none	none
ENSMUSG00000086350	B230369F24Rik	none	10.7334	-0.287085	NA	12.4059	-0.150835	0.96229	13.0843	-0.706493	0.853199	12.1198	-0.726374	0.376873	NA	NA	NA	NA	NA	none	none	none	none	none	none
ENSMUSG00000060802	B2m	none	679.067	0.502764	0.078819	512.81	-0.0867301	0.904709	388.591	0.226815	0.768394	4461.09	0.312989	0.167284	30323	1.2021	2.15605e-08	2.479	1.244e-72	none	none	none	none	increasing	increasing
ENSMUSG00000043300	B3galnt1	none	634.371	-0.448685	0.0567435	535.113	-0.0353567	0.956775	359.654	-0.146372	0.957654	342.945	-0.514746	0.0461604	146.298	0.407523	0.50613	-0.3218	0.01247	none	none	none	none	none	none
ENSMUSG00000039242	B3galnt2	none	19.5213	-0.519814	NA	20.147	-0.357862	0.844342	34.3207	-0.321664	0.939405	34.008	0.0181504	0.982731	14.8732	0.284546	0.907029	0.09275	0.628	none	none	none	none	none	none
ENSMUSG00000034780	B3galt1	none	231.842	-0.172389	0.73384	228.723	-0.167592	0.748672	140.138	-0.211619	0.9512	293.357	-0.172309	0.569802	8.83355	0.0483909	0.990867	-0.2966	0.01724	none	none	none	none	none	none
ENSMUSG00000033849	B3galt2	none	809.559	-0.719711	0.000233046	849.658	-0.534042	0.00331129	453.352	-0.00261101	0.997356	738.454	-0.153299	0.558116	23.4316	-1.33133	0.20529	-0.2679	0.1262	none	none	none	none	none	none
ENSMUSG00000067370	B3galt4	none	16.1775	0.562433	NA	16.5025	-0.177276	0.947779	13.943	0.165619	0.993949	15.8072	-0.456148	0.568818	19.2347	0.865511	0.583974	-0.03504	0.9461	none	none	none	none	none	none
ENSMUSG00000074892	B3galt5	none	76.5047	-0.131476	NA	170.912	-0.118089	0.899293	249.794	-0.0998692	0.977729	229.641	-0.242438	0.405248	76.9173	0.647582	0.350042	-0.05107	0.7604	none	none	none	none	none	none
ENSMUSG00000050796	B3galt6	none	53.0924	-0.209083	NA	55.9854	-0.375515	0.634563	30.3107	0.542878	0.775209	34.8656	-0.277161	0.681307	14.5733	0.672189	0.736084	-0.3471	0.1064	none	none	none	none	none	none
ENSMUSG00000045994	B3gat1	none	354.811	0.196219	0.636197	383.656	-0.12331	0.827037	162.549	-0.187388	0.950864	172.633	0.013711	0.980064	19.491	-1.70717	0.141458	-0.3639	0.002461	none	none	none	none	none	none
ENSMUSG00000026156	B3gat2	none	67.6557	-0.182791	NA	41.1004	-1.11716	0.0193643	40.2661	0.0205563	0.995591	89.5657	0.459278	0.160262	5.2225	-2.01162	0.423252	-0.5786	0.001594	none	decreasing	none	none	none	none
ENSMUSG00000071649	B3gat3	none	187.189	0.235951	0.652615	97.294	-0.289665	0.640613	125.011	-0.325135	0.729952	164.428	0.0741129	0.870471	39.3855	-0.562007	0.599753	-0.2398	0.08337	none	none	none	none	none	none
ENSMUSG00000051950	B3glct	none	138.296	-0.0793648	0.926976	92.8918	-0.18141	0.855763	164.266	-0.560854	0.218812	344.154	-0.0133656	0.976038	59.7278	0.0971057	0.947979	NA	NA	none	none	none	none	none	none
ENSMUSG00000079445	B3gnt7	none	NA	NA	NA	NA	NA	NA	NA	NA	NA	5.64735	1.3766	0.254924	41.754	3.18428	1.61412e-05	1.489	2.709e-05	none	none	none	none	increasing	increasing
ENSMUSG00000069920	B3gnt9	none	NA	NA	NA	NA	NA	NA	NA	NA	NA	2.86194	1.66117	0.371512	NA	NA	NA	NA	NA	none	none	none	none	none	none
ENSMUSG00000046605	B3gntl1	none	17.033	-0.244766	NA	16.6844	-0.322739	0.880376	5.11971	-0.920226	0.922347	12.5545	0.155674	0.888794	8.8166	-2.30033	0.187928	0.09463	0.7128	none	none	none	none	none	none
ENSMUSG00000053706	B430305J03Rik	none	9.19743	0.0530319	NA	5.47489	0.260452	NA	NA	NA	NA	6.45507	-0.030661	0.986476	NA	NA	NA	NA	NA	none	none	none	none	none	none
ENSMUSG00000006731	B4galnt1	none	392.152	0.0807494	0.869979	297.792	0.00364562	0.995699	157.649	-0.0242695	0.994132	141.606	0.147251	0.705496	92.159	1.15189	0.0262845	-0.2401	0.02148	none	none	none	none	increasing	none
ENSMUSG00000041372	B4galnt3	none	4.56956	-0.983235	NA	NA	NA	NA	13.8827	-0.234309	0.991361	NA	NA	NA	NA	NA	NA	-0.8561	0.027	none	none	none	none	none	none
ENSMUSG00000055629	B4galnt4	none	160.165	0.374395	0.484929	134.653	0.179124	0.789096	69.1682	0.170459	0.976814	93.4711	-0.128816	0.808316	NA	NA	NA	0.1517	0.3165	none	none	none	none	none	none
ENSMUSG00000028541	B4galt2	none	67.9775	0.17588	NA	38.029	0.201905	0.89128	14.8183	-0.369368	0.968305	34.957	0.047778	0.950898	NA	NA	NA	-0.2304	0.06391	none	none	none	none	none	none
ENSMUSG00000052423	B4galt3	none	116.917	-0.120237	0.883103	98.9601	-0.066869	0.958821	72.5329	-0.494438	0.559396	76.2509	0.0838922	0.889917	19.0309	-0.807798	0.640558	-0.09032	0.5809	none	none	none	none	none	none
ENSMUSG00000022793	B4galt4	none	62.6564	0.215564	NA	95.5087	0.25237	0.748092	46.4929	-0.575085	0.622606	231.5	0.177789	0.580595	96.2172	-0.734434	0.186048	0.1269	0.5215	none	none	none	none	none	none
ENSMUSG00000017929	B4galt5	none	297.614	-0.0487138	0.941395	251.328	-0.274365	0.528863	407.932	-0.574681	0.170316	278.507	0.019622	0.965927	69.325	1.0078	0.102724	-0.08818	0.5545	none	none	none	none	none	none
ENSMUSG00000056124	B4galt6	none	615.113	0.171819	0.622022	755.259	0.0441739	0.952539	633.974	-0.342903	0.574177	446.79	-0.371398	0.163224	98.5344	-0.0114547	0.992396	-0.174	0.1627	none	none	none	none	none	none
ENSMUSG00000021504	B4galt7	none	42.8639	0.499293	NA	33.0522	-0.419875	0.691248	38.5802	-0.00104601	0.99895	37.8863	-0.429355	0.397953	15.8781	0.887797	0.618057	-0.1579	0.4387	none	none	none	none	none	none
ENSMUSG00000047379	B4gat1	none	1079.64	-0.198952	0.502404	991.513	-0.306636	0.159528	624.618	-0.121616	0.958876	920.319	-0.187431	0.447729	146.867	-0.414606	0.498074	NA	NA	none	none	none	none	none	none
ENSMUSG00000052364	B630019K06Rik	none	73.1976	-0.106364	NA	53.3146	-0.230291	0.83616	62.4753	0.449187	0.768394	36.3253	-0.0284299	0.973253	NA	NA	NA	-0.4072	0.007585	none	none	none	none	none	none
ENSMUSG00000097734	B930082K07Rik	none	4.79298	0.527713	NA	4.54913	-0.532026	NA	NA	NA	NA	5.73807	0.785732	0.540014	NA	NA	NA	NA	NA	none	none	none	none	none	none
ENSMUSG00000001039	B9d1	none	48.7958	0.524967	NA	40.9731	0.211256	0.904661	15.9243	0.801509	0.722692	84.3043	0.548276	0.104517	7.2372	-1.52912	0.490408	0.2432	0.2565	none	none	none	none	none	none
ENSMUSG00000063439	B9d2	none	80.8199	0.261626	NA	74.2564	0.10555	0.935363	36.0731	0.394535	0.890571	40.783	0.0116638	0.986884	16.4706	0.308324	0.892841	0.2192	0.4309	none	none	none	none	none	none
ENSMUSG00000022296	Baalc	none	237.877	0.182097	0.733623	104.316	-0.0214294	0.986191	44.0326	0.154465	0.986324	596.103	-0.483751	0.00566264	16.6174	-2.68545	0.0168174	-0.1062	0.4529	none	none	none	none	decreasing+neuronal	none
ENSMUSG00000031820	Babam1	none	274.126	0.244016	0.561263	259.176	-0.00632621	0.993322	156.532	0.125674	0.973802	167.113	0.247802	0.397898	66.222	0.370229	0.712021	NA	NA	none	none	none	none	none	none
ENSMUSG00000052139	Babam2	none	249.576	-0.02222	0.977701	376.078	0.298632	0.259672	136.51	0.233027	0.902699	119.815	0.0264909	0.958088	82.3859	0.377845	0.663362	NA	NA	none	none	none	none	none	none
ENSMUSG00000032086	Bace1	none	324.322	0.213299	0.606812	321.662	-0.217291	0.586558	360.796	-0.196031	0.875278	232.999	0.0811106	0.820337	24.3135	-1.97567	0.0358809	-0.2214	0.03574	none	none	none	none	decreasing+neuronal	none
ENSMUSG00000040605	Bace2	none	17.5977	0.159643	NA	5.9768	0.211524	NA	9.11036	0.443226	0.968305	70.8508	1.87142	7.4697e-11	NA	NA	NA	2.311	2.692e-11	none	none	none	increasing	none	increasing
ENSMUSG00000025612	Bach1	none	31.5782	0.729681	NA	22.5258	0.780765	0.42349	38.1705	-0.0384244	0.994132	56.8084	0.68406	0.0611749	224.916	0.385284	0.540897	0.7157	5.394e-09	none	none	none	none	none	none
ENSMUSG00000040270	Bach2	none	6.96116	0.368951	NA	6.71176	-0.0329052	NA	5.26853	0.120034	0.994132	12.3738	0.194585	0.853548	18.7285	0.310506	0.8857	-0.1101	0.597	none	none	none	none	none	none
ENSMUSG00000024959	Bad	none	66.3341	0.151912	NA	53.8313	-0.213647	0.856321	42.5103	0.120736	0.991361	83.6785	0.180947	0.662021	29.1432	0.210994	0.908635	0.0723	0.8066	none	none	none	none	none	none
ENSMUSG00000028416	Bag1	none	87.0996	0.0588756	NA	65.4524	-0.382374	0.570629	118.508	0.154073	0.962425	122.447	0.0301551	0.951443	125.258	0.373819	0.583974	-0.1426	0.2628	none	none	none	none	none	none
ENSMUSG00000042215	Bag2	none	48.6971	0.0519993	NA	35.6833	-0.393191	0.712671	36.9107	-0.140088	0.991361	32.5704	-0.232033	0.707869	NA	NA	NA	-0.3025	0.2162	none	none	none	none	none	none
ENSMUSG00000030847	Bag3	none	10.2666	-0.430801	NA	43.3991	0.350286	0.761104	131.671	0.306316	0.818998	144.219	0.720769	0.00370415	61.3581	-0.372355	0.735247	0.8927	7.739e-07	none	none	none	none	none	none
ENSMUSG00000037316	Bag4	none	413.02	-0.156217	0.705361	489.158	0.170374	0.680644	116.478	-0.209098	0.939405	94.8309	-0.0533875	0.921288	23.1658	0.883781	0.497848	0.02426	0.8858	none	none	none	none	none	none
ENSMUSG00000049792	Bag5	none	409.692	-0.00947578	0.990064	342.572	0.0643382	0.930872	215.182	-0.170558	0.943961	160.211	-0.0145877	0.978529	57.0705	0.179287	0.890313	-0.123	0.4334	none	none	none	none	none	none
ENSMUSG00000024392	Bag6	none	1709.01	0.292737	0.143073	1213.08	0.13211	0.68402	1410.11	-0.0796628	0.979024	968.155	-0.193281	0.33084	415.235	-0.0826364	0.912164	-0.03599	0.8495	none	none	none	none	none	none
ENSMUSG00000039741	Bahcc1	none	41.3492	-0.0236425	NA	33.018	-0.0746103	0.970437	29.0874	-0.137819	0.991399	22.4005	0.231277	0.770882	NA	NA	NA	-0.2593	0.2607	none	none	none	none	none	none
ENSMUSG00000040007	Bahd1	none	251.495	-0.105862	0.853989	326.416	0.0732895	0.935111	60.7494	0.0316026	0.994132	59.5813	-0.299104	0.507768	46.201	0.298591	0.825982	-0.04232	0.8313	none	none	none	none	none	none
ENSMUSG00000025372	Baiap2	none	2360.35	-0.10718	0.695635	2627.37	-0.0116677	0.982047	729.904	0.0410535	0.994132	311.304	-0.351374	0.262756	52.9737	-0.563001	0.547275	-0.1757	0.2267	none	none	none	none	none	none
ENSMUSG00000018126	Baiap2l2	none	5.51257	0.304733	NA	NA	NA	NA	NA	NA	NA	NA	NA	NA	5.39716	5.27166	0.0438414	-0.5063	0.2927	none	none	none	none	increasing	none
ENSMUSG00000047507	Baiap3	none	64.3166	-0.270871	NA	8.39119	0.518706	NA	11.3896	0.387373	0.970586	117.19	-0.264679	0.54622	17.279	-2.71359	0.0151296	-0.1259	0.7675	none	none	none	none	decreasing	none
ENSMUSG00000057789	Bak1	none	47.8914	0.162014	NA	13.5692	0.0434705	0.988602	20.0838	0.19922	0.991361	70.9492	0.237204	0.61397	51.7002	1.54429	0.015997	0.4123	0.02556	none	none	none	none	increasing	none
ENSMUSG00000024232	Bambi	none	17.4305	0.338921	NA	37.7765	0.330612	0.773501	7.94235	0.719289	0.915024	75.9666	-0.452497	0.199312	23.9033	3.25742	0.00175952	0.7897	0.008697	none	none	none	none	increasing	none
ENSMUSG00000024844	Banf1	none	152.782	0.254838	0.655752	126.896	-0.173782	0.817017	126.672	-0.302918	0.777081	154.919	-0.0916258	0.8112	88.8653	-0.0705953	0.956602	-0.07125	0.7136	none	none	none	none	none	none
ENSMUSG00000037922	Bank1	none	8.51688	0.764743	NA	8.72009	-0.192208	NA	NA	NA	NA	NA	NA	NA	39.564	-3.01812	5.35346e-06	-1.279	0.000577	none	none	none	none	decreasing	decreasing
ENSMUSG00000025316	Banp	none	114.323	0.709109	0.112073	95.6907	0.307353	0.741356	77.19	0.0999652	0.991399	62.3536	-0.969774	0.0023632	16.2067	-0.587564	0.750281	-0.1185	0.6207	none	none	none	none	none	none
ENSMUSG00000021901	Bap1	none	432.142	0.152325	0.706598	324.138	0.0726354	0.911952	218.996	-0.0626933	0.991776	216.461	0.0275418	0.947066	63.1176	-0.519992	0.537997	-0.2549	0.01716	none	none	none	none	none	none
ENSMUSG00000032033	Barx2	none	21.953	-0.047714	NA	NA	NA	NA	15.6353	0.00461854	0.997991	10.859	0.59786	0.517929	NA	NA	NA	-0.09284	0.8896	none	none	none	none	none	none
ENSMUSG00000045763	Basp1	none	1524.52	-0.156515	0.559226	971.205	-0.266652	0.473415	124.468	-0.0503314	0.994132	563.566	-0.560159	0.0195042	690.059	-0.320686	0.474575	-0.2602	0.05527	none	none	none	none	none	none
ENSMUSG00000026630	Batf3	none	5.20144	-0.208048	NA	4.544	2.87862	NA	NA	NA	NA	NA	NA	NA	12.3333	-0.873693	0.656542	2.747	7.314e-14	none	none	none	none	none	increasing
ENSMUSG00000003873	Bax	none	45.8873	0.548205	NA	36.4336	0.110732	0.9515	25.487	0.329656	0.953003	51.67	0.760528	0.0520817	34.5302	0.591243	0.620217	0.3377	0.01651	none	none	none	none	none	none
ENSMUSG00000035021	Baz1a	none	4.81246	-0.0608735	NA	NA	NA	NA	NA	NA	NA	3.90322	-0.815335	0.638551	56.9068	0.144216	0.922338	1.199	0.0002766	none	none	none	none	none	increasing
ENSMUSG00000002748	Baz1b	none	1030.69	-0.138426	0.665087	1027.46	-0.074453	0.893084	369.337	0.0728822	0.991361	206.694	-0.687425	0.00205537	186.429	-0.385094	0.492492	-0.1182	0.5273	none	none	none	none	none	none
ENSMUSG00000040054	Baz2a	none	304.068	0.0905779	0.863474	302.884	-0.0850705	0.899293	265.723	-0.166154	0.935078	167.559	-0.450429	0.0735614	70.709	-0.0103314	0.993629	-0.04804	0.7602	none	none	none	none	none	none
ENSMUSG00000026987	Baz2b	none	104.144	-0.55869	0.275521	82.5127	-0.0830679	0.948749	105.569	0.037993	0.994132	82.2427	0.0613391	0.904773	83.2621	-0.227193	0.819816	0.1559	0.3029	none	none	none	none	none	none
ENSMUSG00000085218	BB218582	none	4.76392	-1.47371	NA	8.45874	-0.520679	NA	NA	NA	NA	9.51894	-0.281326	0.820654	NA	NA	NA	NA	NA	none	none	none	none	none	none
ENSMUSG00000002083	Bbc3	none	15.4673	0.526526	NA	17.8174	0.582518	0.70226	6.68755	0.194128	0.994132	9.34661	0.89505	0.345252	9.00821	0.628869	0.824342	0.4945	0.2222	none	none	none	none	none	none
ENSMUSG00000084957	Bbip1	none	224.024	-0.215951	0.693543	185.362	-0.297749	0.529992	162.975	-0.34583	0.616875	473.709	-0.325996	0.2054	97.996	0.515627	0.445383	-0.1993	0.1949	none	none	none	none	none	none
ENSMUSG00000057265	Bbof1	none	10.8986	-0.0229047	NA	12.9782	0.121429	0.970437	7.0233	-0.129238	0.994132	9.20725	-0.282767	0.83213	NA	NA	NA	NA	NA	none	none	none	none	none	none
ENSMUSG00000006464	Bbs1	none	109.267	0.334577	0.61106	69.8815	0.0673543	0.967641	39.6768	0.495712	0.777081	58.1843	0.122958	0.825522	12.1188	-1.64859	0.254752	-0.1085	0.4121	none	none	none	none	none	none
ENSMUSG00000035759	Bbs10	none	39.0927	0.0213679	NA	45.3295	0.236029	0.861572	27.4361	0.0246666	0.995591	29.3137	-0.283003	0.642898	8.68469	0.107468	0.980441	0.1189	0.732	none	none	none	none	none	none
ENSMUSG00000051444	Bbs12	none	26.9403	-0.985997	NA	45.8101	0.338456	0.748092	16.8368	0.491593	0.932376	19.1555	-0.35907	0.626253	9.55472	0.375116	0.899039	-0.2002	0.5242	none	none	none	none	none	none
ENSMUSG00000031755	Bbs2	none	128.723	-0.111309	0.890466	132.199	0.00160165	0.998738	67.1466	-0.282864	0.916617	75.5724	-0.394852	0.265737	25.2896	0.156006	0.937084	0.02476	0.912	none	none	none	none	none	none
ENSMUSG00000025235	Bbs4	none	554.014	-0.185572	0.6035	599.566	-0.0324876	0.963908	431.171	0.164411	0.890745	316.369	-0.00153617	0.996304	43.3387	-0.460047	0.688924	-0.07402	0.669	none	none	none	none	none	none
ENSMUSG00000063145	Bbs5	none	149.553	-0.0429169	0.963377	185.108	0.113129	0.891674	64.1813	0.0681646	0.994132	41.7656	-0.281689	0.59238	13.6398	-0.947019	0.576332	0.04878	0.8367	none	none	none	none	none	none
ENSMUSG00000037325	Bbs7	none	147.754	-0.37556	0.473071	219.738	0.006772	0.993322	76.556	-0.106077	0.991361	50.8821	-0.236518	0.632959	26.2456	-0.0650146	0.979723	-0.02994	0.8967	none	none	none	none	none	none
ENSMUSG00000035919	Bbs9	none	102.052	-0.000163461	0.999806	63.9262	-0.329944	0.706325	30.0484	0.080454	0.994132	49.4773	0.17675	0.737974	69.9749	-0.844041	0.2038	-0.03597	0.8839	none	none	none	none	none	none
ENSMUSG00000022641	Bbx	none	190.66	-0.402243	0.334518	236.413	0.109624	0.884031	201.246	-0.0248373	0.994132	181.922	0.153379	0.641147	130.013	0.385106	0.58361	0.3107	0.02277	none	none	none	none	none	none
ENSMUSG00000060149	BC002059	none	46.1015	-0.781814	NA	94.15	0.181993	0.848676	36.8599	-0.315585	0.939405	43.7446	-0.935188	0.0125107	22.8653	0.564859	0.71388	NA	NA	none	none	none	none	none	none
ENSMUSG00000067722	BC003965	none	50.6317	-0.232697	NA	54.641	-0.275082	0.774499	32.4121	0.00234123	0.998152	66.7856	-0.289036	0.465989	19.2773	-0.61153	0.709442	-0.209	0.2382	none	none	none	none	none	none
ENSMUSG00000052712	BC004004	none	532.321	0.00718568	0.992245	465.228	-0.188121	0.571425	585.509	-0.17985	0.867516	626.45	-0.0639178	0.839947	266.231	0.351496	0.493471	0.07273	0.6489	none	none	none	none	none	none
ENSMUSG00000019132	BC005537	none	155.728	-0.00470022	0.997747	117.339	0.28022	0.627287	98.0442	0.191434	0.9512	154.861	0.304519	0.282886	79.4462	0.312706	0.751467	-0.138	0.2834	none	none	none	none	none	none
ENSMUSG00000079065	BC005561	none	92.4189	-0.381728	NA	146.041	0.169673	0.832043	90.0875	-0.116192	0.991361	46.2213	-0.220426	0.681782	28.1301	0.370494	0.829396	0.306	0.5456	none	none	none	none	none	none
ENSMUSG00000026851	BC005624	none	242.013	0.228631	0.637436	182.631	-0.0109035	0.991677	139.702	0.0856342	0.991361	123.192	-0.055524	0.902087	73.6107	0.0340588	0.984467	-0.2095	0.1069	none	none	none	none	none	none
ENSMUSG00000041674	BC006965	none	4.59847	-0.0822814	NA	NA	NA	NA	NA	NA	NA	10.3415	-0.902741	0.290985	NA	NA	NA	0.05757	0.927	none	none	none	none	none	none
ENSMUSG00000030780	BC017158	none	76.1232	0.230323	NA	66.6014	-0.0398568	0.978534	63.8806	0.0798208	0.994132	78.6914	-0.125222	0.787075	27.9973	0.703857	0.612235	0.1719	0.2879	none	none	none	none	none	none
ENSMUSG00000081137	BC022960	none	6.58179	0.164299	NA	6.71639	0.237184	NA	7.94856	-0.156469	0.994132	NA	NA	NA	NA	NA	NA	NA	NA	none	none	none	none	none	none
ENSMUSG00000112160	BC024063	none	9.18693	-0.337444	NA	16.5881	0.113875	0.970437	9.13831	0.212035	0.993949	6.88126	-0.525107	0.671747	5.10955	0.593888	0.89004	NA	NA	none	none	none	none	none	none
ENSMUSG00000078786	BC024978	none	28.9326	0.361877	NA	21.6141	0.355473	0.848676	39.0905	0.276269	0.957654	42.522	-0.106767	0.870016	24.4881	-0.222667	0.909126	-0.08406	0.7799	none	none	none	none	none	none
ENSMUSG00000074862	BC025920	none	11.1706	-0.723424	NA	8.94626	0.126487	NA	3.94485	0.366249	0.991399	5.55005	-0.736889	0.583651	NA	NA	NA	-0.1085	0.7855	none	none	none	none	none	none
ENSMUSG00000038543	BC028528	none	NA	NA	NA	NA	NA	NA	NA	NA	NA	NA	NA	NA	133.606	0.841109	0.0856729	1.017	0.004843	none	none	none	none	none	increasing
ENSMUSG00000074649	BC029722	none	29.8574	0.0919332	NA	22.5976	0.267824	0.891674	25.2726	0.84889	0.518174	34.7487	0.319151	0.591829	8.80877	0.0661337	0.987513	-0.0009851	0.997	none	none	none	none	none	none
ENSMUSG00000049946	BC030500	none	10.2861	-0.286868	NA	17.5377	0.151993	0.957029	14.0384	0.212016	0.991361	NA	NA	NA	NA	NA	NA	-0.481	0.04175	none	none	none	none	none	none
ENSMUSG00000036299	BC031181	none	250.066	-0.253344	0.633058	452.124	-0.0133311	0.987768	526.939	-0.257361	0.719513	679.135	0.193887	0.48778	139.725	0.480867	0.414568	-0.03838	0.8202	none	none	none	none	none	none
ENSMUSG00000033722	BC034090	none	9.37228	-0.34526	NA	NA	NA	NA	8.76812	0.803966	0.885503	24.8743	-0.784335	0.186622	NA	NA	NA	NA	NA	none	none	none	none	none	none
ENSMUSG00000053684	BC048403	none	44.6063	-0.384784	NA	46.6638	-0.126488	0.935111	30.562	0.0826018	0.994132	24.7804	0.799133	0.138478	16.1112	0.107023	0.972524	0.0267	0.9293	none	none	none	none	none	none
ENSMUSG00000091996	BC049352	none	NA	NA	NA	NA	NA	NA	NA	NA	NA	NA	NA	NA	NA	NA	NA	NA	NA	none	none	none	none	none	none
ENSMUSG00000047515	BC049715	none	4.42336	-0.0871719	NA	4.57738	-1.38263	NA	NA	NA	NA	4.36731	1.10886	0.447325	NA	NA	NA	-0.1283	0.8724	none	none	none	none	none	none
ENSMUSG00000092564	BC051226	none	16.0792	-0.0885194	NA	11.2971	-0.436064	NA	7.52541	-0.0537906	0.995591	14.9555	-0.212143	0.824696	NA	NA	NA	-0.1442	0.7678	none	none	none	none	none	none
ENSMUSG00000040282	BC052040	none	45.645	-0.268523	NA	39.2534	-0.219776	0.876583	42.8313	-0.00369031	0.997356	30.4053	-0.106874	0.886616	6.02286	-0.248191	0.954723	-0.2606	0.3671	none	none	none	none	none	none
ENSMUSG00000041406	BC055324	none	9.33309	0.308372	NA	6.95421	0.721	NA	20.9795	-0.240872	0.980439	13.064	0.169782	0.876874	7.68819	-0.133199	0.979477	0.5856	0.2637	none	none	none	none	none	none
ENSMUSG00000021763	BC067074	none	6.69854	0.274157	NA	NA	NA	NA	4.89124	1.21958	0.84432	198.507	1.98911	7.90602e-22	3.95025	-0.645434	0.892038	NA	NA	none	none	none	increasing	none	none
ENSMUSG00000115783	Bc1	none	322.351	-1.16261	0.554967	80.6696	-0.176863	0.970437	279.239	0.0319737	0.997183	454.869	-0.228985	0.887527	347.941	-0.853872	0.0642936	NA	NA	none	none	none	none	none	none
ENSMUSG00000002980	Bcam	none	15.613	0.182304	NA	NA	NA	NA	10.7842	0.489994	0.957473	94.9203	0.441544	0.19452	5.41799	0.169572	0.978072	0.05656	0.8334	none	none	none	none	none	none
ENSMUSG00000004892	Bcan	none	175.011	0.290633	0.589367	155.688	-0.0320868	0.978903	339.663	-0.0905018	0.979472	9987.57	-1.04935	3.57254e-10	75.4114	-1.65767	0.00492101	-0.1342	0.4119	none	none	none	decreasing	decreasing+neuronal	none
ENSMUSG00000020650	Bcap29	none	365.527	-0.435262	0.163285	451.016	-0.21474	0.481264	351.701	-0.351044	0.568861	837.061	-0.0563897	0.868519	247.524	0.405914	0.451737	0.1305	0.4187	none	none	none	none	none	none
ENSMUSG00000002015	Bcap31	none	448.147	-0.268814	0.415448	433.766	-0.264722	0.327549	626.878	-0.417875	0.200588	886.755	-0.049001	0.866996	518.209	0.29896	0.519663	-0.2174	0.1342	none	none	none	none	none	none
ENSMUSG00000031955	Bcar1	none	232.643	0.340755	0.45021	184.62	0.134351	0.867468	437.412	-0.28905	0.587682	121.373	0.638437	0.0171131	8.34879	-1.65064	0.383842	0.3593	0.009749	none	none	none	none	none	none
ENSMUSG00000028121	Bcar3	none	50.0219	0.268133	NA	5.71821	0.101919	NA	18.1712	0.397741	0.957654	168.78	-1.26123	1.08045e-08	43.7092	2.76469	6.13207e-05	0.3444	0.04728	none	none	none	decreasing	increasing	none
ENSMUSG00000013523	Bcas1	none	60.2286	0.227777	NA	5.59562	1.28803	NA	23.2974	0.834728	0.957654	345.401	3.69444	2.61078e-74	13.9943	0.463421	0.864506	0.5212	6.585e-05	none	none	none	increasing	none	none
ENSMUSG00000005687	Bcas2	none	441.732	-0.144079	0.720264	481.413	-0.146737	0.806948	551.976	-0.235956	0.789629	566.808	0.0648927	0.837396	225.945	0.195293	0.78817	-0.001974	0.9928	none	none	none	none	none	none
ENSMUSG00000059439	Bcas3	none	584.179	0.271244	0.369642	582.191	0.015898	0.980844	265.123	0.0717275	0.991361	259.824	0.338391	0.158678	80.6139	-0.456777	0.583694	-0.1625	0.1872	none	none	none	none	none	none
ENSMUSG00000030268	Bcat1	none	475.663	0.079529	0.860665	491.752	-0.234278	0.411427	872.401	0.0952044	0.977729	114.784	0.113025	0.77976	32.6028	-1.97857	0.0125496	-0.2939	0.003211	none	none	none	none	decreasing+neuronal	none
ENSMUSG00000030826	Bcat2	none	34.8824	0.0887661	NA	23.7072	-1.14606	0.105287	8.29065	-0.0640931	0.994132	32.9959	-0.535088	0.297433	28.3277	0.143968	0.939203	0.07523	0.78	none	none	none	none	none	none
ENSMUSG00000030983	Bccip	none	213.615	-0.0353245	0.964403	235.492	-0.0455915	0.959134	90.1379	0.0845208	0.991887	155.107	0.156719	0.644893	65.6332	0.284522	0.797552	-0.1813	0.2746	none	none	none	none	none	none
ENSMUSG00000037525	Bcdin3d	none	12.3469	-0.440698	NA	8.38296	0.564672	NA	13.3046	-0.151566	0.994132	11.647	-0.454603	0.665175	6.39019	0.611642	0.854992	0.1991	0.6418	none	none	none	none	none	none
ENSMUSG00000027792	Bche	none	9.4203	-0.25794	NA	NA	NA	NA	4.73518	-0.294467	0.992897	33.8208	-1.07871	0.0188185	NA	NA	NA	-0.5618	0.05497	none	none	none	decreasing	none	none
ENSMUSG00000060376	Bckdha	none	119.942	0.407726	0.476771	112.633	-0.138741	0.87963	74.124	0.041026	0.994132	200.41	0.1612	0.591648	65.591	0.20567	0.869423	0.3857	0.031	none	none	none	none	none	none
ENSMUSG00000032263	Bckdhb	none	122.362	0.0156379	0.98968	166.845	-0.312798	0.481187	164.728	-0.110511	0.977956	62.6789	-0.831132	0.0116681	16.3005	-0.473167	0.821313	-0.2787	0.07104	none	none	none	none	none	none
ENSMUSG00000030802	Bckdk	none	224.816	0.22494	0.64442	200.404	0.0148039	0.987768	116.415	0.448116	0.470351	150.817	0.23434	0.445323	77.3178	-0.175088	0.877651	0.06947	0.7015	none	none	none	none	none	none
ENSMUSG00000028191	Bcl10	none	51.0311	-0.101868	NA	51.1916	0.0529365	0.976385	33.6945	0.232383	0.973539	121.815	0.338438	0.276644	121.504	1.0916	0.0174068	0.3404	0.06313	none	none	none	none	increasing	none
ENSMUSG00000000861	Bcl11a	none	887.141	0.117885	0.729758	1034.07	-0.300676	0.10106	153.133	-0.194434	0.922347	166.596	-0.278331	0.390143	15.0429	-0.800426	0.655833	-0.4354	0.0001042	none	none	none	none	none	none
ENSMUSG00000048251	Bcl11b	none	393.034	-0.174612	0.694238	772.24	0.227445	0.362984	42.5715	0.185992	0.979024	92.3429	-0.327708	0.347192	17.424	-1.88638	0.115238	-0.3205	0.05822	none	none	none	none	none	none
ENSMUSG00000057329	Bcl2	none	38.2363	-0.485135	NA	10.2446	-0.213428	NA	17.0635	-0.156063	0.993949	183.757	0.18916	0.530239	16.9166	1.99377	0.102724	0.9703	1.209e-14	none	none	none	none	none	none
ENSMUSG00000007659	Bcl2l1	none	265.796	0.406814	0.252145	163.631	-0.0333367	0.9775	202.944	0.0790641	0.991361	178.35	0.513877	0.025918	134.378	1.20918	0.0126842	0.1108	0.3773	none	none	none	none	increasing	none
ENSMUSG00000027381	Bcl2l11	none	7.86523	0.00243397	NA	4.09919	0.946343	NA	17.5284	0.795871	0.723123	10.2227	0.0894605	0.949138	55.4561	1.19727	0.0693147	0.4495	0.02818	none	none	none	none	none	none
ENSMUSG00000009112	Bcl2l13	none	162.765	0.0817033	0.91819	123.918	0.221412	0.724255	74.3039	0.214319	0.956332	111.952	-0.0275708	0.956353	26.7745	0.655729	0.645675	-0.08515	0.5496	none	none	none	none	none	none
ENSMUSG00000089682	Bcl2l2	none	10.7532	1.0939	NA	3.97438	-1.79521	NA	9.06534	-0.22412	0.992723	9.08487	-0.371381	0.742413	NA	NA	NA	-0.2403	0.05512	none	none	none	none	none	none
ENSMUSG00000022508	Bcl6	none	214.879	0.289845	0.511689	636.496	-0.0538358	0.935363	303.815	0.440438	0.200693	175.416	0.354808	0.170207	83.917	0.563157	0.425076	-0.08795	0.6882	none	none	none	none	none	none
ENSMUSG00000000317	Bcl6b	none	NA	NA	NA	NA	NA	NA	NA	NA	NA	NA	NA	NA	NA	NA	NA	-0.8843	0.007233	none	none	none	none	none	none
ENSMUSG00000029438	Bcl7a	none	457.843	0.176316	0.641739	487.585	-0.0514402	0.935111	244.188	-0.281048	0.674033	162.548	-0.339273	0.218404	25.4587	-0.198883	0.918751	-0.1142	0.3427	none	none	none	none	none	none
ENSMUSG00000029681	Bcl7b	none	195.9	0.065786	0.934093	160.057	-0.122069	0.879285	175.292	-0.0524581	0.994132	132.036	-0.0534866	0.902283	71.0769	0.302122	0.763666	-0.0285	0.8831	none	none	none	none	none	none
ENSMUSG00000030814	Bcl7c	none	17.3243	0.64205	NA	8.93216	-0.623622	NA	9.58778	-0.263952	0.991361	30.473	0.722748	0.146329	10.3253	-0.527912	0.832257	0.3483	0.2852	none	none	none	none	none	none
ENSMUSG00000038256	Bcl9	none	192.876	-0.109509	0.862036	200.261	-0.277484	0.515852	112.619	-0.125854	0.977956	126.098	-0.251998	0.417458	46.7311	-0.607398	0.535282	-0.2089	0.1403	none	none	none	none	none	none
ENSMUSG00000063382	Bcl9l	none	121.741	0.0999206	0.906634	105.429	0.19588	0.802326	70.0478	-0.164147	0.979472	92.259	-0.868589	0.00300836	65.8848	-0.659494	0.369914	0.04737	0.8469	none	none	none	none	none	none
ENSMUSG00000037608	Bclaf1	none	1171.03	-0.456073	0.0225672	1285.19	0.0275683	0.970437	693.277	-0.0960657	0.960092	372.309	-0.117361	0.760692	185.281	0.138344	0.869423	-0.01362	0.9415	none	none	none	none	none	none
ENSMUSG00000044150	Bclaf3	none	94.4984	-0.463789	NA	87.8913	0.106467	0.933942	48.7626	-0.291773	0.939405	44.5882	-0.501213	0.257246	21.747	0.690664	0.654637	NA	NA	none	none	none	none	none	none
ENSMUSG00000040363	Bcor	none	251.711	0.234943	0.639974	156.983	0.461463	0.153034	55.02	-0.192502	0.968272	72.8748	-0.614457	0.0514988	105.234	-0.0226318	0.987552	-0.3429	0.01412	none	none	none	none	none	none
ENSMUSG00000036959	Bcorl1	none	193.267	-0.152251	0.796518	159.457	-0.264147	0.666011	95.4736	-0.530898	0.387342	116.72	-0.901597	0.000221714	12.7614	-0.765494	0.702661	-0.3486	0.01217	none	none	none	none	none	none
ENSMUSG00000009681	Bcr	none	639.088	0.126613	0.776429	823.981	0.269473	0.220505	135.491	0.151551	0.964767	310.953	0.224417	0.496979	44.9121	-1.84667	0.00733589	-0.2161	0.09163	none	none	none	none	decreasing+neuronal	none
ENSMUSG00000026172	Bcs1l	none	102.743	-0.170499	0.82777	101.553	-0.236928	0.725925	39.7793	-0.0584808	0.994132	45.8117	0.129149	0.831959	16.1246	-0.657993	0.71202	-0.1582	0.3855	none	none	none	none	none	none
ENSMUSG00000046598	Bdh1	none	384.4	0.48428	0.0678299	313.645	0.0174823	0.982131	164.049	-0.0207591	0.994132	275.115	0.0102684	0.980674	10.3052	-0.918934	0.670716	0.1611	0.2201	none	none	none	none	none	none
ENSMUSG00000048482	Bdnf	none	413.334	-0.189707	0.631734	595.219	0.435623	0.0545381	51.8698	-0.485324	0.703411	176.293	0.271687	0.337353	NA	NA	NA	0.106	0.5615	none	none	none	none	none	none
ENSMUSG00000049658	Bdp1	none	145.28	-0.340232	0.520515	144.232	0.265037	0.637214	95.2183	-0.216494	0.938729	95.9655	-0.656839	0.0198477	71.4017	-0.268615	0.795951	-0.07298	0.746	none	none	none	none	none	none
ENSMUSG00000031872	Bean1	none	16.5669	-0.200359	NA	8.04205	-0.694425	NA	18.945	-0.485436	0.913292	5.63857	-0.519385	0.718652	NA	NA	NA	-0.7029	0.005799	none	none	none	none	none	none
ENSMUSG00000035086	Becn1	none	315.476	0.00949331	0.99082	301.559	-0.0152327	0.984076	126.246	0.194258	0.939405	155.478	0.426959	0.105959	103.606	0.0225956	0.987513	-0.06309	0.6367	none	none	none	none	none	none
ENSMUSG00000040867	Begain	none	142.399	0.188973	0.769718	113.357	-0.252207	0.696161	32.6666	-0.1493	0.991399	53.5931	0.129929	0.838383	11.4606	-3.03408	0.0384999	-0.2434	0.1276	none	none	none	none	decreasing+neuronal	none
ENSMUSG00000038214	Bend3	none	23.5084	-0.860107	NA	14.4276	0.139149	0.965216	5.07497	0.539665	0.977337	9.89269	1.20844	0.162237	6.70195	-0.0889179	0.986524	-0.04314	0.8824	none	none	none	none	none	none
ENSMUSG00000092060	Bend4	none	13.1444	-0.242414	NA	15.875	0.281345	0.908058	10.769	0.529502	0.948922	8.19043	0.554833	0.613593	NA	NA	NA	-0.5313	0.001006	none	none	none	none	none	none
ENSMUSG00000028545	Bend5	none	78.0378	-0.261734	NA	55.3671	0.139561	0.917849	10.6969	0.299009	0.988368	22.4086	0.133181	0.878365	6.60762	0.0653623	0.989274	-0.0338	0.9421	none	none	none	none	none	none
ENSMUSG00000042182	Bend6	none	208.56	-0.39025	0.364952	120.966	-0.918257	0.00144791	390.928	-0.526564	0.142687	113.889	-0.0626492	0.901733	58.2758	-0.79571	0.282619	-0.559	3.518e-06	none	none	none	none	none	none
ENSMUSG00000048186	Bend7	none	10.607	0.257307	NA	NA	NA	NA	6.18668	0.545686	0.9661	9.82433	0.551764	0.589214	NA	NA	NA	0.3613	0.3252	none	none	none	none	none	none
ENSMUSG00000037418	Best1	none	6.76682	-1.50407	NA	6.82649	-0.150151	NA	NA	NA	NA	4.58833	0.0366673	0.985452	NA	NA	NA	0.03901	0.949	none	none	none	none	none	none
ENSMUSG00000032757	Bet1	none	84.0855	-0.329865	NA	118.564	0.2099	0.761307	113.436	-0.0915368	0.991399	390.244	0.180535	0.495773	89.4517	0.155959	0.886608	0.2889	0.09392	none	none	none	none	none	none
ENSMUSG00000025484	Bet1l	none	11.1315	0.842878	NA	5.60565	1.06241	NA	8.19317	0.67989	0.923706	5.23982	0.23911	0.891141	NA	NA	NA	-0.05324	0.7891	none	none	none	none	none	none
ENSMUSG00000050071	Bex1	none	167.996	-0.135051	0.841914	135.12	-0.0617687	0.953744	122.36	-0.0981724	0.988481	71.6854	-0.187373	0.702309	NA	NA	NA	-0.4248	0.009508	none	none	none	none	none	none
ENSMUSG00000042750	Bex2	none	1072.21	0.185726	0.524088	1133.73	0.116793	0.744662	664.268	-0.23956	0.703411	378.409	0.0655102	0.861577	29.8493	0.211472	0.90511	-0.1873	0.1284	none	none	none	none	none	none
ENSMUSG00000046432	Bex3	none	745.382	0.104491	0.790385	620.079	0.049984	0.935363	500.767	-0.149006	0.932376	409.97	0.206392	0.425175	60.7224	0.266933	0.818128	NA	NA	none	none	none	none	none	none
ENSMUSG00000047844	Bex4	none	28.942	0.606011	NA	22.9737	-0.530651	0.6985	17.606	-0.376791	0.957654	18.2743	-0.41045	0.591829	NA	NA	NA	-0.5895	0.008049	none	none	none	none	none	none
ENSMUSG00000022684	Bfar	none	132.794	-0.21455	0.740731	120.833	-0.139897	0.868509	169.269	-0.17264	0.943961	173.918	-0.426297	0.095523	52.4118	0.1579	0.909979	-0.1129	0.516	none	none	none	none	none	none
ENSMUSG00000031375	Bgn	none	22.5844	0.231723	NA	4.01619	0.982679	NA	7.32387	0.584615	0.957654	144.201	0.216967	0.583582	7.48042	-1.13856	0.631514	0.662	6.178e-06	none	none	none	none	none	none
ENSMUSG00000044243	Bhlha9	none	4.66647	-0.240354	NA	4.63886	-0.276051	NA	NA	NA	NA	NA	NA	NA	NA	NA	NA	-0.2759	0.5982	none	none	none	none	none	none
ENSMUSG00000072964	Bhlhb9	none	597.129	-0.421044	0.076531	755.592	0.0991573	0.81214	258.247	0.12755	0.958839	287.821	-0.227855	0.359902	48.584	-0.261464	0.835189	-0.2475	0.04602	none	none	none	none	none	none
ENSMUSG00000025128	Bhlhe22	none	84.9706	0.298611	NA	117.794	-0.253567	0.730525	80.3573	0.433692	0.616875	31.6155	0.0308329	0.97452	4.90461	-2.89973	0.252287	-0.5168	0.003319	none	none	none	none	none	none
ENSMUSG00000030103	Bhlhe40	none	900.198	0.613125	0.00335738	938.735	0.346315	0.0376299	244.074	0.516758	0.218908	439.451	0.086955	0.787075	116.704	3.2793	7.86727e-12	-0.08458	0.6737	none	none	none	none	increasing	none
ENSMUSG00000030256	Bhlhe41	none	150.016	0.431975	0.420018	241.23	0.397668	0.280544	170.979	0.149723	0.957654	386.704	0.519519	0.0106435	387.354	1.13841	0.000689646	0.976	8.553e-11	none	none	none	none	increasing	none
ENSMUSG00000014329	Bicc1	none	7.4175	-0.148538	NA	NA	NA	NA	4.84744	-0.44113	0.988481	25.0172	1.27357	0.00774397	3.02745	-2.60148	0.467455	0.7844	0.001124	none	none	none	increasing	none	none
ENSMUSG00000003452	Bicd1	none	324.601	-0.272862	0.474038	317.549	0.154657	0.746566	292.394	0.0224263	0.994132	233.462	0.124785	0.714531	21.7163	-2.08712	0.0389156	0.08741	0.7885	none	none	none	none	decreasing+neuronal	none
ENSMUSG00000037933	Bicd2	none	227.149	-0.00908168	0.992585	208.046	0.251257	0.552715	143.617	0.120447	0.977956	189.506	0.377874	0.142623	163.604	0.224652	0.797072	-0.1269	0.2707	none	none	none	none	none	none
ENSMUSG00000041609	Bicdl1	none	49.1958	0.74374	NA	26.935	-0.0311728	0.988602	30.8655	-0.26232	0.962425	37.3334	0.456969	0.339464	11.0623	-0.940067	0.645675	NA	NA	none	none	none	none	none	none
ENSMUSG00000070808	Bicra	none	76.3583	0.167623	NA	55.4104	0.14947	0.912561	69.3129	-0.354118	0.802139	102.19	0.132491	0.750905	55.4973	-0.412679	0.695995	NA	NA	none	none	none	none	none	none
ENSMUSG00000036568	Bicral	none	206.071	0.128702	0.831415	157.977	0.194294	0.748713	131.841	0.0882812	0.991361	113.406	-0.25226	0.477826	65.2024	-0.404736	0.67157	NA	NA	none	none	none	none	none	none
ENSMUSG00000004446	Bid	none	69.0761	0.148143	NA	89.8731	0.255936	0.723763	47.9476	0.373773	0.852284	32.4569	0.892938	0.0539399	65.9478	-0.481708	0.568128	0.1597	0.4491	none	none	none	none	none	none
ENSMUSG00000024381	Bin1	none	1144.29	0.117293	0.702256	1112.41	0.0529489	0.915692	570.913	0.0656428	0.991361	312.386	0.232016	0.377454	1016.12	-0.774252	0.0101727	-0.04269	0.8217	none	none	none	none	none	none
ENSMUSG00000098112	Bin2	none	8.68212	0.838664	NA	NA	NA	NA	NA	NA	NA	NA	NA	NA	698.771	-1.14837	0.000196593	NA	NA	none	none	none	none	decreasing	none
ENSMUSG00000022089	Bin3	none	42.4463	0.278638	NA	37.3109	-0.0901514	0.962436	20.8703	-0.0932304	0.994132	34.6325	1.27124	0.00299965	77.5424	0.987229	0.0894462	0.471	0.005691	none	none	none	increasing	none	none
ENSMUSG00000057367	Birc2	none	220.068	-0.168826	0.762387	192.379	0.176747	0.759062	168.151	0.182607	0.939405	111.823	0.194017	0.59238	43.1409	0.623288	0.579469	0.0401	0.8394	none	none	none	none	none	none
ENSMUSG00000032000	Birc3	none	NA	NA	NA	NA	NA	NA	NA	NA	NA	11.0176	1.16765	0.16389	38.4097	1.21253	0.147029	1.384	5.496e-09	none	none	none	none	none	increasing
ENSMUSG00000024073	Birc6	none	1908.42	0.0901569	0.826604	2099.9	0.283737	0.190236	1687.57	-0.0172219	0.994132	1054.19	-0.265392	0.190285	419.49	-0.463122	0.255288	-0.1362	0.3739	none	none	none	none	none	none
ENSMUSG00000041684	Bivm	none	171.53	-0.297438	0.561263	219.187	0.192317	0.750521	216.574	0.0325139	0.994132	137.574	-0.00300572	0.994725	36.5828	-0.0737904	0.97384	0.05298	0.7892	none	none	none	none	none	none
ENSMUSG00000067787	Blcap	none	130.325	-0.129942	0.859005	212.598	-0.274429	0.509147	134.289	0.182436	0.943961	124.046	-0.210343	0.57081	15.3771	0.212103	0.930512	-0.1693	0.1655	none	none	none	none	none	none
ENSMUSG00000030528	Blm	none	43.274	-0.143054	NA	34.5045	0.297802	0.827037	56.4019	0.331741	0.896286	13.5697	0.301035	0.754887	17.3239	0.533144	0.800895	0.1876	0.6144	none	none	none	none	none	none
ENSMUSG00000020840	Blmh	none	433.574	0.0378748	0.951524	384.955	0.0320965	0.96924	315.329	0.221716	0.811349	150.81	-0.440862	0.101264	113.275	-0.342286	0.640702	0.03461	0.8714	none	none	none	none	none	none
ENSMUSG00000061132	Blnk	none	66.3729	-0.167117	NA	47.0941	1.84541	1.31101e-05	2.34881	2.75588	0.681019	8.46373	0.441404	0.712707	396.97	0.723499	0.0269794	1.742	1.232e-17	none	increasing	none	none	none	increasing
ENSMUSG00000090247	Bloc1s1	none	15.0018	0.288498	NA	7.0873	-0.625721	NA	14.0038	0.49576	0.939405	69.1189	0.281478	0.532814	28.1227	-0.351461	0.827303	0.3549	0.008414	none	none	none	none	none	none
ENSMUSG00000057506	Bloc1s2	none	4.17079	2.12491	NA	NA	NA	NA	NA	NA	NA	NA	NA	NA	NA	NA	NA	-0.02589	0.928	none	none	none	none	none	none
ENSMUSG00000057667	Bloc1s3	none	27.9892	0.346144	NA	9.77134	-0.143748	NA	15.1318	-0.0773078	0.994132	16.1042	0.0439506	0.970731	7.117	2.03722	0.388105	0.09665	0.7481	none	none	none	none	none	none
ENSMUSG00000060708	Bloc1s4	none	28.4089	0.0170911	NA	25.6358	-0.275452	0.89194	18.3882	0.258027	0.983133	29.2441	0.32083	0.594854	12.6697	0.623108	0.786416	NA	NA	none	none	none	none	none	none
ENSMUSG00000038982	Bloc1s5	none	40.9394	0.0411818	NA	39.9441	0.234225	0.862086	66.3882	0.109957	0.991361	111.146	-0.128074	0.763101	37.1819	0.33686	0.813772	NA	NA	none	none	none	none	none	none
ENSMUSG00000005804	Bloc1s6	none	158.131	-0.0659496	0.937782	144.191	0.0678937	0.948749	80.2013	0.450722	0.565328	175.682	0.316991	0.244294	47.7376	1.08784	0.139467	NA	NA	none	none	none	none	none	none
ENSMUSG00000001999	Blvra	none	160.386	-0.295603	0.566878	120.879	0.208954	0.80137	147.3	0.0188233	0.994789	60.3353	-0.0604782	0.917103	108.031	0.552459	0.36773	0.2582	0.1903	none	none	none	none	none	none
ENSMUSG00000040466	Blvrb	none	58.6929	0.250718	NA	32.8271	0.0585277	0.980844	40.5259	0.202084	0.977337	81.6958	0.338483	0.356301	120.352	0.515878	0.446069	0.7251	0.01025	none	none	none	none	none	none
ENSMUSG00000026577	Blzf1	none	131.966	-0.372175	0.496927	156.551	-0.00336116	0.997252	168.764	-0.195515	0.916617	131.898	-0.885734	0.000240647	32.0718	-0.470602	0.715397	0.05165	0.8064	none	none	none	none	none	none
ENSMUSG00000044117	Bmerb1	none	1035.19	0.130605	0.682437	764.215	0.0261016	0.96924	481.345	0.0250683	0.994132	546.872	0.878313	2.47084e-07	28.4199	-0.603346	0.654435	NA	NA	none	none	none	none	none	none
ENSMUSG00000026739	Bmi1	none	87.3032	-0.0732329	NA	129.274	0.128964	0.881738	46.5108	-0.416717	0.852284	116.217	-0.160279	0.67375	70.7151	0.589259	0.488317	-0.01374	0.9495	none	none	none	none	none	none
ENSMUSG00000022098	Bmp1	none	104.055	0.0195299	0.987089	76.9586	-0.107493	0.935363	44.0332	-0.383326	0.902369	487.075	0.511696	0.0283468	28.385	-0.0794333	0.97374	0.3961	0.0003855	none	none	none	none	none	none
ENSMUSG00000027358	Bmp2	none	20.0189	-0.195991	NA	14.1045	0.123502	0.968456	14.7381	-0.330152	0.977729	13.2379	-0.178873	0.890487	NA	NA	NA	-0.003373	0.9958	none	none	none	none	none	none
ENSMUSG00000034663	Bmp2k	none	22.0985	0.125964	NA	17.9814	0.585452	0.687955	34.7283	0.378747	0.908037	163.645	0.53638	0.0247425	523.693	0.283514	0.539944	1.164	3.461e-22	none	none	none	none	none	increasing
ENSMUSG00000029335	Bmp3	none	445.142	-0.218972	0.556079	101.298	1.03941	0.0103766	5.74153	0.435911	0.980439	252.01	-0.274073	0.435107	9.70074	-1.10685	0.597432	0.1205	0.8294	none	increasing	none	none	none	none
ENSMUSG00000039004	Bmp6	none	8.56548	0.333739	NA	NA	NA	NA	4.33887	-0.535423	0.979472	48.5466	0.262383	0.602959	4.09126	-1.33959	0.700393	0.9636	0.0001629	none	none	none	none	none	none
ENSMUSG00000008999	Bmp7	none	8.25419	-0.615355	NA	2.70581	-0.403599	NA	5.13836	-0.33341	0.991361	61.8503	0.36154	0.41172	NA	NA	NA	0.6542	0.03168	none	none	none	none	none	none
ENSMUSG00000031963	Bmper	none	81.3144	-0.281377	NA	45.0437	-0.599497	0.601666	43.7171	-0.567847	0.665718	91.7761	-0.259115	0.507576	NA	NA	NA	-0.1771	0.5993	none	none	none	none	none	none
ENSMUSG00000021796	Bmpr1a	none	160.666	-0.0975668	0.897505	202.583	-0.0698394	0.935363	143.278	-0.161814	0.957669	1424.97	-0.271134	0.250275	119.282	0.391799	0.601525	0.1406	0.316	none	none	none	none	none	none
ENSMUSG00000052430	Bmpr1b	none	39.6368	0.955004	NA	8.27948	0.401945	NA	10.6925	0.301794	0.983338	976.337	0.034502	0.928462	13.3176	-1.52042	0.452718	0.7068	3.777e-08	none	none	none	none	none	none
ENSMUSG00000067336	Bmpr2	none	1400.45	-0.349621	0.104034	1601.01	0.00432372	0.993322	1159.1	-0.230956	0.846278	2285.01	-0.211123	0.298107	532.824	0.00834496	0.991725	0.3298	0.4693	none	none	none	none	none	none
ENSMUSG00000030138	Bms1	none	189.92	-0.2312	0.666747	149.922	0.139868	0.854032	101.069	0.129393	0.979195	63.5535	-0.486524	0.187366	70.9158	0.119252	0.924502	0.03508	0.8574	none	none	none	none	none	none
ENSMUSG00000042742	Bmt2	none	164.058	-0.250803	0.671605	186.4	-0.107743	0.895183	90.5864	-0.129773	0.985685	124.34	-0.235727	0.472558	68.1293	1.33155	0.0200395	NA	NA	none	none	none	none	increasing	none
ENSMUSG00000049086	Bmyc	none	229.367	0.216013	0.671746	175.124	-0.172949	0.772175	109.535	-0.0095128	0.997183	144.961	-0.509973	0.0459565	92.6413	-0.0179518	0.990867	-0.008132	0.9857	none	none	none	none	none	none
ENSMUSG00000024191	Bnip1	none	174.407	-0.0273179	0.975872	223.098	-0.0450716	0.962013	123.647	-0.194386	0.941917	98.1177	-0.15086	0.715768	46.2738	0.118956	0.942095	-0.1382	0.4873	none	none	none	none	none	none
ENSMUSG00000011958	Bnip2	none	52.1008	0.0582448	NA	61.8144	0.281872	0.763718	44.3281	0.132353	0.991361	163.709	0.552003	0.0312051	192.88	0.299446	0.62764	0.4801	0.0005704	none	none	none	none	none	none
ENSMUSG00000078566	Bnip3	none	366.008	-0.118452	0.812743	319.931	-0.222828	0.609951	323.079	-0.130873	0.957654	180.551	-0.256737	0.430077	50.1826	0.686021	0.429966	-0.2753	0.02396	none	none	none	none	none	none
ENSMUSG00000022051	Bnip3l	none	185.646	0.236506	0.678077	135.178	-0.167614	0.827596	93.6014	-0.29097	0.869839	207.333	0.342853	0.169689	89.4922	0.412257	0.598408	0.01237	0.9394	none	none	none	none	none	none
ENSMUSG00000022687	Boc	none	246.415	0.064957	0.929718	99.9827	-0.0309	0.980844	262.33	-0.636333	0.0271116	550.95	-0.116624	0.68229	12.5087	-1.43865	0.36419	0.5676	3.061e-06	none	none	none	none	none	none
ENSMUSG00000044502	Bod1	none	146.518	0.1661	0.825438	107.23	0.0992249	0.927249	96.2865	-0.0630711	0.994132	144.866	0.135499	0.723517	15.1979	-0.379037	0.865327	-0.207	0.09446	none	none	none	none	none	none
ENSMUSG00000061755	Bod1l	none	711.558	-0.259083	0.375883	745.157	0.0156233	0.984651	979.958	-0.377339	0.239051	684.994	-0.485165	0.0165763	413.836	-0.432677	0.287766	-0.09038	0.5869	none	none	none	none	none	none
ENSMUSG00000026278	Bok	none	106.369	0.496495	0.362821	72.9981	0.271021	0.791716	9.23689	-0.114277	0.994132	21.1322	-0.140894	0.873513	NA	NA	NA	0.03214	0.9048	none	none	none	none	none	none
ENSMUSG00000015943	Bola1	none	49.9322	0.767202	NA	40.8759	-0.203679	0.882577	47.9891	0.137369	0.991361	51.9262	0.207686	0.697215	25.776	0.00469826	0.997705	0.3265	0.4674	none	none	none	none	none	none
ENSMUSG00000047721	Bola2	none	78.0319	0.50727	NA	46.1728	-0.0675499	0.96924	92.9771	-0.173661	0.960281	112.666	0.321202	0.344553	64.7479	1.14357	0.109937	0.02382	0.9515	none	none	none	none	none	none
ENSMUSG00000045160	Bola3	none	25.851	0.0185262	NA	23.3085	-0.481182	0.748092	58.0659	-0.566908	0.552732	112.237	-0.298689	0.381313	15.199	0.857584	0.625378	-0.146	0.6372	none	none	none	none	none	none
ENSMUSG00000022557	Bop1	none	341.682	0.188009	0.669596	362.64	0.0780202	0.914378	107.513	0.184583	0.95627	91.971	-0.249939	0.552217	36.7349	0.50834	0.670585	-0.05831	0.7845	none	none	none	none	none	none
ENSMUSG00000022070	Bora	none	6.16414	-0.426674	NA	6.15911	-0.0875387	NA	4.89865	0.148026	0.994132	3.75143	1.04352	0.505233	NA	NA	NA	NA	NA	none	none	none	none	none	none
ENSMUSG00000042992	Borcs5	none	249.13	0.102857	0.855177	243.481	-0.209497	0.616851	160.753	-0.0182833	0.994132	127.625	-0.220586	0.541445	17.544	0.188939	0.93453	NA	NA	none	none	none	none	none	none
ENSMUSG00000045176	Borcs6	none	42.0974	0.39692	NA	32.1562	-0.419519	0.714997	21.4674	0.235921	0.980439	29.2991	0.135086	0.857126	15.3439	0.838134	0.63134	NA	NA	none	none	none	none	none	none
ENSMUSG00000062376	Borcs7	none	125.541	0.138682	0.853989	123.728	-0.119564	0.904773	131.574	-0.156102	0.958839	160.641	0.264146	0.421106	68.9779	1.08766	0.110958	NA	NA	none	none	none	none	none	none
ENSMUSG00000002345	Borcs8	none	68.0255	0.516764	NA	32.6928	-0.216696	0.894817	42.7932	0.49261	0.796011	79.8483	0.259528	0.539423	25.344	0.479995	0.754818	NA	NA	none	none	none	none	none	none
ENSMUSG00000038871	Bpgm	none	157.953	0.0516915	0.95345	148.699	-0.430612	0.381744	89.5195	0.0568544	0.994132	389.846	0.319127	0.184934	28.057	-0.515222	0.704878	0.0837	0.5684	none	none	none	none	none	none
ENSMUSG00000038286	Bphl	none	149.786	0.173252	0.792318	203.105	-0.09629	0.902869	107.105	-0.0331824	0.994132	180.587	0.0913184	0.793858	48.4745	0.204797	0.880068	0.1097	0.5534	none	none	none	none	none	none
ENSMUSG00000026617	Bpnt1	none	311.164	0.322629	0.397188	329.12	0.0331548	0.96924	206.577	0.0321221	0.994132	192.755	-0.115142	0.728369	68.394	-0.322516	0.74394	-0.1752	0.1559	none	none	none	none	none	none
ENSMUSG00000040481	Bptf	none	618.17	0.0786121	0.864598	846.511	0.340804	0.204132	405.7	-0.246248	0.768394	354.097	-0.293128	0.252735	267.29	-0.316922	0.56377	-0.1354	0.3297	none	none	none	none	none	none
ENSMUSG00000002413	Braf	none	849.606	-0.0787902	0.831415	1066.45	0.0113599	0.984722	535.013	0.0184085	0.994132	365.402	0.128061	0.660881	84.4301	-0.0678204	0.964934	-0.08603	0.5749	none	none	none	none	none	none
ENSMUSG00000029458	Brap	none	354.259	0.17361	0.695168	288.382	-0.087007	0.908058	168.639	-0.198279	0.918876	143.957	-0.0349128	0.937459	93.5727	0.134118	0.905892	-0.03895	0.7977	none	none	none	none	none	none
ENSMUSG00000000148	Brat1	none	53.1106	0.200103	NA	45.7646	0.455547	0.581953	32.5003	0.495422	0.830808	53.9998	0.265846	0.56159	29.5706	0.457117	0.754155	NA	NA	none	none	none	none	none	none
ENSMUSG00000017146	Brca1	none	9.07128	-0.308683	NA	NA	NA	NA	8.54001	-1.25559	0.590285	9.95213	1.0303	0.234089	NA	NA	NA	0.8586	0.02383	none	none	none	none	none	none
ENSMUSG00000041147	Brca2	none	21.5541	-0.184311	NA	24.2547	0.347403	0.875173	32.1553	0.319386	0.950864	20.1215	0.58884	0.356177	23.3642	-0.392849	0.819587	0.5067	0.07989	none	none	none	none	none	none
ENSMUSG00000031201	Brcc3	none	236.887	-0.0425998	0.954345	372.723	-0.0151663	0.984076	208.621	0.00531857	0.997323	128.44	-0.0568877	0.899131	55.6268	0.0853291	0.958288	-0.1219	0.4751	none	none	none	none	none	none
ENSMUSG00000022387	Brd1	none	269.576	-0.120963	0.817285	256.075	0.282566	0.390985	96.8153	0.00899721	0.997183	97.9976	-0.131611	0.750582	84.1544	-0.0634691	0.965471	-0.08969	0.5258	none	none	none	none	none	none
ENSMUSG00000024335	Brd2	none	500.988	-0.0925821	0.84021	599.138	-0.0726224	0.89002	240.927	0.150592	0.953378	250.819	-0.0775659	0.831252	180.126	0.256264	0.703096	0.09668	0.5075	none	none	none	none	none	none
ENSMUSG00000026918	Brd3	none	217.543	-0.167485	0.751525	197.53	-0.0540861	0.954733	133.265	-0.170313	0.9512	157.223	-0.203476	0.548201	51.8665	0.69119	0.414568	-0.08186	0.5788	none	none	none	none	none	none
ENSMUSG00000109946	Brd3os	none	99.3892	-0.365143	0.564092	80.2484	0.13954	0.899293	53.4393	-0.0853173	0.994132	45.1437	0.0792839	0.906819	NA	NA	NA	NA	NA	none	none	none	none	none	none
ENSMUSG00000024002	Brd4	none	488.246	-0.294685	0.314134	549.574	-0.179172	0.663231	306.597	-0.135058	0.956487	150.535	-0.389317	0.175739	157.182	-0.0593189	0.95617	-0.1003	0.4262	none	none	none	none	none	none
ENSMUSG00000031660	Brd7	none	186.704	-0.282604	0.566333	166.168	-0.0539014	0.961577	92.8659	-0.108618	0.989251	146.695	0.0221714	0.965717	91.4743	0.0765283	0.951513	-0.00561	0.9811	none	none	none	none	none	none
ENSMUSG00000003778	Brd8	none	468.431	0.074842	0.895856	420.844	0.128866	0.788037	549.322	-0.178257	0.887528	302.999	-0.156178	0.572797	139.791	-0.705871	0.142384	-0.05076	0.746	none	none	none	none	none	none
ENSMUSG00000057649	Brd9	none	241.981	-0.2252	0.650695	289.334	-0.318602	0.268495	86.6302	-0.0381584	0.994132	115.737	0.0608877	0.895112	30.8832	-0.157598	0.931085	-0.5158	1.25e-06	none	none	none	none	none	none
ENSMUSG00000029279	Brdt	none	118.969	-0.97192	0.0131927	180.085	0.590398	0.152821	48.8874	0.183986	0.979472	132.006	0.503147	0.0743383	7.09	-0.375929	0.926259	0.09831	0.6579	none	none	none	none	none	none
ENSMUSG00000011158	Brf1	none	193.376	-0.172853	0.764096	217.956	-0.0836884	0.91945	68.1101	0.192629	0.964767	164.951	0.160613	0.621668	67.2064	-0.0423956	0.980807	0.1146	0.4224	none	none	none	none	none	none
ENSMUSG00000031487	Brf2	none	78.332	0.237272	NA	75.4529	0.0463332	0.976808	22.2677	0.128674	0.994132	34.8472	0.0886904	0.903516	10.3355	0.0443736	0.990867	-0.05149	0.8476	none	none	none	none	none	none
ENSMUSG00000047843	Bri3	none	61.8998	0.393301	NA	47.0045	0.229423	0.856321	33.408	0.00830577	0.997323	80.8119	0.410072	0.221477	142.62	0.866799	0.0775731	0.4936	0.003357	none	none	none	none	none	none
ENSMUSG00000037905	Bri3bp	none	314.995	0.0110573	0.989836	250.525	-0.435866	0.0715467	356.165	-0.376039	0.425716	285.682	-0.422085	0.127256	43.0106	0.466046	0.686353	-0.4554	5.274e-06	none	none	none	none	none	none
ENSMUSG00000028351	Brinp1	none	1529.77	-0.0424009	0.918333	1676.84	0.0799737	0.864283	333.693	-0.0697353	0.98964	372.949	-0.191128	0.58423	49.474	-1.56078	0.0173639	NA	NA	none	none	none	none	decreasing+neuronal	none
ENSMUSG00000004031	Brinp2	none	531.318	0.185149	0.606812	236.21	-0.262944	0.547711	143.407	0.161828	0.957654	209.711	0.0789021	0.850697	16.7219	-1.80112	0.162659	NA	NA	none	none	none	none	none	none
ENSMUSG00000035131	Brinp3	none	234.174	-0.0642108	0.927672	64.6963	-0.597427	0.296667	81.4211	-0.0490292	0.994132	341.926	0.313569	0.17646	11.6639	-1.33932	0.500157	NA	NA	none	none	none	none	none	none
ENSMUSG00000085208	Brip1os	none	36.4379	0.323875	NA	22.3471	-0.383062	0.806321	180.975	-0.117101	0.980439	233.835	0.457882	0.114577	163.282	0.223298	0.774055	NA	NA	none	none	none	none	none	none
ENSMUSG00000022247	Brix1	none	240.764	-0.397563	0.321442	243.224	0.0901811	0.898155	134.502	-0.047213	0.994132	149.711	0.0216813	0.966851	69.8559	0.268053	0.797675	-0.05988	0.7968	none	none	none	none	none	none
ENSMUSG00000033940	Brk1	none	709.166	-0.367393	0.127868	761.321	0.0752491	0.928929	272.22	0.0498283	0.994132	764.097	0.110521	0.679685	541.662	0.0828967	0.90511	NA	NA	none	none	none	none	none	none
ENSMUSG00000080268	Brms1	none	101.519	-0.171591	0.829649	76.6848	0.166881	0.874378	19.8865	0.225385	0.983338	49.9018	0.063894	0.921772	52.5349	0.339647	0.763666	0.1707	0.3311	none	none	none	none	none	none
ENSMUSG00000012076	Brms1l	none	341.013	-0.175701	0.679176	334.801	-0.105775	0.856869	247.812	-0.193709	0.902699	137.108	-0.0836805	0.841968	35.1065	0.074551	0.973735	-0.3224	0.005351	none	none	none	none	none	none
ENSMUSG00000046836	Brox	none	73.5289	0.262997	NA	97.1557	-0.122858	0.908342	85.6654	-0.00459166	0.997323	59.2451	-0.0672709	0.910282	43.3834	0.445218	0.695995	0.2378	0.04505	none	none	none	none	none	none
ENSMUSG00000001632	Brpf1	none	145.852	-0.0678763	0.938057	158.656	0.166235	0.817017	69.0149	-0.0915678	0.992723	27.649	-0.3687	0.564901	45.0656	-0.207032	0.88843	-0.004815	0.9826	none	none	none	none	none	none
ENSMUSG00000063952	Brpf3	none	153.214	0.140348	0.841914	119.533	-0.0247725	0.982151	28.1374	-0.0472278	0.994132	42.7549	-0.170665	0.787577	14.5531	-0.0938953	0.978072	-0.08804	0.5668	none	none	none	none	none	none
ENSMUSG00000035390	Brsk1	none	500.488	0.51586	0.038779	352.359	-0.00558169	0.993322	247.829	0.231217	0.845874	117.475	0.0981314	0.81584	24.1585	-2.42252	0.0093901	-0.2761	0.05481	none	none	none	none	decreasing+neuronal	none
ENSMUSG00000053046	Brsk2	none	740.308	0.0888119	0.825405	469.354	0.00791643	0.991618	307.108	0.0712577	0.991361	110.718	0.049912	0.923289	31.8896	-2.56443	0.00283351	-0.2028	0.1063	none	none	none	none	decreasing+neuronal	none
ENSMUSG00000022914	Brwd1	none	352.336	-0.109137	0.825996	447.956	0.0838036	0.881995	190.351	-0.107503	0.979472	165.823	-0.339698	0.213177	93.6257	-0.97185	0.0548902	-0.3288	0.01025	none	none	none	none	none	none
ENSMUSG00000063663	Brwd3	none	36.983	0.139168	NA	51.6621	1.11764	0.0160248	25.4344	-0.265603	0.972154	37.1518	-0.311604	0.588998	45.5572	0.684925	0.464962	0.193	0.6149	none	increasing	none	none	none	none
ENSMUSG00000071657	Bscl2	none	651.6	0.114884	0.76026	428.107	-0.111745	0.84102	356.688	0.106379	0.970076	357.788	-0.0108156	0.97996	123.124	0.172525	0.852367	0.07239	0.6907	none	none	none	none	none	none
ENSMUSG00000040859	Bsdc1	none	260.721	0.343069	0.417163	191.19	0.211821	0.74461	138.491	0.169868	0.953003	297.782	0.167578	0.566798	91.1233	-0.0135854	0.991725	0.1256	0.338	none	none	none	none	none	none
ENSMUSG00000023175	Bsg	none	3688.71	0.00218545	0.998239	2975.08	-0.231583	0.245982	6310.34	-0.412451	0.201277	7633.07	-0.321174	0.0725052	2740.45	0.431864	0.143326	-0.2769	0.04283	none	none	none	none	none	none
ENSMUSG00000032589	Bsn	none	3474.11	0.308783	0.0825896	2072.84	0.267934	0.176586	991.501	-0.239962	0.703411	867.974	-0.258586	0.329871	112.45	-1.80912	3.49592e-05	-0.1883	0.3425	none	none	none	none	decreasing+neuronal	none
ENSMUSG00000046718	Bst2	none	17.7045	3.23471	NA	21.3102	1.76535	0.0125108	4.74917	1.71561	0.59843	275.766	1.85562	2.11927e-13	504.683	1.26799	3.5938e-06	3.127	8.933e-39	none	increasing	none	increasing	increasing	increasing
ENSMUSG00000040565	Btaf1	none	411.149	-0.808772	0.371611	430.704	-0.0771043	0.941153	209.281	0.248068	0.887528	371.61	-0.300507	0.298594	180.48	0.639116	0.176118	-0.2017	0.3704	none	none	none	none	none	none
ENSMUSG00000025103	Btbd1	none	124.103	0.0175302	0.987089	135.829	0.384704	0.444035	63.9318	0.362061	0.846717	268.959	0.240172	0.345283	31.2075	-0.892212	0.383346	-0.001817	0.992	none	none	none	none	none	none
ENSMUSG00000038187	Btbd10	none	1016.4	-0.154734	0.625643	669.609	-0.0144631	0.982131	285.399	0.109247	0.975974	164.758	-0.0172946	0.974125	36.4635	-0.582456	0.610034	-0.2946	0.01743	none	none	none	none	none	none
ENSMUSG00000020042	Btbd11	none	37.314	0.146371	NA	5.59328	-1.05833	NA	297.763	0.151402	0.948922	25.3679	-0.330266	0.649073	8.04274	-1.9885	0.291239	-0.5149	0.02213	none	none	none	none	none	none
ENSMUSG00000000202	Btbd17	none	8.15636	0.0118382	NA	4.06451	0.410348	NA	4.51241	-0.375746	0.991361	773.283	-1.84014	3.52046e-23	NA	NA	NA	-0.6097	0.03257	none	none	none	decreasing	none	none
ENSMUSG00000073771	Btbd19	none	13.154	-0.418488	NA	12.3025	0.369686	0.879998	NA	NA	NA	4.45826	1.19632	0.410137	13.0754	0.416031	0.868364	-0.141	0.6452	none	none	none	none	none	none
ENSMUSG00000003344	Btbd2	none	255.458	0.277705	0.496927	201.556	-0.053819	0.959607	167.576	0.259358	0.84254	114.851	0.000579007	0.998872	38.6593	-0.478	0.683992	0.04979	0.8198	none	none	none	none	none	none
ENSMUSG00000062098	Btbd3	none	833.534	-0.332335	0.153248	1713.91	0.00036327	0.999088	840.548	-0.137324	0.929693	464.972	-0.656488	0.00107183	66.9933	-1.54234	0.00411676	-0.402	0.02506	none	none	none	none	decreasing+neuronal	none
ENSMUSG00000002803	Btbd6	none	119.728	0.266483	0.68041	89.0327	-0.0863472	0.942708	41.8048	0.639435	0.52883	52.966	0.474603	0.239385	25.0026	-0.63038	0.641906	-0.2642	0.04196	none	none	none	none	none	none
ENSMUSG00000041702	Btbd7	none	21.263	0.583304	NA	19.9667	0.649779	0.586304	10.7476	-0.316974	0.983338	98.6532	0.869876	0.00131229	36.3158	-0.163928	0.926567	0.387	0.01273	none	none	none	none	none	none
ENSMUSG00000111375	Btbd8	none	1676.46	-0.281965	0.146131	1082.82	-0.0911506	0.849791	470.967	-0.089927	0.977337	206.784	-0.7508	0.000604909	30.0835	-1.06204	0.257063	-0.5787	0.2201	none	none	none	none	none	none
ENSMUSG00000062202	Btbd9	none	358.118	0.181587	0.673957	904.689	0.358843	0.0531395	109.528	0.06248	0.994132	133.684	0.0971136	0.821731	52.4473	0.121743	0.932034	0.02227	0.9163	none	none	none	none	none	none
ENSMUSG00000021900	Btd	none	52.8777	-0.261687	NA	33.9486	-0.51693	0.576232	46.4287	-0.219068	0.965574	534.641	-0.40023	0.102384	101.204	-0.0825453	0.941659	0.5529	0.00183	none	none	none	none	none	none
ENSMUSG00000021660	Btf3	none	253.052	0.0928326	0.890399	131.068	-0.320088	0.575624	185.77	-0.19715	0.897824	253.639	0.368513	0.157592	170.933	0.244571	0.727781	0.2046	0.1427	none	none	none	none	none	none
ENSMUSG00000028568	Btf3l4	none	6.85428	0.183353	NA	4.37346	-0.461406	NA	7.35812	0.0322639	0.997183	10.2752	0.846692	0.329751	5.6516	0.285432	0.944544	0.1165	0.4493	none	none	none	none	none	none
ENSMUSG00000036478	Btg1	none	73.7308	-0.437188	NA	91.9795	-0.546007	0.273501	204.073	-0.147091	0.96197	167.021	-0.223422	0.498202	212.009	1.07759	0.00291807	0.2552	0.1918	none	none	none	none	increasing	none
ENSMUSG00000020423	Btg2	none	32.5212	-0.257767	NA	38.9431	-0.0766629	0.970437	6.97934	0.559456	0.957669	25.6682	-0.029152	0.976038	74.243	0.263376	0.816261	-0.06166	0.8241	none	none	none	none	none	none
ENSMUSG00000025217	Btrc	none	815.865	-0.045787	0.92039	743.75	-0.0859911	0.856869	333.218	0.0694888	0.990737	244.033	-0.179971	0.511734	71.5311	-0.488061	0.568873	-0.4202	3.535e-05	none	none	none	none	none	none
ENSMUSG00000066979	Bub3	none	455.256	0.0969837	0.826299	510.971	0.0666602	0.908168	244.273	-0.0736024	0.991361	196.521	0.170701	0.591829	154.832	-0.0583532	0.956602	-0.09102	0.5234	none	none	none	none	none	none
ENSMUSG00000032077	Bud13	none	57.9346	0.0378599	NA	37.9527	-0.183143	0.905046	27.1752	-0.371348	0.939043	22.2383	-0.266888	0.723539	25.1531	-0.535876	0.708494	-0.06609	0.8195	none	none	none	none	none	none
ENSMUSG00000005378	Bud23	none	116.618	0.182083	0.800497	97.6666	0.00721201	0.994613	46.3835	0.116364	0.991399	66.5052	0.200388	0.668506	34.1875	-0.059348	0.980765	NA	NA	none	none	none	none	none	none
ENSMUSG00000038722	Bud31	none	404.304	-0.106907	0.825438	308.002	-0.113749	0.834008	274.487	-0.151848	0.939405	347.58	-0.0127112	0.97487	168.283	0.882335	0.0464717	-0.05	0.8088	none	none	none	none	none	none
ENSMUSG00000071317	Bves	none	6.07606	0.180641	NA	30.7163	0.0987872	0.968072	5.11138	-0.444813	0.983338	10.0698	-0.640531	0.50011	NA	NA	NA	-0.1053	0.8261	none	none	none	none	none	none
ENSMUSG00000023988	Bysl	none	162.183	0.199146	0.740731	122.244	0.0640349	0.951869	52.3346	0.0954606	0.993124	52.3995	0.164677	0.763101	21.9775	-0.0458609	0.987513	-0.1409	0.4035	none	none	none	none	none	none
ENSMUSG00000051223	Bzw1	none	911.538	-0.283106	0.362821	802.109	0.136441	0.694407	557.115	0.0243537	0.994132	715.024	0.0806481	0.801281	320.95	0.354624	0.493412	-0.03683	0.8131	none	none	none	none	none	none
ENSMUSG00000020547	Bzw2	none	190.133	0.252298	0.629352	354.278	-0.0877018	0.881738	217.357	-0.0293279	0.994132	99.4176	-0.395326	0.290582	33.362	-1.04956	0.242987	-0.3525	0.004444	none	none	none	none	none	none
ENSMUSG00000060380	C030014I23Rik	none	10.5387	-0.429422	NA	8.87368	-0.922216	NA	9.11154	-0.522509	0.957654	12.3251	-0.0812242	0.947676	NA	NA	NA	NA	NA	none	none	none	none	none	none
ENSMUSG00000052848	C130026L21Rik	none	21.9337	-0.330322	NA	19.1465	-0.299228	0.881466	NA	NA	NA	17.1678	0.285559	0.742413	NA	NA	NA	-0.3974	0.219	none	none	none	none	none	none
ENSMUSG00000073627	C130036L24Rik	none	NA	NA	NA	7.77059	0.610735	NA	NA	NA	NA	NA	NA	NA	NA	NA	NA	-0.1834	0.7426	none	none	none	none	none	none
ENSMUSG00000085154	C130046K22Rik	none	10.393	-0.576738	NA	4.76	0.00549523	NA	6.21103	-0.754646	0.935569	6.1775	0.436214	0.753669	NA	NA	NA	NA	NA	none	none	none	none	none	none
ENSMUSG00000050334	C130071C03Rik	none	158.79	-0.113368	0.870654	183.641	-0.048358	0.964869	96.4182	0.0280025	0.994132	151.186	-0.265442	0.40426	8.43924	-0.0643283	0.987781	0.01742	0.9716	none	none	none	none	none	none
ENSMUSG00000039349	C130074G19Rik	none	143.15	0.0666263	0.941395	NA	NA	NA	NA	NA	NA	21.9192	0.277928	0.755571	4.0233	-1.4553	0.656567	-0.6724	0.01466	none	none	none	none	none	none
ENSMUSG00000000581	C1d	none	323.219	-0.0858921	0.870654	358.539	0.231853	0.517344	234.145	0.020706	0.994132	265.534	0.454006	0.0395857	125.066	0.562445	0.331839	0.03637	0.8575	none	none	none	none	none	none
ENSMUSG00000042460	C1galt1	none	54.716	-0.377205	NA	47.7125	-0.160648	0.909682	22.3349	-0.125274	0.994132	113.3	0.0477093	0.927922	22.6906	1.07202	0.386072	0.2391	0.3827	none	none	none	none	none	none
ENSMUSG00000048970	C1galt1c1	none	326.727	-0.645478	0.0145784	529.143	-0.214034	0.666011	437.547	-0.139565	0.958839	541.159	-0.692	0.000290667	202.799	0.647339	0.129721	-0.2546	0.1249	none	none	none	none	none	none
ENSMUSG00000036887	C1qa	none	159.17	1.88824	1.63059e-09	36.239	-0.0551092	0.994613	65.7959	1.58977	0.565129	145.942	2.27628	3.02641e-17	25380.9	1.04124	4.93783e-06	3.469	2.275e-112	increasing	none	none	increasing	increasing	increasing
ENSMUSG00000036905	C1qb	none	142.876	2.26105	0.0141259	28.071	-0.358248	0.952064	47.8653	1.83343	0.523358	109.819	2.32505	4.57227e-14	19712.2	0.935328	0.000298728	3.137	1.308e-118	increasing	none	none	increasing	none	increasing
ENSMUSG00000018446	C1qbp	none	447.86	0.272604	0.397802	573.762	-0.034459	0.966666	381.709	-0.0154908	0.994547	305.196	0.27521	0.266801	146.939	0.464404	0.425243	0.1289	0.3863	none	none	none	none	none	none
ENSMUSG00000036896	C1qc	none	99.6795	1.5092	0.000624849	19.88	-0.417173	0.957763	32.3432	1.71558	0.00694495	84.9303	1.85808	1.11736e-10	15260.3	0.995156	3.65369e-05	3.156	1.343e-106	increasing	none	increasing	increasing	none	increasing
ENSMUSG00000045532	C1ql1	none	NA	NA	NA	NA	NA	NA	14.4373	0.334251	0.983491	62.7537	2.95704	4.90363e-16	NA	NA	NA	0.3665	0.1866	none	none	none	increasing	none	none
ENSMUSG00000036907	C1ql2	none	13.4551	0.520505	NA	413.813	0.548241	0.0367991	16.4593	0.599291	0.885856	21.5076	0.856571	0.142305	NA	NA	NA	0.6775	0.006469	none	none	none	none	none	none
ENSMUSG00000049630	C1ql3	none	532.406	-0.0703625	0.891787	597.662	0.089471	0.867468	105.528	-0.314026	0.841932	330.983	0.00801603	0.986308	10.6944	-0.475328	0.850449	-0.1601	0.4505	none	none	none	none	none	none
ENSMUSG00000017446	C1qtnf1	none	10.4321	0.763947	NA	NA	NA	NA	6.37913	0.178201	0.994132	58.8988	3.19444	2.75058e-19	NA	NA	NA	1.973	2.627e-27	none	none	none	increasing	none	increasing
ENSMUSG00000023571	C1qtnf12	none	21.6416	-0.657884	NA	15.0053	-0.463986	0.805339	NA	NA	NA	8.91316	0.57479	0.606726	NA	NA	NA	NA	NA	none	none	none	none	none	none
ENSMUSG00000040794	C1qtnf4	none	1098.24	0.0368724	0.938057	627.788	-0.351396	0.170815	570.782	-0.241263	0.726519	356.934	-0.390892	0.184335	25.1846	-0.390408	0.81439	-0.1174	0.833	none	none	none	none	none	none
ENSMUSG00000055172	C1ra	none	23.1779	-0.380826	NA	7.3653	0.164262	NA	NA	NA	NA	35.8144	3.04959	3.4797e-12	11.8806	0.7089	0.749598	2.001	2.373e-13	none	none	none	increasing	none	increasing
ENSMUSG00000086181	C230034O21Rik	none	11.1517	-0.64742	NA	14.765	-0.411973	0.841247	5.88639	0.186409	0.994132	7.45773	-0.721647	0.512541	NA	NA	NA	NA	NA	none	none	none	none	none	none
ENSMUSG00000084915	C230037L18Rik	none	10.2572	0.723138	NA	7.91691	-1.11299	NA	11.5921	-0.270397	0.988825	26.9567	0.764372	0.152451	NA	NA	NA	NA	NA	none	none	none	none	none	none
ENSMUSG00000110523	C230057M02Rik	none	11.1615	0.579413	NA	6.60308	0.210259	NA	NA	NA	NA	5.84307	-1.20864	0.307693	NA	NA	NA	NA	NA	none	none	none	none	none	none
ENSMUSG00000063623	C230062I16Rik	none	7.52449	-0.424909	NA	6.79092	-0.051415	NA	NA	NA	NA	5.06715	0.778467	0.604667	NA	NA	NA	NA	NA	none	none	none	none	none	none
ENSMUSG00000045975	C2cd2	none	18.1612	0.121628	NA	17.8162	-0.0347171	0.989562	52.6022	-0.0439541	0.994132	15.5644	-0.491004	0.552635	18.7589	-0.0179263	0.993629	0.02286	0.9369	none	none	none	none	none	none
ENSMUSG00000032120	C2cd2l	none	664.365	0.0841227	0.856189	399.253	-0.097261	0.880606	125.114	0.0942466	0.991361	237.97	0.0900415	0.797319	35.4022	-0.505977	0.695765	-0.02119	0.912	none	none	none	none	none	none
ENSMUSG00000047248	C2cd3	none	189.803	-0.00557178	0.996434	170.323	0.115222	0.877655	78.7671	-0.168536	0.973749	114.732	0.295729	0.383193	61.4965	0.00413614	0.997254	0.05663	0.7893	none	none	none	none	none	none
ENSMUSG00000091956	C2cd4b	none	NA	NA	NA	15.6091	1.2096	0.264346	NA	NA	NA	NA	NA	NA	NA	NA	NA	0.3449	0.5277	none	none	none	none	none	none
ENSMUSG00000045912	C2cd4c	none	80.6161	0.329621	NA	38.0085	0.493389	0.580886	NA	NA	NA	19.3128	-0.670878	0.312681	NA	NA	NA	-0.4712	0.002392	none	none	none	none	none	none
ENSMUSG00000030279	C2cd5	none	256.575	-0.11504	0.832773	262.967	-0.100433	0.891674	124.908	-0.0590649	0.994132	63.5856	-0.673387	0.0426384	32.8347	-1.68956	0.0310328	NA	NA	none	none	none	none	decreasing+neuronal	none
ENSMUSG00000024164	C3	none	3.70408	5.1505	NA	NA	NA	NA	14.3863	1.09089	0.510497	1262.62	3.20737	3.83489e-50	489.498	4.07122	7.48433e-44	6.026	6.969e-60	none	none	none	increasing	increasing	increasing
ENSMUSG00000006423	C330007P06Rik	none	22.1858	0.0791301	NA	14.6851	0.0255178	0.99255	18.1727	0.29645	0.977337	49.4601	0.230654	0.657864	22.33	-0.243243	0.909126	0.00467	0.9845	none	none	none	none	none	none
ENSMUSG00000097093	C330013E15Rik	none	NA	NA	NA	NA	NA	NA	NA	NA	NA	6.85168	0.689117	0.553708	NA	NA	NA	0.581	0.2346	none	none	none	none	none	none
ENSMUSG00000024592	C330018D20Rik	none	50.33	-0.411376	NA	63.0559	-0.30582	0.710547	43.2086	-0.313499	0.937633	116.511	0.0744582	0.866461	27.6822	0.367999	0.830238	0.06791	0.7968	none	none	none	none	none	none
ENSMUSG00000040552	C3ar1	none	8.5063	1.35411	NA	3.03528	-0.764388	NA	4.42889	1.43928	0.780895	11.2123	2.12897	0.0038863	2198.56	1.30152	3.31876e-09	3.141	4.566e-49	none	none	none	increasing	increasing	increasing
ENSMUSG00000073418	C4b	none	148.681	3.97701	3.15385e-28	28.569	2.99394	3.01495e-07	66.2139	3.25366	2.68918e-19	6191.1	2.099	2.25979e-44	392.598	-0.0173058	0.987513	3.488	4.378e-86	increasing	increasing	increasing	increasing	none	increasing
ENSMUSG00000085408	C530005A16Rik	none	16.8197	-0.126534	NA	8.92759	-0.307947	NA	10.7849	0.448976	0.962425	10.9033	-0.821144	0.326935	NA	NA	NA	-0.4087	0.1525	none	none	none	none	none	none
ENSMUSG00000036377	C530008M17Rik	none	190.574	0.158571	0.788037	321.814	-0.478651	0.0650074	262.775	0.0002918	0.999397	235.952	-0.396388	0.13045	16.6583	-0.933991	0.551796	-0.5174	0.0001163	none	none	none	none	none	none
ENSMUSG00000097838	C530050E15Rik	none	5.13336	1.07927	NA	NA	NA	NA	NA	NA	NA	NA	NA	NA	NA	NA	NA	NA	NA	none	none	none	none	none	none
ENSMUSG00000084910	C630043F03Rik	none	8.37033	-0.261411	NA	27.0434	-0.567802	0.612501	4.75139	-0.327421	0.992723	38.6364	-1.29956	0.00088797	NA	NA	NA	-0.5403	0.006747	none	none	none	decreasing	none	none
ENSMUSG00000079105	C7	none	4.98721	-0.127012	NA	4.13099	0.643584	NA	NA	NA	NA	NA	NA	NA	NA	NA	NA	0.2054	0.7826	none	none	none	none	none	none
ENSMUSG00000114469	C730002L08Rik	none	38.9167	-0.188688	NA	9.11409	0.171322	NA	NA	NA	NA	18.0652	-0.629243	0.414413	NA	NA	NA	-1.224	0.002398	none	none	none	none	none	decreasing
ENSMUSG00000050390	C77080	none	32.5983	0.180288	NA	13.9952	-0.469941	0.845947	22.8036	-0.305198	0.966257	10.9247	0.316529	0.771535	9.44854	2.77045	0.157424	-0.1113	0.7855	none	none	none	none	none	none
ENSMUSG00000046679	C87436	none	40.8625	0.486756	NA	43.3718	-0.11879	0.942708	26.6167	-0.389245	0.924885	31.9502	-0.0960149	0.89655	23.813	-0.482539	0.763666	-0.002678	0.992	none	none	none	none	none	none
ENSMUSG00000028300	C9orf72	none	107.712	-0.202944	0.779222	135.945	0.000986115	0.998918	128.101	0.00268861	0.997356	87.7996	-0.0113671	0.98456	65.5259	1.97642	0.000310415	NA	NA	none	none	none	none	increasing	none
ENSMUSG00000028578	Caap1	none	48.533	-0.267995	NA	49.7923	0.199883	0.891674	41.4674	-0.2323	0.962425	43.0582	-0.0423417	0.953341	18.177	0.143205	0.954425	NA	NA	none	none	none	none	none	none
ENSMUSG00000036707	Cab39	none	1481.42	-0.404867	0.116294	1672.08	0.102601	0.808516	1227.62	0.0612252	0.991361	776.588	-0.0933537	0.750852	306.091	0.544834	0.170819	-0.1943	0.1333	none	none	none	none	none	none
ENSMUSG00000021981	Cab39l	none	105.971	-0.246268	0.722577	82.4432	-0.225018	0.791267	114.616	-0.231444	0.918876	164.255	0.107901	0.770523	62.321	0.161067	0.901222	-0.1551	0.5343	none	none	none	none	none	none
ENSMUSG00000019945	Cabcoco1	none	10.4805	0.888004	NA	5.55039	0.137664	NA	4.66995	0.636718	0.965574	13.2885	-0.664379	0.4517	NA	NA	NA	NA	NA	none	none	none	none	none	none
ENSMUSG00000020196	Cabin1	none	560.325	0.202761	0.621006	432.562	0.271963	0.306067	125.246	-0.00307061	0.997356	209.792	-0.0225197	0.96087	168.451	-0.249572	0.718307	0.06226	0.6684	none	none	none	none	none	none
ENSMUSG00000040957	Cables1	none	39.2685	0.662847	NA	9.45197	1.2996	NA	8.19086	0.246258	0.992723	152.693	-0.80014	0.00109839	55.2872	-0.203498	0.876027	0.2989	0.1542	none	none	none	none	none	none
ENSMUSG00000038990	Cables2	none	36.204	0.0928553	NA	28.4538	-0.286557	0.869189	45.3859	-0.369173	0.875278	9.80036	0.178753	0.888504	6.26893	-0.420299	0.909126	-0.4621	4.001e-05	none	none	none	none	none	none
ENSMUSG00000029544	Cabp1	none	479.839	-0.146921	0.729758	134.921	-0.427118	0.298296	170.351	0.0182852	0.994877	54.3169	-0.667861	0.0841099	7.22601	-1.5027	0.493749	-0.5856	3.616e-05	none	none	none	none	none	none
ENSMUSG00000009075	Cabp7	none	34.2029	0.359031	NA	412.459	0.149626	0.754423	195.17	0.0459314	0.994132	81.38	1.9689	0.00125045	6.99012	-2.86751	0.118859	-0.1601	0.4628	none	none	none	increasing	none	none
ENSMUSG00000015488	Cacfd1	none	32.8805	-0.118315	NA	26.6891	0.212961	0.912775	37.9404	0.0323592	0.994132	56.3322	-0.350019	0.429334	10.9387	-0.429508	0.871316	NA	NA	none	none	none	none	none	none
ENSMUSG00000028532	Cachd1	none	58.615	0.127617	NA	448.667	-0.322449	0.278748	134.161	-0.0119454	0.995891	616.344	-0.081694	0.817606	15.003	-1.60004	0.202144	-0.08609	0.6186	none	none	none	none	none	none
ENSMUSG00000034656	Cacna1a	none	942.638	-0.14034	0.65173	837.527	-0.18532	0.52239	1366.58	-0.0469849	0.992723	236.192	-0.229581	0.406247	97.4187	-1.38814	0.0165947	-0.323	0.008543	none	none	none	none	decreasing+neuronal	none
ENSMUSG00000004113	Cacna1b	none	706.402	0.113591	0.756286	805.532	-0.124155	0.762061	186.799	0.193722	0.918876	262.705	-0.335811	0.219868	40.8401	-2.51012	0.00187757	-0.3262	0.004424	none	none	none	none	decreasing+neuronal	none
ENSMUSG00000051331	Cacna1c	none	429.852	0.0970991	0.829649	625.009	0.018665	0.980505	215.7	-0.234502	0.855618	245.102	-0.438074	0.109961	31.3626	-2.34373	0.00208406	-0.2006	0.06001	none	none	none	none	decreasing+neuronal	none
ENSMUSG00000015968	Cacna1d	none	168.779	0.0972348	0.897743	187.284	0.112573	0.881553	131.447	0.169456	0.953003	171.665	0.350814	0.185853	117.753	1.11671	0.0539938	0.06913	0.6401	none	none	none	none	none	none
ENSMUSG00000004110	Cacna1e	none	2488.1	-0.0936698	0.753099	4587.22	-0.17218	0.561221	272.495	-0.0511898	0.994132	1107.93	-0.462794	0.0516095	103.346	-1.78315	0.000379474	-0.2545	0.1232	none	none	none	none	decreasing+neuronal	none
ENSMUSG00000020866	Cacna1g	none	190.349	0.0978629	0.888902	128.52	0.268669	0.632504	994.954	-0.29522	0.702568	73.4133	-0.454758	0.200877	26.2469	-1.68609	0.0996104	-0.1285	0.4635	none	none	none	none	none	none
ENSMUSG00000024112	Cacna1h	none	209.388	-0.184315	0.73215	600.802	0.436575	0.0408977	88.2152	-0.0803996	0.992723	187.855	0.0406014	0.929351	13.7112	-1.44869	0.343205	-0.1717	0.4318	none	none	none	none	none	none
ENSMUSG00000022416	Cacna1i	none	470.229	0.189994	0.597231	233.227	-0.168617	0.746575	195.53	-0.262877	0.817022	130.494	-0.695843	0.0215393	26.2002	-2.56491	0.00238221	-0.6454	9.487e-08	none	none	none	none	decreasing+neuronal	none
ENSMUSG00000040118	Cacna2d1	none	5341.71	-0.305754	0.0578206	5872.32	-0.219151	0.285775	740.425	-0.505515	0.249992	3963.05	-0.577301	0.0263335	142.919	-0.563102	0.340201	-0.4352	0.0001226	none	none	none	none	none	none
ENSMUSG00000010066	Cacna2d2	none	207.087	-0.544149	0.158398	70.8402	0.364345	0.601249	4273.85	-0.650339	0.0325769	609.817	-0.764141	4.18467e-05	67.6227	-1.52826	0.0260067	-0.2927	0.09379	none	none	none	none	decreasing+neuronal	none
ENSMUSG00000021991	Cacna2d3	none	1463.07	-0.111618	0.704251	1451.82	-0.284376	0.174738	699.45	-0.0691216	0.991361	579.742	-0.373846	0.157857	66.6195	-1.99637	0.000953567	-0.456	4.642e-05	none	none	none	none	decreasing+neuronal	none
ENSMUSG00000020882	Cacnb1	none	979.884	-0.0296038	0.957724	1011.27	-0.0194569	0.9775	51.5497	-0.224258	0.964767	157.549	-0.615883	0.0192522	11.8628	-0.591091	0.82623	-0.2022	0.1614	none	none	none	none	none	none
ENSMUSG00000057914	Cacnb2	none	176.951	-0.461949	0.275498	476.911	-0.0585982	0.924778	129.522	-0.259404	0.882391	83.5911	-0.00741614	0.990199	20.5367	-0.628773	0.683992	-0.1362	0.283	none	none	none	none	none	none
ENSMUSG00000003352	Cacnb3	none	607.577	0.0380359	0.942296	366.931	0.0314715	0.970655	40.7187	0.36979	0.895126	116.161	-0.266024	0.460739	12.7608	-1.56696	0.325636	-0.3766	0.001468	none	none	none	none	none	none
ENSMUSG00000017412	Cacnb4	none	1212.44	-0.174052	0.506358	577.11	-0.43753	0.0501638	934.764	-0.327115	0.280361	248.846	-0.0555072	0.888487	41.9385	-1.20684	0.147776	-0.4206	0.01791	none	none	none	none	none	none
ENSMUSG00000019146	Cacng2	none	213.595	0.177141	0.733099	105.96	-0.0139161	0.991234	432.275	-0.192152	0.842567	71.057	-0.274309	0.499391	12.4323	-1.01245	0.592256	-0.4451	0.0006331	none	none	none	none	none	none
ENSMUSG00000066189	Cacng3	none	566.461	-0.308903	0.309016	254.848	-0.35715	0.213037	39.6231	0.0609467	0.994132	199.627	-0.414657	0.268835	14.9918	-0.691513	0.71221	-0.6239	1.314e-06	none	none	none	none	none	none
ENSMUSG00000020723	Cacng4	none	23.2947	-0.67279	NA	NA	NA	NA	6.74053	-0.260547	0.992723	120.815	0.457805	0.169735	NA	NA	NA	0.2137	0.4691	none	none	none	none	none	none
ENSMUSG00000040373	Cacng5	none	55.9899	0.212092	NA	20.6215	0.261719	0.899293	42.3102	-0.63519	0.524494	571.381	-0.16533	0.646885	NA	NA	NA	0.05415	0.8542	none	none	none	none	none	none
ENSMUSG00000078815	Cacng6	none	NA	NA	NA	3.49047	-0.565004	NA	NA	NA	NA	NA	NA	NA	NA	NA	NA	-0.07104	0.9334	none	none	none	none	none	none
ENSMUSG00000069806	Cacng7	none	139.951	0.0321119	0.974791	70.1316	0.0430038	0.977112	370.549	-0.218563	0.87791	211.645	0.227146	0.567274	18.9147	-2.01337	0.0647958	-0.3806	0.0003932	none	none	none	none	none	none
ENSMUSG00000053395	Cacng8	none	833.313	0.0177845	0.977701	2393.24	-0.0870205	0.859224	176.558	0.0381547	0.994132	566.724	-0.471203	0.0207883	17.0375	-0.742832	0.664761	-0.2298	0.2378	none	none	none	none	none	none
ENSMUSG00000034889	Cactin	none	45.9464	-0.215863	NA	31.1496	-0.225827	0.891674	19.0634	-0.0373978	0.995129	26.1015	-0.510784	0.376393	17.7378	0.104438	0.970682	NA	NA	none	none	none	none	none	none
ENSMUSG00000033417	Cacul1	none	237.026	-0.143653	0.788422	207.063	0.203825	0.679314	170.65	-0.130714	0.977729	284.72	0.0592403	0.866996	130.686	1.16436	0.00993217	NA	NA	none	none	none	none	increasing	none
ENSMUSG00000014226	Cacybp	none	527.939	-0.309248	0.305586	640.348	0.0742409	0.908168	478.333	-0.109865	0.967268	406.456	-0.176399	0.509353	92.5966	0.237398	0.811329	-0.2751	0.03702	none	none	none	none	none	none
ENSMUSG00000013629	Cad	none	86.5955	0.585426	NA	85.3541	0.0413573	0.977112	61.3054	-0.126175	0.989195	110.372	-0.355729	0.31158	72.4981	-0.792545	0.204508	0.1792	0.2726	none	none	none	none	none	none
ENSMUSG00000032076	Cadm1	none	1817.12	-0.208129	0.416457	1969.03	-0.448576	0.035359	1082.48	-0.302124	0.634758	5655.46	-0.303964	0.147973	1312.31	1.04557	1.61412e-05	-0.05081	0.785	none	none	none	none	increasing	none
ENSMUSG00000064115	Cadm2	none	3393.1	-0.178564	0.498748	3794.44	-0.249859	0.228696	1809.79	-0.41475	0.349485	3931.76	-0.268058	0.177671	118.331	-1.20239	0.0574164	-0.1876	0.217	none	none	none	none	none	none
ENSMUSG00000005338	Cadm3	none	6394.83	-0.108316	0.655531	4440.51	-0.127818	0.690279	6065.25	-0.478159	0.0636421	3594.68	-0.12136	0.723898	222.738	-1.13728	0.00662278	-0.1078	0.5476	none	none	none	none	decreasing+neuronal	none
ENSMUSG00000054793	Cadm4	none	950.457	-0.00621082	0.992585	241.877	-0.432287	0.104151	671.399	-0.24227	0.778588	4381.82	0.456776	0.0378074	59.7348	-0.586676	0.539944	0.7416	1.593e-09	none	none	none	none	none	none
ENSMUSG00000054423	Cadps	none	2924.85	-0.0190012	0.963544	2573.75	-0.127191	0.661587	3387.96	0.142845	0.875278	497.393	0.0998811	0.741169	142.271	-2.27122	4.67895e-06	-0.3407	0.007233	none	none	none	none	decreasing+neuronal	none
ENSMUSG00000017978	Cadps2	none	929.263	-0.130153	0.691686	949.479	-0.484015	0.00559863	424.639	-0.226345	0.792876	152.179	-0.250725	0.460739	33.8965	-2.51933	0.00157976	-0.887	1.409e-18	none	none	none	none	decreasing+neuronal	none
ENSMUSG00000044566	Cage1	none	26.3272	-0.213704	NA	20.4059	0.514912	0.723763	5.98549	0.066912	0.995129	8.94475	0.275656	0.821625	4.65632	-1.46835	0.633702	-0.1613	0.695	none	none	none	none	none	none
ENSMUSG00000028222	Calb1	none	907.777	-0.103504	0.779222	1411.41	0.0659508	0.913529	10597.3	-0.397865	0.0564495	280.271	-0.559922	0.0280026	97.0682	-1.35472	0.0389156	-0.8422	7.87e-16	none	none	none	none	decreasing+neuronal	none
ENSMUSG00000003657	Calb2	none	51.655	-0.302466	NA	151.877	0.231364	0.947779	1115.88	-0.385746	0.249298	190.593	-0.482861	0.076054	23.6934	-0.467603	0.785498	0.1421	0.6599	none	none	none	none	none	none
ENSMUSG00000023055	Calcoco1	none	302.308	0.059367	0.925141	317.82	-0.229362	0.58586	133.801	-0.150872	0.973539	181.93	-0.312448	0.251785	82.3611	-0.382555	0.647278	0.01781	0.9128	none	none	none	none	none	none
ENSMUSG00000023964	Calcr	none	4.62798	0.305254	NA	NA	NA	NA	NA	NA	NA	36.0304	0.239476	0.718011	NA	NA	NA	NA	NA	none	none	none	none	none	none
ENSMUSG00000059588	Calcrl	none	7.33063	0.0439625	NA	15.6806	-0.356539	0.868981	NA	NA	NA	146.304	0.646532	0.0131124	110.05	-0.721329	0.176784	0.1981	0.417	none	none	none	none	none	none
ENSMUSG00000029761	Cald1	none	26.2591	0.41117	NA	58.9748	0.593634	0.350074	60.0156	0.171467	0.979472	137.079	0.207469	0.540844	6.79971	-1.98462	0.343659	-0.01601	0.9511	none	none	none	none	none	none
ENSMUSG00000033033	Calhm2	none	33.0649	0.260594	NA	25.9239	-0.554582	0.609054	NA	NA	NA	19.3665	0.0219077	0.984477	68.8741	0.918945	0.146314	-0.0719	0.8613	none	none	none	none	none	none
ENSMUSG00000049872	Calhm5	none	54.133	0.126974	NA	73.4366	0.0104845	0.993322	9.32297	-0.0485277	0.995591	32.8347	0.284409	0.624022	NA	NA	NA	NA	NA	none	none	none	none	none	none
ENSMUSG00000001175	Calm1	none	25187.5	-0.217934	0.416187	30923.3	0.195846	0.324236	20518.1	-0.130928	0.924628	12296.6	-0.130842	0.610991	2009.12	0.522391	0.0754565	-0.4062	0.0461	none	none	none	none	none	none
ENSMUSG00000036438	Calm2	none	6937.28	0.0262786	0.948081	6862.45	0.0996175	0.767362	6911.14	-0.251604	0.449405	2403.46	-0.0230884	0.956937	1068.98	-0.414046	0.20904	-0.5213	0.00183	none	none	none	none	none	none
ENSMUSG00000019370	Calm3	none	5870.08	0.342373	0.0206821	4464.86	-0.16172	0.601249	4137.02	-0.200323	0.731814	2832.65	0.157201	0.437784	484.158	-0.0698513	0.922514	-0.4391	0.01437	none	none	none	none	none	none
ENSMUSG00000060371	Caln1	none	343.725	0.314691	0.352816	306.549	-0.254553	0.462856	547.754	-0.0937394	0.973802	128.427	0.209419	0.582247	17.4806	-0.508548	0.78475	-0.1135	0.4935	none	none	none	none	none	none
ENSMUSG00000003814	Calr	none	5108.2	-0.331127	0.065994	6115.31	-0.314564	0.24113	3554.09	-0.423323	0.119498	7404.02	-0.362165	0.119511	4727.1	0.48211	0.0905532	-0.3785	0.004114	none	none	none	none	none	none
ENSMUSG00000019732	Calr3	none	NA	NA	NA	4.88264	2.12426	NA	20.8422	0.231463	0.980439	46.9218	-0.446313	0.356061	NA	NA	NA	0.6732	0.1033	none	none	none	none	none	none
ENSMUSG00000029767	Calu	none	478.732	-0.0939773	0.849203	537.491	-0.0113174	0.988347	543.072	-0.294914	0.619516	2570.37	0.17058	0.472996	694.049	0.530163	0.0980238	0.3079	0.003648	none	none	none	none	none	none
ENSMUSG00000025468	Caly	none	1343.19	0.0730491	0.829618	1976.73	-0.150514	0.575974	356.285	0.0164892	0.994132	483.28	-0.132797	0.653631	33.6597	-0.702009	0.516841	-0.1568	0.3383	none	none	none	none	none	none
ENSMUSG00000030272	Camk1	none	489.349	-0.0242363	0.967697	153.732	-0.218697	0.748672	118.428	0.157572	0.962425	233.261	-0.0796166	0.827157	565.687	0.240866	0.700074	0.421	0.002036	none	none	none	none	none	none
ENSMUSG00000039145	Camk1d	none	781.162	-0.176654	0.555701	1360.8	-0.0515387	0.935111	207.648	0.0697426	0.991361	166.646	-0.180272	0.592825	178.955	0.322952	0.626565	-0.1772	0.2169	none	none	none	none	none	none
ENSMUSG00000016179	Camk1g	none	342.171	0.258504	0.523701	257.092	-0.0718704	0.927249	98.7123	0.46218	0.489643	42.3152	-0.0180593	0.982633	10.4361	-1.9567	0.206643	-0.4548	0.00501	none	none	none	none	none	none
ENSMUSG00000024617	Camk2a	none	13226.8	0.337069	0.573163	26440.4	0.225447	0.240835	1034.14	-0.0961086	0.976814	2563.13	-0.14994	0.667759	480.808	-2.09558	3.87615e-09	-0.4916	0.03544	none	none	none	none	decreasing+neuronal	none
ENSMUSG00000057897	Camk2b	none	5055.97	0.194464	0.479231	9084.77	0.33089	0.0411544	2735	-0.0946641	0.963887	949.853	0.0634684	0.878132	221.949	-1.93425	1.32327e-07	-0.1281	0.6072	none	none	none	none	decreasing+neuronal	none
ENSMUSG00000053819	Camk2d	none	1442.75	-0.00525671	0.99314	491.007	-0.666739	0.676412	1379.97	-0.154289	0.887528	893.205	0.297856	0.198715	299.921	-0.183452	0.773942	0.03078	0.9286	none	none	none	none	none	none
ENSMUSG00000021820	Camk2g	none	2390.23	-0.134987	0.590297	1329.06	0.0584472	0.921487	1286.1	0.0211781	0.994132	1648.06	0.22505	0.304685	130.293	-1.17935	0.0278454	0.09616	0.5468	none	none	none	none	decreasing+neuronal	none
ENSMUSG00000046447	Camk2n1	none	3638.63	0.136758	0.656667	2896.64	-0.37613	0.019015	440.135	-0.245799	0.795539	2188.4	-0.407037	0.0110068	228.059	-0.409107	0.426691	-0.6166	0.00196	none	none	none	none	none	none
ENSMUSG00000051146	Camk2n2	none	228.616	0.451793	0.219663	106.738	-0.350827	0.650605	293.542	-0.159476	0.9512	129.603	0.169806	0.662894	13.2754	-1.38511	0.381601	-0.007553	0.9823	none	none	none	none	none	none
ENSMUSG00000038128	Camk4	none	1712.1	-0.331483	0.0870611	676.745	-0.295101	0.172248	846.577	-0.47826	0.0382536	209.93	-0.360732	0.22811	42.0846	-1.3778	0.114262	-0.5706	0.0006036	none	none	none	none	none	none
ENSMUSG00000020785	Camkk1	none	663.017	0.0703054	0.890466	1162.69	0.00799008	0.990159	136.682	0.154253	0.957654	130.149	-0.0618233	0.910672	20.3896	-1.55375	0.154	0.03473	0.868	none	none	none	none	none	none
ENSMUSG00000029471	Camkk2	none	899.616	-0.238287	0.349869	424.133	-0.524333	0.00455059	246.084	-0.346561	0.461771	169.637	-0.448398	0.164049	71.3956	-0.596396	0.412462	-0.7962	3.354e-11	none	none	none	none	none	none
ENSMUSG00000071037	Camkmt	none	79.7498	-0.113612	NA	112.16	-0.271559	0.643473	74.8444	-0.274022	0.918876	60.0273	0.0489205	0.935587	20.6024	-0.401354	0.829396	NA	NA	none	none	none	none	none	none
ENSMUSG00000032936	Camkv	none	2478.04	0.223911	0.425257	4317.58	-0.023863	0.966639	102.914	-0.0835458	0.993823	515.908	-0.215291	0.474326	86.4945	-2.1667	2.06759e-05	-0.2295	0.201	none	none	none	none	decreasing+neuronal	none
ENSMUSG00000021501	Caml	none	211.281	0.236213	0.630373	237.287	-0.101848	0.880204	95.882	0.0344208	0.994132	133.876	-0.154526	0.666827	49.0407	-0.0990035	0.949507	0.02311	0.911	none	none	none	none	none	none
ENSMUSG00000026933	Camsap1	none	665.029	-0.0708044	0.870654	414.827	-0.0136946	0.984722	223.693	0.14957	0.956332	115.274	-0.38158	0.206079	47.1597	-0.0661023	0.972455	-0.303	0.004857	none	none	none	none	none	none
ENSMUSG00000041570	Camsap2	none	1181.73	-0.0320612	0.948451	1331.91	0.185259	0.529992	797.914	-0.0261634	0.994132	680.326	-0.0153346	0.969411	133.156	-0.471124	0.437997	-0.07875	0.6239	none	none	none	none	none	none
ENSMUSG00000044433	Camsap3	none	202.659	0.272984	0.597231	150.921	0.155105	0.828962	121.683	0.177683	0.9512	52.1566	-0.425463	0.329684	NA	NA	NA	-0.1781	0.296	none	none	none	none	none	none
ENSMUSG00000014592	Camta1	none	1533.86	0.146904	0.643403	2227.67	0.177534	0.427006	992.981	0.14434	0.897824	374.945	0.126792	0.659455	108.071	-1.48277	0.00178406	-0.1834	0.2178	none	none	none	none	decreasing+neuronal	none
ENSMUSG00000040712	Camta2	none	1271.55	0.153353	0.582026	1889.82	0.16675	0.57858	445.58	-0.0955321	0.970586	352.899	-0.26648	0.299396	79.7776	-0.263336	0.795951	-0.3364	0.03597	none	none	none	none	none	none
ENSMUSG00000020114	Cand1	none	2750.65	-0.263923	0.185016	3154.97	-0.0617316	0.880204	2636.59	0.0626035	0.983133	1129.31	-0.302227	0.130785	310.934	0.143612	0.836851	-0.2412	0.03265	none	none	none	none	none	none
ENSMUSG00000030319	Cand2	none	8.6623	-0.552587	NA	8.28811	-0.750969	NA	3.78027	1.23166	0.88269	23.7263	-0.087947	0.927486	13.1781	-0.0955354	0.978795	0.5668	0.02328	none	none	none	none	none	none
ENSMUSG00000025575	Cant1	none	152.822	0.136163	0.837376	130.106	-0.239861	0.677438	107.195	-0.0745475	0.993224	134.419	-0.0853857	0.836947	121.064	0.873462	0.113217	0.1234	0.4239	none	none	none	none	none	none
ENSMUSG00000020368	Canx	none	4560.62	-0.346769	0.0494034	5147.07	-0.24689	0.187161	5699.07	-0.40378	0.280361	14574.7	-0.187258	0.380406	5321.58	0.151455	0.745705	-0.000121	0.9996	none	none	none	none	none	none
ENSMUSG00000028656	Cap1	none	2065.98	0.13653	0.605474	2948.1	0.394294	0.00348421	963.872	-0.0311795	0.994132	1071.7	0.121957	0.603744	2291.69	0.197041	0.699741	-0.02138	0.9202	none	none	none	none	none	none
ENSMUSG00000021373	Cap2	none	1785.71	-0.127113	0.658914	1797.06	0.177212	0.524264	790.988	0.00221366	0.997323	637.642	-0.577046	0.0012656	28.1509	-1.76566	0.0378579	-0.563	1.079e-06	none	none	none	none	decreasing+neuronal	none
ENSMUSG00000024942	Capn1	none	220.613	0.121464	0.831415	164.26	-0.342631	0.372695	99.4977	0.157669	0.963887	72.2536	0.875537	0.00312028	49.6996	0.420563	0.715922	-0.1705	0.2699	none	none	none	none	none	none
ENSMUSG00000026270	Capn10	none	43.0401	0.0407464	NA	30.8085	-0.141804	0.941362	32.8953	-0.5208	0.812167	27.4254	-0.237235	0.729845	5.69542	0.573552	0.873183	-0.1278	0.4517	none	none	none	none	none	none
ENSMUSG00000054083	Capn12	none	NA	NA	NA	NA	NA	NA	NA	NA	NA	NA	NA	NA	NA	NA	NA	-0.6414	0.4359	none	none	none	none	none	none
ENSMUSG00000037326	Capn15	none	73.5381	0.227148	NA	61.5603	0.340664	0.714997	87.7771	-0.169504	0.971512	31.9849	-0.570322	0.2478	17.525	-0.575457	0.774997	NA	NA	none	none	none	none	none	none
ENSMUSG00000026509	Capn2	none	256.595	0.264535	0.523152	181.545	-0.157813	0.786876	342.203	-0.0358985	0.994132	607.799	0.483753	0.0085863	51.5836	-0.858046	0.340445	0.9124	6.991e-25	none	none	none	none	none	none
ENSMUSG00000079110	Capn3	none	25.5107	0.0750197	NA	68.3539	-0.704878	0.15424	2.92606	0.120174	0.994537	8.41563	-0.524675	0.648268	274.428	-0.776074	0.0440787	0.2434	0.201	none	none	none	none	none	none
ENSMUSG00000035547	Capn5	none	235.509	0.242638	0.593483	221.76	-0.464296	0.0749798	40.8034	-0.243616	0.958839	83.1639	0.783799	0.0156242	7.06256	0.677194	0.826701	-0.2795	0.01951	none	none	none	none	none	none
ENSMUSG00000067276	Capn6	none	6.33902	-0.327861	NA	NA	NA	NA	NA	NA	NA	4.31585	-1.07911	0.443006	NA	NA	NA	0.08857	0.8817	none	none	none	none	none	none
ENSMUSG00000021893	Capn7	none	224.784	-0.250357	0.586154	396.953	0.132798	0.791354	177.877	-0.165383	0.950864	125.742	-0.0320762	0.949641	104.381	-0.175606	0.85381	-0.09504	0.5733	none	none	none	none	none	none
ENSMUSG00000001794	Capns1	none	599.534	0.36615	0.130864	541.549	-0.257541	0.359656	577.537	0.13924	0.932376	1166.08	1.23141	6.91111e-17	517.017	0.589908	0.0863633	0.5268	2.207e-07	none	none	none	increasing	none	none
ENSMUSG00000027184	Caprin1	none	1962.21	-0.350503	0.0957999	2149.07	0.0582892	0.899293	1239.16	-0.271167	0.462359	536.927	-0.789527	1.11977e-05	522.116	-0.0234554	0.980441	-0.2558	0.04358	none	none	none	none	none	none
ENSMUSG00000030309	Caprin2	none	14.2135	-0.332296	NA	16.4518	-0.261643	0.915912	9.81113	-0.243526	0.991361	9.24306	-0.0304186	0.984477	7.22601	-1.5027	0.493749	-0.01717	0.9513	none	none	none	none	none	none
ENSMUSG00000039676	Capsl	none	15.935	0.333015	NA	19.2291	0.0361865	0.988862	5.68283	1.3478	0.720496	33.2598	0.70487	0.137155	NA	NA	NA	-0.2558	0.6014	none	none	none	none	none	none
ENSMUSG00000070372	Capza1	none	14.8259	-0.195727	NA	21.2803	0.12544	0.961488	24.098	0.306686	0.958938	20.4526	0.290979	0.707786	45.5902	0.0189244	0.991725	0.2373	0.1384	none	none	none	none	none	none
ENSMUSG00000015733	Capza2	none	2219.47	-0.234075	0.337968	3868.65	0.0256436	0.965216	1100.31	0.0763838	0.98703	1997.04	0.474867	0.00757241	2068.11	0.607428	0.0557202	-0.04621	0.7968	none	none	none	none	none	none
ENSMUSG00000028745	Capzb	none	2073.67	0.115809	0.692354	2926.27	0.134777	0.594269	1196.99	0.0282158	0.994132	1615.61	0.449034	0.00754657	1763.25	0.272896	0.524693	0.1469	0.2823	none	none	none	none	none	none
ENSMUSG00000056158	Car10	none	873.511	-0.26095	0.364822	149.778	-0.285455	0.734274	278.081	-0.0700887	0.991399	377.511	-0.422773	0.0478458	22.2873	-0.787217	0.575208	-0.5551	0.002548	none	none	none	none	none	none
ENSMUSG00000003273	Car11	none	441.127	0.0706458	0.895855	233.93	-0.118041	0.874378	101.396	0.42181	0.632818	155.866	-0.161715	0.703091	17.4772	-1.68313	0.131646	-0.4271	5.459e-05	none	none	none	none	none	none
ENSMUSG00000032373	Car12	none	107.68	-1.10539	0.00560644	303.828	0.762201	4.19322e-05	7.60744	1.57685	0.456096	77.6074	0.0870873	0.865177	7.5546	-1.3254	0.581685	0.4851	0.01026	decreasing	none	none	none	none	none
ENSMUSG00000038526	Car14	none	13.6589	0.689148	NA	NA	NA	NA	7.22905	0.0540556	0.995591	148.679	-0.458228	0.114812	4.6271	-0.38149	0.928623	0.4473	0.1529	none	none	none	none	none	none
ENSMUSG00000027562	Car2	none	169.953	0.0118604	0.99082	91.2722	-0.156658	0.879679	222.137	-0.111709	0.973802	1397.8	-0.709279	9.68349e-06	56.1282	-1.1146	0.11124	-0.2384	0.02993	none	none	none	none	none	none
ENSMUSG00000027559	Car3	none	NA	NA	NA	NA	NA	NA	NA	NA	NA	9.23842	-0.263086	0.828421	NA	NA	NA	NA	NA	none	none	none	none	none	none
ENSMUSG00000000805	Car4	none	128.759	0.207687	0.752409	174.612	-0.229038	0.672792	188.411	-0.575286	0.244431	52.589	-0.745046	0.0668324	10.4642	-2.26155	0.187195	-0.3607	0.004261	none	none	none	none	none	none
ENSMUSG00000031373	Car5b	none	NA	NA	NA	NA	NA	NA	NA	NA	NA	129.484	0.78533	0.00203637	NA	NA	NA	1.393	1.656e-13	none	none	none	none	none	increasing
ENSMUSG00000031883	Car7	none	66.061	0.0871233	NA	102.394	-0.164507	0.856321	220.301	-0.0114581	0.995591	9.93794	-0.139651	0.91334	NA	NA	NA	-0.4692	0.002231	none	none	none	none	none	none
ENSMUSG00000041261	Car8	none	11.0252	-0.208045	NA	NA	NA	NA	6758.83	-0.329714	0.368273	202.599	0.0404285	0.924052	73.3076	-2.35212	0.151865	0.3686	0.245	none	none	none	none	none	none
ENSMUSG00000037960	Card19	none	8.97388	1.05443	NA	3.491	-0.0314543	NA	7.2475	1.35568	0.659073	29.4949	1.18597	0.016321	82.6284	0.839334	0.164949	NA	NA	none	none	none	increasing	none	none
ENSMUSG00000041849	Card6	none	5.99864	-0.835613	NA	15.8907	0.594986	0.701943	NA	NA	NA	7.60544	1.0967	0.266541	44.0012	-0.653133	0.540897	0.174	0.7025	none	none	none	none	none	none
ENSMUSG00000026017	Carf	none	91.4084	0.0207114	NA	110.521	0.117339	0.907404	60.9826	-0.342574	0.884347	55.2418	0.137805	0.800873	11.7964	-0.369121	0.889155	0.07268	0.7669	none	none	none	none	none	none
ENSMUSG00000032185	Carm1	none	366.702	-0.000558791	0.999806	391.851	-0.0186949	0.982009	127.79	0.0493029	0.994132	129.64	0.118969	0.753945	43.1128	-0.262274	0.841589	-0.113	0.3671	none	none	none	none	none	none
ENSMUSG00000021338	Carmil1	none	41.2512	-0.0812052	NA	30.1137	0.0423414	0.984076	27.3819	-0.300502	0.957654	229.616	-0.686375	0.00285877	34.4191	0.114347	0.951876	NA	NA	none	none	none	none	none	none
ENSMUSG00000050357	Carmil2	none	138.539	0.0449234	0.962813	125.621	-0.0719761	0.948749	88.4563	0.0422141	0.994132	34.0121	-0.493374	0.33456	NA	NA	NA	NA	NA	none	none	none	none	none	none
ENSMUSG00000022211	Carmil3	none	57.9747	0.14672	NA	53.9342	-0.405995	0.58586	23.8834	0.627689	0.777081	26.7773	-0.282801	0.704702	7.36364	-2.45444	0.176193	NA	NA	none	none	none	none	none	none
ENSMUSG00000075289	Carns1	none	10.6947	0.398899	NA	5.46798	0.243822	NA	5.72319	-0.0229035	0.997323	NA	NA	NA	NA	NA	NA	0.9612	4.283e-08	none	none	none	none	none	none
ENSMUSG00000010755	Cars	none	301.983	0.11619	0.82866	257.51	-0.225057	0.613445	166.646	-0.000934608	0.998298	102.961	-0.54292	0.0514804	68.614	-0.0267968	0.987513	-0.3256	0.0105	none	none	none	none	none	none
ENSMUSG00000056228	Cars2	none	55.221	0.0246206	NA	54.662	-0.340219	0.695151	31.6639	-0.0224974	0.995591	29.2937	-0.0383269	0.966405	15.9354	-1.08893	0.495744	-0.2839	0.136	none	none	none	none	none	none
ENSMUSG00000021647	Cartpt	none	57.1564	0.109601	NA	8.50845	-2.27238	NA	19.8485	0.582125	0.846337	40.5575	0.124599	0.859724	NA	NA	NA	-1.113	0.05209	none	none	none	none	none	none
ENSMUSG00000078676	Casc3	none	363.111	-0.122169	0.786847	307.981	-0.117608	0.828962	170.554	0.0893356	0.98964	121.426	-0.394479	0.173804	98.3071	-0.0331206	0.982751	-0.1469	0.2606	none	none	none	none	none	none
ENSMUSG00000060227	Casc4	none	297.045	-0.270029	0.523152	461.505	-0.00608289	0.992694	491.178	-0.764038	0.676058	950.457	-0.0300711	0.943568	62.1989	-0.466175	0.663666	-0.1248	0.4089	none	none	none	none	none	none
ENSMUSG00000015189	Casd1	none	494.762	-0.251561	0.426587	697.538	0.118861	0.761104	393.506	-0.299967	0.768394	565.923	-0.47084	0.0334762	157.294	0.202853	0.79773	-0.1614	0.2401	none	none	none	none	none	none
ENSMUSG00000031012	Cask	none	806.004	-0.201867	0.505999	626.678	-0.125681	0.759062	300.698	-0.0552525	0.992723	388.603	0.211025	0.389782	171.324	-0.48306	0.365398	-0.06372	0.7004	none	none	none	none	none	none
ENSMUSG00000033597	Caskin1	none	459.732	0.0536125	0.937383	463.5	-0.35554	0.0903083	255.847	-0.0349888	0.994132	316.118	-1.42654	9.01931e-13	15.8568	-2.05498	0.0716083	-0.1224	0.5313	none	none	none	decreasing	none	none
ENSMUSG00000034471	Caskin2	none	14.2533	0.0847009	NA	NA	NA	NA	6.36402	0.979904	0.879134	103.419	-1.21016	1.13409e-06	NA	NA	NA	0.06537	0.8125	none	none	none	decreasing	none	none
ENSMUSG00000025888	Casp1	none	25.0439	0.194739	NA	20.4732	-0.855914	0.547711	NA	NA	NA	39.9218	0.548724	0.270137	148.95	0.402314	0.541357	1.416	1.173e-06	none	none	none	none	none	increasing
ENSMUSG00000025887	Casp12	none	9.10985	0.604451	NA	NA	NA	NA	NA	NA	NA	141.323	1.65469	1.06423e-13	6.14419	-0.561639	0.876027	1.66	2.784e-06	none	none	none	increasing	none	increasing
ENSMUSG00000029863	Casp2	none	17.6841	-0.0696568	NA	17.7585	0.334109	0.870105	12.5828	-0.122247	0.994132	15.5989	0.0384567	0.974918	22.63	0.035548	0.989164	0.04569	0.849	none	none	none	none	none	none
ENSMUSG00000031628	Casp3	none	54.4622	-0.0466946	NA	39.2781	0.300101	0.81233	49.0935	0.367531	0.853199	94.8181	0.82801	0.00422969	84.6444	-0.413642	0.605864	0.5626	0.01507	none	none	none	none	none	none
ENSMUSG00000025076	Casp7	none	10.0623	-0.0202283	NA	5.38991	-0.0531797	NA	NA	NA	NA	32.1197	0.432846	0.414416	33.8816	0.875439	0.397068	0.9612	0.001685	none	none	none	none	none	none
ENSMUSG00000028282	Casp8ap2	none	76.6686	-0.237727	NA	96.5256	0.161044	0.858949	69.1357	-0.410631	0.718165	80.3026	-0.111947	0.820634	50.7887	0.837072	0.289532	-0.02681	0.9279	none	none	none	none	none	none
ENSMUSG00000028914	Casp9	none	35.3393	0.741446	NA	27.1143	0.11176	0.959607	39.7963	-0.219234	0.973539	46.652	0.0832269	0.90044	39.8375	0.314125	0.824598	-0.193	0.1661	none	none	none	none	none	none
ENSMUSG00000027861	Casq2	none	NA	NA	NA	NA	NA	NA	464.822	-0.444572	0.285433	9.31412	0.865347	0.351919	7.13336	-3.79971	0.0430937	-0.1207	0.8059	none	none	none	none	decreasing+neuronal	none
ENSMUSG00000051980	Casr	none	NA	NA	NA	NA	NA	NA	NA	NA	NA	14.4317	-0.092507	0.938138	NA	NA	NA	NA	NA	none	none	none	none	none	none
ENSMUSG00000021585	Cast	none	106.544	-0.286591	0.671922	32.8661	-0.533452	0.680644	288.311	-0.205073	0.85529	71.7112	0.597398	0.0635528	170.71	-0.0734035	0.936982	0.2848	0.2212	none	none	none	none	none	none
ENSMUSG00000015944	Castor2	none	262.527	0.173373	0.7247	198.559	-0.551955	0.0304611	144.739	0.295934	0.768394	158.149	0.208173	0.555488	28.4513	-1.07257	0.274129	NA	NA	none	none	none	none	none	none
ENSMUSG00000027187	Cat	none	211.135	0.0723296	0.91819	378.006	0.704445	3.927e-05	209.958	0.307987	0.688347	683.346	-0.131318	0.601194	340.959	0.0770175	0.928557	0.5231	3.054e-05	none	none	none	none	none	none
ENSMUSG00000033486	Catsper2	none	NA	NA	NA	NA	NA	NA	NA	NA	NA	14.7118	0.881406	0.206051	NA	NA	NA	0.4807	0.1163	none	none	none	none	none	none
ENSMUSG00000091476	Catspere2	none	6.69841	0.147017	NA	8.63288	1.82528	NA	NA	NA	NA	8.90377	0.525094	0.638621	NA	NA	NA	NA	NA	none	none	none	none	none	none
ENSMUSG00000007655	Cav1	none	15.6527	-0.132626	NA	NA	NA	NA	NA	NA	NA	116.771	3.52984	2.62675e-33	5.95774	-0.869944	0.78475	0.8633	1.841e-08	none	none	none	increasing	none	none
ENSMUSG00000000058	Cav2	none	186.101	-0.0250463	0.978261	40.8322	-0.939101	0.295084	33.26	0.459269	0.830808	893.198	1.93847	4.64507e-29	32.5824	-0.484414	0.711065	1.005	1.942e-21	none	none	none	increasing	none	increasing
ENSMUSG00000004044	Cavin1	none	47.6385	0.280616	NA	5.79945	3.28617	NA	10.3649	1.02087	0.732369	94.4581	1.67364	1.11736e-10	6.52392	-1.27656	0.618057	NA	NA	none	none	none	increasing	none	none
ENSMUSG00000045954	Cavin2	none	5.56094	-0.249117	NA	NA	NA	NA	5.86652	0.6326	0.957654	5.37794	-1.09248	0.382024	NA	NA	NA	NA	NA	none	none	none	none	none	none
ENSMUSG00000037060	Cavin3	none	50.7487	-1.04457	NA	9.79467	0.0153541	NA	16.2366	-0.130024	0.994132	293.749	0.558984	0.0160879	NA	NA	NA	NA	NA	none	none	none	none	none	none
ENSMUSG00000035640	Cbarp	none	1085.25	0.218448	0.415448	708.156	-0.0694269	0.909682	327.295	0.271565	0.768394	289.928	-0.17029	0.538292	27.3611	-1.42333	0.130842	NA	NA	none	none	none	none	none	none
ENSMUSG00000038533	Cbfa2t2	none	335.51	-0.117492	0.801452	311.747	-0.0204205	0.97976	126.367	-0.0252391	0.994132	98.0989	-0.24722	0.507576	34.1388	-0.470462	0.70564	-0.1237	0.3411	none	none	none	none	none	none
ENSMUSG00000006362	Cbfa2t3	none	68.8901	0.788829	NA	76.9483	0.224363	0.87302	33.8046	-0.28565	0.957654	14.8154	-1.33025	0.0489643	18.3281	-0.801629	0.601031	-0.6029	0.0001022	none	none	none	decreasing	none	none
ENSMUSG00000031885	Cbfb	none	40.833	0.282985	NA	40.4745	0.222857	0.870677	28.2395	0.143569	0.992723	163.529	0.281628	0.377677	225.437	0.029966	0.980441	0.5777	3.811e-05	none	none	none	none	none	none
ENSMUSG00000034342	Cbl	none	287.227	-0.122479	0.810999	350.985	0.116562	0.84289	98.8562	-0.195217	0.950864	174.585	-0.339979	0.19682	265.558	-0.175712	0.797882	0.08939	0.7095	none	none	none	none	none	none
ENSMUSG00000022637	Cblb	none	129.48	-0.11703	0.878299	249.447	0.266437	0.481968	65.1356	0.0545426	0.994132	46.0254	-0.535191	0.18932	32.6914	-0.105214	0.956602	-0.06327	0.7723	none	none	none	none	none	none
ENSMUSG00000020659	Cbll1	none	191.115	-0.22594	0.681541	231.904	-0.0316701	0.972693	129.286	0.0116062	0.995591	115.379	-0.368664	0.218256	60.7331	0.311578	0.771627	-0.1073	0.5458	none	none	none	none	none	none
ENSMUSG00000031654	Cbln1	none	49.2904	0.402992	NA	18.4378	-1.32031	0.16473	993.636	-0.201011	0.825377	60.6526	-0.0562209	0.927649	17.7834	-0.541514	0.79181	0.2923	0.615	none	none	none	none	none	none
ENSMUSG00000024647	Cbln2	none	224.302	-0.348493	0.474038	41.0185	-0.0777253	0.975511	38.0601	-0.470253	0.840397	78.2216	-0.433642	0.243961	6.7323	-0.480184	0.888741	-0.746	0.006159	none	none	none	none	none	none
ENSMUSG00000067578	Cbln4	none	170.029	0.225262	0.688113	43.2843	-0.449293	0.755814	53.2205	0.0989427	0.992723	62.3454	-0.19539	0.672583	6.00044	-0.908746	0.763666	-0.1615	0.6323	none	none	none	none	none	none
ENSMUSG00000051483	Cbr1	none	443.182	0.200747	0.575398	442.027	-0.180545	0.694223	242.006	0.0431587	0.994132	185.557	-0.405314	0.116718	94.8322	-0.113549	0.921222	-0.0807	0.6517	none	none	none	none	none	none
ENSMUSG00000022947	Cbr3	none	67.2486	0.185765	NA	65.5937	-0.163378	0.899293	6.36761	0.674733	0.9512	111.054	-0.448413	0.152604	22.7064	0.527484	0.74286	0.01341	0.9735	none	none	none	none	none	none
ENSMUSG00000031641	Cbr4	none	98.7861	0.0283403	0.980065	151.304	0.0942215	0.917849	59.5094	0.426161	0.761875	101.384	0.157764	0.722044	26.8645	1.26215	0.218297	0.3349	0.08274	none	none	none	none	none	none
ENSMUSG00000024039	Cbs	none	22.3712	0.557387	NA	2.95224	0.35724	NA	5.53409	-0.167203	0.994132	313.617	-0.864438	1.75871e-05	10.5248	-1.73629	0.387384	-0.1813	0.2576	none	none	none	none	none	none
ENSMUSG00000024878	Cbwd1	none	81.1212	-0.281486	NA	94.0005	0.175185	0.845947	73.1991	0.0968681	0.991399	90.7951	0.0312784	0.954466	14.0577	1.05399	0.53435	-0.04184	0.8839	none	none	none	none	none	none
ENSMUSG00000018666	Cbx1	none	237.361	-0.637063	0.0530957	241.823	-0.248612	0.518109	182.099	-0.37496	0.541003	218.147	-0.751926	0.000385507	109.415	-0.22189	0.802288	-0.09116	0.6491	none	none	none	none	none	none
ENSMUSG00000029836	Cbx3	none	89.5324	-0.0659317	NA	132.82	-0.445072	0.424689	72.0253	-0.204361	0.957654	115.452	-0.109572	0.785943	40.0611	-0.0793252	0.968982	-0.06549	0.7452	none	none	none	none	none	none
ENSMUSG00000039989	Cbx4	none	346.149	0.113292	0.811964	349.355	-0.0283478	0.970917	172.489	-0.145042	0.962425	72.1237	-0.0913114	0.860729	33.317	-0.756842	0.481693	0.03349	0.9009	none	none	none	none	none	none
ENSMUSG00000009575	Cbx5	none	685.113	-0.201231	0.507703	1039.03	-0.0865064	0.904773	555.55	-0.158949	0.902699	922.698	-0.0394963	0.890487	103.681	-0.26519	0.757683	-0.1296	0.3951	none	none	none	none	none	none
ENSMUSG00000089715	Cbx6	none	301.158	0.0237158	0.97547	294.775	-0.0892706	0.900009	129.796	-0.0259761	0.994132	75.0149	-0.194683	0.650519	18.2501	-0.908629	0.531017	-0.2229	0.1451	none	none	none	none	none	none
ENSMUSG00000053411	Cbx7	none	109.228	0.305029	0.643403	87.1269	-0.604013	0.155998	73.7516	-0.11916	0.990737	68.9306	-0.540635	0.116638	18.3663	-0.145424	0.953011	-0.05586	0.712	none	none	none	none	none	none
ENSMUSG00000025578	Cbx8	none	75.7452	-0.23846	NA	44.2478	-0.31564	0.76823	48.5988	-0.207054	0.969149	12.663	-0.857789	0.260714	13.1203	-1.21076	0.445566	0.2069	0.6296	none	none	none	none	none	none
ENSMUSG00000022428	Cby1	none	155.6	0.0367869	0.967697	109.435	-0.447492	0.269274	87.6173	-0.287808	0.868619	154.578	0.0417091	0.923289	22.8514	0.355906	0.841589	-0.1432	0.3685	none	none	none	none	none	none
ENSMUSG00000036686	Cc2d1a	none	306.989	0.0468681	0.946876	235.779	-0.265354	0.488968	127.431	0.22802	0.909399	121.428	-0.313047	0.333954	43.1022	0.0504965	0.981744	0.01936	0.937	none	none	none	none	none	none
ENSMUSG00000028582	Cc2d1b	none	59.2273	0.434557	NA	37.6761	0.104199	0.954654	37.5491	0.251056	0.962425	71.8612	-0.11937	0.823525	74.7312	-0.324844	0.745787	0.3057	0.04441	none	none	none	none	none	none
ENSMUSG00000039765	Cc2d2a	none	109.96	0.228178	0.7667	119.09	0.0208519	0.984651	62.5829	0.375244	0.799977	68.492	-1.04468	0.000393283	14.1078	-1.6242	0.239089	-0.0177	0.9407	none	none	none	decreasing	none	none
ENSMUSG00000020074	Ccar1	none	429.767	-0.541148	0.0566868	445.545	-0.106264	0.838155	336.004	-0.0371939	0.994132	300.352	-0.363836	0.170607	227.311	0.138036	0.852715	0.1478	0.347	none	none	none	none	none	none
ENSMUSG00000033712	Ccar2	none	426.189	0.17288	0.670224	396.731	0.152723	0.74461	237.62	0.0766966	0.98964	123.055	-0.0257125	0.958805	50.7886	-0.34642	0.759437	NA	NA	none	none	none	none	none	none
ENSMUSG00000046318	Ccbe1	none	33.5614	-0.21616	NA	123.627	-0.661367	0.0344217	15.7375	-0.448744	0.948922	21.9731	-0.431584	0.559684	NA	NA	NA	-0.4574	0.003778	none	none	none	none	none	none
ENSMUSG00000020930	Ccdc103	none	10.1496	-0.457795	NA	12.5397	0.25765	0.927249	4.1511	0.393315	0.991361	6.24571	-0.700409	0.574536	NA	NA	NA	-0.08869	0.8729	none	none	none	none	none	none
ENSMUSG00000035228	Ccdc106	none	96.5791	0.55204	0.321023	118.4	-0.0339186	0.9775	27.6861	-0.088771	0.994132	29.1757	-0.00185146	0.997672	7.1249	0.405621	0.907162	-0.03412	0.8787	none	none	none	none	none	none
ENSMUSG00000028461	Ccdc107	none	165.362	-0.0324904	0.971402	126.164	-0.267835	0.634708	237.86	-0.214244	0.846278	200.116	0.0571732	0.883006	72.7279	0.346595	0.72211	-0.1614	0.4636	none	none	none	none	none	none
ENSMUSG00000071104	Ccdc110	none	NA	NA	NA	3.44209	-0.542325	NA	NA	NA	NA	NA	NA	NA	NA	NA	NA	0.6175	NA	none	none	none	none	none	none
ENSMUSG00000071855	Ccdc112	none	84.7183	-0.286328	NA	157.224	0.0467932	0.968549	29.6834	-0.642613	0.659073	38.1001	0.0787934	0.908986	21.3882	0.605488	0.704145	-0.07551	0.7452	none	none	none	none	none	none
ENSMUSG00000036598	Ccdc113	none	35.4846	0.167032	NA	6.80577	0.482597	NA	6.12504	1.24015	0.768394	17.5206	-0.0148497	0.988927	NA	NA	NA	-0.1237	0.8244	none	none	none	none	none	none
ENSMUSG00000042111	Ccdc115	none	24.6944	0.818335	NA	18.8285	0.208991	0.929421	15.9314	0.232284	0.988891	18.4086	-0.0440348	0.971511	23.0321	0.665063	0.675232	0.159	0.4049	none	none	none	none	none	none
ENSMUSG00000022768	Ccdc116	none	NA	NA	NA	NA	NA	NA	NA	NA	NA	NA	NA	NA	NA	NA	NA	0.6052	0.07255	none	none	none	none	none	none
ENSMUSG00000020482	Ccdc117	none	31.6557	0.282417	NA	30.5642	-0.290559	0.841356	33.0764	-0.490636	0.815846	42.908	-0.521642	0.285006	42.2191	-0.36649	0.76387	-0.0279	0.924	none	none	none	none	none	none
ENSMUSG00000019659	Ccdc12	none	75.0846	0.443473	NA	60.1178	-0.20019	0.873805	48.8111	-0.0122586	0.997183	66.061	0.160862	0.737805	53.3313	-0.0345283	0.985856	0.09462	0.6179	none	none	none	none	none	none
ENSMUSG00000031150	Ccdc120	none	34.6219	0.294459	NA	20.7223	0.159355	0.947779	18.9037	0.149176	0.993124	6.58385	-1.15576	0.311513	NA	NA	NA	-0.1415	0.5408	none	none	none	none	none	none
ENSMUSG00000034795	Ccdc122	none	10.2567	-0.384486	NA	15.8523	0.677988	0.648934	12.6206	-0.0138528	0.997323	100.005	1.19924	3.59899e-05	34.5449	2.69774	0.000863729	1.325	1.37e-05	none	none	none	increasing	increasing	increasing
ENSMUSG00000007721	Ccdc124	none	241.371	0.184845	0.706725	195.029	-0.189685	0.719314	153.105	-0.302346	0.749754	193.29	0.0726113	0.84648	73.4635	0.136132	0.911306	-0.1771	0.4715	none	none	none	none	none	none
ENSMUSG00000050786	Ccdc126	none	66.0235	-0.0851779	NA	79.9095	-0.18908	0.851002	127.209	-0.207171	0.939405	106.56	-0.330188	0.295202	22.7704	0.224132	0.909864	0.1583	0.574	none	none	none	none	none	none
ENSMUSG00000021578	Ccdc127	none	272.554	-0.267079	0.554378	300.557	-0.0477011	0.949761	264.035	-0.161204	0.939043	366.566	-0.336761	0.105708	85.6133	0.31638	0.727781	-0.4129	5.086e-05	none	none	none	none	none	none
ENSMUSG00000079235	Ccdc13	none	9.4693	1.7538	NA	5.8065	0.576132	NA	NA	NA	NA	16.04	-0.724745	0.323617	NA	NA	NA	0.05745	0.8777	none	none	none	none	none	none
ENSMUSG00000004994	Ccdc130	none	61.9199	-0.0111746	NA	68.9435	0.242955	0.789124	20.9392	0.283519	0.977729	25.1571	-0.101123	0.902644	22.0695	-0.460012	0.782343	-0.09137	0.7087	none	none	none	none	none	none
ENSMUSG00000068114	Ccdc134	none	15.8373	-0.185116	NA	12.0316	-0.432639	NA	6.26009	-0.471666	0.977956	38.0987	0.283412	0.615111	12.1541	-0.318415	0.907162	0.2917	0.1688	none	none	none	none	none	none
ENSMUSG00000029769	Ccdc136	none	308.648	0.264858	0.487048	90.3613	-0.67014	0.110695	207.35	0.186627	0.924628	109.569	0.412598	0.163679	12.4047	-1.4076	0.383346	0.1135	0.6249	none	none	none	none	none	none
ENSMUSG00000049957	Ccdc137	none	54.278	-0.428016	NA	74.7188	0.0885685	0.945399	35.9762	-0.418271	0.861796	80.2146	-0.157797	0.718266	13.5224	-0.0460949	0.989301	-0.08321	0.6698	none	none	none	none	none	none
ENSMUSG00000038010	Ccdc138	none	17.8983	-0.575869	NA	28.5171	-0.337859	0.80425	9.33682	-0.449563	0.964767	22.1843	-0.184491	0.817606	NA	NA	NA	0.02782	0.9552	none	none	none	none	none	none
ENSMUSG00000022833	Ccdc14	none	24.9464	0.0721918	NA	26.0947	0.0551451	0.980844	17.0602	0.317366	0.970586	11.0695	-0.18559	0.878543	11.0954	-0.754514	0.740968	0.1881	0.571	none	none	none	none	none	none
ENSMUSG00000044033	Ccdc141	none	15.2254	-0.508583	NA	NA	NA	NA	9.57959	0.352294	0.980148	104.772	-0.156006	0.708689	NA	NA	NA	0.5314	0.00158	none	none	none	none	none	none
ENSMUSG00000036641	Ccdc148	none	26.4152	0.648337	NA	32.7609	0.0657018	0.976385	18.543	0.282654	0.979024	26.3276	0.685513	0.218256	NA	NA	NA	-0.08454	0.7337	none	none	none	none	none	none
ENSMUSG00000045790	Ccdc149	none	216.62	0.137584	0.805064	199.353	-0.157984	0.789501	82.1604	0.0922279	0.992723	66.0737	0.256159	0.58002	14.0972	-2.40453	0.0691135	-0.1804	0.1262	none	none	none	none	none	none
ENSMUSG00000034303	Ccdc15	none	12.6677	0.468985	NA	10.4168	-0.742502	NA	19.7161	0.0652754	0.994132	14.6499	-0.413787	0.621382	14.6031	-0.375718	0.868741	-0.3011	0.518	none	none	none	none	none	none
ENSMUSG00000039632	Ccdc151	none	25.0534	-0.684719	NA	27.2158	-0.751796	0.427565	5.32437	0.0627825	0.995591	8.66352	-0.840993	0.390186	NA	NA	NA	-0.2618	0.3995	none	none	none	none	none	none
ENSMUSG00000038292	Ccdc155	none	12.2403	1.59187	NA	10.1836	-0.0940655	NA	NA	NA	NA	NA	NA	NA	NA	NA	NA	-0.1663	0.6495	none	none	none	none	none	none
ENSMUSG00000051427	Ccdc157	none	41.388	0.610901	NA	13.1274	-0.0511786	0.987204	16.1426	0.536087	0.906835	64.6737	0.221972	0.616448	9.21827	0.0698565	0.986795	0.2494	0.0968	none	none	none	none	none	none
ENSMUSG00000050050	Ccdc158	none	NA	NA	NA	7.64353	0.179339	NA	NA	NA	NA	11.0315	0.918013	0.26213	NA	NA	NA	0.08846	0.914	none	none	none	none	none	none
ENSMUSG00000006241	Ccdc159	none	16.8296	0.0941811	NA	11.2872	-0.335611	NA	8.40722	-0.286787	0.991361	9.1661	0.220848	0.8628	3.66272	-2.30764	0.449409	-0.2177	0.1722	none	none	none	none	none	none
ENSMUSG00000073207	Ccdc160	none	22.75	-0.743865	NA	21.6117	-0.251574	0.906324	17.9527	-0.00918639	0.997323	5.96714	0.740895	0.556546	NA	NA	NA	-0.394	0.3826	none	none	none	none	none	none
ENSMUSG00000028689	Ccdc163	none	NA	NA	NA	NA	NA	NA	NA	NA	NA	4.8083	-0.653532	0.662894	6.87773	0.833645	0.78793	-0.1178	0.7622	none	none	none	none	none	none
ENSMUSG00000098176	Ccdc166	none	19.1334	-0.204392	NA	11.1444	-0.407843	NA	9.68542	-0.299495	0.98964	7.29659	-0.309426	0.818251	6.27729	0.62455	0.855668	NA	NA	none	none	none	none	none	none
ENSMUSG00000024018	Ccdc167	none	29.1757	0.185276	NA	31.664	-0.822614	0.240229	31.1133	-0.0273976	0.995591	77.5869	0.713102	0.0358463	22.4553	0.341447	0.84942	NA	NA	none	none	none	none	none	none
ENSMUSG00000034035	Ccdc17	none	4.78324	0.844434	NA	NA	NA	NA	NA	NA	NA	7.60799	0.974669	0.375066	6.88503	-0.142847	0.976277	0.3683	0.2763	none	none	none	none	none	none
ENSMUSG00000052407	Ccdc171	none	16.3331	-0.321017	NA	14.4789	0.222292	0.935363	5.86248	0.183847	0.994132	13.4003	-0.176258	0.868895	5.08711	-0.856877	0.8027	NA	NA	none	none	none	none	none	none
ENSMUSG00000070883	Ccdc173	none	7.57374	-0.0545645	NA	11.5602	-0.108487	NA	9.07304	0.592182	0.947762	14.5902	-0.594694	0.432153	NA	NA	NA	NA	NA	none	none	none	none	none	none
ENSMUSG00000034083	Ccdc174	none	110.929	-0.124106	0.880988	106.501	0.243275	0.748442	127.497	0.125955	0.977337	60.0446	-0.0313341	0.96087	51.5082	-0.189661	0.8897	NA	NA	none	none	none	none	none	none
ENSMUSG00000062961	Ccdc177	none	36.5072	-0.069983	NA	32.8355	-0.105207	0.957396	8.03873	0.491059	0.9661	8.65414	-0.401104	0.728505	NA	NA	NA	NA	NA	none	none	none	none	none	none
ENSMUSG00000056531	Ccdc18	none	5.28858	-0.135878	NA	3.2224	1.26788	NA	3.77412	-0.156255	0.994132	62.4599	-1.3306	0.000139899	NA	NA	NA	-0.2583	0.6802	none	none	none	decreasing	none	none
ENSMUSG00000026578	Ccdc181	none	160.658	-0.298192	0.561263	137.11	0.0220857	0.984076	87.5287	0.217924	0.947673	109.753	-0.213889	0.553253	28.3401	-0.071597	0.976621	NA	NA	none	none	none	none	none	none
ENSMUSG00000029875	Ccdc184	none	91.1452	0.0394585	NA	36.8709	0.0796533	0.968072	130.848	0.0391684	0.994132	30.7792	0.593507	0.286074	4.03569	1.11985	0.799173	NA	NA	none	none	none	none	none	none
ENSMUSG00000035173	Ccdc186	none	505.61	-0.28415	0.396256	470.885	-0.0937745	0.909308	762.831	-0.31737	0.4354	399.197	-0.179378	0.501242	158.221	0.0473061	0.96708	NA	NA	none	none	none	none	none	none
ENSMUSG00000057176	Ccdc189	none	13.2129	0.115304	NA	9.42863	0.217363	NA	11.1491	-0.127323	0.994132	26.4575	-0.33574	0.602959	NA	NA	NA	NA	NA	none	none	none	none	none	none
ENSMUSG00000070532	Ccdc190	none	11.3854	0.715671	NA	NA	NA	NA	12.6808	0.477037	0.952258	790.21	0.586461	0.00598326	5.82573	0.284499	0.942858	NA	NA	none	none	none	none	none	none
ENSMUSG00000022701	Ccdc191	none	19.6676	0.0575174	NA	14.9578	-0.0719491	0.980844	11.5128	0.422329	0.964767	14.255	-0.636904	0.410136	8.86612	-0.658735	0.8027	NA	NA	none	none	none	none	none	none
ENSMUSG00000022035	Ccdc25	none	298.332	-0.255466	0.532211	394.595	0.00967948	0.990609	229.324	-0.189353	0.924885	156.125	0.116487	0.754441	54.3498	0.275916	0.828936	-0.2278	0.08607	none	none	none	none	none	none
ENSMUSG00000059554	Ccdc28a	none	114.634	-0.217417	0.751525	114.965	-0.418407	0.36189	112.56	0.101834	0.989253	55.2216	-0.107314	0.847325	13.5269	0.290774	0.909126	-0.08527	0.7596	none	none	none	none	none	none
ENSMUSG00000028795	Ccdc28b	none	36.6418	0.136737	NA	41.8051	-0.451415	0.615921	49.3452	-0.358682	0.908037	44.2316	-1.1118	0.00288573	21.8335	-0.178589	0.933629	-0.09306	0.6292	none	none	none	decreasing	none	none
ENSMUSG00000026676	Ccdc3	none	83.9987	-0.109068	NA	27.801	-0.670559	0.489509	3.75344	2.26151	0.516647	224.406	1.23429	5.42739e-10	NA	NA	NA	1.36	1.806e-12	none	none	none	increasing	none	increasing
ENSMUSG00000028637	Ccdc30	none	51.3918	0.0785161	NA	53.4069	0.331087	0.70226	36.5834	0.0338512	0.994132	30.1468	0.25286	0.698467	NA	NA	NA	0.05858	0.8388	none	none	none	none	none	none
ENSMUSG00000039983	Ccdc32	none	270.05	-0.198992	0.875633	372.9	-0.00671489	0.992332	190.787	0.022007	0.994132	172.559	-0.0724006	0.856013	43.7855	0.780886	0.396646	-0.1976	0.1325	none	none	none	none	none	none
ENSMUSG00000027160	Ccdc34	none	13.2899	0.0491905	NA	14.4353	-0.171833	0.955215	10.9378	-0.281857	0.988481	49.2893	-0.388446	0.367228	15.8741	0.909274	0.581975	-0.03906	0.8969	none	none	none	none	none	none
ENSMUSG00000027676	Ccdc39	none	112.961	-0.312434	0.620757	140.983	-0.211845	0.759835	25.4976	0.375813	0.939405	51.6775	-0.842599	0.0209517	NA	NA	NA	0.03975	0.8807	none	none	none	none	none	none
ENSMUSG00000045915	Ccdc42	none	12.5222	-1.64349	NA	9.86174	-0.149947	NA	NA	NA	NA	5.04667	-0.734682	0.602457	NA	NA	NA	-0.5232	NA	none	none	none	none	none	none
ENSMUSG00000020925	Ccdc43	none	62.9385	-0.144313	NA	94.1122	0.0457869	0.971648	40.2927	-0.267364	0.956332	75.054	0.373848	0.313409	32.3033	0.313215	0.832484	0.0247	0.9244	none	none	none	none	none	none
ENSMUSG00000078622	Ccdc47	none	963.416	-0.283369	0.257908	1111.49	0.126243	0.716637	634.144	-0.0290784	0.994132	1643.83	0.313188	0.149501	422.572	-0.202403	0.71221	0.07193	0.6471	none	none	none	none	none	none
ENSMUSG00000038127	Ccdc50	none	146.386	-0.876842	0.011789	104.731	-0.515838	0.212411	307.441	-0.429423	0.276635	255.265	0.340857	0.180072	376.307	0.245857	0.652965	0.2715	0.02857	none	none	none	none	none	none
ENSMUSG00000025645	Ccdc51	none	35.855	-0.194516	NA	34.1564	-0.237662	0.876583	17.0883	-0.141339	0.994132	15.1735	-0.132862	0.90028	6.18517	0.213982	0.960332	0.4123	0.1121	none	none	none	none	none	none
ENSMUSG00000048445	Ccdc57	none	17.588	0.483083	NA	14.7725	-0.0147655	0.9951	4.6687	-1.59946	0.703411	6.72547	-0.955674	0.40073	NA	NA	NA	0.05997	0.8166	none	none	none	none	none	none
ENSMUSG00000075229	Ccdc58	none	25.7148	-0.625866	NA	39.1355	-0.221743	0.88127	31.131	-0.387207	0.916885	43.9505	-0.048662	0.944203	16.5891	1.78663	0.154816	0.422	0.08496	none	none	none	none	none	none
ENSMUSG00000019897	Ccdc59	none	166.394	-0.256201	0.640615	179.551	0.210794	0.703341	112.684	-0.283526	0.825377	114.343	-0.206674	0.548849	45.7201	0.238094	0.859951	0.1344	0.5021	none	none	none	none	none	none
ENSMUSG00000048701	Ccdc6	none	257.686	0.0242132	0.978261	301.406	0.0110632	0.989562	299.988	-0.144942	0.977337	371.043	0.17619	0.636876	255.214	-0.244599	0.790984	0.007045	0.9734	none	none	none	none	none	none
ENSMUSG00000074358	Ccdc61	none	31.0913	0.22894	NA	19.613	-0.301289	0.880606	14.2051	-0.469222	0.943961	17.7594	-0.0181746	0.986476	15.4709	-0.187037	0.940292	0.1482	0.6846	none	none	none	none	none	none
ENSMUSG00000003354	Ccdc65	none	84.3104	0.0176261	NA	41.4375	-0.433973	0.653542	35.9276	0.548788	0.825377	14.3829	-0.51227	0.523093	NA	NA	NA	-0.4033	0.2332	none	none	none	none	none	none
ENSMUSG00000046753	Ccdc66	none	102.159	-0.53236	0.339121	137.898	0.167659	0.837815	88.3212	0.219822	0.940643	114.478	-0.598818	0.0298701	30.7598	0.551568	0.686225	-0.1975	0.4091	none	none	none	none	none	none
ENSMUSG00000049305	Ccdc71	none	172.705	-0.0092374	0.993357	192.98	-0.184779	0.723238	96.4386	0.132779	0.977956	93.0474	-0.0521797	0.916818	46.1283	0.627398	0.516339	0.02331	0.9109	none	none	none	none	none	none
ENSMUSG00000090946	Ccdc71l	none	21.3887	-0.36193	NA	58.4008	0.412464	0.660433	7.97662	0.516508	0.964767	19.0977	0.52992	0.430646	10.8707	0.248327	0.93453	NA	NA	none	none	none	none	none	none
ENSMUSG00000045106	Ccdc73	none	NA	NA	NA	NA	NA	NA	NA	NA	NA	30.7617	0.270582	0.667623	NA	NA	NA	NA	NA	none	none	none	none	none	none
ENSMUSG00000041617	Ccdc74a	none	39.1694	0.265625	NA	30.9004	-0.317995	0.827037	43.237	-0.155971	0.985989	92.4358	1.05923	4.05117e-05	NA	NA	NA	0.2164	0.2746	none	none	none	increasing	none	none
ENSMUSG00000030177	Ccdc77	none	11.3065	0.43332	NA	13.2835	0.733811	0.653757	14.0684	-0.287431	0.980148	8.96242	0.868416	0.359929	8.8706	-0.636855	0.826081	0.06686	0.8519	none	none	none	none	none	none
ENSMUSG00000022665	Ccdc80	none	67.9871	-0.15813	NA	NA	NA	NA	9.47978	-0.159175	0.994132	160.748	0.307869	0.332679	NA	NA	NA	1.088	3.611e-06	none	none	none	none	none	increasing
ENSMUSG00000079084	Ccdc82	none	59.404	-0.610361	NA	66.4861	-0.450301	0.474797	94.1443	-0.258903	0.908037	38.6666	-0.60312	0.175119	44.3568	0.633651	0.523352	0.0821	0.7265	none	none	none	none	none	none
ENSMUSG00000043923	Ccdc84	none	4.82186	0.465707	NA	6.68928	0.572917	NA	4.19416	-0.818784	0.950864	4.4655	-1.66853	0.219624	7.78881	0.619098	0.836447	0.007555	0.9797	none	none	none	none	none	none
ENSMUSG00000032878	Ccdc85a	none	220.919	-0.0137807	0.987879	242.03	-0.0582366	0.950231	147.751	-0.120622	0.979024	246.047	-0.013972	0.974125	11.7296	-2.2506	0.0994031	-0.08822	0.5563	none	none	none	none	none	none
ENSMUSG00000095098	Ccdc85b	none	107.108	0.182875	0.822527	112.955	-0.347502	0.573678	68.2366	-0.154213	0.979168	85.6707	-0.121189	0.789065	13.6892	0.501403	0.821801	-0.02235	0.9202	none	none	none	none	none	none
ENSMUSG00000084883	Ccdc85c	none	57.9359	0.482412	NA	36.9153	0.0117291	0.994613	135.822	-0.263369	0.862867	60.4391	-0.645444	0.0816287	14.7295	-0.939769	0.571381	-0.1977	0.512	none	none	none	none	none	none
ENSMUSG00000024732	Ccdc86	none	42.8455	-0.378179	NA	40.8304	0.338127	0.759062	31.0723	0.115099	0.994132	53.6229	0.0844772	0.885611	93.0773	1.13589	0.0265428	0.27	0.2172	none	none	none	none	increasing	none
ENSMUSG00000067872	Ccdc87	none	12.0075	-0.476455	NA	8.83281	0.0249647	NA	NA	NA	NA	5.18142	-0.455085	0.760731	NA	NA	NA	-0.4427	0.2556	none	none	none	none	none	none
ENSMUSG00000032740	Ccdc88a	none	680.826	-0.510292	0.0143283	958.396	0.485711	0.028293	681.815	-0.113439	0.958938	1355.52	-0.330726	0.190285	182.187	0.512008	0.343758	0.05596	0.7604	none	none	none	none	none	none
ENSMUSG00000047810	Ccdc88b	none	5.86251	2.59851	NA	5.18621	0.68872	NA	NA	NA	NA	NA	NA	NA	51.2401	0.0859329	0.960586	1.38	3.16e-10	none	none	none	none	none	increasing
ENSMUSG00000021182	Ccdc88c	none	121.879	0.152359	0.84253	172.163	0.838836	0.000522872	53.678	0.0775342	0.994132	109.882	0.383169	0.390969	8.34831	-1.84788	0.344748	-0.09397	0.6754	none	none	none	none	none	none
ENSMUSG00000044362	Ccdc89	none	NA	NA	NA	NA	NA	NA	6.56033	-0.506739	0.971512	10.8205	0.225238	0.855351	NA	NA	NA	0.7032	0.2358	none	none	none	none	none	none
ENSMUSG00000041375	Ccdc9	none	132.21	0.158526	0.819279	100.412	-0.058146	0.963389	60.3666	-0.101135	0.992723	39.0544	-0.348265	0.506732	42.6033	-0.0919456	0.958288	-0.09122	0.626	none	none	none	none	none	none
ENSMUSG00000030613	Ccdc90b	none	59.9662	-0.547905	NA	64.3263	-0.110414	0.936515	112.58	0.183099	0.953126	299.741	0.0955751	0.795512	80.472	0.278852	0.790984	0.3289	0.07159	none	none	none	none	none	none
ENSMUSG00000030301	Ccdc91	none	131.318	0.0216901	0.983813	122.854	-0.136408	0.876795	182.285	-0.143612	0.957654	135.612	0.0746807	0.854847	39.7241	-0.609854	0.582478	-0.155	0.307	none	none	none	none	none	none
ENSMUSG00000037979	Ccdc92	none	300.193	0.0869166	0.879992	211.068	-0.335082	0.392718	362.75	-0.144289	0.9512	93.5693	-0.249856	0.492088	16.3477	-1.95526	0.0807552	-0.3069	0.03133	none	none	none	none	none	none
ENSMUSG00000069814	Ccdc92b	none	68.433	0.0682495	NA	48.937	-0.463179	0.530066	46.5617	0.362501	0.88643	16.673	0.328	0.694823	NA	NA	NA	NA	NA	none	none	none	none	none	none
ENSMUSG00000026339	Ccdc93	none	91.9905	0.0984555	NA	112.964	0.403542	0.390508	45.2897	0.329555	0.908037	78.4213	-0.0627462	0.904894	166.522	0.147341	0.871316	0.02565	0.9033	none	none	none	none	none	none
ENSMUSG00000050677	Ccdc96	none	8.45862	0.696279	NA	7.36112	0.161652	NA	13.2252	-0.621969	0.888894	28.0062	0.370555	0.585807	NA	NA	NA	0.4463	0.2899	none	none	none	none	none	none
ENSMUSG00000002608	Ccdc97	none	194.889	0.0206817	0.981198	141.147	-0.299875	0.514249	126.92	0.0257847	0.994132	91.659	-0.378176	0.248712	70.897	-0.278322	0.819947	-0.1696	0.2096	none	none	none	none	none	none
ENSMUSG00000045838	Ccdc9b	none	6.22193	0.171307	NA	14.2136	-0.643576	0.749053	5.16494	0.309399	0.992723	14.4585	-0.438396	0.608616	NA	NA	NA	NA	NA	none	none	none	none	none	none
ENSMUSG00000096257	Ccer2	none	7.33042	0.707815	NA	NA	NA	NA	7.02154	0.804477	0.909399	NA	NA	NA	NA	NA	NA	NA	NA	none	none	none	none	none	none
ENSMUSG00000040312	Cchcr1	none	17.4895	0.170376	NA	5.75633	1.31278	NA	8.10658	0.832134	0.868619	64.8334	2.38129	7.07403e-14	3.61274	0.180269	0.980161	2.041	1.51e-18	none	none	none	increasing	none	increasing
ENSMUSG00000032532	Cck	none	2970.13	0.348526	0.0543057	1446.75	-0.351831	0.0995731	519.007	0.407453	0.281451	599.593	-0.153585	0.61053	42.9021	-0.933421	0.25394	-0.7567	7.662e-12	none	none	none	none	none	none
ENSMUSG00000030898	Cckbr	none	330.845	-0.327273	0.328556	42.1644	-1.93333	0.000656679	64.3872	-0.0702156	0.994132	133.747	-1.43625	8.10824e-09	5.38706	-1.17793	0.688061	-1.136	0.02213	none	decreasing	none	decreasing	none	decreasing
ENSMUSG00000031780	Ccl17	none	8.4195	0.771207	NA	4.95574	0.859499	NA	NA	NA	NA	4.23808	0.670783	0.729845	NA	NA	NA	1.038	0.1089	none	none	none	none	none	none
ENSMUSG00000023235	Ccl25	none	19.9395	0.176082	NA	16.3141	-0.444825	0.814291	10.435	-1.1099	0.665718	21.8238	0.201419	0.79758	NA	NA	NA	-0.126	0.7711	none	none	none	none	none	none
ENSMUSG00000073888	Ccl27a	none	105.241	-0.149655	0.851623	40.0477	0.444683	0.679431	34.3216	0.647442	0.632818	27.9146	0.16834	0.816087	NA	NA	NA	-0.4334	0.007195	none	none	none	none	none	none
ENSMUSG00000000378	Ccm2	none	95.0359	0.191325	NA	62.64	-0.188381	0.866811	38.9462	-0.022165	0.995591	57.8581	0.38937	0.369204	47.961	-0.292865	0.823783	-0.2821	0.03149	none	none	none	none	none	none
ENSMUSG00000028195	Ccn1	none	23.956	-0.39731	NA	NA	NA	NA	4.67776	-0.199242	0.994132	762.906	2.59426	1.12393e-55	NA	NA	NA	NA	NA	none	none	none	increasing	none	none
ENSMUSG00000019997	Ccn2	none	258.409	0.0877113	0.894885	36.4548	-0.973613	0.714482	31.1198	-0.482905	0.823716	395.381	-0.425699	0.210032	6.67719	0.477765	0.896027	NA	NA	none	none	none	none	none	none
ENSMUSG00000037362	Ccn3	none	1208.53	0.11463	0.747428	1839.25	-0.335367	0.019015	30.9503	0.60522	0.768394	1004.44	-0.199538	0.592311	26.7489	-0.433505	0.776617	NA	NA	none	none	none	none	none	none
ENSMUSG00000005124	Ccn4	none	8.37133	0.044523	NA	NA	NA	NA	NA	NA	NA	6.12632	-1.03293	0.408123	NA	NA	NA	NA	NA	none	none	none	none	none	none
ENSMUSG00000028252	Ccnc	none	273.837	-0.483293	0.18829	369.201	-0.0261316	0.97563	209.049	-0.115288	0.977337	236.688	0.128163	0.68418	64.6364	-0.353388	0.717202	-0.04062	0.8417	none	none	none	none	none	none
ENSMUSG00000070348	Ccnd1	none	124.627	0.247716	0.703503	179.927	0.515886	0.231913	24.4996	-0.307172	0.964767	273.028	2.76583	1.50953e-31	294.854	-1.35114	1.86814e-05	0.8563	3.07e-14	none	none	none	increasing	decreasing	none
ENSMUSG00000000184	Ccnd2	none	155.275	0.716285	0.077769	229.272	-0.0620475	0.94949	18.4558	0.200875	0.991361	258.517	0.736076	0.000429637	21.4123	-1.40728	0.177964	0.1819	0.1386	none	none	none	none	none	none
ENSMUSG00000034165	Ccnd3	none	20.2513	0.415105	NA	27.0412	-0.313752	0.877105	13.462	0.139727	0.994132	88.0555	0.753759	0.0113016	14.3407	1.36615	0.374003	0.7457	1.092e-07	none	none	none	none	none	none
ENSMUSG00000023572	Ccndbp1	none	474.115	0.0721689	0.880154	397.8	-0.0750962	0.909308	426.262	0.0506411	0.992723	328.188	0.421795	0.036328	119.135	0.523524	0.384718	0.05701	0.7362	none	none	none	none	none	none
ENSMUSG00000002068	Ccne1	none	179.439	0.0258832	0.977706	135.982	0.164501	0.847581	82.0931	0.0190289	0.995591	29.8935	-0.072916	0.927649	NA	NA	NA	-0.4275	0.01332	none	none	none	none	none	none
ENSMUSG00000028212	Ccne2	none	48.8641	-0.426505	NA	41.6606	0.349934	0.760619	43.3581	0.263607	0.953003	10.1687	-0.389312	0.708689	4.34456	-0.380577	0.93453	0.1364	0.7642	none	none	none	none	none	none
ENSMUSG00000072082	Ccnf	none	32.3455	0.0100955	NA	27.1354	0.934806	0.212123	7.14122	-0.0284325	0.997183	5.15598	0.583721	0.701279	NA	NA	NA	0.4478	0.08106	none	none	none	none	none	none
ENSMUSG00000020326	Ccng1	none	301.1	0.148362	0.757633	326.647	-0.43872	0.0617275	129.072	-0.025166	0.994132	379.801	0.743484	4.23763e-05	105.834	-0.272571	0.761021	0.05311	0.7444	none	none	none	none	none	none
ENSMUSG00000029385	Ccng2	none	147.592	0.219348	0.714992	237.212	0.0534905	0.950508	91.0676	-0.213292	0.950864	88.3277	-0.306286	0.393109	139.794	-0.0982749	0.921222	-0.03887	0.8674	none	none	none	none	none	none
ENSMUSG00000021548	Ccnh	none	423.986	-0.345948	0.291933	751.76	0.0175095	0.980844	449.48	0.0484917	0.994132	306.107	-0.0159772	0.969967	66.2407	0.024692	0.989318	-0.2063	0.1675	none	none	none	none	none	none
ENSMUSG00000063015	Ccni	none	85.4089	0.795965	NA	66.1218	0.628677	0.264453	82.5135	0.304443	0.871485	82.6048	0.752155	0.0183199	78.3463	-0.552545	0.444457	-0.03842	0.8195	none	none	none	none	none	none
ENSMUSG00000025010	Ccnj	none	15.2733	0.137195	NA	11.9135	-0.0848822	NA	10.2303	0.150225	0.994132	14.4981	-0.151942	0.888884	3.43413	0.148238	0.983506	-0.05088	0.8471	none	none	none	none	none	none
ENSMUSG00000044707	Ccnjl	none	6.79615	0.218734	NA	14.5527	0.293326	0.915694	4.58771	-0.894468	0.939043	9.32307	-1.70053	0.0407517	NA	NA	NA	-0.3851	0.1461	none	none	none	decreasing	none	none
ENSMUSG00000021258	Ccnk	none	76.4548	0.392257	NA	72.4446	-0.139358	0.904974	42.0169	-0.0797635	0.994132	86.2917	-0.158564	0.711152	54.6866	-0.088512	0.956602	0.04932	0.7986	none	none	none	none	none	none
ENSMUSG00000027829	Ccnl1	none	77.8535	0.120026	NA	108.376	-0.0933531	0.935111	71.7218	-0.256723	0.924628	41.0038	-0.388219	0.417477	40.5183	0.207622	0.892038	0.09309	0.6617	none	none	none	none	none	none
ENSMUSG00000029068	Ccnl2	none	93.3907	-0.208923	NA	119.526	-0.038941	0.977123	46.011	-0.160088	0.983338	84.4517	0.433307	0.190485	41.4783	0.0700344	0.972524	0.06233	0.7126	none	none	none	none	none	none
ENSMUSG00000042417	Ccno	none	7.61209	-0.524633	NA	8.42102	-0.0440968	NA	NA	NA	NA	NA	NA	NA	NA	NA	NA	0.1106	0.8282	none	none	none	none	none	none
ENSMUSG00000049489	Ccnq	none	65.9267	-0.120214	NA	73.6741	-0.130987	0.909308	40.9577	0.277457	0.948922	82.1871	0.475945	0.177468	25.9	0.57126	0.704296	NA	NA	none	none	none	none	none	none
ENSMUSG00000011960	Ccnt1	none	259.088	0.0234488	0.976995	369.458	0.237799	0.533411	208.88	0.0315814	0.994132	166.431	-0.113794	0.754492	80.0363	0.459282	0.560125	-0.1995	0.2542	none	none	none	none	none	none
ENSMUSG00000026349	Ccnt2	none	221.306	-0.0459132	0.951859	300.346	0.249727	0.515816	96.1858	0.0742752	0.993124	117.134	-0.397888	0.213177	42.4916	-0.699239	0.458536	0.03718	0.8349	none	none	none	none	none	none
ENSMUSG00000024286	Ccny	none	318.242	0.0555741	0.934263	275.666	-0.0100279	0.990873	137.1	-0.0961647	0.991361	255.021	0.168435	0.572107	93.4115	0.344656	0.673424	-0.0008607	0.9968	none	none	none	none	none	none
[truncated: 14,516 more rows]
